# Supplementary material for: A severe neurodevelopmental syndrome linked to a South Asian founder variant in the UFMylation adaptor CDK5RAP3
Source: Acta Neuropathol. 2026 Apr 27;151(1):48. doi: 10.1007/s00401-026-03017-2 (PMC13121207; doi:10.1007/s00401-026-03017-2)
Supplement: Supplementary file 2 — Supplementary file2 (XLSX 2781 KB) [file 401_2026_3017_MOESM2_ESM.xlsx]

## Sheet: Differential Expression
Comparison	Uniprot_Accession	Gene_Name	Log2_Fold_Change	Average_Log2_Expression	T_Statistic	P_Value	Q_Value	B_Log_Odds	C4_1	C4_2	C4_3	C4l_4	II:3_1	II:3_2	II:3_3	II:3_4
Patient_vs_Control	A0A024R3Z1	MAP2	-0.199021	17.110019044918015	-3.69068	0.00673043	0.012407365243491689	-3.8424	17.176292162108528	17.16345132821312	17.274489476416246	17.22388426792841	17.158592127293375	16.97065243714774	16.904038217391665	17.008752342845035
Patient_vs_Control	A0A087WUW5	PTBP1	0.4543998425069091	19.81824596083074	16.148776380945794	3.811639820764711e-7	6.500361103808578e-6	6.955661200097474	19.57626391139509	19.555781516942048	19.633473750653277	19.59866497931874	20.111778753352237	20.030065604290748	19.995792091166344	20.04414707952744
Patient_vs_Control	A0A087WWU8	TPM3	-0.137112	18.293785050465637	-9.91315	1.3194629020766392e-5	7.956001743157406e-5	3.0246773818209416	18.35616082025357	18.357748100886297	18.37077713358444	18.36467796962361	18.252636687398475	18.217186899165604	18.20605100165739	18.22504179115572
Patient_vs_Control	A0A087WXL6	VPS11	-0.194482	17.368688078442492	-14.0332	1.071480760537537e-6	1.2660117335671675e-5	5.813525733937874	17.468737010961366	17.48828840133727	17.443517941266094	17.46317285941506	17.258345058447297	17.271881764058506	17.28331898263267	17.27224260942168
Patient_vs_Control	A0A087WZL0	PHLDB1	-0.069321	16.539531775678974	-3.71123	0.00654105	0.012098	-3.8118	16.56390430008939	16.5941	16.56302894333789	16.575783620195963	16.549614773537364	16.487115714641185	16.477231228134876	16.50552333597652
Patient_vs_Control	A0A087X243	GSTP1	0.6830637037349767	20.339532962322618	6.84964	1.6827038277659144e-4	5.680584073206984e-4	0.19564003903221128	19.92923666598811	20.05509544938195	19.992712019425788	20.01496030702467	20.982551878793252	20.57440065373842	20.48453442645812	20.682772297770637
Patient_vs_Control	A0A096LP07	GPS1	0.0881322	13.13946746346962	2.0322101776801866	0.0785463	0.10754649175793779	-6.38561	13.084360038612369	13.211742439500508	12.996336150166668	13.089166785126412	13.228509113596344	13.14938756118875	13.168674232301257	13.187563387264651
Patient_vs_Control	A0A0A6YYK5:Q96BK5	NA:PINX1	0.13935351792781603	17.360595688376733	6.69513	1.956858115335152e-4	6.396140536337188e-4	0.0284105	17.282920779151272	17.255665155087286	17.32869670988291	17.296393073529824	17.46668122604182	17.424518978576963	17.400886632277636	17.429002952466142
Patient_vs_Control	A0A0B4J269:Q13509	NA:TUBB3	-0.528361	17.65574766856239	-5.38798	7.845224875847645e-4	0.00201215	-1.50447	17.86507216003534	17.78796365927534	18.0784	17.948293621394853	17.637761445208927	17.33466603780856	17.20713244389355	17.38670887542205
Patient_vs_Control	A0A0B4J293:Q96EP0	NA:RNF31	-0.0665533	16.006974725426574	-4.7975	0.0015802	0.00360235	-2.27218	16.046048319177448	16.024909803695945	16.05034571348639	16.039701665675604	15.948619560159266	15.984361943832578	15.988625609741549	15.973185187643796
Patient_vs_Control	A0A0B4J2A0:Q9UHJ6	NA:SHPK	-0.10067	16.884507948934232	-6.76147	1.8334910698841072e-4	6.0634745436113e-4	0.10054593317563487	16.94208532408833	16.922521413807395	16.941180995850104	16.933584014991062	16.80262192624196	16.84640876429861	16.85388908444139	16.83377206775501
Patient_vs_Control	A0A0C4DFV9	SET	-0.164303	8.601344715215658	-10.0785	1.173186361307674e-5	7.265993901839387e-5	3.1554033582539045	8.677616691703356	8.7135	8.660025382936723	8.682846908925637	8.544166469952184	8.506084365748794	8.506302551853238	8.520219390549407
Patient_vs_Control	A0A0C4DFX4:Q6ZRS2	NA:SRCAP	-0.0635325	13.60812282441963	-3.899	0.00505344	0.00965469	-3.53442	13.6316	13.632638056228522	13.652234202095707	13.643128816192034	13.613348831298245	13.565679831959809	13.550330656026484	13.576066925269538
Patient_vs_Control	A0A0C4DGI8	DTX3	-0.050377	15.154903102977286	-0.522604	0.6161724308738065	0.6651820062449045	-8.09813	15.24657328861434	15.127090366994302	15.183191111083492	15.163511740531655	14.83816561633718	15.2325	15.320063110637054	15.128140792747264
Patient_vs_Control	A0A0C4DGP4	PRKCSH	-0.214429	22.673932330582893	-1.31125	0.22808972451786905	0.27620417386890217	-7.3735	22.884748281961624	22.91236411734353	22.590035418590823	22.737438843900954	22.105533383360708	22.69292258853125	22.896657986613004	22.57175802436125
Patient_vs_Control	A0A0G2JL56	HLA-A	-1.026	20.59891701913666	-45.0516	1.7374745942266622e-10	6.677389203706888e-8	15.04330120736456	21.09859998287388	21.138596513350937	21.09656992374042	21.113892375416764	20.143795034833268	20.062784640258556	20.050300123654683	20.08679755896477
Patient_vs_Control	A0A0G2JLL3:Q9UMR5	NA:PPT2	0.41119865416421497	15.062124437295154	11.89583698577182	3.5707199953931044e-6	3.0388575065688165e-5	4.478110580812531	14.874404191085544	14.905287167849234	14.799609756824024	14.846799325093386	15.187298002760054	15.28535613614386	15.32873215490108	15.269508763704042
Patient_vs_Control	A0A0G2JMG9	ZNF66	0.14818416474412643	14.153429829453922	0.6128909328844576	0.5578807779949919	0.6103654946635754	-8.04252	13.959878959864842	13.664845940971013	14.54089297281598	14.1517	14.767726549339454	14.123795370848631	13.806078154212056	14.212487572903802
Patient_vs_Control	A0A0J9YW13:Q9Y5S9	NA:RBM8A	0.00603227	15.282880863976343	0.4117638005108495	0.6919069725403484	0.7365949429201959	-8.15504	15.275643087017931	15.25794811531754	15.302837043580508	15.283030679710516	15.305220551514587	15.283385581136825	15.269870877088366	15.28511097644448
Patient_vs_Control	A0A0J9YXH6:Q6P996:Q6P474	LOC124900586:PDXDC1:PDXDC2P	0.0651377	18.678768850247007	1.6734162131348123	0.1348662722109876	0.1735624814389551	-6.90216	18.658466402068537	18.54581713876733	18.729802875035837	18.650713623944807	18.66044716786427	18.744688282109415	18.73234299261448	18.70787231957139
Patient_vs_Control	A0A0J9YYC6	MED16	-0.00515406	12.042306836334573	-0.240466	0.8163432882237545	0.8452834218108133	-8.21729	12.053539231524216	12.08013128435151	12.006662392229208	12.039202558476266	12.000422293940744	12.046417070480247	12.071077978763595	12.041
Patient_vs_Control	A0A0J9YYE0	TAF15	0.26714923583302763	25.931843857978436	4.708887618339093	0.0017628	0.00392677	-2.39164	25.75948906946373	25.81923978820234	25.80557614836904	25.808771954212585	26.235803836507635	26.007047550105693	25.95283455975482	26.06598795721164
Patient_vs_Control	A0A0M3HER2	CENPV	0.0689613	13.875349032362744	0.7053820050821152	0.501666	0.5562049171831401	-7.97732	13.90452050564896	13.71402323892595	13.91357510415642	13.831354602938456	13.633127239452415	14.020314435288618	14.080220968976286	13.90565616351484
Patient_vs_Control	A0A0U1RR11:P0DPI3:A0A0U1RRI6	CENPVL1:CENPVL2:CENPVL3	-0.30588	9.241878200987284	-2.51431	0.0376684	0.055735538669253994	-5.65031	9.472494191160752	9.219900629935015	9.50199	9.384890262020464	8.75192	9.226961352300131	9.293735328133025	9.083140066128294
Patient_vs_Control	A0A0U1RRE5	NBDY	-0.146235	7.479376036116476	-2.29839	0.05234	0.0750312	-5.98324	7.579403920531892	7.398112351497261	7.67557	7.556892609620138	7.2925	7.468968217290184	7.462598113828321	7.400963310044352
Patient_vs_Control	A0A140T941	HLA-A	0.2452792733842717	13.130703702420806	3.7189475886109578	0.00647136	0.011984235322566539	-3.80031	13.014375894433776	13.18696483235873	12.839798831851295	12.991116704270878	13.219770979840057	13.233892161794708	13.30007080027572	13.259639414541294
Patient_vs_Control	A0A140T955	HLA-A	-0.730072	18.110640106308427	-18.0486	1.672028471424419e-7	3.964010356604255e-6	7.861872379090247	18.471155491699072	18.58721195312157	18.37655510204816	18.467782786438676	17.761971923192373	17.721475501283276	17.74947498873204	17.749493103952247
Patient_vs_Control	A0A140T9L0	WDR46	0.12508108125477868	15.185357661027325	4.382499994475143	0.00266346	0.00555992	-2.84127	15.123334373634744	15.047246605651504	15.191717599838125	15.12896990247537	15.24803759079524	15.26063299260416	15.237670007192564	15.245252216026891
Patient_vs_Control	A0A140T9W2	HLA-C	-2.92472	10.449384063930296	-50.0791	7.80964937464893e-11	4.073289980977606e-8	15.797197719637666	11.887504469456056	12.054142916465883	11.797825757422066	11.907502222908803	9.089380931894487	8.930008212539565	8.936797044251492	8.991910956504022
Patient_vs_Control	A0A1B0GTL5	RAB11FIP5	-0.020559	20.242279548056803	-1.2514	0.24802265173562488	0.29816618422349894	-7.4448	20.255570853464317	20.28516354724818	20.22061966965741	20.248882142555335	20.217670647945077	20.23109708090803	20.24607700758403	20.233155435092048
Patient_vs_Control	A0A1B0GVR8:P36578	CLN6:RPL4	0.13048288893102367	17.51185820125472	4.410611205282976	0.00256885	0.00539792	-2.80195	17.427876037975917	17.438166324415274	17.467179103996074	17.453245560769574	17.660034627784924	17.551842834043132	17.51979752281529	17.576723598237596
Patient_vs_Control	A0A1W2PP11:Q9H300	NA:PARL	-0.457921	12.271763077728943	-10.7695	7.308639585470328e-6	5.171287427626389e-5	3.6818371741266844	12.528749284323135	12.510277385780002	12.472799666109855	12.491068440056155	11.918877085419952	12.081062114634795	12.128013879124309	12.043256766383344
Patient_vs_Control	A0A1W2PQ90:Q92878	NA:RAD50	-0.0536639	21.61866389142872	-4.08036	0.00395809	0.00781134	-3.27074	21.644926295907165	21.66911396995435	21.62424129175328	21.643701808702016	21.593587549080222	21.58727300795225	21.593810053757966	21.59265715432252
Patient_vs_Control	A0A1W2PS85:P28715	BIVM-ERCC5:ERCC5	-0.0696702	15.233754802818508	-2.63792	0.031232141755649267	0.0471875	-5.45839	15.278232888354644	15.319904395030951	15.21496868580616	15.261253552394065	15.154741051803072	15.204457287276336	15.235721516098817	15.200759045784022
Patient_vs_Control	A0A286YES4:O14495	NA:PLPP3	0.1747464479636207	21.349966121805263	5.062486363352346	0.00114713	0.00275356	-1.92158	21.253340275679665	21.18238928628314	21.34242159995823	21.272220429372773	21.480721535423964	21.436943468670417	21.397203039636057	21.43448933941785
Patient_vs_Control	A0A2R8Y3M9:Q9BZM1	NA:PLA2G12A	0.14803559792941812	17.298172529248923	9.23135	2.1822271724632746e-5	1.1530117809932584e-4	2.464920114750619	17.225901313023236	17.257415953938725	17.192478885959947	17.22082276821494	17.363420698195352	17.369387350925148	17.382589925421787	17.373363338312235
Patient_vs_Control	A0A2R8Y6H1:O00400	NA:SLC33A1	-0.0858328	17.788134888618917	-4.44115	0.0024702	0.00524038	-2.75936	17.841603516337283	17.84287131336426	17.81300169725455	17.826728597378047	17.698294510426773	17.758318278901122	17.77858349262815	17.74567770266116
Patient_vs_Control	A0A2R8Y793	ACTB	0.22166479366607206	24.21754404828397	3.0936333187390095	0.015819915179471015	0.02598	-4.75052	24.068630532068696	24.254687379892697	23.997150443270865	24.10637825057146	24.49160961319408	24.250829170191366	24.23766749069037	24.333399506392205
Patient_vs_Control	A0A2R8YDH4:Q9UDY2	NA:TJP2	0.4201375559711735	18.29567504252884	13.504124155099365	1.4195584400603955e-6	1.5517388816348815e-5	5.501858792827996	18.105984735915175	18.0691	18.086816187284683	18.08054776883845	18.416385068936872	18.537291992796003	18.564046745073895	18.50525147525094
Patient_vs_Control	A0A2R8YDM9	ATXN2	0.17231239294720524	14.859563238203872	11.281272904821602	5.2363376222739335e-6	4.041832697446539e-5	4.052605427805551	14.779967123130277	14.787684681038622	14.755835798642488	14.770140564109695	14.916325885453196	14.952762874273072	14.96754124170976	14.946247737273874
Patient_vs_Control	A0A2R8YDQ0:Q9H267	NA:VPS33B	-0.0134702	19.419198868528486	-0.598163	0.5671660659647653	0.6190503159453985	-8.05214	19.43642031898139	19.457617142730463	19.389726506274688	19.419971939920305	19.36519409379355	19.42231574047044	19.448726463536193	19.41361874252086
Patient_vs_Control	A0A2R8YHD2	TPM4	0.19629003367399278	24.06221439416474	1.4898384832163363	0.17664637836599445	0.21940327518770056	-7.14891	23.887142768916338	24.205818705166735	23.79514164188337	23.96817439334453	24.49193374933295	24.01278732666807	23.9682	24.16850288727833
Patient_vs_Control	A0A2U3TZJ3:Q9C035	NA:TRIM5	-0.203515	15.948479094633562	-16.9129	2.707543154203558e-7	5.3146451913963395e-6	7.3323369891990176	16.046363047725908	16.043659208074935	16.058913317948708	16.05201029039606	15.864017863291416	15.842268644788684	15.834125664822562	15.84647472002023
Patient_vs_Control	A0A3B3IRK5:Q9H2D1	NA:SLC25A32	0.075542	23.354566604631202	1.5470934777408647	0.16249692862659576	0.20404746705572233	-7.07352	23.34289300423777	23.38590517423751	23.23561226397267	23.302771974005736	23.27500944619318	23.41840305717076	23.48106723394438	23.394870683287618
Patient_vs_Control	A0A3B3IRW8	SORBS1	0.5714969742191087	31.39133084410526	22.560512403471407	3.167453083685348e-8	1.3455049559954576e-6	9.674422181411952	31.099752972921017	31.16983322098682	31.050688794526753	31.10205443954822	31.700734089357343	31.658602589130005	31.669674654327185	31.67930599204472
Patient_vs_Control	A0A3B3IS24:O75688	NA:PPM1B	0.3059120795031127	20.38557237587112	5.302772069059907	8.653487194530188e-4	0.00218341	-1.61224	20.26361611354669	20.314982192237434	20.13593157109305	20.215935467601085	20.399151467661216	20.56944671554622	20.643968543322497	20.541546935960785
Patient_vs_Control	A0A3B3ISG8:Q16795	NA:NDUFA9	-0.114931	19.721909200900054	-2.22498	0.058546076860822145	0.0828014	-6.09533	19.809555680766508	19.83649135148544	19.70638883108696	19.765062941854843	19.529487303987352	19.698209470651364	19.76350409760807	19.666573929759902
Patient_vs_Control	A0A3B3ISV4	VKORC1L1	-0.0863939	15.4508	-2.29672	0.052473310710842457	0.0751589	-5.98579	15.469503809177398	15.530651162864176	15.477169182340132	15.498679221604023	15.51448782695624	15.367018099760935	15.340134907528425	15.408786750283078
Patient_vs_Control	A0A3B3ITS5:Q14181	NA:POLA2	0.26080927048859337	19.261467416033334	2.709770368936331	0.028021724813995477	0.042923145498593454	-5.34662	19.064676761576912	19.151032326285303	19.158168775464617	19.15037325982932	19.68405733837965	19.29447903935808	19.196663100799633	19.392288726573163
Patient_vs_Control	A0A494BZV2	MPRIP	0.15110351990891147	21.916881007782372	5.265621432032333	9.034251735351939e-4	0.00226383	-1.65954	21.85595034812119	21.880352462820472	21.795567138292256	21.833447042077733	21.926689768668876	22.006987615211873	22.042191088933137	21.993862598133425
Patient_vs_Control	A0A494C0A6:Q8IWB7	NA:WDFY1	-0.0609363	19.154545322139576	-5.72129	5.396000806543736e-4	0.00147021	-1.0925	19.18337533361145	19.19127458618849	19.180396104342996	19.185007847630622	19.131102315376133	19.120757898323024	19.120158895105753	19.12428959653813
Patient_vs_Control	A0A494C1T6:P31040	NA:SDHA	-0.142714	17.96329757808293	-3.80464	0.00574936	0.010786702744116413	-3.67327	18.05943805087825	18.036835618626704	18.015704714715103	18.026640226470807	17.78255244722848	17.926769300075307	17.966317644762334	17.89212262190646
Patient_vs_Control	A0A590UK80:Q13247	NA:SRSF6	0.033316609055034974	17.840038460878326	1.6136427086687566	0.1473509421658412	0.18780879380257853	-6.98406	17.811124114239426	17.82070634749025	17.834213329344614	17.82747683432896	17.910843141277223	17.839726338694188	17.81966678087178	17.85655080078017
Patient_vs_Control	A0A5F9UQ55	FBXW4	-0.000194	7.944601470600431	-0.00343086	0.9973511214265854	0.9978347500597982	-8.24987	7.909050575006019	7.902748568087604	8.007524885994336	7.959470471698085	8.103089782125815	7.900570653566289	7.831474578818101	7.94288
Patient_vs_Control	A0A5F9ZHJ0	ACAT1	0.017353108852407928	22.956215631983888	0.4077789966028944	0.694708	0.7390002046750301	-8.15684	22.921244050561548	22.91502075491408	22.995324669150428	22.958566835604667	23.08191983542013	22.93273552562807	22.881272864643893	22.96364051994827
Patient_vs_Control	A0A669KBG4	WIZ	0.013410235081014577	17.662969246583582	0.4809356171063607	0.6441339194708059	0.6913811377297994	-8.12101	17.640003947354202	17.63344133528133	17.68830095495096	17.66331027858581	17.74212826583733	17.65022052598823	17.617543415209635	17.66880524946115
Patient_vs_Control	A0A669KBH8:Q9Y320	NA:TMX2	0.13135384423062035	19.716943316926976	7.064243251334448	1.3702324213036497e-4	4.8149360636955005e-4	0.42337514527513775	19.642569459648723	19.629976629601614	19.676725241998767	19.655794247997555	19.82166397032004	19.773657488506597	19.753322397260703	19.78183710008182
Patient_vs_Control	A0A6I8PIX7	SVIL	-0.4466	14.160194376615761	-14.2407	9.621268345374593e-7	1.176792319228229e-5	5.932714520461332	14.364804690193672	14.42896036206898	14.354612382315018	14.385600998419166	14.01787779785837	13.903147505710484	13.888143595878097	13.9384
Patient_vs_Control	A0A6Q8PGI1	CALD1	-0.289253	10.90843592596342	-3.58159	0.00783973	0.014169736212673102	-4.00573	11.003219845253197	10.979377027876378	11.154680270691587	11.074972537731002	10.98602282337032	10.704769040492897	10.603431121815046	10.761014740476938
Patient_vs_Control	A0A6Q8PH06:Q9C040	NA:TRIM2	-0.2383	14.34674430674398	-19.3569	9.936248370786247e-8	2.8576017210156804e-6	8.431648343059184	14.464945501215237	14.485456901657278	14.448615750660926	14.464559104743843	14.231152757951808	14.22314109295631	14.227807567169068	14.228275777597377
Patient_vs_Control	A0A7I2V2H3:P25787	NA:PSMA2	-0.0540555	15.986854786227587	-3.81682	0.00565403	0.010637982786211975	-3.65529	16.008638803797602	16.034469986180937	15.998602440850636	16.013818989936656	15.98229737671581	15.949115249657677	15.947369349731034	15.960526092950351
Patient_vs_Control	A0A7I2V2X8	DPP4	-0.867423	5.27768	-11.0811	5.955941519723343e-6	4.4697106862302e-5	3.9094385351282916	5.7642	5.727164270362078	5.66082	5.693384945178538	4.610532302147256	4.9164141523967455	5.004182378863469	4.844746834371622
Patient_vs_Control	A0A7I2V3P9	G3BP2	0.2829852301914073	24.86969339723237	3.1088000674245486	0.0154715	0.025467335399027072	-4.72709	24.679090286524485	24.914506532888133	24.591057039519157	24.72814926961489	25.22184120964597	24.91189788252539	24.89349973378073	25.01750522336021
Patient_vs_Control	A0A7I2V3T6	BTF3	0.8409073437222361	20.1459	3.2020023172056002	0.013500496565893591	0.0226414	-4.58342	19.55812253022566	19.521625573856113	20.02664101655718	19.79534068738058	21.310863651983308	20.361241108143293	20.034770073151012	20.558484349630845
Patient_vs_Control	A0A7I2V4V1	PPIA	0.4599177924879818	26.934743223588313	10.424928646617301	9.221965484768096e-6	6.075681966405171e-5	3.4232	26.678170354376576	26.77403291033774	26.65952692720959	26.707407117453386	27.279876434248493	27.11593212031197	27.095984648966432	27.167015275802317
Patient_vs_Control	A0A7I2V5R6	GNAS	-0.0302501	12.620165841653964	-0.498177	0.6324863816712765	0.6804796756981967	-8.11176	12.597118798838704	12.723290703019192	12.580754978739504	12.63999907281292	12.7706	12.536888624245115	12.50471619707783	12.607961752995244
Patient_vs_Control	A0A7I2YQN2	SYNCRIP	0.20982547125446338	14.57100755609581	4.956596094502256	0.00130219	0.00306235	-2.06049	14.451112720937513	14.375432992526818	14.559426459794924	14.478407108615055	14.744909924220153	14.669053326135142	14.61703854885467	14.672679367682203
Patient_vs_Control	A0A7P0T8A7	BSG	0.4310827750247057	20.81936336610177	7.749579694033567	7.332603801140473e-5	2.9647105734179253e-4	1.1173660671684047	20.56597765714262	20.61054804640013	20.62354270302982	20.61521950778508	21.201618469594223	20.980124114477256	20.92289736883733	21.034979061547677
Patient_vs_Control	A0A7P0TAR2:O43674	NA:NDUFB5	-0.136489	18.314486121844233	-2.47244	0.0401446	0.059040490476650415	-5.71517	18.4204	18.36787343704964	18.370577885986226	18.372066499553203	18.08054059568108	18.30207154357215	18.35647292985478	18.245881731980777
Patient_vs_Control	A0A804CD06	PTPA	0.00661388	11.98917115731373	0.364836	0.7252002343073576	0.7662295052687491	-8.17525	11.9755	11.996978987584392	11.982737687862066	11.988196887572872	12.037646960042228	11.97606457743204	11.963377271899729	11.992823571576526
Patient_vs_Control	A0A804F6T5	PKM	-0.193554	17.861681216711055	-4.61181	0.00198978	0.00435012	-2.5238	17.955268330537315	18.074504353831333	17.85429355326855	17.9498	17.77525756741546	17.741948215834487	17.773453411036602	17.768957004239407
Patient_vs_Control	A0A804HL02	MCCC2	-0.33245	18.723533113291193	-9.41569	1.898828929112471e-5	1.0472242326570442e-4	2.6196839942811163	18.912116478048077	18.8483	18.912441795247585	18.886155767323498	18.460013735732065	18.59562242568039	18.61764539085228	18.55595142331376
Patient_vs_Control	A0A8C8KBL6	ITGA6	0.18160360042896784	21.054344228056888	4.0351947754705355	0.00420448	0.00823528	-3.33601	20.93602479378879	20.92543773633502	21.01728370930215	20.975423471943657	21.267745492795864	21.112141237810217	21.057003995813886	21.143693386665525
Patient_vs_Control	A0A8I5KRC6	MACROH2A1	-0.720194	8.650868638782741	-11.0343	6.139826369173483e-6	4.556200421514713e-5	3.875627518971706	9.05559	9.002609301105743	8.988101060118666	8.997561467239715	8.094202588592115	8.355434637428356	8.422780633753764	8.290669264705063
Patient_vs_Control	A0A8I5KT88	PDIA3	-0.34488	6.331746230635904	-2.2145	0.0594897	0.084022	-6.11126	6.612023539175441	6.468746001238696	6.462906241938592	6.473069259286024	5.684777336970676	6.317987843750035	6.475935458515812	6.158524164211955
Patient_vs_Control	A0A8I5KUE3	PLEC	0.5384904261118209	20.263507571793607	16.37760714237377	3.435114846284579e-7	6.199973494261908e-6	7.070285623950957	20.014210411344056	20.018318651203295	19.958572714376984	19.985947658026447	20.44399237405073	20.55724494639644	20.59609296703016	20.53368085192073
Patient_vs_Control	A0A8I5KX85	CDV3	0.5152405555939961	5.869428423345841	3.821077282245525	0.00562106	0.0105922	-3.649	5.518934446219295	5.620905263628774	5.666994788654682	5.6403980836926255	6.53642	5.9937882116474395	5.851017199723119	6.126971418034578
Patient_vs_Control	A0A8I5KZ38	MYH10	-0.592475	18.290772849079083	-9.10702	2.400114719712251e-5	1.2403140610997066e-4	2.3590441549839287	18.607552364131045	18.41460193090977	18.73095804491351	18.594928393916145	17.909448343314907	18.05106963495109	18.029042604372417	17.988581476123763
Patient_vs_Control	A0A8Q3SIA8:Q9H8H3	NA:TMT1A	0.23546425806401317	10.706151409884217	1.840727111069106	0.10498179541215705	0.13902377042066935	-6.66602	10.505979294332535	10.501255893371177	10.72468448350622	10.621757452198915	11.190314073047396	10.720717880296627	10.564024674509016	10.82047752781186
Patient_vs_Control	A0A8Q3WKK6:A0A0J9YXC7:P0CW20	LIMS1:LIMS3:LIMS4	-0.279071	16.081201453699965	-10.1325	1.1294564103295268e-5	7.091393558234054e-5	3.197664602793454	16.21547275377919	16.292650129337815	16.158435326067487	16.21639021587601	15.962582772813048	15.922774253332117	15.937142804388042	15.944163374006008
Patient_vs_Control	A0A8V8TLD8:O75152:A0A1B0GTU1:P0DQW0	LOC441155:ZC3H11A:ZC3H11B:ZC3H11C	0.11106587425162928	16.096	2.5201	0.037338965678938754	0.0552592	-5.64135	16.011656093208945	16.025601287085227	16.073838396338164	16.0508	16.279180726996465	16.112997945458527	16.063113065551097	16.150904660446766
Patient_vs_Control	A0A8V8TLX7	LRRFIP1	-0.286457	17.529494701869023	-15.8131	4.451262927805935e-7	7.1948922074277615e-6	6.784583965013159	17.67099959288767	17.715362696966857	17.63482694382403	17.66970431960734	17.39250359520578	17.37704827554306	17.387759332216984	17.387752858700456
Patient_vs_Control	A0A8V8TN88	CAMK2D	-0.0651452	3.156384343078148	-0.737115	0.48323709818188854	0.537896	-7.95309	3.1279695068242663	3.2278825052280986	3.194998821365113	3.204977006403489	3.3915769681978105	3.031070685430141	2.9476835583212626	3.124915692855005
Patient_vs_Control	A0A8V8TR85:Q6AI08	CAMTA1:HEATR6	0.0935243	16.88597217344926	5.645982629903699	5.864640627112681e-4	0.00157904	-1.18427	16.834473055725326	16.87321628111279	16.81128595237944	16.83786471434479	16.952539327453692	16.920610966747514	16.923881274693613	16.933905815136924
Patient_vs_Control	A0A994J3S8	GLS	-0.0308808	23.653617040097487	-0.261194	0.8008976147139875	0.832241	-8.21146	23.587206455033044	23.71464212800082	23.683266955750177	23.691114309587576	23.99775650235773	23.514766412857092	23.40075859412756	23.63942496306591
Patient_vs_Control	A0A994J434	HMGA1	0.0798405	7.588681838282305	1.6086828656401992	0.14843344697371275	0.18889224058792903	-6.9908	7.58038	7.483510429483523	7.586933007109896	7.54422	7.4912269508572384	7.68384	7.712891425797068	7.626450346024335
Patient_vs_Control	A0A994J4Y3	SRRM1	0.00814699	11.954626732412102	0.32395613818921853	0.7547270143169007	0.7935229169966895	-8.19092	11.966242482640542	11.95413327578408	11.936541345524583	11.945295841142125	11.889381148337314	11.980399500083797	12.006127674595144	11.958892591189226
Patient_vs_Control	A0A994J4Y8	PGAM5	-0.106206	19.045060809194396	-8.89053	2.8402800479324617e-5	1.4127878004089123e-4	2.17173	19.101502257235403	19.085271382586395	19.107695304881968	19.098186366510784	18.977645184768676	18.998743360947692	18.999922374449163	18.991520242175092
Patient_vs_Control	A0A994J508	VASP	0.2442519416917488	13.037450823055499	9.534794263680318	1.7377547269870602e-5	9.783411732042802e-5	2.7183063234735894	12.908556947263053	12.979432872075682	12.861204120942237	12.912105468557533	13.187375891394783	13.139790690678804	13.149346146865357	13.161794446666548
Patient_vs_Control	A0A994J514:P61586	NA:RHOA	0.17729830128520874	13.080110750067663	4.7333984439619075	0.00171008	0.00383508	-2.35848	12.98617953806584	13.09389293757932	12.901204362689386	12.984569559365688	13.188777305627951	13.144996888229542	13.1689	13.172326840860968
Patient_vs_Control	A0A994J705	HMGA1	0.8101516462662666	19.100487768262706	17.405926421966257	2.1882665632095746e-7	4.699624248398916e-6	7.566466902672053	18.723380284392313	18.73959923635351	18.635788180967022	18.682880078805447	19.380781230189378	19.538242147604297	19.595999682258967	19.50723130553072
Patient_vs_Control	A0A994J749:P12268:A0A994J420:Q2TAL8	IMPDH:IMPDH2:NA:QRICH1	0.0991122	20.540668627441022	3.692691051198386	0.00671164	0.012376	-3.83941	20.478523449018105	20.450021504767584	20.53737977849867	20.49852540498658	20.647070858989213	20.57888228720623	20.54621464185188	20.5887
Patient_vs_Control	A0A994J7S7	RAPGEF2	-0.0500699	17.079517494447348	-2.3564	0.047907	0.0691611	-5.89421	17.115582382767233	17.12612659669111	17.077237201112624	17.099263505896715	17.00513887718616	17.066711422610418	17.090794347149032	17.055285622165506
Patient_vs_Control	A0A994J7X3	VASP	-0.0275839	14.02141178727272	-1.34861	0.21636129449147065	0.2632239540780938	-7.32795	14.026166133090632	14.074151193040574	14.00569311249228	14.0348	14.046236573918398	13.98860780591346	13.986688780374289	14.008946092674336
Patient_vs_Control	A0A9L9PXJ4	MYL10	0.6249064881042052	23.27999795512774	3.9142070529772064	0.00495004	0.00949258	-3.51215	22.859455582623575	22.92897252804976	23.07682340966033	23.00492732396889	24.07046200815021	23.445165334606504	23.263538884686316	23.590638569276344
Patient_vs_Control	A0A9L9PYL0	MFF	-0.0284764	17.39968146216244	-1.06963	0.3176561243146365	0.3724747051139752	-7.64724	17.39894678296433	17.388613774861668	17.44735151459482	17.42076650931433	17.4523	17.36821085034797	17.33677118991827	17.38449264053984
Patient_vs_Control	A0AAG2TTP8:P62241	LOC102723573:RPS8	-0.0435395	18.61724509711648	-2.71057	0.027987774680800628	0.0428891	-5.34537	18.6304	18.644581994164746	18.63980447864527	18.641271625850212	18.63329113718782	18.5824	18.570610609968703	18.595633716901403
Patient_vs_Control	A0AAG2TVC3:Q6VEQ5:C4AMC7:A8MWX3:Q9NQA3:A8K0Z3	NA:WASH2P:WASH3P:WASH4P:WASH6P:WASHC1	-0.0716561	15.49451864871536	-5.06248	0.00114713	0.00275356	-1.92159	15.533328849554096	15.553624659314403	15.506974568973224	15.527458655996654	15.444790716334431	15.459226650000817	15.471226035709185	15.459519053840076
Patient_vs_Control	A0AVT1	UBA6	-0.104894	20.419433974920253	-4.82388	0.00152991	0.00350311	-2.23683	20.475864797611695	20.52148720697444	20.42369573782997	20.466475704336748	20.34782498845479	20.36476397442077	20.386616973573727	20.368742416159872
Patient_vs_Control	A0JNW5	BLTP3B	0.14145907048227002	19.00993769825907	12.367808184106599	2.6932668275404356e-6	2.452148924526217e-5	4.791345988503899	18.942352047229623	18.93052733642704	18.945013096383715	18.93894017203136	19.067077833092355	19.086507877299297	19.088706781878393	19.08037644173078
Patient_vs_Control	A0MZ66	SHTN1	-0.363651	15.87165743663623	-6.40137	2.6262442223865093e-4	8.192180409543733e-4	-0.297276	16.079857860229808	15.923196351644526	16.15483993383908	16.05603713596203	15.577667058716258	15.747955794238433	15.74832641013543	15.685378948324283
Patient_vs_Control	A0PJW6	TMEM223	-0.0322333	20.936675230449318	-0.584661	0.5757561137009666	0.6273547105250383	-8.06078	20.982184645828937	20.841099571624024	21.035044876639052	20.9528	20.794486861819045	20.98001263788117	20.990964910312627	20.916769941918997
Patient_vs_Control	A0PJZ3	GXYLT2	-0.703246	9.678497495349582	-6.52908	2.3081751259363447e-4	7.356741496982623e-4	-0.154418	9.961414148493974	9.950310052324031	10.15025399395957	10.058504033248784	9.632491365498868	9.242033231653457	9.109188482111003	9.32378
Patient_vs_Control	A0PK00	TMEM120B	0.448432	13.632948321469053	16.416837338928445	3.3748743941447393e-7	6.1608332065112216e-6	7.089777143933459	13.394329551123858	13.375407213072895	13.449123148917275	13.416069225953295	13.921761609362855	13.842014569735111	13.8089	13.85593513709613
Patient_vs_Control	A1A4S6	ARHGAP10	-0.0947536	18.315765175473757	-5.2803	8.881616609238356e-4	0.00223383	-1.64083	18.36611026455385	18.40143927987012	18.326015292129348	18.359002973346353	18.25406845270414	18.2665	18.283222356350464	18.269743097220974
Patient_vs_Control	A1L0T0	ILVBL	0.0990109	16.767856992830005	2.190311772212396	0.0617267	0.0868121	-6.148	16.746993097029925	16.746552397044614	16.672917565426523	16.706943069566773	16.69012267052471	16.853535176185023	16.907319135123227	16.818472831739232
Patient_vs_Control	A1L188	NDUFAF8	-0.271875	7.978053864106027	-8.23182	4.846777771616898e-5	2.1449194720210056e-4	1.5774476889337645	8.12323	8.189376060060411	8.038588776839594	8.104771215325801	7.798952293130788	7.843256931680538	7.881458669319243	7.8448
Patient_vs_Control	A1L390	PLEKHG3	-1.04127	7.343626206738009	-13.5621	1.375764506060442e-6	1.5197931048794775e-5	5.536591773749594	7.903934792214662	7.70047	7.987226104832735	7.865411998791806	6.653237057179627	6.90531	6.915997310900895	6.817421683816602
Patient_vs_Control	A1X283	SH3PXD2B	-0.123446	19.33341811846945	-4.14805	0.00361767	0.0072294	-3.17344	19.39891491074027	19.315593717591604	19.465458423086847	19.400597001396168	19.257597135981424	19.28968369329349	19.2706	19.26892376946969
Patient_vs_Control	A2A376:A0A7P0TB70:O95786	DDX58:NA:RIGI	-0.0988043	21.466263304817893	-2.02842	0.0790005	0.10810890405889077	-6.39125	21.548400644748437	21.5177	21.49144512495238	21.50515341370965	21.27240400868406	21.46300519254222	21.514964737223632	21.417070762610255
Patient_vs_Control	A2AJT9	BCLAF3	-0.0693404	10.527140442843404	-5.13372	0.00105428	0.00256534	-1.82903	10.555679568513431	10.563559496554287	10.564401493154918	10.56360204908845	10.519458074705428	10.483490655041992	10.474426834357292	10.49250537133143
Patient_vs_Control	A2RRP1	NBAS	-0.0716604	19.373823196741302	-2.91208	0.0206942	0.032985881173961375	-5.03192	19.423049024424593	19.43453403120071	19.3777	19.40334048854646	19.27810848613722	19.353054427436597	19.381887128083644	19.3389
Patient_vs_Control	A2RU48	SMCO3	-0.167045	16.393687246515896	-5.3257	8.427365134654962e-4	0.00213966	-1.58315	16.45701227494819	16.504878122425012	16.465668864027336	16.481280269432578	16.39836875656655	16.277104361564653	16.254137279205754	16.311048043957097
Patient_vs_Control	A2RU67	FAM234B	-0.300825	19.38065338479703	-9.93441	1.2995579734354527e-5	7.862173757841087e-5	3.041589007865916	19.512824131749873	19.572421542413572	19.50564402608384	19.533374347398112	19.309379814820502	19.19778272607647	19.182188319083053	19.231612170750793
Patient_vs_Control	A2RUC4	TYW5	0.14740593651636047	14.394187043803363	7.766247327626335	7.225946629184185e-5	2.93914242860172e-4	1.1336425655629885	14.313231230549874	14.35870554233769	14.290417965308205	14.319581563984965	14.498657450326348	14.451526435570608	14.4522	14.46919846318492
Patient_vs_Control	A2RUS2	DENND3	-0.523703	18.869212289196795	-33.6869	1.5585427490273989e-9	2.2244588865376499e-7	12.85879419868234	19.139209430778667	19.126772316194405	19.129424850561165	19.12884809726801	18.571567901753887	18.619603667598422	18.63102678679685	18.607245262622968
Patient_vs_Control	A3KMH1	VWA8	-0.231904	19.785724778959434	-9.04223	2.5232594268430155e-5	1.2884503730634754e-4	2.3033830797745463	19.91748369308093	19.91003460815547	19.88320614884789	19.895982974414295	19.599781878057183	19.690880165734573	19.718295773741072	19.670132989644067
Patient_vs_Control	A3KN83	SBNO1	-0.0442194	14.676808143196324	-1.24157	0.2514324310077351	0.3016952271299736	-7.4563	14.6773	14.670782195326238	14.73946579544161	14.708090940307343	14.750811839415316	14.628530182202956	14.58583131864206	14.653620445281764
Patient_vs_Control	A4D1E9	GTPBP10	0.18448251438186603	16.548286508028824	7.9820323681697385	5.99083180372604e-5	2.5251793135397236e-4	1.3419096444423193	16.470159076014927	16.43656919943495	16.464239954678213	16.453212773223466	16.578896401063233	16.663652361595048	16.679656835573507	16.63990546264724
Patient_vs_Control	A4D1P6	WDR91	-0.23868	16.756748089307063	-6.29582	2.9260970369130183e-4	8.887837172853103e-4	-0.416853	16.852949260089748	16.846383073545432	16.919136893707876	16.885883354301768	16.740423992488726	16.60928414549517	16.563655584589593	16.636268410238195
Patient_vs_Control	A4D1S0	KLRG2	-0.625568	16.68565882300431	-8.85225	2.927172920699224e-5	1.4442038288476846e-4	2.1382120163629725	17.030416334658003	16.832212460307563	17.128910388383787	17.002232110214013	16.237166775695528	16.444652404074052	16.442494086809663	16.36718602389186
Patient_vs_Control	A4D2B0	MBLAC1	0.15469910988584523	16.029632615953943	4.696218273673952	0.00179075	0.00398295	-2.40881	15.934172781526916	15.91307109379231	16.00060466285142	15.96128370587344	16.18812179160327	16.08750509715327	16.046770948704975	16.10553084612595
Patient_vs_Control	A5D8V6	VPS37C	0.22785073778539555	16.593472725361018	11.983341739414005	3.3862392591823968e-6	2.9089787141823363e-5	4.537044833082263	16.489759905634294	16.455825673976907	16.494301218665484	16.47830262759659	16.66311105331473	16.725659809658808	16.734211137975695	16.70661037606562
Patient_vs_Control	A5PLN9	TRAPPC13	0.21539053301954425	19.855205091152733	8.941286241841738	2.7294870271398348e-5	1.3660530686891758e-4	2.215990578679831	19.75911383831147	19.78086868869776	19.709002250877266	19.741054520685353	19.910647021614952	19.974072549984175	20.00276303159368	19.964118827457213
Patient_vs_Control	A5YKK6	CNOT1	-0.00821555	18.736597571009817	-0.399264	0.7007090147105963	0.7445543110327087	-8.16065	18.753119258000066	18.733882647701968	18.73846697753141	18.737352504747484	18.677951296808192	18.751192337768764	18.768511895484437	18.732303650036226
Patient_vs_Control	A5YM69:Q12774:A0A2R8YFR7:A0A5F9ZGZ6	ARHGEF35:ARHGEF5:LOC107987545:NA	-0.19838	11.02673094768277	-7.29639	1.1030520720523228e-4	4.068663074190557e-4	0.6639949378148557	11.122589614747806	11.05782640705542	11.190602563628548	11.132665082978615	10.944416631428211	10.933626310248474	10.90698041227886	10.925140559096224
Patient_vs_Control	A6ND36	FAM83G	0.13346831107422652	15.473696189903567	1.9445303693235936	0.0897348	0.12107238687017358	-6.51516	15.454060682754422	15.391539606955128	15.388881079551552	15.393366768204707	15.333174904592004	15.609726660812823	15.678729056271353	15.54009076008654
Patient_vs_Control	A6NDG6	PGP	-0.106787	17.973899579357877	-3.38489	0.0103653	0.017960928203324657	-4.30342	18.006658559881014	18.047150610019724	18.02320822813435	18.032154068220404	18.010886908732218	17.88806654801756	17.86195754895324	17.921114162904516
Patient_vs_Control	A6NDU8	RIMOC1	0.17388515408654648	13.483350440418832	2.2285789490649117	0.0582249	0.082411	-6.08984	13.348880425822786	13.320186575889128	13.498766157029374	13.417798294760946	13.782375706049695	13.514941208598676	13.416435820130442	13.5674
Patient_vs_Control	A6NEM2	HCFC1	0.0827532	16.093071371729593	3.6851331484843537	0.00678257	0.0124846	-3.85068	16.041031109218697	16.02125934798014	16.086880037760327	16.057608541172428	16.1825	16.124146206297713	16.097849988221036	16.13333597047479
Patient_vs_Control	A6NF01:A8CG34	POM121B:POM121C	-0.0624458	16.354234982494408	-4.22474	0.00326992	0.00663065	-3.06395	16.379050405176905	16.37368360781453	16.40063064704278	16.38846691668144	16.35165234648312	16.315787671712815	16.302036121948078	16.3226
Patient_vs_Control	A6NF51	BPNT1	-0.333394	13.36097316851687	-4.5784	0.00207513	0.00449632	-2.56959	13.482561116634052	13.463585004911495	13.617252957547477	13.547282195848704	13.395303219172758	13.14042921535154	13.049533713183594	13.191837925485336
Patient_vs_Control	A6NFI3	ZNF316	-0.224239	9.52269	-4.83653	0.00150642	0.00346235	-2.21991	9.636328505589828	9.506326748076363	9.751518187694684	9.645070088118157	9.407994058563542	9.433129453163597	9.39509	9.40608
Patient_vs_Control	A6NFQ2:A0A1B0GVM2	TCAF2:TCAF2C	0.18107004472053845	13.753803427001943	1.731128400700981	0.12375270349206381	0.16084767548932893	-6.82179	13.59094575814968	13.708645026965112	13.671151379875408	13.68233145357649	14.161895931440764	13.73448490622388	13.635352821097989	13.84562013868622
Patient_vs_Control	A6NHL2	TUBAL3	0.6138256966094033	25.43645338808068	2.778455637832374	0.025271208372112813	0.0392618	-5.23973	24.97969777660287	25.34394757961973	25.03554272866879	25.158974074212516	26.39744559945988	25.49664605659991	25.32913268229873	25.7502
Patient_vs_Control	A6NHQ2	FBLL1	-0.553212	13.835880731258877	-11.8002	3.785510289361286e-6	3.199281959828254e-5	4.413207836258614	14.143226828648965	14.12878504743126	14.076525411076927	14.101410052716949	13.42316010313365	13.600315805221854	13.65364574750534	13.559976854336067
Patient_vs_Control	A6NHQ4:Q13488	EPOP:TCIRG1	-0.158989	18.27616715023639	-3.90625	0.00500382	0.00957492	-3.52379	18.378240750983327	18.40632974148909	18.293784929604204	18.344291272815024	18.09545438258476	18.22067303869665	18.272018624324613	18.198544461393467
Patient_vs_Control	A6NHR9	SMCHD1	0.2350928551584346	22.983570828216006	3.8239463953923725	0.00559899	0.010553380649855922	-3.64477	22.8241	22.87364965315933	22.88773725480861	22.878647950326908	23.28596350041336	23.040350082286373	22.976949925767883	23.101205514713296
Patient_vs_Control	A6NI28	ARHGAP42	-0.311679	10.370091929815482	-12.6961	2.2263516300021265e-6	2.1390552108257275e-5	5.002704320225558	10.5124	10.502791911007504	10.556421567989492	10.532155273075706	10.274872830168732	10.198660035323645	10.17009379395646	10.213383879226413
Patient_vs_Control	A6NIH7	UNC119B	0.11701655341354567	14.79842177664715	2.3527325424844614	0.0481757	0.0695353	-5.89985	14.772204166101504	14.68134372935762	14.77150190761351	14.734604196688874	14.716374057236102	14.912061193809176	14.94426964214904	14.855015320221373
Patient_vs_Control	A6NK59:Q9NRR4	ASB14:DROSHA	-0.317541	8.920733829872553	-12.9631	1.9132149708764767e-6	1.905906646294684e-5	5.170904475045951	9.090862664316424	9.11604	9.038252293021309	9.072860770117831	8.710691092147282	8.772282757946922	8.80159	8.76329
Patient_vs_Control	A6NKD9	CCDC85C	0.17656602577459424	14.065490896833976	8.559637334298072	3.699030035993619e-5	1.7403554976047297e-4	1.8779223849497857	13.988282361583934	13.947996884949626	13.996402722307838	13.976149566945317	14.105860805190046	14.174130669657082	14.182306656941453	14.152797507096512
Patient_vs_Control	A6NLN1	PTBP1	-0.136159	14.676672818089154	-6.60184	2.1462668024848307e-4	6.907025205704819e-4	-0.0739041	14.750848970503654	14.785585315739697	14.70316280976594	14.739413098894763	14.580393999353722	14.610761480431488	14.633166895112437	14.61004997491153
Patient_vs_Control	A6PVU8	TUFT1	-0.0588189	15.972935161567785	-1.08142	0.3127044249712157	0.3673962527980397	-7.63479	15.979168843981574	15.897034363274235	16.114704616670615	16.018470617958343	16.049126427416315	15.927355635766077	15.857884261170312	15.9397
Patient_vs_Control	A7E2V4	ZSWIM8	0.024612491126848823	18.162551345124314	0.8629285052379416	0.4146395910304609	0.4708706522090864	-7.84816	18.15980270215901	18.080589327235423	18.20754181023833	18.153046558610807	18.134931019312425	18.19948410545847	18.192557811057775	18.17245742692228
Patient_vs_Control	A8K968	EPB41L3	-0.24923	14.123473053420469	-1.36416	0.21163494772265137	0.2580758831447562	-7.30875	14.14000084036511	14.037689143726414	14.514830955029788	14.299831592673652	14.482365299634694	13.878860935647214	13.643181576039185	13.991024084247687
Patient_vs_Control	A8MSI8:J3KTA2	LYRM9:NA	0.25659089519464473	14.157416383239768	4.965908004350236	0.00128767	0.00303469	-2.04821	14.053642185755557	14.118445505012318	13.930490232039658	14.013905819762254	14.17468837735364	14.306330092978037	14.372882278455126	14.288946574561562
Patient_vs_Control	A8MTT3	CEBPZOS	-0.353972	21.367538908928847	-16.2091	3.7080128022305585e-7	6.415725808430976e-6	6.986043966672987	21.554143330929264	21.57730629548567	21.50790457209921	21.53874532596964	21.147076311214093	21.198998713013857	21.224394019217375	21.191742703501653
Patient_vs_Control	A8MXP9	MATR3	0.2975160748636583	15.040288631679218	1.031164994400779	0.33423380997904806	0.38943278769219863	-7.68713	14.70386533746396	14.70825210564181	15.187849117400791	14.966155816482996	16.022699128727165	14.95179768347264	14.599866079551251	15.181823784693131
Patient_vs_Control	A8MXV4	NUDT19	-0.621364	14.431825698081042	-17.5473	2.0608146748941532e-7	4.505409807208715e-6	7.632393181577781	14.76603249156896	14.735035816771774	14.73326410824701	14.735697511169626	14.017615769848954	14.155719521709711	14.190257953061918	14.12098241227038
Patient_vs_Control	A9UHW6	MIF4GD	-0.262362	9.629882824165753	-7.43144	9.74675632192135e-5	3.687360816679948e-4	0.8013241798412807	9.782638742284975	9.711580655695125	9.791654758536357	9.75838	9.40512	9.53718	9.555444519219163	9.497059673494608
Patient_vs_Control	B0YJ81	HACD1	0.2167634080886387	14.01176012428629	5.577354776686819	6.33113204352694e-4	0.00168109	-1.26856	13.919705795700317	13.811887491848564	13.976054921805682	13.905865471613328	14.051053673838815	14.157844136216934	14.15466413009892	14.117005373167766
Patient_vs_Control	B1AHL2	FBLN1	0.16652543910212358	25.367319154275147	1.763966315672277	0.11781895089050012	0.15406768972106588	-6.77553	25.26281977633667	25.044865083214894	25.517781347332573	25.310759532012213	25.551918283449034	25.45842439349815	25.34987541076007	25.442109407597577
Patient_vs_Control	B1ALY0	PALM2AKAP2	-0.170061	17.388575001008707	-7.08564	1.3428018725542668e-4	4.7413632850054426e-4	0.4458019822724939	17.487361334591682	17.491373496912406	17.447914376645155	17.467773523370628	17.24229969994581	17.320246206391985	17.34740575717301	17.30422561303898
Patient_vs_Control	B1ANH0	GUK1	0.025215161258053342	17.912270062391638	1.7965712141934662	0.1121939744452023	0.14742494176693668	-6.72924	17.90599182818064	17.90503825472816	17.890406896921032	17.897212947220613	17.896787031626847	17.933007222703594	17.94462330116561	17.92509301658661
Patient_vs_Control	B2RTY4	MYO9A	-0.012348	12.38940593503536	-0.380274	0.7141740506310261	0.7562208407348829	-8.16886	12.40404659254486	12.31095073637072	12.46734478985713	12.399977665254156	12.348597185543005	12.408687834962508	12.395340276961043	12.38030239878946
Patient_vs_Control	B3KNS4	ERVK3-1	0.0987238	12.749650016662644	2.71358	0.027861352568670106	0.0427133	-5.34069	12.703423851098371	12.60072556364586	12.789384385991696	12.707618674180022	12.788369943290238	12.819273072458069	12.792868291674656	12.79553635096224
Patient_vs_Control	B3KU38:P0DPB3	IQCJ-SCHIP1:SCHIP1	-0.0996499	12.163511908891438	-2.96136	0.019232656905542725	0.0308381	-4.9554	12.191270418348278	12.212820088391924	12.228903356839906	12.22035356501848	12.211037346561096	12.082450075229476	12.047685673856051	12.1136
Patient_vs_Control	B4DDD6	DBNL	-0.0735935	17.298671326003202	-1.84274	0.10466345653004223	0.13867765552211367	-6.66312	17.33229274757578	17.228855156019954	17.435342043650717	17.34538234803661	17.279296198667247	17.274298038346977	17.23577903882406	17.25812503690428
Patient_vs_Control	B4DEV8:P25786	NA:PSMA1	-0.0573177	18.583858397829687	-2.54685	0.035852370146812855	0.053253459481698025	-5.59985	18.616234201607313	18.66511481767851	18.561773479098832	18.606946433217512	18.537119213718672	18.55212253083939	18.57449793324747	18.557058573229792
Patient_vs_Control	B4DH19	NSF	0.00573344	15.248876705233949	0.0863065	0.9334584210432797	0.9469248239794372	-8.24566	15.288581651430398	15.28942796058049	15.177102910504102	15.228927425007914	15.062571254758426	15.305270682008222	15.3857	15.253446456307833
Patient_vs_Control	B7Z1P2	FBXO44	0.2290015783114221	13.296465822158211	7.9167737780429235	6.33749251640674e-5	2.624865022960977e-4	1.2794009631556893	13.20063114358635	13.162456023261718	13.187076284809772	13.177696680352163	13.329256425976649	13.440557510915696	13.463689940839116	13.41036256752422
Patient_vs_Control	B7Z4M1	RTN3	-0.249763	10.886642506301872	-8.56173	3.692760645746744e-5	1.7385259984037865e-4	1.879808780401076	11.028043262257604	11.04060556286058	10.97357398079354	11.003872682898104	10.68796337607246	10.780588956244369	10.81564154043344	10.762850688854872
Patient_vs_Control	B7Z7F3	RANBP3	-0.17317	11.510318822382821	-1.07172	0.3167751739071032	0.37170051741437693	-7.64504	11.693732106004372	11.773527116857814	11.368815109014353	11.551541755039755	10.990972076033357	11.53311407669174	11.74051243991374	11.43033589950744
Patient_vs_Control	B7ZAQ6:P0CG08	GPR89A:GPR89B	0.2917850412960661	21.754331287187433	9.77531	1.4571402305862042e-5	8.565636457559991e-5	2.9142530081232856	21.604164793212544	21.688103196958004	21.53835605210198	21.60313102388508	21.916523949497805	21.881506978436256	21.89986706922135	21.902997234186454
Patient_vs_Control	B8ZZC5	GLS	-0.387416	16.569737969056273	-10.4306	9.186040645030933e-6	6.064780179929103e-5	3.42754	16.78763909747268	16.772727609885916	16.738393027412496	16.75502484950022	16.269018693329837	16.408893001910734	16.4497	16.376458212731908
Patient_vs_Control	C9J0J7	PFN2	0.1219981206291827	18.423520619904195	3.083992351827598	0.0160457	0.026270343222564687	-4.76542	18.352322766845372	18.467802224575525	18.27301607324861	18.356945173688914	18.52613323249258	18.453325864127983	18.470454123857756	18.488165500396825
Patient_vs_Control	C9J2C7:Q9HBH5	NT5C1B-RDH14:RDH14	-0.206279	15.524813622263625	-7.10883	1.3137692926618044e-4	4.656865716027425e-4	0.4700448496593257	15.643839069445765	15.660744337842267	15.587036958520638	15.620192042418154	15.350551531828808	15.439013861589064	15.47424019453016	15.422890981934154
Patient_vs_Control	C9J406	IMMT	-0.240045	17.04468753853974	-7.79449	7.049138240028814e-5	2.885247053177713e-4	1.1611623890751588	17.18488055194317	17.15731855905399	17.15768713110269	17.158953225657964	16.83593023029332	16.954467255976844	16.98377113506243	16.924492219227517
Patient_vs_Control	C9J4A7:Q8TD55	NA:PLEKHO2	-0.0315049	17.994409940413714	-1.76528	0.11758644562199581	0.15381874344890958	-6.77366	18.0039	18.046158099931876	17.98146150067915	18.009134259714195	18.00514648139278	17.964046988529265	17.965544367793786	17.979892159838556
Patient_vs_Control	C9J542	PDLIM4	0.44889399266901364	21.96003186603647	9.374142710676134	1.9588996055755734e-5	1.064277151779229e-4	2.585032746987336	21.732736041596056	21.605431548428648	21.85680839953835	21.7474	22.2012	22.20110395515068	22.15569124492361	22.17990579522892
Patient_vs_Control	C9J6N9	UFD1	0.2504942586241192	19.967146462528564	16.18839246286285	3.743246229849649e-7	6.415725808430976e-6	6.975620019372885	19.83604123311473	19.867716867363868	19.8222	19.841592780304527	20.117406258472663	20.079979333512597	20.078915451105743	20.09327332427149
Patient_vs_Control	C9JBE1	DNPEP	0.035991088163086715	18.873237028311586	0.5812529661492759	0.5779362321073478	0.6289255390235251	-8.06293	18.83368265737048	19.0157	18.722982832637847	18.84864723772352	18.981188432178985	18.83516058101747	18.851819391201143	18.896761885174925
Patient_vs_Control	C9JDQ1	MOGS	0.4232967699432457	26.828312081937963	4.91095	0.00137602	0.00320603	-2.12086	26.560505336957306	26.726913710602645	26.55403946262517	26.62519627768023	27.284139909803702	26.942746992414012	26.889370538877596	27.043584426543035
Patient_vs_Control	C9JFK9	BAG3	-0.358406	7.080035731853118	-5.50779	6.846194177002147e-4	0.00180046	-1.35465	7.214787780139741	7.30098	7.251386700301891	7.269796997175714	7.095565366679696	6.831114917679605	6.774545293028206	6.902106203386414
Patient_vs_Control	C9JI87	VDAC1	0.2629735911404687	30.903194836892013	2.178679002189184	0.0628322	0.0881801	-6.16563	30.688147224670377	30.823860953919116	30.781067737168996	30.79375624952862	31.401592972215575	30.907801648121147	30.793179054954724	31.03615285455755
Patient_vs_Control	C9JLW8	MCRIP1	0.22187614730339433	18.37433942885502	7.272135689086892	1.1280451032884391e-4	4.132958025194271e-4	0.6391324367291613	18.274944270935375	18.190792894700795	18.32204605864324	18.265822196533897	18.436688417449425	18.513190665903448	18.508448591377228	18.48278233529676
Patient_vs_Control	C9JNG9	COL6A3	0.602596	14.518708043159466	6.040894461094252	3.819881214674483e-4	0.00110645	-0.711399	14.157767404343216	14.109185165618095	14.357383259091446	14.245303893418596	15.086553082956152	14.752541548127136	14.624970671400355	14.815959320320731
Patient_vs_Control	C9JRP1	SLC4A7	-0.0535751	11.426474770161422	-0.832348	0.4306490496618275	0.48647886148370423	-7.87494	11.4114	11.418306482979334	11.513898257529464	11.469399068969016	11.585258966421158	11.34588745139066	11.2693	11.398283950688937
Patient_vs_Control	C9JW69	RCC1	-0.5822	12.823100213157351	-36.1651	9.12632620106559e-10	1.8511231644494707e-7	13.404988098707282	13.110916360522117	13.148526233327608	13.084989526571292	13.112369130161824	12.545385783899702	12.521888211725456	12.527537478750917	12.533188980299894
Patient_vs_Control	C9JW96:P35232:A0A8I5KWR0	PHB:PHB1:TFCP2	-0.183792	18.994953608585963	-8.73917	3.201740351073647e-5	1.547260624986087e-4	2.0384890485482714	19.093312727592703	19.03850857300712	19.126729837449727	19.08884760066849	18.87609805840365	18.91990714792575	18.914833829699596	18.901391093940664
Patient_vs_Control	C9JZI7	NAP1L4	0.4141866305421402	19.485693073782574	10.829959050583982	7.02115644339311e-6	5.031254597611039e-5	3.7264669157257337	19.29468765476419	19.188789522266564	19.349899839690572	19.28102201732468	19.62470072160999	19.72988190841372	19.72685511767003	19.689707808520847
Patient_vs_Control	C9K055	PCYOX1	-0.645091	9.50468	-20.7831	5.848488804332953e-8	1.977590800571751e-6	9.009455646145884	9.813042099249936	9.894411419790403	9.77535	9.826089804209952	9.242534839706645	9.151335612421043	9.150234710509189	9.184426997424998
Patient_vs_Control	C9K0E8:Q07283	DDX11:TCHH	-0.0340969	11.294183473618297	-1.41853	0.19580811156666314	0.24070552704710005	-7.24059	11.31249825383978	11.24926455000736	11.367153827905412	11.31601099369946	11.273534428597005	11.288772831690242	11.271263962572252	11.274968940634864
Patient_vs_Control	C9K0J5	RAPH1	0.15019607341821484	9.88804	3.428545848404638	0.00973796	0.017019288119723364	-4.23702	9.791001832279669	9.905719598721404	9.74293	9.812123244295726	10.056950739812672	9.917264808321194	9.912045542077363	9.966297095704036
Patient_vs_Control	D3YTI2	ACP1	-0.469558	8.289282851481046	-30.5015	3.2931695890350613e-9	3.294071827278633e-7	12.083633351530597	8.516474478209933	8.51781	8.53498	8.526982004778713	8.088171598095299	8.04473	8.030863797637346	8.05425
Patient_vs_Control	D6R9V8	CDV3	1.82206	29.62980116958411	11.288296168887596	5.2129281963567625e-6	4.02802134283567e-5	4.0575866379239205	28.60702136755242	28.75327482494022	28.76359195570179	28.75120633243848	31.0327	30.376739667027515	30.212357658612525	30.541561152856723
Patient_vs_Control	D6R9W4	DBN1	-0.179935	16.173925432270163	-1.68706	0.1321585487650177	0.1706191165279631	-6.88327	16.192824416824923	16.383151980840328	16.203211395585587	16.276384790870726	16.39361736323182	15.964151314538087	15.890228412047708	16.08783378422214
Patient_vs_Control	D6RBQ9	HNRNPD	-0.199437	7.372185274169638	-3.70236	0.00662202	0.0122291	-3.82499	7.4367	7.448078245320591	7.517814087438326	7.485019284247432	7.428493640003115	7.2262911317888765	7.1636	7.271481537099147
Patient_vs_Control	D6RDP1	SEPTIN11	0.5234329638996886	7.961143897784248	22.295628236394826	3.460021317151496e-8	1.4114567406614651e-6	9.57889	7.695028076507248	7.644825676498764	7.752474540678779	7.705381369652825	8.24401	8.225287182610288	8.201211275725992	8.220928228319593
Patient_vs_Control	D6RE77	RAPGEF6	-0.257568	6.19762	-5.05343	0.00115956	0.00277701	-1.9334	6.360765773509593	6.327256777500947	6.302112247865454	6.315469496617818	5.917224762070909	6.11747	6.171626584120329	6.069009486907858
Patient_vs_Control	D6RIF6	SLAIN2	0.2888873701927466	16.765183200942424	9.961699437272593	1.274502887415657e-5	7.736010044812241e-5	3.0632483019209324	16.62941706370372	16.684115212852483	16.556725574415402	16.612700212412598	16.869320413245344	16.911878843821665	16.94542354196012	16.911884745128066
Patient_vs_Control	E5RI56:P63208	NA:SKP1	0.0316439	11.04057305321765	0.7442448122982606	0.47915815874892187	0.5339253586425496	-7.94752	11.005616386518938	10.948292224132148	11.107907242684991	11.03718865597854	11.14324667816275	11.041378725267164	10.987320459135711	11.053634053860948
Patient_vs_Control	E5RIH3	PSD3	0.21246333197351142	10.137233523971105	1.9958451988475667	0.0830113	0.11285442693056097	-6.43956	10.05272810920108	10.305278037484651	9.764789666484331	10.001211618767332	10.138845242018553	10.23074605456966	10.351100253593769	10.253169209649457
Patient_vs_Control	E7ENQ6:Q9P0J0	NA:NDUFA13	-0.179275	18.05191597788096	-3.45159	0.00942329	0.016544576808393777	-4.20205	18.176085293168995	18.15421094308363	18.1063	18.12958243944319	17.809554464959533	18.009279950201368	18.067410726405488	17.962869477772866
Patient_vs_Control	E7ENX8:Q03519	NA:TAP2	-0.463219	18.886949156362622	-12.4683	2.5395785705213973e-6	2.3443745539756313e-5	4.856583826361371	19.141727550718898	19.142162141238195	19.081081118744372	19.109264006814787	18.55238696363293	18.684474963834976	18.728230964327135	18.656265541589672
Patient_vs_Control	E7ETU9	PLOD2	0.0776575	22.88047769388756	2.4279188012484307	0.0429595	0.0628134	-5.78399	22.862110223010617	22.85083481075755	22.819235749311044	22.83441490250092	22.828758528562403	22.946888514188046	22.981863198923424	22.91971562384648
Patient_vs_Control	E7EUA0	NEXN	-0.229425	4.464215732833049	-8.18863	5.025728638044583e-5	2.2093841369657762e-4	1.5371441440519842	4.581092688184441	4.6509522331626325	4.511443186624703	4.572224153854377	4.337648015955294	4.341138164608136	4.367190870694877	4.352036549579928
Patient_vs_Control	E7EV59	ATP6V1C1	0.0887611	18.803657968678316	1.4602840853115309	0.18437571782088533	0.22803378921546488	-7.18722	18.73600092043175	18.912366710915663	18.6349	18.753838017990265	18.945805526341637	18.79069143001749	18.802353196712097	18.853303904253128
Patient_vs_Control	E7EX44	CALD1	-0.0879076	11.769039905989017	-1.90074	0.0958867	0.12827137545702813	-6.57916	11.781740599783015	11.82024304546522	11.82772665201951	11.822264516389652	11.862709566855298	11.679577304097316	11.632850700900065	11.725206862402056
Patient_vs_Control	E9PAM4:Q9BTU6	NA:PI4K2A	-0.267662	18.408572501672364	-7.16016	1.25195147420959e-4	4.4826231866365243e-4	0.5235059039811727	18.555681614149332	18.62125664731863	18.461058525755533	18.5316	18.213645665138056	18.28106567919704	18.326693910310784	18.277561561639125
Patient_vs_Control	E9PAV3	NACA	0.087374	16.51407283112563	1.7383755374075196	0.12241944891304536	0.15945537209473015	-6.81161	16.48087592945608	16.332295294343275	16.58975968480367	16.47861244356349	16.515912461508734	16.594577313579006	16.567584020719195	16.552965501031593
Patient_vs_Control	E9PC44	SEC24D	0.19200689847576768	23.363753216749515	3.478847244944568	0.00906491	0.0159923	-4.16074	23.23460350389687	23.21284181023814	23.34073973350695	23.28281402240456	23.607722008170803	23.42143151902514	23.352181947345727	23.45769118940794
Patient_vs_Control	E9PCH4:Q8TEU7	NA:RAPGEF6	-0.0846322	12.953192773085622	-1.46494	0.18313758629429555	0.22668242280920273	-7.18121	13.033672654638885	12.933065258727009	13.026630277330987	12.98866730790364	12.744538799737166	12.974958705721418	13.015157945513824	12.908851235112044
Patient_vs_Control	E9PHB8:Q9UJ41	NA:RABGEF1	0.11970695904593498	18.6331	7.077383263111243	1.3533156446763543e-4	4.769261987175067e-4	0.43715221505613044	18.56578764340921	18.60029672753663	18.553611473777032	18.57337112624766	18.72509766375602	18.67806621738983	18.67484191723131	18.693889008777113
Patient_vs_Control	E9PIE4	MTCH2	-0.119729	16.447735241918146	-2.64889	0.030718401141519733	0.0465461	-5.44133	16.538013397669122	16.47740543316799	16.514468165075623	16.50051197467366	16.25468510501205	16.435831791631028	16.474023713275276	16.38694235484043
Patient_vs_Control	E9PK54	HSPA8	0.1461872479091042	17.992563833823144	4.041813387363086	0.00416736	0.00817151	-3.32642	17.941448913924397	17.947810840747934	17.878465398029007	17.910155686773034	17.967802704348365	18.09235137168976	18.135731435688452	18.066744319384195
Patient_vs_Control	E9PK91	BCLAF1	0.10160765743933808	13.4225	1.5428422195123042	0.16351114315029538	0.2051002618536412	-7.07917	13.328136194219969	13.34548905786062	13.425391926176792	13.387590700543551	13.666043436364092	13.415652273586328	13.33918556726775	13.472157231340104
Patient_vs_Control	E9PKP7	UBTF	0.2147300509215384	19.111015127336795	5.008376621115876	0.00122367	0.0029067	-1.99237	18.97766119183072	18.9661	19.05586266077027	19.015003971521903	19.334219612559004	19.187461368473947	19.13488712600875	19.21695250414856
Patient_vs_Control	E9PKQ5	CCDC90B	0.24852536517742863	18.342779847581298	3.7031052774394504	0.00661521	0.012219646781665509	-3.82389	18.173759446867003	18.28771833899535	18.185713104468174	18.22687776963981	18.662249411307663	18.39252859892024	18.34411546168046	18.46927664877168
Patient_vs_Control	E9PLP0	CARS1	-0.00646698	14.713548309375684	-0.384161	0.7114087084220715	0.7537789080072843	-8.16721	14.713805568234685	14.682571821251466	14.750168146828956	14.720581654856913	14.72453874860174	14.711523220257178	14.69609399490177	14.709103320072757
Patient_vs_Control	E9PM92:O00193	C11orf58:SMAP	-0.193185	9.732775995089245	-8.31115	4.536301649594124e-5	2.0358988718707007e-4	1.6510453560021432	9.818451845571946	9.796443829856436	9.86701	9.83557	9.685390919112846	9.625917979909277	9.598441975579185	9.634983195410268
Patient_vs_Control	E9PMS6	LMO7	0.5672461833315694	23.91995761005679	8.77196	3.119268778628609e-5	1.5204873579136252e-4	2.06751	23.597223581491264	23.572414601805768	23.721662912293866	23.65403697797312	24.3781	24.1582	24.07678324551691	24.201173985141185
Patient_vs_Control	E9PNX1	SERPINH1	0.022755670765643998	16.014085088958247	0.38409600098781166	0.7114549758951252	0.7537789080072843	-8.16724	15.967921756048309	16.106439496750532	15.931437495958226	16.005030265544633	16.17557666508476	15.95961903064104	15.937706370685085	16.02894963095338
Patient_vs_Control	E9PP27:Q15293	NA:RCN1	0.22935848011618631	15.556483516573179	3.1342787232187947	0.014904187140373224	0.0246496	-4.68776	15.404939056652156	15.322407761937823	15.576436470920813	15.463433816549546	15.837598151986464	15.637800115674274	15.54243118901303	15.66682156985132
Patient_vs_Control	E9PQ68:O95169	NA:NDUFB8	-0.125813	15.951901856057308	-3.77821	0.00596237	0.011134833605350412	-3.71236	16.034566366476287	15.964460577577608	16.047433433526063	16.01277215523466	15.803456039779045	15.925033714136566	15.94017703366626	15.887315528061981
Patient_vs_Control	E9PRG8:E9PLD3	C11orf98:NA	0.17048490273156247	17.282223257037035	5.1336955313719015	0.00105431	0.00256534	-1.82906	17.179201795129572	17.154257121482132	17.248294032132865	17.206170273940455	17.447256621055185	17.349016468636933	17.307697007441682	17.36589273647747
Patient_vs_Control	E9PRZ0	MAP2K3	0.7128422037759705	24.6053	14.984502053590035	6.618629451406912e-7	9.27935556126253e-6	6.346510479874604	24.218661349402367	24.31169232143819	24.21195888866751	24.25316507920881	25.09294509825759	24.90886091856068	24.881256167548003	24.963784269454468
Patient_vs_Control	E9PSI1:O15321	NA:TM9SF1	0.034054881088081856	17.287033979025143	3.0706151367778998	0.0163646	0.026738539449306823	-4.78611	17.2695	17.258248655493748	17.28113949681112	17.271154593714947	17.306745592928138	17.305186099401023	17.300666824769856	17.303647161177704
Patient_vs_Control	F5GY03	SPARC	0.5856888211375662	19.489018971784706	5.30855	8.595829978150443e-4	0.00217266	-1.6049	19.151412322109316	18.969087450097547	19.434897857385614	19.229300615271235	19.98658204699309	19.75439382770506	19.612762901336563	19.773714753379235
Patient_vs_Control	F5GYF8	SIPA1L1	-0.00969876	18.280332237055944	-0.307503	0.7667372409938668	0.803605	-8.19672	18.267949232929972	18.34148578982135	18.245369942728157	18.28592151087145	18.349690198289355	18.242083745795572	18.232775062769925	18.27738241324178
Patient_vs_Control	F5H136	TCP1	0.47020490339436094	26.11220957111572	21.680751270397078	4.264631658671968e-8	1.6143589635417952e-6	9.352433891479247	25.88734342154342	25.906034947282457	25.843595714551107	25.87145439429719	26.30123353803176	26.357246670654632	26.382398497991133	26.34836938457407
Patient_vs_Control	F5H8B7:Q96C57	C12orf43:CUSTOS	0.23110138450094908	19.750108705837622	15.552604215632554	5.031640336745898e-7	7.734955313456536e-6	6.649331173678805	19.627275834888835	19.645846464780615	19.629193898721745	19.635915855957407	19.897419047242053	19.853531170493568	19.84566345488859	19.866023919728175
Patient_vs_Control	F6V2D4	LGALS8	0.108627	16.031708787910347	3.4985338454092965	0.00881517	0.015630975102857145	-4.13095	15.995784126647283	16.003065685663053	15.941292313701034	15.969438105345542	16.00408698118941	16.108045652526677	16.144956931020175	16.08700050718961
Patient_vs_Control	F8VQD4:Q8TAD7	C12orf75:OCC1	-0.38588	18.555435144712508	-6.39805	2.635138070829349e-4	8.192571913181937e-4	-0.301016	18.707215632941796	18.784955817207493	18.74300351910163	18.758324794545945	18.542874861657587	18.298268775991303	18.245236045209484	18.363601711044826
Patient_vs_Control	F8VZ52	DNM1L	0.018310828014080016	21.599385321967052	1.3336227898401432	0.22100189350058744	0.26842245947127236	-7.34632	21.592450729137873	21.613334599983737	21.56753733603711	21.58759696668134	21.59800463959283	21.60802371096451	21.61877473666215	21.609359856676857
Patient_vs_Control	F8VZX2	PCBP2	0.1312213842723544	15.64379643484136	1.640597687959835	0.14159413171848298	0.18119879947570325	-6.9473	15.531285576744276	15.485930222492334	15.694809075660489	15.600718095923618	15.919236625543927	15.657491853878795	15.554925790925685	15.705974237561747
Patient_vs_Control	F8W1E0	PXN	0.0336935	31.165398972588967	0.5683116125495199	0.5862568187706664	0.6366518873681448	-8.07099	31.187487341363756	31.17388784730653	31.098703438842875	31.134130216647694	31.00969339767799	31.233483139169536	31.302506794372903	31.18329960533047
Patient_vs_Control	F8W6C2	SPATS2L	0.0904345	14.662287490549058	3.5255415880927163	0.00848445	0.015125348175313665	-4.09015	14.633422110365473	14.608070118693238	14.614133842267783	14.612654906575226	14.635665894713904	14.732142204922866	14.75495176417649	14.707259082677483
Patient_vs_Control	F8W726	UBAP2L	0.14225569390252701	17.639138071913507	7.458952306438634	9.506219078000203e-5	3.6040712205377717e-4	0.8290640776176694	17.56978748516443	17.61198475313064	17.52649552034298	17.563773141210934	17.701017762644636	17.705805201693227	17.722426228691337	17.711814482429887
Patient_vs_Control	F8W7U0	ITSN1	0.23327579542114663	13.796761804516452	1.2183552282836245	0.259643	0.31024544293480677	-7.48321	13.551489528674605	13.61500279768186	13.827785015687953	13.726218285179092	14.482884978568295	13.741169904909729	13.518974815493111	13.910569109936969
Patient_vs_Control	G3V1N2	HBA1	0.4111416982446272	39.50878004537864	2.6199980302357018	0.0320903	0.0482884	-5.48625	39.378570680561694	38.94291250291325	39.58184651796659	39.309507083583746	39.39347799478529	39.87852700158835	39.88335205253911	39.70204652909109
Patient_vs_Control	G3V325:O75127	ATP5MF-PTCD1:PTCD1	0.15496272117997378	18.80902334465464	2.681479344029522	0.029243071720755583	0.044569590838020715	-5.39063	18.73355948238623	18.569906983152233	18.878287476313055	18.744413994407093	18.882783744397067	18.915035900023135	18.867349987115418	18.880849189442884
Patient_vs_Control	G3V3Q6:Q8N806	NA:UBR7	0.38952226421320546	16.371343465459415	7.46581	9.44731162569031e-5	3.5848389986149016e-4	0.8359648319874342	16.142680364513822	16.238633548616505	16.142905556003342	16.182109864277578	16.71365642894974	16.50813367549349	16.474493827636348	16.5681
Patient_vs_Control	G3V3Y1:Q8N8N7	NA:PTGR2	0.21051986976197057	12.273990373470372	3.5080135929190366	0.00869754	0.015456180941126978	-4.11662	12.129436799419334	12.141222813587728	12.220814874484052	12.183447266866432	12.55345358880345	12.327848984244424	12.25757986435298	12.37811879600458
Patient_vs_Control	G5E948	MAP4K4	0.2171449714210496	17.788962824064598	14.413201329791061	8.807697457737407e-7	1.1050482274295284e-5	6.030498299031166	17.6861	17.656115943976697	17.6988	17.680628384260384	17.873317224476178	17.909432938383983	17.91068223919774	17.89670883704258
Patient_vs_Control	G5E9E7	TJP1	-0.0591996	20.46157237983578	-3.89546	0.00507783	0.00969104	-3.53961	20.498594417061373	20.477097422195172	20.498993963086377	20.490002979247222	20.3997	20.444742025123197	20.451952776678745	20.431510999740656
Patient_vs_Control	G5E9S8	KLC1	-0.233139	11.689292208741138	-4.45957	0.00241271	0.00513782	-2.73374	11.83527555296586	11.871597093100217	11.725502634992132	11.791072272715288	11.440874613390523	11.604030614613905	11.670833385119549	11.575151503031632
Patient_vs_Control	G5E9Z2	CLPTM1L	0.029556746698368386	21.714979654082896	2.180759838667474	0.062633	0.0879513	-6.16248	21.70429245173991	21.716878406376523	21.682119778759493	21.697514486058928	21.71117783471198	21.732916296521054	21.74457809303851	21.730359885456767
Patient_vs_Control	G5EA09	SDCBP	-0.0858722	12.474869421366952	-1.9392	0.090463	0.12194221220326824	-6.52298	12.498407892017491	12.621139620291276	12.436375628411083	12.515298846276348	12.514184703951216	12.387992746520853	12.390084208648648	12.435471724818695
Patient_vs_Control	G8JLA2	MYL6	-1.21613	-0.545233	-56.5706	3.1066167352139556e-11	2.086655762059375e-8	16.630856330976652	0.0575211	0.0168215	0.10862859013584548	0.0683555	-1.1284	-1.15353	-1.17633	-1.15493
Patient_vs_Control	H0Y2V6	CEP170	0.4919137175620172	19.5242	13.338681836763232	1.5533526986471867e-6	1.654189023114055e-5	5.402006898213562	19.269192267164755	19.376311372211728	19.194540520493785	19.272895182532892	19.80689285474672	19.74173978973929	19.75841471576505	19.77354685240017
Patient_vs_Control	H0Y3P2	EIF4G2	-0.183507	10.617437811003438	-6.96726	1.5026317939660747e-4	5.209979752868127e-4	0.3210989674850335	10.725839933764544	10.68900646471958	10.716302134061197	10.705617184738005	10.452895210278465	10.55251884125181	10.572274861877986	10.525047857335911
Patient_vs_Control	H0Y3R8	TJP1	-0.436137	5.943223360591931	-36.5905	8.35570531449656e-10	1.8428764344582924e-7	13.494286614685997	6.15867	6.1764505332949815	6.149190401111817	6.16085	5.736214030230422	5.719032868657316	5.719697553637778	5.725674867172116
Patient_vs_Control	H0Y5F3	FLNA	0.2858179150352367	9.105952633451821	5.874622186142637	4.5646085266862614e-4	0.00127851	-0.907994	8.930826186856947	8.950512642142629	8.996563357023708	8.974272517713523	9.391372580471144	9.205125169905664	9.150663538318518	9.24829
Patient_vs_Control	H0Y626:Q15413:O95361:Q309B1	NA:RYR3:TRIM16:TRIM16L	-0.0647764	17.079754912040233	-1.17623	0.27511267471086076	0.32723126742770897	-7.53118	17.07455150733614	17.12845940240295	17.122902323114108	17.122659219477757	17.212658481394826	16.99142181776213	16.937608381340027	17.047778163493916
Patient_vs_Control	H0Y742	SUN1	-0.151486	10.803270276280353	-6.18557	3.2804895041061436e-4	9.781571518265853e-4	-0.543231	10.870048701027644	10.9352	10.833687648714736	10.877153368968472	10.765271162570356	10.70588675338157	10.709494063738848	10.729456569945892
Patient_vs_Control	H0Y858:Q6IBS0	NA:TWF2	-0.0378842	16.57209394657721	-2.26521	0.0550591	0.0783859	-6.03399	16.581832005819834	16.595986363783144	16.592794860988896	16.593531007302257	16.593591813880003	16.53930238672133	16.52642708034962	16.55328605377259
Patient_vs_Control	H0Y9Z7	KIF13A	0.3374599705596353	15.130411261309495	13.90045426624823	1.1487562817847534e-6	1.3230628343205473e-5	5.7363988513588335	14.946871568784044	14.95404340117934	14.978810260889638	14.966999873265692	15.364710724922558	15.279334694184689	15.25370912973129	15.298810437518714
Patient_vs_Control	H0YA96	HNRNPD	-0.192287	19.374066663300507	-2.36944	0.046963990719481506	0.0679407	-5.87415	19.445964829732333	19.278383491731685	19.662587595999923	19.493905594121983	19.391014043262057	19.273973432780352	19.175606891406304	19.271097427369416
Patient_vs_Control	H0YB09	DGLUCY	-0.91877	14.309471765307176	-17.2989	2.290669193971478e-7	4.862344899528993e-6	7.516205512057876	14.802755075273769	14.698509053596355	14.810138663163896	14.764023576275024	13.702816261744143	13.909370375535786	13.94039477901092	13.847766337857523
Patient_vs_Control	H0YBP7:Q96JY6	NA:PDLIM2	-0.30477	13.624547822243025	-9.99696	1.2429299463670427e-5	7.593191113356328e-5	3.0911564356825796	13.792466423704878	13.717484402507637	13.820787996474706	13.776992649651667	13.405549609987355	13.503650047727076	13.509305659000992	13.47014578888989
Patient_vs_Control	H0YC42:P55327	NA:TPD52	-0.24065	6.825190984889488	-2.2909	0.0529422	0.0757265	-5.99471	6.947975420980807	6.648889946551217	7.215667215791063	6.969530801118021	6.703519733562217	6.755461410742093	6.666	6.694482053598836
Patient_vs_Control	H0YD56:Q9BQB6	NA:VKORC1	0.0407863	16.639823303369393	1.5793173964769265	0.15499368238448566	0.19585548188396187	-7.03044	16.627420038058723	16.67370903754537	16.564223080366094	16.612368502726024	16.623234687346194	16.66293696407516	16.692541525222367	16.662152591615214
Patient_vs_Control	H0YEF7	PICALM	0.2609974311490042	13.032654285194482	10.196596437161999	1.0799042493557763e-5	6.852873816844865e-5	3.247575895394627	12.894908438750043	12.965528336840382	12.849036417183621	12.899149085705872	13.1931	13.142803489712788	13.151376177234711	13.16534284461644
Patient_vs_Control	H0YIN7:Q9UQ80	NA:PA2G4	0.20224530004562524	19.223491395274444	8.606622528261374	3.561010506917446e-5	1.688473942955272e-4	1.9202106253481759	19.107903055632715	19.141043919761263	19.115148647316023	19.125379358296513	19.38782312063938	19.30111722671723	19.284309051380976	19.32520678245144
Patient_vs_Control	H0YIZ8:Q8TC12:Q96NR8	NA:RDH11:RDH12	0.10847831436499078	15.090299974197068	6.961620027206284	1.5107625881329663e-4	5.229343315335852e-4	0.3151161651138299	15.038472653979529	15.066529727725031	15.006488883625876	15.032752002727854	15.132924556143031	15.143123772291776	15.15649106861466	15.145617128468787
Patient_vs_Control	H0YJ60:P40855	NA:PEX19	0.19781696820065875	14.08641389097349	10.450837257201114	9.059991218603654e-6	6.014186898022171e-5	3.4429075090669894	13.978678772849332	13.96511140894221	14.014064905051436	13.992166540649674	14.224973575806944	14.176350895590872	14.155465041146208	14.184499987751249
Patient_vs_Control	H0YJE7	DGKA	0.2751052406891148	19.13624783337771	10.514422308757084	8.675853296283501e-6	5.837920928760909e-5	3.4910997341163075	18.98740649186401	19.05511636724333	18.954711004320107	18.997546988705167	19.32178687456395	19.24881862517526	19.24886685637389	19.275729458775967
Patient_vs_Control	H0YJH7	TMPO	0.1758436093921798	11.244698910819285	4.762666377575328	0.00164938	0.00373219	-2.319	11.147361656231531	11.069237882365051	11.243439674254308	11.167069211641884	11.376956131706685	11.333158637099682	11.290855137837744	11.329512955417387
Patient_vs_Control	H0YJT2	STRN3	-0.00948709	13.194149990107405	-0.249066	0.8099238940778917	0.8399466374885336	-8.21493	13.198541086587232	13.09539148673584	13.293985857751917	13.207655701477083	13.194276843318368	13.20534241842809	13.17222856908432	13.185777957476391
Patient_vs_Control	H0YK59	CD276	0.6969611455383848	26.233231296836532	6.465125156625771	2.461752840352296e-4	7.74148115428616e-4	-0.22571	25.819097887434797	25.77667474446462	26.02869861306206	25.914531651307865	26.874765174164228	26.505693187131556	26.3687	26.57764461641972
Patient_vs_Control	H0YKW5:Q9C002	C15orf48:NMES1	-1.32095	20.83901755760856	-13.954	1.1168752054880244e-6	1.2981658931325434e-5	5.767572803787862	21.482002815559728	21.765299403101004	21.267863966289596	21.482803010394157	20.24717259992832	20.111509591751872	20.167706256544648	20.18778281729916
Patient_vs_Control	H0YNJ9	DUT	1.3266199074480625	28.515168641347135	5.912844782996326	4.380155433216724e-4	0.00123681	-0.862483	27.70902415626687	27.677169539097875	28.109642617650096	27.911598437477583	29.81411005857877	29.003493970410425	28.72456246171213	29.171747889583337
Patient_vs_Control	H3BLW5	L1CAM	-1.19423	14.811640492815762	-76.4498	3.1794755623811727e-12	4.643306111301465e-9	18.493049165558137	15.405330698237655	15.380261097587727	15.4372	15.412221333746285	14.23054968406635	14.214186471396625	14.19984934436907	14.213510927715191
Patient_vs_Control	H3BMM5:Q96AX1	NA:VPS33A	-0.152974	18.921713984662603	-12.7931	2.106370933507681e-6	2.050762740863078e-5	5.064184247462336	18.99689421376377	19.015673561854552	18.983082968686706	18.99715379162748	18.850431843774135	18.84059728625109	18.84404466923837	18.845833542104707
Patient_vs_Control	H3BNC9:P08708	NA:RPS17	0.0558605	15.8634	3.04662	0.016953546552145163	0.0275835	-4.82324	15.824983142084108	15.83619453500375	15.842038839586994	15.838755860435572	15.93768997305278	15.87632544211194	15.860065719408505	15.89133339082915
Patient_vs_Control	H3BNI4	ATP6V0C	0.26254876581644737	25.44334508142755	2.3652545041032798	0.0472645	0.0683146	-5.88059	25.297798018228313	25.62677189771913	25.033434662799355	25.290278215330524	25.627493746321797	25.504387438255293	25.581	25.585586562593587
Patient_vs_Control	H3BNX3:Q9Y6N5	NA:SQOR	-0.84147	19.94436316023099	-15.4915	5.179793055487159e-7	7.912729893549632e-6	6.617294543305421	20.402143380573136	20.339105451655175	20.363579705660573	20.3556	19.36105564277518	19.580334724648797	19.63024768392927	19.522875536127867
Patient_vs_Control	H3BQ06:Q9ULP9	NA:TBC1D24	0.1371238714773284	16.41405134506506	3.4485011926651588	0.00946478	0.016605433609550507	-4.20673	16.32780142270837	16.436494295966977	16.274188951635868	16.343472966994373	16.5577	16.443057038068794	16.44395059786627	16.485726901294342
Patient_vs_Control	H3BQZ4	E4F1	0.4157353659790708	26.26814863899237	7.896464807652162	6.449909148923495e-5	2.66991137219044e-4	1.2598641174513254	26.082942925691185	26.161113431222695	25.95237589075915	26.044691576338288	26.3728	26.49216823928529	26.559425259051384	26.479646404176854
Patient_vs_Control	H3BRB1:Q9H6E5	NA:TUT1	-0.0854921	15.043489761201432	-4.47553	0.00236408	0.00505194	-2.71158	15.090783447463965	15.125462760513702	15.047177037371569	15.081520046060229	14.979427713447382	15.00096888791628	15.02044048737216	15.002137709466174
Patient_vs_Control	H3BT57	PML	-0.356341	15.83842180265521	-5.64862	5.847467334133297e-4	0.00157632	-1.18104	16.05336375543578	16.089222088744734	15.924882173104294	15.99890119927731	15.495727724838398	15.700907446606402	15.78141677557743	15.66295325765733
Patient_vs_Control	H3BT81:Q9NZV5	NA:SELENON	0.0259534	18.496838650868455	1.4668280938710336	0.18263866018162941	0.226115	-7.17877	18.486583302479204	18.521684872015875	18.44733892241648	18.479840647781895	18.4966	18.507671497707857	18.523837695947016	18.5112
Patient_vs_Control	H3BU16	JPT2	-0.0523226	12.364348786640035	-2.57804	0.034196	0.051105	-5.55144	12.395310258912405	12.342333172939863	12.431377180720377	12.393019812807893	12.318557649828003	12.352650866549691	12.34502166131836	12.336519690043689
Patient_vs_Control	H3BUA5:P78324:Q5TFQ8:Q9P1W8	NA:SIRPA:SIRPB1:SIRPG	0.276357	20.275824307924243	2.8773742802161046	0.021793075093725134	0.0344892	-5.08586	20.0713	20.167152806523703	20.155982707904847	20.156145860389135	20.705695296572102	20.315155357533417	20.220406341259324	20.414753758085617
Patient_vs_Control	H3BUB6	SCAMP2	0.17895590894107727	23.881588351517138	7.763373124952218	7.244214457130982e-5	2.9403698702596125e-4	1.1308377737726598	23.7801	23.83043407316778	23.765233580256155	23.792716197644474	24.02300218585564	23.9479	23.941031058723578	23.97235786944948
Patient_vs_Control	H3BUX3:Q8N4H5	NA:TOMM5	-0.248469	19.394480379355237	-5.20752	9.667286521165548e-4	0.00239696	-1.7339	19.532673870933525	19.62995984466097	19.40721987855402	19.50500536723443	19.205109242438308	19.272392442593286	19.32927851592487	19.274203872502476
Patient_vs_Control	H7BY82	COL5A1	0.23914771784834343	13.452652790478696	5.446615785741634	7.337545227517236e-4	0.00190807	-1.43091	13.361371511113628	13.354064394341227	13.294495995056572	13.322383825706677	13.44675737220988	13.609049867708592	13.660016665076451	13.573082692616545
Patient_vs_Control	H7BYZ3:P63098	NA:PPP3R1	0.22273715608816147	15.73425506337839	18.07501782906344	1.6539675264809914e-7	3.946820548485033e-6	7.873784674748514	15.626362301663663	15.607568731742065	15.63454659210898	15.623068315822527	15.830782726434888	15.852989346051023	15.853620803535565	15.845101689668406
Patient_vs_Control	H7BZ94	P4HB	-0.381223	12.697503216950649	-9.59376	1.6637297483506104e-5	9.476279506519735e-5	2.7667393084171987	12.905317668771408	12.795774478034556	12.960970605906656	12.89039601740792	12.433968568248796	12.545971658759807	12.543897479410491	12.50372925906556
Patient_vs_Control	H7BZD4	ITSN2	0.0516383	15.61354855362357	0.895256	0.3981823327293873	0.4543011552484353	-7.81899	15.562767343183523	15.725560403100005	15.478491873057738	15.584097964287356	15.74505840267878	15.582051347723006	15.586269872586817	15.64409122237133
Patient_vs_Control	H7C004:P05120	NA:SERPINB2	0.42533319545312054	39.563520369320436	2.8688903233653127	0.022070825722628952	0.034883370005765496	-5.09905	39.2506	39.31419005842602	39.45305365439165	39.38561427209184	40.21976453754927	39.63965789056979	39.470850993263255	39.77447444680566
Patient_vs_Control	H7C096	BNIP2	0.24462754952648424	14.512556831963149	3.357160080528726	0.010786084239896687	0.018575468660312643	-4.34569	14.440279083109951	14.375861473596004	14.36919915632716	14.375632515766515	14.414625213160974	14.708170662199294	14.78210652946698	14.634580022078314
Patient_vs_Control	H7C0I5:Q9Y697	NA:NFS1	-0.123025	17.0709	-11.927	3.503842186921633e-6	2.9959081556091056e-5	4.499116616212792	17.132074112371022	17.13647517462915	17.128891159048706	17.132163903691527	17.01068831303884	17.008265516577733	17.00903448109337	17.009517933452855
Patient_vs_Control	H7C0W7	HYCC1	0.012703630999121529	14.85926088020151	0.7374571734594054	0.4830408530685859	0.5377594616720254	-7.95283	14.846252707723824	14.884897940294591	14.828146636808082	14.852338973981304	14.893948724835042	14.851085456035248	14.850711317865764	14.86670528406823
Patient_vs_Control	H7C144	ACTN4	0.27627913779749136	8.144061230801148	4.323858302241392	0.00287327	0.00593007	-2.92364	7.970501197977278	7.9202301854160915	8.108677734328626	8.024277529887609	8.441183688258135	8.245536319910972	8.163036302349699	8.279046888280769
Patient_vs_Control	H7C1Q1:Q9BXI6	NA:TBC1D10A	-0.158672	18.910528745816947	-11.2213	5.441270034507077e-6	4.151740208147406e-5	4.009924674600942	18.9919	19.015171781770896	18.965296621251344	18.987113637852925	18.82150876400664	18.830029299270585	18.841145278207776	18.832088328225023
Patient_vs_Control	H7C2K6	EPB41L1	0.13815453185165083	16.7849	2.0582638880287183	0.0754928	0.1038132797932424	-6.34678	16.70545933619827	16.90415898214357	16.550350682051626	16.70337512295482	16.893728501568916	16.809357075095043	16.85233102767763	16.860545646413307
Patient_vs_Control	H7C3C4	SLC4A7	-0.0457905	16.754200816823197	-1.27848	0.23882631376038505	0.28791641787656125	-7.4128	16.79482834200616	16.70253310376764	16.833298529696133	16.777724278726794	16.655478165278577	16.768313686507096	16.772662121330878	16.728768307272308
Patient_vs_Control	H7C3G6	MPRIP	0.1341204410835335	14.351905957954791	7.5369027465076455	8.859915554502742e-5	3.4266474247340585e-4	0.9072354950969146	14.288760609023056	14.24472830902435	14.31893243815006	14.286961593454633	14.402983093367803	14.430893241554053	14.4244	14.417577052683171
Patient_vs_Control	H7C4K7:Q5SRE5	NA:NUP188	0.1157514326491551	20.18494328766268	9.544177495474315	1.7257318518323385e-5	9.724248771831994e-5	2.726030613680022	20.12494772507165	20.111864295576083	20.14245006947121	20.129008195233467	20.25265657722262	20.242224592329055	20.23411764588627	20.24227720051109
Patient_vs_Control	I3L3Q4	GLOD4	0.019327457027625172	17.148111089994813	0.7552779197431821	0.47289100629417524	0.5275053663244833	-7.93881	17.124208617954896	17.17851788587449	17.11146492898779	17.139598013106827	17.219297429460042	17.131202508070377	17.1215	17.159118273374485
Patient_vs_Control	I3L521:Q9Y580	NA:RBM7	-0.0693297	13.68889598823549	-2.96694	0.019073967851884945	0.030623543751006208	-4.94674	13.714635571941235	13.681408327718431	13.768294913009232	13.72990459371088	13.694950426797142	13.648257305579866	13.621000841476327	13.652715925650806
Patient_vs_Control	J3KN66	TOR1AIP1	-0.161947	17.12649678015733	-1.10598	0.30259232285278626	0.35649066496790016	-7.60855	17.12169500757277	17.033482193761603	17.425584157349927	17.249119145278275	17.429446545766655	16.951412015420978	16.762174538539995	17.03906063756842
Patient_vs_Control	J3KNG6	SPIRE1	0.0893297	13.611266467403176	2.153305151516794	0.0653123	0.0912747	-6.20401	13.59295090235066	13.590046923496775	13.52709355150875	13.556315016199877	13.538954935763844	13.689605831172928	13.738299286309964	13.656865292422609
Patient_vs_Control	J3KPM9	STAT1	-0.180218	14.146039386960453	-6.92588	1.5634198188626115e-4	5.379873476595093e-4	0.2771349682932218	14.23898831671499	14.301242900321716	14.174551440514522	14.229809903293685	14.041317408765828	14.049624608097083	14.074556678764075	14.05822383921172
Patient_vs_Control	J3KR12:Q96C36	NA:PYCR2	-0.126569	19.701260894314135	-4.10693	0.00382054	0.00756759	-3.23248	19.784673176343812	19.760799346780622	19.7542	19.75849751859013	19.549313585626884	19.667138869941187	19.697522413191425	19.63793104834003
Patient_vs_Control	J3KS54	FLII	0.13712301160197526	16.44521788896834	1.4937353154938806	0.17564922811899616	0.2182761510763972	-7.14383	16.333805432497513	16.210010346124495	16.558683044231756	16.40412670981564	16.70813119262411	16.479424450179952	16.35980500383963	16.507756932433626
Patient_vs_Control	J3KTD8	CBFB	0.24297813768309595	19.80240354331871	4.044449294240756	0.00415268	0.00814911	-3.32261	19.72199427459031	19.649455144906113	19.6816	19.67056168413224	19.743699730856623	19.987193033597187	20.041712301070262	19.922965383116956
Patient_vs_Control	J3QQQ9:P61254	NA:RPL26	0.11549944745969754	17.751393589056335	7.771350836387298	7.193636519545729e-5	2.93087816750024e-4	1.1386208133057725	17.689072721016387	17.72033673892608	17.67230855897678	17.692857442386682	17.82845124697271	17.798416629313827	17.799646167055336	17.81005920780288
Patient_vs_Control	J3QQX3	FDXR	-0.653167	8.74827	-19.7926	8.417878956941777e-8	2.5399732290739197e-6	8.61272	9.091407383087065	9.008101741049623	9.124705145630326	9.075202066910611	8.350810334323395	8.45578	8.46074	8.419418959787274
Patient_vs_Control	J3QRE1:Q8ND04	NA:SMG8	-0.0196788	17.72750913670291	-0.748534	0.4767152389354615	0.5315276644841563	-7.94415	17.744150003335356	17.796266805214607	17.678702621168277	17.730274652073867	17.68578129502152	17.71796684757839	17.747167457434614	17.71976341179666
Patient_vs_Control	K7EJB5	SNRPD2	0.4175652856809755	23.861380546048686	10.590173388563949	8.241905780980181e-6	5.640337020873222e-5	3.5481749777722627	23.629201562815425	23.715652712827083	23.610815811055573	23.65472152613472	24.17134312816151	24.02694355855059	24.01009304829767	24.07227302054691
Patient_vs_Control	K7EK78:Q86Y39	NA:NDUFA11	-0.0505119	17.070971857422034	-1.50417	0.17300505677868463	0.21528338864995827	-7.13019	17.11072698589621	17.156857926414375	17.030748164297925	17.086578238921426	16.979818577440735	17.056666470530878	17.09847613701666	17.047902358858057
Patient_vs_Control	K7EKQ2	CDC37	0.15391043469267984	17.21356607442911	2.1007611920188127	0.0707605	0.0980158	-6.28315	17.179066955859067	17.22403410415216	17.02745554885068	17.115886819469186	17.100449131585506	17.336896458291786	17.430973683937957	17.29376589328655
Patient_vs_Control	K7EKS7:P35268	NA:RPL22	0.00217521	16.95921927779756	0.08367	0.9354857010661927	0.9480800262575072	-8.24592	16.966278352042302	17.012575423295345	16.902666244672606	16.951006678417265	16.922628190413526	16.963223772959257	16.99312608364658	16.962249476933597
Patient_vs_Control	K7EL88	BECN1	0.0936095	17.007284041637813	2.297055986773189	0.0524468	0.0751357	-5.98528	16.975982562932717	17.043982275027034	16.87335168446847	16.94860064250283	16.98302963770476	17.06283228813032	17.113412168564672	17.0571
Patient_vs_Control	K7EP86	RHOT1	-0.0642218	15.404669311814812	-1.45845	0.18486395848637294	0.22856021416652472	-7.18958	15.458721680499616	15.50661858158836	15.357771550331586	15.42400904359688	15.273538494478949	15.392609601680295	15.44898623902435	15.375099303318464
Patient_vs_Control	K7EQG2:Q8IY67	NA:RAVER1	0.0317571	15.971165138129715	1.2407268018908495	0.2517258739766487	0.30197179756489057	-7.45728	15.938981082230775	15.962675833019858	15.959667567161867	15.959821937530965	16.05872970264833	15.96272778961761	15.939484120108856	15.98723307271946
Patient_vs_Control	K7EQZ3:O43291	NA:SPINT2	-0.158607	10.816242739266047	-5.27719	8.913785692071227e-4	0.00223837	-1.6448	10.90625534878166	10.956676512620696	10.832200014609302	10.887052323750645	10.687742943479394	10.742431600168311	10.778455897381116	10.739127273337248
Patient_vs_Control	K7ERI8:P51148	NA:RAB5C	-0.0680478	17.173716219079964	-4.3018	0.00295679	0.00608525	-2.95475	17.20477220675248	17.241293789135945	17.179020881082668	17.205873609430824	17.15170870376631	17.13015160142311	17.136053491882656	17.140855469165732
Patient_vs_Control	K7ERU9:Q2NL98	NA:VMAC	-0.00690399	11.231184000025864	-0.281048	0.7861904067367798	0.8203432909391205	-8.20543	11.238526926718794	11.171391344483478	11.28993330245618	11.238692410468587	11.21259542080156	11.243297707376716	11.22950255110695	11.225532336794654
Patient_vs_Control	K7ESF4:Q9BRP1	NA:PDCD2L	0.0352945	16.465361589716093	1.3515239300754325	0.2154673708810405	0.26218009367994627	-7.32436	16.432194830198906	16.48127814844489	16.427570824546972	16.449813593619453	16.550389318731426	16.45565198477822	16.441875207251428	16.484118810157433
Patient_vs_Control	L0R6Q1	SLC35A4	-0.315945	15.882843268315224	-5.87513	4.562118628852835e-4	0.0012783	-0.907392	16.073971847485492	15.958853375225011	16.093250258362303	16.037188448546956	15.58124762291176	15.784944472861548	15.811150357411533	15.72213976371719
Patient_vs_Control	L0R819:U3KQP1	ASDURF:NA	-0.825833	-9.53856	-7.99531	5.9229033224230955e-5	2.508645015100548e-4	1.354582107731595	-9.06864	-9.33171	-8.97578	-9.12643	-10.1963	-9.83784	-9.81328	-9.95845
Patient_vs_Control	L0R8F8	MIEF1	0.19014925095146396	21.621830751335537	3.3191143397215743	0.011393160160542176	0.0195059	-4.4038	21.56543595887979	21.480475983397692	21.542712043517405	21.51840051764433	21.547773413569814	21.779153075060194	21.825246466415265	21.71544855219981
Patient_vs_Control	L7N2F9:P63027	NA:VAMP2	-0.149444	19.37607974835319	-2.49357	0.038875195300573345	0.0573468	-5.68246	19.412170056100003	19.52816393998623	19.406328365035904	19.45654408960894	19.469281158943225	19.23424283127913	19.19800342906208	19.30390411681003
Patient_vs_Control	M0R082:Q8TAU3:Q96SQ5	NA:ZNF417:ZNF587	-0.195689	8.908849042839707	-13.7359	1.2534147898294014e-6	1.4167855720331717e-5	5.639804550007598	9.012976993127763	8.991641338424325	9.016189967099583	9.005965914467431	8.783770839910488	8.822312935969794	8.82743	8.8105
Patient_vs_Control	M0R2C6:Q9NP81	NA:SARS2	-0.178428	14.874891763848114	-12.7478	2.1614848214071123e-6	2.093315689623319e-5	5.035520646490065	14.969251858183632	14.978445073139348	14.947445628476276	14.96128124858498	14.762519905185728	14.79070410949437	14.803284285949616	14.786202001770963
Patient_vs_Control	M0R2G5:Q9BQ49	NA:SMIM7	0.076325	21.783897904713985	1.2331543486791905	0.254383	0.3049583783873946	-7.46609	21.77588429133542	21.85066785642869	21.628952134584765	21.727437284978382	21.68571370462155	21.84818747078289	21.92847439182396	21.82586610315623
Patient_vs_Control	M0R2K9	FKBP8	-0.0124019	19.066105397481536	-0.537335	0.6064422799660322	0.6561329868590854	-8.08961	19.085708783592853	19.08623452084469	19.050375304388503	19.066906706800445	19.000340784733005	19.076714794695533	19.102112581641713	19.060449703155555
Patient_vs_Control	M0R2N4:Q01081:Q8WU68:Q86Y38	NA:U2AF1:U2AF1L4:XYLT1	-0.122117	14.435447663842403	-5.5819	6.299020110914237e-4	0.00167317	-1.26296	14.509825754759348	14.496700263422705	14.48721816372725	14.492280722680013	14.315631187572777	14.393262726663744	14.414209788174364	14.374452703739028
Patient_vs_Control	M0R2N6:P18887	NA:XRCC1	0.2218297352640235	17.86070764415814	15.702497933806702	4.687931105739417e-7	7.450715004063209e-6	6.727424565881458	17.746849948130887	17.72653978467383	17.773115089136517	17.752666284163265	17.985348092646067	17.97113834037214	17.959208498955395	17.97079511518702
Patient_vs_Control	M0R3H8:P28340	NA:POLD1	0.23451006317251455	18.549380387801126	2.942640556937687	0.019774682600368892	0.0316239	-4.98446	18.37741301209985	18.44239399466072	18.460136930066977	18.448557488031927	18.90763955335597	18.58735139310832	18.504788798252175	18.66676193283307
Patient_vs_Control	O00115	DNASE2	-0.490424	13.801219517647555	-10.9353	6.550353033109624e-6	4.792859978350409e-5	3.803655805500277	14.050438943023906	14.166577617626672	13.933586021338364	14.035122992147262	13.534481580237063	13.542616259220782	13.586697752445048	13.560234975141343
Patient_vs_Control	O00116	AGPS	-0.0855761	17.769894632081964	-4.07143	0.00400553	0.00789217	-3.28362	17.805016793872106	17.85837640339796	17.776051369617594	17.811286166457986	17.75945655535784	17.70897017014209	17.7113	17.72867511807344
Patient_vs_Control	O00124	UBXN8	0.16174677217976097	21.499290908956073	1.6549331515542833	0.13861791330059758	0.17804538309955384	-6.92763	21.47046323345542	21.565142973395016	21.248357470579514	21.38970641403483	21.34589309658037	21.630732787580264	21.758503396808997	21.58552789921418
Patient_vs_Control	O00139:Q8N4N8:Q99661	KIF2A:KIF2B:KIF2C	0.00283649	17.637766912197048	0.15754957832461258	0.8789266041950576	0.9005082171786601	-8.23586	17.627504788610086	17.619666300943134	17.657685713269355	17.64053786870874	17.678729448224956	17.629282189687522	17.610166141771188	17.638562846361406
Patient_vs_Control	O00142	TK2	-0.423034	15.832583097117947	-9.4684	1.825559681270246e-5	1.0152503269333842e-4	2.6634643578351493	16.06971098794033	16.09542174729642	15.979550777642196	16.031716981661177	15.506453845670007	15.649265719906492	15.70557097985333	15.622973736973622
Patient_vs_Control	O00148	DDX39A	0.3324253009676106	18.22949150585173	23.02126747972802	2.7227210370180967e-8	1.2482881371587336e-6	9.837810135376095	18.057240559716497	18.051421633017313	18.078275092828644	18.066178135909237	18.422718597654193	18.389016924526395	18.375818206371157	18.395262896790392
Patient_vs_Control	O00151	PDLIM1	-0.111573	15.489504252815689	-5.02078	0.00120563	0.0028676	-1.9761	15.55255101612994	15.494012623047087	15.587316931088074	15.54728208064883	15.403335563652009	15.452165469278183	15.447418451866811	15.431951886814575
Patient_vs_Control	O00154:Q6ZUV0	ACOT7:ACOT7L	0.19189993216696877	21.197711923472184	5.4518	7.294464548777298e-4	0.00189755	-1.42443	21.083183892469876	21.169801535027226	21.05211614165441	21.101946260403285	21.37342899325821	21.25648926421114	21.248762351956692	21.29596694879662
Patient_vs_Control	O00161	SNAP23	-0.0634132	18.437509784123275	-3.02647	0.0174651	0.028340093901429494	-4.85444	18.46734117848972	18.52137770691495	18.422697328030942	18.465449297999033	18.41240355864495	18.39485845884733	18.40832767918587	18.4076
Patient_vs_Control	O00165	HAX1	0.13481881901317294	17.69752347389284	5.459130097723166	7.233947587153868e-4	0.00188651	-1.41526	17.64130483378471	17.579665710296148	17.66869168126562	17.630794032198544	17.717187178734154	17.788827203802843	17.790504387664463	17.763212763396243
Patient_vs_Control	O00170	AIP	0.4357465154756994	18.32238845589636	7.0779463943090635	1.3525958758510802e-4	4.7692148328243674e-4	0.43774222181888156	18.062920730489164	18.09849317430755	18.138483529615215	18.11816335822211	18.723925511161873	18.482182889260127	18.41506515244928	18.53987330166556
Patient_vs_Control	O00178	GTPBP1	0.20944623814759566	18.653927083276322	13.79142641675802	1.2169428698477592e-6	1.3841303482287129e-5	5.672521957330854	18.541981078945533	18.54104273361556	18.561623355265624	18.55216868898338	18.790771398178183	18.749694753562732	18.735801249303517	18.758333408356055
Patient_vs_Control	O00186	STXBP3	0.0123354	17.70067097884486	0.475514	0.6478189725059293	0.694724	-8.12386	17.693460074737875	17.76232966977393	17.63305935779184	17.68916394675738	17.709267262032785	17.69458721450416	17.714289241096207	17.70921106406471
Patient_vs_Control	O00189	AP4M1	0.1438400556831816	19.662154370976847	10.207766879040632	1.0715187596187607e-5	6.80959963684612e-5	3.2562481001898202	19.59192869658771	19.615872964066956	19.565579721672783	19.587555990213573	19.7258	19.73240776718701	19.74313041245845	19.734980069938395
Patient_vs_Control	O00192	ARVCF	-0.619973	9.589068884601263	-15.1431	6.124969621454556e-7	8.856342213041815e-6	6.4321720401256535	9.874886725592413	9.85844	9.952806061867866	9.910087990006463	9.3869905327022245	9.251229016256882	9.200553528090882	9.277555957019883
Patient_vs_Control	O00194	RAB27B	0.20867345386014868	15.215859894464842	5.204668465091645	9.699587827785859e-4	0.00240334	-1.73756	15.095465031727894	15.208254775039228	15.033859853606026	15.108513009765929	15.387929285285464	15.282044222360796	15.287295105860496	15.323517872072902
Patient_vs_Control	O00203:Q13367	AP3B1:AP3B2	0.22348824834541858	19.08322865051161	7.718612339330682	7.535468776664992e-5	3.023409963246502e-4	1.0870522107688565	18.987960007861812	18.99956512893696	18.934482083618335	18.963930884938502	19.121400759131056	19.213897244549493	19.248566039955655	19.196027055101073
Patient_vs_Control	O00213	APBB1	0.1654906202449986	16.965482860657783	7.0738267111138065	1.3578713437198785e-4	4.7807022911487717e-4	0.43342511672054584	16.86825957416745	16.882165364634815	16.893164506505112	16.887360756833747	17.112108047489905	17.027770408295062	17.004887850419493	17.04814637691667
Patient_vs_Control	O00214	LGALS8	-0.211088	15.363032439378342	-4.51043	0.00226141	0.00485386	-2.66324	15.484838212480698	15.570555520243282	15.363998708027966	15.454914119725132	15.182492371665608	15.264374006988367	15.321955377201803	15.26113119869388
Patient_vs_Control	O00217	NDUFS8	-0.126235	17.735116882243485	-4.3081	0.00293267	0.00603901	-2.94586	17.813108722167613	17.838759867451923	17.750922050218144	17.790146422531585	17.60509082918434	17.686675355421155	17.722748753590285	17.673483057382835
Patient_vs_Control	O00221	NFKBIE	0.1677037499778251	15.544961164143304	7.848582001582001	6.723886601124021e-5	2.7691945832717204e-4	1.2136434179347244	15.474141531948154	15.456159005013289	15.456732078212587	15.457404541443536	15.571487129504993	15.64809584076773	15.66697404076793	15.628695145488216
Patient_vs_Control	O00231	PSMD11	-0.0873994	18.26525649150125	-4.01396	0.00432601	0.0084446	-3.36678	18.31643510346257	18.349918856290333	18.266301793067143	18.303168970062984	18.18725541780968	18.225666752568976	18.250280900836525	18.223024137911807
Patient_vs_Control	O00232	PSMD12	1.1180956361300787e-4	18.819666865585386	0.00407123	0.9968567144851723	0.99754	-8.24986	18.82232896950546	18.88932372972317	18.753865789195807	18.812925354789876	18.80550047902952	18.812510008577604	18.83870331169901	18.82217728216264
Patient_vs_Control	O00233	PSMD9	0.046755178546362686	21.563463191065253	2.4072127765147218	0.0443362	0.0645677	-5.81595	21.529502549065135	21.52774926380937	21.55862941648779	21.54446117780601	21.633917240504015	21.573779247996704	21.553303283168827	21.586363349684177
Patient_vs_Control	O00244	ATOX1	0.0669991	15.017951398355075	1.2234276010376657	0.25783	0.3084829285032812	-7.47736	14.947626621703671	15.030803914540233	14.967161456029404	14.992215315864277	15.212399968801202	14.991824123957148	14.948661561244764	15.0529
Patient_vs_Control	O00254	F2RL2	0.18484335118654016	14.029056717792574	1.9804279667962474	0.0849781	0.11531183022194592	-6.46234	13.872175904122043	13.967020406939035	13.952877839264662	13.95446601847148	14.404830635837808	14.025166168803828	13.933648484854947	14.122268284046786
Patient_vs_Control	O00255	MEN1	-0.0564551	10.466778459497329	-2.40845	0.0442529	0.0644593	-5.81404	10.483043548236733	10.467048119718587	10.52880922545934	10.50112318899238	10.492212351409467	10.426012267952771	10.398458810206742	10.437520164002605
Patient_vs_Control	O00257	CBX4	0.30960530761583094	14.139860983104878	4.8328206520571415	0.00151327	0.00347372	-2.22487	13.947636840761122	14.099174596633665	13.906075408455646	13.987346471337414	14.456071926122345	14.223429484433048	14.200650151268189	14.298502985827598
Patient_vs_Control	O00264	PGRMC1	-0.0668224	6.630834752164285	-1.20551	0.26428192223282587	0.3153761392619863	-7.49796	6.647749458512893	6.534653988963656	6.794289744493586	6.680290648896991	6.674340279656764	6.594589318765406	6.527952631891061	6.592811946133924
Patient_vs_Control	O00267	SUPT5H	0.00977379	17.03721616210413	0.6398981971338136	0.5410886701978594	0.595124	-8.02433	17.038540375753584	17.009135680693323	17.049336068054668	17.03230495211809	17.015449236169182	17.054601651868964	17.05704455409241	17.041316778082827
Patient_vs_Control	O00268	TAF4	-0.051655	10.273379775675837	-1.04753	0.3270973529516992	0.382338	-7.67028	10.332700749740358	10.286744676569649	10.287719520734996	10.289664194750316	10.100213713033751	10.297068690070166	10.345668280887612	10.24725837961985
Patient_vs_Control	O00273	DFFA	0.0845497	12.713505840185668	3.10821	0.015484951645666111	0.025483686481102982	-4.72801	12.66522817192152	12.607563813964202	12.733682573954976	12.67844936561298	12.784298387327766	12.757371289477785	12.72792908648276	12.753524032743364
Patient_vs_Control	O00291	HIP1	0.11274217730751701	19.01883625582122	2.84007	0.023042233615930326	0.036222688883428035	-5.14387	18.94158615788703	18.906443930922208	19.02808485116286	18.973745728697757	19.16909817680625	19.054469930036294	19.004106100334553	19.073155170722824
Patient_vs_Control	O00299	CLIC1	0.22628466139979153	16.888441389243514	7.647504785782266	8.025452384722869e-5	3.18142526130545e-4	1.0170827121575616	16.756015135286223	16.782752786446686	16.7817	16.780770245049673	17.086405243508445	16.973030344801508	16.945136611549902	17.001762679913785
Patient_vs_Control	O00300	TNFRSF11B	-0.372037	14.587161973849662	-4.57791	0.00207643	0.00449755	-2.57027	14.819043051671928	14.617319663354303	14.884645054184304	14.771713611747144	14.203838888960568	14.490987438536203	14.513870665416366	14.39587741692648
Patient_vs_Control	O00303	EIF3F	0.023631605787556964	16.811261405103636	1.718642364876553	0.12608181265562915	0.16358375906385997	-6.83928	16.805244660285823	16.807285624820306	16.788294436452723	16.796957687280585	16.79724672461647	16.83006282356545	16.841622609867052	16.823376673940693
Patient_vs_Control	O00308	WWP2	0.1845438735850493	12.670584359987377	5.236621318907092	9.34431598692355e-4	0.00233176	-1.6966	12.558390480799282	12.639387629687077	12.535968071138294	12.57950351115476	12.84877427850204	12.724882250119787	12.712857083651446	12.76491157484633
Patient_vs_Control	O00329	PIK3CD	0.12775964789179994	17.403682157353604	1.8816083724677362	0.0987011	0.13170964038976515	-6.60696	17.30379685346692	17.2388	17.456973238356408	17.35962127250729	17.629615263251534	17.432495708476512	17.344267281847927	17.463869671622046
Patient_vs_Control	O00330	PDHX	-0.175348	20.098561690272156	-5.39991	7.738899402399947e-4	0.00199047	-1.48947	20.204597040328903	20.131365071483863	20.223961691752628	20.185019333226546	19.93165494857125	20.045661279224472	20.057191073093055	20.009043084496525
Patient_vs_Control	O00391	QSOX1	0.1871657064029364	24.15939788565928	17.46573931559927	2.1332991104659884e-7	4.636116102566264e-6	7.5944189011173115	24.06723434735799	24.0722	24.059006130342116	24.064834036823154	24.24651613307593	24.25398352269877	24.258213265840375	24.253210033827926
Patient_vs_Control	O00399	DCTN6	0.0526631	20.216019421335268	2.7230182195774173	0.0274681	0.0422167	-5.326	20.18043637213147	20.22191199744515	20.16648485611817	20.18991823623423	20.28212647148636	20.224103095464528	20.21973359948831	20.24344074231393
Patient_vs_Control	O00401	WASL	-0.0564496	14.02405095622578	-4.25717	0.00313395	0.00639853	-3.01789	14.058	14.054318578119116	14.046478415651633	14.050291393920311	13.97044678720742	14.003646971963024	14.01328864078588	13.995922213237158
Patient_vs_Control	O00410	IPO5	0.22176210661211826	21.5447	17.948186402084488	1.7427583291135538e-7	4.046775951970548e-6	7.8164205229935035	21.42921683379083	21.442110746643337	21.42942050709077	21.43460859203883	21.67572515638999	21.64772725161965	21.64308127595472	21.65587142204788
Patient_vs_Control	O00418	EEF2K	0.1578784985546413	19.981398839253828	4.733949085426172	0.00170892	0.00383364	-2.35774	19.8838	19.960634604085612	19.86189390402352	19.903486888199204	20.14067952306679	20.0246	20.013726766961625	20.062297217529068
Patient_vs_Control	O00422	SAP18	-0.00224401	16.32744292245767	-0.157701	0.8788112546768263	0.9005082171786601	-8.23583	16.335442964839324	16.32619488006297	16.32603246343654	16.326589392585458	16.29605819695935	16.33645930240945	16.346498980190745	16.326267199177522
Patient_vs_Control	O00423	EML1	0.21784983413080283	19.987194648783387	4.731164640324889	0.00171481	0.00384215	-2.3615	19.84720408352165	19.883409058250656	19.894808123904316	19.887657661195306	20.23298376477434	20.051211889308757	20.004115430747063	20.096167178564993
Patient_vs_Control	O00425	IGF2BP3	-0.326423	19.541342121673456	-21.8573	4.013809687976673e-8	1.575365214716941e-6	9.418136226715632	19.70115187261085	19.678893311211436	19.730396371647423	19.707773598113977	19.39395817047361	19.37737701012346	19.36396990336763	19.377216735839266
Patient_vs_Control	O00429	DNM1L	-0.0239815	17.098339100341555	-0.551809	0.5969637603013406	0.6466443224626003	-8.08103	17.109728723724242	17.230011716743544	17.001062282735578	17.100516728474304	17.085165821470508	17.066489574832218	17.103198210643992	17.090539744108057
Patient_vs_Control	O00442	RTCA	-0.0751021	17.212230326177057	-5.38429	7.878519892605986e-4	0.00201927	-1.50913	17.245137397531284	17.271400445221094	17.23314564088795	17.249442055422495	17.194471051676516	17.16465492316617	17.164174043438592	17.175417052072362
Patient_vs_Control	O00443	PIK3C2A	-0.0628301	20.313086682987773	-2.40688	0.0443587	0.0645877	-5.81646	20.360365929798792	20.35700167971899	20.32219582827402	20.338443527969034	20.21129512857899	20.302202705294444	20.331011354095672	20.282177310172234
Patient_vs_Control	O00459	PIK3R2	-0.0910951	17.616436604335007	-7.40288	1.0003707483424064e-4	3.767254875913487e-4	0.7724395370669637	17.66136528513444	17.681562129359385	17.64446578090486	17.660543370080553	17.572991610505177	17.56690172458069	17.57209044130848	17.571572492806485
Patient_vs_Control	O00461	GOLIM4	-0.00689837	21.334777309117484	-0.347251	0.7378451122172189	0.7783509115010305	-8.18221	21.337924199218737	21.29025102625168	21.38239889097393	21.34233185360399	21.334198458553757	21.338517618760967	21.322950776752744	21.329645648824073
Patient_vs_Control	O00462	MANBA	-0.426401	16.006475365226514	-22.0022	3.820339968434518e-8	1.5160936113863506e-6	9.471653312741505	16.231044441745034	16.2081	16.22252682925807	16.21705210817487	15.74349955551997	15.811252284731186	15.82543121235618	15.792917172535418
Patient_vs_Control	O00463	TRAF5	-0.458924	4.127180803960482	-5.77491	5.087594969598123e-4	0.00139923	-1.02763	4.370166893144045	4.133453242691596	4.551927285889816	4.371022943306583	3.845214131813826	3.952356719665543	3.903349670057475	3.889955545114974
Patient_vs_Control	O00468	AGRN	-0.299449	18.274517570468667	-3.93184	0.00483303	0.00929683	-3.48636	18.476655359665013	18.38808831206665	18.42152521780302	18.410700318004896	17.894759987631918	18.204924095267245	18.275737844717582	18.1237
Patient_vs_Control	O00470:O14770:Q99687:A6NDR6:A8K0S8	MEIS1:MEIS2:MEIS3:MEIS3P1:MEIS3P2	0.083049	13.194221559042328	4.672767838915091	0.00184376	0.0040748	-2.44065	13.143879488487777	13.137400460569976	13.17274610143221	13.156762087747088	13.275129825927015	13.225660426556932	13.20702163407629	13.235172447541332
Patient_vs_Control	O00471	EXOC5	-0.115958	18.88841062667297	-5.00541	0.00122802	0.00291421	-1.99626	18.958678889447157	18.97060691630456	18.915791151727845	18.940481978336365	18.77544892234785	18.844027840765833	18.870916752205893	18.831332562248257
Patient_vs_Control	O00479	HMGN4	-0.493379	13.821563541671894	-19.8452	8.253237569137592e-8	2.5006282460515644e-6	8.634270228601455	14.082509906714892	14.033246378176573	14.090581952548256	14.066673148252836	13.51310860048584	13.600668368621244	13.612011660431977	13.573708318143533
Patient_vs_Control	O00483	NDUFA4	0.0800012	12.819397865091892	0.9350594559853763	0.3785793278918065	0.43472027870199265	-7.78189	12.720457420012686	12.824729337482204	12.77816754265338	12.794234754000616	13.117926578397622	12.768546241650297	12.690385379200514	12.86073566733782
Patient_vs_Control	O00487	PSMD14	-0.0425878	18.422771253881876	-2.12365	0.0683336	0.0950242	-6.24873	18.441487856186914	18.493105759145347	18.400886260149537	18.44078081129003	18.411274675002065	18.39003166545637	18.401418146594107	18.40318485723063
Patient_vs_Control	O00488	ZNF593	0.0366819	17.599762867042205	1.7004676262643017	0.129546	0.16752631076669172	-6.86464	17.59457923727522	17.57877924384461	17.57484445923838	17.57748479250592	17.56015232725635	17.637197654540252	17.657	17.61806730481062
Patient_vs_Control	O00499	BIN1	0.16261090960972524	16.646766928325363	4.713336220238952	0.0017531	0.00390755	-2.38561	16.58518962036183	16.601998913269234	16.518484276869692	16.55617308358125	16.639882120459152	16.75027041672109	16.79270011040782	16.729436884932834
Patient_vs_Control	O00505	KPNA3	0.2025696602952749	19.37237155522717	15.069138021232177	6.349851413455899e-7	9.038326514825532e-6	6.392328280874285	19.268765352353576	19.295183570798983	19.250591677825895	19.26980629933968	19.483123868496182	19.46653505911854	19.470475710800923	19.474490903083552
Patient_vs_Control	O00506	STK25	-0.0471826	17.75209226224414	-2.03272	0.0784853	0.10748306163965754	-6.38485	17.766213816752018	17.736269239088937	17.818280740205964	17.781970536622552	17.771534224111374	17.72131950575366	17.694070662256383	17.727079373162248
Patient_vs_Control	O00534	VWA5A	0.0490546	19.40511250048474	1.5698751744352097	0.15715884249959083	0.19823352356745766	-7.04311	19.379486984872344	19.297846109012276	19.457159983940468	19.387847632361275	19.43713450495204	19.441220179690337	19.413468865664495	19.42673574338468
Patient_vs_Control	O00541	PES1	0.16782288332028017	18.136209578010373	4.585913582267743	0.00205559	0.00446326	-2.55928	18.029307014194632	18.031353746667307	18.087217361033716	18.061314423505262	18.322204548131044	18.19081564992741	18.14817485619783	18.21928902442577
Patient_vs_Control	O00559	EBAG9	0.054342464951982805	10.176687637398302	3.5032489721179245	0.00875645	0.015538647164832402	-4.12382	10.15549697427306	10.12395475995856	10.168851018229145	10.149762867228477	10.178297800592745	10.216406313709458	10.21774273843123	10.20298862676374
Patient_vs_Control	O00560	SDCBP	-0.0173923	14.627451853541658	-0.270013	0.7943539630631278	0.8270886408508427	-8.20884	14.60845872310463	14.791319424762571	14.512884784450348	14.631929131475069	14.735920572340614	14.554814880904916	14.560212086029496	14.62407522526561
Patient_vs_Control	O00562:Q9BZ72	PITPNM1:PITPNM2	-0.677911	18.98049752443913	-24.2558	1.8411176463891158e-8	9.67182809635491e-7	10.258989361954523	19.335879921041823	19.279799144321572	19.344556374160646	19.31757570921781	18.57035342790404	18.67115435860265	18.68443851216633	18.640222748098186
Patient_vs_Control	O00566	MPHOSPH10	0.12371675096472501	17.310958162245928	3.749796345157979	0.0062008	0.011521172133886974	-3.75447	17.234354873706824	17.191829329027865	17.311668704361466	17.25854623995811	17.439690233592046	17.360983637805955	17.319845532037604	17.370746747477558
Patient_vs_Control	O00567	NOP56	-0.208535	18.721032126012755	-11.2123	5.472546063852751e-6	4.171245444494028e-5	4.003552446809682	18.835953943617632	18.82673323107474	18.8167	18.821812686255264	18.569722848087984	18.631658831061692	18.648816740421104	18.61686037548022
Patient_vs_Control	O00571	DDX3X	0.024700606023493776	20.312344269385175	2.326570132321365	0.050137243221375596	0.0722237	-5.94003	20.297989751579827	20.30009440182217	20.301272760978705	20.3006	20.333531834534465	20.321834036389856	20.318722873939876	20.3247
Patient_vs_Control	O00592	PODXL	-0.176043	10.695243914463875	-1.41244	0.19752979549294175	0.24253616389599136	-7.24832	10.868968975993642	10.778445881035928	10.729062832231694	10.756583840255791	10.229343071915594	10.7296	10.862500563826284	10.607419050988163
Patient_vs_Control	O00622:O95389	CCN1:CCN6	0.10630837202351273	20.422651132555234	4.390205487788734	0.00263715	0.00551604	-2.83048	20.37999473715162	20.318747900748495	20.408824104188824	20.37042104408497	20.43112593760425	20.49876384259774	20.49925978782357	20.4741
Patient_vs_Control	O00623	PEX12	0.0980365	14.623677768079329	3.054017462913856	0.016769634981574764	0.027321374656725263	-4.81179	14.558574684228097	14.527586901370734	14.628799409257558	14.583677071957126	14.74515332877569	14.657341944016618	14.617310930582672	14.670977874446136
Patient_vs_Control	O00625	PIR	0.19690862440199197	13.49704715350368	4.5014789561318995	0.00228726	0.00490502	-2.67562	13.38555613073877	13.513576849780932	13.302136093720655	13.39310229097037	13.649322060516614	13.558738888215858	13.574469699898687	13.599475214187548
Patient_vs_Control	O00629	KPNA4	0.26197827948291774	22.019462023141855	8.69807	3.3086147808632746e-5	1.5894411269647127e-4	2.0019697182273237	21.871561357492386	21.85667596316427	21.929179274907035	21.89647493803789	22.22606560122636	22.131497968113056	22.09497628892596	22.149264793267875
Patient_vs_Control	O00635	TRIM38	0.0694059	15.651105292692936	1.1186834356066502	0.2974649859933252	0.351243	-7.59481	15.644266144176733	15.731862581369182	15.49153412480335	15.597946428556002	15.559203624559077	15.707020284672565	15.787036025180448	15.689973128226132
Patient_vs_Control	O00743	PPP6C	0.0739159	16.029882820610986	3.807248729278125	0.0057288	0.010753644815946659	-3.66941	15.98145227278393	15.9984	15.995788986715905	15.996096030835908	16.11727158354862	16.04969422358931	16.033414880604838	16.066982379113984
Patient_vs_Control	O00746	NME4	0.4310830860993917	19.022594602098955	18.745986089913167	1.2614600931665432e-7	3.346094492705657e-6	8.170629379428217	18.810215841062263	18.74853946785845	18.85851276755871	18.81094415971761	19.22605982166484	19.25191708957942	19.238468507780397	19.236099161569957
Patient_vs_Control	O00754:M0R2P5	MAN2B1:NA	-0.10177	22.347798680752675	-3.63734	0.00725015	0.013218625365009222	-3.92209	22.41305686319631	22.43560098789804	22.355	22.39105593578159	22.232331942417854	22.3115	22.345602996090943	22.29826858349265
Patient_vs_Control	O00764	PDXK	-0.123918	15.090195175737312	-5.10582	0.00108963	0.00263721	-1.8652	15.16582312941348	15.172658449381805	15.124014593815172	15.14612079022514	14.967286535680604	15.044380313638246	15.07226466855272	15.029012925191328
Patient_vs_Control	O00767	SCD	-0.0188788	10.267758010238827	-0.174193	0.8662747701476141	0.8892926151578628	-8.23275	10.21121643356154	10.16833542926611	10.422089999848229	10.30714770729304	10.552844441339516	10.182	10.044248582545038	10.254222432531847
Patient_vs_Control	O14494	PLPP1	-0.106042	11.040595372326294	-2.1229	0.0684127	0.095116	-6.24988	11.100892224601605	11.22462749012853	10.968578435372455	11.080366837777609	10.95128351199532	10.977096630056284	11.029721339918378	10.99219650876017
Patient_vs_Control	O14497	ARID1A	0.0443721	20.226742563085722	2.762495872230149	0.025884320819308193	0.0400694	-5.26457	20.196784523030967	20.19366890940806	20.21984992603595	20.207922611742337	20.283559150491676	20.239626814986497	20.22401460963195	20.248513959358323
Patient_vs_Control	O14524	NEMP1	0.0734635	17.338827034098472	4.435608982121936	0.0024878	0.0052684	-2.76708	17.306445818698748	17.267399179877973	17.330915778506093	17.303620332025222	17.35748031370249	17.38724328990029	17.383150059173687	17.374361500903284
Patient_vs_Control	O14530	TXNDC9	0.0503607	21.46225204027426	2.288926683910978	0.053101505984735765	0.0758801	-5.99773	21.450294453250688	21.441767549348523	21.423724202657912	21.43250047153426	21.429	21.50545383080231	21.527665445138418	21.487653357503092
Patient_vs_Control	O14531	DPYSL4	-0.271891	18.776054478571584	-5.06181	0.00114805	0.00275488	-1.92247	18.89904754118288	18.779650189403228	19.04214710903453	18.92715520580735	18.701481505960995	18.642742721430956	18.58079573643736	18.635415819315376
Patient_vs_Control	O14544	SOCS6	0.027184312874418026	12.928833418096255	0.27319742515920664	0.7919953774062065	0.8249857697318288	-8.20787	12.932764579788982	13.176175758042731	12.664130351283568	12.887894357520908	12.856771941942092	12.925859875194188	13.035426338655816	12.95164414234176
Patient_vs_Control	O14545	TRAFD1	-0.101839	19.22280586448735	-9.37666	1.9552036579909663e-5	1.0630600975912162e-4	2.5871338379110824	19.274391837087713	19.263265127156856	19.282855400010963	19.27438897836141	19.1693	19.17449344902655	19.172247847894916	19.17152268220787
Patient_vs_Control	O14548	COX7A2L	-0.0799411	14.906150167189827	-2.40937	0.0441907	0.0644072	-5.81262	14.93262299512856	15.023804396944376	14.884162068044075	14.943893471951649	14.923228709559336	14.834686008304573	14.83795940696636	14.86884428061968
Patient_vs_Control	O14558	HSPB6	0.6116525115891704	19.58801821379147	3.9980215381220265	0.00441972	0.00859267	-3.38992	19.179937076037127	19.22318466832702	19.4062	19.3194	20.346775398322404	19.75808427448933	19.579177585454595	19.891340620077905
Patient_vs_Control	O14562	UBFD1	0.17761403178173651	17.63717782870302	3.9252446304787236	0.00487643	0.00936551	-3.496	17.5194	17.52357893434514	17.590900072649095	17.55959569939057	17.85453002161335	17.688815597530812	17.635601200725517	17.72499255850588
Patient_vs_Control	O14576	DYNC1I1	-0.484653	16.95985889471764	-6.48785	2.4059081548612229e-4	7.585466902761939e-4	-0.200317	17.208525493966427	17.406260193552548	17.010831204638098	17.18312521877208	16.683029322555242	16.69412338670947	16.7683	16.724710617403176
Patient_vs_Control	O14578	CIT	0.050236986791905025	16.443549788058696	2.186127441153938	0.0621221	0.087301	-6.15434	16.42882984693579	16.452717951231907	16.379897981170206	16.412279399313057	16.421702445783556	16.477982225453523	16.505074331843737	16.469914122737784
Patient_vs_Control	O14579	COPE	0.0465978	17.84793927437816	3.819285518557723	0.0056349	0.010607381208808074	-3.65164	17.82926726917818	17.820707804050112	17.825079586261758	17.823506862317807	17.850955203551546	17.87842961835742	17.884447759039364	17.871120092269088
Patient_vs_Control	O14613	CDC42EP2	0.042625	12.842892036271426	1.5121267129261675	0.17101112620401648	0.21305634593784822	-7.11974	12.803521960222568	12.820448326949196	12.834967210166536	12.82738073468673	12.943891811137068	12.838754963703831	12.810083418755376	12.864087864550095
Patient_vs_Control	O14617	AP3D1	0.018093668298142518	19.707207433681813	0.8852615528620691	0.40321909944678846	0.4596886595098282	-7.8281	19.703904474969683	19.73927753605981	19.656551575552253	19.692908811549216	19.6896	19.717877164633347	19.739819158447737	19.717719609871153
Patient_vs_Control	O14618	CCS	-0.0220318	15.844609786261671	-1.40658	0.19919462936012344	0.24437486283394177	-7.25571	15.847372665318431	15.860489003660684	15.85681376756535	15.857827381144777	15.86984176344299	15.821108014803912	15.809696599145264	15.833729095011964
Patient_vs_Control	O14639	ABLIM1	-0.147722	16.916141091154387	-3.7668	0.00605692	0.011288312914219402	-3.72926	17.009801299868933	16.90873773616272	17.050931739762575	16.990537014901534	16.757549763021725	16.883286317283094	16.888767900812923	16.839516957421587
Patient_vs_Control	O14640:P54792	DVL1:DVL1P1	0.10563052032598463	15.679796437004034	8.027189404247745	5.763372301212889e-5	2.4650028012211927e-4	1.384925454918399	15.628861945426028	15.603782797854311	15.646954214781418	15.628325749302412	15.725058911207752	15.738964995761556	15.734616096586016	15.731806785112784
Patient_vs_Control	O14641	DVL2	0.036270549153339715	14.616511933790978	1.623197545691728	0.14528603556139996	0.1854034658632196	-6.97107	14.58532494633634	14.623862609256806	14.583947909324792	14.6004	14.691401122308807	14.612075694248444	14.599627373668978	14.635484643244352
Patient_vs_Control	O14646	CHD1	0.11890578124591755	18.43044634708651	6.040868139960109	3.819987889239055e-4	0.00110645	-0.71143	18.374079041525334	18.323442335880827	18.41245974764393	18.373992700804116	18.47781223380588	18.501829768090968	18.491708869944656	18.488246078996372
Patient_vs_Control	O14647	CHD2	-0.200063	17.68428229550516	-14.7714	7.354192424900979e-7	9.871381082100542e-6	6.2300061805823805	17.781846560666438	17.762603279000867	17.805897770593177	17.786908358124748	17.595829822087584	17.584196244552356	17.573497053778553	17.583479275237544
Patient_vs_Control	O14653:E7EQ34	GOSR2:NA	-0.137461	14.516644723846316	-5.60939	6.108477635938668e-4	0.00163209	-1.22913	14.600672101678269	14.567381832992456	14.59140189221433	14.58204488875577	14.381016827434692	14.472482583660325	14.490808694435234	14.44734896959945
Patient_vs_Control	O14656	TOR1A	-0.221583	17.141412282899736	-5.77261	5.100415179507162e-4	0.0014017	-1.0304	17.268382064058315	17.324662025827738	17.17473594904912	17.241034863739493	16.956937829904614	17.042076363685943	17.09024020121901	17.03322896571366
Patient_vs_Control	O14657	TOR1B	-0.18961	21.24206706596242	-5.6092	6.109729939554115e-4	0.00163209	-1.22936	21.35210507463795	21.26182274705028	21.395229341480707	21.33833057621711	21.08247393024442	21.180800493442863	21.181077126949894	21.144697237676137
Patient_vs_Control	O14662:H3BU86	STX16:STX16-NPEPL1	0.030503304140594878	18.245067856680045	1.4622005502310973	0.18386548572568556	0.22747979952032463	-7.18475	18.233509812062483	18.27696794913967	18.18407910175621	18.22470795548063	18.242516666921713	18.258074123504656	18.278699661683945	18.261987582891056
Patient_vs_Control	O14668	PRRG1	-0.359357	17.36795886788999	-3.31989	0.011380352280561277	0.019493157952769985	-4.4026	17.58711204224543	17.26734054556009	17.777506691824737	17.55858971100438	17.02313890892203	17.288818475545916	17.262538075978842	17.17862649203849
Patient_vs_Control	O14672	ADAM10	-0.0474232	21.63597669939532	-2.99335	0.018342	0.029579	-4.90578	21.663764322312247	21.68741686239087	21.631489403367397	21.656082600376124	21.59339767419984	21.613646897710247	21.62876166790153	21.613254166904333
Patient_vs_Control	O14678	ABCD4	0.21577188122876123	12.846648806036075	3.431061332680781	0.00970307	0.0169627	-4.2332	12.781822113195032	12.705905299645678	12.739422660245802	12.727901388600268	12.76565542578027	13.020866643739067	13.07804995580889	12.953566961273596
Patient_vs_Control	O14681	EI24	-0.219573	16.07237512935276	-7.77086	7.196746856105081e-5	2.93087816750024e-4	1.1381406080287526	16.20046259547215	16.17006373853698	16.180731516518968	16.177389553867318	15.882252417989545	15.990483886269992	16.01537482297868	15.962242503188456
Patient_vs_Control	O14682	ENC1	0.0860252	12.539280079969338	2.3785627631868635	0.0463151	0.0670751	-5.8601	12.481565621897245	12.426569303873142	12.570195994511732	12.506739070641457	12.649374656146607	12.572494378571774	12.527514059493855	12.579787554618887
Patient_vs_Control	O14683	TP53I11	-0.00143315	20.84386871200112	-0.0204403	0.9842197923319478	0.9881442215877744	-8.24964	20.868525313892757	20.661394503736943	20.99609041649849	20.852330908898697	20.74342267848275	20.906221104891447	20.88613002789344	20.83683474171444
Patient_vs_Control	O14727	APAF1	0.010406962770247219	17.235112890268717	0.29275256656960547	0.7775630948068908	0.8128512123521713	-8.20167	17.206503616974747	17.228547398907295	17.247166589717903	17.23742002993441	17.343601647442792	17.20731276413928	17.170182248444387	17.240168826588903
Patient_vs_Control	O14730	RIOK3	0.5128820088046275	20.005495591836713	11.586662853600327	4.319230715614955e-6	3.512140610848597e-5	4.266633531286226	19.769251223604904	19.82787684495597	19.663006337525044	19.73608394365168	20.17032522395105	20.278084698299125	20.33455159443825	20.26478486826768
Patient_vs_Control	O14733	MAP2K7	0.16654012036115162	17.72132521130566	5.185474061939002	9.920137954640689e-4	0.00244424	-1.76224	17.645564613028913	17.553511848069135	17.710395960218232	17.64274818318404	17.77417986891202	17.82867900594801	17.81385753649952	17.801664674585403
Patient_vs_Control	O14734	ACOT8	-0.157407	15.572234562734476	-11.693	4.0434086428941465e-6	3.339928722897405e-5	4.339970376543878	15.653131577892514	15.62661490393629	15.671727342659713	15.652277478088328	15.484633986044631	15.500507395065782	15.496295502627344	15.49268831556121
Patient_vs_Control	O14735	CDIPT	-0.316759	16.932977549454524	-7.05412	1.383431262216848e-4	4.8519765017807033e-4	0.41274395599871205	17.111086040818936	17.1746	17.00158639394644	17.078165350738747	16.68490762757309	16.78938236462879	16.846503761218415	16.777599037273177
Patient_vs_Control	O14737	PDCD5	0.11942424452435674	12.727705797270302	2.187152653145262	0.062025	0.0871813	-6.15279	12.646105254504718	12.557226725090946	12.78447379394223	12.684168926494609	12.887515032951464	12.773941504154948	12.704772135173023	12.78344300585048
Patient_vs_Control	O14744	PRMT5	0.0965697	18.564604106106195	6.246396323977593	3.079422237352924e-4	9.261096036717897e-4	-0.473319	18.522188759535595	18.53562160019122	18.49461559547202	18.51285103725737	18.586380509679145	18.61815434808467	18.63343059766935	18.613590400960195
Patient_vs_Control	O14745	NHERF1	-0.800858	11.92268008459639	-14.7555	7.412676614406622e-7	9.924461074193335e-6	6.221247056507343	12.360134367955348	12.307584717313892	12.312012135846228	12.312706105861851	11.359432811708944	11.577265878662208	11.630439948279156	11.521864711143492
Patient_vs_Control	O14763	TNFRSF10B	0.0706705	19.306611953440346	1.4965432991269978	0.17493384020849306	0.21746116806306032	-7.14016	19.29476416657281	19.347092027513828	19.185733260027614	19.257517425710677	19.23591656344545	19.363243449836773	19.42392461294472	19.344704121470876
Patient_vs_Control	O14772	FPGT	-0.0959199	15.889183540433539	-4.18168	0.0034605	0.00695145	-3.12533	15.9229	15.94597917101894	15.938807229795788	15.94091492306061	15.903888506060415	15.81956581381488	15.799967693591826	15.841472359321644
Patient_vs_Control	O14773	TPP1	-0.333386	16.168275707636376	-5.33994	8.290155070417541e-4	0.00210922	-1.56511	16.37759613328681	16.296111614340056	16.341421464725276	16.3247	15.814799699819275	16.068254861557442	16.122873969676974	16.000403031534084
Patient_vs_Control	O14776:Q5VWI1	TCERG1:TCERG1L	-0.0150747	18.11518111636021	-1.03459	0.3327328117637771	0.3879934512135261	-7.68362	18.129940435385933	18.118344857704987	18.121786853214264	18.120801694919713	18.075928155136666	18.11858846993004	18.12853715590417	18.107521308685904
Patient_vs_Control	O14777	NDC80	1.9009792680332218	29.54113712236171	6.141742477125365	3.434397889523776e-4	0.00101571	-0.593895	28.380571563136563	28.519684171171537	28.799366603096836	28.662967615975468	31.42053331452055	30.20473452598813	29.852995063990655	30.48824412101395
Patient_vs_Control	O14786	NRP1	0.4961834042785398	22.852198893457977	11.393584271262498	4.875734460803727e-6	3.824125997077209e-5	4.1319252836323574	22.61630674816588	22.70632638869537	22.50208735055026	22.59170827786333	23.043204353739306	23.10137297319181	23.152660401369147	23.103924654088715
Patient_vs_Control	O14787	TNPO2	0.012350272062382928	15.182096576087119	0.8148319946287562	0.440012	0.49590503759979854	-7.88991	15.18316391308858	15.160379881889911	15.185210341422088	15.17493162382313	15.156823454261144	15.20101898182064	15.207486431404796	15.187757980986657
Patient_vs_Control	O14795	UNC13B	-0.124658	18.681190683160235	-4.47097	0.00237785	0.00507396	-2.7179	18.755773112389782	18.79062511724109	18.69197093345102	18.735710537502673	18.563304261639292	18.6288	18.662805035496326	18.620564387279895
Patient_vs_Control	O14798	TNFRSF10C	-0.340176	12.415215892749291	-15.4301	5.333653264427103e-7	8.046763664637749e-6	6.584974963568392	12.591614360655646	12.630754087159549	12.539335636332083	12.579510539337004	12.2158	12.246867366568818	12.271061485382164	12.24674774613887
Patient_vs_Control	O14802	POLR3A	-0.0155015	17.406939816833333	-0.730606	0.4869806954031265	0.5414851587990909	-7.95814	17.427461115031843	17.39965270314636	17.41973677483093	17.41191163546726	17.34334060802696	17.41970238157436	17.435	17.39871657168496
Patient_vs_Control	O14807	MRAS	0.15805415894202568	17.687046457766115	3.5596806391763716	0.00808526	0.0145327	-4.03869	17.59279782888369	17.5111	17.707292311706926	17.62093426916439	17.836321338003486	17.759867870585452	17.705494272885723	17.762610667473847
Patient_vs_Control	O14818:Q8TAA3	PSMA7:PSMA8	-0.0726568	17.59995642128998	-2.6389	0.031185745678132492	0.0471369	-5.45686	17.629489439482747	17.706754144380106	17.57635331203855	17.63254246419417	17.591344592542754	17.54279269820902	17.554306265108554	17.566068454363947
Patient_vs_Control	O14827	RASGRF2	-0.0757943	17.2776	-1.64576	0.1405160010730887	0.1800399789148436	-6.94023	17.304205257938833	17.203187128548517	17.42601567334183	17.328383768905223	17.292840990905788	17.241524013492434	17.188577966549307	17.235671839262885
Patient_vs_Control	O14828	SCAMP3	0.13472781816069812	18.544524363881827	6.949024862990645	1.5290900183151482e-4	5.276661301388097e-4	0.3017481082881375	18.478532571442635	18.52265237845012	18.434532288500613	18.47292458081255	18.604378571366492	18.60661157108257	18.623074667085373	18.613488282314272
Patient_vs_Control	O14832	PHYH	-0.00787148	15.860773550727874	-0.0905497	0.9301968544682555	0.94403	-8.24524	15.804812900665103	15.88373831973288	15.8882	15.882	16.12042782943115	15.768804903673276	15.68086931173649	15.8572
Patient_vs_Control	O14841	OPLAH	0.0742733	12.012516613403722	6.400412500611601	2.628807273598769e-4	8.192180409543733e-4	-0.298355	11.97285126717723	11.98846052801916	11.96512229637158	11.975085830735264	12.060388213775791	12.043987036976285	12.044136894806636	12.050100839367833
Patient_vs_Control	O14863	SLC30A4	-0.0772087	15.773507091296777	-3.46038	0.00930603	0.0163702	-4.18871	15.821499262449812	15.84805026379475	15.772755324720968	15.806140848440238	15.69234219909216	15.74251982426661	15.76854682203254	15.736202185577133
Patient_vs_Control	O14867	BACH1	-0.0505557	14.007756973405728	-0.958476	0.36738638931800616	0.42319851945103026	-7.75946	14.065881305306036	13.9556	14.08152149212486	14.02912570283253	13.840075401398131	14.041393261707364	14.068541834544938	13.979906075073764
Patient_vs_Control	O14874	BCKDK	-0.104501	24.390102524230468	-5.43955	7.39677179868077e-4	0.00191869	-1.43975	24.447000461804507	24.397896638425856	24.479915096894302	24.44460009359272	24.318776800411943	24.351507739935467	24.34480943919544	24.336313923583504
Patient_vs_Control	O14879	IFIT3	-0.209204	19.14978462056182	-1.66809	0.1359368814934346	0.17472471548408017	-6.90951	19.33025549171465	19.38504699183061	19.082754645245945	19.219489675631095	18.70634372506204	19.132114345189898	19.29218731530369	19.05008477451663
Patient_vs_Control	O14880	MGST3	-0.47697	16.166159939651166	-9.83804	1.3925753272102839e-5	8.260426514451254e-5	2.964676300175599	16.436157426962602	16.426405712707812	16.363149097868938	16.39286743608303	15.787977918093407	15.968945108822853	16.025204911137603	15.928571905533095
Patient_vs_Control	O14893	GEMIN2	0.22242141541902072	6.10239	5.607334908071757	6.122482750883597e-4	0.00163401	-1.23166	6.01179	5.9113239389948955	6.050270904551681	5.991344407236323	6.125264373605001	6.255533090830289	6.262723870592227	6.210893028165765
Patient_vs_Control	O14907	TAX1BP3	0.00501652	17.362592159008546	0.352547	0.734028	0.7750024823809405	-8.18015	17.358835484720803	17.388304955818434	17.335075470108244	17.358119689518468	17.369703023325584	17.35884701516639	17.36576759870705	17.36608403470341
Patient_vs_Control	O14908	GIPC1	0.0684633	20.52845894681034	3.321288548109209	0.011357507058291843	0.019467726887241087	-4.40047	20.504870000809852	20.462207240842616	20.51629167953277	20.493540185658514	20.51677194298843	20.582880665109776	20.589495922628338	20.56161393691242
Patient_vs_Control	O14910	LIN7A	-0.0383732	15.288770349243249	-0.665224	0.5256226107762338	0.5798604477848708	-8.00663	15.274953228396075	15.41384935588512	15.233488840740462	15.309536306556817	15.411768913507446	15.205925736829585	15.18748664273352	15.273153769296966
Patient_vs_Control	O14920	IKBKB	0.00663384	18.337106125416074	0.20502485284024916	0.8429498051967579	0.8692585055142954	-8.22616	18.351842406775763	18.370190364538576	18.288082521716596	18.32504152806186	18.259625239216778	18.360265466717575	18.40002584756172	18.341775628739715
Patient_vs_Control	O14924	RGS12	0.4645497798177267	14.463250560367673	5.4360559086950575	7.426237822150281e-4	0.0019236	-1.44412	14.215433952542588	14.008154377542803	14.445803542793652	14.2545	14.771217366666884	14.708851235292007	14.614382278065138	14.687650921082106
Patient_vs_Control	O14925:Q5SRD1	TIMM23:TIMM23B	-0.0709987	19.229998060782258	-5.5312	6.667850104426339e-4	0.00175898	-1.3256	19.260092874507432	19.268589216512197	19.26636055017481	19.266946931617337	19.218238709761824	19.18633709845533	19.178835079343276	19.194584025885856
Patient_vs_Control	O14929	HAT1	0.0885742	16.619889698451665	3.9688791074253125	0.0045968	0.00889868	-3.43232	16.56727617180862	16.535438388801392	16.618104886288016	16.58159088077894	16.702190838922203	16.658737224285744	16.63304535063363	16.662733846094774
Patient_vs_Control	O14933	UBE2L6	-0.175389	17.07921979506864	-3.55461	0.00814331	0.014613533472757878	-4.04633	17.198919425820442	17.19033472648405	17.12356085160394	17.15484254905263	16.84960247617219	17.03323086065368	17.090785068957096	16.992482401805084
Patient_vs_Control	O14936	CASK	-0.307015	19.668569094523455	-19.6478	8.891468463358175e-8	2.6608812589934996e-6	8.552982525536034	19.825019773750732	19.78926372399576	19.850133962707424	19.82388905556542	19.503130701430155	19.524449485290837	19.518741793360395	19.513924260086924
Patient_vs_Control	O14939	PLD2	0.24442110864637456	17.32231466387414	4.0138289353260355	0.00432677	0.0084446	-3.36697	17.18736059714334	17.368591848924023	17.054414976675915	17.190049015460524	17.495338495763875	17.399682346512176	17.43270490064853	17.45037512986471
Patient_vs_Control	O14949	UQCRQ	-0.222064	18.49717835208812	-12.0217	3.3087127728441763e-6	2.8678926832096736e-5	4.562773903163295	18.61859111325061	18.592060978088707	18.61590986819472	18.606279626649624	18.340874905279513	18.403444222633215	18.414641443757365	18.385624658851206
Patient_vs_Control	O14964	HGS	0.0218822	19.401494873322207	1.5119042332042418	0.1710665669330787	0.21308906034550334	-7.12004	19.39741717815003	19.394630488800484	19.38212333954659	19.388044014830555	19.38203121451669	19.42152987529864	19.433574754721185	19.41260812071348
Patient_vs_Control	O14966	RAB29	-0.233633	14.87075823650312	-4.03676	0.00419565	0.00822239	-3.33373	15.020927176696722	15.056127088955414	14.901940336583596	14.971305222559842	14.604630607787074	14.790392273958224	14.86425718563046	14.756485999853624
Patient_vs_Control	O14967	CLGN	0.7315314747474986	23.815279117468982	7.519651946904998	8.998603271290055e-5	3.461949477711274e-4	0.8899898039861256	23.51389340977662	23.493170095182013	23.36547110993465	23.42551890548765	23.89566955548715	24.265486865046103	24.38017374092876	24.18284925790892
Patient_vs_Control	O14972	VPS26C	-0.0234021	15.839287117339358	-0.868677	0.41167785322177475	0.46794391099399113	-7.84303	15.861756730990042	15.900305696832252	15.798427189997952	15.843463044289493	15.778506599361394	15.83503826000092	15.86743920708095	15.82936021016186
Patient_vs_Control	O14974	PPP1R12A	0.023740828732524477	18.63462377833148	2.0455177224847794	0.0769719	0.10562835914319799	-6.3658	18.621400689711855	18.638077403504436	18.609635317600368	18.621900045044217	18.651969845029452	18.642140870414035	18.64484063624244	18.64702541910503
Patient_vs_Control	O14976	GAK	-0.107792	19.23394080697429	-4.51657	0.00224385	0.00482184	-2.65476	19.301718130580785	19.30327691210933	19.264192588963763	19.282159423615784	19.118320277566824	19.19729480005249	19.223919210335335	19.1806
Patient_vs_Control	O14979	HNRNPDL	-0.0905072	15.389662779321633	-3.20978	0.0133485	0.0224122	-4.57146	15.416653083859511	15.444030861652326	15.439055370401082	15.439926224030176	15.424675586458374	15.317	15.291269783126005	15.344650683231894
Patient_vs_Control	O14980	XPO1	0.17801931823305495	17.96380026924176	7.638022514356256	8.093441190661436e-5	3.2031603021251924e-4	1.00771	17.860276795743715	17.87804337903417	17.881736816536627	17.879105449186426	18.116725348937987	18.03169389531494	18.00995845094718	18.052862018233032
Patient_vs_Control	O14981	BTAF1	0.0777336	18.426137711689996	7.350639015587212	1.0493413159984283e-4	3.919330071314846e-4	0.7193936236841161	18.38551493922167	18.385167252246408	18.390399833826137	18.388	18.47281745984748	18.46284627968399	18.45943095110777	18.464923287508512
Patient_vs_Control	O14983:P16615:Q93084	ATP2A1:ATP2A2:ATP2A3	0.00475583	20.250545979438996	0.3177311815850806	0.7592629140845497	0.7973289014802818	-8.19315	20.249553479415333	20.27782314120304	20.22004399192321	20.24525164436605	20.245862880463527	20.2502	20.261682732488488	20.253968995554622
Patient_vs_Control	O15013	ARHGEF10	0.26364016740530616	19.345857637009928	12.854500506084165	2.0341623483158075e-6	1.994623875288411e-5	5.102891953612939	19.225965512222565	19.220712103932307	19.19976242502089	19.209710172053327	19.42485033442968	19.49354717749391	19.514350888120703	19.47796248280604
Patient_vs_Control	O15020	SPTBN2	-0.610849	19.235673863571943	-34.4553	1.314901502478314e-9	2.201017927891316e-7	13.033089278159618	19.536091440794195	19.579362999683987	19.509456438778052	19.53948242794541	18.951108654631273	18.91706665758652	18.92125334548967	18.93156894366644
Patient_vs_Control	O15021	MAST4	0.0514515	18.70784993884412	1.5546598987481242	0.16070596253707797	0.2022186693857907	-7.06345	18.696473205354707	18.74145535745945	18.617937521623308	18.672630580869715	18.6684	18.74451950039172	18.785685141670136	18.73571602693353
Patient_vs_Control	O15027	SEC16A	0.037247453787131235	19.58738384221805	2.0495	0.0765063	0.10504867043848631	-6.35985	19.57902520473834	19.57106165238567	19.559629863959668	19.565323740214264	19.56065510058161	19.620211348992115	19.637031829168404	19.60613199770432
Patient_vs_Control	O15031	PLXNB2	-0.192104	20.276983946835877	-12.0794	3.1959444334774076e-6	2.7914816092406734e-5	4.60129	20.371074951508092	20.40762374164334	20.342680404770064	20.370764845821913	20.188473873692327	20.17265604640857	20.18046211935076	20.18213559149193
Patient_vs_Control	O15037	KHNYN	0.0217601	15.648512413311746	0.623747	0.5510939068575631	0.6036735235334422	-8.03529	15.615372947471656	15.623450183101223	15.665854083461117	15.645852214134232	15.75803182143246	15.630051776502915	15.590685719587013	15.658800560803355
Patient_vs_Control	O15040	TECPR2	-0.043465	17.57536550518536	-1.47615	0.18018889436829244	0.22342321390342526	-7.1667	17.580456929796647	17.56729041548798	17.635796292768607	17.604848288064556	17.62799069006635	17.534747807826044	17.49927609252582	17.55251752494687
Patient_vs_Control	O15042	U2SURP	0.025144009779026533	18.143204608710374	1.7851615095114464	0.11413278573068923	0.14970317970280092	-6.74548	18.12849073257276	18.157795058118193	18.10720539932678	18.129039225265707	18.16435411639283	18.14842323336284	18.1536	18.156719323877983
Patient_vs_Control	O15047	SETD1A	-0.0283522	15.232673196424235	-0.855407	0.4185377019917552	0.4747067878135751	-7.85482	15.242696228265388	15.16161704643197	15.3278	15.25528552844752	15.23954649073519	15.22613760843835	15.192811703306804	15.215492634032058
Patient_vs_Control	O15056	SYNJ2	0.2558691730696765	19.468728899887093	8.739895826661574	3.1998987741362844e-5	1.547260624986087e-4	2.0391289605322083	19.322618142174967	19.327284160466903	19.365607348185172	19.347667602581986	19.67727037270745	19.573011425800846	19.54025960670624	19.596112540473193
Patient_vs_Control	O15061	SYNM	0.8140051410003792	19.043491976433415	17.569142326066586	2.041909729222729e-7	4.490971338188062e-6	7.642515658106429	18.610752352533567	18.723698863102783	18.57417252411609	18.637333883980464	19.56122542649807	19.400116961660036	19.38719496022535	19.45344083935096
Patient_vs_Control	O15063	GARRE1	0.3005927503386303	16.024605755882895	5.497758118914163	6.924220045204371e-4	0.00181873	-1.36712	15.908954188609568	15.911918004511874	15.81614788665976	15.860217443073116	16.020880992164436	16.218101312073546	16.284258436212273	16.176367783758586
Patient_vs_Control	O15066	KIF3B	-0.00676411	18.409115094046363	-0.533072	0.60925	0.6589751536932157	-8.0921	18.4176	18.405547451609166	18.41535466227709	18.41145564323548	18.38331125557144	18.41412291495853	18.41998658874737	18.40551139621073
Patient_vs_Control	O15067	PFAS	0.0805831	19.62795987931496	2.3919385995673865	0.0453803	0.065865	-5.8395	19.566851817672408	19.566379500930783	19.621415838184433	19.59602618536093	19.76075392789321	19.642087172452634	19.602747960598712	19.667416631426587
Patient_vs_Control	O15069	NACAD	0.2526807799586841	15.087183461410879	15.831414884890673	4.4134113685367305e-7	7.177445392662629e-6	6.794005397989817	14.956285983771162	14.934030771180796	14.988531317697491	14.964524213076702	15.234483865236022	15.211313778727678	15.195732918617288	15.212564842979896
Patient_vs_Control	O15072:Q5VU43	ADAMTS3:PDE4DIP	0.22541394743518595	20.1848	21.15953685615361	5.114862588927492e-8	1.8681190105278714e-6	9.155139893155216	20.073553702915373	20.077729584654232	20.06604741561754	20.071224309186064	20.2911	20.298673114067643	20.302650706880804	20.29775465232452
Patient_vs_Control	O15078	CEP290	0.23627806609718505	19.034839304482986	2.816111552688982	0.0238836	0.037336390756267865	-5.18114	18.972769641295525	18.944404042415716	18.85296188008177	18.896665521944563	18.904771960957497	19.228158347666422	19.324794776167387	19.1542
Patient_vs_Control	O15083	ERC2	-0.157257	12.324764069052659	-8.75085	3.172103937107858e-5	1.539050029818045e-4	2.0488321467811073	12.408672833767453	12.43636360817318	12.36956513683603	12.398967830546914	12.221787615062446	12.24839452634293	12.267047296355004	12.247313705337309
Patient_vs_Control	O15084	ANKRD28	-0.028028	16.375038134816148	-1.01094	0.3432189596809434	0.3984395617790539	-7.70766	16.377103369003436	16.44982985961005	16.341526895545993	16.38774835249643	16.411782355513875	16.334413712182076	16.334797527072293	16.36310300710503
Patient_vs_Control	O15085	ARHGEF11	-0.0434318	16.6655	-2.26275	0.055266304965567566	0.0786503	-6.03775	16.69550019282487	16.714155197603333	16.65696606226379	16.682402294679516	16.606597411749686	16.651253575234225	16.672643548731475	16.644801885344314
Patient_vs_Control	O15091	PRORP	-0.0135828	19.1605	-0.287469	0.7814539392497101	0.8164511209493777	-8.20339	19.19832881921666	19.18332365558687	19.131417707427165	19.1562	19.01639000337213	19.195209443028578	19.248887759319047	19.15442034634475
Patient_vs_Control	O15111	CHUK	0.011114939398915169	17.68065057733312	0.4707060497616911	0.6510950809666824	0.6979295773955835	-8.12636	17.688419559508297	17.693968015506023	17.648680801930674	17.669304053589684	17.626821137711797	17.7021	17.72895978170122	17.686926306071385
Patient_vs_Control	O15116	LSM1	0.23351728459003773	11.876664717368362	6.265255626122211	3.019888183094183e-4	9.108312066482332e-4	-0.451737	11.738165535013072	11.72230982320463	11.809230016874388	11.769918925201283	12.090524096510284	11.968537271756537	11.92261889819032	11.99201317219638
Patient_vs_Control	O15118:Q7Z442	NPC1:PKD1L2	0.29035624805634797	14.566834316623785	6.8867169217720186	1.623476225471457e-4	5.54480535009543e-4	0.23535312345994264	14.410859922423692	14.53447982194062	14.325646849561434	14.415638176456696	14.756019787396829	14.6788	14.697337141627894	14.715920038321922
Patient_vs_Control	O15120	AGPAT2	0.0974121	14.288329193105463	3.864815731172742	0.00529444	0.0100442	-3.58459	14.23533732530984	14.304704613053268	14.182912685326489	14.235538026851083	14.353854874570072	14.320617343310968	14.334371103434494	14.339297572987492
Patient_vs_Control	O15121	DEGS1	0.0942924	16.675692664799666	2.3241119316027623	0.0503256	0.0724665	-5.94381	16.654800657620484	16.644459248957734	16.596006448434135	16.61891952235736	16.606523320940134	16.75757453075198	16.803749139101324	16.723508450234185
Patient_vs_Control	O15126	SCAMP1	0.072527	22.437570897967856	3.4763508599857014	0.00909711	0.016041319628002218	-4.16451	22.394297863405285	22.447915372813725	22.36338926895261	22.39962701988404	22.503259881210457	22.456484406783616	22.460155581104473	22.475437789588646
Patient_vs_Control	O15127	SCAMP2	0.0901803	16.825119641080192	2.7843449185247273	0.0250488	0.0389577	-5.23057	16.789874149059766	16.851748786137723	16.707571041581065	16.77092398891116	16.824487967707253	16.87279326085463	16.910792925472567	16.872765008917376
Patient_vs_Control	O15143	ARPC1B	-0.153138	13.546437043693718	-4.49283	0.00231256	0.00495636	-2.6876	13.642392563939469	13.659664238653718	13.576152441225451	13.613815841666122	13.383181592277085	13.491561515171554	13.533493073068446	13.4712
Patient_vs_Control	O15144	ARPC2	-0.0342489	18.37346930401547	-1.47848	0.17958187773144338	0.22274619860625097	-7.16368	18.38131954448809	18.440707215595324	18.351012175646456	18.389336108440737	18.39564747273895	18.335223876846005	18.33644663379178	18.358061404576414
Patient_vs_Control	O15145	ARPC3	-0.00564436	16.744122987794565	-0.225653	0.8274352186167763	0.8550710396744551	-8.22117	16.732196205587485	16.77878308216499	16.727856232436185	16.748945147854226	16.805337700702964	16.715311688956152	16.702200249580763	16.74235359507376
Patient_vs_Control	O15156	ZBTB7B	0.0319266	24.01108101793173	0.19016112410773708	0.854175	0.8794682881690222	-8.22947	23.885010833699013	23.90091798111933	24.156754647365897	24.0378	24.515737379445422	23.88572836356586	23.68343780917425	24.02327375512696
Patient_vs_Control	O15160	POLR1C	-0.0253494	15.842130190640038	-1.54237	0.1636243667020939	0.2051837756583702	-7.0798	15.862872061248076	15.834654191467934	15.8678	15.853939667638215	15.794517149480702	15.844105220646671	15.85041587197228	15.828783773857031
Patient_vs_Control	O15162	PLSCR1	-0.31913	20.445479269563727	-3.5664	0.00800909	0.014418733191475684	-4.02858	20.661941011924338	20.67189024899363	20.50486933818322	20.58147653054882	20.032804490067228	20.35605273147938	20.466300445952225	20.288499359360976
Patient_vs_Control	O15164	TRIM24	-0.365396	12.969363479641764	-15.1707	6.043378412571258e-7	8.77896946738737e-6	6.446989157686724	13.146933449759024	13.0968	13.20617047941776	13.158297235958363	12.811054214248356	12.78815539001609	12.762743301078125	12.784708570311986
Patient_vs_Control	O15169	AXIN1	-0.0447316	10.958464609109496	-0.632706	0.5455308561227225	0.5991075818029958	-8.02924	10.9554	11.16325790851555	10.831017888374763	10.973607442968747	11.04225736019891	10.871090243385067	10.888664370325811	10.942383267246925
Patient_vs_Control	O15173	PGRMC2	-0.248093	13.938053700042511	-18.9541	1.1619976032432212e-7	3.1778676025775288e-6	8.260505267895741	14.056445395248058	14.06776400958636	14.06077730562885	14.06341374564581	13.838768487598127	13.805082099655191	13.798	13.814181648817485
Patient_vs_Control	O15211	RGL2	0.2614307137829712	21.338483972541063	20.74669451408189	5.9254514693448186e-8	1.977590800571751e-6	8.995235691609597	21.20381168299136	21.196643091959267	21.220670707308944	21.20994898033873	21.48700955409958	21.46534998675583	21.45564519011795	21.468792586756848
Patient_vs_Control	O15212	PFDN6	0.1361456433244328	21.429680695555255	12.98334599662456	1.8915906171872756e-6	1.891104377760523e-5	5.183515126929569	21.360270381069817	21.358358682570906	21.36550030860618	21.362302123325257	21.50375721400995	21.496371184421648	21.493251717400675	21.497633953037603
Patient_vs_Control	O15213	WDR46	-0.0563266	15.84262995436334	-2.45146	0.0414472	0.060748159714022795	-5.74762	15.867667062474847	15.815735786382112	15.923387166377852	15.87638292757915	15.83001985996762	15.818772850621126	15.79654999962406	15.812523981879956
Patient_vs_Control	O15217	GSTA4	0.18762396844984508	15.496468892280552	8.339766613497584	4.429811732864245e-5	1.9979299118823174e-4	1.6774557854814542	15.392077074475074	15.371568964576314	15.438382851684128	15.408598741486996	15.637943860478126	15.580201681574756	15.553831610440335	15.58914635352868
Patient_vs_Control	O15226	NKRF	-0.0895009	17.575478527423808	-3.0899	0.015906994358850558	0.0260759	-4.7563	17.638608436728088	17.593446808582232	17.632201613411983	17.616659141801467	17.450515374775712	17.561067063766295	17.581461863555276	17.529867916769405
Patient_vs_Control	O15228	GNPAT	0.14487264250541187	18.614912379080668	9.402530330462794	1.9176260734939492e-5	1.0528199690716405e-4	2.6087245291473504	18.534474041310837	18.544786736519832	18.54583169785479	18.54481175562637	18.72257112436859	18.675624481968605	18.663803647840457	18.687395547155855
Patient_vs_Control	O15231	ZNF185	0.8370120881900718	18.06450992770518	20.927846229847642	5.553129016093319e-8	1.930902289310163e-6	9.065804299338385	17.649380702294557	17.53574941385532	17.744733529101644	17.654151889189052	18.471653106586484	18.50531718779426	18.475926829596567	18.479166763223557
Patient_vs_Control	O15234	CASC3	0.17766578348428652	16.92660870043323	7.142584911812598	1.2727445776112268e-4	4.54676169555635e-4	0.505234	16.822373859895652	16.8326	16.853092856011063	16.843079368088738	17.083545913325946	16.994410296549816	16.9686	17.015193033209744
Patient_vs_Control	O15235	MRPS12	-0.220046	17.028364860746912	-13.0721	1.7999138011086973e-6	1.8485190683116327e-5	5.238625180676193	17.147482658282318	17.12554419808964	17.14393715548921	17.13658703540972	16.878636332882014	16.933289934864597	16.943510897656786	16.9179
Patient_vs_Control	O15243	LEPROT	-0.129614	13.78978019280222	-2.29005	0.053010265461006886	0.0757794	-5.996	13.884425828730349	13.938454083907317	13.757321121310875	13.838147856343271	13.590669990826353	13.754005049121924	13.827178281544231	13.728039330633443
Patient_vs_Control	O15254	ACOX3	-0.0675928	18.219955237608506	-4.04993	0.00412232	0.00810042	-3.31468	18.244601909677694	18.261435763678584	18.25296798087304	18.256000936091116	18.226271644151513	18.171952339868707	18.160022247138546	18.18638907938885
Patient_vs_Control	O15258	RER1	0.0896606	18.726838269771086	3.6258860129670807	0.00736729	0.013424205120268214	-3.93925	18.68780913083164	18.73795677283925	18.626767572268456	18.675498426714174	18.74428762572407	18.771017447777297	18.797715284036197	18.773653897977592
Patient_vs_Control	O15260	SURF4	-0.0986952	17.436247797350443	-3.53304	0.00839499	0.014987829772186401	-4.07884	17.502329500315586	17.50419116431301	17.457108152522714	17.478752777858535	17.312491276467433	17.407697924805056	17.439788377118443	17.38762320540277
Patient_vs_Control	O15264	MAPK13	-0.141827	15.05465732609904	-13.6592	1.3058373793377919e-6	1.460218153740361e-5	5.594403504119576	15.124695970847412	15.122097789529098	15.129351691529658	15.126137433802722	14.987713665052308	14.983053899297676	14.9806	14.98361849954315
Patient_vs_Control	O15269	SPTLC1	0.12028690732310565	18.613660562374957	9.70417	1.5344521379554155e-5	8.892515485198764e-5	2.856734905686171	18.552387271600217	18.57345089817523	18.53602218380863	18.552208081269537	18.678149068997733	18.66903493542122	18.673534329091016	18.674497730636062
Patient_vs_Control	O15270	SPTLC2	0.2557817822630817	23.929533242510637	13.803752069536108	1.2090100633500306e-6	1.377252961401236e-5	5.679767452760752	23.79361604830236	23.776965812260368	23.829746206596397	23.806241338357257	24.093618242311496	24.049951034946595	24.029602084194572	24.056525173116036
Patient_vs_Control	O15294	OGT	0.14236491627950798	21.478919601822437	4.059743284447719	0.00406857	0.00800241	-3.3005	21.385155392553223	21.396492549641653	21.433487289579126	21.415813342956735	21.65006913463584	21.519837376942853	21.480890011147245	21.549611717122808
Patient_vs_Control	O15305	PMM2	0.023488454160535355	18.85841065883957	1.3234519000228055	0.22420089585184744	0.27185568606944366	-7.35871	18.837272286776596	18.86672955285547	18.83470557623149	18.847958311173652	18.91094919671033	18.853635715689556	18.845216742701815	18.87081788857765
Patient_vs_Control	O15327	INPP4B	-0.113849	12.941266201964378	-3.66353	0.00698982	0.012795101182004328	-3.88293	13.007355446946884	13.067295524447124	12.928593063387169	12.989518487880538	12.841702447044632	12.886375511692274	12.922486657684374	12.886802476632036
Patient_vs_Control	O15344:Q9UJV3	MID1:MID2	-0.00984679	21.377775947523364	-0.445096	0.6686832912408858	0.7145800369736497	-8.13927	21.37146167811879	21.420245735594996	21.355977403982425	21.383112550626674	21.421218431975824	21.350940515637006	21.34513091022848	21.374120354022708
Patient_vs_Control	O15347	HMGB3	0.2339263814050483	17.596018389210187	2.4478104388877706	0.0416778	0.0610372	-5.75326	17.414805127782973	17.45216401708703	17.547644323358014	17.50160732580263	17.997246539739752	17.626061641932395	17.516852898087613	17.711765239891093
Patient_vs_Control	O15355	PPM1G	0.19738500269822978	18.412684741572896	5.280077729554846	8.8839348966789e-4	0.00223383	-1.64111	18.29711339376019	18.248249476932443	18.38578490109356	18.324821189108928	18.58793501738145	18.4979	18.45071143960823	18.509001460188852
Patient_vs_Control	O15371	EIF3D	0.10158379947805685	18.98408117681641	6.003345525313643	3.97547268052012e-4	0.00114211	-0.755483	18.942036237088477	18.94225491354453	18.919090281914222	18.929775675762293	18.99600350217971	19.045863908003575	19.06240033738353	19.035224558654953
Patient_vs_Control	O15372	EIF3H	0.129711	19.78483678164673	9.523740649061482	1.7520386458072112e-5	9.818408435674794e-5	2.709198561569856	19.72103189581196	19.744516851768736	19.69677767230969	19.71759848019444	19.844271868799787	19.84728728259183	19.856653589207113	19.850556612490298
Patient_vs_Control	O15379	HDAC3	0.00287407	16.632342669182563	0.2749726443727799	0.7906815516589476	0.8238522674391603	-8.20732	16.63214705140467	16.634002741089077	16.627218289891726	16.630254460354124	16.628204668831273	16.635049824369716	16.63797078988581	16.63389352763411
Patient_vs_Control	O15381	NVL	0.2163136237050658	16.859369990234526	6.589394337608656	2.1730338026822852e-4	6.97472212184002e-4	-0.087627	16.734242567985028	16.70559357063286	16.804627358106778	16.760389216803304	17.04384468010956	16.950684801302636	16.909721930113044	16.965855796823003
Patient_vs_Control	O15382	BCAT2	-0.380495	18.32516050374681	-7.31421	1.085076204882248e-4	4.0260296992124874e-4	0.6822287109195653	18.5508	18.50094476619605	18.504431012883455	18.505420969836237	17.97911197455669	18.187490977602636	18.238492499278856	18.134557495086376
Patient_vs_Control	O15397	IPO8	0.29355573657841916	18.704246993803363	20.13274859972289	7.413866996490289e-8	2.3435522427866705e-6	8.751226000913096	18.55110824455674	18.54693531800024	18.571473200977422	18.56035973852221	18.87941981250864	18.84366962496755	18.830381408077628	18.850628602816464
Patient_vs_Control	O15400	STX7	-0.026087	19.078497769853204	-1.90761	0.0948958	0.12716635697023884	-6.56916	19.092969825386184	19.11580291023836	19.068330278128915	19.089061971627096	19.058375668302308	19.06362910925087	19.07350181706648	19.06631057882541
Patient_vs_Control	O15427	SLC16A3	0.2930106950272098	22.962095756316053	8.409370747042543	4.1823038946159105e-5	1.905126827104515e-4	1.7413812167719485	22.816636162455623	22.909068278488395	22.729210226217766	22.807446968048012	23.10099370146873	23.095240991372393	23.12628844613277	23.11188127634472
Patient_vs_Control	O15431	SLC31A1	0.0794006	17.336841890302278	2.8237480233759737	0.023612029718676732	0.036991	-5.16926	17.284121239279134	17.252488287294067	17.346968405690376	17.30498852116584	17.435404817551987	17.365153299962067	17.330688682190605	17.37492186928414
Patient_vs_Control	O15439	ABCC4	-0.0677819	19.927617679646698	-2.15645	0.0649995	0.0909072	-6.19926	19.945387580139432	20.022824517035893	19.91634400265996	19.9615	19.962871488465993	19.861109069707815	19.85511969718909	19.8958
Patient_vs_Control	O15446:Q9HD64	POLR1G:XAGE1A	0.4276509820489167	18.998215646168063	7.344063098009972	1.0556933124836441e-4	3.9410391450693093e-4	0.7126955792129124	18.751841592551273	18.70871349780751	18.87600414263995	18.801001387575695	19.35803539608717	19.177862393241547	19.103	19.209250419175063
Patient_vs_Control	O15455	TLR3	-0.49623	11.497692543872423	-4.58242	0.00206465	0.00447893	-2.56407	11.8085	11.878586853250113	11.581261460493582	11.714904591366071	10.968894715234452	11.317438533950432	11.457479922084453	11.254498000012688
Patient_vs_Control	O15460	P4HA2	-0.0319053	18.31190640339359	-0.518547	0.6188664698122697	0.6676954731928477	-8.10043	18.36741141031229	18.24689910574068	18.374999489105655	18.32212630915139	18.124084219017774	18.36494694800368	18.401498394698255	18.29328535111899
Patient_vs_Control	O15484	CAPN5	0.0246726	18.872645846411686	0.9685551538794466	0.36264580477906255	0.41853005634530027	-7.74968	18.861315489250657	18.925585712211003	18.79980116746352	18.85453580426246	18.878453801653706	18.87604398831771	18.898156918341144	18.887273889793285
Patient_vs_Control	O15498	YKT6	0.0968307	20.244202220564446	4.045506520615545	0.0041468	0.00813977	-3.32108	20.191539267702986	20.256789248130698	20.142788372688617	20.192030578882516	20.30939923517885	20.276901724667265	20.289432191918703	20.294737145345945
Patient_vs_Control	O15504	NUP42	-0.337122	11.799026270741527	-11.9981	3.3562796552101755e-6	2.8958542002727045e-5	4.546917283033427	11.97898086727258	11.903710560907816	12.018332214497608	11.9693	11.58225516591107	11.656779850485597	11.65455055550901	11.628275429205331
Patient_vs_Control	O15511	ARPC5	0.00411947	18.77895854796002	0.13658129236719635	0.8949186905982481	0.9147111252447381	-8.23934	18.793618648811307	18.810319459264463	18.734835516410634	18.768821623020557	18.706197357620574	18.799441565159103	18.836173477502708	18.782260735890816
Patient_vs_Control	O15514	POLR2D	0.12283881620361115	9.426055604074964	4.071617111057413	0.00400455	0.00789217	-3.28336	9.348151363258667	9.329551550760002	9.40806	9.372778196263354	9.561312655646592	9.469649517158995	9.432762624272945	9.486175251628548
Patient_vs_Control	O15523	DDX3Y	-0.982017	17.682843793571184	-13.7709	1.2303124808877725e-6	1.3949909527084652e-5	5.660416569321484	18.146335065575297	18.023752068684693	18.330228154792483	18.195093890935535	17.318020841991665	17.176616047632102	17.086246247633067	17.18645803132462
Patient_vs_Control	O15530:Q6A1A2	PDPK1:PDPK2P	-0.0843174	18.2347	-6.02532	3.8835869610606195e-4	0.00112042	-0.729663	18.27320809655354	18.301446389077064	18.25682786454003	18.275959937370363	18.207866444471364	18.183454994257858	18.185462205155243	18.193389182536933
Patient_vs_Control	O15533	TAPBP	-0.543017	17.57875570491628	-10.1167	1.1420967192161309e-5	7.133952304291008e-5	3.185283065469587	17.8829	17.899939716486557	17.78241210102494	17.835795596897167	17.161663120377565	17.345691272922277	17.412507968067516	17.30912743563332
Patient_vs_Control	O15541	RNF113A	-0.0777424	12.676967292816844	-2.56788	0.0347268	0.051771123665004685	-5.56721	12.735630103695645	12.702050526430758	12.7149	12.710736263847172	12.551238055728138	12.668375947512196	12.695073085355794	12.63769734580385
Patient_vs_Control	O15550:O14607	KDM6A:UTY	0.22520536808494995	20.429188261564295	6.6253448681300275	2.096684826464274e-4	6.768583008718608e-4	-0.0480243	20.29428188532109	20.34168959575226	20.308834972576214	20.321535856437706	20.63936705982053	20.50614872645243	20.479072455676626	20.542575540477497
Patient_vs_Control	O43143	DHX15	0.028622780233408918	18.452874547662024	1.8239824864720624	0.10766316675504313	0.142265	-6.69006	18.445353994678648	18.415595228546525	18.454966635795877	18.43833677116023	18.43796773065167	18.480471512624664	18.483894466997818	18.46641004084075
Patient_vs_Control	O43148	RNMT	-0.270994	15.655966980074679	-13.3509	1.543016344094624e-6	1.647237623476454e-5	5.409409415419612	15.801147339568672	15.816299161574172	15.762080925451125	15.786327833743211	15.476961037670822	15.530270123289476	15.55326768127063	15.521381738029325
Patient_vs_Control	O43149	ZZEF1	-0.0890677	19.09442900143041	-4.01333	0.0043297	0.0084446	-3.3677	19.144462649267055	19.186960335873124	19.09121533679499	19.133213133078566	19.02409825300373	19.050078964494205	19.073802786494515	19.051600552437097
Patient_vs_Control	O43150	ASAP2	-0.140432	15.99486764032728	-2.6933	0.028726126799320094	0.0438458	-5.37224	16.09390085532053	16.13391070693452	15.982299096996236	16.050224200927612	15.795335837166608	15.954622024872918	16.021462060306852	15.927186340092964
Patient_vs_Control	O43156	TTI1	0.2221111033756813	17.32581357139293	9.195377216279983	2.2428957457423583e-5	1.1782463838424964e-4	2.4344132546467225	17.219103854587594	17.153106580248732	17.26828413230184	17.218537511682186	17.419674942953318	17.45282746980687	17.440246853335182	17.43472722622773
Patient_vs_Control	O43157	PLXNB1	-0.3786	12.706592214052861	-12.1171	3.1246729050046703e-6	2.7423511481182818e-5	4.626344711976914	12.887328234861114	12.824724881735513	12.96696944378474	12.904547161265176	12.557348098233357	12.5164	12.480620044938515	12.514761574834877
Patient_vs_Control	O43159	RRP8	0.0996181	19.576367656732568	3.3236111125843286	0.011319552082302262	0.019407224537443323	-4.39692	19.541654423726623	19.4676	19.57025869165244	19.52671526832945	19.56147847004629	19.65696396621728	19.662089183239164	19.624175236752905
Patient_vs_Control	O43164	PJA2	0.0828112	15.382886375301618	1.590068955244479	0.15256153970553882	0.1933699640565604	-7.01597	15.376469079424906	15.298269473343506	15.357149320648135	15.334035309919592	15.271344897964836	15.480812897379984	15.522083096998887	15.4229
Patient_vs_Control	O43166	SIPA1L1	0.10333751539248937	25.38640474407172	9.366393586756717	1.9703387715576815e-5	1.067315557115296e-4	2.5785547919966785	25.332020099120964	25.332049205847593	25.339055806286137	25.3358	25.450139202220058	25.434645499264068	25.429541537949216	25.438
Patient_vs_Control	O43169	CYB5B	-0.213647	13.409406276967482	-7.0901	1.3371686566296845e-4	4.7260433352903946e-4	0.4504644692865494	13.528137888028672	13.573565977877962	13.455541344331309	13.507674555551125	13.248220516648496	13.31037858525385	13.34708874581938	13.30464260222907
Patient_vs_Control	O43172	PRPF4	0.0583869	17.59114687121137	3.1885210342958548	0.013768353678160686	0.0230377	-4.60416	17.554123760623757	17.595052883242378	17.53697568972648	17.561661269969825	17.653816078602038	17.603971492972466	17.60210694964258	17.62146684491145
Patient_vs_Control	O43175	PHGDH	-0.00262988	5.190787150653243	-0.136366	0.8950832278538081	0.9147512567933529	-8.23937	5.199892688783152	5.221528293533613	5.159806772869452	5.187180613182479	5.154165628882227	5.195856519479989	5.217330083170452	5.19054
Patient_vs_Control	O43181	NDUFS4	-0.0738948	17.330965433226847	-2.03472	0.0782468	0.10719665462187017	-6.38187	17.390474453602316	17.391422384442453	17.330936670969944	17.358817910892206	17.19374691096385	17.322306411413948	17.36508065924987	17.294938064280203
Patient_vs_Control	O43187	IRAK2	-0.0737204	19.183584245148538	-0.786666	0.4553614970842922	0.5104466766517503	-7.91343	19.26800993077066	19.01595677335093	19.37530720795597	19.222503882131647	18.943466285410775	19.2467	19.25696214955228	19.139761098915827
Patient_vs_Control	O43189	PHF1	-0.00396272	5.038641237949947	-0.0548392	0.9576840529314157	0.9661607601527867	-8.24817	5.089742989400007	4.982797400728904	5.060017524310892	5.0299324689638505	4.821845041996175	5.1155592531746725	5.174392213951684	5.034843011073391
Patient_vs_Control	O43236:Q99719:F6X4M4	SEPTIN4:SEPTIN5:hCG_2002594	0.0694579	14.924625023182994	1.5128739563974745	0.17082503590708892	0.21286082119344085	-7.11876	14.89169100093724	14.762633372298849	15.005294419902942	14.899965585945369	14.95551368779465	14.982110878210342	14.944889257939424	14.95490198243514
Patient_vs_Control	O43237	DYNC1LI2	-0.0939597	19.33821246026055	-5.91304	4.3792458596941846e-4	0.00123681	-0.862254	19.392182232524053	19.400766700860952	19.366138731870972	19.381681627222335	19.259901558728405	19.29868016990015	19.31454048677184	19.291808174205684
Patient_vs_Control	O43242	PSMD3	-0.0168563	19.524358280737943	-0.683656	0.5145396244213345	0.5683207287134449	-7.99337	19.53015038950936	19.59673219308259	19.47598832020622	19.528274854016303	19.525509035025262	19.50203413891382	19.518017605584575	19.518159709565424
Patient_vs_Control	O43252	PAPSS1	0.0913956	18.195898674701994	4.319470116101291	0.00288967	0.00596057	-2.92983	18.143978923792464	18.10773914554384	18.193369331746965	18.15571617000123	18.27040151216912	18.239508557447024	18.21639380694416	18.24008194997115
Patient_vs_Control	O43257	ZNHIT1	0.010476989267779402	14.361445880515012	0.18295602725609084	0.8596300491357238	0.8835893325998108	-8.23098	14.32232884928971	14.294830384281733	14.435626565529398	14.372043744423646	14.518086973807083	14.328347200324965	14.255914243245709	14.364389083217851
Patient_vs_Control	O43264	ZW10	0.028989378201455196	19.61828727366691	1.4533967623935977	0.1862198127904952	0.23012	-7.19608	19.60520189197528	19.65110430099193	19.55947128767145	19.599392857626064	19.625049916193284	19.62726906142801	19.64436297235401	19.63444590109524
Patient_vs_Control	O43278	SPINT1	-0.834719	16.630609043885023	-10.8151	7.090511415516874e-6	5.0660385867029565e-5	3.715535161241526	17.074903823977206	16.846897436872286	17.21381075895764	17.056261991634038	16.100880864641116	16.283409179932814	16.26238990555517	16.206318389509924
Patient_vs_Control	O43290	SART1	-0.0479081	16.420562251362274	-4.20976	0.00333489	0.00674552	-3.08527	16.447956168224177	16.440222386200382	16.446098605022854	16.443788146245392	16.38157278591959	16.402172232687914	16.406215311774112	16.396472374823766
Patient_vs_Control	O43292	GPAA1	0.0378501	18.398809977712972	2.6332259306505117	0.0314545	0.0474842	-5.46568	18.386005007229116	18.390615798480145	18.36586502187606	18.37705397505535	18.39039600494521	18.424717149125303	18.43768972315771	18.41813714183489
Patient_vs_Control	O43294	TGFB1I1	-0.00915579	16.550908037060633	-0.282218	0.7853266001126422	0.8195590730345168	-8.20506	16.536901573048425	16.522477605275085	16.598446652623768	16.56411788890158	16.62936215511688	16.525195068295385	16.485669163484154	16.5451
Patient_vs_Control	O43299	AP5Z1	-0.125117	15.844980093757403	-5.03936	0.00117917	0.00281475	-1.95178	15.921368136582249	15.930450554044825	15.877082608323768	15.901253160405226	15.72068632056568	15.798411413054964	15.827305111672024	15.78328344541049
Patient_vs_Control	O43301:Q96MM6	HSPA12A:HSPA12B	-1.41755	15.008808066919835	-10.5133	8.682528250663307e-6	5.837920928760909e-5	3.4902442616830847	15.750431483774875	15.34399077429745	16.03748693246765	15.73842964209376	14.16711452292322	14.406	14.33995348108594	14.287079780920791
Patient_vs_Control	O43310	CTIF	-0.0222504	16.989373366429987	-0.702519	0.5033508080131242	0.5578187282003085	-7.97946	17.01649019996748	17.04608946978206	16.947780295952267	16.991634310694305	16.906249429491435	16.99370525529341	17.0331	16.979913988085436
Patient_vs_Control	O43314	PPIP5K2	0.0726227	17.735800545299217	5.070987580763685	0.00113559	0.00273215	-1.9105	17.693969272805848	17.719855200346434	17.68460088567304	17.69953140887804	17.79580751201779	17.761043327624783	17.75879471767154	17.772802037376263
Patient_vs_Control	O43318	MAP3K7	0.27606483914055957	17.03261618439069	9.048549732439161	2.5109375900390218e-5	1.2848539791496103e-4	2.308828713142729	16.878797323691064	16.853393280418768	16.943129067194494	16.903015387977316	17.24160128673913	17.154783949431962	17.117071322710025	17.169137856962763
Patient_vs_Control	O43324:C9J1V9	EEF1E1:EEF1E1-BLOC1S5	0.018409956075032596	18.849611160033888	0.5845840362286123	0.5758054327497681	0.6273547105250383	-8.06083	18.82593594390721	18.78808549962715	18.89825115936971	18.849352125081413	18.92431968780121	18.846587057082665	18.80743683492612	18.856920972475635
Patient_vs_Control	O43325	LYRM1	0.0735603	16.94463500867493	4.474993735840832	0.00236569	0.00505391	-2.71232	16.91677096227545	16.90623064608812	16.903244904315134	16.90517290715925	16.94213874319244	16.99432774008027	17.007797896752976	16.981396269535797
Patient_vs_Control	O43347:Q96DH6	MSI1:MSI2	0.0858139	16.159541505826773	2.6539572694611184	0.030484006233626976	0.0462581	-5.43345	16.136634962470414	16.135756754821657	16.085430828665498	16.10871572084926	16.113615219520916	16.227798436599166	16.265176292559588	16.20320383112769
Patient_vs_Control	O43390	HNRNPR	-0.0283211	17.382247988233672	-2.63704	0.0312737	0.0472405	-5.45976	17.394264355441912	17.4011	17.393582664840388	17.396694647532527	17.377395208294924	17.364300421023536	17.362411735058412	17.36824244467818
Patient_vs_Control	O43395	PRPF3	-0.00113292	16.817798510654235	-0.0801061	0.9382268622210843	0.9501986890344463	-8.24625	16.82457873731468	16.826206382014494	16.80692887889967	16.815745880627432	16.78957226311054	16.82480604468547	16.837016563770316	16.81753333481128
Patient_vs_Control	O43396	TXNL1	0.18048223761840632	18.921775933884923	9.328153290450208	2.0278973900562746e-5	1.0904055038432193e-4	2.5465201134491995	18.823598799110872	18.86925621262879	18.802394250681804	18.830889997881407	19.04581394013623	18.99476326138989	18.9942	19.013305066604392
Patient_vs_Control	O43399	TPD52L2	0.2667087244082076	18.37805244582875	8.453108970674542	4.034710352471096e-5	1.8575948924176507e-4	1.7813298246425617	18.254660176857488	18.16526690983912	18.310676497559033	18.248188750242953	18.470009214146252	18.538159758113743	18.52879244663391	18.50866581323751
Patient_vs_Control	O43402	EMC8	0.049983074337561106	18.72554821102273	1.7055184279661955	0.12857419462709194	0.1664330383206923	-6.8576	18.71845281522605	18.71781678015885	18.672498643591176	18.69345845643972	18.671047924880597	18.773198866543304	18.80669129309462	18.75122090824753
Patient_vs_Control	O43414	ERI3	-0.160602	13.519313388764514	-7.41855	9.86182040171847e-5	3.719577095730799e-4	0.7882962336613133	13.600105488204283	13.653256104380032	13.55012073810386	13.594976064670917	13.43512844282514	13.431190589378158	13.448835669614237	13.440894012939491
Patient_vs_Control	O43426	SYNJ1	0.13940206514332587	16.761761511999936	6.397919410511916	2.6354904716604176e-4	8.192571913181937e-4	-0.301164	16.6939	16.74494883809608	16.642342951175504	16.6871	16.821709442151096	16.825656895597334	16.845160156003935	16.833323684534026
Patient_vs_Control	O43427	FIBP	0.0426254	16.15231578467382	3.9228605415415116	0.00489223	0.00939326	-3.49948	16.133501431640756	16.13227474412089	16.128128869668878	16.130107244658085	16.162567635040123	16.17697248145068	16.181290156703948	16.173683714107217
Patient_vs_Control	O43432	EIF4G3	0.0963588	20.014817190712936	7.252007355468383	1.1492709720647703e-4	4.187613092822831e-4	0.6184474229039054	19.96554583100182	19.99084422449428	19.94520145939387	19.96495970025644	20.06703773586324	20.057602741033087	20.06350565560055	20.063840178060193
Patient_vs_Control	O43447	PPIH	0.1139776778218895	18.219708995517074	7.70248	7.643597118382013e-5	3.058276501831532e-4	1.0712271946850063	18.1611	18.134031548495205	18.19010372663895	18.165622880836167	18.28466420236212	18.27898600634953	18.26745543309376	18.27568569590667
Patient_vs_Control	O43462	MBTPS2	0.17158921932116655	17.934436147625465	4.761403046549056	0.00165195	0.00373478	-2.3207	17.846844381268774	17.947015315308263	17.75971913527105	17.840987320011443	18.02500642943935	18.002058221797483	18.030188006410288	18.02367037149708
Patient_vs_Control	O43464:P83110	HTRA2:HTRA3	-0.174591	18.210509372579953	-3.80257	0.00576573	0.010809070257726743	-3.67632	18.32824839837364	18.255235574117076	18.31599300916501	18.29174169020282	17.990292216677574	18.173182938381064	18.20752897992176	18.12185217380068
Patient_vs_Control	O43488:O95154:Q8NHP1	AKR7A2:AKR7A3:AKR7L	-0.0290233	15.926604547557485	-2.55304	0.035517450205668315	0.0527882	-5.59025	15.939708702818551	15.954789995961391	15.929547999123107	15.94041815293476	15.91786327900906	15.907923793659997	15.910018411355429	15.912566045597584
Patient_vs_Control	O43491	EPB41L2	-0.30104	20.599123188056037	-7.16372	1.2477874276271334e-4	4.4748472863612377e-4	0.5272016689903829	20.72135036796297	20.75941841692176	20.760035974980497	20.757767028554845	20.573087252293288	20.406895353023405	20.365605780153174	20.44882533055836
Patient_vs_Control	O43493	TGOLN2	0.25382979390660054	19.413093539882226	7.160976578227206	1.2509952385314862e-4	4.4822214091054524e-4	0.5243535113191484	19.27867569217043	19.199325468752814	19.370904397840548	19.295809012951914	19.575885947849795	19.543151827783777	19.504063097905306	19.536932873803227
Patient_vs_Control	O43504	LAMTOR5	-0.259234	13.941135840954148	-14.3233	9.22173220392747e-7	1.143244287828156e-5	5.9796605810111405	14.080886689440222	14.074445025440752	14.06043827883973	14.067241892348497	13.766701167815818	13.825315219324471	13.842367148285078	13.811691306138616
Patient_vs_Control	O43505	B4GAT1	-0.0262251	12.019827642729002	-0.896359	0.39762957612675076	0.4539444755969016	-7.81798	12.042453219464472	12.094887928358547	11.969663380622194	12.02475619011026	11.9628	12.010379638540584	12.044785225812912	12.008926488857542
Patient_vs_Control	O43513	MED7	-0.0199213	14.942040691395704	-0.641848	0.5398882325677468	0.5941309605375307	-8.02299	14.937976603343175	14.899581357889923	15.00963263597922	14.96081481028195	14.99562173258101	14.920499005066926	14.882016101003977	14.930183285019451
Patient_vs_Control	O43516	WIPF1	0.2781372502592845	16.83237400883561	10.273475485714995	1.0236486281138264e-5	6.598920989296162e-5	3.3070921719750963	16.681947058822665	16.753228989445937	16.64615906856396	16.691886417991316	17.019623868959425	16.945805824875038	16.946846764638153	16.973494077388388
Patient_vs_Control	O43520	ATP8B1	0.0842626	17.368803238666892	1.9593674401162648	0.0877383	0.11865695654158133	-6.49337	17.322410899367238	17.445772033154434	17.22044074000688	17.31806402198925	17.425914222976623	17.385973688676003	17.416760336970462	17.415089966194262
Patient_vs_Control	O43556	SGCE	0.6288365193930012	22.42972815943865	42.17969938003897	2.8576978086988644e-10	9.936623523390051e-8	14.561540155021053	22.11029365970779	22.095105745704323	22.137256363515633	22.118583830040855	22.766920031032157	22.740235292043124	22.72601333385613	22.74341701960919
Patient_vs_Control	O43567	RNF13	-0.328733	12.24799265748238	-12.6691	2.2610004232984775e-6	2.1631103783980697e-5	4.985564051131078	12.428471156420036	12.419422496396225	12.394866562431408	12.406677354258573	12.012331557602767	12.10537176130023	12.13285822852028	12.083942142929512
Patient_vs_Control	O43572	AKAP10	-0.0181663	15.640120620762618	-1.564	0.15851924684934868	0.19977693139350086	-7.05097	15.649447137654033	15.633459536845466	15.663465603598032	15.650442762275585	15.630468335875602	15.633883101778236	15.62931168812213	15.630486799951862
Patient_vs_Control	O43583	DENR	0.20110157823295083	16.210954355323203	16.650189222783887	3.040262250345617e-7	5.797714418588764e-6	7.204771222053781	16.10985706901577	16.128793718893007	16.093924268907873	16.109039208010277	16.313326569227694	16.307809130184967	16.31273762472014	16.312147253625906
Patient_vs_Control	O43592	XPOT	0.20891893706305886	15.564598990278094	5.86761	4.599368087835671e-4	0.00128529	-0.916363	15.48215761090678	15.483834060031326	15.423365539747037	15.451200876301122	15.571178821322944	15.696546074946214	15.738526262013098	15.669982676956232
Patient_vs_Control	O43598	DNPH1	-0.388915	13.495565860048838	-36.7586	8.071858936990054e-10	1.8428764344582924e-7	13.529210887300927	13.691868064950796	13.691246838146157	13.687640690410277	13.689338283117628	13.29293265012936	13.303532018227465	13.30680934788436	13.30115898752466
Patient_vs_Control	O43615	TIMM44	-0.0226828	17.3213	-2.12238	0.0684664	0.0951726	-6.25065	17.331597249496212	17.341016239262288	17.325792749715273	17.332331702513834	17.31453048274046	17.30713545634611	17.30805171423299	17.310288991302414
Patient_vs_Control	O43617	TRAPPC3	0.022461837443504606	16.621191979562948	0.36622752341391346	0.7242036453314183	0.7653980341887416	-8.17468	16.626028781387433	16.759127709359586	16.46227194324739	16.592415809370376	16.556770401440023	16.63154008066323	16.703662494686842	16.637718616348714
Patient_vs_Control	O43633	CHMP2A	0.18624363188241944	15.338250251937021	5.425322774378296	7.517599460139206e-4	0.00194245	-1.45757	15.222910423191204	15.277600791467105	15.230566742865676	15.249435786459252	15.5283	15.394681356428078	15.37005747660229	15.43241523424166
Patient_vs_Control	O43639	NCK2	-0.00125938	18.425966832557144	-0.0787569	0.9392648364730268	0.9509861114706103	-8.24637	18.419100482965284	18.41394716876315	18.443315743959865	18.430022690050027	18.45880698381711	18.41670672491563	18.40097295690879	18.42486190907728
Patient_vs_Control	O43657	TSPAN6	-0.609171	10.009189212420424	-10.3164	9.937033640232816e-6	6.461284028582371e-5	3.3401206352741415	10.2763	10.395887521483129	10.264146300560585	10.318749688938802	9.867205807128238	9.638397615511243	9.605490315103449	9.707321517168952
Patient_vs_Control	O43660	PLRG1	0.10104797593448822	19.65613172192861	5.8117178214231675	4.887186889345406e-4	0.00135278	-0.983312	19.608792032377966	19.566271163795335	19.639478536060743	19.60788920361141	19.69387012693324	19.717421867847573	19.71004001298559	19.70529083181701
Patient_vs_Control	O43665	RGS10	-0.0353402	13.642271212281509	-1.55888	0.15971465940413632	0.20117930705002646	-7.05782	13.668585308384568	13.7004	13.616995674038009	13.65383202938884	13.58517833838539	13.630452264981056	13.656719756205051	13.626054079413864
Patient_vs_Control	O43670	ZNF207	-0.143054	13.704847181410853	-4.72211	0.00173415	0.00387358	-2.37374	13.77001425005289	13.703500321699622	13.847506885119971	13.78447474397706	13.663707606918084	13.63586623385228	13.602967908098188	13.630739501568726
Patient_vs_Control	O43676	NDUFB3	-0.143049	16.36796768000794	-5.25466	9.15007353438866e-4	0.0022905	-1.67353	16.456640362403256	16.445062296878376	16.422658151155595	16.43360711697485	16.220624378320096	16.31989754509703	16.348539881253465	16.296711707980837
Patient_vs_Control	O43677	NDUFC1	-0.0438329	13.747628909364797	-1.20307	0.26516944037690177	0.3163318499644072	-7.50075	13.785822260861446	13.834070177420015	13.699280510049537	13.75900840768404	13.65184877836762	13.738567762472933	13.784390361900416	13.72804301616237
Patient_vs_Control	O43678	NDUFA2	-0.12788	16.179859838951362	-3.66757	0.00695049	0.012735872486296908	-3.87689	16.26574083953682	16.26208701446227	16.21203360564234	16.235337297822845	16.018552949214204	16.144157074335812	16.184315535137102	16.11665439545951
Patient_vs_Control	O43681	GET3	-0.0412664	17.855785548025224	-1.95668	0.0880962	0.11910357948209338	-6.49732	17.86738357545401	17.918347418128977	17.844174333781176	17.87576963122731	17.87366274163382	17.81567042217959	17.814693144628652	17.836583117168267
Patient_vs_Control	O43684	BUB3	0.0445378	18.29356447427336	2.856215606152908	0.022492670344410784	0.0354781	-5.11876	18.26323322564583	18.281528165858692	18.26743269570861	18.27298822297346	18.3511	18.30276551352511	18.29334225912773	18.316157565265055
Patient_vs_Control	O43688	PLPP2	-0.473156	12.63206293341192	-5.00927	0.00122235	0.00290533	-1.99119	12.819296549377272	13.069175627025311	12.718617549083037	12.867474100679768	12.606716043128325	12.293605226552696	12.279316628544386	12.40230174290456
Patient_vs_Control	O43707	ACTN4	0.011281199327271452	18.36493700445845	0.8507917442666563	0.4209420922030187	0.4769893167700873	-7.85888	18.353433970230952	18.360764907541864	18.36196040748681	18.36102633391964	18.396389431302374	18.36202383761884	18.3533	18.370604063349735
Patient_vs_Control	O43708	GSTZ1	0.3803398748205815	15.96466117693242	21.617240851351212	4.359159234297204e-8	1.6407515839607309e-6	9.32866	15.783673648816832	15.785139420425386	15.758452491358732	15.770699397487569	16.113986895753122	16.166172790717265	16.183921356611048	16.155243414289405
Patient_vs_Control	O43709	BUD23	0.12025595100677577	16.211957097836752	4.253275575941538	0.00314996	0.00642666	-3.02342	16.16695179445274	16.185649805250552	16.110491649645116	16.144223239985052	16.20429633636536	16.288177968734924	16.322531256053445	16.273334732206816
Patient_vs_Control	O43719	HTATSF1	0.0304685	17.92721158564877	2.1272051336808424	0.0679646	0.0945748	-6.24339	17.90528254944181	17.92365258046631	17.905856938598877	17.913117190249295	17.97160206586546	17.93108991987627	17.92426500234302	17.94282643834913
Patient_vs_Control	O43731	KDELR3	0.588632	21.4511	9.510149966183373	1.7697819844211976e-5	9.89505976282051e-5	2.6979878595542583	21.17870959541933	21.29246192764171	21.01740899910428	21.138493090930403	21.644272069025924	21.75499345506795	21.83208734010579	21.75024913085739
Patient_vs_Control	O43739	CYTH3	0.2716066328894229	14.800873893190085	6.656709364497312	2.0325073784362955e-4	6.602589953400111e-4	-0.0135985	14.639304006882943	14.640607658681102	14.705112588959896	14.675258052457549	15.051115802115175	14.903991385256028	14.855891571563074	14.935710079604911
Patient_vs_Control	O43741	PRKAB2	-0.103779	16.835297633235356	-2.62663	0.0317698	0.0478611	-5.47593	16.86068761160406	16.90617934666708	16.887907046463457	16.893974058851136	16.899687209803318	16.742781587722707	16.707203422167794	16.783960782603312
Patient_vs_Control	O43747	AP1G1	-0.015727	17.640229807660045	-0.910181	0.3907466638955509	0.4469348589857946	-7.80523	17.649061249667515	17.686759502099438	17.611996782645516	17.644555644366157	17.6269	17.627599919795884	17.64128192643846	17.633725415162193
Patient_vs_Control	O43752	STX6	0.16721645158019527	18.369923170836138	13.442847976881186	1.4675373297742755e-6	1.5892049321685933e-05	5.46501	18.28282671865409	18.274012997045553	18.299974550481284	18.28844551400323	18.469311871826065	18.450534106887524	18.441194180022286	18.45308542776906
Patient_vs_Control	O43759	SYNGR1	-0.20132	13.346153908429416	-4.22735	0.00325876	0.00661352	-3.06024	13.473794490099015	13.359715918186527	13.508178336535671	13.445567259117126	13.12927464275307	13.297618526061022	13.312525365601536	13.24255672908136
Patient_vs_Control	O43760	SYNGR2	-0.351341	18.577472874947798	-16.2355	3.6637397599296697e-7	6.415498255876846e-6	6.999282891927756	18.752493396550967	18.699643610246163	18.802616259153456	18.757820394356763	18.406383441038123	18.40937556956078	18.391525541162583	18.39992478751356
Patient_vs_Control	O43765	SGTA	0.3545337905334467	14.709573412871247	5.3966327368348725	7.767958267190615e-4	0.00199654	-1.49359	14.49322351981003	14.4621	14.623374745780392	14.55052538483278	15.061482278251628	14.842518178457896	14.759147279526893	14.884213496315466
Patient_vs_Control	O43768	ENSA	0.0675299	12.331930968198453	0.5834231794434602	0.576547	0.6277885177910008	-8.06156	12.22600652002822	12.195900460697636	12.441239548432367	12.32951757539672	12.687263629526983	12.279519598484969	12.134195892027002	12.361804520993726
Patient_vs_Control	O43772	SLC25A20	-0.244402	21.329538174339028	-17.7521	1.8908363920007936e-7	4.235241513616502e-6	7.7269199565788576	21.45814715480881	21.449623404711353	21.449295248147067	21.44989096542391	21.1791	21.216767979081013	21.22615052699873	21.207290340024656
Patient_vs_Control	O43776	NARS1	-0.140348	16.3251	-6.85423	1.6752466451673746e-4	5.671140937882322e-4	0.20056232493396386	16.404062286452454	16.425922504775045	16.361290315600193	16.389996517622517	16.215418663179292	16.2625	16.285860853555555	16.256079838720627
Patient_vs_Control	O43795:Q8N1T3	MYO1B:MYO1H	0.11486545221847422	21.6163	3.858630932045329	0.00533936	0.010121497710937719	-3.59368	21.539440920543026	21.574757572187387	21.55748805440488	21.56362224618377	21.758694097828247	21.64364790589382	21.618260380270875	21.674168218200005
Patient_vs_Control	O43805	SSNA1	0.0608074	13.288576759042614	1.0033542100183077	0.3466347252016174	0.40202140460962676	-7.71528	13.268962879503608	13.089276283640382	13.405573378149976	13.268879785065606	13.276797989125903	13.36111535538634	13.324900542973984	13.313107858495114
Patient_vs_Control	O43808	SLC25A17	-0.0124099	16.235726552006223	-0.570185	0.5850483891523048	0.6356395124359161	-8.06983	16.25466228264755	16.251423711888407	16.224525139872547	16.237114926236423	16.17306279310068	16.246083029499612	16.269032020391318	16.22990851241325
Patient_vs_Control	O43809	NUDT21	-0.0931034	15.938770622618708	-1.10824	0.3016737447601209	0.3554658196285949	-7.60611	15.930301035475392	15.941387120536884	16.063218632699076	16.006382483190613	16.13632223619294	15.821104032212322	15.72100476378326	15.89044467685918
Patient_vs_Control	O43813	LANCL1	-0.218491	16.01895055150799	-8.87978	2.864381458548492e-5	1.4170537540867948e-4	2.1623322647521785	16.143646465188965	16.127149625237813	16.11858721932039	16.123400774320668	15.84158755665459	15.931800102270468	15.955698365410786	15.909734303660256
Patient_vs_Control	O43815	STRN	0.0805623	19.345948076083438	2.8846338443434245	0.021558304253290545	0.034145593677603066	-5.07458	19.320358222233416	19.340401465033924	19.263787022730163	19.298120984414112	19.3203	19.401564753157515	19.435529109507975	19.38750907181919
Patient_vs_Control	O43818	RRP9	-0.00562117	19.98732103123542	-0.3763	0.7170053474141425	0.7587787024374012	-8.17053	19.996	19.9674	20.0069	19.990172641511673	19.95934835540884	19.99644264058775	19.99851016773087	19.983740615556435
Patient_vs_Control	O43819	SCO2	-0.10359	18.841659378136615	-4.28135	0.00303657	0.0062272	-2.98365	18.883163315143484	18.853333791938788	18.93726020977693	18.90005975471705	18.836542599815285	18.78162967535981	18.752871004898168	18.78841467344341
Patient_vs_Control	O43822	CFAP410	-0.293111	18.139113019161005	-4.00217	0.00439515	0.00855311	-3.3839	18.241784009666848	18.20881818833519	18.386110986693236	18.305959943236548	18.188590790591523	17.942476555363452	17.849486103806566	17.989677575594683
Patient_vs_Control	O43823	AKAP8	0.17248875970769006	18.511729403376535	9.27432	2.112148317647592e-5	1.1225325873107371e-4	2.5012331795124343	18.434066865930895	18.4475	18.399453123074352	18.420934098159407	18.559414935207965	18.606660240385864	18.627038602988655	18.59878135433903
Patient_vs_Control	O43824	GTPBP6	0.0306226	16.32126879771984	0.691327	0.5099708513979133	0.5642987053959029	-7.98775	16.335881692344902	16.284395878617772	16.305249489823062	16.298302858223618	16.205276826776235	16.38247561902558	16.4226	16.33595215508035
Patient_vs_Control	O43826	SLC37A4	-0.100397	12.418908260736913	-7.34164	1.0580455523409913e-4	3.9478020557965856e-4	0.7102254407571813	12.463163681399196	12.481096204355673	12.462184629492032	12.469982987397346	12.394540656104745	12.35837054213578	12.352822946699938	12.3691
Patient_vs_Control	O43837	IDH3B	-0.125304	18.67904984151619	-3.50323	0.00875671	0.015538647164832402	-4.12385	18.763950102925374	18.764190685938654	18.705874931983548	18.73279100512855	18.51754100152985	18.644403968453553	18.68636607931431	18.61728095685568
Patient_vs_Control	O43847	NRDC	0.10817034080246657	18.118658862883414	1.6417362741040706	0.14135560057953372	0.18095697675872288	-6.94574	18.02187078232154	18.02719287112565	18.12803797561447	18.08119314086708	18.362301713985342	18.118071793514524	18.03935062693673	18.17125199870198
Patient_vs_Control	O43852	CALU	0.5362334391800232	18.798553572372924	5.815173657831744	4.8688243063368155e-4	0.00134872	-0.979161	18.467850812884645	18.5166	18.585889126228288	18.55136878163801	19.34317585886811	18.980032936003205	18.87755251043892	19.065919862541513
Patient_vs_Control	O43854	EDIL3	-0.0728121	13.658292333250126	-1.05388	0.32436419865423805	0.37956849015596894	-7.6637	13.650433721649424	13.788709264243444	13.638820954802643	13.700829534146548	13.81412346989331	13.544132381803475	13.50429742179011	13.624991917672055
Patient_vs_Control	O43861	ATP9B	-0.00995524	15.866265772553525	-0.818041	0.43828641848129113	0.4941889171943156	-7.88719	15.872081720372876	15.852391371926853	15.887946343621406	15.872554125664406	15.858194268037012	15.865471712545638	15.86085553318552	15.860631105074487
Patient_vs_Control	O43865	AHCYL1	-0.0448416	17.224455608033015	-3.26514	0.012317456826510535	0.0208731	-4.48645	17.245702263552353	17.273025484639057	17.22371603394348	17.245061932924546	17.20637625780588	17.19621580292372	17.20260097617694	17.202946112298136
Patient_vs_Control	O43896	KIF1C	0.0134251	20.61227498022744	0.7695722006679181	0.4648528285137401	0.5197298045945996	-7.92736	20.59627047082093	20.62365383677122	20.595338638287327	20.60698683516523	20.65939432341756	20.60292646793488	20.594047410493715	20.619581858928655
Patient_vs_Control	O43909	EXTL3	-0.0940261	14.464691205986801	-1.80465	0.11084067043616208	0.14589410545391418	-6.71772	14.48619517506422	14.425180552052836	14.60844378181256	14.526997416667497	14.53296906336637	14.395213139377244	14.327993144689884	14.414537374863793
Patient_vs_Control	O43913	ORC5	0.0165597	14.323682771827386	0.450331	0.6650694059683739	0.7113427277546605	-8.13668	14.312217501620376	14.218151590453662	14.406704637742113	14.32453792568334	14.34912883262274	14.342885146908868	14.307295438975853	14.328541100612128
Patient_vs_Control	O43920	NDUFS5	-0.1678	16.97212766104576	-7.20721	1.1981269296841675e-4	4.32890788745858e-4	0.5722564500677993	17.07043029525583	17.05628807482286	17.045938468362966	17.051454601128434	16.82469078689659	16.90862755037309	16.9313	16.888298001618324
Patient_vs_Control	O43924	PDE6D	-0.138725	13.496671258233958	-4.43073	0.00250339	0.00529307	-2.77388	13.546121030597678	13.59782594330936	13.550518392021528	13.5697	13.514123890732987	13.39399815814038	13.372775329343488	13.428338014159335
Patient_vs_Control	O43929	ORC4	-0.0353198	14.83570291856873	-0.472897	0.6496007639574387	0.6964300071086797	-8.12522	14.894154761135656	14.958400814549952	14.729203223655825	14.831692418583147	14.634747006962014	14.859259041271848	14.956268277073272	14.821897805318129
Patient_vs_Control	O43933	PEX1	0.1626131281004497	18.020923560625754	5.775015666418079	5.087005337958247e-4	0.00139923	-1.0275	17.922283920590495	17.926027720822194	17.963925883925285	17.94623046096413	18.17912069985847	18.07978723581895	18.048332561500867	18.101680001525622
Patient_vs_Control	O60216	RAD21	0.0831186	17.039007597048432	2.959956468369935	0.019272690343708442	0.0308888	-4.95758	17.01405545755984	17.01845597511134	16.96683750242571	16.990444175848133	17.006640573351486	17.100801488382192	17.13345169867016	17.081373905038593
Patient_vs_Control	O60220	TIMM8A	0.10415132502419411	9.654820469765337	1.612953476308328	0.14750093368489064	0.18796715842357267	-6.985	9.630772657373264	9.44792	9.725459537144925	9.60683	9.588226814465369	9.77126	9.766505015795204	9.701590161191598
Patient_vs_Control	O60229	KALRN	0.1458205870935423	23.011051933395574	1.1524943074345142	0.2841601666206865	0.33684050919874237	-7.5577	23.004452449657943	23.13501987769156	22.712363620917664	22.900730611128047	22.78516178517936	23.146812909681582	23.312730059839275	23.091144153069163
Patient_vs_Control	O60231	DHX16	0.10079263732784582	18.513877401610486	4.2290690118290994	0.00325143	0.00660231	-3.0578	18.476594021638817	18.485658495886785	18.43418833626224	18.457483477998416	18.505722807195212	18.579363155939003	18.606902120653775	18.56510679730965
Patient_vs_Control	O60232	ZNRD2	0.0894161	15.249730764943966	2.459269727843233	0.0409572	0.060078180204596925	-5.73554	15.217547605493024	15.113755035766182	15.280095463690335	15.208692796645693	15.242116093327256	15.326708771257302	15.317636397333636	15.291293956038302
Patient_vs_Control	O60238	BNIP3L	0.3021078035314133	9.287341237392594	3.7474931935773244	0.00622057	0.011554971711983632	-3.75789	9.150476599942335	9.347048794500823	8.933436372715725	9.114187575348662	9.36906	9.425064923894713	9.51362	9.44584
Patient_vs_Control	O60244	MED14	0.22894530893985277	18.80164429450412	5.7615781862399436	5.162410609348838e-4	0.00141501	-1.04372	18.669382157955752	18.777760104314396	18.616322220275116	18.685222077591497	18.991683285407586	18.87648278166366	18.877086184744332	18.91921554408061
Patient_vs_Control	O60245	PCDH7	0.0378269	17.068026999774297	0.9698051084498243	0.3620611472299626	0.41797644689880287	-7.74846	17.052216176192815	16.941790704988556	17.14534410359132	17.057103159893725	17.07669306745668	17.108386990640447	17.079488977490463	17.083192817940372
Patient_vs_Control	O60256	PRPSAP2	0.0382841	17.17168511688776	2.065231136118502	0.0746962	0.10289218045695725	-6.33638	17.15125534946441	17.196652200839715	17.113001412804078	17.149263356065916	17.195094188252657	17.18199491507174	17.193852149559685	17.192367363043875
Patient_vs_Control	O60264	SMARCA5	-0.00129598	19.92948023578595	-0.056639	0.9562968712549491	0.9651526957710628	-8.24806	19.920109469029025	19.894497597918996	19.969633405261124	19.936272424908744	19.97416587467008	19.920270773475316	19.89335141159848	19.927540929425835
Patient_vs_Control	O60268	KIAA0513	0.20052970804090187	15.120826779944872	5.372673049089437	7.984094610577016e-4	0.00204346	-1.52376	14.999381146490322	15.085708105007916	14.975347871341569	15.021810580857885	15.312431858659806	15.18068444354445	15.167966032386742	15.223284201270294
Patient_vs_Control	O60287	URB1	-0.0374715	14.760368126569062	-0.434324	0.6761480331952961	0.721923	-8.14449	14.838635712488188	14.746711122016452	14.768070872385698	14.762997836441787	14.480078529417668	14.831270023580329	14.91442979724337	14.740751118979006
Patient_vs_Control	O60291:Q96PX1	MGRN1:RNF157	0.010307352156761596	16.783033010877517	0.5009481908653287	0.6306244638645089	0.6788261074790718	-8.11024	16.7663	16.802443487774745	16.76328380422724	16.779483524513463	16.838446782665688	16.76786056221327	16.75744127639129	16.78899812655335
Patient_vs_Control	O60292	SIPA1L3	-0.0196809	20.56373046088981	-0.25547	0.8051535475401427	0.8357116139499818	-8.21312	20.61779579319185	20.668708957693628	20.45613585042258	20.551643110375103	20.35576875383021	20.60155046178037	20.700828274879864	20.557412484944876
Patient_vs_Control	O60293	ZFC3H1	0.40281012518750714	27.34665937398923	13.511319298331765	1.414041595465686e-6	1.5480257466402457e-5	5.5061749402939615	27.12692112387617	27.12865977721471	27.173001327845277	27.15243501664576	27.62946272391647	27.52467932427009	27.49071096203597	27.547404736109403
Patient_vs_Control	O60296	TRAK2	-0.461575	24.674441400898946	-5.39479	7.784345988870762e-4	0.00200005	-1.49591	24.964168847878852	24.85978794462111	24.906558642261356	24.890400644735152	24.18512923057718	24.53452329437893	24.612649841267945	24.442312761471044
Patient_vs_Control	O60306	AQR	0.18374612712045035	16.877394629588167	4.777565717889563	0.00161939	0.00367115	-2.29895	16.808723000928744	16.818458869750994	16.739467956059293	16.77543643737274	16.865872283920154	16.99696707687287	17.043710562950356	16.970520848850175
Patient_vs_Control	O60313	OPA1	-0.206253	23.166695123968864	-9.05167	2.504871437352967e-5	1.2826487542462388e-4	2.3115194784132047	23.27044503655581	23.211972076192435	23.32240953130455	23.27445965529544	23.062671875048583	23.073640095871436	23.056418589609915	23.061544131872736
Patient_vs_Control	O60318	MCM3AP	0.0269356	18.058407477542353	2.5094929732628746	0.0379454	0.0560999	-5.65778	18.043460512186975	18.038594622044354	18.0518	18.045937430908943	18.078603006399646	18.070783530920274	18.066467999257934	18.07164663883421
Patient_vs_Control	O60331	PIP5K1C	0.072878	16.53649601595883	1.8759484225872523	0.0995486	0.13271936883864058	-6.61517	16.5162	16.57436166169963	16.42091661666344	16.488742803230608	16.499317790467636	16.58405712135379	16.632757385778522	16.575607706005204
Patient_vs_Control	O60333	KIF1B	-0.046045	19.63482377127805	-2.66703	0.029887997394181808	0.045419803740336225	-5.41311	19.650372144448117	19.636943911934704	19.682113713396745	19.66195530473359	19.64543884320794	19.604512541153444	19.58621678574508	19.611036925604772
Patient_vs_Control	O60336	MAPKBP1	0.15168808908721232	11.285719657656061	4.002015784336103	0.00439603	0.00855311	-3.38412	11.21201537043705	11.311495047958216	11.115286071469212	11.200705962585335	11.348869888848329	11.34846342531874	11.383787652352908	11.365133842278698
Patient_vs_Control	O60341	KDM1A	0.4180176930700803	23.673206593051106	20.780060668202783	5.8548051541092815e-8	1.977590800571751e-6	9.008281647691213	23.452185425071217	23.467196440072197	23.469665830372236	23.46774329054861	23.93510505385672	23.86469012871905	23.84679728188644	23.882269293882377
Patient_vs_Control	O60343	TBC1D4	0.35062122301560805	21.494243599729714	4.93625	0.00133455	0.00312636	-2.08736	21.270210895680844	21.35964515078008	21.31494834238612	21.330927564040607	21.883160395994008	21.593937709578327	21.530345646669613	21.67077309270812
Patient_vs_Control	O60353	FZD6	-0.215838	18.660232088756175	-6.76777	1.822225477843004e-4	6.039357648257228e-4	0.10737428022726725	18.75737241744802	18.847296781020173	18.702992702985853	18.764942280228425	18.59732155942337	18.52444660011772	18.53244372665454	18.555040642171303
Patient_vs_Control	O60361	NME2P1	0.7517034717758264	32.56820077768008	9.83945	1.3911611190763601e-5	8.258746741053318e-5	2.965806735600049	32.14198249599261	32.28164247888334	32.14496835183593	32.20080284045679	33.1634	32.85838729410605	32.807500012833344	32.94696679894948
Patient_vs_Control	O60427	FADS1	-0.00224345	14.21161682880047	-0.0615291	0.9525288396778502	0.9622807951477119	-8.24773	14.194355256165656	14.287530088992078	14.156771894504748	14.212296969385658	14.289186790002056	14.172526699873128	14.167229329710928	14.213
Patient_vs_Control	O60437	PPL	-0.607239	21.226691859007996	-8.82236	2.9970982078724654e-5	1.4687792693882375e-4	2.111953463860612	21.574871212536184	21.441495339155512	21.581226525394843	21.523652897925988	20.729367089403492	21.00042000763535	21.042351899748823	20.92014990026378
Patient_vs_Control	O60443	GSDME	0.40592131317885105	18.271174284954913	9.26871	2.1211475439817497e-5	1.1248089590526316e-4	2.4965031153658863	18.042386367313014	18.0235	18.126829638918625	18.08011051552431	18.5895	18.44457436030569	18.390017419848817	18.47245889492966
Patient_vs_Control	O60447	EVI5	-0.000523	22.938211027809235	-0.0260694	0.9798750773044698	0.9854080449631234	-8.24949	22.94386553542705	22.89194937387281	22.97741844535616	22.940656598498677	22.915651543870837	22.952991835960596	22.946812616374903	22.93634227311284
Patient_vs_Control	O60462	NRP2	0.0735301	21.180312449339862	1.677586656179724	0.13403293046353779	0.1726726284835485	-6.89639	21.11453680424719	21.135046415875827	21.171180489148604	21.153425986273433	21.345314036835845	21.17725260009077	21.129087404382236	21.21665585786499
Patient_vs_Control	O60476	MAN1A2	0.043199909018451166	18.182060906183782	3.7248434810309936	0.00641868	0.011895737103876744	-3.79154	18.16417359381454	18.15476301438396	18.163143291114423	18.159763907385305	18.187467141445268	18.20983505899073	18.21386421951857	18.20347702281747
Patient_vs_Control	O60488	ACSL4	0.12178480014857485	18.05105744611024	4.006261427666806	0.004371	0.00851349	-3.37795	17.9876	18.071802733967623	17.917119954846044	17.984159162978838	18.12074436472489	18.09531439366109	18.11694101012588	18.11479961622624
Patient_vs_Control	O60493	SNX3	0.078545	17.623170922849663	5.182478708218998	9.955050899322427e-4	0.00245166	-1.76609	17.577136108860067	17.603249357311185	17.57079016173805	17.58441812988287	17.691651746557522	17.649772674787776	17.64525652857628	17.663092675083547
Patient_vs_Control	O60499	STX10	0.27582248474582904	11.979796900106116	10.523661521977616	8.621574632142794e-6	5.823750042914587e-5	3.4980806886886793	11.827190859051786	11.882790692903315	11.814450394519849	11.843110684457857	12.181215653037338	12.090356030969998	12.080181989988503	12.119078895920286
Patient_vs_Control	O60502	OGA	0.17128815630062988	19.379478278945705	13.337851962634575	1.5540587097456064e-6	1.654189023114055e-5	5.4015	19.297225903962364	19.30913552124864	19.277491932551047	19.2915	19.449671553066175	19.46750634868623	19.477638506337076	19.46567302029459
Patient_vs_Control	O60503	ADCY9	0.16916162757611986	14.028993687351502	2.1445760280931236	0.0661878	0.0923921	-6.2172	13.899450778556124	14.093106607980824	13.838900095730317	13.946194011986504	14.307136266997947	14.026147021407658	14.002421337592354	14.118593378560291
Patient_vs_Control	O60504	SORBS3	-0.0613069	14.258239803546804	-4.20261	0.00336642	0.00679988	-3.09547	14.289814240831952	14.25918978215185	14.315484086721987	14.291084806202887	14.22447542082425	14.233610501180912	14.225710172239449	14.226549418221143
Patient_vs_Control	O60506	SYNCRIP	0.0799903	17.84913162922149	6.147978003879205	3.412020165666684e-4	0.00101032	-0.586672	17.814387432185427	17.798326948437186	17.815451015462532	17.808380525105342	17.866311414582817	17.898296027999802	17.90312929328237	17.88877037671645
Patient_vs_Control	O60507	TPST1	0.032916866403070344	17.564429419660186	0.6861747563612518	0.5130365160854471	0.5672527099083382	-7.99153	17.517325388098527	17.519797871936902	17.59475023407438	17.560010451724793	17.716966427150773	17.541866393696193	17.484948690067238	17.579769900532675
Patient_vs_Control	O60508	CDC40	0.12623381793977728	17.195082012576115	6.639826555045598	2.0667767364810556e-4	6.692507197243755e-4	-0.0321147	17.12257964722569	17.11264656142213	17.15608841647203	17.136545789305057	17.300216531743136	17.247945919584303	17.227151311657458	17.257481923199116
Patient_vs_Control	O60512	B4GALT3	0.038662602879199426	17.388276737226576	1.3360742686877645	0.2202367659015627	0.2676267040461326	-7.34332	17.383488387118323	17.312471164073614	17.410752505837575	17.369069686118397	17.345269091745045	17.437217038858194	17.44225497379869	17.405691050262767
Patient_vs_Control	O60513	B4GALT4	0.33168950820255816	20.596555339710882	8.575104149642103	3.652945323903768e-5	1.7234674868153076e-4	1.891864163163266	20.429970824842258	20.325723308956174	20.527428917473312	20.439719291166668	20.769	20.778022204816473	20.74383377232972	20.75871790605495
Patient_vs_Control	O60518	RANBP6	-0.125717	16.774618529520342	-2.89451	0.021243048208117506	0.0337284	-5.05922	16.86103272481956	16.895742343671003	16.767969410337997	16.825162671453185	16.605989760519304	16.735940656480096	16.79120816067287	16.71390250820872
Patient_vs_Control	O60524	NEMF	0.21124053836832957	21.28584998452758	14.668025421232402	7.743737124505639e-7	1.0225093758253197e-5	6.172926190011738	21.173922574554563	21.196539831816544	21.16959674725034	21.180859707752205	21.418768191804247	21.379928455656643	21.37516946138971	21.392014905996376
Patient_vs_Control	O60547	GMDS	-0.511403	17.464280502973747	-22.6328	3.092552482939141e-8	1.3362022621551247e-6	9.700284354515254	17.730973660556888	17.678683345899966	17.75031111125624	17.71996029623445	17.161418797329343	17.23073751781653	17.234980735644427	17.207178559052124
Patient_vs_Control	O60551	NMT2	-0.324473	16.12682067522513	-16.4438	3.334218947117093e-7	6.101871366378199e-6	7.103128249466234	16.28969232653942	16.336357461122777	16.245276466105693	16.284903382587572	15.960268059381574	15.957973798840328	15.973849738758569	15.966244168465106
Patient_vs_Control	O60563	CCNT1	0.0619454	17.520161184458193	2.3965481572190868	0.0450626	0.0654493	-5.83239	17.47269165541523	17.49961822996828	17.490913941766767	17.493530163987728	17.623566397574116	17.526063614845548	17.50347646809461	17.551429004013254
Patient_vs_Control	O60565:Q9H772	GREM1:GREM2	0.54313	12.807991578454645	4.418418034747691	0.00254323	0.00535487	-2.79105	12.455854703473475	12.69204728638007	12.448921498099152	12.548881995920686	13.42996847193382	12.940488514624306	12.86310360803342	13.084666549172228
Patient_vs_Control	O60568	PLOD3	0.0926212	21.75892254863524	6.256487958154285	3.047405063919232e-4	9.183719264027335e-4	-0.461765	21.718629445699115	21.7272	21.69514284454827	21.709492390053903	21.778223451599445	21.81145993172225	21.825479838189004	21.80576943782593
Patient_vs_Control	O60573	EIF4E2	0.19331790248353187	16.99623134438047	4.1226625575331965	0.00374149	0.00743544	-3.20986	16.930714585249504	16.908830955733396	16.86978714511331	16.888956886458605	16.95522721740279	17.135620215949206	17.18736619953263	17.09334754960432
Patient_vs_Control	O60583	CCNT2	-0.263697	12.706815106656624	-16.9937	2.6135924095383957e-7	5.185992330013414e-6	7.371189696082588	12.846717173965605	12.830091667623751	12.841010151157525	12.836834672525203	12.539716724305652	12.58775871409778	12.59769098326786	12.574700766309611
Patient_vs_Control	O60603	TLR2	-0.146208	10.840938507874249	-2.67821	0.029387911359885315	0.0447717	-5.39573	10.917160032744368	10.76132117653257	11.051866717376232	10.925821746593009	10.75897552609146	10.796511678232442	10.753355050430168	10.762496134993736
Patient_vs_Control	O60610	DIAPH1	0.0663232	20.530877951444264	2.6467851967939633	0.0308162	0.046665288158663346	-5.4446	20.508050204861117	20.54123471003336	20.450767121845715	20.490813276914142	20.51706327427073	20.571795719329835	20.601690660198074	20.565608644101133
Patient_vs_Control	O60613	SELENOF	0.10171067572846582	12.84186243691198	2.876136995046753	0.021833353608892544	0.034537943685470834	-5.08778	12.814310777082198	12.791475565040251	12.774638622527718	12.78360343154083	12.789911543016698	12.925718347256517	12.962407636620489	12.892833572211137
Patient_vs_Control	O60637	TSPAN3	-0.0591152	9.831926392849322	-0.490124	0.6379133992409867	0.6857122981389202	-8.11612	9.784085852292892	10.03123751010883	9.758857112425565	9.871755492214144	10.138329475111362	9.665560450905591	9.597597914765618	9.807987334970576
Patient_vs_Control	O60645	EXOC3	0.10833887343435578	22.643679054875218	8.300148076409421	4.5779906002074534e-5	2.0495700406324233e-4	1.6408748694368196	22.592886736300667	22.606088009622862	22.572006993368863	22.58705673333977	22.68242110925918	22.700008982825985	22.710520029733456	22.69844384455097
Patient_vs_Control	O60664	PLIN3	-0.0515884	22.460155372108876	-3.07734	0.016203409628585297	0.0265167	-4.77571	22.478213651707808	22.51070566895423	22.468553818935952	22.486325182280854	22.467690832160017	22.41945025710844	22.41510787362991	22.435195692093803
Patient_vs_Control	O60669	SLC16A7	-0.0530041	13.92016792489736	-0.781563	0.4581813182882236	0.5130562775863531	-7.91762	13.900902646207706	13.936167660322017	13.98759821964786	13.962011297449644	14.095879394103436	13.830376015356183	13.755305480343312	13.893102685748724
Patient_vs_Control	O60671	RAD1	0.2721139425108987	16.51509543196304	6.893928195663846	1.6122270762675063e-4	5.519213366575401e-4	0.24305993183285146	16.352941424293903	16.37465140628345	16.40090859793486	16.38765241431816	16.76640551823137	16.61480948526716	16.57250723392558	16.650887375449848
Patient_vs_Control	O60678	PRMT3	0.058933008575444035	14.847031727766037	3.231796957899888	0.0129279	0.0217861	-4.53762	14.812375985957011	14.857508864926288	14.784509420605923	14.815866622424036	14.898108041549346	14.862790055942984	14.867218997487484	14.877875833235231
Patient_vs_Control	O60683	PEX10	0.591968	22.502105621780203	5.973208451123955	4.1054387503842803e-4	0.0011701	-0.790996	22.137628051886093	22.239215504329405	22.222641258803986	22.22500093612053	23.099150114845212	22.695621619942575	22.598630076274617	22.79895741203921
Patient_vs_Control	O60684	KPNA6	-0.040823	18.035865660425706	-2.53541	0.0364806	0.0541096	-5.6176	18.048707650076043	18.04337161087937	18.073281381851288	18.059747940662053	18.049256238284887	18.006760180006445	17.990830631839398	18.014969649806183
Patient_vs_Control	O60687	SRPX2	-1.05631	23.44661727057382	-20.405	6.707225602484494e-8	2.1704005882871865e-6	8.86036	23.978056123933086	23.830186169103964	24.105029521914105	23.98582011969115	22.908611767751395	22.946081816591168	22.905743792727783	22.91340885287792
Patient_vs_Control	O60701	UGDH	-0.161927	16.124329323409917	-4.32672	0.00286262	0.00591062	-2.91961	16.18456190074344	16.159622583767426	16.261324800437613	16.21566113574354	16.13627109977363	16.02119533625525	15.974320496145795	16.04167723441264
Patient_vs_Control	O60704	TPST2	0.39573005455804555	15.266192963033268	8.974499837519485	2.6596146825529864e-5	1.339345269793235e-4	2.24484	15.087147555095395	15.152081688075164	14.978702216455892	15.05538028339053	15.378362577917754	15.477468564208792	15.533327616550809	15.467073202571807
Patient_vs_Control	O60711	LPXN	0.29912663059498357	15.220841493348532	2.8730131857145267	0.0219354	0.0346843	-5.09264	14.999590535307986	15.137677851414168	15.059460898727291	15.088383426754715	15.68448783367506	15.25811405216838	15.16659143919154	15.372425909549111
Patient_vs_Control	O60716	CTNND1	0.014874089611069508	21.422606200822628	0.907362	0.3921431546541929	0.4481811418508243	-7.80784	21.406474542488297	21.411966047107764	21.424051456698862	21.418184577773445	21.468497315225637	21.41821161613596	21.403570130117117	21.429893921033937
Patient_vs_Control	O60725	ICMT	0.2266413139606449	14.346747825141312	17.76765461116324	1.878579812499171e-7	4.220735320267368e-6	7.734058943472066	14.228736327274907	14.225845185307904	14.24358386695777	14.235543293103376	14.48100241476978	14.454614784926406	14.444873944097468	14.459782784692882
Patient_vs_Control	O60749	SNX2	0.00595295	17.828610138373644	0.3582651674809229	0.7299147835617402	0.770988	-8.17789	17.816539242459317	17.83267189877619	17.825404054539106	17.827919451465778	17.871476115681233	17.817561206991616	17.80551466779453	17.831794469281373
Patient_vs_Control	O60762	DPM1	-0.122813	16.39326686953309	-3.33811	0.011085572611837947	0.0190643	-4.37476	16.47305543502548	16.510907071919195	16.39056741704858	16.44416446013424	16.248977390286495	16.34901961398477	16.395534463100944	16.333909104765006
Patient_vs_Control	O60763	USO1	0.0569529	20.67422350842004	3.819487131403232	0.00563334	0.010607181777379368	-3.65135	20.651738626704443	20.66116908702842	20.62751597794732	20.6426	20.675777498034908	20.70875472977281	20.72300160614354	20.70326591763961
Patient_vs_Control	O60783	MRPS14	-0.182161	9.92056	-9.92317	1.310038070139825e-5	7.905700816661986e-5	3.032652881202285	10.012627819671842	10.054033645767817	9.97213	10.007791239624009	9.823789488214857	9.82415	9.839024112790325	9.83097
Patient_vs_Control	O60784	TOM1	0.0445673	17.114527054122465	2.7018450803219975	0.028358455865228983	0.0433752	-5.35895	17.090141663108938	17.128986241593097	17.060009039232444	17.08983657185739	17.144904192468424	17.127992965975615	17.136256424972515	17.138089333771298
Patient_vs_Control	O60825	PFKFB2	-0.0936302	14.720161716616907	-2.83138	0.0233439	0.036641635183533985	-5.15739	14.77091435235782	14.852261894434813	14.686126746438768	14.758604260190303	14.653246176428484	14.665391845926308	14.6984	14.676352027667166
Patient_vs_Control	O60826	CCDC22	0.149855	19.943588590774652	10.037742647920629	1.2074952795720634e-5	7.434342775240478e-5	3.123334840560302	19.864953515858044	19.84385173139989	19.893933110176267	19.871906548968553	20.035665253057775	20.017193358063903	20.00357445626425	20.017630752408543
Patient_vs_Control	O60828	PQBP1	-0.0884773	16.044399951504513	-2.81858	0.0237955	0.037233881197357065	-5.1773	16.104960458212748	16.028451088900123	16.132631855005844	16.08851104630975	15.930094695448949	16.03288474765793	16.0395	15.998121766601548
Patient_vs_Control	O60831	PRAF2	-0.144784	18.860718782984513	-2.41398	0.0438817	0.0640208	-5.80551	18.974132733701655	18.918819382481328	18.918149237374756	18.921341141986197	18.607838535476755	18.84881917876916	18.908648971674523	18.78800108241173
Patient_vs_Control	O60832	DKC1	-0.191467	16.64275241255116	-8.2494	4.775970901067011e-5	2.1187205054429718e-4	1.5938079512043828	16.750503131537858	16.764817782938504	16.706135950153755	16.73248765057862	16.493168811027452	16.5599	16.587020327956765	16.54799267523684
Patient_vs_Control	O60841	EIF5B	0.0204354	19.900459421739725	1.6451455383933382	0.14064359061147125	0.18017184186753737	-6.94107	19.88678886940861	19.90634745948713	19.877843835354447	19.889986801169936	19.92539156761896	19.903218833175703	19.902871243605748	19.91122676409726
Patient_vs_Control	O60869	EDF1	0.0711728	19.336701935519745	2.5642157103160432	0.0349203	0.052027	-5.5729	19.28324809699414	19.31718611971485	19.298609054221437	19.305418877678072	19.45058578139666	19.3444	19.321415248255704	19.372775292077502
Patient_vs_Control	O60870	KIN	0.11732837575069865	17.98017528254914	3.7312548012721645	0.00636192	0.011799532537868918	-3.78201	17.905263632755737	17.878423133855975	17.97211060814043	17.93024700394302	18.111886477424058	18.022621808624905	17.983589330909776	18.037260264739224
Patient_vs_Control	O60879	DIAPH2	-0.023106	18.479318526052758	-0.586162	0.5747979057376436	0.6264439265218318	-8.05983	18.516756617966685	18.49902655403718	18.46569337052787	18.48200965378109	18.353326655515637	18.50320922170904	18.546364469055423	18.46816166582915
Patient_vs_Control	O60884	DNAJA2	-0.0546282	18.940758870140684	-4.88622	0.00141792	0.00328895	-2.15368	18.96491001541875	18.96993110049336	18.96853348935885	18.968917212499715	18.92733680620761	18.908660544087077	18.904285381556925	18.913496411503186
Patient_vs_Control	O60885	BRD4	0.0323014	16.31582445217744	1.5514553000810054	0.16146228446149166	0.20292557678791948	-7.06772	16.288518119826026	16.281859365452704	16.323629361423652	16.304688123134916	16.381752689520862	16.318970896280366	16.295873737362314	16.331303324418702
Patient_vs_Control	O60888	CUTA	0.20631692924751732	-6.4226	4.1866116811043925	0.00343807	0.00691972	-3.11829	-6.52399	-6.66277	-6.4014	-6.51486	-6.32286	-6.29517	-6.33549	-6.32423
Patient_vs_Control	O60890	OPHN1	0.0784597	21.8623	4.674859817298941	0.00183896	0.00406841	-2.43781	21.82601232643426	21.85710183961284	21.78982301818893	21.819270411690653	21.88736253297343	21.90030621807938	21.915660318113694	21.902717456938813
Patient_vs_Control	O60907	TBL1X	0.31140450246762263	14.990016656365947	17.427201038919716	2.16853422453382e-7	4.670984338509131e-6	7.576420071346176	14.830586057500987	14.874912440798102	14.799659688677163	14.832099433552283	15.160863849206905	15.133980257683444	15.140905852887936	15.147125670620756
Patient_vs_Control	O60925	PFDN1	0.077541	18.3747	2.386839811779862	0.045734349010392646	0.0663162	-5.84735	18.34492348919861	18.251933008462107	18.40665005459218	18.34005183458261	18.376272206714468	18.43958477513045	18.427338304333976	18.410527047724823
Patient_vs_Control	O60927	PPP1R11	0.14122732744278466	15.040549159202147	2.473245145186617	0.0400954	0.058980006012511625	-5.71392	14.932821044865896	14.940905208127033	15.021924814849209	14.984090914080875	15.275802603956755	15.06309622615366	14.995765215745749	15.109987245837992
Patient_vs_Control	O60934	NBN	-0.00708431	18.561554461481954	-0.481449	0.6437853749441758	0.6911086162661527	-8.12074	18.572399619547426	18.557326854473384	18.56722190035657	18.56343810171537	18.526048086819927	18.56961131402653	18.578618639695012	18.55777117522142
Patient_vs_Control	O60936	NOL3	-0.169198	3.7150940956394103	-3.28035	0.012049125255138897	0.020480147256290555	-4.46313	3.7656232938432534	3.783373068748986	3.8379517699111623	3.81182	3.7812975846147103	3.584731595682051	3.5261735838180854	3.6297780043457326
Patient_vs_Control	O60942	RNGTT	0.12392401067229031	17.30676388334221	4.921469643532507	0.0013586	0.00317152	-2.10692	17.260358747914566	17.251434953373654	17.22808266904229	17.239331141693757	17.299892907099064	17.38975245369527	17.41623352065343	17.36902467326564
Patient_vs_Control	O75023:Q709C8	LILRB5:VPS13C	-0.208738	20.27168692747795	-3.85983	0.00533065	0.010107602200152617	-3.59193	20.41115435498509	20.40330237455203	20.32708071351472	20.36268695566629	20.011628451624365	20.212806063754527	20.276414288189912	20.168422217536683
Patient_vs_Control	O75027	ABCB7	-0.177862	20.006800547474448	-5.97183	4.111508744607857e-4	0.00117137	-0.792627	20.113252345548315	20.120457904880457	20.061088577737777	20.088128208089284	19.839794883450494	19.93880981584253	19.974062120051272	19.91881052419545
Patient_vs_Control	O75044:P0DMP2:P0DJJ0	SRGAP2:SRGAP2B:SRGAP2C	-0.0260235	18.92695652822043	-1.10138	0.3044654006138184	0.3585816702067906	-7.6135	18.941341343773132	18.99917573663952	18.884770317299413	18.934585766560076	18.905991546696068	18.906491357283542	18.927270750485455	18.91602540702622
Patient_vs_Control	O75063	FAM20B	0.12950614300561725	18.79742810305333	4.941511744098495	0.0013261	0.00311255	-2.0804	18.71672193214564	18.720308455188185	18.75491954235528	18.738750196513003	18.93294557981875	18.84150272417066	18.81259661113132	18.861679783103824
Patient_vs_Control	O75064	DENND4B	-0.152005	11.199284424606248	-1.54369	0.163307	0.20496220608846774	-7.07804	11.207661258153928	11.343262731223671	11.259246446050325	11.290976486698815	11.419396637836195	11.016506488271007	10.931849566756584	11.125375781859454
Patient_vs_Control	O75083	WDR1	0.20360712743860176	20.881460503963147	4.371154565747853	0.00270271	0.00562898	-2.85717	20.74813697227819	20.788847373407467	20.792793564642672	20.788849850647058	21.12200246519989	20.937068255368867	20.890533845725923	20.983451704435108
Patient_vs_Control	O75094	SLIT3	-0.459109	18.2362	-20.4443	6.611499189188727e-8	2.158296346884749e-6	8.876008271397083	18.45506532989969	18.507682508032737	18.43465992898966	18.465637797307497	18.05248886756699	17.98481406779463	17.981230000602707	18.0081
Patient_vs_Control	O75096	LRP4	0.690754	25.724457432943492	5.871805265020617	4.578538877424273e-4	0.00127996	-0.911356	25.29769428585204	25.411452373235377	25.405080436139848	25.402094740729225	26.427787216137613	25.94918213602377	25.8317	26.070621724293662
Patient_vs_Control	O75110	ATP9A	-0.0512487	18.81156239873037	-1.36579	0.21114363528883268	0.2575197636343839	-7.30673	18.81209839684773	18.849397905274852	18.84315599619967	18.844094612551164	18.896210102694535	18.748390998745847	18.712892187693036	18.786258989836135
Patient_vs_Control	O75112:Q9NR12	LDB3:PDLIM7	-0.180625	15.714181131996066	-8.98277	2.642525254615981e-5	1.3325773072656003e-4	2.25201	15.793690052692902	15.78879381791984	15.826270482822526	15.809219939493248	15.672025372021428	15.611028361028414	15.589148573168757	15.623272456821413
Patient_vs_Control	O75113	N4BP1	0.16383493504689994	15.852253633861004	4.73025	0.00171674	0.0038453	-2.36273	15.789508758731474	15.708230226066544	15.81413764028876	15.769468040263432	15.85159148113912	15.971245275086126	15.981771141330174	15.932076507982403
Patient_vs_Control	O75116	ROCK2	0.1843916548026847	21.151690492319748	14.912431833037873	6.857647013392964e-7	9.487016850190423e-6	6.3072961027090155	21.05784531563491	21.04186543284381	21.07677854710049	21.061489364094413	21.251726274535017	21.244344929151957	21.236212564416693	21.243261510780705
Patient_vs_Control	O75122	CLASP2	0.043505	20.34606673109709	2.0904832097615604	0.0718775	0.099441	-6.29857	20.311724826086532	20.32897264968011	20.32865602373066	20.32790342655597	20.423201159550572	20.34921129769213	20.330935680385153	20.36792878509558
Patient_vs_Control	O75131	CPNE3	0.22267350777002548	22.398171395156357	7.479945700584205	9.32712651760423e-5	3.5509216804768557e-4	0.8501787931066715	22.2778	22.361691534181094	22.22442689976173	22.283439238488334	22.547045626383778	22.484770813716793	22.49412343343971	22.512092722625212
Patient_vs_Control	O75143	ATG13	0.072618	17.555290344888093	4.965736562241406	0.00128794	0.00303469	-2.04843	17.52543241759082	17.529136148875292	17.505262896625414	17.516093901273052	17.562818692334247	17.599142785986164	17.612453204966585	17.591982711453177
Patient_vs_Control	O75146	HIP1R	5.372739753823907e-4	19.631874688465665	0.014494679405892752	0.9888094676632314	0.9914778200350525	-8.24975	19.607204474965183	19.627801880328953	19.65178236877519	19.63963548184257	19.73989918825594	19.598114215455453	19.558653944161065	19.63190595394097
Patient_vs_Control	O75147	OBSL1	0.0713412	13.83270419165876	1.4389035251452154	0.1901541408153269	0.23454485409349948	-7.21466	13.766467909830444	13.755829775370152	13.855699701962592	13.810136885340295	14.004518226931856	13.831536096244571	13.770644363382116	13.866800574208046
Patient_vs_Control	O75150	RNF40	0.015202750886892602	17.79066033008781	0.6349344174125955	0.5441519827921346	0.5978630421829922	-8.02773	17.76871844574205	17.772308343103713	17.802719590496146	17.788489439235544	17.861861295250808	17.77961539227241	17.75374631575172	17.797823818850084
Patient_vs_Control	O75151	PHF2	0.34604276119906885	15.219355471823018	6.7902883383187325	1.7826099347933685e-4	5.938502077698827e-4	0.13172729716656484	15.013218352462426	15.02229542176694	15.091	15.05880861885667	15.539218627862322	15.349192964301428	15.289702569689103	15.39139324783736
Patient_vs_Control	O75153	CLUH	0.1411397565138941	22.315943136990565	5.190495948967425	9.86190636995004e-4	0.00243447	-1.75578	22.237430526033258	22.186227887441255	22.305007852372768	22.2528	22.423442737362286	22.38463220357844	22.35357058834309	22.384406531706237
Patient_vs_Control	O75155:C9JH00	CAND2:NA	0.21849338787546735	11.284227348277305	8.930908275980363	2.7517395757535888e-5	1.3734246330931446e-4	2.2069586201712585	11.172217800271223	11.114671958392703	11.2321	11.18089443232776	11.407592876661646	11.39912978130363	11.375824628034152	11.391348882860727
Patient_vs_Control	O75157	TSC22D2	-0.0175502	18.55115491307606	-1.35816	0.2134466677587252	0.2599378865867597	-7.31617	18.565420648202263	18.558424391762586	18.557554383610196	18.5583	18.51820923446008	18.550411730380276	18.5585	18.542350445541985
Patient_vs_Control	O75164	KDM4A	0.0626416	15.015205743580713	1.4427799306604079	0.18909467962664292	0.23336311145653754	-7.2097	14.978853752079797	15.104114230657473	14.877145723657954	14.975426048632723	15.064867186837027	15.020293275068264	15.050227485712949	15.050718245999516
Patient_vs_Control	O75165	DNAJC13	0.050543499970260086	21.413192122981286	2.5737138600298395	0.034420918473449705	0.0513781	-5.55815	21.384378229346353	21.435014633853044	21.34718503211619	21.385103596669037	21.45257936721881	21.425957897557375	21.435219152033127	21.440099075056356
Patient_vs_Control	O75167	PHACTR2	-0.432906	12.54697907141118	-4.72115	0.00173622	0.00387702	-2.37505	12.81693202165073	12.872041302581462	12.627308399014716	12.737447502771875	12.09106219717703	12.389210921391244	12.507270287232508	12.334559939469871
Patient_vs_Control	O75170	PPP6R2	0.19476611545987055	17.701832688767528	15.761271970186685	4.56045523400023e-7	7.318778927180149e-6	6.757845616776898	17.60308151511067	17.586332453855235	17.621988318497845	17.606396236686624	17.80583082838864	17.800150997129688	17.792306122455628	17.79857503801589
Patient_vs_Control	O75175	CNOT3	0.034285780963422496	17.750374764491493	1.5753805659898437	0.155893	0.19684096667516424	-7.03573	17.74463347181366	17.75530244533457	17.70520755577295	17.72778402311794	17.716518793863663	17.780195147002697	17.80501698923665	17.768339689789816
Patient_vs_Control	O75179	ANKRD17	0.00246666	17.333865229337658	0.18517745500731592	0.8579474429232905	0.8822323937791674	-8.23052	17.335920263377872	17.310703761099266	17.35047810662141	17.333425472955373	17.321296260883816	17.343247942548288	17.34150586621628	17.33434416099895
Patient_vs_Control	O75182	SIN3B	-0.138051	12.609277812709756	-2.83706	0.0231462	0.0363547	-5.14855	12.64867001731192	12.634838084890506	12.738404693620769	12.691301283855026	12.672356284083484	12.505095547743108	12.444954004325623	12.538602585847604
Patient_vs_Control	O75191	XYLB	0.3284075441354588	13.727148213283279	3.293573012496602	0.011821006755367333	0.020139288690548825	-4.44288	13.557729209814385	13.845287069758433	13.30776733888372	13.540994146405652	13.905310999188805	13.83911378219454	13.919759380150664	13.901223779870032
Patient_vs_Control	O75208	COQ9	-0.220284	14.023217182086775	-7.10923	1.313268848162015e-4	4.656865716027425e-4	0.47046742778459105	14.152176760668707	14.091819251066893	14.158556534582834	14.13088440141039	13.83140284758118	13.946379462776331	13.962818493343914	13.911699705263947
Patient_vs_Control	O75223:M0QZK8	GGCT:NA	-0.0238434	16.165609562056833	-2.06696	0.0744993	0.102642	-6.33378	16.175631520706936	16.165518150363187	16.189839646941973	16.17913566995469	16.16245231335259	16.15289927952728	16.146141110887644	16.15325880472036
Patient_vs_Control	O75251	NDUFS7	-0.107378	17.62036523085475	-3.91415	0.00495039	0.00949258	-3.51222	17.657881714772397	17.653679865753872	17.703787330852343	17.680868046275076	17.638665036485357	17.546957985138018	17.515188586962406	17.56589328059852
Patient_vs_Control	O75306	NDUFS2	-0.0663882	23.49633076544845	-1.51296	0.17080276174235684	0.21286082119344085	-7.11865	23.556075727743018	23.568771540613216	23.475398347150993	23.51785392293927	23.34476505881384	23.49458792332452	23.54856842063136	23.46462518237139
Patient_vs_Control	O75312	ZPR1	0.32247531352655656	18.903959712010415	16.1969	3.7286553049172795e-7	6.415725808430976e-6	6.979924912594232	18.73783610818802	18.70136056732355	18.78396838807075	18.747723157406224	19.088074058416503	19.064830966680017	19.04415733426359	19.063727115734658
Patient_vs_Control	O75319	DUSP11	-0.44252	12.545308863912453	-10.5164	8.664090750090609e-6	5.836272200845169e-5	3.4926088420206867	12.76525550028876	12.652047740368474	12.872416656625042	12.776555758316237	12.33351098917632	12.340370727791484	12.302283452035557	12.320030086697749
Patient_vs_Control	O75323	NIPSNAP2	-0.458226	13.575355967626635	-14.8209	7.175240620274911e-7	9.702519816527297e-6	6.257244995694554	13.822836357726048	13.759504963307943	13.833111617330095	13.80242237088552	13.266665410514369	13.379452481207409	13.394108754907109	13.344745785134592
Patient_vs_Control	O75326	SEMA7A	1.1324795495738869	37.531979282502995	16.513560256114516	3.2313780502491436e-7	5.973550005802341e-6	7.137637216421107	36.969899702184776	36.77257714244352	37.139911727505606	36.98056945873029	38.08605678859093	38.13479795395072	38.08055360992965	38.09146787668848
Patient_vs_Control	O75340	PDCD6	-0.128383	17.03715140416354	-1.91542	0.0937804	0.125903	-6.55776	17.06053048188157	17.036993312328242	17.18822885263841	17.11961899461181	17.15504273662229	16.925253484472663	16.841012502752978	16.97053086800037
Patient_vs_Control	O75347	TBCA	0.17135092770878302	18.222210403681675	4.80145	0.00157255	0.00358612	-2.26687	18.12487960366222	18.0587	18.215859791115317	18.146725948550102	18.361791231947343	18.303707728725215	18.26093678693284	18.30510772253887
Patient_vs_Control	O75348	ATP6V1G1	-0.1775	15.056703667111448	-6.7718	1.8150655418893027e-4	6.027107133640604e-4	0.1117361472432652	15.13691991391654	15.20883970605967	15.093202596259411	15.14285279796066	15.0036	14.945775747001392	14.95233492683704	14.970138399255369
Patient_vs_Control	O75351	VPS4B	-0.0590373	17.393485291498852	-2.58423	0.0338768	0.0506694	-5.54183	17.40921235065167	17.416751205991638	17.438167239240485	17.42788504501764	17.425000955567093	17.345385100643334	17.321791741081203	17.36368869379774
Patient_vs_Control	O75356	ENTPD5	0.0864789	9.005542980979424	1.6750656566617648	0.1345361038122547	0.17319863011937303	-6.89988	8.99061	9.03174	8.879306082411041	8.947554261266538	8.921701404238288	9.077930016874545	9.144161699818474	9.051336508780013
Patient_vs_Control	O75367	MACROH2A1	-0.202155	14.496008633502125	-17.6751	1.952799298947073e-7	4.347359902716928e-6	7.691518377722385	14.599444392701148	14.58484877480607	14.606687367437004	14.59736350285806	14.38492059056514	14.40022179814771	14.400070151556497	14.394512489945376
Patient_vs_Control	O75368	SH3BGRL	0.00214808	16.43887463447644	0.0839731	0.9352525750675145	0.9480242166464086	-8.24589	16.42533011507843	16.401920993815295	16.479210865242948	16.44474040924466	16.49610470113751	16.42794699699607	16.39710481948208	16.43863817481455
Patient_vs_Control	O75369	FLNB	0.2410278827677601	22.358216222148332	7.734157211890051	7.432862167915095e-5	2.9969497266767544e-4	1.1022809607549995	22.255698830431427	22.188307137227365	22.27065972236277	22.23614343303624	22.4009	22.512116693333503	22.524797184745875	22.47707597483507
Patient_vs_Control	O75376	NCOR1	-0.0366438	19.885644598667646	-1.36401	0.21167820145945015	0.25808552797744283	-7.30893	19.89521791390155	19.848193207841103	19.96106202335461	19.911392828735615	19.907698943959407	19.86376266222771	19.83249825877292	19.86533095054824
Patient_vs_Control	O75379	VAMP4	0.14855378209801273	17.88103885431427	9.081814078123523	2.447201347747625e-5	1.258412974736138e-4	2.337430816087153	17.8018	17.77949610291609	17.835138108708623	17.810606802981425	17.978046009052438	17.952612763305176	17.93626506356677	17.954339145528724
Patient_vs_Control	O75380	NDUFS6	-0.220571	15.006787289407248	-7.53491	8.875838931231137e-5	3.4303261386027213e-4	0.905242	15.136119926264945	15.109997478779796	15.110529243586026	15.111644963650257	14.812712985871851	14.924658743181736	14.952300011673168	14.8963
Patient_vs_Control	O75381	PEX14	-0.1002	18.080932551876725	-3.44175	0.0095563	0.016741867984622658	-4.21697	18.141087247901492	18.19085355293096	18.06933415884291	18.12285508431342	17.984565292222484	18.03560367999009	18.070189638343155	18.032971760469277
Patient_vs_Control	O75382	TRIM3	-0.0609623	21.664348635216406	-3.9868	0.00448699	0.00870921	-3.40623	21.687524970366606	21.711142265696093	21.68487700818286	21.69577485353353	21.66556599512765	21.620909334956018	21.614586677024025	21.634407976844475
Patient_vs_Control	O75390	CS	-0.198343	19.1877	-6.10709	3.561769596175354e-4	0.00104576	-0.634127	19.308247464252524	19.28218961485862	19.27659273075443	19.28053512592571	18.99449748214624	19.11960557117092	19.151614635699275	19.088474321426673
Patient_vs_Control	O75391	SPAG7	0.0466005	19.156908763398967	2.6523045251422492	0.0305602	0.0463449	-5.43602	19.123926432431983	19.14795358213427	19.12708475689229	19.13546932029856	19.22245660916816	19.16418918421741	19.153519819581668	19.180670402467396
Patient_vs_Control	O75394	MRPL33	-0.13211	12.446010634374694	-2.55573	0.0353729	0.0526163	-5.58608	12.547031056094765	12.509974766692324	12.490066824278603	12.5012	12.22579288801912	12.429913648604328	12.484083837613106	12.380031238492204
Patient_vs_Control	O75396	SEC22B	-0.111213	16.14466371761433	-4.23831	0.00321227	0.0065337	-3.04466	16.186688376733972	16.24786269270983	16.16594571253806	16.200584847024075	16.1474	16.06222233078274	16.055896966573165	16.090666865950674
Patient_vs_Control	O75400	PRPF40A	0.052728382637376114	18.80989677634552	1.694238334593172	0.13075318901720162	0.16892423676638468	-6.8733	18.766315384923427	18.74819270423812	18.82769488743296	18.791927363512833	18.913337219523186	18.81743655347672	18.77932095793596	18.83494913972097
Patient_vs_Control	O75410	TACC1	-0.101306	19.099682454219575	-4.59193	0.00204009	0.00443356	-2.55103	19.156701190663583	19.195692987585815	19.104414458385655	19.14453245823518	19.01949685802924	19.050861958007054	19.07511348522331	19.05064623762678
Patient_vs_Control	O75414	NME6	-0.366557	14.055638680457447	-4.46643	0.00239168	0.00510196	-2.72421	14.294151058868165	14.158782144472143	14.27457622907068	14.228159956289984	13.631294389974316	13.963478879015597	14.02487937218458	13.869787413784106
Patient_vs_Control	O75420	GIGYF1	0.0364656	16.72115584853062	1.9145168630522003	0.093909	0.12605211472566183	-6.55908	16.693320052063598	16.73138167202195	16.683411277790466	16.703579245539693	16.780835280538007	16.721239812946745	16.71513449997568	16.740344947368847
Patient_vs_Control	O75427	LRCH4	0.018456761688195655	20.124151367864773	0.5925559962809294	0.5707242301636932	0.6225617461391229	-8.05575	20.13422967637553	20.131800048262203	20.086251205096396	20.10741101834857	20.047678348085768	20.158101688972817	20.193685456488492	20.13405350128841
Patient_vs_Control	O75431	MTX2	-0.243366	16.428392675650386	-6.39843	2.634118065893601e-4	8.192571913181937e-4	-0.300588	16.57495060560489	16.558598728559712	16.525251130347083	16.54150225081821	16.196714714870186	16.340661248286864	16.38234830204409	16.307114424672065
Patient_vs_Control	O75436	VPS26A	-0.114604	17.2341	-4.37561	0.00268724	0.00560474	-2.85093	17.281670118284783	17.352175371361618	17.24241021157673	17.289422621820545	17.21787315827879	17.15332968692824	17.157155244319753	17.17890265192794
Patient_vs_Control	O75438	NDUFB1	-0.195948	15.99968256278636	-4.84253	0.00149543	0.00344143	-2.2119	16.120305560409466	16.146628867567067	16.037285999245846	16.08640578507712	15.800236195542746	15.926077523206098	15.976999289574207	15.903521281668322
Patient_vs_Control	O75439	PMPCB	-0.110093	20.490707998733942	-3.83142	0.00554191	0.010453891374254586	-3.63375	20.564242333034414	20.52527224903662	20.5519	20.54162373472207	20.354768624794385	20.46515407515842	20.487700906363145	20.435022660357276
Patient_vs_Control	O75448	MED24	-0.0410413	16.540375204094975	-1.42862	0.19299075761753723	0.23758703025683625	-7.22778	16.54250320942298	16.583707499095194	16.552570906994827	16.564801719641935	16.60025262396531	16.490127370349597	16.46846278496534	16.520575518324623
Patient_vs_Control	O75475	PSIP1	0.18767964972540696	17.14044466656882	12.007588398149432	3.337037602469627e-6	2.887091063179291e-5	4.5533045208648275	17.043805619937423	17.079573991094108	17.018305882742666	17.044733873050273	17.24557550839947	17.22507602468379	17.231058552262574	17.235427880380257
Patient_vs_Control	O75477	ERLIN1	0.1775368675343323	19.230415750621773	4.407239727701443	0.00258	0.00541823	-2.80666	19.118526872994497	19.211572208615323	19.093380643013795	19.143109542794814	19.418927070646767	19.275265160654108	19.261008567695026	19.32153593855987
Patient_vs_Control	O75489	NDUFS3	-0.0537883	20.22835796606423	-1.99573	0.0830257	0.11285442693056097	-6.43973	20.25423220524662	20.185443007484377	20.31992412780899	20.261409141354935	20.208198993847653	20.211101981027195	20.18754110632719	20.199013165416872
Patient_vs_Control	O75494:Q8WXF0	SRSF10:SRSF12	-0.0536085	18.374247169335973	-1.22844	0.25604671966575626	0.306551	-7.47156	18.397982460674807	18.283474311387817	18.51090038499618	18.411848450612727	18.36474654532068	18.36175850793194	18.319957058327667	18.343309635435965
Patient_vs_Control	O75503:A0A1B0GWJ7	CLN5:NA	-0.277756	18.378749804451022	-3.06427	0.016518159615010256	0.026959231450336362	-4.79592	18.579553188671408	18.520814371376677	18.47235258411504	18.497791859226552	17.966620980371356	18.327256175304363	18.425361922710895	18.240247353831897
Patient_vs_Control	O75521	ECI2	0.2088715519542923	23.590357997483967	5.477099548906983	7.088002650787251e-4	0.00185641	-1.39284	23.460586271930868	23.51259947947337	23.478803861925098	23.491699272697954	23.8057	23.654598032655645	23.62326188796889	23.69562056742901
Patient_vs_Control	O75525	KHDRBS3	0.2899039970621047	12.06278957813823	6.0958816999161325	3.6040716294028234e-4	0.00105606	-0.647169	11.948442567956535	11.942857979266726	11.873975316618017	11.90607445458743	12.071943130716122	12.247206051343207	12.303068248306118	12.208748876311676
Patient_vs_Control	O75528	TADA3	0.0456599	11.680193421235971	1.2530332734434355	0.24745814395967008	0.29758553478154004	-7.44288	11.649970617554285	11.567223300992246	11.745026170307046	11.667233768017525	11.738520527675128	11.706845016434563	11.666894868958677	11.699833099948307
Patient_vs_Control	O75529	TAF5L	-0.486419	12.70669960107022	-10.5853	8.26885524133718e-6	5.642914109555522e-5	3.54454	12.923407699656217	13.030803130431662	12.893902849788782	12.95152311732356	12.577795135282168	12.41303034729584	12.396922806395407	12.466211722388127
Patient_vs_Control	O75530	EED	0.1199121897476303	15.605895092605111	6.27605	2.986389884346227e-4	9.044636638530133e-4	-0.439404	15.538866730192584	15.585225634117664	15.514773234944006	15.544890391670936	15.695787985060193	15.649574755298914	15.650844274490424	15.667197735066166
Patient_vs_Control	O75531	BANF1	0.0185276	8.845103912737748	0.23490601154903257	0.8205014195632472	0.8488667279187917	-8.21878	8.8897604986775125	8.778794846067223	8.851237187767191	8.823567871315992	8.618355349748585	8.939955899818914	9.00656	8.852598656874664
Patient_vs_Control	O75533	SF3B1	-0.00794207	18.729891368598448	-0.743947	0.4793280642528298	0.534033	-7.94776	18.73223241198888	18.74053709102344	18.728860470151695	18.733819644780223	18.73289630956791	18.722546935480462	18.722090805628813	18.726147280166153
Patient_vs_Control	O75534	CSDE1	0.23251425518929736	20.530904980595558	20.63270143067638	6.174176815074284e-8	2.0308035632284876e-6	8.950500188571937	20.412031896170475	20.424336899782492	20.40755787746609	20.414664738584577	20.658390551191516	20.641910646875814	20.640856752615683	20.647490482077803
Patient_vs_Control	O75554	WBP4	0.2391855272860255	17.726758198629135	18.22354976092817	1.5564125146854482e-7	3.8113488019824584e-6	7.940448677581411	17.611134481267374	17.588195038589163	17.621835536013467	17.60749668407448	17.82945145292735	17.854996751645356	17.85525252886684	17.845703115649037
Patient_vs_Control	O75569	PRKRA	-0.121638	16.876283896182155	-6.35583	2.751210034452378e-4	8.482058988914674e-4	-0.348698	16.947917480800694	16.94378073558878	16.92358615135838	16.933127025695832	16.767548271818054	16.829753724036276	16.848812705044296	16.81574507511494
Patient_vs_Control	O75570	MTRF1	0.0449932	16.025889893283427	1.3551975007716042	0.2143466007192381	0.26094679534042625	-7.31983	16.023265881250175	15.954629108188998	16.03448929751037	16.0012	15.96229175240268	16.084335534676637	16.10015632631029	16.04676243523556
Patient_vs_Control	O75581	LRP6	0.055285333196501085	17.02464758644949	3.1605091100210787	0.014343044884057887	0.023862591420230277	-4.64731	16.98725383987622	17.008518080408255	16.993123547171013	16.99912421194947	17.094932889280393	17.036622224037103	17.025	17.05265212019487
Patient_vs_Control	O75586	MED6	-0.0200882	14.047060874450192	-0.185634	0.8576015531882394	0.8821251643020882	-8.23043	14.001570693769873	13.883206786022116	14.25445270772186	14.089189654180766	14.287546313986168	13.985812028225851	13.844022709124976	14.030686102569922
Patient_vs_Control	O75592	MYCBP2	0.039216631215452935	19.69084450312904	2.409008565824439	0.044215	0.0644299	-5.81318	19.677406549074032	19.693447196331675	19.646661211705727	19.667429792973817	19.682524149930412	19.71568330323833	19.732346356114867	19.71125746566345
Patient_vs_Control	O75607	NPM3	-0.0579184	14.129181264605094	-5.38332	7.88723258042169e-4	0.00202008	-1.51035	14.15610846289928	14.164084166263187	14.154083387395488	14.15828584765465	14.10899470435401	14.096394172408798	14.09507769537444	14.100421680490902
Patient_vs_Control	O75608	LYPLA1	-0.178428	17.22359267357856	-8.20068	4.975071971299303e-5	2.191072107022166e-4	1.5484053808584992	17.304904621936554	17.36087676393422	17.274158574391624	17.311285867221212	17.167693471183423	17.115530197909546	17.11826218881611	17.136029703235778
Patient_vs_Control	O75616	ERAL1	0.0662394	19.634205801005038	2.4716830769144456	0.040190814588334546	0.0590965	-5.71634	19.604835357187767	19.530701391606858	19.66302358304741	19.605784053276675	19.65304255754726	19.683823982418296	19.667560455039276	19.664875027916764
Patient_vs_Control	O75643	SNRNP200	4.23900780930353e-4	19.406370053323922	0.025199986222374224	0.9805460576939903	0.9859148425186328	-8.24951	19.414317828359177	19.41976401634244	19.38810832360978	19.40244224342244	19.37015403320988	19.416	19.433077900128307	19.407093589112463
Patient_vs_Control	O75648	TRMU	-0.112185	15.92335549965969	-5.17413	0.00100531	0.00247414	-1.77685	15.987546039328684	16.017896906195926	15.938674316168052	15.973675505111512	15.830311916829526	15.872650418287048	15.89744420850576	15.868644686851017
Patient_vs_Control	O75663	TIPRL	-0.0708782	15.309917919341675	-1.93283	0.0913405	0.12296618971028074	-6.53232	15.320908712774555	15.354054936810682	15.354108175982748	15.352356299130175	15.38204033173807	15.238398017835223	15.20279753783208	15.274679342629875
Patient_vs_Control	O75665	OFD1	0.27536000420296247	19.126370053313842	3.990683814088838	0.0044636	0.00867072	-3.40059	19.018555495236928	19.122211341331663	18.84590132304931	18.96809204523153	19.128037781939497	19.28523487347223	19.374071205738673	19.268856360510902
Patient_vs_Control	O75674	TOM1L1	-0.259454	15.453978058326452	-4.17762	0.00347908	0.00698494	-3.13114	15.623666754648632	15.62159425250973	15.521649510383426	15.56790924242061	15.146768025403222	15.37495222435492	15.449535116473967	15.325749340417104
Patient_vs_Control	O75676	RPS6KA4	0.0928727	17.570939825974563	4.252896812461361	0.00315152	0.00642805	-3.02396	17.53324603534311	17.561110942551565	17.484976036322916	17.518680964428608	17.57764054790279	17.62397117679284	17.64919664144001	17.61869626301465
Patient_vs_Control	O75683	SURF6	0.15799	18.21720868233064	10.190562829035304	1.0844642412489988e-5	6.86796000832627e-5	3.242888199109089	18.14556530414075	18.14809866383965	18.12412645038841	18.13506414216749	18.263459269670143	18.305068209708015	18.31970594472964	18.29658147400102
Patient_vs_Control	O75691	UTP20	0.12386254459171653	19.353252123842807	11.098107493200295	5.890669940900214e-6	4.4252748877009635e-5	3.9216913420708046	19.29257714998834	19.302294536762354	19.280405077587552	19.29000664184956	19.409290382647672	19.415223834358628	19.42064606671417	19.415573300834197
Patient_vs_Control	O75694	NUP155	-0.0523808	17.37970462388199	-2.8072	0.024204552317850316	0.037805698614961074	-5.195	17.395087720522643	17.41581121687451	17.40419953073637	17.408481559710697	17.400866904478768	17.336600732380028	17.322773684104718	17.35381564224821
Patient_vs_Control	O75695	RP2	0.034134017530860206	18.695498717356365	1.2940278895863675	0.23368089354907812	0.2823660242752554	-7.39424	18.67685624660526	18.747723463119605	18.616008995173377	18.673138129465514	18.717295182067534	18.699326088643964	18.718654459306855	18.71498717446882
Patient_vs_Control	O75716	STK16	-0.0468413	9.190681759078931	-0.612772	0.5579553104463661	0.6103654946635754	-8.0426	9.246296169250265	9.365946377176646	9.052929970391276	9.191237205751374	9.020391854950365	9.188840808522356	9.287092290169266	9.172719396419897
Patient_vs_Control	O75717	WDHD1	0.29496655987350806	21.920401730005633	13.281280686903324	1.6030499915383495e-6	1.6866672965724824e-5	5.36709	21.759415263493295	21.78981268116315	21.7667	21.77577374214428	22.126905592047336	22.04603708930076	22.03017791560947	22.06841944281198
Patient_vs_Control	O75718	CRTAP	0.00791959	17.29458215808567	0.43057695661963885	0.6787541629047998	0.7244939186567533	-8.14628	17.293838703886507	17.33007535192757	17.252266989133226	17.286308411216794	17.28309094717192	17.296841747947777	17.314296907368266	17.299938206033307
Patient_vs_Control	O75746	SLC25A12	-0.2602	17.888302577627034	-6.72531	1.8996114197947816e-4	6.234140488692807e-4	0.0612986	18.04296157667683	18.03888417396188	17.982835407281478	18.00892966389729	17.64921849771036	17.789806441708613	17.834759950881306	17.759
Patient_vs_Control	O75762	TRPA1	0.30608474442504985	20.96056758135182	5.307839055723225	8.602939474247973e-4	0.00217366	-1.6058	20.81507171898522	20.64598540664584	20.9504	20.81864196447274	21.085497781499555	21.149973369867094	21.110987310034403	21.107981352856314
Patient_vs_Control	O75781	PALM	-0.683151	12.41160325364271	-15.0777	6.323389009615874e-7	9.018239560198265e-6	6.396943222167247	12.775614609755332	12.655878538941582	12.827001445581764	12.75422119788406	11.974182206309784	12.117321921950214	12.12189253479766	12.066713573921287
Patient_vs_Control	O75787	ATP6AP2	-0.218581	17.544423138618942	-3.35844	0.010766229409585803	0.018545649244820838	-4.34373	17.68684214886757	17.757502274779757	17.535940761952382	17.634569580598075	17.285679854568194	17.4657	17.550269413423084	17.438910893265586
Patient_vs_Control	O75792	RNASEH2A	0.23115999205339222	19.927791470555977	4.086184276939969	0.0039275	0.00776159	-3.26235	19.810418226637243	19.656113896079223	19.956488827072505	19.82582494832816	20.05628209880598	20.065614713590648	20.013695308519218	20.03789374541485
Patient_vs_Control	O75794	CDC123	0.0539238	17.380430855013806	1.4427597477643954	0.18910018220875552	0.23336311145653754	-7.20973	17.335024831061272	17.294983741838777	17.41968127846173	17.364185980702217	17.490622389855275	17.39050245359195	17.343181546911488	17.405264617687738
Patient_vs_Control	O75808	CAPN15	-0.0731552	14.321060523160863	-1.55061	0.16166264703647137	0.20314242792295886	-7.06885	14.38496773399273	14.410496242669504	14.290505084799642	14.34458337566046	14.162240132451094	14.31487802819526	14.374361810877229	14.286451776640986
Patient_vs_Control	O75815	BCAR3	0.1464341575764898	23.300722764689237	5.362684022301617	8.076155801365673e-4	0.00206124	-1.53637	23.244104199326703	23.194679080539284	23.24623562525497	23.22500383848301	23.301776354140863	23.40271104133821	23.41841168015757	23.3729
Patient_vs_Control	O75817	POP7	-0.634794	7.7862651972992705	-9.72884	1.507133134300077e-5	8.775985762886095e-5	2.876721594522998	8.138368938606849	7.9696524044596755	8.202733298265816	8.103894992367497	7.320072539241334	7.5394079315716915	7.551671544224927	7.464319929656376
Patient_vs_Control	O75818	RPP40	0.026484092996019726	14.519918962184198	0.6860572643528698	0.5131065665495171	0.5672527099083382	-7.99161	14.488743074506276	14.440625897154511	14.579473659032825	14.517865032051132	14.614382181206713	14.518196414934016	14.469295513864257	14.53076992472385
Patient_vs_Control	O75821	EIF3G	0.2244013074863247	21.230586699819916	21.554608451949193	4.4547051269471635e-08	1.6596049406616423e-6	9.305143902332269	21.11697887119333	21.119448959153225	21.118374446537413	21.118741907423036	21.34896027218483	21.340621355568164	21.338749186694265	21.342818599805067
Patient_vs_Control	O75822	EIF3J	0.0997132	18.457653745498583	2.7237042969574117	0.0274397	0.042182	-5.32493	18.43194810674617	18.3797	18.417072188443008	18.4025	18.40188351460808	18.54625748077713	18.575273342077153	18.50662701494923
Patient_vs_Control	O75828	CBR3	0.11141412005994944	11.183713385852784	1.7065067151477364	0.12838491290658735	0.16627645158636056	-6.85622	11.087989316008889	11.231820740666196	11.060239495340664	11.131975751275483	11.41260746310142	11.166138405530567	11.13604819326004	11.242887721639011
Patient_vs_Control	O75832	PSMD10	0.22731241896330978	12.441674138590656	8.287756596008013	4.625469257636895e-5	2.0657600317593034e-4	1.6294042785220189	12.314715114629283	12.287851164011697	12.373926333526548	12.335579104268476	12.615295096522129	12.542828143343655	12.509332085802724	12.553866066620742
Patient_vs_Control	O75843	AP1G2	-0.834284	10.563096260109884	-6.81359	1.742630290992027e-4	5.842372077513214e-4	0.15686115697643466	11.063280485104542	10.865319034805903	11.028753006751836	10.9636	9.78334	10.282065988755088	10.376129819449933	10.142281533652248
Patient_vs_Control	O75844	ZMPSTE24	0.28822318278126957	19.62213789311472	9.292259485584587	2.0836451821522526e-5	1.112809689535029e-4	2.5163488181554374	19.47685311383813	19.561297407349137	19.402517496990207	19.471437188718845	19.76875669169148	19.75136086457605	19.775717859774417	19.76916252197947
Patient_vs_Control	O75845	SC5D	-0.687216	19.791324127086764	-18.0769	1.6527204856421425e-7	3.946820548485033e-6	7.87461	20.143112405126416	20.228466675674944	20.04361979822567	20.124529077876428	19.408636445172647	19.444473372908895	19.486726386670632	19.45102885503847
Patient_vs_Control	O75864	PPP1R37	0.066174	13.316906822454252	5.3837797864209245	7.88308884788215e-4	0.00201973	-1.50977	13.279686376482486	13.27652149737808	13.293335347464296	13.28573610016833	13.368460057275955	13.3453	13.336508592659358	13.349720433989908
Patient_vs_Control	O75874	IDH1	-0.469232	13.745499078964322	-19.9764	7.857565691997187e-8	2.4107539782757757e-6	8.687856629521658	13.966649783795692	14.011433873615774	13.960623573554614	13.981752615085924	13.56927401691014	13.486798572094887	13.475536926152415	13.511923270505136
Patient_vs_Control	O75879	GATB	-0.00458147	18.8814	-0.204846	0.8430845557712656	0.8692747001188622	-8.22621	18.895157579170466	18.908861785545824	18.85277925532054	18.87796248043759	18.827720778157996	18.891387124724268	18.917287538028667	18.880039787195457
Patient_vs_Control	O75880	SCO1	-0.255685	18.29254580765121	-13.9161	1.1393345398751416e-6	1.316364052241817e-5	5.7455209552288125	18.424725774191977	18.378627745879033	18.45569158480896	18.422507852595313	18.146908583902945	18.177491245809087	18.171155198771828	18.16325847525053
Patient_vs_Control	O75882:Q5VV63	ATRN:ATRNL1	-0.0820591	16.03379970207163	-2.16556	0.0641026	0.0897731	-6.18549	16.05089999993855	16.121994213325326	16.047973432440507	16.078449380768262	16.096809795472943	15.951317467938985	15.928632442827844	15.99432088386063
Patient_vs_Control	O75884	RBBP9	-0.198806	12.895818286342196	-9.29721	2.0758623312422486e-5	1.1115905605481834e-4	2.5205121399639268	13.000956323815108	13.039792564325612	12.950452521861308	12.989683488131543	12.769690265140198	12.797477227207242	12.820492196028704	12.79800170422785
Patient_vs_Control	O75886	STAM2	0.34475209206786417	23.679054992023353	11.418523863116661	4.799504196086528e-6	3.7835060932816795e-5	4.149442105150378	23.487937881283337	23.542163815976455	23.486978376437875	23.50963571026002	23.932960041873283	23.81919677777043	23.800972733822213	23.852594598763204
Patient_vs_Control	O75891	ALDH1L1	-0.163056	7.46326	-1.38283	0.20607871544646145	0.25197367384294395	-7.28553	7.626018402972086	7.467536597271069	7.560029675374902	7.525577608677513	7.025918341871877	7.509289722809872	7.612357362392272	7.3793741034118465
Patient_vs_Control	O75907	DGAT1	-0.00130977	14.978784215947519	-0.02257	0.9825759572710395	0.9868043640825309	-8.24958	14.943658371009397	14.92901844025801	15.050118739192415	14.99496085967959	15.137571408333509	14.935352490196568	14.863383554380562	14.976209864530096
Patient_vs_Control	O75909	CCNK	0.1266730302085719	15.249636613133388	11.321778285615192	5.102934410999553e-6	3.964002879693483e-5	4.0812949310743445	15.188086450613843	15.174640209189784	15.195763620714825	15.186710111597955	15.305467160858315	15.317360101427996	15.316493097793655	15.312572152870729
Patient_vs_Control	O75912:Q13574	DGKI:DGKZ	0.14828353512079318	18.95030976222102	7.297450200907906	1.1019685997463298e-4	4.068035750934126e-4	0.6650854878200914	18.87273958837027	18.925684957439493	18.833134649627997	18.873112783204736	19.037987721613323	19.01172225526352	19.021924027423022	19.02617211482582
Patient_vs_Control	O75915	ARL6IP5	-0.183002	17.997128312912377	-9.70034	1.5387370430945666e-5	8.91027588316933e-5	2.8536323707613214	18.08622478807932	18.13368918771358	18.048980399155987	18.08562315533568	17.914790247097613	17.895058867082348	17.905463855015945	17.90719600381855
Patient_vs_Control	O75923	DYSF	-0.250417	19.798864246906863	-14.5671	8.146904370405822e-7	1.0604045588447412e-5	6.116785800296757	19.914517787625066	19.933457949635084	19.922	19.926307729808933	19.715501016819317	19.658604295566356	19.646574189477157	19.673944019930097
Patient_vs_Control	O75928:Q9Y6X2	PIAS2:PIAS3	-0.244838	7.535625084326069	-7.58133	8.513582126935805e-5	3.3190697645961155e-4	0.9515119683101076	7.679316822310282	7.642912648876005	7.657360871286076	7.652586148226344	7.319858103708048	7.445801327707559	7.474398233731963	7.412766518762273
Patient_vs_Control	O75934	BCAS2	-0.0880083	15.156225624834702	-5.42571	7.514266917788991e-4	0.00194227	-1.45708	15.208962490601394	15.198165674435614	15.196148340312291	15.197642525700449	15.073768019043651	15.12494365814958	15.137987887772208	15.112186402662426
Patient_vs_Control	O75935	DCTN3	-0.0277406	17.20187047575184	-2.40271	0.0446413	0.0649345	-5.82289	17.212133052532643	17.221775191844337	17.212678353505705	17.216376558780716	17.203720370297553	17.18192142572716	17.178162615091292	17.188196238235303
Patient_vs_Control	O75937	DNAJC8	0.0394287	17.698214016726585	2.1928658818978675	0.061486608958594084	0.0865262	-6.14412	17.668271370556877	17.688429555840813	17.67639560266001	17.68090208202177	17.762726650342714	17.701834479840382	17.688919661348635	17.71823273120149
Patient_vs_Control	O75940	SMNDC1	0.038771032951176565	9.364374149171399	1.113492264146494	0.2995516573219252	0.35319331531805226	-7.60044	9.322229055843485	9.34058	9.3646	9.352550080889689	9.484292279999654	9.352157812068144	9.31508	9.383507943999987
Patient_vs_Control	O75943	RAD17	0.21137054773670982	14.083014891867705	2.64892	0.0307171	0.0465461	-5.44128	13.999484786603704	13.760559911432294	14.160827920675969	13.988445853285436	14.09791935060152	14.254568234459075	14.22111461509586	14.181198462787783
Patient_vs_Control	O75947	ATP5PD	-0.115954	17.505857592691953	-2.7356	0.026952499254848026	0.041503	-5.30642	17.581089679239287	17.461739712638202	17.6456	17.566914492206244	17.375039422374524	17.488583938718627	17.483523057108588	17.44437669653536
Patient_vs_Control	O75953	DNAJB5	0.0690555	12.121308533288268	1.842364635224456	0.10472302350695673	0.13873140741070356	-6.66366	12.077026705857032	11.998215643850363	12.174615184538222	12.097265677487147	12.201698300369276	12.156056461748724	12.11289918460695	12.152691107848424
Patient_vs_Control	O75954	TSPAN9	0.10564739227797304	16.284857084022693	3.02405	0.017527899896312538	0.0284293	-4.8582	16.236899239242764	16.3217	16.14653156036331	16.223001117477843	16.313345184329652	16.33034751228887	16.36618667942777	16.34084374460044
Patient_vs_Control	O75955	FLOT1	0.261508	23.05045242839862	6.862256098594201	1.6622897715477426e-4	5.641462744762217e-4	0.20916733422188472	22.89864118304926	22.989756980153516	22.86989824053654	22.920497546134424	23.271844582566217	23.14019434834723	23.129214942681894	23.183571603719905
Patient_vs_Control	O75962	TRIO	0.0653897	21.98859348757307	2.391343150338129	0.0454215	0.0659084	-5.84041	21.939016418168595	21.94448184694862	21.977908262477996	21.962188053193664	22.096120638406273	21.9991	21.969076081428508	22.020816258875104
Patient_vs_Control	O75964:A0A3B3ITX4	ATP5MG:NA	-0.352271	17.04714416895023	-14.4543	8.625539361383534e-7	1.1002555202050157e-5	6.053623471407793	17.236812253703942	17.24560381190206	17.1936	17.217137018272265	16.81060161682683	16.886670673055395	16.914914055091693	16.871848799089438
Patient_vs_Control	O75970:Q8NI35	MPDZ:PATJ	0.28654930414585067	20.999715082756012	13.854672785387734	1.1768495324999839e-6	1.3448130338520942e-5	5.70964	20.84396900687499	20.86658065309207	20.855677895764245	20.859534167001037	21.197675639199556	21.12367873896506	21.10731267178424	21.143291889366896
Patient_vs_Control	O75976	CPD	0.20331567598877953	20.136537157925197	9.741374484548126	1.4934565313077984e-5	8.703287782609373e-5	2.886863945977886	20.04345066831597	20.068038246594195	19.998629244040668	20.02939912077239	20.199324982452488	20.24509466945113	20.268966805538007	20.239393526236736
Patient_vs_Control	O76003	GLRX3	0.020153522383509426	17.388840540332428	1.9276798352053401	0.0920557	0.12383768753611323	-6.53985	17.378605344599027	17.38515486662457	17.373015229534698	17.37827967580439	17.399411403646234	17.397677525706257	17.39943969020511	17.39914058653914
Patient_vs_Control	O76021	RSL1D1	0.0772851	18.343213781100932	4.463983930674135	0.00239915	0.00511343	-2.72761	18.296813646906894	18.285013017661733	18.327800746210624	18.3087	18.416701151425304	18.373951841475417	18.355634467708903	18.381137880662877
Patient_vs_Control	O76024	WFS1	-0.323077	18.780824665729302	-16.2729	3.601933042046016e-7	6.35714183206997e-6	7.018033505231207	18.940825969362223	18.99090934826923	18.89892563207266	18.93879127123227	18.624511055390485	18.609395500293957	18.62225763704254	18.620980912171056
Patient_vs_Control	O76031	CLPX	-0.0880922	19.634157963801908	-3.70814	0.00656917	0.012143808705762668	-3.8164	19.69269465386076	19.68451161299337	19.6625	19.673097518848028	19.525992646086976	19.609676726507324	19.634383359199735	19.59039468342867
Patient_vs_Control	O76054:B5MCN3	SEC14L2:SEC14L6	-0.169283	17.539158858755272	-5.31191	8.562540071315943e-4	0.0021657	-1.60063	17.642277916091334	17.65412104521437	17.583375166916248	17.615426505750126	17.372041846005704	17.47592810530718	17.514441400887872	17.455658883869333
Patient_vs_Control	O76070	SNCG	0.1991398760241978	17.518316331678058	8.977703886790518	2.6529809776757852e-5	1.336926645892932e-4	2.2476153043011298	17.40526983704747	17.43573564406842	17.41239476529469	17.421585328253258	17.67678634451703	17.596061055874852	17.580273532513676	17.61842414585506
Patient_vs_Control	O76071	CIAO1	0.034773583672059516	18.992245630502897	2.349086107146999	0.048444403927709295	0.0699093	-5.90545	18.982142492302845	18.977204540137784	18.967727345835904	18.972360976390945	18.977429485893804	19.019597630045308	19.031756889513247	19.009745683903347
Patient_vs_Control	O76080	ZFAND5	-0.0350359	16.751335564146398	-1.34796	0.21656052422147132	0.26342244675415355	-7.32875	16.783131889732708	16.726562983463385	16.797843261031513	16.76787586923196	16.672191262408248	16.760798743082916	16.76988395703654	16.73239654718391
Patient_vs_Control	O76094	SRP72	0.2762473589023706	19.8123	11.738109375136544	3.932547461338574e-6	3.285521917928405e-5	4.370863992376954	19.65943426124105	19.68455293302234	19.67470024485381	19.677940978718052	20.015013064620515	19.927857432175536	19.90804138306115	19.950705973587564
Patient_vs_Control	O76095:A0A3B3ITX8	JTB:NA	-0.0759714	13.686561059816965	-1.89719	0.0964032	0.12887883729196697	-6.58432	13.751361580010949	13.71897939638109	13.711308113993894	13.716537978412235	13.53047506405877	13.687517782024072	13.727813951908107	13.6485
Patient_vs_Control	O94760	DDAH1	-0.428203	18.30190917727113	-6.00228	3.9799760536905575e-4	0.00114211	-0.756733	18.55894026650253	18.589225189327433	18.41955327838889	18.496324910851563	17.896102971384416	18.137110698319823	18.22745996035911	18.09055614303528
Patient_vs_Control	O94763	URI1	0.17539030711310488	20.33576848796478	6.92904	1.5586774346797546e-4	5.367318193019758e-4	0.2805026076614041	20.25765535398903	20.2954	20.198110758549117	20.24108615525367	20.379680422770104	20.4295	20.45946835297477	20.42516439634925
Patient_vs_Control	O94766	B3GAT3	0.049474121551249084	25.13569311708318	3.2585092404730336	0.0124363	0.021035485969433648	-4.49661	25.110850585291765	25.079263001596793	25.14007231889638	25.113638319445275	25.16191071800107	25.16531336252944	25.155177511635912	25.15931911926879
Patient_vs_Control	O94768	STK17B	-0.151198	14.17831914931585	-6.62669	2.093893238533602e-4	6.765586040965635e-4	-0.046549	14.267384686359328	14.228535711500166	14.26796780186072	14.251783617930691	14.04413248196927	14.125864427114427	14.138996154381454	14.101888313410749
Patient_vs_Control	O94776	MTA2	0.0414911	18.282901167560528	1.9008260095070357	0.0958748	0.12827137545702813	-6.57904	18.249171459631786	18.255660057903917	18.276989120037175	18.266801816931775	18.36112719111234	18.28624978002611	18.263846187245072	18.303363727596057
Patient_vs_Control	O94804	STK10	0.1190592542141573	20.297094078507634	8.03633	5.7185073529373964e-5	2.4505012142693e-4	1.3936106067866625	20.239097712787164	20.266414750187227	20.21007676995041	20.234668572677418	20.34893633183183	20.354218418875803	20.365698836291138	20.35764123546009
Patient_vs_Control	O94808	GFPT2	0.0363531	24.887268090823284	0.5231695009396077	0.6157970667277173	0.6648750822483797	-8.0978	24.838116230757336	25.033823432671714	24.739314435206097	24.86511203028223	25.03679765310479	24.83532178642577	24.8386	24.911085195010443
Patient_vs_Control	O94817	ATG12	-0.207429	10.111212055510421	-8.68391	3.3463564612489007e-5	1.6033526824172883e-4	1.989354782270933	10.226239368517671	10.248855092231622	10.176096694938629	10.208515985863995	9.956511230864194	10.018165461977894	10.04657810231247	10.008734507376891
Patient_vs_Control	O94822	LTN1	0.1330880581043843	22.61362676844686	5.186136553505811	9.912434366977977e-4	0.00244364	-1.76139	22.53335565664638	22.51836657889703	22.582787779718178	22.553820942317085	22.74164013997369	22.665248063551783	22.634689020170843	22.6791
Patient_vs_Control	O94826	TOMM70	-0.120624	20.000509779719664	-11.4307	4.762804725521308e-6	3.776112932221128e-5	4.157974521911839	20.059127892893045	20.064765636521845	20.05836636454051	20.06102758213465	19.94754338277057	19.93716715297785	19.93575155956703	19.9403
Patient_vs_Control	O94827	PLEKHG5	0.1809925220791193	16.07512120835357	15.811937347196105	4.4536993669643224e-7	7.1948922074277615e-6	6.7839802573162995	15.982792754862686	15.998197965398196	15.973439549698714	15.984069519296431	16.17326434518026	16.16086162926886	16.16225861272355	16.166085290399835
Patient_vs_Control	O94829	IPO13	0.21535175522649297	23.75403388982155	11.705309371039133	4.012870690023353e-6	3.3259911212883686e-5	4.348395168646535	23.647847628346835	23.68836824379142	23.60684016838104	23.64237600831393	23.853793321011544	23.857152728078603	23.872704750507893	23.86318827014113
Patient_vs_Control	O94830	DDHD2	-0.0782261	16.189141808655837	-4.41062	0.00256882	0.00539792	-2.80194	16.233787386713196	16.190987817856612	16.258622956436813	16.229621251577328	16.12681894765363	16.16379913417704	16.16075055243601	16.148746422396066
Patient_vs_Control	O94832:B0I1T2	MYO1D:MYO1G	-0.196695	16.928750022344254	-3.12682	0.015067938822246772	0.0248815	-4.69927	17.07008637225305	17.01804229262229	17.00599279155906	17.014269003616228	16.641071513946084	16.892854465978548	16.957415301280133	16.83026843749863
Patient_vs_Control	O94851	MICAL2	0.2913430900541023	22.786040309181693	14.914912868204784	6.849258717530943e-7	9.487016850190423e-6	6.308649128948311	22.65027386335635	22.65930001632293	22.61624494786891	22.635656229070364	22.88741453566795	22.942763888386143	22.96425149582089	22.932417496959996
Patient_vs_Control	O94855	SEC24D	0.0534334	17.7722	4.996490587078426	0.00124122	0.00294075	-2.00797	17.74622404748723	17.736621646111455	17.753070919795327	17.745975491433377	17.795877288039826	17.80137797150911	17.799771032584154	17.798599466645907
Patient_vs_Control	O94864	SUPT7L	-0.162051	12.023211722970178	-2.10255	0.0705675	0.0977954	-6.28046	12.157303145840736	12.069326521231384	12.099933825135563	12.090384789885322	11.709233265409198	12.023047001711609	12.095275911265626	11.941189323281987
Patient_vs_Control	O94868	FCHSD2	-0.019862	15.425412830628824	-0.467306	0.6534168500755613	0.7000855514005866	-8.12811	15.413224779866752	15.37321551853758	15.507408261238592	15.447526680042555	15.51503799073316	15.393954277244992	15.339724755419349	15.413210381947607
Patient_vs_Control	O94874	UFL1	-0.283462	19.18248452380065	-9.65447	1.591194993648134e-5	9.144815879051521e-5	2.8163347030498116	19.331047724036964	19.39315367809282	19.256365673307915	19.316294187962644	19.008407862525456	19.039503523196785	19.071904888685353	19.043198652597273
Patient_vs_Control	O94875	SORBS2	0.33882949760236336	15.194722787239314	7.49955	9.163266179548918e-5	3.508661229316529e-4	0.8698568027096876	15.04348364914877	15.1154	14.930286593512458	15.012031623789902	15.281078789711025	15.375622745126927	15.432475438440685	15.367373170883354
Patient_vs_Control	O94876	TMCC1	-0.230155	12.089655664402933	-6.30287	2.9049366544666176e-4	8.830910678982199e-4	-0.408827	12.219329875946736	12.117452683772663	12.274734722136984	12.207415157296383	11.912988798677082	12.00915563822904	12.004586508502564	11.971581930662015
Patient_vs_Control	O94880	PHF14	-0.407661	16.893241749811914	-14.0348	1.0705699068934083e-6	1.2660117335671675e-5	5.8144675200755955	17.11564725549628	17.072839642192097	17.106575092994404	17.0932	16.608254885838527	16.719622535654455	16.741125738745232	16.688641097389322
Patient_vs_Control	O94886	TMEM63A	-0.117444	16.192536071021237	-2.88047	0.021692661072520845	0.0343377	-5.08105	16.27863687052322	16.243166759630704	16.239946990050765	16.243282184238055	16.013307373240842	16.173957477766216	16.2143	16.13364715473499
Patient_vs_Control	O94887	FARP2	-0.45806	11.908033127621795	-17.3582	2.2332952593932433e-7	4.782264511463186e-6	7.544083989807122	12.152791028423792	12.153742379895062	12.111020658383508	12.130698797457455	11.60909420509744	11.69867689718616	11.728586460119008	11.67965459441194
Patient_vs_Control	O94888	UBXN7	-0.146584	13.543578212869171	-8.08062	5.506634174456082e-5	2.373638886769676e-4	1.435570461766071	13.610338863460584	13.653441380582532	13.587822597184276	13.615877417689363	13.497923533002863	13.455209060320756	13.456472786720877	13.471540063992116
Patient_vs_Control	O94900:O15405:O94842	TOX:TOX3:TOX4	0.18949606120138895	16.512408462335227	3.0897835807183003	0.0159097	0.0260759	-4.75647	16.37568418900956	16.43242853012828	16.432837421731115	16.42969158606917	16.791838250078513	16.54523432792675	16.484058399802567	16.60749499393586
Patient_vs_Control	O94901	SUN1	0.0483972	20.016311029094012	3.290805903885307	0.011868372771235937	0.020215268946947706	-4.44711	19.99402651762929	19.962190131878124	20.018224551691965	19.994008433883053	20.03302520703365	20.04797802777504	20.04156610655221	20.039469256308763
Patient_vs_Control	O94903	PLPBP	0.014847670564435589	16.335114298149538	1.2199908709494165	0.25905676516164944	0.3098497132203709	-7.48133	16.328078365786286	16.308833614338926	16.34470592391838	16.329143947425685	16.341431210121513	16.34608316609806	16.340759163866547	16.341878993640908
Patient_vs_Control	O94905	ERLIN2	0.16869428914703377	19.20780106251705	10.463531759588166	8.981797193560306e-6	5.9895053066098047e-5	3.4525497036564037	19.11925055127487	19.15658064311044	19.095970955458828	19.122	19.309627780825785	19.28092181102605	19.28475210673044	19.293291129779988
Patient_vs_Control	O94906	PRPF6	0.013063914246188801	19.06826099619456	0.7801181165491319	0.4589816336484216	0.5138736413524646	-7.9188	19.068396947294147	19.084008904716292	19.03675065136339	19.05775965291203	19.04466742801448	19.080718672466876	19.098183577775146	19.075602135014112
Patient_vs_Control	O94913	PCF11	-0.096895	14.887126335004359	-6.53611	2.2919504966114018e-4	7.311412200199412e-4	-0.146609	14.936367748408356	14.904942710765694	14.963101750772934	14.937883105951297	14.836158200047008	14.844669896410004	14.836278436609264	14.837608831070316
Patient_vs_Control	O94915	FRYL	0.43610206178816924	21.400384934514978	22.342746107898463	3.4058177007935554e-8	1.405044115886697e-6	9.595968091710603	21.1935	21.18778582875353	21.169674001427005	21.178337321972936	21.568838624912793	21.63347285238053	21.652757585905437	21.618674798437493
Patient_vs_Control	O94916	NFAT5	-0.114434	10.902065401693758	-4.50395	0.0022801	0.00489108	-2.6722	10.974042038887506	10.978067935652366	10.932	10.95304780667209	10.779142432385278	10.862813779434187	10.891867945602709	10.845569708021518
Patient_vs_Control	O94919	ENDOD1	-0.0678947	21.59459269718845	-2.87474	0.021879	0.0346026	-5.08996	21.6243	21.57313681940372	21.682191467548577	21.63450082609864	21.580986114003053	21.56346953476679	21.53943988991154	21.558685945799567
Patient_vs_Control	O94923	GLCE	-0.109773	19.02214287423009	-3.37544	0.010506683511604964	0.0181671	-4.31781	19.08873135026342	19.143788970972427	19.00784586329412	19.067751525455648	18.913501094791037	18.97326342393283	19.012615108326983	18.96964565680426
Patient_vs_Control	O94925	GLS	-0.772547	17.21393030241798	-25.3516	1.32185528659212e-8	7.847306750159074e-7	10.614023603869551	17.618749113752255	17.620022550634907	17.56935733219924	17.592686775249298	16.745220042268375	16.850830657355836	16.88614570141023	16.828430246473715
Patient_vs_Control	O94927	HAUS5	0.24731285002129333	13.448312708808333	7.753716305457303	7.305970205954627e-5	2.9572169869113466e-4	1.1214081733128793	13.345352777883113	13.32779926454058	13.307620082923968	13.31785300984308	13.480577364739478	13.600844609098836	13.634287026712432	13.572167534725171
Patient_vs_Control	O94952	FBXO21	-0.0712868	11.325151636857074	-3.86486	0.00529412	0.0100442	-3.58452	11.35975267092399	11.404563859373283	11.32139735308371	11.357466188013523	11.292703818762693	11.28107832683353	11.293213290771508	11.291037587094356
Patient_vs_Control	O94953	KDM4B	-0.0245472	9.837673959720318	-0.180294	0.861648	0.8854138673210872	-8.23153	9.944	9.768555178774545	9.86021	9.82703	9.413139191710613	9.971817125972178	10.09369583239751	9.822949249934016
Patient_vs_Control	O94955	RHOBTB3	-0.1686	16.52981624189491	-2.09759	0.0711034	0.0984633	-6.28792	16.611707649139404	16.840524646122972	16.408279137103648	16.595954268383885	16.44888785968752	16.406143488395436	16.473593154936943	16.45343973138947
Patient_vs_Control	O94964	MTCL2	0.4283292667936429	20.815358441735764	8.152127068807625	5.18279911550644e-5	2.2649757018755034e-4	1.5029357834602877	20.575518805222572	20.513636169369487	20.698994402850644	20.61662585591307	21.145579063678152	21.00698669881063	20.939181209008964	21.02634532903259
Patient_vs_Control	O94966	USP19	0.023256082992027416	14.184879515529907	0.7579713329857469	0.4713693668516802	0.5262099245911892	-7.93667	14.155855040522372	14.223724020757327	14.138896214226712	14.174530620629152	14.271625324945637	14.163801681097326	14.15240116200651	14.198202060054228
Patient_vs_Control	O94967	WDR47	-0.0311723	19.98016553778224	-2.42551	0.0431171	0.0630186	-5.7877	19.99697047440338	19.97359866651139	20.01521958250944	19.997218124015387	19.95991316133864	19.96982707582722	19.96476895793444	19.963808259718036
Patient_vs_Control	O94973	AP2A2	-0.105193	18.162968421292735	-9.08484	2.4414977954911683e-5	1.256364827531819e-4	2.3400265618831746	18.218658248902337	18.204948839819608	18.22317837215092	18.215474890807627	18.097068094431837	18.116447753195946	18.11795824676172	18.11001292427188
Patient_vs_Control	O94979	SEC31A	0.0817171	21.22250151765737	5.884158831044724	4.5177948011748415e-4	0.00126978	-0.896621	21.185888804156555	21.199562410756176	21.16231724795319	21.178803489822126	21.244057926032347	21.266540526564626	21.278835637922004	21.264006098051944
Patient_vs_Control	O94985	CLSTN1	0.0482604	14.98612789960099	0.7913731929313256	0.4527712234939253	0.5077769119878118	-7.90955	15.0032	14.968756718935422	14.927652454795773	14.948425847577196	14.828495885273558	15.067600446597805	15.134265652781226	15.010670498462744
Patient_vs_Control	O94992	HEXIM1	-0.358994	13.74990630334758	-9.65398	1.5917640348225806e-5	9.144815879051521e-5	2.815936891643016	13.945297425441034	13.84307063935456	13.997648580185423	13.931595910954282	13.503066390091329	13.60667792915059	13.604441620969473	13.56745193063394
Patient_vs_Control	O95050:H3BSR8	INMT:INMT-MINDY4	0.1879059331688211	16.744612689323645	1.6489864709716255	0.13984540905594708	0.17940112033143457	-6.9358	16.581389533143486	16.53507180754423	16.80396587749648	16.68221167277274	17.147815553737804	16.758605756624977	16.61362157532475	16.834219737944693
Patient_vs_Control	O95070	YIF1A	0.061164004829038277	17.914066617039747	0.8103131948527956	0.4424503868185685	0.49836511878055606	-7.89373	17.931395915794884	17.939260235513235	17.799600568147312	17.863681739045475	17.731527723801268	18.00379203344771	18.096467252142464	17.946807468425632
Patient_vs_Control	O95071	UBR5	0.2097083675218414	21.569764866100314	7.612647332048452	8.278570022797656e-5	3.2640452649281037e-4	0.9825972965751557	21.447251461865857	21.482914902675276	21.460489759339108	21.468986605477337	21.751936106261017	21.646696193410744	21.624669243943373	21.6752
Patient_vs_Control	O95081	AGFG2	-0.0731276	13.320964186517507	-0.907831	0.3919105201215385	0.44804896969111585	-7.8074	13.38036244902466	13.550908365685816	13.164692296315904	13.334148880289389	13.177483783594772	13.286100423861038	13.382742976484492	13.291274316883989
Patient_vs_Control	O95084	PRSS23	-1.23779	21.72942563126607	-12.1652	3.0361008379848393e-6	2.690486446476371e-5	4.658283604454679	22.413820798621018	22.416958770685987	22.24061248893555	22.32188082475328	20.81940586703357	21.19260083629972	21.316907731800704	21.113217731998752
Patient_vs_Control	O95104	SCAF4	0.12204423615442295	16.51262514441131	5.4744791133263035	7.109081511464787e-4	0.00185992	-1.39611	16.454410754680442	16.395245985652707	16.501329278935835	16.455426086067423	16.56306797403579	16.586581816637143	16.573254923280896	16.57168433600024
Patient_vs_Control	O95139	NDUFB6	-0.152895	15.994068793762478	-5.72021	5.402432407484462e-4	0.00147086	-1.09381	16.083630917020855	16.108406293069777	16.026822865024098	16.06320477000496	15.858559300394113	15.930218136747069	15.962702993381871	15.919005074457084
Patient_vs_Control	O95140	MFN2	-0.0492693	20.85471780667399	-1.55428	0.16079488649241933	0.20229570316465298	-7.06395	20.861175402857956	20.847692915883776	20.9208	20.887742974819584	20.91127538931516	20.809311964532412	20.77084904941989	20.82889619746873
Patient_vs_Control	O95149	SNUPN	0.17856920847297353	12.392428263695628	8.917955653633085	2.77979854408869e-5	1.3855350832037963e-4	2.195673552836096	12.292031446115022	12.327285771414092	12.288619856688026	12.30463756361942	12.52995480857498	12.462107492534352	12.452277688252632	12.482511482366492
Patient_vs_Control	O95155	UBE4B	0.15437621947688385	18.02728365044679	14.654847182782067	7.795063331975139e-7	1.0255775216231075e-5	6.165619464459594	17.94977311475656	17.943077957748397	17.95674711999747	17.950783970330956	18.106118777183724	18.105128537503347	18.10241525563208	18.104224470421773
Patient_vs_Control	O95159	ZFPL1	0.3458593051655896	18.674405276864864	12.648738181495894	2.287668177860223e-6	2.1750720097311654e-5	4.972549386357182	18.5095	18.560916796898773	18.441511915625664	18.493970575256935	18.81002145204424	18.849289198814173	18.880576926416985	18.849452140515233
Patient_vs_Control	O95163	ELP1	-0.0271221	17.931712141912225	-1.48228	0.17859526668424236	0.22174845048942995	-7.15875	17.955127961163097	17.955229063888197	17.929409018709396	17.94132673637174	17.87436332049402	17.930556982460853	17.949142056584083	17.918541995626413
Patient_vs_Control	O95164	UBL3	0.059083366970682505	13.821947815367537	1.0304813288625785	0.33453447455340013	0.38965875469595274	-7.68783	13.771230211725744	13.938130046002122	13.673345772573445	13.786918497227472	13.940226914767251	13.79829340281242	13.810931933143518	13.856505744688324
Patient_vs_Control	O95167	NDUFA3	-0.180155	20.273625407557937	-3.91151	0.00496823	0.00951429	-3.5161	20.391375880717277	20.407304806724863	20.304817844282155	20.35131342606661	20.06008742522617	20.21590002552754	20.27301008864869	20.1852
Patient_vs_Control	O95168	NDUFB4	-0.242837	16.575035937413247	-6.4967	2.3845595925640295e-4	7.531165287587606e-4	-0.190453	16.7212	16.696637544701233	16.679352413479712	16.68861491454531	16.344400005528442	16.488728906362162	16.52761067100954	16.45372918931949
Patient_vs_Control	O95182	NDUFA7	-0.0158892	18.190384707158387	-0.694714	0.5079612627898561	0.562408	-7.98525	18.211648482411302	18.211343041106343	18.17729321560345	18.193	18.123272989325802	18.19927750153042	18.224257056370575	18.182952966062597
Patient_vs_Control	O95183	VAMP5	0.2113582565724954	18.208541506556358	3.4638031143944175	0.00926084	0.0162946	-4.18352	18.09536261118747	18.27420002813591	17.950974934849352	18.09091193890771	18.34181274499379	18.27636765542898	18.318509361467456	18.320192777480205
Patient_vs_Control	O95197	RTN3	-0.199035	15.283877153515007	-6.92327	1.5673401696031651e-4	5.388993014741642e-4	0.27435879717828904	15.397722730446336	15.4243	15.336112683018564	15.375448172638384	15.119849081041032	15.198200471448562	15.233534996823114	15.185854000488074
Patient_vs_Control	O95202	LETM1	-0.325631	19.61509746028245	-11.2417	5.370551265009752e-6	4.114980622990683e-5	4.02447	19.794940295200988	19.735873191966903	19.804792872911225	19.776045723929876	19.378522323655297	19.483124705160392	19.496599242401135	19.450881327033787
Patient_vs_Control	O95208	EPN2	-0.0914516	17.88677142326757	-3.57008	0.00796771	0.014365476884628992	-4.02304	17.946936945445454	17.893653469465097	17.958218017256225	17.931180556632246	17.778597288474117	17.86770831702754	17.878130801915972	17.839745989923934
Patient_vs_Control	O95210	STBD1	-0.051321	19.752569984607266	-2.92414	0.020326017844583277	0.0324449	-5.01318	19.76867036726773	19.77268377974621	19.789852478391477	19.78171530176797	19.76925631259873	19.714221614601648	19.69748567641014	19.726674346074216
Patient_vs_Control	O95214	LEPROTL1	-0.0625075	12.283778230392942	-1.33633	0.22015618211237453	0.2675733092184685	-7.343	12.3244	12.433245422489325	12.200319523467131	12.302204071336316	12.20759721194604	12.24698974419703	12.298804267397133	12.256706793399358
Patient_vs_Control	O95218	ZRANB2	-0.0154512	17.550085972208375	-1.00064	0.34786255834182545	0.4031892700019063	-7.71799	17.55149883553163	17.54094516372134	17.577586021696426	17.561216247341452	17.57074581334615	17.536079099582718	17.520874184014954	17.54174241243234
Patient_vs_Control	O95219	SNX4	-0.0567051	18.04266363575424	-2.80095	0.0244327	0.0380888	-5.20474	18.082650582530153	18.05046756032595	18.08188965586807	18.069056895710748	17.963650660970956	18.03408697653306	18.045866117932245	18.01364063616275
Patient_vs_Control	O95232	LUC7L3	0.00877601	18.05566709779744	0.40039018009885985	0.6999137939788442	0.7441424757765754	-8.16015	18.042368138449696	18.015015705936648	18.090606430892244	18.05712608500473	18.100522543801556	18.053166422402363	18.02778511739495	18.058746338497333
Patient_vs_Control	O95236	APOL3	-0.655505	12.715387384241243	-3.77953	0.00595148	0.011117339643667163	-3.7104	13.136098646850428	13.303088088708712	12.741336317438948	12.992035790020603	11.969270712788546	12.47829190526968	12.705836839891594	12.397140772961428
Patient_vs_Control	O95239:Q2VIQ3	KIF4A:KIF4B	0.8566591457162218	25.041081988422768	7.936233874022394	6.231826250073211e-5	2.59878899360563e-4	1.2980838547093914	24.538587700633613	24.688565870601803	24.594002425112865	24.629853665910343	25.794119235246367	25.352110175087077	25.259664852449745	25.47175198234033
Patient_vs_Control	O95248	SBF1	0.0836072	18.937512014221518	3.3703708597723856	0.010583411842144846	0.018278163025388285	-4.32554	18.897470378953457	18.958233360601756	18.83720423654685	18.88992571781302	18.96954067925988	18.97188734744384	18.994320234302833	18.98151415885051
Patient_vs_Control	O95249	GOSR1	-0.0261866	17.336147120121215	-1.27831	0.23888365317365384	0.28793800519544743	-7.413	17.360655966593985	17.362083912603097	17.329662435963584	17.34455936947863	17.27228903293415	17.337216373952685	17.359157297444437	17.323552571999148
Patient_vs_Control	O95251	KAT7	-0.00764333	12.41823826366425	-0.427853	0.6806513974466388	0.7263066643512138	-8.14757	12.432136887129875	12.410521530350028	12.425741536598796	12.419839760700771	12.37033733920311	12.430551155490235	12.442722663008633	12.414055236832557
Patient_vs_Control	O95260	ATE1	-0.152618	12.9306	-9.01701	2.5730926172388046e-5	1.303866918187214e-4	2.2816274282518734	13.01155179412859	13.03748701395791	12.97568617717788	13.002872585005306	12.832779841561884	12.856027053450092	12.872945068607647	12.855372937426695
Patient_vs_Control	O95273:Q9Y2K3	CCNDBP1:MYH15	0.37902665567249727	18.504260148748298	10.685634730252064	7.729390311992863e-6	5.385496952115638e-5	3.619584041954635	18.328607883287923	18.384896066483194	18.24098006823786	18.304503265639205	18.63038581409519	18.7023	18.746110523404045	18.696290804480157
Patient_vs_Control	O95292	VAPB	-0.07849	19.285840441988547	-4.91158	0.00137497	0.00320542	-2.12002	19.329330595801107	19.352917059351103	19.296676444939017	19.321417691820773	19.22697871689737	19.24820090437356	19.263613289249903	19.247588833475557
Patient_vs_Control	O95295	SNAPIN	-0.0365062	10.053776033104429	-1.75232	0.11989114138327846	0.1565531320423282	-6.79197	10.08385037129074	10.083538882471403	10.053395889252055	10.067331326022542	9.983011331835648	10.050473123676134	10.072630645539782	10.035976694747124
Patient_vs_Control	O95297	MPZL1	0.0919866	17.970236000877343	1.6951131321783566	0.1305829759322899	0.16876405137302317	-6.87208	17.887350335098635	17.957594784003447	17.918911784129318	17.933114000059906	18.177891092835292	17.95857148785298	17.911213834151553	18.017240688887615
Patient_vs_Control	O95298:E9PQ53	NDUFC2:NDUFC2-KCTD14	-0.210993	19.88165501684101	-4.66651	0.00185821	0.00409928	-2.44917	20.01762968746633	19.959082803338752	19.99202831982968	19.979865940639456	19.64262079937455	19.823873201761423	19.86283466786288	19.775304714455014
Patient_vs_Control	O95299	NDUFA10	-0.14999	18.105935201207977	-10.2258	1.0581613640674499e-5	6.783752660597471e-5	3.270203286541582	18.18822826312568	18.174806657158452	18.181550351655396	18.17913571632445	17.998945187850115	18.042270677253732	18.05178806459132	18.030756691704685
Patient_vs_Control	O95302:Q75LS8	FKBP9:FKBP9P1	-0.0331327	20.36282384400698	-2.15115	0.0655272	0.0915399	-6.20727	20.38692602342295	20.386357766699717	20.367850682257536	20.37642635709962	20.312794204780005	20.355846628704413	20.369855309335733	20.346533779755845
Patient_vs_Control	O95319	CELF2	-0.690981	15.110758407814599	-8.70499	3.2903436568623944e-5	1.5827463361270885e-4	2.0081285725263935	15.510895067946704	15.43647563997886	15.436992764662548	15.440632063052108	14.52486011411007	14.845967395044733	14.925436148210784	14.764808069510986
Patient_vs_Control	O95336	PGLS	-0.0871023	17.89332707825584	-6.51461	2.3419689939225072e-4	7.444953240584304e-4	-0.170506	17.936063186994478	17.96148695806112	17.914883810870244	17.935078996163938	17.852582702295273	17.844711232162155	17.851174941988692	17.850634797510835
Patient_vs_Control	O95340	PAPSS2	0.5912765699946583	24.26047009972438	20.717371353975047	5.988333432043752e-8	1.9875823054901575e-6	8.983752517591686	23.95933052143832	23.895914313825475	24.031751888389017	23.972330535255388	24.5826	24.5592	24.528937020226973	24.55366987160087
Patient_vs_Control	O95347	SMC2	0.6494655972159507	23.99658795700757	7.661727943635711	7.924663962735165e-5	3.148307739711217e-4	1.0311188333357446	23.614444974889352	23.65793787917969	23.72387642927317	23.691161350256177	24.574999724679717	24.242048420675868	24.147646652063347	24.32058822504323
Patient_vs_Control	O95352	ATG7	0.2310557891138174	20.078371355642588	9.030197764094234	2.5468962823501588e-5	1.2957037614132807e-4	2.2930108548165826	19.96924940800145	20.0203	19.905788695326887	19.956015034701977	20.163801644273494	20.19386379780003	20.221990834345625	20.195940724378833
Patient_vs_Control	O95359	TACC2	0.22681601215698066	13.677484116799985	5.452251922611858	7.290686140814011e-4	0.00189755	-1.42386	13.580135477727284	13.648720642705744	13.47552201125868	13.551926311194263	13.717343492716244	13.800243607670192	13.85205461210957	13.793926779017896
Patient_vs_Control	O95363	FARS2	-0.107097	17.608518002516885	-2.69668	0.028579964249720553	0.0436501	-5.36698	17.688724846818122	17.644361437967518	17.660058003814935	17.655121596131178	17.437948121246976	17.5956	17.631849822734157	17.5545
Patient_vs_Control	O95365	ZBTB7A	0.26318630639380913	21.217386617512165	14.068819074200157	1.0517542759004831e-6	1.252177269375181e-5	5.834102811609624	21.08434230051196	21.042683902264063	21.126292455169025	21.08985519931599	21.35676182399234	21.353765960025957	21.33792839028981	21.34746290852817
Patient_vs_Control	O95372	LYPLA2	-0.185393	17.636052007497604	-8.02474	5.775448018923916e-5	2.4655651959476174e-4	1.3825993519653519	17.718304969192953	17.77476347465377	17.69372312696347	17.72820320366163	17.58794788553177	17.521225338263875	17.519324798649098	17.544923263064263
Patient_vs_Control	O95373	IPO7	0.3353723534187125	24.11540012550484	19.146755215642774	1.0777466242847364e-7	3.0168973142552454e-6	8.342823239685185	23.938996065789112	23.971453064344253	23.931921794263637	23.94848487078493	24.3208	24.26694320163379	24.260741106144316	24.283881005473994
Patient_vs_Control	O95376	ARIH2	-0.051069	14.499963244221247	-3.84253	0.00545824	0.010314713210995214	-3.61738	14.519609775052665	14.526573265469333	14.528539394894915	14.527268613973895	14.500365855017067	14.465901101163697	14.457006643598923	14.474441304599486
Patient_vs_Control	O95379	TNFAIP8	-0.680151	8.338378689887762	-8.15445	5.1726530968456254e-5	2.2644312298061603e-4	1.5051139108928684	8.628708921899314	8.588083842692315	8.795296085266095	8.70173	8.220622131352188	7.942050326042779	7.835615858814201	7.994924153332317
Patient_vs_Control	O95382	MAP3K6	-0.137828	16.124312917805533	-2.68363	0.029148188837633246	0.0444343	-5.38728	16.2172	16.076646447748786	16.283653905867467	16.195388967266034	15.953307074792384	16.10796349221114	16.108908799890628	16.05141581856441
Patient_vs_Control	O95388	CCN4	-0.128241	4.99165	-2.91106	0.0207258	0.0330148	-5.03351	5.033481926561503	4.987606715581126	5.13348	5.068511725191822	5.028027951169241	4.906719526874138	4.850324979084922	4.925045884078275
Patient_vs_Control	O95391	SLU7	0.0663989	13.183495620352781	3.229917951095158	0.012963219303452145	0.021830587489346763	-4.54051	13.154257392055248	13.10035859762266	13.193350599012536	13.153218187722356	13.200822215817368	13.230247310517711	13.220748666488635	13.214961993585735
Patient_vs_Control	O95394	PGM3	-0.0596173	18.01474775599398	-3.40657	0.010048592778124539	0.017486850444677165	-4.27042	18.041394245182698	18.084330646100177	18.010269435472345	18.04223139305287	17.997613102580583	17.974134811538452	17.981689023326446	17.98631939069828
Patient_vs_Control	O95396	MOCS3	0.11404804992723427	16.51200274420387	9.784419329611724	1.4475555567697312e-5	8.524234415752078e-5	2.9215954605199475	16.452768191901832	16.44308849181823	16.46738710007332	16.456671093167632	16.579158195293815	16.56777753918547	16.56057066520738	16.568600676983277
Patient_vs_Control	O95399	UTS2	-0.0689278	13.346775178271512	-4.8219	0.00153362	0.0035083	-2.23947	13.387957110637322	13.370315554367942	13.38665460878218	13.380029007371489	13.283028328894838	13.323580878971308	13.330678790063931	13.311957147083088
Patient_vs_Control	O95400	CD2BP2	0.17653713753757572	17.48426145464982	12.729717017097052	2.183877612583039e-6	2.1093484559631416e-5	5.02408	17.394081522208996	17.371681485227096	17.419579647101607	17.398628888986416	17.58173977791626	17.573677888396507	17.563032491204464	17.571669936157218
Patient_vs_Control	O95405	ZFYVE9	0.10947437120558234	15.19198657977681	8.913023948225051	2.7905661696798514e-5	1.3899532176672765e-4	2.1913731490335984	15.140008842840905	15.120057271924257	15.151117186878167	15.13781427505275	15.235102755155514	15.25337037878844	15.25228885183405	15.246133075740389
Patient_vs_Control	O95415	BRI3	-0.170377	11.103233948864654	-5.47295	7.121377829170178e-4	0.00186181	-1.39801	11.203173619994548	11.237899045470442	11.13299128624126	11.179625215536973	10.951393291081242	11.031125256670585	11.069821564481698	11.01984231144048
Patient_vs_Control	O95425	SVIL	-0.458753	20.631207386389505	-8.25424	4.756668263411375e-5	2.1178775402091378e-4	1.5983100639616126	20.892565613649435	20.92634022703055	20.778448573758094	20.84498083038329	20.258654453271937	20.43678064301129	20.50761711903785	20.404271630973593
Patient_vs_Control	O95428	PAPLN	-0.371415	10.633097023682076	-4.73398	0.00170885	0.00383364	-2.3577	10.76538893029051	10.814165876127882	10.85959108789778	10.836073145742064	10.683152143531942	10.372312732296365	10.28709334281312	10.446998930756948
Patient_vs_Control	O95429	BAG4	0.0510318	13.377493900088531	2.1238928447659986	0.0683087	0.0950077	-6.24837	13.34796750505192	13.413424908586792	13.29840989454028	13.348109592945478	13.418731281767045	13.387559937737604	13.400602094568631	13.4051
Patient_vs_Control	O95433	AHSA1	0.018882857873570913	16.726625599714286	0.7212191925839424	0.492413	0.5465791481841514	-7.96535	16.700990708334903	16.743471601542915	16.704169811077627	16.72010456215455	16.80665334859091	16.708909146245556	16.691786468569763	16.73691915119805
Patient_vs_Control	O95445	APOM	-0.00128108	27.072089149755097	-0.00679023	0.9947574786604414	0.9963284734653791	-8.24985	27.17473530808754	26.68344546918933	27.359707775534908	27.073030201156712	26.633978556108108	27.27804404220403	27.315529773140817	27.05824207261933
Patient_vs_Control	O95453	PARN	0.0800686	16.5544	5.8728242756084255	4.573494198489138e-4	0.00127904	-0.91014	16.50818734100846	16.513935161733205	16.5191	16.516392912730833	16.621851024083156	16.585726455770452	16.57585079633947	16.594419394786733
Patient_vs_Control	O95456	PSMG1	0.0969611	16.341563747890035	4.285115211775943	0.00302171	0.00620139	-2.97833	16.285475822663837	16.345178220988657	16.25054559641703	16.291133169059002	16.42193111343331	16.37097439513615	16.37543426665365	16.39183739876863
Patient_vs_Control	O95466	FMNL1	-0.444767	11.649884129232678	-17.3159	2.274017638238807e-7	4.841071951725881e-6	7.524224519752803	11.86611590103158	11.813892531054798	11.929970829460796	11.879090493051043	11.456504997879431	11.428039905362873	11.400029401900614	11.42542897412029
Patient_vs_Control	O95467:P48147	GNAS:PREP	-0.0210187	18.61293784801108	-0.876104	0.4078741058307974	0.464198	-7.83637	18.61357768479072	18.675226055191924	18.582746538193035	18.622238457901062	18.644303543419724	18.580198186397404	18.58101142663239	18.60420089156236
Patient_vs_Control	O95470	SGPL1	-0.29159	17.791121714751743	-6.64595	2.0542771870236495e-4	6.657936981645223e-4	-0.025397	17.965962594230103	17.896833730085977	17.953783264952165	17.931087931325713	17.51849162160663	17.69291643300389	17.725852344774545	17.64404579803493
Patient_vs_Control	O95476	CTDNEP1	0.16402302459663964	15.000856529977634	2.9325527565440437	0.020073421210424904	0.032073549601427276	-5.00012	14.9518	14.979207862072284	14.840954616354654	14.903370362461322	14.935363351223554	15.120122496647411	15.190862262971054	15.085124058261789
Patient_vs_Control	O95477	ABCA1	-0.123111	19.870701266079227	-1.78243	0.11460131632226636	0.15029073487521352	-6.74935	19.945293353476497	20.110773065164327	19.759744031698524	19.91321621736636	19.745922846640983	19.79930033249767	19.87590313150946	19.81545715027999
Patient_vs_Control	O95478	NSA2	0.0916841	18.108566165316418	2.708402370396747	0.0280796	0.0430027	-5.34875	18.08170122539542	18.003770312636387	18.103770628257504	18.061654315004397	18.07258989254821	18.190704367467447	18.201915338896043	18.152423242325938
Patient_vs_Control	O95479	H6PD	0.33330064333303966	21.639863161999035	11.528722069913947	4.478344131786575e-6	3.609110903114269e-5	4.226426031070401	21.454547332421956	21.47442463836542	21.484869091884853	21.47901029865782	21.888807177043656	21.779829049847056	21.75094136063206	21.80647634713946
Patient_vs_Control	O95486	SEC24A	0.0016833	17.706066901898602	0.0569841	0.9560309864423635	0.9650177305781225	-8.24804	17.72428491269138	17.70616040341611	17.691331899360435	17.699123785975114	17.62280748753085	17.733811474172878	17.76399264629658	17.70702260574547
Patient_vs_Control	O95487	SEC24B	-0.0027531	19.067436744641512	-0.0944576	0.9271942033136102	0.9417682671575993	-8.24483	19.08772424112147	19.064601671396225	19.05973826024383	19.063188996584454	18.982779979383096	19.093569359617018	19.12189819036391	19.06599325842208
Patient_vs_Control	O95528	SLC2A10	0.11024646570669816	17.65879826125572	5.880009673540757	4.538096635208225e-4	0.00127304	-0.901568	17.607956390825567	17.64222666736896	17.565417216638494	17.59909983877646	17.693801609423872	17.71387601384209	17.732717648909958	17.71529070426034
Patient_vs_Control	O95544	NADK	-0.197471	11.404325250918383	-6.5027	2.3701973544294357e-4	7.50853843038774e-4	-0.183766	11.498528580449614	11.584222574063856	11.431782392187785	11.497709448298686	11.322980808085417	11.286268679563824	11.30469497366805	11.308414551029834
Patient_vs_Control	O95562	SFT2D2	-0.198562	21.501322548673492	-4.60699	0.00200184	0.00436862	-2.53039	21.595058723298663	21.719789973877752	21.495170963720085	21.592393934468433	21.42268071198623	21.37524521340096	21.40404620193354	21.40619466670229
Patient_vs_Control	O95563	MPC2	-0.13695	20.839674967154245	-1.55409	0.1608410424525962	0.20231891334864038	-7.06421	20.957236509281575	21.02746888182449	20.765230089551828	20.882664847122733	20.550859882127806	20.821920423072452	20.936428669732415	20.775590434520673
Patient_vs_Control	O95571	ETHE1	-0.519136	15.700911152476365	-7.32643	1.0729351419551943e-4	3.9972308196718515e-4	0.6947161636485308	16.008373018898812	15.970833288255209	15.918232197368935	15.944478177237974	15.22975433743336	15.50767474525954	15.586033236385449	15.441910218971644
Patient_vs_Control	O95573	ACSL3	-0.193658	14.881076715680654	-3.07034	0.0163713	0.026743436951151358	-4.78654	15.010979324714947	15.073229698763903	14.86792693562072	14.959486154140237	14.635307442675362	14.816052073346857	14.897902734162974	14.787729362020231
Patient_vs_Control	O95602	POLR1A	0.1888413047667079	21.031969554261977	14.841885750342525	7.101079507985392e-7	9.67389600136368e-6	6.268732105348688	20.933487083983945	20.92607789528422	20.95083933971853	20.9398	21.144674142072738	21.122446863039222	21.11246891143294	21.125970910036425
Patient_vs_Control	O95613	PCNT	0.2518155604733643	19.41138363600597	11.453682700638144	4.694305079339091e-6	3.738038788367943e-5	4.174077383154289	19.27491403593184	19.32562152477533	19.25590963036461	19.285458232005375	19.582592914561385	19.515925839252496	19.511993726128942	19.53865318502778
Patient_vs_Control	O95619	YEATS4	0.21781682434690453	14.880711016476699	5.9075	4.405445193639798e-4	0.00124347	-0.868835	14.749599288162866	14.74064504384734	14.815542533768545	14.781423551434225	15.088555176139373	14.963054052723583	14.918435589270011	14.988432896467646
Patient_vs_Control	O95622:O43306	ADCY5:ADCY6	-0.18253	10.857260681479296	-4.38373	0.00265923	0.00555267	-2.83954	10.976466216404392	10.923184419225956	10.952638483062485	10.941813990148908	10.643563698309784	10.809675742933395	10.845516189348968	10.765226712400478
Patient_vs_Control	O95625	ZBTB11	0.2856719430478911	15.601938165766972	6.854719813728399	1.6744554825918987e-4	5.671091806069594e-4	0.2010858397079751	15.467021986603006	15.564333558578683	15.357249203742978	15.447804028047448	15.706469200610313	15.739303900766798	15.784827949209738	15.748495498576814
Patient_vs_Control	O95628	CNOT4	-0.168418	7.297853839073227	-4.67531	0.00183793	0.00406806	-2.4372	7.365105309793354	7.322204641701459	7.448516820104929	7.392424941550195	7.29036	7.199082300975391	7.153660390332098	7.2114748388834915
Patient_vs_Control	O95630	STAMBP	0.00910753	17.732716021747116	0.8849585842395065	0.4033724950717611	0.45979175132906647	-7.82837	17.727926114574977	17.731781062499486	17.725007429428597	17.7279	17.738195465217345	17.73635996066113	17.737128128878012	17.73739559226389
Patient_vs_Control	O95639	CPSF4	-0.0835913	12.297957141158255	-6.81912	1.7332855360281172e-4	5.816383724300234e-4	0.16281931521766246	12.344309423594408	12.332377024490048	12.34339544822431	12.338929256089193	12.23629871791583	12.263800014303568	12.26862478449273	12.255922460155952
Patient_vs_Control	O95671	ASMTL	0.2909147221878534	17.50364102217638	11.16377216566372	5.64606053408055e-6	4.2767151472879845e-5	3.968847897596582	17.347926625326746	17.310383888425843	17.409003859254312	17.365420271322932	17.695872901392292	17.642131186573163	17.61100983508698	17.6474
Patient_vs_Control	O95684:A0A994J5H4	CEP43:NA	0.17148345182972413	13.615402471795718	4.10981	0.00380592	0.00754161	-3.22834	13.54934826199164	13.43731495830515	13.600822399953072	13.53115736327356	13.617262036335749	13.743751313407248	13.745571325391598	13.697992115707732
Patient_vs_Control	O95685	PPP1R3D	0.0202903	14.873998855404194	0.3200440615018853	0.7575764221980436	0.7960474767793889	-8.19233	14.905247397055778	14.895419597949328	14.806613790288685	14.84813400747394	14.700547475776494	14.937881499445258	15.012720381617214	14.88542669362686
Patient_vs_Control	O95707	POP4	-0.072538	12.46152374591602	-3.054	0.01677	0.027321374656725263	-4.81181	12.506302587762113	12.44340534523355	12.541813908374182	12.499649198671223	12.389460702317985	12.445969511096974	12.4422	12.423385143496436
Patient_vs_Control	O95714:Q9BVR0	HERC2:HERC2P3	0.15939128765819177	20.964223315093857	13.03398784878178	1.838664018719411e-6	1.861561153528927e-5	5.2149971746396755	20.889090314849213	20.87788597711306	20.887493506674776	20.883640886422004	21.02400616474815	21.051449435546115	21.05651456117039	21.043705674227148
Patient_vs_Control	O95721	SNAP29	0.3367499021549456	19.47439962208183	11.299412430397682	5.176116542853217e-6	4.008059702642014e-5	4.065465021862524	19.286621916840616	19.310735918578352	19.314978218933597	19.31176262966487	19.728208110863395	19.614488048884667	19.585545210320472	19.64285692256867
Patient_vs_Control	O95747	OXSR1	0.29235325966193315	21.601743732052935	19.549561623115647	9.229707501317328e-8	2.7175533941378683e-6	8.51222	21.448022712730157	21.456224520879392	21.460124815362622	21.457896359915697	21.78117718219495	21.73710819352101	21.7255	21.74791122568624
Patient_vs_Control	O95749:A0A2R8YE82	GGPS1:NA	-0.120205	18.54117770158702	-5.22099	9.516306525031449e-4	0.00236885	-1.71662	18.61455823332609	18.616058785389335	18.578654531692223	18.59584859092359	18.42203252752311	18.497574269420554	18.523	18.48164988084887
Patient_vs_Control	O95757	HSPA4L	-0.60521	15.681714880598946	-49.4575	8.583117397939785e-11	4.1782615493170875e-8	15.709566896346434	15.98338012782119	15.966163030668405	16.001601837579344	15.986134377008865	15.383836618955613	15.38065949250388	15.373473912775944	15.37846964747833
Patient_vs_Control	O95758	PTBP3	-0.849323	10.148734612132305	-19.1247	1.0870251458306954e-7	3.0168973142552454e-6	8.333450430546364	10.603257150289272	10.54405257711919	10.57986239968995	10.56641163580614	9.5933	9.77112	9.808708464798103	9.723172360626736
Patient_vs_Control	O95772	STARD3NL	0.0694285	18.409670504343033	6.450380921972532	2.4987504928626007e-4	7.840943746833997e-4	-0.242217	18.375707383686187	18.365428809524236	18.383173613038306	18.37551518089141	18.441376758303072	18.44696381618138	18.445144374612724	18.44405409850694
Patient_vs_Control	O95777	LSM8	-0.183811	12.112659378440954	-8.95413	2.702234251829478e-5	1.3575992017125917e-4	2.2271529711445375	12.216832840037178	12.191277342138733	12.208350720838446	12.201798434383775	11.967066109551917	12.040275995290916	12.055332973482928	12.02034061180374
Patient_vs_Control	O95782	AP2A1	-0.0839193	19.445882683076306	-4.31536	0.00290514	0.00599078	-2.93562	19.491877282199297	19.52944036706476	19.44696132953933	19.48309041833644	19.38479252572189	19.40304401146597	19.422457600986853	19.405397929295905
Patient_vs_Control	O95793	STAU1	0.051265	20.270762454542457	4.482465711629225	0.00234327	0.00501335	-2.70196	20.24711238409563	20.231931379510044	20.25586948083695	20.24560662617913	20.28807344083142	20.30130453507131	20.30026090772604	20.295940882089116
Patient_vs_Control	O95801	TTC4	0.5187523138872621	20.619772894985154	16.086687530548982	3.9216866899016223e-7	6.627177923963612e-6	6.924282895940065	20.34569491050106	20.305979881479548	20.42032109134376	20.369591068841732	20.9457	20.86692414945809	20.8268	20.87717944318384
Patient_vs_Control	O95810	CAVIN2	-0.818308	17.316751127921396	-25.0759	1.4348582650896029e-8	8.236745091250009e-7	10.526274650966911	17.74474584286681	17.75808226686613	17.68353142040947	17.717261971299067	16.8235	16.92922748690292	16.968893427900934	16.908804791487437
Patient_vs_Control	O95816	BAG2	0.029866443558697497	15.607041617384144	1.9622898847096069	0.0873501	0.11820432192180749	-6.48907	15.59058150958674	15.62422540667147	15.563720104936088	15.589906561224886	15.627680953059162	15.614707521728274	15.622417088925742	15.623093792940796
Patient_vs_Control	O95817	BAG3	-0.0352915	22.1259	-1.4161	0.19649496155667576	0.24138731650182477	-7.24368	22.13360894772056	22.198920982692925	22.09957251406997	22.142045408309563	22.1503	22.08535961048648	22.0872	22.110143952475617
Patient_vs_Control	O95825	CRYZL1	-0.319887	16.218888229597205	-24.9266	1.5005720217221923e-8	8.482549250200631e-7	10.478330517276898	16.383093885871734	16.363014642960824	16.390412242477712	16.3788	16.040652164412357	16.067505221528812	16.06921216398406	16.05840837526144
Patient_vs_Control	O95831	AIFM1	-0.625804	19.189821855594097	-16.2913	3.5720120355359577e-7	6.3307844377387286e-6	7.027226060096934	19.52641791872685	19.44898436498186	19.53576496769002	19.499727236013555	18.77412744916114	18.91908329351913	18.93933164460862	18.875137970051597
Patient_vs_Control	O95832	CLDN1	-0.55119	17.137574466071666	-3.51022	0.00867044	0.015415514825439148	-4.11329	17.515244996175653	17.511686943867588	17.253068713209586	17.372676909243356	16.40857364685658	16.991211030852526	17.1823	16.865867171037124
Patient_vs_Control	O95833	CLIC3	0.0812298	12.044625849327492	1.553405402603583	0.16100165301444844	0.2024860610250607	-7.06512	11.993934029081537	12.14851913489401	11.87847328450362	11.995117396968729	12.125060083986636	12.047990521413896	12.077650630545897	12.090261713225612
Patient_vs_Control	O95834	EML2	-0.20542	17.92011319456477	-3.31842	0.011404506781383843	0.019519254271471602	-4.40485	18.06447445653678	18.032971980581273	17.98503402325581	18.00881208725788	17.63335647776514	17.87490742475346	17.943412585000804	17.817936521367027
Patient_vs_Control	O95848	NUDT14	-0.148536	13.367272371267845	-5.43767	7.412563592599678e-4	0.00192143	-1.44209	13.435511390002617	13.512095868840644	13.381005654865902	13.437548591943788	13.31733758501909	13.273243148431346	13.285985624391346	13.295451106648033
Patient_vs_Control	O95857	TSPAN13	-0.00883901	17.627298469781966	-0.0825624	0.9363375477238323	0.948812	-8.24602	17.705744644502076	17.59991055002937	17.610234416565955	17.610982290237498	17.297370432651782	17.732996232506277	17.839069149165024	17.622080042597734
Patient_vs_Control	O95861	BPNT1	-0.566222	17.162134616979003	-35.1976	1.119706866676755e-9	2.0624619913998108e-7	13.197175377636214	17.450565475001252	17.47002171640619	17.418901328155165	17.4415	16.854763847998132	16.88263993636636	16.89877654523066	16.879914659961074
Patient_vs_Control	O95864	FADS2	0.0439599	10.671643428592523	1.2292513857179916	0.2557610319619896	0.3063594250962022	-7.47062	10.64988147450362	10.746395164402728	10.56086760098569	10.641509670953202	10.68956292772374	10.678571721265053	10.709344824590811	10.697014044315338
Patient_vs_Control	O95865	DDAH2	-0.126531	15.444089777439403	-6.76631	1.824827101263259e-4	6.043032876836426e-4	0.10579361836492573	15.497634385674989	15.53258232683013	15.490886017640433	15.5083	15.42289499067886	15.363020944068394	15.355713839278256	15.381666671937465
Patient_vs_Control	O95870	ABHD16A	-0.0883494	20.196342246496762	-3.75972	0.00611637	0.011390395991126753	-3.73975	20.255220226391348	20.23112780882174	20.239064650653223	20.23665512247037	20.087613007021993	20.1745	20.194628996917583	20.151901224155345
Patient_vs_Control	O95873	C6orf47	0.0980465	17.598973836028286	3.0062579785217656	0.017994892752222113	0.029083870414879098	-4.88576	17.548116028627305	17.463735441411767	17.63021459659855	17.557736285686524	17.65885119735353	17.659084316848833	17.62908476908946	17.644968052610327
Patient_vs_Control	O95881	TXNDC12	-0.213493	10.02333779389831	-6.84022	1.6981459922842565e-4	5.722132919086129e-4	0.1855163093957053	10.121416978060788	10.059278231931668	10.200900362440112	10.138741290406209	9.957090402542777	9.915533982502655	9.879667923314967	9.914073179987314
Patient_vs_Control	O95900	TRUB2	0.0947427	19.430887625612367	8.525952258309951	3.801668296274418e-5	1.775835711155799e-4	1.847486603616991	19.384938216388036	19.393694315660127	19.373216363804104	19.38221622676425	19.471660829537008	19.478660848017405	19.484092504779273	19.47862169994874
Patient_vs_Control	O95905	ECD	0.2955997242510868	20.122479637948068	18.418833487184024	1.4378869917757912e-7	3.6330279633034005e-6	8.027263524568582	19.982062176820413	19.952687697964183	19.98978434967087	19.974184878834627	20.238420675530957	20.284249717043775	20.28890728537848	20.269540322341232
Patient_vs_Control	O95926	SYF2	-0.0665928	15.198489175722848	-1.64347	0.1409922709996502	0.18057325659044302	-6.94336	15.228693153663007	15.123374429048608	15.33325078145937	15.24182395256214	15.182306330139902	15.17801945420871	15.139064735016714	15.16138056968434
Patient_vs_Control	O95965	ITGBL1	1.3639935219769583	16.508566346054284	22.454838871234887	3.280682490146191e-8	1.3847134995981205e-6	9.63645	15.864297943894812	15.734635849555598	15.885014116461535	15.822330430351274	17.027090594224013	17.258710199210434	17.288949233105665	17.187502401630933
Patient_vs_Control	O95967	EFEMP2	-0.158054	22.474887141889567	-8.67994	3.357015796749155e-5	1.6056928758809087e-4	1.9858177471230274	22.544477123539696	22.540552571994155	22.57261344333687	22.55801312875679	22.43791409433059	22.38458815590841	22.365586867541513	22.39535174970851
Patient_vs_Control	O95980	RECK	-0.116058	21.877081688225843	-2.61911	0.032133399186652714	0.0483275	-5.48762	21.906762697900824	21.91108428516927	21.9765	21.94607737741652	21.944863571757686	21.782633877512257	21.73062365233007	21.81808991445962
Patient_vs_Control	O95983	MBD3	0.0640189	15.692589765393034	4.252072137378417	0.00315492	0.00643319	-3.02513	15.665603446659013	15.634172359108977	15.681345347630144	15.661200074299977	15.703288435233215	15.735922179086211	15.735491040140731	15.7237
Patient_vs_Control	O95985	TOP3B	0.21753725636975574	15.579089299060872	4.193461469231116	0.00340718	0.00687272	-3.10851	15.435014053011848	15.496096211745154	15.470848363713907	15.479324055033072	15.842767708544296	15.633653986738826	15.58639941207839	15.68861060162149
Patient_vs_Control	O95989	NUDT3	0.2126485845169892	6.666693241367479	3.9370520824208257	0.00479899	0.00924841	-3.47874	6.523905828489985	6.5584	6.5871110939896305	6.572056526764031	6.933917326696781	6.721577638301232	6.663782051891252	6.772793117614633
Patient_vs_Control	O95999	BCL10	0.10139894065263277	20.441714738412365	1.860616356646753	0.10187975780501063	0.13540698789446443	-6.63734	20.42425946788933	20.44078302566053	20.322668893594987	20.37634968519935	20.344181546063652	20.53169462418149	20.59948068797872	20.494299976730872
Patient_vs_Control	O96000	NDUFB10	-0.257741	16.06218696806198	-7.95904	6.110476166066183e-5	2.562820043918166e-4	1.319935393626782	16.211568874344476	16.204055009815725	16.16511737710332	16.18348926143337	15.842425971768398	15.960363968809547	15.996616040598244	15.933859240622768
Patient_vs_Control	O96005	CLPTM1	0.1683128277378536	21.791910200201375	9.67981	1.5619691990686863e-5	9.016204815493715e-5	2.836959837775863	21.717332615840583	21.69450981315094	21.713339124132577	21.70583359220569	21.834239213062204	21.891765021879095	21.902618861268618	21.875643360071297
Patient_vs_Control	O96006	ZBED1	0.0455615	20.479018950149175	0.5296410054216176	0.6115138480188798	0.6611303106653627	-8.09409	20.39789274994825	20.443695259985383	20.507639665283456	20.47572507091788	20.7596	20.420981723733725	20.325545772207327	20.501111355668073
Patient_vs_Control	O96008	TOMM40	-0.178696	17.72236520243228	-14.7532	7.420919948657301e-7	9.924461074193335e-6	6.220017996741992	17.809912070079413	17.795805982531057	17.827523155074854	17.813612124108595	17.641471947171684	17.63298663398824	17.625157752075502	17.63245195442888
Patient_vs_Control	O96011	PEX11B	-0.221815	15.601415954610298	-8.12314	5.3114344233720596e-5	2.3058319952118177e-4	1.4756850338332743	15.71767515789777	15.777587266051928	15.648854236632875	15.705177509487475	15.464811912065098	15.487740000699947	15.5167	15.492818203444283
Patient_vs_Control	O96013:Q9P286	PAK4:PAK5	0.0752589	19.609399713164983	7.002029598976512	1.4535942392063635e-4	5.071259022783023e-4	0.35788519826554754	19.574085012348064	19.57161499289099	19.570329273470215	19.571051699212138	19.636823843503674	19.650339191410023	19.653920079476528	19.647033613008244
Patient_vs_Control	O96019:O94805	ACTL6A:ACTL6B	0.0638679	17.623299187628906	2.8374657594034165	0.023132179640712562	0.036340614401136645	-5.14792	17.577427558301277	17.599808094239847	17.5932	17.595064224304373	17.716441018713297	17.634110605803347	17.61491134222076	17.65546955023613
Patient_vs_Control	O96028	NSD2	0.34813889399227804	17.519552385684914	5.48405	7.03246564604248e-4	0.00184451	-1.38419	17.309534096841556	17.26518032488079	17.443661952067472	17.363555380965302	17.854762730084627	17.655351669583006	17.573718423063198	17.69065450799337
Patient_vs_Control	O96033	MOCS2	0.0941805	14.348054775336264	4.165007056912646	0.00353748	0.00708466	-3.14917	14.303801461550243	14.243582323812833	14.35161025680926	14.30486402735356	14.384469717100693	14.408283848542816	14.394680260203224	14.393146307317489
Patient_vs_Control	P00156	MT-CYB	0.047572687640307976	17.661427690145473	1.4011210050691538	0.2007590845398933	0.2460181369069513	-7.26259	17.652688891831886	17.69747929316447	17.572512539046173	17.62788466125874	17.616923191595365	17.69706874171767	17.739489116087086	17.68737508646238
Patient_vs_Control	P00167	CYB5A	-0.27551	15.590911450048113	-6.18082	3.296788662454524e-4	9.813758994391738e-4	-0.548708	15.756556392687092	15.666874565628268	15.76621703256799	15.72501685102491	15.332114198197845	15.50255384877576	15.526848424402504	15.451110287100532
Patient_vs_Control	P00338:P07864	LDHA:LDHC	0.1289097117803948	19.925747149053826	2.081188106310511	0.0729026	0.10070659432598993	-6.3125	19.819828283470702	19.846826653145794	19.902909286168917	19.875604949869103	20.17356085788238	19.93364919221709	19.864079707080887	19.989518262595745
Patient_vs_Control	P00367:P49448	GLUD1:GLUD2	-0.184889	20.089532339090756	-9.3246	2.0333346670501435e-5	1.0922569694714423e-4	2.543541115619213	20.19300927928804	20.193111576576527	20.16422644587762	20.177559473426975	19.94806714986958	20.010978331601752	20.031781226139863	19.997525229945683
Patient_vs_Control	P00387:A0A087WZB1	CYB5R3:NA	-0.00815041	20.615305782341665	-0.312498	0.7630835892905312	0.8008100559067921	-8.19499	20.633772638997215	20.64580746198589	20.58531971600549	20.612624142240367	20.54690321896304	20.627460133697365	20.658340943409648	20.61221800343429
Patient_vs_Control	P00390	GSR	-0.238549	14.050035318080047	-3.62542	0.0073721	0.013424205120268214	-3.93995	14.124140010167416	14.194671468386648	14.176962682797331	14.181464627388875	14.1292	13.862624028068806	13.799773252571873	13.931457051600828
Patient_vs_Control	P00395	MT-CO1	-0.15804	10.230068061946037	-2.05964	0.0753344	0.10363442115646623	-6.34472	10.274106206916477	10.48924347454101	10.167917276993569	10.30508579124198	10.299580076885311	10.072789139548734	10.074610657884785	10.15721187155643
Patient_vs_Control	P00403	MT-CO2	0.037042177690210565	13.738427936058624	0.5571285026698429	0.593501	0.6435613534939092	-8.07782	13.674253189567946	13.743674443795811	13.729351789485168	13.732347966005154	13.957563347744092	13.688378369422022	13.624267172978117	13.757587209470689
Patient_vs_Control	P00441	SOD1	0.0797818	21.484717856840245	0.9766081319735386	0.358892	0.4145904642676791	-7.7418	21.39050805406765	21.534995343089182	21.39934778163559	21.454456673371812	21.761317809448272	21.433194991227342	21.3764	21.527536841050523
Patient_vs_Control	P00491	PNP	0.0519925	24.109646130460114	1.468718324107854	0.18213964162017804	0.22561215659211878	-7.17633	24.094706943144168	24.16220115834865	24.004101224699028	24.07359021233072	24.084353852483805	24.13886168664029	24.18091179045967	24.138442175574585
Patient_vs_Control	P00492	HPRT1	0.20986459400932134	15.608988860708308	4.2804108562012955	0.0030403	0.00623101	-2.98498	15.470997158248554	15.505048587041967	15.525759306911873	15.5144	15.859712571014471	15.666842331528086	15.61531479299804	15.713814935311282
Patient_vs_Control	P00505	GOT2	-0.177481	19.819633826671257	-4.19935	0.00338089	0.00682723	-3.10012	19.936769235698513	19.90281711768739	19.89404583824539	19.89986546233466	19.605823295393897	19.77207658058427	19.814853493080573	19.730819590345355
Patient_vs_Control	P00519	ABL1	-0.0886482	18.53684071692552	-7.20744	1.1978729489433368e-4	4.32890788745858e-4	0.5724916577418853	18.585172823278377	18.568505691302057	18.590024507225433	18.58095625599876	18.47524307876376	18.500215462363116	18.50251781895828	18.49209009751439
Patient_vs_Control	P00533	EGFR	-0.0327372	22.086246523777614	-1.64338	0.14101171533240525	0.18057325659044302	-6.94349	22.092709890750537	22.081296217673245	22.12892715576408	22.10752728065059	22.11425236589791	22.05920483272492	22.03696584895891	22.06908859780071
Patient_vs_Control	P00558	PGK1	-0.0553454	18.37502846728016	-2.76928	0.0256219	0.039722166781056494	-5.25401	18.395536279943663	18.445440504759404	18.368434616601103	18.4014	18.377590474056376	18.33039960224069	18.332610099544308	18.34882291815924
Patient_vs_Control	P00568	AK1	-0.0160745	17.536890873647963	-0.570161	0.5850634296195278	0.6356395124359161	-8.06985	17.52844429322722	17.585869428922724	17.518683261199474	17.546715486529735	17.600251270211995	17.498956589417208	17.485988634690372	17.530218024984983
Patient_vs_Control	P00736	C1R	0.18589112300601585	13.575200792769992	4.4268995903952275	0.00251572	0.00530764	-2.77922	13.487303740464348	13.366244435014554	13.585116687889238	13.490356061699792	13.649594164152385	13.693734313353277	13.66515438174499	13.664102557841352
Patient_vs_Control	P00749	PLAU	-0.243216	27.244717213095175	-3.15157	0.0145316	0.0241159	-4.66108	27.414397172180504	27.432389681771795	27.27290296030082	27.345611926081247	26.908950816839827	27.180846270997208	27.27700981154573	27.125629065044272
Patient_vs_Control	P00750	PLAT	-0.193433	28.475365551801843	-0.914916	0.38840875648004614	0.4446786986229691	-7.80082	28.712858035356383	28.66384709869547	28.39169882550471	28.51992343121585	27.75475356767419	28.5639	28.813497302968983	28.38246530979017
Patient_vs_Control	P00813	ADA	-1.05946	12.787338481066774	-12.0565	3.240290627936291e-6	2.820095609677091e-5	4.585986311884602	13.370272926775147	13.16966599907403	13.415757423992057	13.312573062419066	12.027644915944975	12.356531846629768	12.393590498372046	12.2527
Patient_vs_Control	P00846	MT-ATP6	0.37738212094761536	21.886326742442613	4.826797669622822	0.00152446	0.00349399	-2.23292	21.751005808482475	21.638904320974248	21.71495432124394	21.68567827717456	21.841486659560676	22.160092731859336	22.22530451730156	22.073187302944103
Patient_vs_Control	P00966	ASS1	-0.717311	9.791423993644898	-6.98482	1.477642289690339e-4	5.140421152605458e-4	0.33969216887130393	10.201860513675792	9.924248495377906	10.321618215810252	10.152590535332928	9.211599801720627	9.542123664004064	9.552275065803371	9.425075657434238
Patient_vs_Control	P01033	TIMP1	0.0711011	18.388562948430742	1.6326107417413775	0.14327787518549784	0.18319296876282704	-6.95823	18.382303041499743	18.34824957946126	18.337343019967317	18.344153938786256	18.295066674331295	18.466442124249525	18.510873695679415	18.42407151347113
Patient_vs_Control	P01034	CST3	-0.0171822	14.990373237328624	-0.712291	0.4976157144317548	0.5520495209329495	-7.97212	15.008129048489655	15.043216709794924	14.952142117243117	14.992369394301466	14.939939377569692	14.987762369777538	15.016054918893198	14.983371962559405
Patient_vs_Control	P01111	NRAS	-0.0446452	17.54773062812675	-2.30148	0.0520936	0.0747618	-5.9785	17.562371682048294	17.608831697182353	17.539769838468533	17.5692	17.55804852837922	17.50834758913513	17.50850188581417	17.5267
Patient_vs_Control	P01112	HRAS	0.11393122642798659	16.282698025920936	2.6379568459947675	0.031230274507281837	0.0471875	-5.45833	16.19704175636767	16.262592983503446	16.211576410212018	16.231718500744638	16.465035664992648	16.29308943768764	16.259696476955902	16.340832976903517
Patient_vs_Control	P01116	KRAS	0.0643206	18.055531832100172	2.2117936110091385	0.0597359	0.0843371	-6.11538	18.03984379979329	18.05225848719219	17.985632356336264	18.01575152454458	18.014108494367754	18.106483968908844	18.141401380368855	18.08877464528959
Patient_vs_Control	P01130:Q14114	LDLR:LRP8	-0.0379008	18.45011194653007	-2.12638	0.0680506	0.0946667	-6.24463	18.459674334439097	18.45846671637188	18.48519361507638	18.472914799355028	18.472911052183697	18.41951966781145	18.401465196276163	18.43075019072685
Patient_vs_Control	P01137	TGFB1	0.0763206	16.500669798431183	4.580171550903766	0.00207051	0.00448897	-2.56716	16.47120723441687	16.469328109866428	16.450311755148515	16.45919090800052	16.50024644201792	16.550092007480043	16.565875800929927	16.539106129589246
Patient_vs_Control	P01344	IGF2	0.9124299201164945	18.368466805567195	8.879870694783166	2.8641765242557674e-5	1.4170537540867948e-4	2.1624118499649025	17.84187807389292	17.990371862437925	17.888795161842708	17.92796228386223	19.13259390743681	18.71239459053214	18.626619382892272	18.827119181640548
Patient_vs_Control	P01889	HLA-B	0.5277892393620451	15.610425506813831	18.914253332291644	1.1803298458776837e-7	3.204003172713326e-6	8.243379800784698	15.364567369886034	15.339063837386956	15.341037306514824	15.341455034743412	15.795001420194758	15.901105121904084	15.927038584038456	15.87413537984212
Patient_vs_Control	P02452	COL1A1	-0.484508	21.59044028006212	-3.75272	0.0061758	0.011477651646371375	-3.75014	21.920319521232855	21.71210271449965	21.88327254106661	21.81508147226027	20.965538729757316	21.491703511465275	21.591169404833497	21.34433434538148
Patient_vs_Control	P02458	COL2A1	-0.635406	21.913065280125704	-3.50871	0.00868899	0.015444744853563609	-4.11557	22.356188346881947	22.19283699568534	22.17974482862913	22.194302880569857	21.043356461979563	21.779394830946845	21.96412994335128	21.59456795296166
Patient_vs_Control	P02461	COL3A1	-0.307505	18.32847727685319	-2.54942	0.035712989001104034	0.053057221909676835	-5.59587	18.553934299047672	18.269011243377975	18.628583758109382	18.477390774569887	17.865271594769048	18.310353884320673	18.35571408686044	18.16755857377044
Patient_vs_Control	P02462	COL4A1	-0.795481	23.014225752050756	-5.58353	6.287486971358737e-4	0.00167132	-1.26094	23.510658908550905	23.344784098167633	23.406029188864856	23.38639184176391	22.183308849282263	22.76722909539592	22.900851885270914	22.61455214910964
Patient_vs_Control	P02511	CRYAB	0.7902512258890511	22.80486099146748	5.064033336226628	0.00114502	0.00275053	-1.91957	22.30973580142319	22.2961	22.58226634037011	22.450834979061906	23.64471942473162	23.07610165106069	22.88354712829799	23.195578213557727
Patient_vs_Control	P02538:P04259:P48668:O95678:P05787	KRT6A:KRT6B:KRT6C:KRT75:KRT8	-2.75425	21.905549493706967	-26.9498	8.35385853469527e-9	5.865372598110083e-7	11.103001218248163	23.28504637348468	22.994170642663363	23.545437370390665	23.30603547659004	20.5272	20.577610111896877	20.49057145611583	20.518326775436375
Patient_vs_Control	P02545	LMNA	0.026477367173246336	18.759486132048576	1.9375984277266578	0.0906827	0.12217062767480193	-6.52533	18.74143651878638	18.765475561685637	18.731916999149036	18.746160714226768	18.793329569503808	18.762843213556113	18.761348376446534	18.77337810303434
Patient_vs_Control	P02649	APOE	-0.222635	19.0401	-2.76723	0.025700682404532972	0.0398358	-5.25719	19.1271	18.96196939679042	19.341596353446043	19.17489777983121	19.042114438243917	18.9243	18.826563805847833	18.92200338334239
Patient_vs_Control	P02686	MBP	-0.416284	19.173058392224448	-11.6549	4.139837362501142e-6	3.397544017495544e-5	4.3137786401827185	19.36422126014464	19.45818690819359	19.322261642885596	19.38013151846485	19.037343863842818	18.928592490958245	18.926187596382043	18.96754185692379
Patient_vs_Control	P02751	FN1	-0.840427	18.811603957712173	-7.52041	8.99245563070834e-5	3.4614080661798783e-4	0.8907485967805862	19.309121389844947	19.181086634947665	19.225434299810665	19.211627824839915	18.05203260299428	18.509164022156835	18.614422583645673	18.38994230345739
Patient_vs_Control	P02787	TF	0.0380809	18.690194801840715	0.21932375589044012	0.8321869889759049	0.859738	-8.22275	18.553	18.83023202592009	18.60620182639496	18.695204782082783	19.225404976156927	18.516246719148594	18.380983533829447	18.714305784621125
Patient_vs_Control	P02790	HPX	0.6619962966415152	12.056952869112981	9.565312085328879	1.698992207084424e-5	9.609376754536275e-5	2.7434046791217153	11.683240587105963	11.664114534046432	11.81184171188945	11.744622050127054	12.578341780598826	12.337147012941251	12.250713462322166	12.385601813872707
Patient_vs_Control	P02792	FTL	-0.33074	16.84320530887596	-2.50349	0.0382931	0.056591	-5.66708	16.9183	16.99574129085876	17.08206565843236	17.03816914450292	17.07633773318655	16.551780405983106	16.40622299923895	16.677000892020743
Patient_vs_Control	P02794	FTH1	-0.427632	14.928353328336438	-3.41108	0.00998391	0.0173867	-4.26356	15.06391736092771	15.031804298504582	15.29683269476202	15.176123328449744	15.063238345540032	14.62099996395142	14.463574600160682	14.710336034395318
Patient_vs_Control	P03897	MT-ND3	-0.34346	14.211681439240207	-4.91292	0.00137274	0.00320179	-2.11825	14.424098081701192	14.465260705948303	14.280573972903818	14.36371218593854	13.857862121657686	14.08470082234902	14.174250245208071	14.042993378215032
Patient_vs_Control	P03915	MT-ND5	-0.161426	15.2477	-2.6019	0.0329818	0.0494118	-5.51438	15.310446355148024	15.181352864065143	15.475390515511611	15.346339248702115	15.250780251431198	15.164847749118922	15.090468276974065	15.161727039730524
Patient_vs_Control	P03928	MT-ATP8	-0.105824	22.228968042112673	-0.984333	0.3553183150593593	0.4106575398169423	-7.7342	22.20837412095167	22.275961241491046	22.337580188477883	22.30560420262119	22.50047581717757	22.072669059057475	21.955544441924168	22.175535265200388
Patient_vs_Control	P03956	MMP1	0.3256306211029454	17.339678777043048	4.286174366654231	0.00301755	0.00619458	-2.97683	17.12659039102699	17.145409946879646	17.240073670924314	17.195379857135343	17.72525345918707	17.436136234557857	17.3474	17.501177477587763
Patient_vs_Control	P04040	CAT	0.24793568369647545	21.384086911537057	3.2618569038017684	0.012376155859671568	0.020957448984542448	-4.49148	21.208399137843696	21.321009328090344	21.239693281270014	21.271374531551213	21.73423781802208	21.42497911516449	21.363034136059163	21.509967944295457
Patient_vs_Control	P04049	RAF1	0.0936156	13.84048303740295	2.752600143662792	0.0262722	0.040618176893659576	-5.27997	13.775833499067575	13.747361947577629	13.8483	13.803184527918567	13.967473377207927	13.869322637743975	13.826775575579738	13.885591826056595
Patient_vs_Control	P04062	GBA1	-0.468273	15.332597109377089	-26.293	1.0054190957750102e-8	6.674154761226476e-7	10.905993910045407	15.564440716426326	15.608150935998186	15.530345874998703	15.563996314956524	15.107247081529293	15.088629536003587	15.098064056287848	15.099902358816236
Patient_vs_Control	P04066	FUCA1	-0.411664	18.99074355573383	-22.672	3.052790058400367e-8	1.3268733932404452e-6	9.71427	19.198025947418717	19.15376786231065	19.234813854199196	19.199695391531773	18.779886055570255	18.79376752216438	18.782574383148685	18.78341742952699
Patient_vs_Control	P04075	ALDOA	0.11082885467605408	22.124556531552468	3.145285662528566	0.014665946361973143	0.024327707226811855	-4.67078	22.049584639435043	22.132310492587937	22.02463022607485	22.070043058759943	22.264214193353236	22.14218181737944	22.131386682865283	22.182101141964004
Patient_vs_Control	P04080	CSTB	-0.263271	13.739294109509425	-15.3164	5.632607015274381e-7	8.342656475767451e-6	6.524747894377551	13.878555673350608	13.843003587052657	13.891305299406074	13.870853563032147	13.574914829303436	13.622917150532787	13.6261	13.60671261162479
Patient_vs_Control	P04083	ANXA1	0.21551109642496158	20.895865751776963	4.750908489577632	0.00167348	0.00376571	-2.33485	20.757463084801568	20.79661856662444	20.801274881845337	20.797084280986574	21.138531459039413	20.958772637832837	20.913392345527978	21.003788757557547
Patient_vs_Control	P04114	APOB	0.7200482992435795	19.90589632832803	15.97636064402852	4.126193543596138e-7	6.8320782891925176e-6	6.868229947869493	19.52117816810963	19.486498197156088	19.617173753556074	19.558638596003163	20.376746476292553	20.240300841512916	20.182900048394757	20.263734545599064
Patient_vs_Control	P04150	NR3C1	0.0405202	14.098661949263095	0.9913378411186087	0.3521011974247076	0.40745530009432884	-7.72726	14.067575212947542	13.981484981823312	14.174623492430088	14.089923716640383	14.169782556522629	14.118946243365771	14.07147973867296	14.115479651702078
Patient_vs_Control	P04156	PRNP	-0.0899517	18.740979794276974	-1.72621	0.12466520938109042	0.16183206380457285	-6.82868	18.803060663156096	18.903180788911857	18.66682881116527	18.77075226088095	18.616799209376712	18.70166573041487	18.76536610564088	18.70018478466916
Patient_vs_Control	P04179	SOD2	-0.94978	17.177185550191535	-8.41159	4.174670350465995e-5	1.9028366353996692e-4	1.7434124947976848	17.715101851240348	17.42986598762065	17.812603558679786	17.650729890492183	16.431407934088828	16.827036482488563	16.855960940008273	16.694777756913656
Patient_vs_Control	P04181	OAT	-0.102876	22.503974799848166	-1.91973	0.0931705	0.12517590734354453	-6.55147	22.591283730541537	22.507208059575365	22.575053133896187	22.54810543738545	22.29585568289735	22.511103917488875	22.55218766592679	22.451000771073776
Patient_vs_Control	P04183	TK1	0.3306527675166393	27.840253808796007	4.793248028703107	0.00158846	0.00361564	-2.27788	27.666434709479297	27.48987612004396	27.850320805271203	27.69307806535629	28.049	28.02291274194136	27.951379383270137	27.99905928529312
Patient_vs_Control	P04216	THY1	0.6072957282410716	10.89691988141861	5.638769902296111	5.911835476916672e-4	0.00158999	-1.1931	10.556790859350189	10.348972265266164	10.842105243674528	10.625219700901416	11.369310444331273	11.187584928701792	11.053524353606688	11.191851255516829
Patient_vs_Control	P04264	KRT1	0.4028690373385757	27.780185713445974	2.7607170404816066	0.025953605900773242	0.0401681	-5.26734	27.48359090044961	27.770164703650615	27.4684	27.59282559576063	28.39523489188464	27.81616239867388	27.72716158986637	27.987922048036133
Patient_vs_Control	P04279:Q02383	SEMG1:SEMG2	0.43633990921932764	20.734635475533363	5.931047316285547	4.295228675418599e-4	0.00121612	-0.840876	20.47807295727667	20.671607684880925	20.40054987437413	20.515631567163076	21.117182778777764	20.873678086512157	20.862282561122154	20.958078294160035
Patient_vs_Control	P04350	TUBB4A	-0.219304	12.976132420761791	-5.13475	0.001053	0.00256386	-1.8277	13.062136166259329	13.03169220133318	13.151530129812814	13.097778746829738	12.972524063950653	12.84150652876862	12.787407379999618	12.864484149140374
Patient_vs_Control	P04406:O14556	GAPDH:GAPDHS	0.24973625023571344	21.877514554320033	5.958819792030996	4.1691448325601095e-4	0.00118548	-0.807993	21.72538402916707	21.79755439989602	21.7301	21.757508546150422	22.1212	21.956557672628733	21.92793599344807	22.003840110427344
Patient_vs_Control	P04424	ASL	0.3883949731541776	22.479411036395533	31.365256618317563	2.668847075237359e-9	3.055001635324263e-7	12.302707807892855	22.280618859862557	22.29425180089419	22.2801	22.285910155855735	22.693585896209555	22.66565198789177	22.66129055506747	22.67390565272169
Patient_vs_Control	P04439	HLA-A	-2.07624	17.094183112077623	-18.6091	1.332121954694732e-7	3.458533111129119e-6	8.11095	18.124793057616664	17.823904151194505	18.42005680349143	18.160449624545215	16.099061776293738	16.094383030923883	15.98559019702516	16.045226255530398
Patient_vs_Control	P04626	ERBB2	-0.280339	17.499711224136632	-26.8676	8.547651038596844e-9	5.905021338514806e-7	11.07864547157899	17.638579255408587	17.643539549030905	17.63741745226789	17.639985980767733	17.365164649315552	17.35711389492768	17.35622445131247	17.359664560062242
Patient_vs_Control	P04632:Q96L46	CAPNS1:CAPNS2	0.10652630042371314	14.568257522541424	3.598334892273556	0.00765741	0.013867662194350245	-3.98057	14.49572164463796	14.520643839899698	14.522999182432804	14.52061282234781	14.706350614282822	14.593269705345705	14.564825916989424	14.621636454395173
Patient_vs_Control	P04731:P13640:P80294:P80297:P02795	MT1A:MT1G:MT1H:MT1X:MT2A	0.4829949094322288	10.272185113369183	9.490488683093329	1.7958087933735858e-5	1.001756746311224e-4	2.6817451926280196	10.002102266874052	9.966653930837571	10.108921127117531	10.04507330978312	10.641822510632458	10.483279856220468	10.418311154867157	10.511316750621106
Patient_vs_Control	P04792	HSPB1	0.016656907477958782	16.711820161076506	0.5769901212379422	0.5806695899311322	0.6315235844023126	-8.0656	16.685431987845966	16.69262354702614	16.725803919325358	16.71010737515265	16.800157200780227	16.69624228402163	16.664504226536557	16.719690747923515
Patient_vs_Control	P04818	TYMS	0.5280113890379425	18.271250189313943	6.9608168301806845	1.51192399917014e-4	5.2297816399528e-4	0.31426421334752064	17.958943841512014	17.952718785080886	18.090249406360098	18.02706594622688	18.75005414799744	18.475361374670964	18.382468838030725	18.533139174632534
Patient_vs_Control	P04843	RPN1	0.0458069	20.221994928088467	1.192324478221255	0.26911472415731114	0.32067162464045135	-7.51299	20.174149925359952	20.18687008792839	20.22735085539379	20.207995087001315	20.3553	20.211439514532948	20.168484487897175	20.24436373082307
Patient_vs_Control	P04844	RPN2	0.041597	18.797489978295374	2.087141981440582	0.0722443	0.0999106	-6.30358	18.778033850865462	18.824018944996983	18.732401516180865	18.772311580812335	18.810851155494095	18.81267808651231	18.829672003116382	18.819952688384564
Patient_vs_Control	P04899	GNAI2	-0.0757534	17.994527262548225	-1.99615	0.0829725	0.11282404600321419	-6.4391	18.049774117587745	18.09829600779818	17.960138475442985	18.021407283318325	17.87792090021702	17.970840341110563	18.0188	17.959033662935777
Patient_vs_Control	P04920	SLC4A2	-0.102165	18.532588878669074	-2.36825	0.047049	0.0680301	-5.87598	18.56832575297961	18.49136095943508	18.67876255024438	18.59623638781096	18.55215243565277	18.474385180291847	18.42128166490721	18.478206098030732
Patient_vs_Control	P05023:P50993:P13637:Q13733:A0A2R8YEY8	ATP1A1:ATP1A2:ATP1A3:ATP1A4:NA	0.0775284	19.81176661673023	2.7641523537589934	0.025819973715123463	0.0399903	-5.26199	19.75943966529384	19.8295	19.73053817456067	19.77256960810772	19.908546615950986	19.822315317974073	19.818809858645437	19.85245147938924
Patient_vs_Control	P05026	ATP1B1	0.34370421377916927	18.776329899060443	7.6003701513189865	8.369834397697853e-5	3.285371451419452e-4	0.9704218502048203	18.573864521318463	18.62151725225584	18.609801258422205	18.61272813668694	19.082669562964043	18.902026639855936	18.859383260819957	18.948648560160173
Patient_vs_Control	P05091:F8VP50	ALDH2:NA	-0.263837	14.476055110812663	-6.81614	1.7383139067652734e-4	5.830577927055594e-4	0.15960926197162273	14.633266659474916	14.570679114262138	14.624851080633915	14.60309747513227	14.23376504618372	14.385957551671533	14.413886351932918	14.342937607209889
Patient_vs_Control	P05106:H3BM21	ITGB3:NA	-1.10888	20.699928443449636	-93.152	7.118548166819616e-13	1.7326546238038946e-9	19.53181991559984	21.25770449657357	21.263278645522902	21.243925094800584	21.25257155579609	20.13049303418361	20.14880496357761	20.156836413450048	20.145813343692684
Patient_vs_Control	P05114	HMGN1	0.3026937699262273	13.225248111683756	6.742515548436295	1.8678248628729196e-4	6.154718929917897e-4	0.0799922	13.045452546601922	13.04607107451458	13.118863536913311	13.085217748852749	13.502972100021749	13.340637166061915	13.287272288872057	13.375498431631764
Patient_vs_Control	P05121	SERPINE1	-0.0779885	27.223620017938952	-1.20578	0.26418430363201995	0.3153111776922212	-7.49766	27.288202841931255	27.39614066958362	27.12274617256993	27.243367447690485	27.06747841754514	27.199739568635625	27.281871028185087	27.189413997370465
Patient_vs_Control	P05141	SLC25A5	-0.265289	20.40757531895266	-7.58829	8.4607564937934e-5	3.3004904157040615e-4	0.9584236766445482	20.56206432682506	20.560506445849455	20.506687298585707	20.5316	20.17792556502012	20.302713544401986	20.34334967800276	20.27573501014478
Patient_vs_Control	P05161	ISG15	-0.551367	15.89427860030176	-27.623	6.940425645899795e-9	5.171325312893909e-7	11.299534274878738	16.179898710164238	16.137783558401274	16.192655346467667	16.169511739751012	15.5758	15.63780759088148	15.643265294430629	15.617509606764074
Patient_vs_Control	P05165	PCCA	-0.314269	15.360021571019349	-8.21303	4.9237492579008394e-5	2.1737132455376015e-4	1.5599324118760354	15.54057413523014	15.462072166817132	15.551619172549184	15.514359668557804	15.10135669405713	15.244871263012254	15.26426303744478	15.201056430486368
Patient_vs_Control	P05166	PCCB	-0.220508	16.496453198383197	-7.47509	9.368185214399511e-5	3.560983260569767e-4	0.8453023492786116	16.610440738275415	16.52795007887523	16.676327513662983	16.612109592468602	16.372253062934963	16.404005399507508	16.385083713349438	16.383455487991434
Patient_vs_Control	P05186	ALPL	1.0109626542680523	5.48035	14.20732803260828	9.788462628460527e-7	1.1895483986451055e-5	5.913642821489306	5.017128263935179	4.851480483861751	5.059043358777682	4.971828654976008	5.803387731056446	6.065404202481552	6.092850289120488	5.981689155964338
Patient_vs_Control	P05198	EIF2S1	0.15712505282420608	18.981857513597593	7.3545391621256275	1.0455941308069878e-4	3.9093335090387225e-4	0.7233640424821335	18.892808771300015	18.940536072557705	18.87633886658762	18.90349623829662	19.10548110426615	19.039623017861626	19.034895691018225	19.06168034689277
Patient_vs_Control	P05204	HMGN2	0.43057793892464247	16.8614	3.1346695220188745	0.014895658902579895	0.024641617876447305	-4.68715	16.55686790729367	16.559532146407847	16.786377755539004	16.681487859452172	17.47286620553932	16.96378640513945	16.796693245277865	17.073231568434664
Patient_vs_Control	P05230	FGF1	0.9093198095232324	18.43381416764293	15.087072116394099	6.294492203040467e-7	9.018239560198265e-6	6.402004727726421	18.01693317844832	17.890931630642743	18.03416328848103	17.97458895395317	18.72465966835357	18.95610359399525	18.987589397758413	18.885543629510952
Patient_vs_Control	P05362	ICAM1	-0.9188	16.344626707256918	-5.12055	0.0010708	0.00259853	-1.84609	16.919414567270625	16.931135778315074	16.608618423554912	16.756937254383452	15.372184554251946	16.028812412330485	16.249737427575738	15.89017324037311
Patient_vs_Control	P05387	RPLP2	-0.0942169	-2.0226	-1.12762	0.29390203051551833	0.3474858527889111	-7.58508	-1.92383	-2.10753	-1.88982	-1.98078	-2.29333	-1.97542	-1.93596	-2.07411
Patient_vs_Control	P05388:Q8NHW5	RPLP0:RPLP0P6	0.036803589065467435	15.845005504782934	1.558487085745044	0.15980693023584697	0.20122610873980937	-7.05834	15.831672783208251	15.880373884050558	15.773860566020463	15.820507607721533	15.839325328971066	15.86206310416831	15.886927597503671	15.865313166619623
Patient_vs_Control	P05412	JUN	-0.244505	10.685192881211119	-2.04097	0.0775062	0.10626184712518938	-6.37257	10.798218065693383	10.47724977886726	11.116353672107971	10.837959154579169	10.614218911405628	10.602279812570352	10.483933333117356	10.551330321347834
Patient_vs_Control	P05423	POLR3D	-0.0183571	14.101916499684943	-0.810281	0.4424679628943228	0.49836511878055606	-7.89376	14.11824089964374	14.057988762346804	14.154875139845943	14.113275493735497	14.062919391515797	14.111313333377238	14.1058	14.090907413471523
Patient_vs_Control	P05455	SSB	0.2768125572504516	20.525878295791674	7.997590931898923	5.91134758373806e-5	2.506658539863839e-4	1.3567523823958645	20.3659	20.36754558019317	20.420519461665577	20.395969410695844	20.760280495704535	20.636765859346323	20.596597837555763	20.663494105060973
Patient_vs_Control	P05496:Q06055:P48201	ATP5MC1:ATP5MC2:ATP5MC3	-0.586144	18.188802579384774	-13.5472	1.3868557900550908e-6	1.529731265707292e-5	5.527692156059707	18.4877	18.595179383284776	18.374079494839084	18.470574647901746	17.86655817511174	17.88595630705104	17.930681582037874	17.89972560890604
Patient_vs_Control	P05556	ITGB1	0.18335748072752267	21.499505997612307	5.288098008457302	8.801729948432997e-4	0.00221622	-1.6309	21.40819760699165	21.50125538590723	21.32195461861513	21.399901417480184	21.586558098087437	21.57687392206666	21.606846644652272	21.594460287097903
Patient_vs_Control	P05783:Q92764	KRT18:KRT35	-1.08098	20.44208837374677	-17.3445	2.24640283073219e-7	4.796267096493115e-6	7.5376526938958825	21.02063299079264	20.882868370759883	21.04792166689246	20.97888368922508	19.73693003978638	19.971447231885872	19.999754681065568	19.89826831956629
Patient_vs_Control	P05976:P08590	MYL1:MYL3	-0.0432692	10.37189327991355	-3.55788	0.00810576	0.014556185032117277	-4.0414	10.389144394658723	10.401452531136504	10.389263742289298	10.3943	10.369340068832203	10.342778779650947	10.338398224937734	10.350517701138592
Patient_vs_Control	P06132	UROD	0.28756935530672223	16.724120298640027	20.875567841926525	5.657791153046334e-8	1.9547518737782498e-6	9.0455	16.576128399756378	16.602376721174036	16.563014374178167	16.57982298883808	16.885756689503705	16.85843351467769	16.858770288184402	16.86865941280776
Patient_vs_Control	P06280	GLA	-0.132018	18.958986186336737	-4.7223	0.00173373	0.00387358	-2.37348	19.03973048064312	19.05960289593666	18.983201564713607	19.017446019607256	18.826872123771505	18.908395173268183	18.94238851606791	18.89425271668565
Patient_vs_Control	P06396	GSN	-0.436046	17.15376563699358	-14.4444	8.668934161566584e-7	1.1002555202050157e-5	6.048070613925031	17.389960812325064	17.393252820142546	17.339689740741377	17.3643	16.854899398081656	16.95812537175046	16.99337276309226	16.936572043917465
Patient_vs_Control	P06400	RB1	0.16778354757675018	20.637192946003847	7.98234	5.9892249647618904e-5	2.5251793135397236e-4	1.342207744086398	20.54325644343408	20.526728497558793	20.58452323789284	20.558696509976183	20.766242735947756	20.71104797242186	20.68693746495984	20.72011070583943
Patient_vs_Control	P06454	PTMA	0.0946343	3.8755947409204055	2.1465845148678664	0.0659853	0.0921271	-6.21416	3.7999583913566575	3.805951787774001	3.868107002778144	3.839093111483452	4.048541465886471	3.886263777516756	3.83483	3.922008783360372
Patient_vs_Control	P06493	CDK1	1.0346670110001313	22.31851447421184	11.104425611424608	5.8666231559253065e-6	4.4117489479471256e-5	3.9262396243997486	21.73962374001021	21.758351313625425	21.88253457604189	21.824214245169564	23.108745565830244	22.755281039875044	22.64528071596735	22.834084597175003
Patient_vs_Control	P06576	ATP5F1B	-0.314432	18.142954263143505	-10.7106	7.601464096080825e-6	5.3217536749359716e-5	3.6381460583343603	18.31928307503504	18.292708030140787	18.293936213110133	18.294753931867657	17.901671944803184	18.01405001847872	18.041672667640704	17.985558224071813
Patient_vs_Control	P06703	S100A6	0.5080386519758662	16.28410199339872	12.020623450259196	3.3109196548147833e-6	2.8678926832096736e-5	4.562033211282337	16.055365285159553	15.96281408712412	16.07443617062851	16.027715126730982	16.428756107551884	16.5847	16.6032	16.535871870256017
Patient_vs_Control	P06730	EIF4E	0.1144682117352005	17.162916153716633	9.125311403254114	2.366577964552763e-5	1.2290719983758377e-4	2.374698216010156	17.10916206357974	17.118739235371017	17.091335942336332	17.10349095010904	17.204381806426785	17.22301596333157	17.232580609554116	17.220622659024475
Patient_vs_Control	P06733	ENO1	0.28936018325214974	20.98394256309297	6.858175149922395	1.6688653201387364e-4	5.657406948771148e-4	0.2047919563615963	20.82342006813726	20.94398675860977	20.754126956776155	20.835516102344386	21.1951	21.089507202011202	21.097610824190596	21.132224910131185
Patient_vs_Control	P06737	PYGL	0.382423	18.475356735289694	9.834187540497538	1.3964480712323323e-5	8.276675175437086e-5	2.9615865202540963	18.25913413471917	18.26779748709899	18.316232997803095	18.293415353519077	18.777413685424044	18.633666502485912	18.589304765604997	18.665888955662258
Patient_vs_Control	P06744:Q8N196	GPI:SIX5	-0.164125	18.24908598241081	-5.29997	8.681534883557641e-4	0.00218703	-1.6158	18.317672452023253	18.40031830102584	18.276976795928466	18.32962572668948	18.224249025242045	18.136913073211225	18.13754240875156	18.16939007641462
Patient_vs_Control	P06746	POLB	-0.0836413	18.288262443745282	-2.67666	0.029456677696999035	0.0448637	-5.39814	18.34622284132544	18.372837159253436	18.27986317848637	18.321409097596025	18.173880520668103	18.262559654709737	18.301318232884608	18.248008865038532
Patient_vs_Control	P06748	NPM1	0.23768645307320213	20.65405471334524	15.814473225177565	4.4484306479778015e-7	7.1948922074277615e-6	6.785286168610412	20.5281	20.527529581742925	20.54711898598941	20.538102591848112	20.804535399142605	20.764017084041928	20.750440880773446	20.77259839556939
Patient_vs_Control	P06756	ITGAV	-0.519824	20.83658578709451	-18.8661	1.2029310355283348e-7	3.238712298439644e-6	8.222626092307873	21.079	21.094016632346403	21.11076526674546	21.102246707925953	20.654101102710666	20.552179778787597	20.523902382950048	20.576512120210356
Patient_vs_Control	P06865:A0A087WUJ7	HEXA:NA	-0.216477	16.47661246290726	-9.85272	1.3779354031850719e-5	8.199769386698837e-5	2.976434564057552	16.58494089210999	16.639778334337446	16.534453095393236	16.580231742209396	16.36621782901021	16.359778973417818	16.377199744599267	16.370299092180698
Patient_vs_Control	P07093	SERPINE2	-1.12651	23.648550710627326	-17.0231	2.5804389078840596e-7	5.156792894191338e-6	7.385232334203504	24.200284308826795	24.39681916606791	24.05014045886236	24.199985459918473	23.1302	23.039559385556597	23.079694118568828	23.09172823692805
Patient_vs_Control	P07099	EPHX1	-0.1496	16.022222543762656	-9.28073	2.1019081502934708e-5	1.1194845596967851e-4	2.5066400770277735	16.097573507490964	16.131897916419163	16.064685019373997	16.093933396223854	15.943874723092913	15.942666483189983	15.954502198049829	15.94864710626054
Patient_vs_Control	P07108	DBI	0.0916773	6.1682486394979135	1.508578642044858	0.17189722135179838	0.21401423875717507	-7.1244	6.164003282838218	6.092691633718834	6.121195586572972	6.111749387592077	6.0315735867633284	6.277840083206428	6.3337122791642955	6.213223276127154
Patient_vs_Control	P07195:A0A3B3IS95	LDHB:NA	-0.0374391	17.208266188043787	-0.510545	0.6241981031872548	0.6729506200314977	-8.10493	17.17668554013765	17.23797418486861	17.251319919268358	17.241963396124927	17.41106605744818	17.116410425341876	17.040992812506058	17.18971716865465
Patient_vs_Control	P07203	GPX1	-0.374816	16.983240315100304	-9.68879	1.5517663313596494e-5	8.971494656839398e-5	2.8442511666343666	17.192659988346914	17.214385701330027	17.11551116600389	17.16003655032275	16.697339013868895	16.82012792413154	16.86840335412909	16.797458822669334
Patient_vs_Control	P07204	THBD	-0.394546	15.70438016889597	-2.23157	0.057959578699610166	0.0820673	-6.08529	15.970512228878135	15.451338780925571	16.267232363999838	15.917529959715504	15.217800458252036	15.67634887277477	15.642658243460255	15.491620443161642
Patient_vs_Control	P07205	PGK2	-0.0907279	11.911251148826283	-3.30125	0.011690639202798773	0.0199498	-4.43112	11.973373640026445	11.971031360192104	11.931941362849091	11.95011410702636	11.791504435737526	11.887383280931038	11.918197171699187	11.866463832148506
Patient_vs_Control	P07237	P4HB	-0.185128	19.77969746920122	-15.8676	4.3396160440390025e-7	7.1041348431511375e-6	6.812606833827102	19.874071318390428	19.885423828224123	19.85896192049216	19.87058970728623	19.67872943084371	19.687611493075593	19.69458985699693	19.68760219830058
Patient_vs_Control	P07305	H1-0	-0.415628	2.2218730305112544	-4.81638	0.00154403	0.00352695	-2.24687	2.4890917427670285	2.4139539310207763	2.403473999992114	2.41223	1.7525325456351748	2.1008704668765628	2.1890717569580556	2.013760928881972
Patient_vs_Control	P07311	ACYP1	0.10181990209736824	17.504918431822215	6.923134845111227	1.5675460371557446e-4	5.388993014741642e-4	0.27421320600923416	17.461358410804642	17.44888125637619	17.45367998897851	17.452114266934792	17.523572506340532	17.56707436283561	17.576986606395597	17.555680055911857
Patient_vs_Control	P07327:P00325:P00326	ADH1A:ADH1B:ADH1C	-0.196013	13.789055176207704	-2.89064	0.0213662	0.033887	-5.06525	13.904663077440755	13.702067107747936	14.044555782908198	13.896961475718587	13.619336968057612	13.745407239702544	13.71480891166786	13.684640846418144
Patient_vs_Control	P07339:A0A1B0GU92	CTSD:NA	-0.304548	17.350247136449212	-8.17316	5.091645875422047e-5	2.235670365744545e-4	1.5226594285768797	17.48507077849514	17.58427839718998	17.439533350067947	17.501202792306213	17.27232719495799	17.16022225387113	17.15857881639427	17.200763508311038
Patient_vs_Control	P07384	CAPN1	-0.00479074	21.530749953692865	-0.261982	0.8003121623715699	0.8321439051575314	-8.21123	21.52308649779943	21.525802455941022	21.54675447291035	21.536937876025856	21.57295874536554	21.515244116593458	21.497161093841743	21.52805437106553
Patient_vs_Control	P07437	TUBB	-0.0286337	15.212343037725667	-0.718123	0.49421287550302995	0.5484410967968274	-7.9677	15.201174863247504	15.207041355917475	15.262069784906576	15.23635346037126	15.311067630855238	15.164970718206456	15.118836447300117	15.197230041000706
Patient_vs_Control	P07438:P04732:P04733:Q93083	MT1B:MT1E:MT1F:MT1L	0.395917	3.2798244451821272	5.417629251758641	7.583850546325615e-4	0.00195774	-1.46722	3.0401940091059014	2.990124869351268	3.1944415012152607	3.1027028711569447	3.66453	3.4332067164151763	3.3390010003288175	3.474390517316939
Patient_vs_Control	P07585	DCN	-0.435438	16.952274850980746	-3.51535	0.00860764	0.015320455252173966	-4.10554	17.210442044637634	16.840306558909518	17.444459507586743	17.184766540476268	16.566702283863975	16.844319072441472	16.804027375820073	16.723175424110277
Patient_vs_Control	P07602	PSAP	-0.310515	13.915146017412289	-10.6885	7.714430808101786e-6	5.3818303652472414e-5	3.6217387446722817	14.087830611698466	14.09065251266586	14.039927832033491	14.063204040629676	13.682370681328804	13.78140675432388	13.815103531805695	13.760672174812434
Patient_vs_Control	P07686	HEXB	-0.0911882	19.49657158973822	-5.30233	8.657919539059048e-4	0.00218356	-1.6128	19.533154583785368	19.560728489792364	19.531317755292267	19.54346191126358	19.490130284565897	19.43524023040493	19.426949907236125	19.45158955556522
Patient_vs_Control	P07711	CTSL	0.0365878	14.893587421605424	0.9979791401396058	0.34907184285846055	0.4044624875519643	-7.72065	14.85854178855829	14.956952779228722	14.811917220545643	14.873762326340868	14.983156283823082	14.8751	14.874559560059923	14.914671431855762
Patient_vs_Control	P07737	PFN1	0.14873108298409932	22.816095812996124	11.66294822259573	4.1193540614851474e-06	3.3932168714658414e-5	4.3192909502222765	22.746832504277688	22.744905026044023	22.735331058888427	22.739852496806176	22.867853984394745	22.89719881219274	22.906198256004895	22.890594365360297
Patient_vs_Control	P07738	BPGM	-0.546511	17.54121955828755	-22.8814	2.8497945279572178e-8	1.2871659977273996e-6	9.788578860936514	17.829476770368206	17.80516341936241	17.812748111243952	17.810512709342458	17.2021	17.290734279415403	17.311328330231056	17.267701528283833
Patient_vs_Control	P07741	APRT	-0.098805	17.92264332553408	-3.38806	0.010318420399899208	0.017896699705478386	-4.2986	17.953083136195193	17.97886294559041	17.97876846056453	17.977468672045035	17.956665722940393	17.845244521820323	17.817654275306236	17.8734
Patient_vs_Control	P07814	EPRS1	0.0785076	20.360292955108076	5.539294433885001	6.607415329775249e-4	0.00174556	-1.31558	20.320035540404877	20.349059485662213	20.296047234850327	20.319014358089092	20.403075987760182	20.393672674508647	20.40091397734812	20.400524382241137
Patient_vs_Control	P07858	CTSB	0.00900346	20.860269831359535	0.23997954905540952	0.8167068406112636	0.8455399617387561	-8.21742	20.83280280921146	20.90934616819419	20.822375847778837	20.858547575067973	20.964353761741492	20.8237	20.804512711169384	20.86655114238575
Patient_vs_Control	P07900:Q14568	HSP90AA1:HSP90AA2P	0.20448637716812357	19.80344116861742	3.7243544191009357	0.00642303	0.011897762862906655	-3.79227	19.66405150427175	19.741981789425267	19.689230227223867	19.70952839921256	20.068228846700737	19.84648577818037	19.80106768904441	19.90695511488041
Patient_vs_Control	P07902:G3V4G9	GALT:NA	-0.065862	17.496359076737164	-2.30839	0.051547329069706424	0.0740068	-5.96791	17.54726922917131	17.50153482929451	17.54242821697165	17.525928054532688	17.385012220384308	17.4934	17.512814465756502	17.462532127289244
Patient_vs_Control	P07910	HNRNPC	0.0672252	19.879553291543406	2.275840088197604	0.054172750749621267	0.0772446	-6.01774	19.827609007478316	19.831894009464584	19.87135173986564	19.85290794892683	19.99447587264052	19.889378346491583	19.85621391079141	19.91259549668836
Patient_vs_Control	P07919:A0A096LP55	UQCRH:UQCRHL	-0.0423891	3.115366817136189	-0.639155	0.5415465959868928	0.5954948557403776	-8.02484	3.166696611581962	2.981302829714057	3.258231437419612	3.140014536879832	2.966221175496253	3.1615984882551853	3.1600093331627033	3.088860124579904
Patient_vs_Control	P07942	LAMB1	-0.258753	19.473158401505763	-6.86509	1.657742171983615e-4	5.63015504177877e-4	0.21220348390370347	19.62702481685208	19.564823590439357	19.620343435977848	19.597947285402036	19.236965953168337	19.38452934928197	19.4111	19.342564961037773
Patient_vs_Control	P07947	YES1	0.0946117	15.255957388033751	8.525319978906438	3.803625105789742e-5	1.775835711155799e-4	1.846914367410628	15.206784437950777	15.21932167341997	15.200150337511433	15.208349801305072	15.31115717009738	15.29891877787853	15.299347746128756	15.3036
Patient_vs_Control	P07954	FH	-0.0300702	19.253766680675575	-1.38083	0.2066670215078622	0.2525661240251732	-7.28802	19.282040731288337	19.254109112722222	19.273211251042643	19.265845961941174	19.18080594320044	19.25985489791116	19.275992360665143	19.23827318663347
Patient_vs_Control	P07996:P35442	THBS1:THBS2	0.1217300874023195	20.160459160622054	2.7099288649376656	0.028015	0.0429219	-5.34637	20.070008455165777	20.144104783819415	20.079039582265597	20.1052	20.350398971958867	20.17226487880234	20.13987516160856	20.222757804923084
Patient_vs_Control	P08047	SP1	0.1334008480382476	11.809674035314675	1.241505500472293	0.25145400606861396	0.3016952271299736	-7.45637	11.67309953527552	11.67796470422974	11.850341237432811	11.770488968244123	12.186667725895711	11.78752547967592	11.657506242978403	11.873798388785165
Patient_vs_Control	P08069	IGF1R	-0.286258	15.798343577763722	-4.97073	0.00128021	0.0030204	-2.04185	15.98007743965356	15.88871635348975	15.963415080573895	15.933682208218896	15.486621438196552	15.718383840125856	15.76232196782113	15.65353029403014
Patient_vs_Control	P08123	COL1A2	-0.740286	19.81549853134659	-6.1505	3.4029992228309073e-4	0.00100847	-0.583747	20.26602498811562	20.052383433960905	20.252781139513708	20.171376131170497	19.09505724850769	19.580605687602095	19.66473089149742	19.44102873040481
Patient_vs_Control	P08133	ANXA6	-0.011914	21.284620265993237	-0.467769	0.6531008938271665	0.6998741894226549	-8.12787	21.278273137443275	21.34022785981216	21.253492205626262	21.29031580317132	21.331345442838508	21.25331546995719	21.249641511734623	21.28035069736255
Patient_vs_Control	P08134	RHOC	0.13579258115600723	18.227809651511855	6.689240798297625	1.968242107819656e-4	6.427595649060433e-4	0.021985704570449016	18.15198756299176	18.20190842778601	18.126849335180125	18.15890811777753	18.329320847852095	18.27778799148428	18.278571168726177	18.29714376029687
Patient_vs_Control	P08174	CD55	0.23452037356869582	22.90362181936471	3.930371926124535	0.00484264	0.00931041	-3.4885	22.815038253320655	22.889058641483565	22.6726	22.768715641835232	22.89110104736684	23.045274442588752	23.122549457932724	23.024603076707912
Patient_vs_Control	P08183:P21439:Q2M3G0:Q9NP78	ABCB1:ABCB4:ABCB5:ABCB9	-2.05104	17.427483961657938	-135.743	4.105476442389028e-14	2.2114957981905072e-10	21.057783258948387	18.44573083336449	18.46772765262051	18.444484539054745	18.45407128660197	16.43357231798187	16.38930392823484	16.382531834755333	16.40244930064975
Patient_vs_Control	P08236	GUSB	-0.394115	16.47605083829243	-7.48427	9.29066956926376e-5	3.540999816432162e-4	0.8545267697415859	16.69941025411692	16.559416686479235	16.75930732847588	16.67429857659992	16.16661882438754	16.334378312535744	16.339855143511603	16.2751
Patient_vs_Control	P08237	PFKM	0.1782191889387974	18.56272814711537	6.710823515318883	1.9268544420048664e-4	6.307509800305832e-4	0.045525285447949315	18.471813292230188	18.543492616281657	18.410819376697603	18.46834892537443	18.657562170832136	18.638179479546984	18.657330700371865	18.654278615588098
Patient_vs_Control	P08238:Q58FF7	HSP90AB1:HSP90AB3P	0.0783728	22.048029371861197	3.5889715120988117	0.00775878	0.014040790576445049	-3.99464	21.99746449890396	21.98615923549951	22.03741345398936	22.014334798338112	22.13813235927405	22.074668415921685	22.04968989002816	22.086372322934743
Patient_vs_Control	P08240	SRPRA	0.27575190389046256	20.969276339300315	13.942011504158055	1.1239083970847804e-6	1.3026177850266593e-5	5.7606200504878124	20.83599284785306	20.872972207442505	20.79016203997951	20.826474454145277	21.08556341628901	21.10706874627118	21.12734833914614	21.108628663275848
Patient_vs_Control	P08243	ASNS	0.22125019308724347	8.316377316291344	3.1566925175246596	0.014423286370619319	0.023974594406156072	-4.65319	8.25111	8.247200655972996	8.136745851097258	8.187954452629313	8.225613116697383	8.48479	8.568954411419018	8.42865
Patient_vs_Control	P08253	MMP2	-0.637005	10.643825299305941	-6.64707	2.0519973552796502e-4	6.653501193717587e-4	-0.0241673	10.92826670784143	11.211813313601205	10.756991718319966	10.952239834433556	10.46757222249016	10.237361119290968	10.262437399525131	10.333920078945116
Patient_vs_Control	P08397	HMBS	0.27354822428185344	15.905327818906118	7.725056962168275	7.49273909515368e-5	3.0170444644168264e-4	1.0933686942540266	15.748698182016096	15.727788573444592	15.81949236633182	15.778235705268251	16.130989488245543	16.02039447047757	15.976435029047256	16.04058873641782
Patient_vs_Control	P08473	MME	0.21131406935361596	15.296477100734354	6.053068531214994	3.7708941809017993e-4	0.00109727	-0.697146	15.17866909590405	15.277807138297884	15.119414422038334	15.187389607989909	15.452944683818416	15.37107462503132	15.379386658552637	15.405130574242284
Patient_vs_Control	P08476	INHBA	-0.0420902	16.25781626404931	-0.605979	0.562227	0.6143021284980088	-8.04706	16.232904866447793	16.251301074015444	16.335551300854036	16.29568821470408	16.4404	16.17592159259453	16.09518804361577	16.235609391720327
Patient_vs_Control	P08559:P29803	PDHA1:PDHA2	-0.26353	18.46436296612166	-6.85277	1.6776139255295826e-4	5.676523115948569e-4	0.19899736860953787	18.62100619548187	18.55533240924281	18.616497821582147	18.59167566320204	18.2242	18.37438593242274	18.40056269076612	18.331274419003247
Patient_vs_Control	P08571	CD14	-0.20499	15.067982582925406	-9.57084	1.692080370925386e-5	9.595481458390927e-5	2.7479401248986477	15.178371714472572	15.12374573505637	15.207904575918873	15.171888969604892	14.932164673561662	14.984112418705028	14.981789108151965	14.963883467931892
Patient_vs_Control	P08572	COL4A2	-0.964452	22.09597287112338	-7.22245	1.1812571945315428e-4	4.274301305485295e-4	0.5879889346813414	22.669845109925618	22.476581807728973	22.60863886868534	22.557729752193502	21.21275585695843	21.75995742646073	21.871697386054468	21.610576760979978
Patient_vs_Control	P08574	CYC1	0.00494166	18.592848784546558	0.0815343	0.9371282368744458	0.9494209796531979	-8.24611	18.55375499118821	18.530827105786173	18.670000731163977	18.606928982907792	18.75876921813373	18.55279727798495	18.476635355407208	18.59307661380043
Patient_vs_Control	P08579	SNRPB2	-0.0382076	15.380363078814733	-1.44766	0.18776738014221264	0.23187509044451832	-7.20345	15.40699261578885	15.33377339081166	15.454522254811016	15.402579300824412	15.330168258741397	15.382372721757015	15.373506801094049	15.35898928668947
Patient_vs_Control	P08581	MET	-0.068312	22.62418404884862	-1.15196	0.28436722792312563	0.336977	-7.55829	22.684818844270687	22.76903385047708	22.538787287708733	22.640720261103347	22.46968543251309	22.610031182960252	22.686375568882603	22.59401996287317
Patient_vs_Control	P08582	MELTF	-0.633442	20.337279663193137	-55.1001	3.791574619947534e-11	2.3071731562380742e-8	16.454153732029837	20.653021935504313	20.64014989013626	20.667362582814945	20.655467289151087	20.025318675324048	20.021369605208648	20.01547795779692	20.020069369608876
Patient_vs_Control	P08603:Q02985:A0A8Q3SIA1	CFH:CFHR3:NA	-0.0775733	15.545484406804645	-2.69376	0.0287064	0.0438248	-5.37153	15.602558745466444	15.590400841664287	15.56614522728127	15.578	15.425835369479971	15.531680128389876	15.562285012990822	15.506990562671788
Patient_vs_Control	P08621	SNRNP70	-0.0150483	17.046176439768757	-0.63281	0.5454664308792462	0.5991075818029958	-8.02917	17.039037700707414	17.050392587526403	17.066761137009202	17.058610873554713	17.10343539832522	17.01836656393264	16.994333404378047	17.038473852716432
Patient_vs_Control	P08648	ITGA5	0.1974394962764343	22.19660635741709	5.894946705407625	4.4654788421475463e-4	0.00125847	-0.88377	22.08384625649974	22.035782760519343	22.16440303648204	22.10751438361436	22.35924686703345	22.28526073567579	22.243706874387676	22.293089945124308
Patient_vs_Control	P08651	NFIC	0.3509552890741876	15.576445761686081	4.789168479930198	0.00159645	0.00362702	-2.28336	15.352277295792137	15.374162940412631	15.45883626662576	15.41859596576542	15.967554629664622	15.687073089975687	15.60228947105838	15.750776434194009
Patient_vs_Control	P08670	VIM	0.0709267	24.907456956569515	1.8627737261243205	0.1015486075022935	0.13506519708228545	-6.63423	24.869167075417323	24.976555448401484	24.778104406076167	24.864147489173547	24.952038246036302	24.922304112459855	24.950766496008296	24.946572378983134
Patient_vs_Control	P08729	KRT7	-0.994209	19.225067380576363	-22.8494	2.87980785325381e-8	1.2871659977273996e-6	9.777268016464124	19.747880913381746	19.65022904688663	19.77051714795861	19.72006017806015	18.616866316154734	18.77587647872149	18.793557450434783	18.725551513012743
Patient_vs_Control	P08754	GNAI3	-0.090552	13.062183859275907	-4.12981	0.00370617	0.00737641	-3.1996	13.12058034973371	13.11294790819628	13.093456338437338	13.10285474528225	12.9589	13.034658350158663	13.056958817435078	13.017156153684637
Patient_vs_Control	P08758	ANXA5	-0.126222	16.84965750564882	-7.6641	7.908008410924826e-5	3.1451131490508217e-4	1.0334555535523986	16.906272864192694	16.941519639802838	16.890863522690616	16.912418368518896	16.814277672041634	16.772761315005525	16.77162043940481	16.787526223533565
Patient_vs_Control	P08865:A0A8I5KQE6	RPSA:RPSA2	0.1597738706276246	23.65622821551955	7.135155729322263	1.2816493520573555e-4	4.5696306487904344e-4	0.4974999595117815	23.575110521272777	23.633107517078884	23.525161422541267	23.571985659930025	23.739725406217687	23.725353812443576	23.741282242866873	23.73809914180533
Patient_vs_Control	P08908:Q8N3R9	HTR1A:PALS1	0.16900315705620983	20.432339232323187	10.083526862594242	1.1690639611651662e-5	7.258932860908201e-5	3.1593194950339765	20.3515	20.311354962390883	20.3788	20.349731426864633	20.5019	20.527823698922404	20.522079809544987	20.515577953211785
Patient_vs_Control	P08962	CD63	0.17417880707640165	18.100927465166812	1.9335036220910788	0.0912471	0.12288571764882536	-6.53133	18.017	18.264741036897885	17.781756633942518	17.99187440079844	18.166119296873937	18.152632904127604	18.23649269870089	18.196822575117633
Patient_vs_Control	P09001	MRPL3	-0.0332865	18.935485522468078	-1.18684	0.2711466023639606	0.32298735570336706	-7.51921	18.96946472456301	18.92079796893145	18.968983540768907	18.949268857215905	18.843378064419035	18.948422583455844	18.965750151786377	18.91781828860409
Patient_vs_Control	P09012	SNRPA	-0.0771981	17.540490917597687	-4.94212	0.00132512	0.00311127	-2.0796	17.58697501526462	17.584153446165956	17.56905653548896	17.576174908952538	17.466949179914426	17.512279030257737	17.52623630195553	17.502102922781717
Patient_vs_Control	P09038	FGF2	-0.197384	15.939414194907839	-10.082	1.1702850598017496e-5	7.260341127164296e-5	3.1581580567733116	16.029804946740892	16.009636415715995	16.06987450447123	16.043109221084176	15.878250856074027	15.833461060980891	15.811487497678542	15.83968905651696
Patient_vs_Control	P09104	ENO2	0.25282168463405164	14.339781257434492	16.845950917495617	2.7882628229368393e-7	5.45841692576e-6	7.300011690148262	14.2205	14.220592114436398	14.201870321792764	14.210511150893195	14.434476934251624	14.475175783860935	14.488640074278653	14.46647560661486
Patient_vs_Control	P09110	ACAA1	-0.179853	15.264685558816687	-13.2984	1.5880709260504227e-6	1.6781612014500992e-5	5.3774976050493475	15.354035261816035	15.379877000945532	15.331853813108427	15.352682953236188	15.17649457806943	15.169927869832971	15.17697125012182	15.17564174340309
Patient_vs_Control	P09132	SRP19	0.20624823983815688	14.558888414741833	15.594153572402394	4.933600218009557e-7	7.664365449360511e-6	6.671051826073041	14.449928779399098	14.45997950503396	14.455892750083096	14.457256144774872	14.687617629956474	14.653060795431752	14.645236352643822	14.662135360611591
Patient_vs_Control	P09211	GSTP1	-0.595191	14.132844790169866	-28.8045	5.065844023330098e-9	4.19923991858113e-7	11.631962116241677	14.442899152363973	14.426807060864837	14.425248281913994	14.426806662768188	13.780410335057445	13.853509143674684	13.871902579617489	13.835175105098322
Patient_vs_Control	P09234	SNRPC	-0.0833104	16.38281317612035	-2.45737	0.041075912638961855	0.0602282	-5.73848	16.44673935282419	16.424306858719696	16.409383591383712	16.417443731716705	16.242927140336555	16.372792857936627	16.407664590688555	16.34124728535677
Patient_vs_Control	P09382	LGALS1	0.1493903348362302	21.22056322589784	4.974150362796519	0.00127497	0.00300996	-2.03735	21.151743366457723	21.218823716415887	21.075	21.137913627959787	21.267005542320224	21.292011820725083	21.324176201008537	21.297840009209985
Patient_vs_Control	P09417	QDPR	-0.282468	15.498276251359009	-9.04517	2.517521920926471e-5	1.2864202285937782e-4	2.30592	15.61900302003411	15.651418681855873	15.642623472761931	15.644995636334368	15.447116841105244	15.32604533209628	15.297634877157536	15.357372149526729
Patient_vs_Control	P09429:B2RPK0	HMGB1:HMGB1P1	0.28146924421787034	17.4779	3.6693794568698888	0.00693302	0.012713445014595957	-3.87419	17.285434632140426	17.320736974025753	17.387476628252635	17.35481844216103	17.847077233216062	17.547834583693593	17.461640315021413	17.617791521520264
Patient_vs_Control	P09455	RBP1	0.14757160827215898	9.157660785705357	1.7653932499291212	0.11756729182600713	0.15381874344890958	-6.77351	9.114661343083162	8.868863062249607	9.259858882247968	9.092116638696366	9.102537752005563	9.309285793143754	9.289919521102409	9.224043293114022
Patient_vs_Control	P09486	SPARC	0.362299	17.159944210345586	5.774	5.092679279208468e-4	0.0014001	-1.02873	16.95623582112487	16.84211367692586	17.119481975161513	16.99734798071031	17.444978930346423	17.330780526112555	17.252407092462843	17.336207679920307
Patient_vs_Control	P09488	GSTM1	-0.244046	11.697031868911077	-3.13355	0.014920004819919949	0.024665129091024557	-4.68887	11.765719358790324	11.871823347921936	11.807177623062682	11.831500023983695	11.80857910300591	11.490929484808518	11.423895676583305	11.576630333132252
Patient_vs_Control	P09496	CLTA	-0.0959617	14.295129680208568	-3.0712	0.0163505	0.026723085666093837	-4.7852	14.348974586997269	14.259942893287434	14.415316076519414	14.348208572958278	14.223947154901488	14.26867877548894	14.251709960547572	14.244259420968149
Patient_vs_Control	P09497	CLTB	0.12271167168323771	18.200425924489032	3.4705318816428496	0.00917265	0.016155020130265343	-4.17333	18.13794973676361	18.044124672740015	18.22684618215044	18.147359762935587	18.269765225390273	18.27526904274081	18.243642930225068	18.25844984296646
Patient_vs_Control	P09525	ANXA4	-0.529116	14.920601535805194	-15.124	6.182089087251689e-7	8.921267690733564e-6	6.421915509939197	15.203842705060168	15.118680930230154	15.233303288060736	15.18481172768158	14.57576325279578	14.6931	14.70149972364091	14.653793493456522
Patient_vs_Control	P09543	CNP	-0.157079	17.237315160663762	-9.1574	2.309014979623825e-5	1.2069024610746722e-4	2.402091806065526	17.310643043474315	17.351373358451934	17.286869168402742	17.314532918886677	17.18062581030653	17.14573849199233	17.148740349299423	17.159998144496154
Patient_vs_Control	P09601	HMOX1	-0.117188	14.808863567020497	-4.35781	0.00274968	0.00571702	-2.87589	14.855673976194112	14.822438883692882	14.916773133657776	14.874944096768187	14.803688386892391	14.740694188581518	14.708054083818682	14.74864178655843
Patient_vs_Control	P09619	PDGFRB	0.21890205208972802	13.741593128786796	1.9048319602333217	0.0952955	0.1276316647996689	-6.5732	13.563419479671024	13.506714624656809	13.794090898991488	13.664343407648408	14.158193985843582	13.773423947688505	13.626202918179882	13.846355767614666
Patient_vs_Control	P09622	DLD	-0.186804	19.02142190027853	-9.87961	1.3515706941867506e-5	8.102766181405298e-5	2.997928278542176	19.111459069550236	19.073818678255076	19.15470359502475	19.119314655857757	18.944175959560447	18.92975562222143	18.91157910634536	18.926568515413177
Patient_vs_Control	P09651:A0A2R8Y4L2	HNRNPA1:HNRNPA1L3	0.0453087	16.132524822252968	0.9624826996000332	0.3654963071966846	0.4213536525339739	-7.75558	16.078620496963126	16.100173465052734	16.14013124997855	16.12055669164618	16.29333173459287	16.112365892057905	16.060312957179107	16.154706090553265
Patient_vs_Control	P09661	SNRPA1	-0.0132104	14.881076290330803	-1.21234	0.26180660531502686	0.3127289108474278	-7.49014	14.8899	14.880471966942023	14.892790640656566	14.887592026393738	14.86504297884712	14.87872396672418	14.87988966401073	14.87422780083906
Patient_vs_Control	P09669	COX6C	0.095618	16.039363024863654	1.0402625410989814	0.3302528678252877	0.38553260445407683	-7.67779	15.92813168172542	16.036963577319074	15.993319211094082	16.00780160786528	16.3655	15.989945486068592	15.904780112926916	16.088492830059966
Patient_vs_Control	P09871:P48740	C1S:MASP1	0.196115	18.255212458506623	3.383023713411105	0.010393094606005042	0.0179963	-4.30626	18.14713743333918	18.31864635874781	18.016013358332597	18.146823397771865	18.392283806655577	18.31340670704752	18.348502466567783	18.35888613959066
Patient_vs_Control	P09874	PARP1	0.046856794999008855	19.149996701911977	2.1314243776789383	0.0675287	0.0940662	-6.23703	19.11780550068766	19.173260393418204	19.089772329697315	19.125434993846714	19.210581517985485	19.153573294020063	19.15452164139763	19.175023944242746
Patient_vs_Control	P09913	IFIT2	-0.553913	15.011334632814805	-4.12941	0.00370813	0.00737786	-3.20017	15.371086910025587	15.414899458471307	15.11563415160624	15.251543505683834	14.365114139296267	14.831785167042913	15.00144568245009	14.739168047942202
Patient_vs_Control	P09914:Q5T764	IFIT1:IFIT1B	-0.387314	18.06930350862918	-2.95273	0.019480440021259583	0.0311943	-4.96879	18.349859155796803	18.323727192354763	18.14783630455884	18.230419646056944	17.490394938876506	17.989332021074436	18.144712355379035	17.878146454936097
Patient_vs_Control	P09936	UCHL1	-0.221074	15.507927710050984	-3.49506	0.00885868	0.015692886089822035	-4.1362	15.578354887035609	15.707506031177603	15.564299095274595	15.623697884367504	15.571459578350275	15.326323450178716	15.29144060761454	15.400340146409032
Patient_vs_Control	P09960	LTA4H	-0.173628	17.775028402494577	-8.46048	4.010407742803159e-5	1.8499050750441358e-4	1.7880477471379983	17.871349501259548	17.88884840361684	17.830591409257742	17.856580995567224	17.645414562664726	17.697418882327675	17.720822338495626	17.689201126767234
Patient_vs_Control	P09972	ALDOC	-0.0421322	11.379083277210002	-1.44323	0.18897275589986132	0.23328471066454565	-7.20913	11.38115007137509	11.412374324562045	11.40194123044285	11.405131810082768	11.441430356916031	11.329110128062052	11.303163730271075	11.358364565968106
Patient_vs_Control	P0C0L4:P0C0L5:A0A0G2JL54	C4A:C4B:C4B_2	0.11195912221080562	11.299806558895895	1.5369125130486843	0.16493538501097607	0.20650860448390726	-7.08704	11.241706041161567	11.04133287847158	11.430847174861182	11.261421896667644	11.37162860897097	11.384932053358204	11.317902674389844	11.34868114328617
Patient_vs_Control	P0C0S5:Q71UI9	H2AZ1:H2AZ2	-0.0123708	15.196012469984334	-1.03633	0.3319698506220238	0.38728931925898985	-7.68183	15.199839808753396	15.18887849077768	15.216016904877304	15.204056340549172	15.200655099914153	15.18859535838953	15.180707506155702	15.189350250457732
Patient_vs_Control	P0C7P0	CISD3	-0.0713768	13.941777197187557	-1.5367	0.1649872529342852	0.20653813148056754	-7.08732	14.008480187430305	13.982670710352703	13.951482293890992	13.967229211384456	13.769118431631586	13.94928129448732	13.999551988675384	13.906403459647706
Patient_vs_Control	P0CAP2	POLR2M	-0.168272	13.970798830269901	-5.21665	9.564672158416539e-4	0.00237683	-1.72219	14.076172421039702	14.047560592701894	14.047166999952946	14.048839749514531	13.793221622293924	13.917976177340504	13.94895820670713	13.886494872608573
Patient_vs_Control	P0CG29:P0CG30	GSTT2:GSTT2B	-0.760028	15.011950823394328	-37.1486	7.454027108033907e-10	1.8428764344582924e-7	13.609548354161173	15.382155284963083	15.427619780979644	15.365999883357429	15.392085042701344	14.67406451522979	14.612351694692212	14.6082	14.63314425244522
Patient_vs_Control	P0CG39	POTEJ	-0.864968	1.081939630668401	-5.83068	4.7873672206603447e-4	0.00132968	-0.960553	1.6080240606732392	1.6366977061928871	1.3383487539393286	1.474623868426061	0.23267208783007295	0.7628858059013108	0.9481251192351916	0.6541396431491169
Patient_vs_Control	P0DI81:P0DI82	TRAPPC2:TRAPPC2B	-0.147274	12.762097173790739	-1.04755	0.32709265234219953	0.382338	-7.67027	12.915661725924783	13.018815861854966	12.61328642349069	12.795173262310223	12.33003952291814	12.772827706210238	12.955756335607028	12.695216552009835
Patient_vs_Control	P0DJ93	SMIM13	0.2921062907202092	13.487437741144097	22.675300314385872	3.0494333892995336e-8	1.3268733932404452e-6	9.715455199716995	13.337559867730045	13.35930026659729	13.32758235524254	13.341095893566091	13.649787605209095	13.62521741951435	13.62485613309007	13.634102388203296
Patient_vs_Control	P0DJI8:P0DJI9:A0A096LPE2	SAA1:SAA2:SAA2-SAA4	0.941517	7.053457786788442	3.933498959020844	0.00482215	0.0092808	-3.48393	6.678835953747628	7.081549313807786	6.059788462052495	6.510623590551218	7.084181884081346	7.581445443401987	7.889130389625889	7.542107257039193
Patient_vs_Control	P0DMQ5	INAFM2	0.1897560238116185	16.507579460038887	8.751246080319328	3.171092415896775e-5	1.539050029818045e-4	2.049186872025027	16.402668519820853	16.382709921873843	16.447048543717614	16.418378807119993	16.647672962644236	16.592980389106863	16.567812833350178	16.60136370267751
Patient_vs_Control	P0DMV8:P0DMV9	HSPA1A:HSPA1B	-0.105617	14.230553457174542	-2.96171	0.019222492509342135	0.030828605381773837	-4.95485	14.260642497676152	14.267695177041729	14.313258288427336	14.291850973343006	14.278460356228113	14.147987574891676	14.107433496049476	14.177099293738848
Patient_vs_Control	P0DP23:P0DP24:P0DP25	CALM1:CALM2:CALM3	0.19902583851257916	16.811198515687384	1.7969586000247473	0.11212869907509627	0.14736568766133062	-6.72869	16.636035338105618	16.70304106143606	16.77135060372901	16.73631538245369	17.24467743994106	16.80471360319917	16.683368808143854	16.910085888490595
Patient_vs_Control	P0DPB5	POLR1D	0.2036690481310739	13.018676303740936	6.334004885343075	2.813439587652901e-4	8.615624914751832e-4	-0.373436	12.913328231144815	12.833783824070489	12.995360866644967	12.924894196841324	13.13866972511557	13.128713703304845	13.097074610242274	13.117585272563202
Patient_vs_Control	P0DPB6	POLR1D	0.021668676878910276	12.379146187040591	1.8079934900922825	0.11028437465807464	0.14525550211999658	-6.71294	12.371650672473638	12.377894507659438	12.357246439476487	12.366455774794982	12.374946171144163	12.393197592914374	12.40144777177372	12.39033056608793
Patient_vs_Control	P0DPI2	GATD3	-0.177275	17.41177939888414	-2.39975	0.0448432	0.0651762	-5.82745	17.55103413670762	17.453429875936575	17.50885591291664	17.488347978314987	17.101377619761756	17.402444462816373	17.467034073032085	17.321711131587087
Patient_vs_Control	P10109	FDX1	-0.0753719	15.024634250154879	-1.57847	0.15518752688260784	0.1960517856914883	-7.03159	15.093153364826442	15.004850025240415	15.093897823449767	15.05737960184161	14.852786048040503	15.0398	15.070105077180305	14.985065880266786
Patient_vs_Control	P10114	RAP2A	-0.00232472	11.662843578244617	-0.0478878	0.9630430289623316	0.9708467075345335	-8.24858	11.636027921165889	11.750262014338167	11.604095513300416	11.665638294878478	11.782327397963952	11.608274430789171	11.591538506288607	11.664584547232256
Patient_vs_Control	P10155	RO60	-0.0894598	15.275736959640787	-7.59993	8.373152932198849e-5	3.285371451419452e-4	0.9699816405902286	15.320568243637863	15.33695395030808	15.30528846400626	15.3191	15.230031728598266	15.228532762248374	15.23387846490737	15.23158522962298
Patient_vs_Control	P10253	GAA	-0.0172175	18.91235052746253	-0.304359	0.7690405813943029	0.8053218431904018	-8.1978	18.95846894391409	18.86236913982308	18.94899663832218	18.914002328326717	18.740165663442284	18.966283525251775	19.00666937754479	18.9018
Patient_vs_Control	P10301	RRAS	0.1748752178783377	19.982159193640772	9.186415099197449	2.2583041088657867e-5	1.1846362502110614e-4	2.4267967029142135	19.89488980105944	19.940026445773523	19.85308828548776	19.89088180648568	20.06740343069246	20.06264110785971	20.077157549172455	20.07118512259514
Patient_vs_Control	P10321	HLA-C	2.085295631559214	13.535320789030685	29.827891961711018	3.8958415486535424e-9	3.6504655355389067e-7	11.90781793727525	12.513683335516184	12.305438625003005	12.649887527853371	12.501682404631756	14.491291276812028	14.637521611004932	14.611564514331132	14.571497017093078
Patient_vs_Control	P10398	ARAF	0.14926902014330778	19.203695428305757	9.127975208841926	2.3617381883959606e-5	1.2274314769869965e-4	2.376975602649747	19.132379202428957	19.160730993718293	19.097768225926483	19.125365250862675	19.262678594653515	19.27801035614984	19.293176909590695	19.279453893115605
Patient_vs_Control	P10412	H1-4	0.24669625868321532	12.055542475734025	1.0626582280373045	0.3206109101307204	0.37553751456119994	-7.65455	11.795225111700097	11.661432479722452	12.274009432709656	11.998110361437472	12.791728341584188	12.027487026698903	11.727528782379842	12.168818269639598
Patient_vs_Control	P10415:Q07817	BCL2:BCL2L1	-0.0239937	19.096241605805297	-0.375826	0.7173433724522764	0.7590264172796004	-8.17072	19.15188889295982	19.09882635519103	19.087008028759747	19.09523056390079	18.892006651706996	19.14769256266975	19.21317871284492	19.08410107840933
Patient_vs_Control	P10515	DLAT	-0.250521	17.799175630210833	-7.63825	8.091831689904111e-5	3.2031603021251924e-4	1.0079346825468285	17.945751489638518	17.89719009336621	17.93482611110238	17.91997743088112	17.580767638098287	17.708494419010638	17.733346758098463	17.67305110149105
Patient_vs_Control	P10586	PTPRF	-0.066613	18.533617669865343	-3.01992	0.017634969823639313	0.0285903	-4.86459	18.58012940974329	18.54672735312395	18.57640078427478	18.56443903466239	18.44271053104682	18.522260722225592	18.53661376347431	18.49965976037162
Patient_vs_Control	P10599	TXN	0.0982349	18.512048727494793	1.0960732501141068	0.30663963406658995	0.3610258961551499	-7.61919	18.402164350686096	18.448642271261026	18.517589095276524	18.483329325107704	18.82966340438475	18.477188677618905	18.377406372633203	18.56040632299013
Patient_vs_Control	P10606	COX5B	-0.00742529	14.570398881818862	-0.14988	0.8847694687635224	0.9058590382657377	-8.23719	14.541221215926951	14.562410258572411	14.607330994186633	14.585483646438576	14.712138430345313	14.521863106363664	14.466607475860704	14.566135926856647
Patient_vs_Control	P10619	CTSA	0.0598301	17.416219560690458	0.9466318997627666	0.37301636668802957	0.4289394503237782	-7.77086	17.343240123587428	17.429736286026685	17.37595777090278	17.39628378257884	17.63469777868467	17.378116272260343	17.324251528250954	17.447472943231958
Patient_vs_Control	P10620	MGST1	0.6532789904488503	12.035597198956838	12.448443793652316	2.569111318753585e-6	2.3614615183716734e-5	4.843747308379134	11.67323532213858	11.720864562166495	11.722479295592098	11.719251635032483	12.519424680882164	12.309645015999008	12.257375479818233	12.362501600025643
Patient_vs_Control	P10643:Q12884	C7:FAP	-0.760653	21.592446793429694	-12.1312	3.098444664370352e-6	2.7258846914737724e-5	4.635707417417345	21.99335789709078	22.11504218211647	21.82831618250286	21.95437723300401	21.11676532886157	21.218743486500887	21.295778562338302	21.21719347502266
Patient_vs_Control	P10644	PRKAR1A	0.15303729668118393	19.910013723934092	5.048211271311959	0.00116679	0.00279081	-1.94022	19.8273	19.913502838528792	19.764409485984928	19.828764721546392	20.011281026525104	19.96503901813861	19.980499793394923	19.989309651040102
Patient_vs_Control	P10646	TFPI	0.2665307809475834	22.861899474124755	5.247352337671226	9.228236110843666e-4	0.00230611	-1.68287	22.74655050665983	22.839131128608884	22.61511806325671	22.71373663607843	22.912596657222164	23.003046675662397	23.065902744443346	22.999113381066284
Patient_vs_Control	P10746	UROS	0.2065525184903585	20.87959740614427	17.893938322965052	1.7823695263711708e-7	4.079894132151188e-6	7.791759782009482	20.77322009757689	20.786515713397947	20.76909969521003	20.776449081411513	20.996225629571526	20.97685343426147	20.97519791242568	20.98321768529912
Patient_vs_Control	P10768	ESD	0.0748181	16.32417047392909	3.3295492093645245	0.011223124068493238	0.019269	-4.38785	16.27640103907582	16.3302	16.254083192959747	16.286408886981228	16.40588854834638	16.339984444642333	16.337389205306195	16.363055877690424
Patient_vs_Control	P10809	HSPD1	-0.246122	20.333850213159668	-14.8884	6.939422061392478e-7	9.558497837407894e-6	6.29419	20.459169624218035	20.420108500736156	20.489093088757553	20.45927343007683	20.20200631368597	20.219838996589868	20.211802517313604	20.20950923389932
Patient_vs_Control	P10909	CLU	-0.431392	14.512572811628528	-5.23639	9.346831788707468e-4	0.00233176	-1.69689	14.73955527311898	14.495702689508912	14.933676914114816	14.744139943443637	14.254542941732296	14.349827621805243	14.29436178901824	14.288775320286105
Patient_vs_Control	P10915	HAPLN1	-0.249268	19.195597238263968	-4.21143	0.00332759	0.00673263	-3.0829	19.340685069843076	19.16686443444161	19.446789520828336	19.326585837318383	18.985655683115585	19.12434821989069	19.108173031277055	19.065676109397003
Patient_vs_Control	P11021	HSPA5	-0.169254	16.46967897281411	-14.2713	9.470977981109763e-7	1.1642606265667253e-5	5.9501419363060695	16.558495208685198	16.551516082280145	16.553996788178097	16.55321495774214	16.366662128107574	16.391441284624502	16.397133037800295	16.38497229509491
Patient_vs_Control	P11047	LAMC1	-0.402508	20.130645359920752	-7.60112	8.364265009991902e-5	3.285371451419452e-4	0.9711610329000546	20.36799471737701	20.30850934215386	20.3286	20.32244698627931	19.770925221017748	19.984336495042555	20.033578809451217	19.928725900570317
Patient_vs_Control	P11117:Q9BZG2	ACP2:ACP4	-0.185741	20.841207346204335	-3.38565	0.010354114401420127	0.0179543	-4.30227	20.971052772208793	20.93828553473255	20.90493138587877	20.92204095685121	20.5851	20.800147677400577	20.859451192782597	20.748642169503672
Patient_vs_Control	P11137	MAP2	-0.307291	18.236585622542854	-8.64589	3.450091349642854e-5	1.6422794677374263e-4	1.9554022011630838	18.375	18.324829377033215	18.460568630056084	18.40050359084033	18.1521	18.071740287909655	18.027316833449618	18.080583594564825
Patient_vs_Control	P11142	HSPA8	0.0046246	20.08584295114869	0.14100083278884007	0.8915434290810947	0.9117717253711699	-8.23864	20.062128058658217	20.08168153468007	20.099864080534804	20.09044892442641	20.182620125473548	20.058072145714704	20.023929558619244	20.087999181082505
Patient_vs_Control	P11166	SLC2A1	0.15205895940630398	22.279841360243168	2.7403022437341416	0.026762660702602737	0.041236747932138676	-5.29911	22.224642893084308	22.32122815864744	22.081961431848335	22.187415038579974	22.26022487729827	22.36679055560308	22.43639367257328	22.360074254310646
Patient_vs_Control	P11171	EPB41	-0.286257	13.025442234925833	-16.3404	3.493389121646475e-7	6.236852656787912e-6	7.051751109669759	13.175248841543713	13.194606919227668	13.140143278042238	13.164284314231894	12.85202324405928	12.887657188981006	12.906319609223218	12.883254484097648
Patient_vs_Control	P11172	UMPS	0.1500222802015969	18.562820383740814	13.866032584684401	1.169807172534239e-6	1.3404570259576267e-5	5.716283948164531	18.48556174074191	18.493343590691964	18.484274700798483	18.48805694232772	18.64756783636003	18.63376277937447	18.63197960230093	18.638015877331014
Patient_vs_Control	P11177	PDHB	-0.326904	18.702034091789226	-6.80775	1.7525559344797926e-4	5.862191220142669e-4	0.15056764281499824	18.897448341687756	18.82185611164985	18.883607692275227	18.859031720406563	18.398995681521058	18.5909	18.6273	18.53718961822706
Patient_vs_Control	P11182	DBT	-0.169439	17.92869605350728	-6.66693	2.012067337455732e-4	6.547288635517716e-4	-0.00240468	18.029543494453392	17.999733740133284	18.01492289027797	18.009462383500033	17.77327566714159	17.869039493633817	17.890024949550625	17.843565809367526
Patient_vs_Control	P11216	PYGB	0.18892652102207208	20.751964583842028	7.477239885751895	9.349996698300745e-5	3.5559779764991127e-4	0.8474599073035307	20.661137968718936	20.719136079787965	20.59853067140915	20.651200573407912	20.828412283679185	20.841801699981108	20.866894194982137	20.848603198769823
Patient_vs_Control	P11233	RALA	0.0501485	17.99477645808165	0.7911937973573453	0.4528697606864719	0.5078094276002177	-7.9097	17.928010230334923	18.04246726862559	17.931535262341423	17.9768	18.201420637426484	17.94912202187192	17.90663735822116	18.02222277983869
Patient_vs_Control	P11234	RALB	-0.101491	16.207820721782905	-4.68336	0.0018196	0.0040336	-2.42626	16.246534435143843	16.288004950545158	16.239817085549113	16.259907833375838	16.209203166016064	16.135323916466714	16.12571871370078	16.15805567346572
Patient_vs_Control	P11274	BCR	0.0901896	17.638822280606313	4.169665149158953	0.00351578	0.00704314	-3.1425	17.585311185678908	17.6399	17.55713974062125	17.59252528533453	17.71956066973531	17.66463419869031	17.66597304234259	17.685500367440692
Patient_vs_Control	P11279	LAMP1	-0.13682	15.09631893012304	-2.20813	0.060071	0.0847447	-6.12095	15.12943759730534	15.280039079675207	15.083194537344887	15.16624389211551	15.179882445716434	14.959508870339588	14.940445658811964	15.031799359675382
Patient_vs_Control	P11310	ACADM	-0.311372	17.249769122476245	-5.40315	7.710326719566252e-4	0.00198452	-1.4854	17.444601546834825	17.402696046624502	17.381207892895034	17.393314280542302	16.921498194962666	17.15008228675581	17.21059916189913	17.094153569295674
Patient_vs_Control	P11362:P21802	FGFR1:FGFR2	0.19010383671909992	13.387568673849154	3.684162627631528	0.00679174	0.012498310630824502	-3.85213	13.262947850958149	13.231355686816457	13.36879036353645	13.306973120647363	13.615006726626545	13.4504	13.384758598127933	13.480351246048938
Patient_vs_Control	P11387:Q969P6	TOP1:TOP1MT	0.1897755436733597	21.194	8.218560583505651	4.900943151599528e-5	2.164953835025998e-4	1.5650933116137988	21.094715584646675	21.045866876634985	21.150995018510848	21.104995305035573	21.310155438745703	21.291094938295437	21.267391668356453	21.287032914123905
Patient_vs_Control	P11388	TOP2A	0.9866183861701678	23.191462202328477	33.927953890426565	1.4769909403817378e-9	2.201017927891316e-7	12.913978070660402	22.68005609040628	22.73047522444652	22.680910176606588	22.701170545514177	23.763560426005498	23.65395360473767	23.635744675581435	23.685826875329656
Patient_vs_Control	P11413	G6PD	-0.133298	14.868567788481592	-1.75102	0.12012645259199324	0.15677629255169517	-6.79382	14.885975751571028	15.035189641510488	14.877279587433224	14.942422376296928	15.015915717020276	14.71615499283719	14.67039218508361	14.805212056099982
Patient_vs_Control	P11441	UBL4A	0.0403208	16.43584827449048	1.5779778150483426	0.15529918726476843	0.19615891115850875	-7.03224	16.39996942509514	16.441443326191344	16.402836157614473	16.418502627077608	16.524516813486976	16.42960943639842	16.413064239112938	16.456844170946926
Patient_vs_Control	P11498	PC	0.3683217828677847	20.6689	7.2695668127035455	1.1307295504395245e-4	4.140715735862291e-4	0.6364949320533295	20.511590826072624	20.55802309032584	20.399181641160546	20.47011060566781	20.73220334376354	20.879537322241234	20.944721233536164	20.855731395157022
Patient_vs_Control	P11532	DMD	-0.372162	14.469199062703458	-6.66154	2.022811342353574e-4	6.576388433600088e-4	-0.00830272	14.617695514050263	14.64871484620088	14.687003180588544	14.66770622413311	14.449111314544886	14.230817059795845	14.169816519509409	14.28272784280473
Patient_vs_Control	P11586	MTHFD1	0.0522862	20.484505965623427	2.009585206017949	0.0812959	0.11081248103894478	-6.41921	20.442601411780256	20.488518389651176	20.44150827842869	20.46082346108454	20.579205969666805	20.483490033709568	20.468261622271093	20.511638558395283
Patient_vs_Control	P11717	IGF2R	0.0478383	22.43670669090611	3.5644390085871045	0.00803124	0.014455	-4.03153	22.406829818347777	22.420363005846117	22.40992014579013	22.41403713931209	22.48666228973809	22.450967072631677	22.444	22.460865912055503
Patient_vs_Control	P11766	ADH5	-0.0797297	15.608254845328709	-4.17281	0.00350123	0.00702362	-3.13801	15.652292696755373	15.688211036054932	15.608524981888667	15.643450057649687	15.548698751611065	15.567946217361468	15.587102320378143	15.569812700930342
Patient_vs_Control	P11802	CDK4	-0.034078	18.02825134996418	-3.15583	0.014441555908490195	0.0239989	-4.65453	18.047418566874335	18.04898691813039	18.04044711662211	18.04430883312407	18.001706511271927	18.013645895837225	18.018146003371815	18.01135095448156
Patient_vs_Control	P11908	PRPS2	0.12795277440359243	15.979579170894741	5.65088	5.832820444757353e-4	0.00157373	-1.17827	15.904730734256738	15.9577	15.88447842357257	15.915521739651574	16.09016357554601	16.021442902719293	16.017632055386112	16.044983698734733
Patient_vs_Control	P11940:Q4VXU2:Q9H361:Q96DU9	PABPC1:PABPC1L:PABPC3:PABPC5	0.00464093	18.369120125642628	0.23297118949320292	0.82195	0.849884	-8.21929	18.362393764166907	18.324307631666745	18.40875370248468	18.37174354853558	18.39223602544665	18.37193505378795	18.351658512493017	18.369932766559486
Patient_vs_Control	P12004	PCNA	0.3851800210246594	19.857397050984275	4.795231404948915	0.0015846	0.00360909	-2.27522	19.610308328120297	19.654815338903315	19.71123945923233	19.68286503563184	20.29069793451983	19.974223599881185	19.885622201701405	20.049404509883992
Patient_vs_Control	P12074:H0YIV9	COX6A1:NA	-0.0892732	10.845047735363245	-3.06766	0.016435957393964983	0.0268431	-4.79068	10.907714322909602	10.85631132255894	10.907935926311742	10.886775781707748	10.721951008496196	10.83130079091531	10.849074185860584	10.799318544145835
Patient_vs_Control	P12081	HARS1	0.126539	21.09168308892863	6.385228060135805	2.6698059862228303e-4	8.274585446264478e-4	-0.315475	21.018193701998463	21.057990941134893	21.008298325344388	21.029171122258347	21.19908417700641	21.13575072419198	21.12903017660567	21.15594554288888
Patient_vs_Control	P12107	COL11A1	-0.712885	15.837548595458843	-5.15697	0.00102579	0.002511	-1.79898	16.109190223015545	16.05895889122522	16.37573840727024	16.23207596448724	15.859483112003243	15.382191734741744	15.206737632525996	15.47601279840151
Patient_vs_Control	P12109	COL6A1	0.1265693398258989	22.03836417675947	3.0372482830945264	0.017189543660516435	0.027948797107346025	-4.83775	21.974218658880417	21.861426470103567	22.079822128166008	21.984850770236072	22.109086968621696	22.118475227278303	22.081370719509597	22.097662471280092
Patient_vs_Control	P12110	COL6A2	0.20767572492243858	20.70692785579222	5.977900804776791	4.084897089229344e-4	0.00116561	-0.785459	20.607878947021707	20.50868314171045	20.686330710771756	20.60946717382009	20.792666312656756	20.832554567611133	20.810364118239033	20.807477874506844
Patient_vs_Control	P12111	COL6A3	0.5645886277822392	26.968755193366224	10.359953635166447	9.642681099656968e-6	6.303568253329917e-5	3.3735706694984433	26.68257074166852	26.538128914226892	26.82505589837975	26.700087963625265	27.27296062606156	27.269083448488253	27.216318983103765	27.2458
Patient_vs_Control	P12235	SLC25A4	-0.509479	16.850458306497227	-6.02854	3.870326770940071e-4	0.00111837	-0.725887	17.163483115464878	17.078222294751015	17.090053298750842	17.08903311800104	16.339490259718293	16.68272667411559	16.765635770171706	16.59502192100446
Patient_vs_Control	P12236	SLC25A6	-0.221965	15.618171168707542	-12.6662	2.2648008094271716e-6	2.1631103783980697e-5	4.983700021793563	15.734291475272748	15.691955243316274	15.759729063020474	15.730639173951424	15.485718014648096	15.520387747804271	15.516741656734954	15.5059
Patient_vs_Control	P12270	TPR	-0.123346	20.062618068424563	-6.09634	3.602327667696508e-4	0.00105597	-0.646635	20.11321795545617	20.11010718569451	20.144862559811468	20.128975590789235	20.050241499409516	19.9875	19.965656757333345	20.000401060115653
Patient_vs_Control	P12277:P06732:P12532	CKB:CKM:CKMT1A	-0.279206	21.104459711015714	-4.56663	0.00210615	0.00455408	-2.58576	21.28320054042044	21.16200007239613	21.292497463326093	21.23855327233244	20.794851307469106	21.03343644573959	21.069	20.9621
Patient_vs_Control	P12429	ANXA3	-0.258399	15.273375327698842	-8.366	4.3346589588180376e-5	1.9635037045464832e-4	1.7015980107043145	15.422366044405678	15.409347889353402	15.38283167828344	15.395754527631476	15.056661607436158	15.17118951277363	15.204354001448763	15.144497360258184
Patient_vs_Control	P12694:F5H5P2	BCKDHA:NA	-0.174255	17.21720176922829	-3.68027	0.00682868	0.012553635430968605	-3.85794	17.33599247151233	17.264922282847703	17.318785385639398	17.297616446325126	16.99167166327003	17.18127206202268	17.21852533969048	17.128828502518566
Patient_vs_Control	P12931	SRC	-0.177578	16.022605122456127	-7.85262	6.700287800176148e-5	2.7625918417214135e-4	1.217549635869096	16.100884879942097	16.079375249947912	16.147924621635664	16.117391302926137	15.981197181512538	15.92398519583366	15.897433156431912	15.932649391419114
Patient_vs_Control	P12955	PEPD	0.0871994	15.526755593186925	4.797261692501031	0.00158065	0.00360235	-2.27249	15.473466439640346	15.504348775842724	15.470361670920642	15.484446662241108	15.612415979984124	15.553237597486346	15.54471098680411	15.5711
Patient_vs_Control	P12956	XRCC6	0.22822082124794818	21.26516496951635	7.095635048093998	1.3302028150013716e-4	4.710543625189144e-4	0.45625726307279457	21.13214876937378	21.12240044285955	21.190244853580115	21.15942416975607	21.463585721693573	21.356992642749443	21.31833251814879	21.37819063796948
Patient_vs_Control	P13010	XRCC5	0.032934279443672665	16.21814080457036	2.12026	0.0686879	0.095426	-6.25384	16.196466116019966	16.22992151479957	16.179348634018535	16.200958394556032	16.25667320835353	16.22273107901981	16.223451874004294	16.235575615791163
Patient_vs_Control	P13051	UNG	-0.453398	17.191309858698265	-7.25706	1.1438966303563698e-4	4.1791961830440897e-4	0.6236483737032419	17.450254481993305	17.285786650730206	17.51712469438093	17.41886978333354	16.826613212441725	17.031374030591103	17.04034110526511	16.960114910850194
Patient_vs_Control	P13056	NR2C1	-0.0657369	11.993470473916787	-1.58616	0.15344175033316645	0.19424959447517015	-7.02124	12.021576265415147	11.9171	12.129715294426992	12.037	11.98510981771138	11.971191309286231	11.92935361479823	11.956753285755411
Patient_vs_Control	P13073	COX4I1	-0.0393795	16.042907270771394	-0.685329	0.5135410016661126	0.5675611312495769	-7.99215	16.023532935961804	16.101154972074422	16.053980640502854	16.071719464135697	16.19429172343773	15.961650782363872	15.912525528786327	16.024402118908444
Patient_vs_Control	P13196	ALAS1	0.12366861437734045	16.540318279750828	2.0847696404456326	0.0725059	0.10019651002583378	-6.30714	16.44201173471237	16.42576550507495	16.551742335955645	16.494416314505663	16.764718473842652	16.55875918434185	16.484983037666506	16.60014965190699
Patient_vs_Control	P13284	IFI30	-0.405125	15.841390333891615	-6.6299	2.0872300564845318e-4	6.749758136603212e-4	-0.0430196	16.085815611645042	16.023220347569715	16.034319944119403	16.032456375822683	15.454838450729971	15.701535573654068	15.760656771745776	15.638279595846264
Patient_vs_Control	P13473	LAMP2	-0.266521	14.54789122000881	-7.93051	6.26271937039995e-5	2.607205065145977e-4	1.2925889987577825	14.661633494136852	14.735225925999668	14.644946991088537	14.682800322110271	14.49899208726653	14.378341515992952	14.364746999238086	14.416442424237577
Patient_vs_Control	P13489	RNH1	0.0605941	19.830090348814124	3.030048511325799	0.017373207072855636	0.028209730497218557	-4.8489	19.79359066875635	19.844703879349105	19.762878858211792	19.797999825719323	19.88630813789914	19.844452137992786	19.848854559136043	19.86193472344845
Patient_vs_Control	P13497	BMP1	-0.627365	17.5726	-9.7277	1.5083739402582433e-5	8.776212359972664e-5	2.8758059905165787	17.928299648077225	17.8067	17.93052663925762	17.87968492912236	17.07624658933795	17.33118442283922	17.371995506856763	17.256328422620776
Patient_vs_Control	P13498	CYBA	0.0022929	21.170859473982407	0.022519439460073478	0.9826149727806194	0.9868043640825309	-8.24959	21.225899283882903	21.31157820849073	21.00127497193275	21.140099627323625	20.919626692405913	21.22922292410066	21.361957213246686	21.17721687047598
Patient_vs_Control	P13591	NCAM1	1.2410785677571852	19.1168	10.943866363577404	6.513537330837392e-6	4.7798651837435305e-5	3.8099235754689946	18.520766018436778	18.179693433153627	18.769727179983416	18.515	19.639638728662668	19.822378890314138	19.76112838705658	19.7264
Patient_vs_Control	P13611	VCAN	-0.599679	25.951985987142656	-4.68236	0.00182186	0.0040374	-2.42762	26.338611628388268	26.129713032689857	26.30437207567001	26.234605311654725	25.273249718549977	25.794713751545466	25.892384952899224	25.648237425743712
Patient_vs_Control	P13612	ITGA4	-0.0518054	24.749061029199847	-1.63864	0.14200611691460688	0.18167735023103423	-6.94999	24.769124012980782	24.85929802884785	24.701672390512623	24.769760487969094	24.74621527530759	24.70147765663569	24.718851659373826	24.72608872197133
Patient_vs_Control	P13639	EEF2	0.21044266854708482	23.34714288885078	14.34858347017719	9.103065865470126e-7	1.1354307230535387e-5	5.993994891907452	23.248939609491934	23.229696791831405	23.248324377727577	23.24072543925802	23.421799604768033	23.464266266158855	23.47142525731473	23.45196576425567
Patient_vs_Control	P13645	KRT10	0.6241467922201593	32.08029349931255	2.6716439203918467	0.0296804	0.0451702	-5.40594	31.611616008719707	32.02514980123262	31.639878303858794	31.79623629899877	33.074907865063764	32.12929771338636	31.96455946461352	32.40070253862687
Patient_vs_Control	P13667	PDIA4	-0.305654	18.015476896076663	-15.1523	6.097685847142995e-7	8.834385328539315e-6	6.437104843025395	18.180181779555085	18.17097302865778	18.15773319644949	18.164326866464098	17.810171092785854	17.879084746981007	17.898550188283366	17.862794269436627
Patient_vs_Control	P13674	P4HA1	0.20094311572905355	20.42313650922174	3.7287477392282464	0.00638405	0.011834565032153774	-3.78574	20.359183798694794	20.28530835315837	20.331921225144725	20.31424642843097	20.363722217997974	20.581371607996417	20.62688371095392	20.522454731396763
Patient_vs_Control	P13716	ALAD	-0.0338988	13.883618253721234	-1.0904	0.3089786816528069	0.3634867622730459	-7.62525	13.91140211683308	13.96498088613046	13.834127661175073	13.891760020430318	13.816815169712564	13.871817325663446	13.909070598718095	13.868972251106843
Patient_vs_Control	P13726	F3	0.9317483378326727	27.461346798109815	12.38915244738744	2.659757717816942e-6	2.4276938569374136e-5	4.805247573836077	27.043749760143307	26.893053634786188	27.05631094189804	26.988776179946385	27.717554312725554	28.012	28.05548671563622	27.923837816718333
Patient_vs_Control	P13747	HLA-E	0.24203696590114987	16.214046895436212	4.391739617985806	0.00263195	0.00550674	-2.82833	16.055545994283104	16.099715439163493	16.11253738169834	16.104314834797627	16.50018401005658	16.28080458913843	16.22413305275988	16.335139861592257
Patient_vs_Control	P13796:P13797	LCP1:PLS3	0.14551335649106534	23.493621549075225	10.424050086853752	9.227514791486354e-6	6.075681966405171e-5	3.422526913563079	23.41746100852627	23.44578218229167	23.40035833034172	23.419857962159114	23.58059422729049	23.557590230501845	23.56009157156078	23.56723687992992
Patient_vs_Control	P13798	APEH	-0.160625	18.976625569897763	-8.57067	3.666089124531032e-5	1.7281977267479405e-4	1.8878699662945753	19.06486921476068	19.022086400889176	19.08345265343558	19.057344874493115	18.862446478146083	18.91310374441279	18.914575819408977	18.895125373635697
Patient_vs_Control	P13804	ETFA	-0.169295	19.989686634780348	-3.50192	0.00877298	0.015559943448962535	-4.12583	20.10680977980046	20.07636069918409	20.050263836876113	20.063901390510907	19.761725236443755	19.95081054510128	20.00237272695484	19.905248863371337
Patient_vs_Control	P13807:P54840	GYS1:GYS2	-0.0192015	18.82178854672069	-1.0136	0.34202679905397443	0.3972450591207446	-7.70498	18.825453060418972	18.796539103358935	18.86738691250519	18.836178087663317	18.839488639152737	18.8093	18.78902459573013	18.810941243617137
Patient_vs_Control	P13861	PRKAR2A	-0.137134	17.813713820610246	-10.2231	1.060136030565501e-5	6.78449894407475e-5	3.268129193034884	17.882267192329888	17.906870183231057	17.85975569669584	17.880229776338503	17.7444	17.741222914628885	17.74893742980366	17.74600855177825
Patient_vs_Control	P13929	ENO3	-0.693897	14.726245376421456	-8.18555	5.0387901947418964e-5	2.2137933815887683e-4	1.5342589276983816	15.12792101363612	15.127176873840892	14.986290582166257	15.051386772335238	14.136168909322372	14.448398841521692	14.551197976029156	14.38142204251993
Patient_vs_Control	P13984	GTF2F2	0.0597822	19.29599113283528	3.271220706689271	0.012209433523718921	0.020719560362244024	-4.47712	19.25604204190855	19.258875115362898	19.27960046584376	19.269882434275477	19.370478862424218	19.312754266475395	19.294709698063897	19.325586178328045
Patient_vs_Control	P13987:E9PNW4	CD59:NA	-0.0632319	10.119406985396946	-1.58547	0.15359869835614282	0.19441457711848759	-7.02217	10.166565686115035	10.231292602663627	10.066831371737536	10.139402038879323	10.016661286979856	10.097104040987077	10.146728663359069	10.09067019245405
Patient_vs_Control	P13994	YJU2B	0.0492826	13.005633071878194	2.3712918145269106	0.0468314	0.067769	-5.8713	12.977060241984596	13.03172617449368	12.937186877943018	12.97799381100034	13.045990827579574	13.01663767239881	13.026433500658287	13.032035468967235
Patient_vs_Control	P13995	MTHFD2	0.1212008767339281	15.549663091341651	2.99399	0.018324503667593316	0.0295572	-4.90478	15.51344758076251	15.42657376259944	15.52964995545736	15.48657931307944	15.504704856880744	15.65479639608556	15.673375120562634	15.608177745305522
Patient_vs_Control	P14136	GFAP	-0.292618	11.81660663513765	-2.49705	0.038669584089939535	0.057055	-5.67705	12.027685169069295	12.12625486811736	11.76892720779487	11.928794693019224	11.379369606587876	11.736287140050711	11.889236547374487	11.676297849087373
Patient_vs_Control	P14174	MIF	-0.313475	9.318623306192817	-11.2743	5.2595970159251144e-6	4.0469523087760995e-5	4.04768	9.45817	9.46337	9.498108532296948	9.481794821783614	9.238078067926434	9.1394	9.10867	9.16139
Patient_vs_Control	P14209	CD99	-0.0214346	17.121821158558706	-0.124597	0.9040827777523686	0.9222228629367779	-8.2411	17.060546257171836	16.784728796397115	17.500518849724124	17.184359906234143	17.4398	17.064157596283607	16.841849396468252	17.09860867201928
Patient_vs_Control	P14210	HGF	0.2839344632325389	15.1695	7.922862058117033	6.304220003863745e-5	2.617021857203699e-4	1.2852500110169398	15.028375778698395	14.930021447784936	15.116253709735057	15.03538214755573	15.310739277336742	15.328154967764936	15.29884645499958	15.308030236603022
Patient_vs_Control	P14314	PRKCSH	0.11345710982396184	17.739185629303048	3.989198998318263	0.00447254	0.00868346	-3.40274	17.66406698640374	17.69831883399701	17.680499439590662	17.686943037572867	17.87652369196634	17.767294230085987	17.7434	17.79639159580408
[truncated: 5,851 more rows]

## Sheet: Sample Z-scores
Uniprot_Accession	Gene_Name	C4_1	C4_2	C4_3	C4l_4	II:3_1	II:3_2	II:3_3	II:3_4
[truncated: 7,302 more rows]
