# Supplementary material for: A severe neurodevelopmental syndrome linked to a South Asian founder variant in the UFMylation adaptor CDK5RAP3
Source: Acta Neuropathol. 2026 Apr 27;151(1):48. doi: 10.1007/s00401-026-03017-2 (PMC13121207; doi:10.1007/s00401-026-03017-2)
Supplement: Supplementary file 3 — Supplementary file3 (XLSX 110 KB) [file 401_2026_3017_MOESM3_ESM.xlsx]

## Sheet: Upregulated proteins
GroupID	Category	Term	Description	LogP	Log(q-value)	Genes	Symbols	InTerm_InList	≥ 3 Unambiguously mapped proteins	Q-value < 0.05
1_Summary	GO Cellular Components	GO:0042555	MCM complex	-12.7177	-8.38577	4171,4172,4173,4174,4175,4176,84515,983,1163,7153,7298,9918,10051,10403,10592,10714,54821,54908,57405,79003,79861,121441,140609,249,3832,9319,24137,55605,83858,89795,89941,285643,338322,3148,3297,3159,4521,6240,22890,29089,29128,55183,1854,397,55190,55752,170685,23210,91298,5570	MCM2,MCM3,MCM4,MCM5,MCM6,MCM7,MCM8,CDK1,CKS1B,TOP2A,TYMS,NCAPD2,SMC4,NDC80,SMC2,POLD3,ERCC6L,SPDL1,SPC25,MIS12,TUBAL3,NEDD1,NEK7,ALPL,KIF11,TRIP13,KIF4A,KIF21A,ATAD3B,NAV3,RHOT2,KIF4B,NLRP10,HMGB2,HSF1,HMGA1,NUDT1,RRM1,ZBTB1,UBE2T,UHRF1,RIF1,DUT,ARHGDIB,NUDT11,SEPTIN11,NUDT10,JMJD6,RLIG1,PKIB	50/-	TRUE	TRUE
1_Member	GO Cellular Components	GO:0042555	MCM complex	-12.7177	-8.38577	4171,4172,4173,4174,4175,4176,84515	MCM2,MCM3,MCM4,MCM5,MCM6,MCM7,MCM8	7/11	TRUE	TRUE
1_Member	Reactome Gene Sets	R-HSA-176974	Unwinding of DNA	-12.34	-8.38577	4171,4172,4173,4174,4175,4176,84515	MCM2,MCM3,MCM4,MCM5,MCM6,MCM7,MCM8	7/12	TRUE	TRUE
1_Member	Reactome Gene Sets	R-HSA-69278	Cell Cycle, Mitotic	-11.2908	-7.49034	983,1163,4171,4172,4173,4174,4175,4176,7153,7298,9918,10051,10403,10592,10714,54821,54908,57405,79003,79861,84515,121441,140609	CDK1,CKS1B,MCM2,MCM3,MCM4,MCM5,MCM6,MCM7,TOP2A,TYMS,NCAPD2,SMC4,NDC80,SMC2,POLD3,ERCC6L,SPDL1,SPC25,MIS12,TUBAL3,MCM8,NEDD1,NEK7	23/554	TRUE	TRUE
1_Member	Reactome Gene Sets	R-HSA-69190	DNA strand elongation	-10.4486	-6.76794	4171,4172,4173,4174,4175,4176,10714,84515	MCM2,MCM3,MCM4,MCM5,MCM6,MCM7,POLD3,MCM8	8/32	TRUE	TRUE
1_Member	GO Cellular Components	GO:0071162	CMG complex	-10.3923	-6.76794	4171,4172,4173,4174,4175,4176	MCM2,MCM3,MCM4,MCM5,MCM6,MCM7	6/11	TRUE	TRUE
1_Member	GO Biological Processes	GO:0000727	double-strand break repair via break-induced replication	-10.0937	-6.5943	4171,4172,4173,4174,4175,4176	MCM2,MCM3,MCM4,MCM5,MCM6,MCM7	6/12	TRUE	TRUE
1_Member	GO Molecular Functions	GO:0017116	single-stranded DNA helicase activity	-9.87673	-6.42847	4171,4172,4173,4174,4175,4176,84515	MCM2,MCM3,MCM4,MCM5,MCM6,MCM7,MCM8	7/23	TRUE	TRUE
1_Member	GO Cellular Components	GO:0031261	DNA replication preinitiation complex	-9.82732	-6.42482	4171,4172,4173,4174,4175,4176	MCM2,MCM3,MCM4,MCM5,MCM6,MCM7	6/13	TRUE	TRUE
1_Member	Reactome Gene Sets	R-HSA-1640170	Cell Cycle	-9.47736	-6.15404	983,1163,4171,4172,4173,4174,4175,4176,7153,7298,9918,10051,10403,10592,10714,54821,54908,57405,79003,79861,84515,121441,140609	CDK1,CKS1B,MCM2,MCM3,MCM4,MCM5,MCM6,MCM7,TOP2A,TYMS,NCAPD2,SMC4,NDC80,SMC2,POLD3,ERCC6L,SPDL1,SPC25,MIS12,TUBAL3,MCM8,NEDD1,NEK7	23/684	TRUE	TRUE
1_Member	GO Molecular Functions	GO:0140657	ATP-dependent activity	-9.22002	-5.96399	249,3832,4171,4172,4173,4174,4175,4176,7153,9319,10051,10592,24137,54821,55605,83858,84515,89795,89941,285643,338322	ALPL,KIF11,MCM2,MCM3,MCM4,MCM5,MCM6,MCM7,TOP2A,TRIP13,SMC4,SMC2,KIF4A,ERCC6L,KIF21A,ATAD3B,MCM8,NAV3,RHOT2,KIF4B,NLRP10	21/583	TRUE	TRUE
1_Member	GO Biological Processes	GO:0030174	regulation of DNA-templated DNA replication initiation	-9.16568	-5.96399	4171,4172,4173,4174,4175,4176	MCM2,MCM3,MCM4,MCM5,MCM6,MCM7	6/16	TRUE	TRUE
1_Member	GO Molecular Functions	GO:0003697	single-stranded DNA binding	-9.07355	-5.90149	3148,3297,4171,4172,4173,4174,4175,4176,10051,10592,84515	HMGB2,HSF1,MCM2,MCM3,MCM4,MCM5,MCM6,MCM7,SMC4,SMC2,MCM8	11/123	TRUE	TRUE
1_Member	GO Biological Processes	GO:0006281	DNA repair	-9.03621	-5.88898	983,3148,3159,3297,4171,4172,4173,4174,4175,4176,4521,6240,9319,10714,22890,29089,29128,54821,55183,84515	CDK1,HMGB2,HMGA1,HSF1,MCM2,MCM3,MCM4,MCM5,MCM6,MCM7,NUDT1,RRM1,TRIP13,POLD3,ZBTB1,UBE2T,UHRF1,ERCC6L,RIF1,MCM8	20/538	TRUE	TRUE
1_Member	Reactome Gene Sets	R-HSA-68962	Activation of the pre-replicative complex	-8.66047	-5.559	4171,4172,4173,4174,4175,4176,84515	MCM2,MCM3,MCM4,MCM5,MCM6,MCM7,MCM8	7/33	TRUE	TRUE
1_Member	GO Molecular Functions	GO:0016887	ATP hydrolysis activity	-8.59563	-5.52065	249,4171,4172,4173,4174,4175,4176,9319,10051,10592,54821,55605,83858,84515,89795,89941,338322	ALPL,MCM2,MCM3,MCM4,MCM5,MCM6,MCM7,TRIP13,SMC4,SMC2,ERCC6L,KIF21A,ATAD3B,MCM8,NAV3,RHOT2,NLRP10	17/401	TRUE	TRUE
1_Member	GO Biological Processes	GO:0006259	DNA metabolic process	-8.58073	-5.52065	983,1854,3148,3159,3297,4171,4172,4173,4174,4175,4176,4521,6240,7153,7298,9319,10714,22890,29089,29128,54821,55183,84515	CDK1,DUT,HMGB2,HMGA1,HSF1,MCM2,MCM3,MCM4,MCM5,MCM6,MCM7,NUDT1,RRM1,TOP2A,TYMS,TRIP13,POLD3,ZBTB1,UBE2T,UHRF1,ERCC6L,RIF1,MCM8	23/762	TRUE	TRUE
1_Member	Reactome Gene Sets	R-HSA-453279	Mitotic G1 phase and G1/S transition	-8.50665	-5.46587	983,1163,4171,4172,4173,4174,4175,4176,7153,7298,84515	CDK1,CKS1B,MCM2,MCM3,MCM4,MCM5,MCM6,MCM7,TOP2A,TYMS,MCM8	11/139	TRUE	TRUE
1_Member	GO Cellular Components	GO:0098687	chromosomal region	-8.40437	-5.38208	983,3297,4171,4172,4173,4174,4175,4176,7153,9918,10051,10403,54821,54908,55183,57405,79003	CDK1,HSF1,MCM2,MCM3,MCM4,MCM5,MCM6,MCM7,TOP2A,NCAPD2,SMC4,NDC80,ERCC6L,SPDL1,RIF1,SPC25,MIS12	17/413	TRUE	TRUE
1_Member	KEGG Pathway	hsa03030	DNA replication	-8.37701	-5.37245	4171,4172,4173,4174,4175,4176,10714	MCM2,MCM3,MCM4,MCM5,MCM6,MCM7,POLD3	7/36	TRUE	TRUE
1_Member	Reactome Gene Sets	R-HSA-176187	Activation of ATR in response to replication stress	-8.28843	-5.31729	4171,4172,4173,4174,4175,4176,84515	MCM2,MCM3,MCM4,MCM5,MCM6,MCM7,MCM8	7/37	TRUE	TRUE
1_Member	GO Molecular Functions	GO:0016462	pyrophosphatase activity	-8.22516	-5.28358	249,397,1854,4171,4172,4173,4174,4175,4176,4521,9319,10051,10592,54821,55190,55605,55752,83858,84515,89795,89941,170685,338322	ALPL,ARHGDIB,DUT,MCM2,MCM3,MCM4,MCM5,MCM6,MCM7,NUDT1,TRIP13,SMC4,SMC2,ERCC6L,NUDT11,KIF21A,SEPTIN11,ATAD3B,MCM8,NAV3,RHOT2,NUDT10,NLRP10	23/796	TRUE	TRUE
1_Member	GO Molecular Functions	GO:0016817	hydrolase activity, acting on acid anhydrides	-8.19472	-5.28358	249,397,1854,4171,4172,4173,4174,4175,4176,4521,9319,10051,10592,54821,55190,55605,55752,83858,84515,89795,89941,170685,338322	ALPL,ARHGDIB,DUT,MCM2,MCM3,MCM4,MCM5,MCM6,MCM7,NUDT1,TRIP13,SMC4,SMC2,ERCC6L,NUDT11,KIF21A,SEPTIN11,ATAD3B,MCM8,NAV3,RHOT2,NUDT10,NLRP10	23/799	TRUE	TRUE
1_Member	GO Molecular Functions	GO:0016818	hydrolase activity, acting on acid anhydrides, in phosphorus-containing anhydrides	-8.19472	-5.28358	249,397,1854,4171,4172,4173,4174,4175,4176,4521,9319,10051,10592,54821,55190,55605,55752,83858,84515,89795,89941,170685,338322	ALPL,ARHGDIB,DUT,MCM2,MCM3,MCM4,MCM5,MCM6,MCM7,NUDT1,TRIP13,SMC4,SMC2,ERCC6L,NUDT11,KIF21A,SEPTIN11,ATAD3B,MCM8,NAV3,RHOT2,NUDT10,NLRP10	23/799	TRUE	TRUE
1_Member	Reactome Gene Sets	R-HSA-69206	G1/S Transition	-7.96523	-5.07582	983,1163,4171,4172,4173,4174,4175,4176,7298,84515	CDK1,CKS1B,MCM2,MCM3,MCM4,MCM5,MCM6,MCM7,TYMS,MCM8	10/121	TRUE	TRUE
1_Member	GO Biological Processes	GO:1902969	mitotic DNA replication	-7.58533	-4.75103	983,4171,4172,4173,4175	CDK1,MCM2,MCM3,MCM4,MCM6	5/14	TRUE	TRUE
1_Member	GO Biological Processes	GO:0006270	DNA replication initiation	-7.52261	-4.71117	4171,4172,4173,4174,4175,4176	MCM2,MCM3,MCM4,MCM5,MCM6,MCM7	6/28	TRUE	TRUE
1_Member	GO Biological Processes	GO:0006261	DNA-templated DNA replication	-7.21245	-4.46317	983,4171,4172,4173,4174,4175,4176,6240,10714,84515	CDK1,MCM2,MCM3,MCM4,MCM5,MCM6,MCM7,RRM1,POLD3,MCM8	10/145	TRUE	TRUE
1_Member	GO Molecular Functions	GO:0120543	macromolecular conformation isomerase activity	-7.08029	-4.34989	3832,4171,4172,4173,4174,4175,4176,7153,24137,54821,55605,84515,285643	KIF11,MCM2,MCM3,MCM4,MCM5,MCM6,MCM7,TOP2A,KIF4A,ERCC6L,KIF21A,MCM8,KIF4B	13/284	TRUE	TRUE
1_Member	Reactome Gene Sets	R-HSA-69620	Cell Cycle Checkpoints	-7.06259	-4.34132	983,4171,4172,4173,4174,4175,4176,10403,54821,54908,57405,79003,84515	CDK1,MCM2,MCM3,MCM4,MCM5,MCM6,MCM7,NDC80,ERCC6L,SPDL1,SPC25,MIS12,MCM8	13/285	TRUE	TRUE
1_Member	Reactome Gene Sets	R-HSA-68949	Orc1 removal from chromatin	-6.87526	-4.18033	4171,4172,4173,4174,4175,4176,84515	MCM2,MCM3,MCM4,MCM5,MCM6,MCM7,MCM8	7/58	TRUE	TRUE
1_Member	GO Molecular Functions	GO:0008094	ATP-dependent activity, acting on DNA	-6.85827	-4.17383	4171,4172,4173,4174,4175,4176,7153,54821,84515	MCM2,MCM3,MCM4,MCM5,MCM6,MCM7,TOP2A,ERCC6L,MCM8	9/120	TRUE	TRUE
1_Member	GO Molecular Functions	GO:0003678	DNA helicase activity	-6.77151	-4.1014	4171,4172,4173,4174,4175,4176,84515	MCM2,MCM3,MCM4,MCM5,MCM6,MCM7,MCM8	7/60	TRUE	TRUE
1_Member	GO Biological Processes	GO:0006260	DNA replication	-6.67708	-4.03046	983,1854,4171,4172,4173,4174,4175,4176,6240,10714,84515	CDK1,DUT,MCM2,MCM3,MCM4,MCM5,MCM6,MCM7,RRM1,POLD3,MCM8	11/209	TRUE	TRUE
1_Member	GO Biological Processes	GO:0090329	regulation of DNA-templated DNA replication	-6.35034	-3.74232	4171,4172,4173,4174,4175,4176	MCM2,MCM3,MCM4,MCM5,MCM6,MCM7	6/43	TRUE	TRUE
1_Member	GO Molecular Functions	GO:0017111	ribonucleoside triphosphate phosphatase activity	-6.13018	-3.55155	249,397,4171,4172,4173,4174,4175,4176,9319,10051,10592,54821,55605,55752,83858,84515,89795,89941,338322	ALPL,ARHGDIB,MCM2,MCM3,MCM4,MCM5,MCM6,MCM7,TRIP13,SMC4,SMC2,ERCC6L,KIF21A,SEPTIN11,ATAD3B,MCM8,NAV3,RHOT2,NLRP10	19/736	TRUE	TRUE
1_Member	GO Cellular Components	GO:0000228	nuclear chromosome	-6.11604	-3.55155	4171,4172,4173,4174,4175,4176,7153,9918,10051,10592,10714	MCM2,MCM3,MCM4,MCM5,MCM6,MCM7,TOP2A,NCAPD2,SMC4,SMC2,POLD3	11/238	TRUE	TRUE
1_Member	Reactome Gene Sets	R-HSA-69239	Synthesis of DNA	-6.1152	-3.55155	4171,4172,4173,4174,4175,4176,10714,84515	MCM2,MCM3,MCM4,MCM5,MCM6,MCM7,POLD3,MCM8	8/108	TRUE	TRUE
1_Member	GO Biological Processes	GO:0033260	nuclear DNA replication	-6.09745	-3.54005	983,4171,4172,4173,4175	CDK1,MCM2,MCM3,MCM4,MCM6	5/26	TRUE	TRUE
1_Member	Reactome Gene Sets	R-HSA-69242	S Phase	-6.03479	-3.48962	1163,4171,4172,4173,4174,4175,4176,10714,84515	CKS1B,MCM2,MCM3,MCM4,MCM5,MCM6,MCM7,POLD3,MCM8	9/150	TRUE	TRUE
1_Member	GO Biological Processes	GO:0044786	cell cycle DNA replication	-6.0109	-3.47172	983,4171,4172,4173,4175	CDK1,MCM2,MCM3,MCM4,MCM6	5/27	TRUE	TRUE
1_Member	Reactome Gene Sets	R-HSA-69052	Switching of origins to a post-replicative state	-5.94335	-3.41591	4171,4172,4173,4174,4175,4176,84515	MCM2,MCM3,MCM4,MCM5,MCM6,MCM7,MCM8	7/79	TRUE	TRUE
1_Member	GO Biological Processes	GO:1902292	cell cycle DNA replication initiation	-5.91286	-3.40245	4171,4172,4173	MCM2,MCM3,MCM4	3/4	TRUE	TRUE
1_Member	GO Biological Processes	GO:1902315	nuclear cell cycle DNA replication initiation	-5.91286	-3.40245	4171,4172,4173	MCM2,MCM3,MCM4	3/4	TRUE	TRUE
1_Member	GO Biological Processes	GO:1902975	mitotic DNA replication initiation	-5.91286	-3.40245	4171,4172,4173	MCM2,MCM3,MCM4	3/4	TRUE	TRUE
1_Member	KEGG Pathway	hsa04110	Cell cycle	-5.84645	-3.34158	983,4171,4172,4173,4174,4175,4176,9319,10403	CDK1,MCM2,MCM3,MCM4,MCM5,MCM6,MCM7,TRIP13,NDC80	9/158	TRUE	TRUE
1_Member	GO Molecular Functions	GO:0140097	catalytic activity, acting on DNA	-5.82297	-3.32355	3159,4171,4172,4173,4174,4175,4176,7153,10714,54821,84515	HMGA1,MCM2,MCM3,MCM4,MCM5,MCM6,MCM7,TOP2A,POLD3,ERCC6L,MCM8	11/255	TRUE	TRUE
1_Member	GO Molecular Functions	GO:0120545	nucleic acid conformation isomerase activity	-5.75631	-3.2623	4171,4172,4173,4174,4175,4176,7153,54821,84515	MCM2,MCM3,MCM4,MCM5,MCM6,MCM7,TOP2A,ERCC6L,MCM8	9/162	TRUE	TRUE
1_Member	GO Biological Processes	GO:0006310	DNA recombination	-5.64531	-3.15662	3148,4171,4172,4173,4174,4175,4176,7153,9319,29128,84515	HMGB2,MCM2,MCM3,MCM4,MCM5,MCM6,MCM7,TOP2A,TRIP13,UHRF1,MCM8	11/266	TRUE	TRUE
1_Member	GO Biological Processes	GO:0006271	DNA strand elongation involved in DNA replication	-5.57821	-3.09479	4172,4173,4176,10714	MCM3,MCM4,MCM7,POLD3	4/15	TRUE	TRUE
1_Member	GO Biological Processes	GO:0000724	double-strand break repair via homologous recombination	-5.33673	-2.89327	4171,4172,4173,4174,4175,4176,29128,84515	MCM2,MCM3,MCM4,MCM5,MCM6,MCM7,UHRF1,MCM8	8/137	TRUE	TRUE
1_Member	GO Biological Processes	GO:0006302	double-strand break repair	-5.25842	-2.81971	3148,4171,4172,4173,4174,4175,4176,9319,29128,84515	HMGB2,MCM2,MCM3,MCM4,MCM5,MCM6,MCM7,TRIP13,UHRF1,MCM8	10/237	TRUE	TRUE
1_Member	GO Biological Processes	GO:0000725	recombinational repair	-5.19898	-2.77875	4171,4172,4173,4174,4175,4176,29128,84515	MCM2,MCM3,MCM4,MCM5,MCM6,MCM7,UHRF1,MCM8	8/143	TRUE	TRUE
1_Member	GO Molecular Functions	GO:0004386	helicase activity	-5.06767	-2.68636	4171,4172,4173,4174,4175,4176,54821,84515	MCM2,MCM3,MCM4,MCM5,MCM6,MCM7,ERCC6L,MCM8	8/149	TRUE	TRUE
1_Member	GO Biological Processes	GO:0022616	DNA strand elongation	-5.0396	-2.67419	4172,4173,4176,10714	MCM3,MCM4,MCM7,POLD3	4/20	TRUE	TRUE
1_Member	GO Molecular Functions	GO:0016853	isomerase activity	-5.02862	-2.66752	3832,4171,4172,4173,4174,4175,4176,7153,24137,54821,55605,84515,285643	KIF11,MCM2,MCM3,MCM4,MCM5,MCM6,MCM7,TOP2A,KIF4A,ERCC6L,KIF21A,MCM8,KIF4B	13/434	TRUE	TRUE
1_Member	Reactome Gene Sets	R-HSA-69481	G2/M Checkpoints	-4.92191	-2.57632	983,4171,4172,4173,4174,4175,4176,84515	CDK1,MCM2,MCM3,MCM4,MCM5,MCM6,MCM7,MCM8	8/156	TRUE	TRUE
1_Member	GO Biological Processes	GO:0006275	regulation of DNA replication	-4.70944	-2.41414	983,4171,4172,4173,4174,4175,4176	CDK1,MCM2,MCM3,MCM4,MCM5,MCM6,MCM7	7/121	TRUE	TRUE
1_Member	GO Cellular Components	GO:0000781	chromosome, telomeric region	-4.52615	-2.26667	983,4171,4172,4173,4174,4175,4176,55183	CDK1,MCM2,MCM3,MCM4,MCM5,MCM6,MCM7,RIF1	8/177	TRUE	TRUE
1_Member	Reactome Gene Sets	R-HSA-68867	Assembly of the pre-replicative complex	-4.46564	-2.21848	4171,4172,4173,4174,4175,4176,84515	MCM2,MCM3,MCM4,MCM5,MCM6,MCM7,MCM8	7/132	TRUE	TRUE
1_Member	Reactome Gene Sets	R-HSA-69306	DNA Replication	-4.40622	-2.16807	4171,4172,4173,4174,4175,4176,10714,84515	MCM2,MCM3,MCM4,MCM5,MCM6,MCM7,POLD3,MCM8	8/184	TRUE	TRUE
1_Member	Reactome Gene Sets	R-HSA-69002	DNA Replication Pre-Initiation	-4.13126	-1.95665	4171,4172,4173,4174,4175,4176,84515	MCM2,MCM3,MCM4,MCM5,MCM6,MCM7,MCM8	7/149	TRUE	TRUE
1_Member	GO Molecular Functions	GO:0043138	3'-5' DNA helicase activity	-3.88086	-1.77061	4171,4174,4175	MCM2,MCM5,MCM6	3/15	TRUE	TRUE
1_Member	GO Molecular Functions	GO:0140640	catalytic activity, acting on a nucleic acid	-3.207	-1.23586	3159,4171,4172,4173,4174,4175,4176,7153,10714,23210,54821,84515,91298	HMGA1,MCM2,MCM3,MCM4,MCM5,MCM6,MCM7,TOP2A,POLD3,JMJD6,ERCC6L,MCM8,RLIG1	13/661	TRUE	FALSE
1_Member	GO Biological Processes	GO:0051052	regulation of DNA metabolic process	-3.1971	-1.23381	983,3297,4171,4172,4173,4174,4175,4176,5570,55183,140609	CDK1,HSF1,MCM2,MCM3,MCM4,MCM5,MCM6,MCM7,PKIB,RIF1,NEK7	11/498	TRUE	FALSE
1_Member	GO Cellular Components	GO:0032993	protein-DNA complex	-2.86172	-0.96707	4171,4172,4173,4174,4175,4176,10714	MCM2,MCM3,MCM4,MCM5,MCM6,MCM7,POLD3	7/242	TRUE	FALSE
1_Member	GO Cellular Components	GO:0005657	replication fork	-1.83856	-0.232636	4172,10714,29128	MCM3,POLD3,UHRF1	3/75	TRUE	FALSE
2_Summary	GO Biological Processes	GO:0000278	mitotic cell cycle	-12.3112	-8.38577	983,1909,3832,4171,4172,4173,4175,9319,9918,10051,10403,10592,24137,29128,51119,54443,54908,55872,57405,79003,79861,121441,128239,285643,729440,4288,7153,8780,140609,311,1163,5339,54821,55752,3148,55183,57650,3297,71,23210,29777,1410,55605,10397,83988,89795	CDK1,EDNRA,KIF11,MCM2,MCM3,MCM4,MCM6,TRIP13,NCAPD2,SMC4,NDC80,SMC2,KIF4A,UHRF1,SBDS,ANLN,SPDL1,PBK,SPC25,MIS12,TUBAL3,NEDD1,IQGAP3,KIF4B,CCDC61,MKI67,TOP2A,RIOK3,NEK7,ANXA11,CKS1B,PLEC,ERCC6L,SEPTIN11,HMGB2,RIF1,CIP2A,HSF1,ACTG1,JMJD6,ABT1,CRYAB,KIF21A,NDRG1,NCALD,NAV3	46/-	TRUE	TRUE
2_Member	GO Biological Processes	GO:0000278	mitotic cell cycle	-12.3112	-8.38577	983,1909,3832,4171,4172,4173,4175,9319,9918,10051,10403,10592,24137,29128,51119,54443,54908,55872,57405,79003,79861,121441,128239,285643,729440	CDK1,EDNRA,KIF11,MCM2,MCM3,MCM4,MCM6,TRIP13,NCAPD2,SMC4,NDC80,SMC2,KIF4A,UHRF1,SBDS,ANLN,SPDL1,PBK,SPC25,MIS12,TUBAL3,NEDD1,IQGAP3,KIF4B,CCDC61	25/598	TRUE	TRUE
2_Member	GO Biological Processes	GO:1903047	mitotic cell cycle process	-10.1522	-6.59475	983,3832,4171,4172,4173,4175,9319,9918,10051,10403,10592,24137,29128,51119,54443,54908,57405,79003,128239,285643,729440	CDK1,KIF11,MCM2,MCM3,MCM4,MCM6,TRIP13,NCAPD2,SMC4,NDC80,SMC2,KIF4A,UHRF1,SBDS,ANLN,SPDL1,SPC25,MIS12,IQGAP3,KIF4B,CCDC61	21/518	TRUE	TRUE
2_Member	GO Biological Processes	GO:0007059	chromosome segregation	-9.62576	-6.26465	3832,4288,7153,8780,9319,9918,10051,10403,10592,24137,29128,54908,57405,79003,140609,285643,729440	KIF11,MKI67,TOP2A,RIOK3,TRIP13,NCAPD2,SMC4,NDC80,SMC2,KIF4A,UHRF1,SPDL1,SPC25,MIS12,NEK7,KIF4B,CCDC61	17/343	TRUE	TRUE
2_Member	GO Biological Processes	GO:0000819	sister chromatid segregation	-9.31836	-6.0298	3832,7153,9918,10051,10403,10592,24137,29128,54908,79003,285643,729440	KIF11,TOP2A,NCAPD2,SMC4,NDC80,SMC2,KIF4A,UHRF1,SPDL1,MIS12,KIF4B,CCDC61	12/149	TRUE	TRUE
2_Member	GO Biological Processes	GO:0051301	cell division	-9.16237	-5.96399	311,983,1163,3832,5339,7153,9918,10051,10403,10592,24137,54443,54821,54908,55752,57405,79003,121441,128239,285643	ANXA11,CDK1,CKS1B,KIF11,PLEC,TOP2A,NCAPD2,SMC4,NDC80,SMC2,KIF4A,ANLN,ERCC6L,SPDL1,SEPTIN11,SPC25,MIS12,NEDD1,IQGAP3,KIF4B	20/529	TRUE	TRUE
2_Member	GO Biological Processes	GO:0098813	nuclear chromosome segregation	-8.94869	-5.82494	3832,7153,9319,9918,10051,10403,10592,24137,29128,54908,57405,79003,285643,729440	KIF11,TOP2A,TRIP13,NCAPD2,SMC4,NDC80,SMC2,KIF4A,UHRF1,SPDL1,SPC25,MIS12,KIF4B,CCDC61	14/239	TRUE	TRUE
2_Member	GO Biological Processes	GO:0000070	mitotic sister chromatid segregation	-8.31263	-5.3251	3832,9918,10051,10403,10592,24137,29128,54908,79003,285643,729440	KIF11,NCAPD2,SMC4,NDC80,SMC2,KIF4A,UHRF1,SPDL1,MIS12,KIF4B,CCDC61	11/145	TRUE	TRUE
2_Member	GO Biological Processes	GO:0051276	chromosome organization	-7.8117	-4.94067	983,3148,3832,7153,9319,9918,10051,10403,10592,24137,29128,54908,55183,57650,79003,285643,729440	CDK1,HMGB2,KIF11,TOP2A,TRIP13,NCAPD2,SMC4,NDC80,SMC2,KIF4A,UHRF1,SPDL1,RIF1,CIP2A,MIS12,KIF4B,CCDC61	17/453	TRUE	TRUE
2_Member	GO Biological Processes	GO:0140014	mitotic nuclear division	-7.53885	-4.71613	3832,9918,10051,10403,10592,24137,29128,54908,79003,285643,729440	KIF11,NCAPD2,SMC4,NDC80,SMC2,KIF4A,UHRF1,SPDL1,MIS12,KIF4B,CCDC61	11/172	TRUE	TRUE
2_Member	GO Biological Processes	GO:1902850	microtubule cytoskeleton organization involved in mitosis	-7.47717	-4.67672	983,3832,10403,24137,29128,51119,54908,57405,285643,729440	CDK1,KIF11,NDC80,KIF4A,UHRF1,SBDS,SPDL1,SPC25,KIF4B,CCDC61	10/136	TRUE	TRUE
2_Member	GO Biological Processes	GO:0000280	nuclear division	-7.19008	-4.45033	3297,3832,7153,9319,9918,10051,10403,10592,24137,29128,54908,79003,285643,729440	HSF1,KIF11,TOP2A,TRIP13,NCAPD2,SMC4,NDC80,SMC2,KIF4A,UHRF1,SPDL1,MIS12,KIF4B,CCDC61	14/329	TRUE	TRUE
2_Member	GO Biological Processes	GO:0048285	organelle fission	-6.72628	-4.07197	3297,3832,7153,9319,9918,10051,10403,10592,24137,29128,54908,79003,285643,729440	HSF1,KIF11,TOP2A,TRIP13,NCAPD2,SMC4,NDC80,SMC2,KIF4A,UHRF1,SPDL1,MIS12,KIF4B,CCDC61	14/359	TRUE	TRUE
2_Member	GO Biological Processes	GO:0140694	membraneless organelle assembly	-6.53946	-3.90781	71,3832,5339,10403,23210,24137,29128,29777,51119,54443,79003,140609,285643,729440	ACTG1,KIF11,PLEC,NDC80,JMJD6,KIF4A,UHRF1,ABT1,SBDS,ANLN,MIS12,NEK7,KIF4B,CCDC61	14/372	TRUE	TRUE
2_Member	GO Biological Processes	GO:0007052	mitotic spindle organization	-6.33864	-3.74232	3832,10403,24137,29128,51119,57405,285643,729440	KIF11,NDC80,KIF4A,UHRF1,SBDS,SPC25,KIF4B,CCDC61	8/101	TRUE	TRUE
2_Member	GO Biological Processes	GO:0007051	spindle organization	-5.54166	-3.06858	3832,10403,24137,29128,51119,57405,140609,285643,729440	KIF11,NDC80,KIF4A,UHRF1,SBDS,SPC25,NEK7,KIF4B,CCDC61	9/172	TRUE	TRUE
2_Member	GO Biological Processes	GO:0051225	spindle assembly	-5.11291	-2.719	3832,10403,24137,29128,140609,285643,729440	KIF11,NDC80,KIF4A,UHRF1,NEK7,KIF4B,CCDC61	7/105	TRUE	TRUE
2_Member	GO Biological Processes	GO:0000226	microtubule cytoskeleton organization	-4.86793	-2.52612	983,1410,3832,10403,24137,29128,51119,54908,55605,57405,79861,121441,140609,285643,729440	CDK1,CRYAB,KIF11,NDC80,KIF4A,UHRF1,SBDS,SPDL1,KIF21A,SPC25,TUBAL3,NEDD1,NEK7,KIF4B,CCDC61	15/590	TRUE	TRUE
2_Member	GO Molecular Functions	GO:0015631	tubulin binding	-4.78681	-2.46637	1410,3832,10397,10403,24137,51119,55605,83988,89795,121441,285643,729440	CRYAB,KIF11,NDRG1,NDC80,KIF4A,SBDS,KIF21A,NCALD,NAV3,NEDD1,KIF4B,CCDC61	12/391	TRUE	TRUE
2_Member	GO Molecular Functions	GO:0008017	microtubule binding	-4.61729	-2.33864	1410,3832,10397,10403,24137,51119,55605,89795,285643,729440	CRYAB,KIF11,NDRG1,NDC80,KIF4A,SBDS,KIF21A,NAV3,KIF4B,CCDC61	10/281	TRUE	TRUE
2_Member	GO Biological Processes	GO:0090307	mitotic spindle assembly	-4.56288	-2.29637	3832,24137,29128,285643,729440	KIF11,KIF4A,UHRF1,KIF4B,CCDC61	5/52	TRUE	TRUE
3_Summary	GO Biological Processes	GO:0019885	antigen processing and presentation of endogenous peptide antigen via MHC class I	-8.21112	-5.28358	3106,3107,64167,80328,154064,353091,2022,2152,4277,4684,7070,8140,8482,80380,80381,100507436,3263,22890,55183,338322,249,6277,94056,836,54872	HLA-B,HLA-C,ERAP2,ULBP2,RAET1L,RAET1G,ENG,F3,MICB,NCAM1,THY1,SLC7A5,SEMA7A,PDCD1LG2,CD276,MICA,HPX,ZBTB1,RIF1,NLRP10,ALPL,S100A6,SYAP1,CASP3,PIGG	25/-	TRUE	TRUE
3_Member	GO Biological Processes	GO:0019885	antigen processing and presentation of endogenous peptide antigen via MHC class I	-8.21112	-5.28358	3106,3107,64167,80328,154064,353091	HLA-B,HLA-C,ERAP2,ULBP2,RAET1L,RAET1G	6/22	TRUE	TRUE
3_Member	GO Biological Processes	GO:0002483	antigen processing and presentation of endogenous peptide antigen	-7.95981	-5.07582	3106,3107,64167,80328,154064,353091	HLA-B,HLA-C,ERAP2,ULBP2,RAET1L,RAET1G	6/24	TRUE	TRUE
3_Member	GO Biological Processes	GO:0002486	antigen processing and presentation of endogenous peptide antigen via MHC class I via ER pathway, TAP-independent	-7.58533	-4.75103	3106,3107,80328,154064,353091	HLA-B,HLA-C,ULBP2,RAET1L,RAET1G	5/14	TRUE	TRUE
3_Member	GO Biological Processes	GO:0002476	antigen processing and presentation of endogenous peptide antigen via MHC class Ib	-7.41163	-4.63238	3106,3107,80328,154064,353091	HLA-B,HLA-C,ULBP2,RAET1L,RAET1G	5/15	TRUE	TRUE
3_Member	GO Biological Processes	GO:0002484	antigen processing and presentation of endogenous peptide antigen via MHC class I via ER pathway	-7.41163	-4.63238	3106,3107,80328,154064,353091	HLA-B,HLA-C,ULBP2,RAET1L,RAET1G	5/15	TRUE	TRUE
3_Member	GO Biological Processes	GO:0002428	antigen processing and presentation of peptide antigen via MHC class Ib	-7.2513	-4.48227	3106,3107,80328,154064,353091	HLA-B,HLA-C,ULBP2,RAET1L,RAET1G	5/16	TRUE	TRUE
3_Member	GO Biological Processes	GO:0019883	antigen processing and presentation of endogenous antigen	-7.23897	-4.47992	3106,3107,64167,80328,154064,353091	HLA-B,HLA-C,ERAP2,ULBP2,RAET1L,RAET1G	6/31	TRUE	TRUE
3_Member	GO Cellular Components	GO:0009897	external side of plasma membrane	-7.03359	-4.32129	2022,2152,3106,3107,4277,4684,7070,8140,8482,80328,80380,80381,154064,353091,100507436	ENG,F3,HLA-B,HLA-C,MICB,NCAM1,THY1,SLC7A5,SEMA7A,ULBP2,PDCD1LG2,CD276,RAET1L,RAET1G,MICA	15/394	TRUE	TRUE
3_Member	GO Molecular Functions	GO:0046703	natural killer cell lectin-like receptor binding	-6.85206	-4.17383	4277,80328,353091,100507436	MICB,ULBP2,RAET1G,MICA	4/8	FALSE	TRUE
3_Member	GO Biological Processes	GO:0002474	antigen processing and presentation of peptide antigen via MHC class I	-6.75433	-4.09219	3106,3107,64167,80328,154064,353091	HLA-B,HLA-C,ERAP2,ULBP2,RAET1L,RAET1G	6/37	TRUE	TRUE
3_Member	GO Biological Processes	GO:0002824	positive regulation of adaptive immune response based on somatic recombination of immune receptors built from immunoglobulin superfamily domains	-6.50371	-3.87936	3106,3107,3263,22890,55183,80328,154064,338322,353091	HLA-B,HLA-C,HPX,ZBTB1,RIF1,ULBP2,RAET1L,NLRP10,RAET1G	9/132	TRUE	TRUE
3_Member	GO Biological Processes	GO:0002475	antigen processing and presentation via MHC class Ib	-6.38139	-3.76422	3106,3107,80328,154064,353091	HLA-B,HLA-C,ULBP2,RAET1L,RAET1G	5/23	TRUE	TRUE
3_Member	GO Biological Processes	GO:0002821	positive regulation of adaptive immune response	-6.33978	-3.74232	3106,3107,3263,22890,55183,80328,154064,338322,353091	HLA-B,HLA-C,HPX,ZBTB1,RIF1,ULBP2,RAET1L,NLRP10,RAET1G	9/138	TRUE	TRUE
3_Member	GO Cellular Components	GO:0098552	side of membrane	-6.12141	-3.55155	249,2022,2152,3106,3107,4277,4684,6277,7070,8140,8482,80328,80380,80381,94056,154064,338322,353091,100507436	ALPL,ENG,F3,HLA-B,HLA-C,MICB,NCAM1,S100A6,THY1,SLC7A5,SEMA7A,ULBP2,PDCD1LG2,CD276,SYAP1,RAET1L,NLRP10,RAET1G,MICA	19/737	TRUE	TRUE
3_Member	KEGG Pathway	hsa04650	Natural killer cell mediated cytotoxicity	-5.40819	-2.95508	836,3106,3107,4277,80328,154064,353091,100507436	CASP3,HLA-B,HLA-C,MICB,ULBP2,RAET1L,RAET1G,MICA	8/134	TRUE	TRUE
3_Member	GO Biological Processes	GO:0002708	positive regulation of lymphocyte mediated immunity	-5.33673	-2.89327	3106,3107,3263,22890,55183,80328,154064,353091	HLA-B,HLA-C,HPX,ZBTB1,RIF1,ULBP2,RAET1L,RAET1G	8/137	TRUE	TRUE
3_Member	GO Biological Processes	GO:0001916	positive regulation of T cell mediated cytotoxicity	-5.2436	-2.80958	3106,3107,80328,154064,353091	HLA-B,HLA-C,ULBP2,RAET1L,RAET1G	5/38	TRUE	TRUE
3_Member	GO Biological Processes	GO:0048002	antigen processing and presentation of peptide antigen	-5.12027	-2.72209	3106,3107,64167,80328,154064,353091	HLA-B,HLA-C,ERAP2,ULBP2,RAET1L,RAET1G	6/69	TRUE	TRUE
3_Member	GO Biological Processes	GO:0002711	positive regulation of T cell mediated immunity	-4.94346	-2.59145	3106,3107,22890,80328,154064,353091	HLA-B,HLA-C,ZBTB1,ULBP2,RAET1L,RAET1G	6/74	TRUE	TRUE
3_Member	GO Biological Processes	GO:0002706	regulation of lymphocyte mediated immunity	-4.94087	-2.59145	3106,3107,3263,22890,55183,80328,154064,353091,100507436	HLA-B,HLA-C,HPX,ZBTB1,RIF1,ULBP2,RAET1L,RAET1G,MICA	9/204	TRUE	TRUE
3_Member	GO Biological Processes	GO:0002705	positive regulation of leukocyte mediated immunity	-4.86173	-2.52368	3106,3107,3263,22890,55183,80328,154064,353091	HLA-B,HLA-C,HPX,ZBTB1,RIF1,ULBP2,RAET1L,RAET1G	8/159	TRUE	TRUE
3_Member	GO Biological Processes	GO:0002822	regulation of adaptive immune response based on somatic recombination of immune receptors built from immunoglobulin superfamily domains	-4.84046	-2.50614	3106,3107,3263,22890,55183,80328,154064,338322,353091	HLA-B,HLA-C,HPX,ZBTB1,RIF1,ULBP2,RAET1L,NLRP10,RAET1G	9/210	TRUE	TRUE
3_Member	GO Biological Processes	GO:0001914	regulation of T cell mediated cytotoxicity	-4.73456	-2.43586	3106,3107,80328,154064,353091	HLA-B,HLA-C,ULBP2,RAET1L,RAET1G	5/48	TRUE	TRUE
3_Member	GO Biological Processes	GO:0002699	positive regulation of immune effector process	-4.68387	-2.39196	3106,3107,3263,8140,8482,22890,55183,80328,154064,353091	HLA-B,HLA-C,HPX,SLC7A5,SEMA7A,ZBTB1,RIF1,ULBP2,RAET1L,RAET1G	10/276	TRUE	TRUE
3_Member	GO Biological Processes	GO:0002819	regulation of adaptive immune response	-4.61874	-2.33864	3106,3107,3263,22890,55183,80328,154064,338322,353091	HLA-B,HLA-C,HPX,ZBTB1,RIF1,ULBP2,RAET1L,NLRP10,RAET1G	9/224	TRUE	TRUE
3_Member	Reactome Gene Sets	R-HSA-163125	Post-translational modification: synthesis of GPI-anchored proteins	-4.37547	-2.14029	249,7070,54872,80328,154064,353091	ALPL,THY1,PIGG,ULBP2,RAET1L,RAET1G	6/93	TRUE	TRUE
3_Member	GO Biological Processes	GO:0001910	regulation of leukocyte mediated cytotoxicity	-4.17416	-1.97848	3106,3107,80328,154064,353091,100507436	HLA-B,HLA-C,ULBP2,RAET1L,RAET1G,MICA	6/101	TRUE	TRUE
3_Member	GO Biological Processes	GO:0019882	antigen processing and presentation	-4.10326	-1.93376	3106,3107,64167,80328,154064,353091	HLA-B,HLA-C,ERAP2,ULBP2,RAET1L,RAET1G	6/104	TRUE	TRUE
3_Member	GO Biological Processes	GO:0002703	regulation of leukocyte mediated immunity	-4.0665	-1.90951	3106,3107,3263,22890,55183,80328,154064,353091,100507436	HLA-B,HLA-C,HPX,ZBTB1,RIF1,ULBP2,RAET1L,RAET1G,MICA	9/264	TRUE	TRUE
3_Member	GO Biological Processes	GO:0002709	regulation of T cell mediated immunity	-4.01225	-1.86982	3106,3107,22890,80328,154064,353091	HLA-B,HLA-C,ZBTB1,ULBP2,RAET1L,RAET1G	6/108	TRUE	TRUE
3_Member	GO Biological Processes	GO:0001912	positive regulation of leukocyte mediated cytotoxicity	-3.93768	-1.82248	3106,3107,80328,154064,353091	HLA-B,HLA-C,ULBP2,RAET1L,RAET1G	5/70	TRUE	TRUE
3_Member	GO Biological Processes	GO:0031341	regulation of cell killing	-3.92499	-1.81252	3106,3107,80328,154064,353091,100507436	HLA-B,HLA-C,ULBP2,RAET1L,RAET1G,MICA	6/112	TRUE	TRUE
3_Member	GO Biological Processes	GO:0031343	positive regulation of cell killing	-3.85103	-1.75172	3106,3107,80328,154064,353091	HLA-B,HLA-C,ULBP2,RAET1L,RAET1G	5/73	TRUE	TRUE
3_Member	GO Biological Processes	GO:0002697	regulation of immune effector process	-3.81294	-1.71579	3106,3107,3263,8140,8482,22890,55183,80328,154064,353091,100507436	HLA-B,HLA-C,HPX,SLC7A5,SEMA7A,ZBTB1,RIF1,ULBP2,RAET1L,RAET1G,MICA	11/421	TRUE	TRUE
3_Member	GO Biological Processes	GO:0042267	natural killer cell mediated cytotoxicity	-2.42465	-0.665602	80328,353091,100507436	ULBP2,RAET1G,MICA	3/46	FALSE	FALSE
3_Member	GO Biological Processes	GO:0002228	natural killer cell mediated immunity	-2.32227	-0.586285	80328,353091,100507436	ULBP2,RAET1G,MICA	3/50	FALSE	FALSE
3_Member	GO Biological Processes	GO:0001909	leukocyte mediated cytotoxicity	-1.72183	-0.156281	80328,353091,100507436	ULBP2,RAET1G,MICA	3/83	FALSE	FALSE
3_Member	GO Biological Processes	GO:0001906	cell killing	-1.32807	0	4277,80328,353091,100507436	MICB,ULBP2,RAET1G,MICA	4/199	FALSE	FALSE
4_Summary	Reactome Gene Sets	R-HSA-68877	Mitotic Prometaphase	-7.72064	-4.8622	983,9918,10051,10403,10592,54821,54908,57405,79003,79861,121441,140609,3148,3297,4288,7153,55183,9319,5570,3481,54461,71,1163,6240,54443,3832,5902,6422,128239,836	CDK1,NCAPD2,SMC4,NDC80,SMC2,ERCC6L,SPDL1,SPC25,MIS12,TUBAL3,NEDD1,NEK7,HMGB2,HSF1,MKI67,TOP2A,RIF1,TRIP13,PKIB,IGF2,FBXW5,ACTG1,CKS1B,RRM1,ANLN,KIF11,RANBP1,SFRP1,IQGAP3,CASP3	30/-	TRUE	TRUE
4_Member	Reactome Gene Sets	R-HSA-68877	Mitotic Prometaphase	-7.72064	-4.8622	983,9918,10051,10403,10592,54821,54908,57405,79003,79861,121441,140609	CDK1,NCAPD2,SMC4,NDC80,SMC2,ERCC6L,SPDL1,SPC25,MIS12,TUBAL3,NEDD1,NEK7	12/206	TRUE	TRUE
4_Member	GO Cellular Components	GO:0000793	condensed chromosome	-7.00989	-4.30636	3148,3297,4288,7153,9918,10051,10403,10592,54821,54908,55183,57405,79003	HMGB2,HSF1,MKI67,TOP2A,NCAPD2,SMC4,NDC80,SMC2,ERCC6L,SPDL1,RIF1,SPC25,MIS12	13/288	TRUE	TRUE
4_Member	GO Biological Processes	GO:1905818	regulation of chromosome separation	-6.05842	-3.50718	9319,9918,10051,10403,10592,54908,57405	TRIP13,NCAPD2,SMC4,NDC80,SMC2,SPDL1,SPC25	7/76	TRUE	TRUE
4_Member	GO Biological Processes	GO:0051983	regulation of chromosome segregation	-5.40819	-2.95508	983,9319,9918,10051,10403,10592,54908,57405	CDK1,TRIP13,NCAPD2,SMC4,NDC80,SMC2,SPDL1,SPC25	8/134	TRUE	TRUE
4_Member	GO Biological Processes	GO:0033044	regulation of chromosome organization	-5.14736	-2.74049	983,5570,9319,9918,10051,10403,10592,54908,57405,140609	CDK1,PKIB,TRIP13,NCAPD2,SMC4,NDC80,SMC2,SPDL1,SPC25,NEK7	10/244	TRUE	TRUE
4_Member	GO Cellular Components	GO:0000940	outer kinetochore	-5.0396	-2.67419	10403,54908,57405,79003	NDC80,SPDL1,SPC25,MIS12	4/20	TRUE	TRUE
4_Member	GO Biological Processes	GO:0007088	regulation of mitotic nuclear division	-4.75647	-2.45433	3481,4288,9319,10403,54461,54908,57405	IGF2,MKI67,TRIP13,NDC80,FBXW5,SPDL1,SPC25	7/119	TRUE	TRUE
4_Member	Reactome Gene Sets	R-HSA-9648025	EML4 and NUDC in mitotic spindle formation	-4.75647	-2.45433	10403,54821,54908,57405,79003,79861,140609	NDC80,ERCC6L,SPDL1,SPC25,MIS12,TUBAL3,NEK7	7/119	TRUE	TRUE
4_Member	Reactome Gene Sets	R-HSA-68886	M Phase	-4.6262	-2.34097	983,9918,10051,10403,10592,54821,54908,57405,79003,79861,121441,140609	CDK1,NCAPD2,SMC4,NDC80,SMC2,ERCC6L,SPDL1,SPC25,MIS12,TUBAL3,NEDD1,NEK7	12/406	TRUE	TRUE
4_Member	Reactome Gene Sets	R-HSA-2500257	Resolution of Sister Chromatid Cohesion	-4.52977	-2.26715	983,10403,54821,54908,57405,79003,79861	CDK1,NDC80,ERCC6L,SPDL1,SPC25,MIS12,TUBAL3	7/129	TRUE	TRUE
4_Member	GO Biological Processes	GO:0033047	regulation of mitotic sister chromatid segregation	-4.36769	-2.13545	983,9319,10403,54908,57405	CDK1,TRIP13,NDC80,SPDL1,SPC25	5/57	TRUE	TRUE
4_Member	GO Biological Processes	GO:0007094	mitotic spindle assembly checkpoint signaling	-4.31013	-2.09515	9319,10403,54908,57405	TRIP13,NDC80,SPDL1,SPC25	4/30	TRUE	TRUE
4_Member	GO Biological Processes	GO:0071173	spindle assembly checkpoint signaling	-4.31013	-2.09515	9319,10403,54908,57405	TRIP13,NDC80,SPDL1,SPC25	4/30	TRUE	TRUE
4_Member	GO Biological Processes	GO:0071174	mitotic spindle checkpoint signaling	-4.31013	-2.09515	9319,10403,54908,57405	TRIP13,NDC80,SPDL1,SPC25	4/30	TRUE	TRUE
4_Member	Reactome Gene Sets	R-HSA-5663220	RHO GTPases Activate Formins	-4.26335	-2.05118	71,10403,54821,54908,57405,79003,79861	ACTG1,NDC80,ERCC6L,SPDL1,SPC25,MIS12,TUBAL3	7/142	TRUE	TRUE
4_Member	GO Biological Processes	GO:0031577	spindle checkpoint signaling	-4.25244	-2.04306	9319,10403,54908,57405	TRIP13,NDC80,SPDL1,SPC25	4/31	TRUE	TRUE
4_Member	GO Biological Processes	GO:0051783	regulation of nuclear division	-4.16826	-1.97527	3481,4288,9319,10403,54461,54908,57405	IGF2,MKI67,TRIP13,NDC80,FBXW5,SPDL1,SPC25	7/147	TRUE	TRUE
4_Member	GO Biological Processes	GO:0007346	regulation of mitotic cell cycle	-4.15668	-1.96636	983,1163,3297,3481,4288,6240,9319,10403,54443,54461,54908,57405,140609	CDK1,CKS1B,HSF1,IGF2,MKI67,RRM1,TRIP13,NDC80,ANLN,FBXW5,SPDL1,SPC25,NEK7	13/527	TRUE	TRUE
4_Member	GO Biological Processes	GO:0033046	negative regulation of sister chromatid segregation	-4.14294	-1.96574	9319,10403,54908,57405	TRIP13,NDC80,SPDL1,SPC25	4/33	TRUE	TRUE
4_Member	GO Biological Processes	GO:0033048	negative regulation of mitotic sister chromatid segregation	-4.14294	-1.96574	9319,10403,54908,57405	TRIP13,NDC80,SPDL1,SPC25	4/33	TRUE	TRUE
4_Member	GO Biological Processes	GO:0045841	negative regulation of mitotic metaphase/anaphase transition	-4.14294	-1.96574	9319,10403,54908,57405	TRIP13,NDC80,SPDL1,SPC25	4/33	TRUE	TRUE
4_Member	GO Biological Processes	GO:2000816	negative regulation of mitotic sister chromatid separation	-4.14294	-1.96574	9319,10403,54908,57405	TRIP13,NDC80,SPDL1,SPC25	4/33	TRUE	TRUE
4_Member	GO Biological Processes	GO:0010564	regulation of cell cycle process	-4.07009	-1.91062	983,3481,3832,4288,5902,6240,6422,9319,9918,10051,10403,10592,54443,54461,54908,57405	CDK1,IGF2,KIF11,MKI67,RANBP1,RRM1,SFRP1,TRIP13,NCAPD2,SMC4,NDC80,SMC2,ANLN,FBXW5,SPDL1,SPC25	16/775	TRUE	TRUE
4_Member	GO Biological Processes	GO:1902100	negative regulation of metaphase/anaphase transition of cell cycle	-4.04048	-1.89325	9319,10403,54908,57405	TRIP13,NDC80,SPDL1,SPC25	4/35	TRUE	TRUE
4_Member	GO Biological Processes	GO:1905819	negative regulation of chromosome separation	-4.04048	-1.89325	9319,10403,54908,57405	TRIP13,NDC80,SPDL1,SPC25	4/35	TRUE	TRUE
4_Member	GO Cellular Components	GO:0000775	chromosome, centromeric region	-4.0292	-1.88438	3297,7153,9918,10051,10403,54821,54908,57405,79003	HSF1,TOP2A,NCAPD2,SMC4,NDC80,ERCC6L,SPDL1,SPC25,MIS12	9/267	TRUE	TRUE
4_Member	GO Biological Processes	GO:0051985	negative regulation of chromosome segregation	-3.99163	-1.85241	9319,10403,54908,57405	TRIP13,NDC80,SPDL1,SPC25	4/36	TRUE	TRUE
4_Member	GO Biological Processes	GO:0045839	negative regulation of mitotic nuclear division	-3.81008	-1.71507	9319,10403,54908,57405	TRIP13,NDC80,SPDL1,SPC25	4/40	TRUE	TRUE
4_Member	GO Biological Processes	GO:0051784	negative regulation of nuclear division	-3.53575	-1.49686	9319,10403,54908,57405	TRIP13,NDC80,SPDL1,SPC25	4/47	TRUE	TRUE
4_Member	GO Cellular Components	GO:0000779	condensed chromosome, centromeric region	-3.52167	-1.48465	3297,9918,10403,54821,54908,57405,79003	HSF1,NCAPD2,NDC80,ERCC6L,SPDL1,SPC25,MIS12	7/187	TRUE	TRUE
4_Member	Reactome Gene Sets	R-HSA-141424	Amplification of signal from the kinetochores	-3.29611	-1.31025	10403,54821,54908,57405,79003	NDC80,ERCC6L,SPDL1,SPC25,MIS12	5/96	TRUE	TRUE
4_Member	Reactome Gene Sets	R-HSA-141444	Amplification of signal from unattached kinetochores via a MAD2 inhibitory signal	-3.29611	-1.31025	10403,54821,54908,57405,79003	NDC80,ERCC6L,SPDL1,SPC25,MIS12	5/96	TRUE	TRUE
4_Member	GO Biological Processes	GO:0010965	regulation of mitotic sister chromatid separation	-3.10161	-1.1585	9319,10403,54908,57405	TRIP13,NDC80,SPDL1,SPC25	4/61	TRUE	FALSE
4_Member	GO Biological Processes	GO:0033045	regulation of sister chromatid segregation	-3.08181	-1.1432	983,9319,10403,54908,57405	CDK1,TRIP13,NDC80,SPDL1,SPC25	5/107	TRUE	FALSE
4_Member	Reactome Gene Sets	R-HSA-68882	Mitotic Anaphase	-3.04433	-1.11018	983,10403,54821,54908,57405,79003,79861	CDK1,NDC80,ERCC6L,SPDL1,SPC25,MIS12,TUBAL3	7/225	TRUE	FALSE
4_Member	Reactome Gene Sets	R-HSA-2555396	Mitotic Metaphase and Anaphase	-3.03313	-1.10045	983,10403,54821,54908,57405,79003,79861	CDK1,NDC80,ERCC6L,SPDL1,SPC25,MIS12,TUBAL3	7/226	TRUE	FALSE
4_Member	Reactome Gene Sets	R-HSA-69618	Mitotic Spindle Checkpoint	-2.97531	-1.05282	10403,54821,54908,57405,79003	NDC80,ERCC6L,SPDL1,SPC25,MIS12	5/113	TRUE	FALSE
4_Member	GO Biological Processes	GO:0007093	mitotic cell cycle checkpoint signaling	-2.90788	-1.00231	983,9319,10403,54908,57405	CDK1,TRIP13,NDC80,SPDL1,SPC25	5/117	TRUE	FALSE
4_Member	GO Cellular Components	GO:0000776	kinetochore	-2.89324	-0.991795	3297,10403,54821,54908,57405,79003	HSF1,NDC80,ERCC6L,SPDL1,SPC25,MIS12	6/175	TRUE	FALSE
4_Member	Reactome Gene Sets	R-HSA-2467813	Separation of Sister Chromatids	-2.83085	-0.951665	10403,54821,54908,57405,79003,79861	NDC80,ERCC6L,SPDL1,SPC25,MIS12,TUBAL3	6/180	TRUE	FALSE
4_Member	Reactome Gene Sets	R-HSA-195258	RHO GTPase Effectors	-2.7431	-0.884665	71,10403,54821,54908,57405,79003,79861,128239	ACTG1,NDC80,ERCC6L,SPDL1,SPC25,MIS12,TUBAL3,IQGAP3	8/326	TRUE	FALSE
4_Member	GO Biological Processes	GO:0008608	attachment of spindle microtubules to kinetochore	-2.73067	-0.875941	10403,57405,79003	NDC80,SPC25,MIS12	3/36	TRUE	FALSE
4_Member	GO Biological Processes	GO:2001251	negative regulation of chromosome organization	-2.66348	-0.825893	9319,10403,54908,57405	TRIP13,NDC80,SPDL1,SPC25	4/80	TRUE	FALSE
4_Member	GO Biological Processes	GO:0051310	metaphase chromosome alignment	-2.53101	-0.729481	10403,54908,57405,79003	NDC80,SPDL1,SPC25,MIS12	4/87	TRUE	FALSE
4_Member	GO Biological Processes	GO:0030071	regulation of mitotic metaphase/anaphase transition	-2.44364	-0.671565	9319,10403,54908,57405	TRIP13,NDC80,SPDL1,SPC25	4/92	TRUE	FALSE
4_Member	GO Biological Processes	GO:1902099	regulation of metaphase/anaphase transition of cell cycle	-2.3938	-0.642574	9319,10403,54908,57405	TRIP13,NDC80,SPDL1,SPC25	4/95	TRUE	FALSE
4_Member	GO Biological Processes	GO:0000075	cell cycle checkpoint signaling	-2.37736	-0.629993	983,9319,10403,54908,57405	CDK1,TRIP13,NDC80,SPDL1,SPC25	5/155	TRUE	FALSE
4_Member	GO Biological Processes	GO:0051303	establishment of chromosome localization	-2.31464	-0.580526	10403,54908,57405,79003	NDC80,SPDL1,SPC25,MIS12	4/100	TRUE	FALSE
4_Member	GO Biological Processes	GO:0050000	chromosome localization	-2.19711	-0.491839	10403,54908,57405,79003	NDC80,SPDL1,SPC25,MIS12	4/108	TRUE	FALSE
4_Member	GO Biological Processes	GO:1901991	negative regulation of mitotic cell cycle phase transition	-2.13717	-0.440533	983,9319,10403,54908,57405	CDK1,TRIP13,NDC80,SPDL1,SPC25	5/177	TRUE	FALSE
4_Member	GO Biological Processes	GO:0007080	mitotic metaphase chromosome alignment	-2.12184	-0.429451	10403,54908,79003	NDC80,SPDL1,MIS12	3/59	TRUE	FALSE
4_Member	GO Biological Processes	GO:1901990	regulation of mitotic cell cycle phase transition	-1.94781	-0.301181	983,6240,9319,10403,54443,54908,57405	CDK1,RRM1,TRIP13,NDC80,ANLN,SPDL1,SPC25	7/357	TRUE	FALSE
4_Member	GO Biological Processes	GO:0045930	negative regulation of mitotic cell cycle	-1.71525	-0.150333	983,9319,10403,54908,57405	CDK1,TRIP13,NDC80,SPDL1,SPC25	5/226	TRUE	FALSE
4_Member	GO Biological Processes	GO:1901988	negative regulation of cell cycle phase transition	-1.59576	-0.066581	983,9319,10403,54908,57405	CDK1,TRIP13,NDC80,SPDL1,SPC25	5/243	TRUE	FALSE
4_Member	GO Biological Processes	GO:1901987	regulation of cell cycle phase transition	-1.38594	0	983,6240,9319,10403,54443,54908,57405	CDK1,RRM1,TRIP13,NDC80,ANLN,SPDL1,SPC25	7/468	TRUE	FALSE
4_Member	GO Biological Processes	GO:0045786	negative regulation of cell cycle	-1.36385	0	836,983,9319,10403,54908,57405	CASP3,CDK1,TRIP13,NDC80,SPDL1,SPC25	6/375	TRUE	FALSE
4_Member	GO Biological Processes	GO:0010948	negative regulation of cell cycle process	-1.30141	0	983,9319,10403,54908,57405	CDK1,TRIP13,NDC80,SPDL1,SPC25	5/293	TRUE	FALSE
5_Summary	Reactome Gene Sets	R-HSA-109582	Hemostasis	-6.55434	-3.91527	338,813,960,2152,3481,3832,5575,5592,5593,6543,6546,6678,8140,24137,55605,79861,221955,285643	APOB,CALU,CD44,F3,IGF2,KIF11,PRKAR1B,PRKG1,PRKG2,SLC8A2,SLC8A1,SPARC,SLC7A5,KIF4A,KIF21A,TUBAL3,DAGLB,KIF4B	18/-	TRUE	TRUE
5_Member	Reactome Gene Sets	R-HSA-109582	Hemostasis	-6.55434	-3.91527	338,813,960,2152,3481,3832,5575,5592,5593,6543,6546,6678,8140,24137,55605,79861,221955,285643	APOB,CALU,CD44,F3,IGF2,KIF11,PRKAR1B,PRKG1,PRKG2,SLC8A2,SLC8A1,SPARC,SLC7A5,KIF4A,KIF21A,TUBAL3,DAGLB,KIF4B	18/621	TRUE	TRUE
6_Summary	Reactome Gene Sets	R-HSA-2514853	Condensation of Prometaphase Chromosomes	-6.18558	-3.59599	983,9918,10051,10592,10403,79003,7153,5570,140609,3481,5902,6240,3297,9319,6422,89795	CDK1,NCAPD2,SMC4,SMC2,NDC80,MIS12,TOP2A,PKIB,NEK7,IGF2,RANBP1,RRM1,HSF1,TRIP13,SFRP1,NAV3	16/-	TRUE	TRUE
6_Member	Reactome Gene Sets	R-HSA-2514853	Condensation of Prometaphase Chromosomes	-6.18558	-3.59599	983,9918,10051,10592	CDK1,NCAPD2,SMC4,SMC2	4/11	TRUE	TRUE
6_Member	GO Biological Processes	GO:0051383	kinetochore organization	-5.23456	-2.80518	10051,10403,10592,79003	SMC4,NDC80,SMC2,MIS12	4/18	TRUE	TRUE
6_Member	GO Biological Processes	GO:0010032	meiotic chromosome condensation	-5.21825	-2.79347	9918,10051,10592	NCAPD2,SMC4,SMC2	3/6	TRUE	TRUE
6_Member	GO Biological Processes	GO:0030261	chromosome condensation	-5.07671	-2.68704	983,7153,9918,10051,10592	CDK1,TOP2A,NCAPD2,SMC4,SMC2	5/41	TRUE	TRUE
6_Member	GO Cellular Components	GO:0000796	condensin complex	-4.77545	-2.46637	9918,10051,10592	NCAPD2,SMC4,SMC2	3/8	TRUE	TRUE
6_Member	GO Biological Processes	GO:1905821	positive regulation of chromosome condensation	-4.77545	-2.46637	9918,10051,10592	NCAPD2,SMC4,SMC2	3/8	TRUE	TRUE
6_Member	GO Biological Processes	GO:0051984	positive regulation of chromosome segregation	-4.31013	-2.09515	983,9918,10051,10592	CDK1,NCAPD2,SMC4,SMC2	4/30	TRUE	TRUE
6_Member	GO Biological Processes	GO:2001252	positive regulation of chromosome organization	-4.08014	-1.9162	983,5570,9918,10051,10592,140609	CDK1,PKIB,NCAPD2,SMC4,SMC2,NEK7	6/105	TRUE	TRUE
6_Member	GO Biological Processes	GO:0060623	regulation of chromosome condensation	-3.9756	-1.84725	9918,10051,10592	NCAPD2,SMC4,SMC2	3/14	TRUE	TRUE
6_Member	Canonical Pathways	M14	PID AURORA B PATHWAY	-3.85354	-1.75172	9918,10051,10403,10592	NCAPD2,SMC4,NDC80,SMC2	4/39	TRUE	TRUE
6_Member	GO Biological Processes	GO:0007076	mitotic chromosome condensation	-3.79286	-1.70632	9918,10051,10592	NCAPD2,SMC4,SMC2	3/16	TRUE	TRUE
6_Member	GO Biological Processes	GO:0090068	positive regulation of cell cycle process	-3.17377	-1.21531	983,3481,5902,6240,9918,10051,10403,10592	CDK1,IGF2,RANBP1,RRM1,NCAPD2,SMC4,NDC80,SMC2	8/279	TRUE	FALSE
6_Member	GO Biological Processes	GO:0045787	positive regulation of cell cycle	-3.16552	-1.20862	983,3297,3481,5902,6240,9918,10051,10403,10592	CDK1,HSF1,IGF2,RANBP1,RRM1,NCAPD2,SMC4,NDC80,SMC2	9/350	TRUE	FALSE
6_Member	GO Biological Processes	GO:0070192	chromosome organization involved in meiotic cell cycle	-2.97284	-1.05178	9319,9918,10051,10592	TRIP13,NCAPD2,SMC4,SMC2	4/66	TRUE	FALSE
6_Member	GO Biological Processes	GO:1905820	positive regulation of chromosome separation	-2.84101	-0.958338	9918,10051,10592	NCAPD2,SMC4,SMC2	3/33	TRUE	FALSE
6_Member	GO Biological Processes	GO:0010638	positive regulation of organelle organization	-2.55095	-0.739514	983,3297,3481,5570,6422,9918,10051,10592,89795,140609	CDK1,HSF1,IGF2,PKIB,SFRP1,NCAPD2,SMC4,SMC2,NAV3,NEK7	10/514	TRUE	FALSE
6_Member	GO Biological Processes	GO:0045132	meiotic chromosome segregation	-2.42682	-0.665602	9319,10051,10403,10592	TRIP13,SMC4,NDC80,SMC2	4/93	TRUE	FALSE
6_Member	Reactome Gene Sets	R-HSA-2299718	Condensation of Prophase Chromosomes	-1.87	-0.254961	983,10051,10592	CDK1,SMC4,SMC2	3/73	TRUE	FALSE
6_Member	Reactome Gene Sets	R-HSA-68875	Mitotic Prophase	-1.80264	-0.209027	983,10051,10592,140609	CDK1,SMC4,SMC2,NEK7	4/141	TRUE	FALSE
6_Member	GO Cellular Components	GO:0000794	condensed nuclear chromosome	-1.72183	-0.156281	9918,10051,10592	NCAPD2,SMC4,SMC2	3/83	TRUE	FALSE
7_Summary	GO Biological Processes	GO:0061061	muscle structure development	-5.98501	-3.45174	71,836,983,1293,1410,1909,2022,3481,3488,5339,5592,6546,8910,26585,27295,78994,2950,3297,4257,4277,4521,5192,91298,5606,23210	ACTG1,CASP3,CDK1,COL6A3,CRYAB,EDNRA,ENG,IGF2,IGFBP5,PLEC,PRKG1,SLC8A1,SGCE,GREM1,PDLIM3,PRR14,GSTP1,HSF1,MGST1,MICB,NUDT1,PEX10,RLIG1,MAP2K3,JMJD6	25/-	TRUE	TRUE
7_Member	GO Biological Processes	GO:0061061	muscle structure development	-5.98501	-3.45174	71,836,983,1293,1410,1909,2022,3481,3488,5339,5592,6546,8910,26585,27295,78994	ACTG1,CASP3,CDK1,COL6A3,CRYAB,EDNRA,ENG,IGF2,IGFBP5,PLEC,PRKG1,SLC8A1,SGCE,GREM1,PDLIM3,PRR14	16/542	TRUE	TRUE
7_Member	GO Biological Processes	GO:0042692	muscle cell differentiation	-5.17437	-2.75864	71,836,983,1909,2022,3481,3488,5339,5592,6546,26585	ACTG1,CASP3,CDK1,EDNRA,ENG,IGF2,IGFBP5,PLEC,PRKG1,SLC8A1,GREM1	11/298	TRUE	TRUE
7_Member	GO Biological Processes	GO:0006979	response to oxidative stress	-4.83095	-2.50033	836,983,1410,1909,2950,3297,4257,4277,4521,5192,6546,91298	CASP3,CDK1,CRYAB,EDNRA,GSTP1,HSF1,MGST1,MICB,NUDT1,PEX10,SLC8A1,RLIG1	12/387	TRUE	TRUE
7_Member	GO Biological Processes	GO:0051146	striated muscle cell differentiation	-4.4847	-2.23141	71,836,983,3481,3488,5339,5592,6546,26585	ACTG1,CASP3,CDK1,IGF2,IGFBP5,PLEC,PRKG1,SLC8A1,GREM1	9/233	TRUE	TRUE
7_Member	GO Biological Processes	GO:0000302	response to reactive oxygen species	-4.47409	-2.22387	836,983,1410,2950,3297,5192,6546,91298	CASP3,CDK1,CRYAB,GSTP1,HSF1,PEX10,SLC8A1,RLIG1	8/180	TRUE	TRUE
7_Member	GO Biological Processes	GO:0055001	muscle cell development	-3.68198	-1.61992	71,983,1909,2022,5339,5592,6546	ACTG1,CDK1,EDNRA,ENG,PLEC,PRKG1,SLC8A1	7/176	TRUE	TRUE
7_Member	GO Biological Processes	GO:0035051	cardiocyte differentiation	-3.55413	-1.50956	983,1909,5339,5592,6546,26585	CDK1,EDNRA,PLEC,PRKG1,SLC8A1,GREM1	6/131	TRUE	TRUE
7_Member	GO Biological Processes	GO:0048738	cardiac muscle tissue development	-3.32033	-1.31923	983,1909,2022,5339,5592,6546,26585	CDK1,EDNRA,ENG,PLEC,PRKG1,SLC8A1,GREM1	7/202	TRUE	TRUE
7_Member	GO Biological Processes	GO:0055007	cardiac muscle cell differentiation	-3.1954	-1.23381	983,5339,5592,6546,26585	CDK1,PLEC,PRKG1,SLC8A1,GREM1	5/101	TRUE	FALSE
7_Member	GO Biological Processes	GO:0062197	cellular response to chemical stress	-2.98924	-1.06386	836,983,1909,3297,4257,5192,5339,6546	CASP3,CDK1,EDNRA,HSF1,MGST1,PEX10,PLEC,SLC8A1	8/298	TRUE	FALSE
7_Member	GO Biological Processes	GO:0055013	cardiac muscle cell development	-2.90069	-0.99788	983,5339,5592,6546	CDK1,PLEC,PRKG1,SLC8A1	4/69	TRUE	FALSE
7_Member	GO Biological Processes	GO:0055006	cardiac cell development	-2.74523	-0.884665	983,5339,5592,6546	CDK1,PLEC,PRKG1,SLC8A1	4/76	TRUE	FALSE
7_Member	GO Biological Processes	GO:0007507	heart development	-2.62384	-0.794213	836,983,1909,2022,5339,5592,5606,6546,23210,26585,27295	CASP3,CDK1,EDNRA,ENG,PLEC,PRKG1,MAP2K3,SLC8A1,JMJD6,GREM1,PDLIM3	11/588	TRUE	FALSE
7_Member	GO Biological Processes	GO:0055002	striated muscle cell development	-2.47518	-0.69073	71,983,5339,5592,6546	ACTG1,CDK1,PLEC,PRKG1,SLC8A1	5/147	TRUE	FALSE
7_Member	GO Biological Processes	GO:0034599	cellular response to oxidative stress	-2.25096	-0.530605	983,1909,3297,4257,5192,6546	CDK1,EDNRA,HSF1,MGST1,PEX10,SLC8A1	6/236	TRUE	FALSE
7_Member	GO Biological Processes	GO:0014706	striated muscle tissue development	-2.03002	-0.360719	983,1909,2022,5339,5592,6546,26585	CDK1,EDNRA,ENG,PLEC,PRKG1,SLC8A1,GREM1	7/344	TRUE	FALSE
7_Member	GO Biological Processes	GO:0060537	muscle tissue development	-1.89925	-0.277065	983,1909,2022,5339,5592,6546,26585	CDK1,EDNRA,ENG,PLEC,PRKG1,SLC8A1,GREM1	7/365	TRUE	FALSE
7_Member	GO Biological Processes	GO:0034614	cellular response to reactive oxygen species	-1.89825	-0.276789	983,3297,5192,6546	CDK1,HSF1,PEX10,SLC8A1	4/132	TRUE	FALSE
8_Summary	GO Cellular Components	GO:0005635	nuclear envelope	-5.56201	-3.08379	311,1047,3159,4008,4925,5593,5902,6240,6277,22890,55183,64215,78994,89795,338322	ANXA11,CLGN,HMGA1,LMO7,NUCB2,PRKG2,RANBP1,RRM1,S100A6,ZBTB1,RIF1,DNAJC1,PRR14,NAV3,NLRP10	15/-	TRUE	TRUE
8_Member	GO Cellular Components	GO:0005635	nuclear envelope	-5.56201	-3.08379	311,1047,3159,4008,4925,5593,5902,6240,6277,22890,55183,64215,78994,89795,338322	ANXA11,CLGN,HMGA1,LMO7,NUCB2,PRKG2,RANBP1,RRM1,S100A6,ZBTB1,RIF1,DNAJC1,PRR14,NAV3,NLRP10	15/516	TRUE	TRUE
8_Member	GO Cellular Components	GO:0031965	nuclear membrane	-2.7431	-0.884665	3159,4925,5593,22890,55183,64215,89795,338322	HMGA1,NUCB2,PRKG2,ZBTB1,RIF1,DNAJC1,NAV3,NLRP10	8/326	TRUE	FALSE
9_Summary	GO Biological Processes	GO:0009408	response to heat	-5.46381	-2.9958	1410,2246,3297,4277,126393,286133,100507436	CRYAB,FGF1,HSF1,MICB,HSPB6,SCARA5,MICA	7/-	TRUE	TRUE
9_Member	GO Biological Processes	GO:0009408	response to heat	-5.46381	-2.9958	1410,2246,3297,4277,126393,286133,100507436	CRYAB,FGF1,HSF1,MICB,HSPB6,SCARA5,MICA	7/93	TRUE	TRUE
9_Member	GO Biological Processes	GO:0009266	response to temperature stimulus	-3.85459	-1.75172	1410,2246,3297,4277,126393,286133,100507436	CRYAB,FGF1,HSF1,MICB,HSPB6,SCARA5,MICA	7/165	TRUE	TRUE
9_Member	GO Biological Processes	GO:0034605	cellular response to heat	-2.22859	-0.514513	2246,3297,286133	FGF1,HSF1,SCARA5	3/54	TRUE	FALSE
10_Summary	GO Biological Processes	GO:0050778	positive regulation of immune response	-5.41595	-2.95508	3106,3107,3148,3263,4277,5606,7070,8061,8780,22890,55183,80328,80381,140609,154064,338322,340061,353091,100507436,836,2152,6288,8140,8482	HLA-B,HLA-C,HMGB2,HPX,MICB,MAP2K3,THY1,FOSL1,RIOK3,ZBTB1,RIF1,ULBP2,CD276,NEK7,RAET1L,NLRP10,STING1,RAET1G,MICA,CASP3,F3,SAA1,SLC7A5,SEMA7A	24/-	TRUE	TRUE
10_Member	GO Biological Processes	GO:0050778	positive regulation of immune response	-5.41595	-2.95508	3106,3107,3148,3263,4277,5606,7070,8061,8780,22890,55183,80328,80381,140609,154064,338322,340061,353091	HLA-B,HLA-C,HMGB2,HPX,MICB,MAP2K3,THY1,FOSL1,RIOK3,ZBTB1,RIF1,ULBP2,CD276,NEK7,RAET1L,NLRP10,STING1,RAET1G	18/747	TRUE	TRUE
10_Member	GO Biological Processes	GO:0045089	positive regulation of innate immune response	-3.75508	-1.6748	3107,3148,3263,5606,8061,8780,140609,338322,340061,353091	HLA-C,HMGB2,HPX,MAP2K3,FOSL1,RIOK3,NEK7,NLRP10,STING1,RAET1G	10/357	TRUE	TRUE
10_Member	GO Biological Processes	GO:0045088	regulation of innate immune response	-3.61934	-1.56708	3106,3107,3148,3263,5606,8061,8780,140609,338322,340061,353091,100507436	HLA-B,HLA-C,HMGB2,HPX,MAP2K3,FOSL1,RIOK3,NEK7,NLRP10,STING1,RAET1G,MICA	12/519	TRUE	TRUE
10_Member	GO Biological Processes	GO:0002831	regulation of response to biotic stimulus	-3.4939	-1.46061	3106,3107,3148,3263,4277,5606,8061,8780,140609,338322,340061,353091,100507436	HLA-B,HLA-C,HMGB2,HPX,MICB,MAP2K3,FOSL1,RIOK3,NEK7,NLRP10,STING1,RAET1G,MICA	13/616	TRUE	TRUE
10_Member	GO Biological Processes	GO:0002833	positive regulation of response to biotic stimulus	-3.4411	-1.42598	3107,3148,3263,5606,8061,8780,140609,338322,340061,353091	HLA-C,HMGB2,HPX,MAP2K3,FOSL1,RIOK3,NEK7,NLRP10,STING1,RAET1G	10/391	TRUE	TRUE
10_Member	GO Biological Processes	GO:0031349	positive regulation of defense response	-3.08507	-1.14496	836,3107,3148,3263,5606,8061,8780,140609,338322,340061,353091	CASP3,HLA-C,HMGB2,HPX,MAP2K3,FOSL1,RIOK3,NEK7,NLRP10,STING1,RAET1G	11/514	TRUE	FALSE
10_Member	GO Biological Processes	GO:0001819	positive regulation of cytokine production	-2.95161	-1.03624	2152,3148,6288,8140,8482,8780,80381,140609,338322,340061,353091	F3,HMGB2,SAA1,SLC7A5,SEMA7A,RIOK3,CD276,NEK7,NLRP10,STING1,RAET1G	11/534	TRUE	FALSE
10_Member	GO Biological Processes	GO:0032103	positive regulation of response to external stimulus	-2.81326	-0.939678	836,2152,3107,3148,3263,5606,8061,8780,140609,338322,340061,353091	CASP3,F3,HLA-C,HMGB2,HPX,MAP2K3,FOSL1,RIOK3,NEK7,NLRP10,STING1,RAET1G	12/642	TRUE	FALSE
10_Member	GO Biological Processes	GO:0002253	activation of immune response	-1.81015	-0.212472	4277,5606,7070,8061,80381,140609,338322,340061	MICB,MAP2K3,THY1,FOSL1,CD276,NEK7,NLRP10,STING1	8/471	TRUE	FALSE
10_Member	GO Biological Processes	GO:0002757	immune response-activating signaling pathway	-1.66699	-0.118798	4277,5606,7070,8061,80381,140609,340061	MICB,MAP2K3,THY1,FOSL1,CD276,NEK7,STING1	7/407	TRUE	FALSE
10_Member	GO Biological Processes	GO:0002218	activation of innate immune response	-1.60923	-0.0771358	5606,8061,140609,338322,340061	MAP2K3,FOSL1,NEK7,NLRP10,STING1	5/241	TRUE	FALSE
10_Member	GO Biological Processes	GO:0002764	immune response-regulating signaling pathway	-1.37357	0	4277,5606,7070,8061,80381,140609,340061	MICB,MAP2K3,THY1,FOSL1,CD276,NEK7,STING1	7/471	TRUE	FALSE
10_Member	GO Biological Processes	GO:0002221	pattern recognition receptor signaling pathway	-1.33467	0	5606,8061,140609,340061	MAP2K3,FOSL1,NEK7,STING1	4/198	TRUE	FALSE
11_Summary	GO Cellular Components	GO:0005925	focal adhesion	-5.14744	-2.74049	71,960,1464,2022,3159,4008,5339,7070,7739,9358,10580,30011,58504,312,5593,8140,121441,142680	ACTG1,CD44,CSPG4,ENG,HMGA1,LMO7,PLEC,THY1,ZNF185,ITGBL1,SORBS1,SH3KBP1,ARHGAP22,ANXA13,PRKG2,SLC7A5,NEDD1,SLC34A3	18/-	TRUE	TRUE
11_Member	GO Cellular Components	GO:0005925	focal adhesion	-5.14744	-2.74049	71,960,1464,2022,3159,4008,5339,7070,7739,9358,10580,30011,58504	ACTG1,CD44,CSPG4,ENG,HMGA1,LMO7,PLEC,THY1,ZNF185,ITGBL1,SORBS1,SH3KBP1,ARHGAP22	13/423	TRUE	TRUE
11_Member	GO Cellular Components	GO:0030055	cell-substrate junction	-5.03927	-2.67419	71,960,1464,2022,3159,4008,5339,7070,7739,9358,10580,30011,58504	ACTG1,CD44,CSPG4,ENG,HMGA1,LMO7,PLEC,THY1,ZNF185,ITGBL1,SORBS1,SH3KBP1,ARHGAP22	13/433	TRUE	TRUE
11_Member	GO Cellular Components	GO:0045177	apical part of cell	-3.00415	-1.07586	71,312,960,1464,4008,5339,5593,7070,8140,121441,142680	ACTG1,ANXA13,CD44,CSPG4,LMO7,PLEC,PRKG2,THY1,SLC7A5,NEDD1,SLC34A3	11/526	TRUE	TRUE
11_Member	GO Cellular Components	GO:0016324	apical plasma membrane	-2.05722	-0.384689	312,960,1464,4008,5593,7070,8140,142680	ANXA13,CD44,CSPG4,LMO7,PRKG2,THY1,SLC7A5,SLC34A3	8/425	TRUE	TRUE
12_Summary	GO Molecular Functions	GO:0005509	calcium ion binding	-5.12278	-2.72209	249,311,312,813,1047,3208,3241,4038,4925,6277,6546,6678,56101,57333,83988,89941,93408	ALPL,ANXA11,ANXA13,CALU,CLGN,HPCA,HPCAL1,LRP4,NUCB2,S100A6,SLC8A1,SPARC,PCDHGB5,RCN3,NCALD,RHOT2,MYL10	17/-	TRUE	TRUE
12_Member	GO Molecular Functions	GO:0005509	calcium ion binding	-5.12278	-2.72209	249,311,312,813,1047,3208,3241,4038,4925,6277,6546,6678,56101,57333,83988,89941,93408	ALPL,ANXA11,ANXA13,CALU,CLGN,HPCA,HPCAL1,LRP4,NUCB2,S100A6,SLC8A1,SPARC,PCDHGB5,RCN3,NCALD,RHOT2,MYL10	17/708	TRUE	TRUE
13_Summary	GO Cellular Components	GO:0031012	extracellular matrix	-5.07187	-2.6864	249,311,1293,1464,2152,2246,3263,4684,6277,6422,6678,8482,26585,81792,312,3481	ALPL,ANXA11,COL6A3,CSPG4,F3,FGF1,HPX,NCAM1,S100A6,SFRP1,SPARC,SEMA7A,GREM1,ADAMTS12,ANXA13,IGF2	16/-	TRUE	TRUE
13_Member	GO Cellular Components	GO:0031012	extracellular matrix	-5.07187	-2.6864	249,311,1293,1464,2152,2246,3263,4684,6277,6422,6678,8482,26585,81792	ALPL,ANXA11,COL6A3,CSPG4,F3,FGF1,HPX,NCAM1,S100A6,SFRP1,SPARC,SEMA7A,GREM1,ADAMTS12	14/497	TRUE	TRUE
13_Member	GO Cellular Components	GO:0030312	external encapsulating structure	-5.06205	-2.68485	249,311,1293,1464,2152,2246,3263,4684,6277,6422,6678,8482,26585,81792	ALPL,ANXA11,COL6A3,CSPG4,F3,FGF1,HPX,NCAM1,S100A6,SFRP1,SPARC,SEMA7A,GREM1,ADAMTS12	14/498	TRUE	TRUE
13_Member	GO Molecular Functions	GO:0044548	S100 protein binding	-3.9756	-1.84725	311,2246,6277	ANXA11,FGF1,S100A6	3/14	TRUE	TRUE
13_Member	Canonical Pathways	M5880	NABA ECM AFFILIATED	-2.95781	-1.04103	311,312,1464,3263,8482,26585	ANXA11,ANXA13,CSPG4,HPX,SEMA7A,GREM1	6/170	TRUE	TRUE
13_Member	Canonical Pathways	M5885	NABA MATRISOME ASSOCIATED	-1.85639	-0.244051	311,312,1464,2246,3263,3481,6277,6422,8482,26585,81792	ANXA11,ANXA13,CSPG4,FGF1,HPX,IGF2,S100A6,SFRP1,SEMA7A,GREM1,ADAMTS12	11/751	TRUE	TRUE
14_Summary	Reactome Gene Sets	R-HSA-2173782	Binding and Uptake of Ligands by Scavenger Receptors	-5.02405	-2.66687	338,3263,6288,6678,286133,71,311,3106,3107,30011,55823,960,2022,2246,6422,64388,6289,2950,24142,2152	APOB,HPX,SAA1,SPARC,SCARA5,ACTG1,ANXA11,HLA-B,HLA-C,SH3KBP1,VPS11,CD44,ENG,FGF1,SFRP1,GREM2,SAA2,GSTP1,NAA80,F3	20/-	TRUE	TRUE
14_Member	Reactome Gene Sets	R-HSA-2173782	Binding and Uptake of Ligands by Scavenger Receptors	-5.02405	-2.66687	338,3263,6288,6678,286133	APOB,HPX,SAA1,SPARC,SCARA5	5/42	TRUE	TRUE
14_Member	GO Cellular Components	GO:0071682	endocytic vesicle lumen	-4.78463	-2.46637	338,3263,6288,6678	APOB,HPX,SAA1,SPARC	4/23	TRUE	TRUE
14_Member	GO Cellular Components	GO:0030139	endocytic vesicle	-3.71619	-1.64266	71,311,338,3106,3107,3263,6288,6678,30011,55823	ACTG1,ANXA11,APOB,HLA-B,HLA-C,HPX,SAA1,SPARC,SH3KBP1,VPS11	10/361	TRUE	TRUE
14_Member	GO Molecular Functions	GO:0005539	glycosaminoglycan binding	-2.87201	-0.976015	338,960,2022,2246,6288,6422,64388	APOB,CD44,ENG,FGF1,SAA1,SFRP1,GREM2	7/241	TRUE	FALSE
14_Member	GO Cellular Components	GO:0034358	plasma lipoprotein particle	-2.6961	-0.85111	338,6288,6289	APOB,SAA1,SAA2	3/37	FALSE	FALSE
14_Member	GO Cellular Components	GO:1990777	lipoprotein particle	-2.6961	-0.85111	338,6288,6289	APOB,SAA1,SAA2	3/37	FALSE	FALSE
14_Member	GO Molecular Functions	GO:1901681	sulfur compound binding	-2.62048	-0.793165	338,2246,2950,6288,6422,24142,64388	APOB,FGF1,GSTP1,SAA1,SFRP1,NAA80,GREM2	7/267	TRUE	FALSE
14_Member	GO Cellular Components	GO:0032994	protein-lipid complex	-2.59824	-0.775523	338,6288,6289	APOB,SAA1,SAA2	3/40	FALSE	FALSE
14_Member	GO Molecular Functions	GO:0008201	heparin binding	-2.20943	-0.498485	338,2246,6288,6422,64388	APOB,FGF1,SAA1,SFRP1,GREM2	5/170	TRUE	FALSE
14_Member	GO Biological Processes	GO:0002526	acute inflammatory response	-1.87	-0.254961	2152,6288,6289	F3,SAA1,SAA2	3/73	FALSE	FALSE
15_Summary	GO Biological Processes	GO:0000912	assembly of actomyosin apparatus involved in cytokinesis	-4.77545	-2.46637	5339,54443,128239,311,24137,55752,285643,71,983,3849,3857,3858,10580,27295,30011,55605,121441,1909,8482,6546,9459,10397,23336,55870,5592,24142,2246,64801,3208,83988	PLEC,ANLN,IQGAP3,ANXA11,KIF4A,SEPTIN11,KIF4B,ACTG1,CDK1,KRT2,KRT9,KRT10,SORBS1,PDLIM3,SH3KBP1,KIF21A,NEDD1,EDNRA,SEMA7A,SLC8A1,ARHGEF6,NDRG1,SYNM,ASH1L,PRKG1,NAA80,FGF1,ARV1,HPCA,NCALD	30/-	TRUE	TRUE
15_Member	GO Biological Processes	GO:0000912	assembly of actomyosin apparatus involved in cytokinesis	-4.77545	-2.46637	5339,54443,128239	PLEC,ANLN,IQGAP3	3/8	TRUE	TRUE
15_Member	GO Biological Processes	GO:0000915	actomyosin contractile ring assembly	-4.77545	-2.46637	5339,54443,128239	PLEC,ANLN,IQGAP3	3/8	TRUE	TRUE
15_Member	GO Biological Processes	GO:0000910	cytokinesis	-4.66328	-2.37472	311,5339,24137,54443,55752,128239,285643	ANXA11,PLEC,KIF4A,ANLN,SEPTIN11,IQGAP3,KIF4B	7/123	TRUE	TRUE
15_Member	GO Biological Processes	GO:0044837	actomyosin contractile ring organization	-4.60154	-2.32614	5339,54443,128239	PLEC,ANLN,IQGAP3	3/9	TRUE	TRUE
15_Member	GO Biological Processes	GO:0061640	cytoskeleton-dependent cytokinesis	-3.76065	-1.67646	5339,24137,54443,55752,128239,285643	PLEC,KIF4A,ANLN,SEPTIN11,IQGAP3,KIF4B	6/120	TRUE	TRUE
15_Member	GO Biological Processes	GO:0032506	cytokinetic process	-3.6093	-1.55898	311,5339,54443,128239	ANXA11,PLEC,ANLN,IQGAP3	4/45	TRUE	TRUE
15_Member	GO Biological Processes	GO:0097435	supramolecular fiber organization	-3.32346	-1.32063	71,983,3849,3857,3858,5339,10580,27295,30011,55605,121441,128239	ACTG1,CDK1,KRT2,KRT9,KRT10,PLEC,SORBS1,PDLIM3,SH3KBP1,KIF21A,NEDD1,IQGAP3	12/560	TRUE	TRUE
15_Member	GO Biological Processes	GO:0030865	cortical cytoskeleton organization	-3.30309	-1.31052	5339,54443,55605,128239	PLEC,ANLN,KIF21A,IQGAP3	4/54	TRUE	TRUE
15_Member	GO Biological Processes	GO:0031032	actomyosin structure organization	-2.84307	-0.958338	71,5339,10580,54443,128239	ACTG1,PLEC,SORBS1,ANLN,IQGAP3	5/121	TRUE	FALSE
15_Member	GO Biological Processes	GO:0030866	cortical actin cytoskeleton organization	-2.66255	-0.825893	5339,54443,128239	PLEC,ANLN,IQGAP3	3/38	TRUE	FALSE
15_Member	GO Biological Processes	GO:0001667	ameboidal-type cell migration	-2.55284	-0.740291	1909,3849,5339,8482,54443	EDNRA,KRT2,PLEC,SEMA7A,ANLN	5/141	TRUE	FALSE
15_Member	GO Cellular Components	GO:0005911	cell-cell junction	-2.45109	-0.672866	71,6546,9459,10397,10580,23336,27295,30011,55870,128239	ACTG1,SLC8A1,ARHGEF6,NDRG1,SORBS1,SYNM,PDLIM3,SH3KBP1,ASH1L,IQGAP3	10/531	TRUE	FALSE
15_Member	GO Biological Processes	GO:0000281	mitotic cytokinesis	-2.44364	-0.671565	24137,54443,128239,285643	KIF4A,ANLN,IQGAP3,KIF4B	4/92	TRUE	FALSE
15_Member	GO Biological Processes	GO:0030036	actin cytoskeleton organization	-1.89944	-0.277065	71,5339,5592,10580,24142,27295,30011,54443,128239	ACTG1,PLEC,PRKG1,SORBS1,NAA80,PDLIM3,SH3KBP1,ANLN,IQGAP3	9/546	TRUE	FALSE
15_Member	GO Cellular Components	GO:0005938	cell cortex	-1.62724	-0.0925931	2246,54443,55605,55752,64801,128239	FGF1,ANLN,KIF21A,SEPTIN11,ARV1,IQGAP3	6/324	TRUE	FALSE
15_Member	GO Biological Processes	GO:0030029	actin filament-based process	-1.5818	-0.0565784	71,5339,5592,10580,24142,27295,30011,54443,128239	ACTG1,PLEC,PRKG1,SORBS1,NAA80,PDLIM3,SH3KBP1,ANLN,IQGAP3	9/620	TRUE	FALSE
15_Member	GO Molecular Functions	GO:0003779	actin binding	-1.48507	0	3208,5339,10580,27295,54443,83988,128239	HPCA,PLEC,SORBS1,PDLIM3,ANLN,NCALD,IQGAP3	7/445	TRUE	FALSE
15_Member	GO Biological Processes	GO:0007015	actin filament organization	-1.36535	0	5339,10580,27295,30011,128239	PLEC,SORBS1,PDLIM3,SH3KBP1,IQGAP3	5/281	TRUE	FALSE
16_Summary	GO Cellular Components	GO:0044297	cell body	-4.56684	-2.29637	338,836,1410,3208,4038,6158,6240,6509,6543,6546,6606,6607,7070,94056,320,5339,8910,55605,55752,71,24137,5575,30011	APOB,CASP3,CRYAB,HPCA,LRP4,RPL28,RRM1,SLC1A4,SLC8A2,SLC8A1,SMN1,SMN2,THY1,SYAP1,APBA1,PLEC,SGCE,KIF21A,SEPTIN11,ACTG1,KIF4A,PRKAR1B,SH3KBP1	23/-	TRUE	TRUE
16_Member	GO Cellular Components	GO:0044297	cell body	-4.56684	-2.29637	338,836,1410,3208,4038,6158,6240,6509,6543,6546,6606,6607,7070,94056	APOB,CASP3,CRYAB,HPCA,LRP4,RPL28,RRM1,SLC1A4,SLC8A2,SLC8A1,SMN1,SMN2,THY1,SYAP1	14/552	TRUE	TRUE
16_Member	GO Cellular Components	GO:0043025	neuronal cell body	-4.51446	-2.25809	338,836,1410,3208,4038,6240,6509,6543,6546,6606,6607,7070,94056	APOB,CASP3,CRYAB,HPCA,LRP4,RRM1,SLC1A4,SLC8A2,SLC8A1,SMN1,SMN2,THY1,SYAP1	13/486	TRUE	TRUE
16_Member	GO Cellular Components	GO:0030425	dendrite	-3.97594	-1.84725	320,1410,3208,4038,5339,6158,6509,6543,6546,7070,8910,55605,55752,94056	APBA1,CRYAB,HPCA,LRP4,PLEC,RPL28,SLC1A4,SLC8A2,SLC8A1,THY1,SGCE,KIF21A,SEPTIN11,SYAP1	14/627	TRUE	TRUE
16_Member	GO Cellular Components	GO:0097447	dendritic tree	-3.9615	-1.83546	320,1410,3208,4038,5339,6158,6509,6543,6546,7070,8910,55605,55752,94056	APBA1,CRYAB,HPCA,LRP4,PLEC,RPL28,SLC1A4,SLC8A2,SLC8A1,THY1,SGCE,KIF21A,SEPTIN11,SYAP1	14/629	TRUE	TRUE
16_Member	GO Cellular Components	GO:0043204	perikaryon	-3.1956	-1.23381	1410,3208,6543,6606,6607,94056	CRYAB,HPCA,SLC8A2,SMN1,SMN2,SYAP1	6/153	TRUE	FALSE
16_Member	GO Cellular Components	GO:0030424	axon	-3.18886	-1.22883	71,1410,3208,5339,6543,6546,6606,6607,7070,24137,55605,55752,94056	ACTG1,CRYAB,HPCA,PLEC,SLC8A2,SLC8A1,SMN1,SMN2,THY1,KIF4A,KIF21A,SEPTIN11,SYAP1	13/664	TRUE	FALSE
16_Member	GO Cellular Components	GO:0043197	dendritic spine	-2.19889	-0.492742	320,1410,3208,6543,55752	APBA1,CRYAB,HPCA,SLC8A2,SEPTIN11	5/171	TRUE	FALSE
16_Member	GO Cellular Components	GO:0044309	neuron spine	-2.18842	-0.484016	320,1410,3208,6543,55752	APBA1,CRYAB,HPCA,SLC8A2,SEPTIN11	5/172	TRUE	FALSE
16_Member	GO Cellular Components	GO:0098794	postsynapse	-2.14033	-0.442836	320,836,1410,3208,4038,5575,6543,6546,7070,30011,55752,94056	APBA1,CASP3,CRYAB,HPCA,LRP4,PRKAR1B,SLC8A2,SLC8A1,THY1,SH3KBP1,SEPTIN11,SYAP1	12/780	TRUE	FALSE
16_Member	GO Cellular Components	GO:0150034	distal axon	-1.90624	-0.277576	71,6543,6546,7070,55605,94056	ACTG1,SLC8A2,SLC8A1,THY1,KIF21A,SYAP1	6/280	TRUE	FALSE
17_Summary	GO Biological Processes	GO:1901699	cellular response to nitrogen compound	-4.56215	-2.29637	338,836,1909,2950,3208,3297,3481,3488,5313,6546,8140,8780,10580,94056,340061,249,6422,1645,79602,6277,5339,6721	APOB,CASP3,EDNRA,GSTP1,HPCA,HSF1,IGF2,IGFBP5,PKLR,SLC8A1,SLC7A5,RIOK3,SORBS1,SYAP1,STING1,ALPL,SFRP1,AKR1C1,ADIPOR2,S100A6,PLEC,SREBF2	22/-	TRUE	TRUE
17_Member	GO Biological Processes	GO:1901699	cellular response to nitrogen compound	-4.56215	-2.29637	338,836,1909,2950,3208,3297,3481,3488,5313,6546,8140,8780,10580,94056,340061	APOB,CASP3,EDNRA,GSTP1,HPCA,HSF1,IGF2,IGFBP5,PKLR,SLC8A1,SLC7A5,RIOK3,SORBS1,SYAP1,STING1	15/627	TRUE	TRUE
17_Member	GO Biological Processes	GO:0043434	response to peptide hormone	-2.74105	-0.883859	249,1909,2950,3297,3481,3488,5313,10580,94056	ALPL,EDNRA,GSTP1,HSF1,IGF2,IGFBP5,PKLR,SORBS1,SYAP1	9/403	TRUE	FALSE
17_Member	GO Biological Processes	GO:0071375	cellular response to peptide hormone stimulus	-2.50612	-0.713073	1909,2950,3297,3481,5313,10580,94056	EDNRA,GSTP1,HSF1,IGF2,PKLR,SORBS1,SYAP1	7/280	TRUE	FALSE
17_Member	GO Biological Processes	GO:0007584	response to nutrient	-2.3307	-0.591299	249,2950,3297,5313,6422	ALPL,GSTP1,HSF1,PKLR,SFRP1	5/159	TRUE	FALSE
17_Member	GO Biological Processes	GO:0032868	response to insulin	-2.32262	-0.586285	249,2950,3481,5313,10580,94056	ALPL,GSTP1,IGF2,PKLR,SORBS1,SYAP1	6/228	TRUE	FALSE
17_Member	GO Biological Processes	GO:0032869	cellular response to insulin stimulus	-2.29664	-0.565306	2950,3481,5313,10580,94056	GSTP1,IGF2,PKLR,SORBS1,SYAP1	5/162	TRUE	FALSE
17_Member	GO Biological Processes	GO:0032870	cellular response to hormone stimulus	-2.28034	-0.552703	1645,1909,2950,3297,3481,5313,6422,10580,79602,94056	AKR1C1,EDNRA,GSTP1,HSF1,IGF2,PKLR,SFRP1,SORBS1,ADIPOR2,SYAP1	10/562	TRUE	FALSE
17_Member	GO Biological Processes	GO:0033273	response to vitamin	-1.70816	-0.147639	249,2950,6422	ALPL,GSTP1,SFRP1	3/84	TRUE	FALSE
17_Member	GO Biological Processes	GO:0048145	regulation of fibroblast proliferation	-1.58113	-0.0565784	2950,6277,6422	GSTP1,S100A6,SFRP1	3/94	TRUE	FALSE
17_Member	GO Biological Processes	GO:0031667	response to nutrient levels	-1.51234	-0.00581371	249,2950,3297,5313,5339,6422,6721,8140	ALPL,GSTP1,HSF1,PKLR,PLEC,SFRP1,SREBF2,SLC7A5	8/537	TRUE	FALSE
18_Summary	GO Cellular Components	GO:0030018	Z disc	-4.42381	-2.18268	1410,5339,6546,6606,6607,27295,57158,71,23336,813	CRYAB,PLEC,SLC8A1,SMN1,SMN2,PDLIM3,JPH2,ACTG1,SYNM,CALU	10/-	TRUE	TRUE
18_Member	GO Cellular Components	GO:0030018	Z disc	-4.42381	-2.18268	1410,5339,6546,6606,6607,27295,57158	CRYAB,PLEC,SLC8A1,SMN1,SMN2,PDLIM3,JPH2	7/134	TRUE	TRUE
18_Member	GO Cellular Components	GO:0030016	myofibril	-4.34282	-2.1135	71,1410,5339,6546,6606,6607,23336,27295,57158	ACTG1,CRYAB,PLEC,SLC8A1,SMN1,SMN2,SYNM,PDLIM3,JPH2	9/243	TRUE	TRUE
18_Member	GO Cellular Components	GO:0043292	contractile muscle fiber	-4.20778	-2.00394	71,1410,5339,6546,6606,6607,23336,27295,57158	ACTG1,CRYAB,PLEC,SLC8A1,SMN1,SMN2,SYNM,PDLIM3,JPH2	9/253	TRUE	TRUE
18_Member	GO Cellular Components	GO:0031674	I band	-4.11298	-1.94092	1410,5339,6546,6606,6607,27295,57158	CRYAB,PLEC,SLC8A1,SMN1,SMN2,PDLIM3,JPH2	7/150	TRUE	TRUE
18_Member	GO Cellular Components	GO:0030017	sarcomere	-3.07833	-1.14121	1410,5339,6546,6606,6607,27295,57158	CRYAB,PLEC,SLC8A1,SMN1,SMN2,PDLIM3,JPH2	7/222	TRUE	FALSE
18_Member	GO Cellular Components	GO:0016528	sarcoplasm	-1.52347	-0.0141777	813,5339,57158	CALU,PLEC,JPH2	3/99	TRUE	FALSE
19_Summary	Reactome Gene Sets	R-HSA-8856688	Golgi-to-ER retrograde transport	-4.42381	-2.18268	3832,5049,11015,24137,55605,79861,285643,71,338,3263,6288,6678,30011,286133,93408,5575,4684,1293,6158,6166,6721,8482,10580,29128,983,10397,89795,140609,320,55870,89941,2950,3208	KIF11,PAFAH1B2,KDELR3,KIF4A,KIF21A,TUBAL3,KIF4B,ACTG1,APOB,HPX,SAA1,SPARC,SH3KBP1,SCARA5,MYL10,PRKAR1B,NCAM1,COL6A3,RPL28,RPL36AL,SREBF2,SEMA7A,SORBS1,UHRF1,CDK1,NDRG1,NAV3,NEK7,APBA1,ASH1L,RHOT2,GSTP1,HPCA	33/-	TRUE	TRUE
19_Member	Reactome Gene Sets	R-HSA-8856688	Golgi-to-ER retrograde transport	-4.42381	-2.18268	3832,5049,11015,24137,55605,79861,285643	KIF11,PAFAH1B2,KDELR3,KIF4A,KIF21A,TUBAL3,KIF4B	7/134	TRUE	TRUE
19_Member	Reactome Gene Sets	R-HSA-983189	Kinesins	-4.22469	-2.01808	3832,24137,55605,79861,285643	KIF11,KIF4A,KIF21A,TUBAL3,KIF4B	5/61	TRUE	TRUE
19_Member	Reactome Gene Sets	R-HSA-6811434	COPI-dependent Golgi-to-ER retrograde traffic	-4.19832	-1.99722	3832,11015,24137,55605,79861,285643	KIF11,KDELR3,KIF4A,KIF21A,TUBAL3,KIF4B	6/100	TRUE	TRUE
19_Member	GO Biological Processes	GO:0051231	spindle elongation	-4.07816	-1.9162	3832,24137,285643	KIF11,KIF4A,KIF4B	3/13	FALSE	TRUE
19_Member	Reactome Gene Sets	R-HSA-5653656	Vesicle-mediated transport	-3.65248	-1.5924	71,338,3263,3832,5049,6288,6678,11015,24137,30011,55605,79861,285643,286133	ACTG1,APOB,HPX,KIF11,PAFAH1B2,SAA1,SPARC,KDELR3,KIF4A,SH3KBP1,KIF21A,TUBAL3,KIF4B,SCARA5	14/674	TRUE	TRUE
19_Member	Reactome Gene Sets	R-HSA-437239	Recycling pathway of L1	-3.46557	-1.44168	71,24137,79861,285643	ACTG1,KIF4A,TUBAL3,KIF4B	4/49	TRUE	TRUE
19_Member	KEGG Pathway	hsa04814	Motor proteins	-3.38539	-1.37382	71,3832,24137,55605,79861,93408,285643	ACTG1,KIF11,KIF4A,KIF21A,TUBAL3,MYL10,KIF4B	7/197	TRUE	TRUE
19_Member	Reactome Gene Sets	R-HSA-6811442	Intra-Golgi and retrograde Golgi-to-ER traffic	-3.30755	-1.31159	3832,5049,11015,24137,55605,79861,285643	KIF11,PAFAH1B2,KDELR3,KIF4A,KIF21A,TUBAL3,KIF4B	7/203	TRUE	TRUE
19_Member	Reactome Gene Sets	R-HSA-983231	Factors involved in megakaryocyte development and platelet production	-2.95781	-1.04103	3832,5575,24137,55605,79861,285643	KIF11,PRKAR1B,KIF4A,KIF21A,TUBAL3,KIF4B	6/170	TRUE	FALSE
19_Member	GO Molecular Functions	GO:0003777	microtubule motor activity	-2.92434	-1.016	3832,24137,55605,285643	KIF11,KIF4A,KIF21A,KIF4B	4/68	TRUE	FALSE
19_Member	Reactome Gene Sets	R-HSA-373760	L1CAM interactions	-2.85904	-0.965738	71,4684,24137,79861,285643	ACTG1,NCAM1,KIF4A,TUBAL3,KIF4B	5/120	TRUE	FALSE
19_Member	Reactome Gene Sets	R-HSA-9675108	Nervous system development	-2.79428	-0.921975	71,1293,4684,6158,6166,6721,8482,24137,30011,79861,285643	ACTG1,COL6A3,NCAM1,RPL28,RPL36AL,SREBF2,SEMA7A,KIF4A,SH3KBP1,TUBAL3,KIF4B	11/559	TRUE	FALSE
19_Member	GO Cellular Components	GO:0016363	nuclear matrix	-2.69143	-0.848834	6678,10580,24137,29128,285643	SPARC,SORBS1,KIF4A,UHRF1,KIF4B	5/131	TRUE	FALSE
19_Member	GO Cellular Components	GO:0005874	microtubule	-2.68737	-0.845964	983,3832,6288,10397,24137,55605,79861,89795,140609,285643	CDK1,KIF11,SAA1,NDRG1,KIF4A,KIF21A,TUBAL3,NAV3,NEK7,KIF4B	10/492	TRUE	FALSE
19_Member	Reactome Gene Sets	R-HSA-422475	Axon guidance	-2.43394	-0.665602	71,1293,4684,6158,6166,8482,24137,30011,79861,285643	ACTG1,COL6A3,NCAM1,RPL28,RPL36AL,SEMA7A,KIF4A,SH3KBP1,TUBAL3,KIF4B	10/534	TRUE	FALSE
19_Member	GO Molecular Functions	GO:0003774	cytoskeletal motor activity	-2.11547	-0.424779	3832,24137,55605,285643	KIF11,KIF4A,KIF21A,KIF4B	4/114	TRUE	FALSE
19_Member	GO Molecular Functions	GO:0120544	polypeptide conformation or assembly isomerase activity	-2.00211	-0.342328	3832,24137,55605,285643	KIF11,KIF4A,KIF21A,KIF4B	4/123	TRUE	FALSE
19_Member	Reactome Gene Sets	R-HSA-2132295	MHC class II antigen presentation	-1.9665	-0.316814	3832,24137,79861,285643	KIF11,KIF4A,TUBAL3,KIF4B	4/126	TRUE	FALSE
19_Member	Reactome Gene Sets	R-HSA-199991	Membrane Trafficking	-1.92843	-0.289836	71,338,3832,5049,11015,24137,30011,55605,79861,285643	ACTG1,APOB,KIF11,PAFAH1B2,KDELR3,KIF4A,SH3KBP1,KIF21A,TUBAL3,KIF4B	10/635	TRUE	FALSE
19_Member	GO Biological Processes	GO:0007018	microtubule-based movement	-1.86595	-0.251613	320,338,3832,24137,55605,55870,89941,285643	APBA1,APOB,KIF11,KIF4A,KIF21A,ASH1L,RHOT2,KIF4B	8/460	TRUE	FALSE
19_Member	GO Molecular Functions	GO:0051540	metal cluster binding	-1.79317	-0.201572	2950,24137,285643	GSTP1,KIF4A,KIF4B	3/78	FALSE	FALSE
19_Member	GO Biological Processes	GO:0008088	axo-dendritic transport	-1.76401	-0.18479	320,24137,55605	APBA1,KIF4A,KIF21A	3/80	TRUE	FALSE
19_Member	GO Cellular Components	GO:0005875	microtubule associated complex	-1.6499	-0.108336	3832,24137,55605,285643	KIF11,KIF4A,KIF21A,KIF4B	4/157	TRUE	FALSE
19_Member	GO Cellular Components	GO:0120111	neuron projection cytoplasm	-1.62994	-0.09432	3208,24137,55605	HPCA,KIF4A,KIF21A	3/90	TRUE	FALSE
19_Member	GO Biological Processes	GO:0010970	transport along microtubule	-1.49982	0	320,24137,55605,89941	APBA1,KIF4A,KIF21A,RHOT2	4/175	TRUE	FALSE
19_Member	GO Biological Processes	GO:0030705	cytoskeleton-dependent intracellular transport	-1.30852	0	320,24137,55605,89941	APBA1,KIF4A,KIF21A,RHOT2	4/202	TRUE	FALSE
20_Summary	GO Cellular Components	GO:0042383	sarcolemma	-4.32228	-2.09587	1293,5339,5592,6543,6546,8910,23336,338,5593,71,1909,6510,142680	COL6A3,PLEC,PRKG1,SLC8A2,SLC8A1,SGCE,SYNM,APOB,PRKG2,ACTG1,EDNRA,SLC1A5,SLC34A3	13/-	TRUE	TRUE
20_Member	GO Cellular Components	GO:0042383	sarcolemma	-4.32228	-2.09587	1293,5339,5592,6543,6546,8910,23336	COL6A3,PLEC,PRKG1,SLC8A2,SLC8A1,SGCE,SYNM	7/139	TRUE	TRUE
20_Member	Reactome Gene Sets	R-HSA-418346	Platelet homeostasis	-3.47033	-1.44258	338,5592,5593,6543,6546	APOB,PRKG1,PRKG2,SLC8A2,SLC8A1	5/88	TRUE	TRUE
20_Member	KEGG Pathway	hsa05412	Arrhythmogenic right ventricular cardiomyopathy	-2.54918	-0.73885	71,6543,6546,8910	ACTG1,SLC8A2,SLC8A1,SGCE	4/86	TRUE	FALSE
20_Member	KEGG Pathway	hsa05410	Hypertrophic cardiomyopathy	-2.3301	-0.591299	71,6543,6546,8910	ACTG1,SLC8A2,SLC8A1,SGCE	4/99	TRUE	FALSE
20_Member	KEGG Pathway	hsa04022	cGMP-PKG signaling pathway	-2.25239	-0.530605	1909,5592,5593,6543,6546	EDNRA,PRKG1,PRKG2,SLC8A2,SLC8A1	5/166	TRUE	FALSE
20_Member	KEGG Pathway	hsa04974	Protein digestion and absorption	-2.23996	-0.52409	1293,6510,6543,6546	COL6A3,SLC1A5,SLC8A2,SLC8A1	4/105	TRUE	FALSE
20_Member	KEGG Pathway	hsa05414	Dilated cardiomyopathy	-2.23996	-0.52409	71,6543,6546,8910	ACTG1,SLC8A2,SLC8A1,SGCE	4/105	TRUE	FALSE
20_Member	KEGG Pathway	hsa04978	Mineral absorption	-2.08194	-0.399598	6543,6546,142680	SLC8A2,SLC8A1,SLC34A3	3/61	FALSE	FALSE
20_Member	GO Cellular Components	GO:0043679	axon terminus	-1.36951	0	71,6543,6546	ACTG1,SLC8A2,SLC8A1	3/114	FALSE	FALSE

## Sheet: Downregulated proteins
GroupID	Category	Term	Description	LogP	Log(q-value)	Genes	Symbols	InTerm_InList	≥ 3 Unambiguously mapped proteins	Q-value < 0.05
1_Summary	GO Cellular Components	GO:0031012	extracellular matrix	-20.407	-16.2797	307,633,1278,1280,1282,1284,1286,1289,1301,1307,1462,1520,2312,2335,3339,3383,3897,3909,3911,3918,3959,4054,4237,4313,4811,5270,5654,6275,7059,8722,10417,11096,22795,23213,27286,64129,78987,649,780,3685,3690,50848,84695,527,3105,3106,3107,4599,4600,6772,9368,9636,358,3855,2131,2621,6692,1264,567,2882,4241,10954,11098,1759,3709,5777,26999,5332,1803,2674,6712,2149,4170,2950,2953,5371,653689,949	ANXA4,BGN,COL1A2,COL2A1,COL4A1,COL4A2,COL4A4,COL5A1,COL11A1,COL16A1,VCAN,CTSS,FLG,FN1,HSPG2,ICAM1,L1CAM,LAMA3,LAMA5,LAMC2,LGALS3BP,LTBP3,MFAP2,MMP2,NID1,SERPINE2,HTRA1,S100A4,THBS3,CTSF,SPON2,ADAMTS5,NID2,SULF1,SRPX2,TINAGL1,CRELD1,BMP1,DDR1,ITGAV,ITGB3,F11R,LOXL3,ATP6V0C,HLA-A,HLA-B,HLA-C,MX1,MX2,STAT1,NHERF1,ISG15,AQP1,KRT7,EXT1,GAS6,SPINT1,CNN1,B2M,GPX7,MELTF,PDIA5,PRSS23,DNM1,ITPR2,PTPN6,CYFI…	78/-	TRUE	TRUE
1_Member	GO Cellular Components	GO:0031012	extracellular matrix	-20.407	-16.2797	307,633,1278,1280,1282,1284,1286,1289,1301,1307,1462,1520,2312,2335,3339,3383,3897,3909,3911,3918,3959,4054,4237,4313,4811,5270,5654,6275,7059,8722,10417,11096,22795,23213,27286,64129,78987	ANXA4,BGN,COL1A2,COL2A1,COL4A1,COL4A2,COL4A4,COL5A1,COL11A1,COL16A1,VCAN,CTSS,FLG,FN1,HSPG2,ICAM1,L1CAM,LAMA3,LAMA5,LAMC2,LGALS3BP,LTBP3,MFAP2,MMP2,NID1,SERPINE2,HTRA1,S100A4,THBS3,CTSF,SPON2,ADAMTS5,NID2,SULF1,SRPX2,TINAGL1,CRELD1	37/497	TRUE	TRUE
1_Member	GO Cellular Components	GO:0030312	external encapsulating structure	-20.3773	-16.2797	307,633,1278,1280,1282,1284,1286,1289,1301,1307,1462,1520,2312,2335,3339,3383,3897,3909,3911,3918,3959,4054,4237,4313,4811,5270,5654,6275,7059,8722,10417,11096,22795,23213,27286,64129,78987	ANXA4,BGN,COL1A2,COL2A1,COL4A1,COL4A2,COL4A4,COL5A1,COL11A1,COL16A1,VCAN,CTSS,FLG,FN1,HSPG2,ICAM1,L1CAM,LAMA3,LAMA5,LAMC2,LGALS3BP,LTBP3,MFAP2,MMP2,NID1,SERPINE2,HTRA1,S100A4,THBS3,CTSF,SPON2,ADAMTS5,NID2,SULF1,SRPX2,TINAGL1,CRELD1	37/498	TRUE	TRUE
1_Member	Reactome Gene Sets	R-HSA-1474244	Extracellular matrix organization	-19.4745	-15.553	633,649,780,1278,1280,1282,1284,1286,1289,1301,1307,1462,1520,2335,3339,3383,3685,3690,3909,3911,3918,4054,4237,4313,4811,5654,11096,22795,50848,84695	BGN,BMP1,DDR1,COL1A2,COL2A1,COL4A1,COL4A2,COL4A4,COL5A1,COL11A1,COL16A1,VCAN,CTSS,FN1,HSPG2,ICAM1,ITGAV,ITGB3,LAMA3,LAMA5,LAMC2,LTBP3,MFAP2,MMP2,NID1,HTRA1,ADAMTS5,NID2,F11R,LOXL3	30/318	TRUE	TRUE
1_Member	GO Molecular Functions	GO:0005201	extracellular matrix structural constituent	-17.0615	-13.2649	633,1278,1280,1282,1284,1286,1289,1301,1307,1462,2335,3339,3909,3911,3918,4237,4811,7059,22795,27286,64129,78987	BGN,COL1A2,COL2A1,COL4A1,COL4A2,COL4A4,COL5A1,COL11A1,COL16A1,VCAN,FN1,HSPG2,LAMA3,LAMA5,LAMC2,MFAP2,NID1,THBS3,NID2,SRPX2,TINAGL1,CRELD1	22/175	TRUE	TRUE
1_Member	Reactome Gene Sets	R-HSA-1474228	Degradation of the extracellular matrix	-15.5549	-11.8792	649,1278,1280,1282,1284,1286,1289,1301,1307,1520,2335,3339,3909,3911,3918,4313,4811,5654,11096	BMP1,COL1A2,COL2A1,COL4A1,COL4A2,COL4A4,COL5A1,COL11A1,COL16A1,CTSS,FN1,HSPG2,LAMA3,LAMA5,LAMC2,MMP2,NID1,HTRA1,ADAMTS5	19/138	TRUE	TRUE
1_Member	Reactome Gene Sets	R-HSA-3000171	Non-integrin membrane-ECM interactions	-14.4648	-10.9112	780,1278,1280,1282,1284,1286,1289,1301,2335,3339,3685,3690,3909,3911,3918	DDR1,COL1A2,COL2A1,COL4A1,COL4A2,COL4A4,COL5A1,COL11A1,FN1,HSPG2,ITGAV,ITGB3,LAMA3,LAMA5,LAMC2	15/80	TRUE	TRUE
1_Member	Reactome Gene Sets	R-HSA-3000178	ECM proteoglycans	-13.4253	-9.98094	633,1278,1280,1282,1284,1286,1289,1462,2335,3339,3685,3690,3909,3911	BGN,COL1A2,COL2A1,COL4A1,COL4A2,COL4A4,COL5A1,VCAN,FN1,HSPG2,ITGAV,ITGB3,LAMA3,LAMA5	14/76	TRUE	TRUE
1_Member	Reactome Gene Sets	R-HSA-3000157	Laminin interactions	-12.5839	-9.22664	1282,1284,1286,3339,3685,3909,3911,3918,4811,22795	COL4A1,COL4A2,COL4A4,HSPG2,ITGAV,LAMA3,LAMA5,LAMC2,NID1,NID2	10/30	TRUE	TRUE
1_Member	Reactome Gene Sets	R-HSA-2022090	Assembly of collagen fibrils and other multimeric structures	-12.0406	-8.8724	649,1278,1280,1282,1284,1286,1289,1301,1520,3909,3918,84695	BMP1,COL1A2,COL2A1,COL4A1,COL4A2,COL4A4,COL5A1,COL11A1,CTSS,LAMA3,LAMC2,LOXL3	12/60	TRUE	TRUE
1_Member	Reactome Gene Sets	R-HSA-216083	Integrin cell surface interactions	-11.4905	-8.37065	1278,1280,1282,1284,1286,1289,1307,2335,3339,3383,3685,3690,50848	COL1A2,COL2A1,COL4A1,COL4A2,COL4A4,COL5A1,COL16A1,FN1,HSPG2,ICAM1,ITGAV,ITGB3,F11R	13/84	TRUE	TRUE
1_Member	Reactome Gene Sets	R-HSA-1474290	Collagen formation	-11.1587	-8.08231	649,1278,1280,1282,1284,1286,1289,1301,1307,1520,3909,3918,84695	BMP1,COL1A2,COL2A1,COL4A1,COL4A2,COL4A4,COL5A1,COL11A1,COL16A1,CTSS,LAMA3,LAMC2,LOXL3	13/89	TRUE	TRUE
1_Member	KEGG Pathway	hsa04512	ECM-receptor interaction	-11.1587	-8.08231	1278,1280,1282,1284,1286,2335,3339,3685,3690,3909,3911,3918,7059	COL1A2,COL2A1,COL4A1,COL4A2,COL4A4,FN1,HSPG2,ITGAV,ITGB3,LAMA3,LAMA5,LAMC2,THBS3	13/89	TRUE	TRUE
1_Member	GO Cellular Components	GO:0005604	basement membrane	-10.4982	-7.47982	1280,1282,1284,1286,1289,1307,2335,3339,3909,3911,3918,4811,22795	COL2A1,COL4A1,COL4A2,COL4A4,COL5A1,COL16A1,FN1,HSPG2,LAMA3,LAMA5,LAMC2,NID1,NID2	13/100	TRUE	TRUE
1_Member	KEGG Pathway	hsa05165	Human papillomavirus infection	-10.3848	-7.40116	527,1278,1280,1282,1284,1286,2335,3105,3106,3107,3685,3690,3909,3911,3918,4599,4600,6772,7059,9368,9636	ATP6V0C,COL1A2,COL2A1,COL4A1,COL4A2,COL4A4,FN1,HLA-A,HLA-B,HLA-C,ITGAV,ITGB3,LAMA3,LAMA5,LAMC2,MX1,MX2,STAT1,THBS3,NHERF1,ISG15	21/333	TRUE	TRUE
1_Member	Reactome Gene Sets	R-HSA-9638630	Attachment of bacteria to epithelial cells	-10.3426	-7.39116	1282,1284,1286,1289,2335,3909,3911,3918	COL4A1,COL4A2,COL4A4,COL5A1,FN1,LAMA3,LAMA5,LAMC2	8/23	TRUE	TRUE
1_Member	Reactome Gene Sets	R-HSA-9931953	Biofilm formation	-10.3426	-7.39116	1282,1284,1286,1289,2335,3909,3911,3918	COL4A1,COL4A2,COL4A4,COL5A1,FN1,LAMA3,LAMA5,LAMC2	8/23	TRUE	TRUE
1_Member	Reactome Gene Sets	R-HSA-9925563	Developmental Lineage of Pancreatic Ductal Cells	-10.3163	-7.38007	358,1278,1280,1289,1301,2335,3855,3909,3911,3918	AQP1,COL1A2,COL2A1,COL5A1,COL11A1,FN1,KRT7,LAMA3,LAMA5,LAMC2	10/48	TRUE	TRUE
1_Member	Reactome Gene Sets	R-HSA-2214320	Anchoring fibril formation	-10.1954	-7.2881	649,1278,1282,1284,1286,3909,3918	BMP1,COL1A2,COL4A1,COL4A2,COL4A4,LAMA3,LAMC2	7/15	TRUE	TRUE
1_Member	Reactome Gene Sets	R-HSA-9640148	Infection with Enterobacteria	-9.85088	-6.9574	1282,1284,1286,1289,2335,3909,3911,3918	COL4A1,COL4A2,COL4A4,COL5A1,FN1,LAMA3,LAMA5,LAMC2	8/26	TRUE	TRUE
1_Member	GO Cellular Components	GO:0098644	complex of collagen trimers	-9.70211	-6.83496	1278,1280,1282,1284,1286,1289,1301,1307	COL1A2,COL2A1,COL4A1,COL4A2,COL4A4,COL5A1,COL11A1,COL16A1	8/27	TRUE	TRUE
1_Member	GO Biological Processes	GO:0030198	extracellular matrix organization	-9.31552	-6.48509	649,1278,1280,1282,1284,1286,1289,1301,1520,2131,2621,4313,4811,6692,11096,22795,23213,84695	BMP1,COL1A2,COL2A1,COL4A1,COL4A2,COL4A4,COL5A1,COL11A1,CTSS,EXT1,GAS6,MMP2,NID1,SPINT1,ADAMTS5,NID2,SULF1,LOXL3	18/272	TRUE	TRUE
1_Member	Reactome Gene Sets	R-HSA-8874081	MET activates PTK2 signaling	-9.29263	-6.4823	1278,1280,1289,1301,2335,3909,3911,3918	COL1A2,COL2A1,COL5A1,COL11A1,FN1,LAMA3,LAMA5,LAMC2	8/30	TRUE	TRUE
1_Member	GO Biological Processes	GO:0043062	extracellular structure organization	-9.28987	-6.4823	649,1278,1280,1282,1284,1286,1289,1301,1520,2131,2621,4313,4811,6692,11096,22795,23213,84695	BMP1,COL1A2,COL2A1,COL4A1,COL4A2,COL4A4,COL5A1,COL11A1,CTSS,EXT1,GAS6,MMP2,NID1,SPINT1,ADAMTS5,NID2,SULF1,LOXL3	18/273	TRUE	TRUE
1_Member	GO Biological Processes	GO:0045229	external encapsulating structure organization	-9.2389	-6.45305	649,1278,1280,1282,1284,1286,1289,1301,1520,2131,2621,4313,4811,6692,11096,22795,23213,84695	BMP1,COL1A2,COL2A1,COL4A1,COL4A2,COL4A4,COL5A1,COL11A1,CTSS,EXT1,GAS6,MMP2,NID1,SPINT1,ADAMTS5,NID2,SULF1,LOXL3	18/275	TRUE	TRUE
1_Member	Reactome Gene Sets	R-HSA-1566977	Fibronectin matrix formation	-9.13349	-6.37831	1278,1280,1282,1284,1286,1289,2335	COL1A2,COL2A1,COL4A1,COL4A2,COL4A4,COL5A1,FN1	7/20	TRUE	TRUE
1_Member	Reactome Gene Sets	R-HSA-8875878	MET promotes cell motility	-8.12201	-5.47925	1278,1280,1289,1301,2335,3909,3911,3918	COL1A2,COL2A1,COL5A1,COL11A1,FN1,LAMA3,LAMA5,LAMC2	8/41	TRUE	TRUE
1_Member	GO Molecular Functions	GO:0030020	extracellular matrix structural constituent conferring tensile strength	-8.03408	-5.42078	1278,1280,1282,1284,1286,1289,1301,1307	COL1A2,COL2A1,COL4A1,COL4A2,COL4A4,COL5A1,COL11A1,COL16A1	8/42	TRUE	TRUE
1_Member	Reactome Gene Sets	R-HSA-8948216	Collagen chain trimerization	-7.8652	-5.27948	1278,1280,1282,1284,1286,1289,1301,1307	COL1A2,COL2A1,COL4A1,COL4A2,COL4A4,COL5A1,COL11A1,COL16A1	8/44	TRUE	TRUE
1_Member	Reactome Gene Sets	R-HSA-9820448	Developmental Cell Lineages of the Exocrine Pancreas	-7.83124	-5.26511	358,1278,1280,1289,1301,2335,3855,3909,3911,3918	AQP1,COL1A2,COL2A1,COL5A1,COL11A1,FN1,KRT7,LAMA3,LAMA5,LAMC2	10/84	TRUE	TRUE
1_Member	Reactome Gene Sets	R-HSA-1442490	Collagen degradation	-7.75199	-5.20319	1278,1280,1282,1284,1286,1289,1301,1307,4313	COL1A2,COL2A1,COL4A1,COL4A2,COL4A4,COL5A1,COL11A1,COL16A1,MMP2	9/64	TRUE	TRUE
1_Member	Reactome Gene Sets	R-HSA-2243919	Crosslinking of collagen fibrils	-7.74918	-5.20319	649,1278,1282,1284,1286,84695	BMP1,COL1A2,COL4A1,COL4A2,COL4A4,LOXL3	6/18	TRUE	TRUE
1_Member	Reactome Gene Sets	R-HSA-9734767	Developmental Cell Lineages	-7.7445	-5.20319	358,1264,1278,1280,1289,1301,2312,2335,3855,3909,3911,3918	AQP1,CNN1,COL1A2,COL2A1,COL5A1,COL11A1,FLG,FN1,KRT7,LAMA3,LAMA5,LAMC2	12/137	TRUE	TRUE
1_Member	Reactome Gene Sets	R-HSA-1650814	Collagen biosynthesis and modifying enzymes	-7.57256	-5.04315	649,1278,1280,1282,1284,1286,1289,1301,1307	BMP1,COL1A2,COL2A1,COL4A1,COL4A2,COL4A4,COL5A1,COL11A1,COL16A1	9/67	TRUE	TRUE
1_Member	GO Cellular Components	GO:0005788	endoplasmic reticulum lumen	-7.43062	-4.92408	567,1278,1280,1282,1284,1286,1289,1301,1307,1462,2335,2621,2882,4241,10954,11096,11098	B2M,COL1A2,COL2A1,COL4A1,COL4A2,COL4A4,COL5A1,COL11A1,COL16A1,VCAN,FN1,GAS6,GPX7,MELTF,PDIA5,ADAMTS5,PRSS23	17/319	TRUE	TRUE
1_Member	Reactome Gene Sets	R-HSA-6806834	Signaling by MET	-6.93651	-4.52465	1278,1280,1289,1301,2335,3909,3911,3918,6692	COL1A2,COL2A1,COL5A1,COL11A1,FN1,LAMA3,LAMA5,LAMC2,SPINT1	9/79	TRUE	TRUE
1_Member	Reactome Gene Sets	R-HSA-9006934	Signaling by Receptor Tyrosine Kinases	-6.79601	-4.41718	527,1278,1280,1282,1284,1286,1289,1301,1759,2335,3685,3690,3709,3909,3911,3918,5777,6692,6772,7059,26999	ATP6V0C,COL1A2,COL2A1,COL4A1,COL4A2,COL4A4,COL5A1,COL11A1,DNM1,FN1,ITGAV,ITGB3,ITPR2,LAMA3,LAMA5,LAMC2,PTPN6,SPINT1,STAT1,THBS3,CYFIP2	21/532	TRUE	TRUE
1_Member	Reactome Gene Sets	R-HSA-9824439	Bacterial Infection Pathways	-6.16444	-3.89614	567,1282,1284,1286,1289,2335,3909,3911,3918	B2M,COL4A1,COL4A2,COL4A4,COL5A1,FN1,LAMA3,LAMA5,LAMC2	9/97	TRUE	TRUE
1_Member	KEGG Pathway	hsa04933	AGE-RAGE signaling pathway in diabetic complications	-6.01516	-3.7955	1278,1282,1284,1286,2335,3383,4313,5332,6772	COL1A2,COL4A1,COL4A2,COL4A4,FN1,ICAM1,MMP2,PLCB4,STAT1	9/101	TRUE	TRUE
1_Member	KEGG Pathway	hsa05146	Amoebiasis	-5.94305	-3.74854	1278,1282,1284,1286,2335,3909,3911,3918,5332	COL1A2,COL4A1,COL4A2,COL4A4,FN1,LAMA3,LAMA5,LAMC2,PLCB4	9/103	TRUE	TRUE
1_Member	KEGG Pathway	hsa04510	Focal adhesion	-5.88287	-3.70475	1278,1280,1282,1284,1286,2335,3685,3690,3909,3911,3918,7059	COL1A2,COL2A1,COL4A1,COL4A2,COL4A4,FN1,ITGAV,ITGB3,LAMA3,LAMA5,LAMC2,THBS3	12/203	TRUE	TRUE
1_Member	KEGG Pathway	hsa04974	Protein digestion and absorption	-5.87254	-3.69921	1278,1280,1282,1284,1286,1289,1301,1307,1803	COL1A2,COL2A1,COL4A1,COL4A2,COL4A4,COL5A1,COL11A1,COL16A1,DPP4	9/105	TRUE	TRUE
1_Member	Reactome Gene Sets	R-HSA-186797	Signaling by PDGF	-5.6887	-3.55299	1280,1282,1284,1286,1289,6772,7059	COL2A1,COL4A1,COL4A2,COL4A4,COL5A1,STAT1,THBS3	7/58	TRUE	TRUE
1_Member	GO Cellular Components	GO:0005581	collagen trimer	-5.5498	-3.42531	1278,1280,1282,1284,1286,1289,1301,1307	COL1A2,COL2A1,COL4A1,COL4A2,COL4A4,COL5A1,COL11A1,COL16A1	8/86	TRUE	TRUE
1_Member	Reactome Gene Sets	R-HSA-375165	NCAM signaling for neurite out-growth	-5.44274	-3.34513	1280,1282,1284,1286,1289,2674,6712	COL2A1,COL4A1,COL4A2,COL4A4,COL5A1,GFRA1,SPTBN2	7/63	TRUE	TRUE
1_Member	Reactome Gene Sets	R-HSA-419037	NCAM1 interactions	-5.38735	-3.29191	1280,1282,1284,1286,1289,2674	COL2A1,COL4A1,COL4A2,COL4A4,COL5A1,GFRA1	6/42	TRUE	TRUE
1_Member	KEGG Pathway	hsa05222	Small cell lung cancer	-5.29339	-3.20862	1282,1284,1286,2335,3685,3909,3911,3918	COL4A1,COL4A2,COL4A4,FN1,ITGAV,LAMA3,LAMA5,LAMC2	8/93	TRUE	TRUE
1_Member	GO Cellular Components	GO:0005587	collagen type IV trimer	-4.68907	-2.70707	1282,1284,1286	COL4A1,COL4A2,COL4A4	3/6	TRUE	TRUE
1_Member	KEGG Pathway	hsa04151	PI3K-Akt signaling pathway	-4.62056	-2.64517	1278,1280,1282,1284,1286,2149,2335,3685,3690,3909,3911,3918,4170,7059	COL1A2,COL2A1,COL4A1,COL4A2,COL4A4,F2R,FN1,ITGAV,ITGB3,LAMA3,LAMA5,LAMC2,MCL1,THBS3	14/362	TRUE	TRUE
1_Member	GO Cellular Components	GO:0098642	network-forming collagen trimer	-4.07569	-2.19293	1282,1284,1286	COL4A1,COL4A2,COL4A4	3/9	TRUE	TRUE
1_Member	GO Cellular Components	GO:0098645	collagen network	-4.07569	-2.19293	1282,1284,1286	COL4A1,COL4A2,COL4A4	3/9	TRUE	TRUE
1_Member	GO Cellular Components	GO:0043256	laminin complex	-3.92408	-2.08175	3909,3911,3918	LAMA3,LAMA5,LAMC2	3/10	FALSE	TRUE
1_Member	KEGG Pathway	hsa05200	Pathways in cancer	-3.88133	-2.04972	1282,1284,1286,2149,2335,2950,2953,3685,3909,3911,3918,4313,5332,5371,6772,653689	COL4A1,COL4A2,COL4A4,F2R,FN1,GSTP1,GSTT2,ITGAV,LAMA3,LAMA5,LAMC2,MMP2,PLCB4,PML,STAT1,GSTT2B	16/533	TRUE	TRUE
1_Member	GO Biological Processes	GO:0038063	collagen-activated tyrosine kinase receptor signaling pathway	-3.66741	-1.87623	780,1282,1284	DDR1,COL4A1,COL4A2	3/12	TRUE	TRUE
1_Member	Reactome Gene Sets	R-HSA-9913351	Formation of the dystrophin-glycoprotein complex (DGC)	-3.31795	-1.60184	3339,3909,3911,3918	HSPG2,LAMA3,LAMA5,LAMC2	4/36	TRUE	TRUE
1_Member	GO Biological Processes	GO:0038065	collagen-activated signaling pathway	-3.27477	-1.56839	780,1282,1284	DDR1,COL4A1,COL4A2	3/16	TRUE	TRUE
1_Member	Reactome Gene Sets	R-HSA-2173782	Binding and Uptake of Ligands by Scavenger Receptors	-3.05997	-1.40665	949,1278,1282,1284	SCARB1,COL1A2,COL4A1,COL4A2	4/42	TRUE	TRUE
1_Member	Reactome Gene Sets	R-HSA-3000480	Scavenging by Class A Receptors	-3.04646	-1.39833	1278,1282,1284	COL1A2,COL4A1,COL4A2	3/19	TRUE	TRUE
1_Member	KEGG Pathway	hsa04926	Relaxin signaling pathway	-2.65597	-1.1092	1278,1282,1284,1286,4313,5332	COL1A2,COL4A1,COL4A2,COL4A4,MMP2,PLCB4	6/130	TRUE	FALSE
1_Member	KEGG Pathway	hsa05145	Toxoplasmosis	-1.5553	-0.279209	3909,3911,3918,6772	LAMA3,LAMA5,LAMC2,STAT1	4/112	TRUE	FALSE
2_Summary	KEGG Pathway	hsa04820	Cytoskeleton in muscle cells	-15.4997	-11.8792	288,633,1278,1282,1284,1286,1289,1301,1462,1466,1674,2027,2275,2335,3339,3685,3690,4628,4811,6712,7059,22795,26287,1280,1400,1759,1947,2674,3897,4313,4637,6192,10381,347733	ANK3,BGN,COL1A2,COL4A1,COL4A2,COL4A4,COL5A1,COL11A1,VCAN,CSRP2,DES,ENO3,FHL3,FN1,HSPG2,ITGAV,ITGB3,MYH10,NID1,SPTBN2,THBS3,NID2,ANKRD2,COL2A1,CRMP1,DNM1,EFNB1,GFRA1,L1CAM,MMP2,MYL6,RPS4Y1,TUBB3,TUBB2B	34/-	TRUE	TRUE
2_Member	KEGG Pathway	hsa04820	Cytoskeleton in muscle cells	-15.4997	-11.8792	288,633,1278,1282,1284,1286,1289,1301,1462,1466,1674,2027,2275,2335,3339,3685,3690,4628,4811,6712,7059,22795,26287	ANK3,BGN,COL1A2,COL4A1,COL4A2,COL4A4,COL5A1,COL11A1,VCAN,CSRP2,DES,ENO3,FHL3,FN1,HSPG2,ITGAV,ITGB3,MYH10,NID1,SPTBN2,THBS3,NID2,ANKRD2	23/232	TRUE	TRUE
2_Member	Reactome Gene Sets	R-HSA-422475	Axon guidance	-6.14205	-3.88144	288,1280,1282,1284,1286,1289,1400,1759,1947,2674,3685,3690,3897,4313,4628,4637,6192,6712,10381,347733	ANK3,COL2A1,COL4A1,COL4A2,COL4A4,COL5A1,CRMP1,DNM1,EFNB1,GFRA1,ITGAV,ITGB3,L1CAM,MMP2,MYH10,MYL6,RPS4Y1,SPTBN2,TUBB3,TUBB2B	20/534	TRUE	TRUE
2_Member	Reactome Gene Sets	R-HSA-9675108	Nervous system development	-5.83682	-3.67873	288,1280,1282,1284,1286,1289,1400,1759,1947,2674,3685,3690,3897,4313,4628,4637,6192,6712,10381,347733	ANK3,COL2A1,COL4A1,COL4A2,COL4A4,COL5A1,CRMP1,DNM1,EFNB1,GFRA1,ITGAV,ITGB3,L1CAM,MMP2,MYH10,MYL6,RPS4Y1,SPTBN2,TUBB3,TUBB2B	20/559	TRUE	TRUE
3_Summary	GO Biological Processes	GO:0006790	sulfur compound metabolic process	-14.1685	-10.673	2131,2180,2678,2679,2950,2953,6622,6648,6799,6817,6818,10380,23305,23474,27010,55902,58472,80221,84869,390916,445329,653689,728441,445,6583,8659,10162,51449,55217,100,427,1363,1803,2028,4837,51005,349565	EXT1,ACSL1,GGT1,GGT3P,GSTP1,GSTT2,SNCA,SOD2,SULT1A2,SULT1A1,SULT1A3,BPNT1,ACSL6,ETHE1,TPK1,ACSS2,SQOR,ACSF2,CBR4,NUDT19,SULT1A4,GSTT2B,GGT2P,ASS1,SLC22A4,ALDH4A1,LPCAT3,PCYOX1,TMLHE,ADA,ASAH1,CPE,DPP4,ENPEP,NNMT,AMDHD2,NMNAT3	37/-	TRUE	TRUE
3_Member	GO Biological Processes	GO:0006790	sulfur compound metabolic process	-14.1685	-10.673	2131,2180,2678,2679,2950,2953,6622,6648,6799,6817,6818,10380,23305,23474,27010,55902,58472,80221,84869,390916,445329,653689,728441	EXT1,ACSL1,GGT1,GGT3P,GSTP1,GSTT2,SNCA,SOD2,SULT1A2,SULT1A1,SULT1A3,BPNT1,ACSL6,ETHE1,TPK1,ACSS2,SQOR,ACSF2,CBR4,NUDT19,SULT1A4,GSTT2B,GGT2P	23/267	TRUE	TRUE
3_Member	GO Biological Processes	GO:0006575	modified amino acid metabolic process	-12.186	-8.93345	445,2678,2679,2950,2953,6583,6622,6648,6817,6818,8659,10162,23474,51449,55217,445329,653689,728441	ASS1,GGT1,GGT3P,GSTP1,GSTT2,SLC22A4,SNCA,SOD2,SULT1A1,SULT1A3,ALDH4A1,LPCAT3,ETHE1,PCYOX1,TMLHE,SULT1A4,GSTT2B,GGT2P	18/183	TRUE	TRUE
3_Member	GO Biological Processes	GO:0043603	amide metabolic process	-10.6595	-7.62257	100,427,445,1363,1803,2028,2180,2678,2679,2950,2953,4837,6622,6648,23305,23474,51005,55902,80221,84869,349565,390916,653689,728441	ADA,ASAH1,ASS1,CPE,DPP4,ENPEP,ACSL1,GGT1,GGT3P,GSTP1,GSTT2,NNMT,SNCA,SOD2,ACSL6,ETHE1,AMDHD2,ACSS2,ACSF2,CBR4,NMNAT3,NUDT19,GSTT2B,GGT2P	24/431	TRUE	TRUE
3_Member	GO Biological Processes	GO:0006749	glutathione metabolic process	-8.07342	-5.44564	2678,2679,2950,2953,6622,6648,23474,653689,728441	GGT1,GGT3P,GSTP1,GSTT2,SNCA,SOD2,ETHE1,GSTT2B,GGT2P	9/59	TRUE	TRUE
4_Summary	KEGG Pathway	hsa04382	Cornified envelope formation	-12.941	-9.54241	1041,1282,1284,1286,2312,3853,3854,3855,3856,3875,3886,3909,3911,3918,5493,6275,9076,9119,11240,286887,427,2131,3606,5357,6692,9368,1674,83481,567,1264,1289,1466,4628,6622,10409,29114,83543,84695,84952,144347,1278,37,231,307,3383,50848	CDSN,COL4A1,COL4A2,COL4A4,FLG,KRT6A,KRT6B,KRT7,KRT8,KRT18,KRT35,LAMA3,LAMA5,LAMC2,PPL,S100A4,CLDN1,KRT75,PADI2,KRT6C,ASAH1,EXT1,IL18,PLS1,SPINT1,NHERF1,DES,EPPK1,B2M,CNN1,COL5A1,CSRP2,MYH10,SNCA,BASP1,TAGLN3,AIF1L,LOXL3,CGNL1,RFLNA,COL1A2,ACADVL,AKR1B1,ANXA4,ICAM1,F11R	46/-	TRUE	TRUE
4_Member	KEGG Pathway	hsa04382	Cornified envelope formation	-12.941	-9.54241	1041,1282,1284,1286,2312,3853,3854,3855,3856,3875,3886,3909,3911,3918,5493,6275,9076,9119,11240,286887	CDSN,COL4A1,COL4A2,COL4A4,FLG,KRT6A,KRT6B,KRT7,KRT8,KRT18,KRT35,LAMA3,LAMA5,LAMC2,PPL,S100A4,CLDN1,KRT75,PADI2,KRT6C	20/217	TRUE	TRUE
4_Member	GO Biological Processes	GO:0008544	epidermis development	-7.69297	-5.15766	427,1041,2131,2312,3606,3853,3854,3855,3909,3911,3918,5357,5493,6692,9076,9119,9368,286887	ASAH1,CDSN,EXT1,FLG,IL18,KRT6A,KRT6B,KRT7,LAMA3,LAMA5,LAMC2,PLS1,PPL,SPINT1,CLDN1,KRT75,NHERF1,KRT6C	18/345	TRUE	TRUE
4_Member	GO Biological Processes	GO:0045104	intermediate filament cytoskeleton organization	-7.31062	-4.8414	1674,3853,3854,3855,3875,3886,5493,9119,83481,286887	DES,KRT6A,KRT6B,KRT7,KRT18,KRT35,PPL,KRT75,EPPK1,KRT6C	10/95	TRUE	TRUE
4_Member	GO Biological Processes	GO:0045103	intermediate filament-based process	-7.26674	-4.80762	1674,3853,3854,3855,3875,3886,5493,9119,83481,286887	DES,KRT6A,KRT6B,KRT7,KRT18,KRT35,PPL,KRT75,EPPK1,KRT6C	10/96	TRUE	TRUE
4_Member	Reactome Gene Sets	R-HSA-6809371	Formation of the cornified envelope	-7.16853	-4.71928	1041,2312,3853,3854,3855,3856,3875,3886,5493,9119,286887	CDSN,FLG,KRT6A,KRT6B,KRT7,KRT8,KRT18,KRT35,PPL,KRT75,KRT6C	11/125	TRUE	TRUE
4_Member	GO Biological Processes	GO:0097435	supramolecular fiber organization	-7.05809	-4.62457	567,1041,1264,1289,1466,1674,3853,3854,3855,3886,4628,5357,6622,9119,10409,29114,83481,83543,84695,84952,144347,286887	B2M,CDSN,CNN1,COL5A1,CSRP2,DES,KRT6A,KRT6B,KRT7,KRT35,MYH10,PLS1,SNCA,KRT75,BASP1,TAGLN3,EPPK1,AIF1L,LOXL3,CGNL1,RFLNA,KRT6C	22/560	TRUE	TRUE
4_Member	GO Biological Processes	GO:0043588	skin development	-6.53549	-4.17428	427,1041,1278,1289,2131,2312,3606,3853,3854,3855,3911,5493,9076,9119,286887	ASAH1,CDSN,COL1A2,COL5A1,EXT1,FLG,IL18,KRT6A,KRT6B,KRT7,LAMA5,PPL,CLDN1,KRT75,KRT6C	15/286	TRUE	TRUE
4_Member	GO Biological Processes	GO:0045109	intermediate filament organization	-6.00537	-3.78858	1674,3853,3854,3855,3886,9119,83481,286887	DES,KRT6A,KRT6B,KRT7,KRT35,KRT75,EPPK1,KRT6C	8/75	TRUE	TRUE
4_Member	GO Cellular Components	GO:0045095	keratin filament	-5.57341	-3.44195	3853,3854,3855,3856,3875,3886,9119,83481,286887	KRT6A,KRT6B,KRT7,KRT8,KRT18,KRT35,KRT75,EPPK1,KRT6C	9/114	TRUE	TRUE
4_Member	GO Molecular Functions	GO:0030280	structural constituent of skin epidermis	-5.49011	-3.38046	2312,3853,3854,3855,3886,9119,286887	FLG,KRT6A,KRT6B,KRT7,KRT35,KRT75,KRT6C	7/62	TRUE	TRUE
4_Member	GO Biological Processes	GO:0030855	epithelial cell differentiation	-5.30404	-3.21716	37,231,307,427,1041,1282,2131,2312,3383,3853,3854,3855,3886,5357,5493,9076,9119,9368,10409,50848,286887	ACADVL,AKR1B1,ANXA4,ASAH1,CDSN,COL4A1,EXT1,FLG,ICAM1,KRT6A,KRT6B,KRT7,KRT35,PLS1,PPL,CLDN1,KRT75,NHERF1,BASP1,F11R,KRT6C	21/660	TRUE	TRUE
4_Member	GO Biological Processes	GO:0009913	epidermal cell differentiation	-4.94102	-2.90788	427,1041,2312,3853,3854,3855,5357,5493,9119,9368,286887	ASAH1,CDSN,FLG,KRT6A,KRT6B,KRT7,PLS1,PPL,KRT75,NHERF1,KRT6C	11/210	TRUE	TRUE
4_Member	Reactome Gene Sets	R-HSA-6805567	Keratinization	-4.90242	-2.873	1041,2312,3853,3854,3855,3856,3875,3886,5493,9119,286887	CDSN,FLG,KRT6A,KRT6B,KRT7,KRT8,KRT18,KRT35,PPL,KRT75,KRT6C	11/212	TRUE	TRUE
4_Member	GO Cellular Components	GO:0005882	intermediate filament	-4.80785	-2.80367	1674,3853,3854,3855,3856,3875,3886,5493,9119,83481,286887	DES,KRT6A,KRT6B,KRT7,KRT8,KRT18,KRT35,PPL,KRT75,EPPK1,KRT6C	11/217	TRUE	TRUE
4_Member	GO Biological Processes	GO:0030216	keratinocyte differentiation	-4.74591	-2.75382	427,1041,2312,3853,3854,3855,5493,9119,286887	ASAH1,CDSN,FLG,KRT6A,KRT6B,KRT7,PPL,KRT75,KRT6C	9/144	TRUE	TRUE
4_Member	GO Cellular Components	GO:0045111	intermediate filament cytoskeleton	-4.245	-2.32637	1674,3853,3854,3855,3856,3875,3886,5493,9119,83481,286887	DES,KRT6A,KRT6B,KRT7,KRT8,KRT18,KRT35,PPL,KRT75,EPPK1,KRT6C	11/250	TRUE	TRUE
4_Member	GO Biological Processes	GO:0031424	keratinization	-3.74025	-1.93045	3853,3854,3855,5493,9119,286887	KRT6A,KRT6B,KRT7,PPL,KRT75,KRT6C	6/81	TRUE	TRUE
4_Member	GO Cellular Components	GO:0001533	cornified envelope	-2.483	-0.981441	1041,2312,5493,9119	CDSN,FLG,PPL,KRT75	4/60	TRUE	FALSE
5_Summary	GO Biological Processes	GO:0055086	nucleobase-containing small molecule metabolic process	-12.3852	-9.07091	100,516,517,518,527,669,978,2027,2180,2762,4837,5740,6799,6817,6818,10165,10380,23305,23475,28992,51005,55191,55526,55902,80201,80221,83666,84869,349565,390916,445329,9600,10162,27010,55034,57605,54625,23411,3339,5498	ADA,ATP5MC1,ATP5MC2,ATP5MC3,ATP6V0C,BPGM,CDA,ENO3,ACSL1,GMDS,NNMT,PTGIS,SULT1A2,SULT1A1,SULT1A3,SLC25A13,BPNT1,ACSL6,QPRT,MACROD1,AMDHD2,NADSYN1,DHTKD1,ACSS2,HKDC1,ACSF2,PARP9,CBR4,NMNAT3,NUDT19,SULT1A4,PITPNM1,LPCAT3,TPK1,MOCOS,PITPNM2,PARP14,SIRT1,HSPG2,PPOX	40/-	TRUE	TRUE
5_Member	GO Biological Processes	GO:0055086	nucleobase-containing small molecule metabolic process	-12.3852	-9.07091	100,516,517,518,527,669,978,2027,2180,2762,4837,5740,6799,6817,6818,10165,10380,23305,23475,28992,51005,55191,55526,55902,80201,80221,83666,84869,349565,390916,445329	ADA,ATP5MC1,ATP5MC2,ATP5MC3,ATP6V0C,BPGM,CDA,ENO3,ACSL1,GMDS,NNMT,PTGIS,SULT1A2,SULT1A1,SULT1A3,SLC25A13,BPNT1,ACSL6,QPRT,MACROD1,AMDHD2,NADSYN1,DHTKD1,ACSS2,HKDC1,ACSF2,PARP9,CBR4,NMNAT3,NUDT19,SULT1A4	31/621	TRUE	TRUE
5_Member	GO Biological Processes	GO:0006753	nucleoside phosphate metabolic process	-12.1074	-8.88485	100,516,517,518,527,669,978,2027,2180,2762,4837,5740,6799,6817,6818,10165,10380,23305,23475,51005,55191,55526,55902,80201,80221,83666,84869,349565,390916,445329	ADA,ATP5MC1,ATP5MC2,ATP5MC3,ATP6V0C,BPGM,CDA,ENO3,ACSL1,GMDS,NNMT,PTGIS,SULT1A2,SULT1A1,SULT1A3,SLC25A13,BPNT1,ACSL6,QPRT,AMDHD2,NADSYN1,DHTKD1,ACSS2,HKDC1,ACSF2,PARP9,CBR4,NMNAT3,NUDT19,SULT1A4	30/595	TRUE	TRUE
5_Member	GO Biological Processes	GO:0072521	purine-containing compound metabolic process	-12.0684	-8.87388	100,516,517,518,527,669,2027,2180,4837,5740,6799,6817,6818,10165,10380,23305,23475,28992,55191,55526,55902,80201,80221,83666,84869,349565,390916,445329	ADA,ATP5MC1,ATP5MC2,ATP5MC3,ATP6V0C,BPGM,ENO3,ACSL1,NNMT,PTGIS,SULT1A2,SULT1A1,SULT1A3,SLC25A13,BPNT1,ACSL6,QPRT,MACROD1,NADSYN1,DHTKD1,ACSS2,HKDC1,ACSF2,PARP9,CBR4,NMNAT3,NUDT19,SULT1A4	28/517	TRUE	TRUE
5_Member	GO Biological Processes	GO:1901293	nucleoside phosphate biosynthetic process	-9.45475	-6.61242	100,516,517,518,527,978,2180,2762,4837,5740,10165,23305,23475,51005,55191,55902,83666,84869,349565	ADA,ATP5MC1,ATP5MC2,ATP5MC3,ATP6V0C,CDA,ACSL1,GMDS,NNMT,PTGIS,SLC25A13,ACSL6,QPRT,AMDHD2,NADSYN1,ACSS2,PARP9,CBR4,NMNAT3	19/301	TRUE	TRUE
5_Member	GO Biological Processes	GO:0006163	purine nucleotide metabolic process	-9.24976	-6.45318	100,516,517,518,527,669,2027,4837,5740,6799,6817,6818,10165,10380,23475,55191,55526,80201,83666,349565,445329	ADA,ATP5MC1,ATP5MC2,ATP5MC3,ATP6V0C,BPGM,ENO3,NNMT,PTGIS,SULT1A2,SULT1A1,SULT1A3,SLC25A13,BPNT1,QPRT,NADSYN1,DHTKD1,HKDC1,PARP9,NMNAT3,SULT1A4	21/384	TRUE	TRUE
5_Member	GO Biological Processes	GO:0090407	organophosphate biosynthetic process	-8.89174	-6.16521	100,516,517,518,527,978,2180,2762,4837,5740,9600,10162,10165,10380,23305,23475,27010,51005,55034,55191,55902,57605,83666,84869,349565	ADA,ATP5MC1,ATP5MC2,ATP5MC3,ATP6V0C,CDA,ACSL1,GMDS,NNMT,PTGIS,PITPNM1,LPCAT3,SLC25A13,BPNT1,ACSL6,QPRT,TPK1,AMDHD2,MOCOS,NADSYN1,ACSS2,PITPNM2,PARP9,CBR4,NMNAT3	25/571	TRUE	TRUE
5_Member	GO Biological Processes	GO:0009117	nucleotide metabolic process	-8.88161	-6.16422	100,516,517,518,527,669,978,2027,4837,5740,6799,6817,6818,10165,10380,23475,55191,55526,80201,83666,349565,445329	ADA,ATP5MC1,ATP5MC2,ATP5MC3,ATP6V0C,BPGM,CDA,ENO3,NNMT,PTGIS,SULT1A2,SULT1A1,SULT1A3,SLC25A13,BPNT1,QPRT,NADSYN1,DHTKD1,HKDC1,PARP9,NMNAT3,SULT1A4	22/443	TRUE	TRUE
5_Member	GO Biological Processes	GO:0072522	purine-containing compound biosynthetic process	-8.33839	-5.66403	100,516,517,518,527,2180,4837,5740,10165,23305,23475,55191,55902,83666,84869,349565	ADA,ATP5MC1,ATP5MC2,ATP5MC3,ATP6V0C,ACSL1,NNMT,PTGIS,SLC25A13,ACSL6,QPRT,NADSYN1,ACSS2,PARP9,CBR4,NMNAT3	16/242	TRUE	TRUE
5_Member	GO Biological Processes	GO:0043173	nucleotide salvage	-7.25212	-4.79797	100,978,4837,5740,55191,83666,349565	ADA,CDA,NNMT,PTGIS,NADSYN1,PARP9,NMNAT3	7/35	TRUE	TRUE
5_Member	GO Biological Processes	GO:0019362	pyridine nucleotide metabolic process	-7.02743	-4.60789	669,2027,4837,5740,10165,23475,55191,55526,80201,83666,349565	BPGM,ENO3,NNMT,PTGIS,SLC25A13,QPRT,NADSYN1,DHTKD1,HKDC1,PARP9,NMNAT3	11/129	TRUE	TRUE
5_Member	GO Biological Processes	GO:0046496	nicotinamide nucleotide metabolic process	-7.02743	-4.60789	669,2027,4837,5740,10165,23475,55191,55526,80201,83666,349565	BPGM,ENO3,NNMT,PTGIS,SLC25A13,QPRT,NADSYN1,DHTKD1,HKDC1,PARP9,NMNAT3	11/129	TRUE	TRUE
5_Member	GO Biological Processes	GO:0072524	pyridine-containing compound metabolic process	-6.75986	-4.38653	669,2027,4837,5740,10165,23475,55191,55526,80201,83666,349565	BPGM,ENO3,NNMT,PTGIS,SLC25A13,QPRT,NADSYN1,DHTKD1,HKDC1,PARP9,NMNAT3	11/137	TRUE	TRUE
5_Member	GO Biological Processes	GO:0009435	NAD+ biosynthetic process	-6.6855	-4.31625	4837,5740,23475,55191,83666,349565	NNMT,PTGIS,QPRT,NADSYN1,PARP9,NMNAT3	6/26	TRUE	TRUE
5_Member	GO Biological Processes	GO:0032261	purine nucleotide salvage	-6.47906	-4.12575	100,4837,5740,55191,83666,349565	ADA,NNMT,PTGIS,NADSYN1,PARP9,NMNAT3	6/28	TRUE	TRUE
5_Member	GO Biological Processes	GO:0019359	nicotinamide nucleotide biosynthetic process	-6.38211	-4.05536	4837,5740,23475,55191,83666,349565	NNMT,PTGIS,QPRT,NADSYN1,PARP9,NMNAT3	6/29	TRUE	TRUE
5_Member	GO Biological Processes	GO:0019363	pyridine nucleotide biosynthetic process	-6.38211	-4.05536	4837,5740,23475,55191,83666,349565	NNMT,PTGIS,QPRT,NADSYN1,PARP9,NMNAT3	6/29	TRUE	TRUE
5_Member	Reactome Gene Sets	R-HSA-196807	Nicotinate metabolism	-6.38211	-4.05536	4837,23475,54625,55191,83666,349565	NNMT,QPRT,PARP14,NADSYN1,PARP9,NMNAT3	6/29	TRUE	TRUE
5_Member	GO Biological Processes	GO:0009165	nucleotide biosynthetic process	-6.36809	-4.04501	100,516,517,518,527,978,4837,5740,10165,23475,55191,83666,349565	ADA,ATP5MC1,ATP5MC2,ATP5MC3,ATP6V0C,CDA,NNMT,PTGIS,SLC25A13,QPRT,NADSYN1,PARP9,NMNAT3	13/218	TRUE	TRUE
5_Member	GO Biological Processes	GO:0006164	purine nucleotide biosynthetic process	-6.36104	-4.04159	100,516,517,518,527,4837,5740,10165,23475,55191,83666,349565	ADA,ATP5MC1,ATP5MC2,ATP5MC3,ATP6V0C,NNMT,PTGIS,SLC25A13,QPRT,NADSYN1,PARP9,NMNAT3	12/183	TRUE	TRUE
5_Member	GO Biological Processes	GO:0019365	pyridine nucleotide salvage	-6.22614	-3.9381	4837,5740,55191,83666,349565	NNMT,PTGIS,NADSYN1,PARP9,NMNAT3	5/17	TRUE	TRUE
5_Member	GO Biological Processes	GO:0034355	NAD+ biosynthetic process via the salvage pathway	-6.22614	-3.9381	4837,5740,55191,83666,349565	NNMT,PTGIS,NADSYN1,PARP9,NMNAT3	5/17	TRUE	TRUE
5_Member	GO Biological Processes	GO:0019674	NAD+ metabolic process	-6.19878	-3.92399	4837,5740,10165,23475,55191,83666,349565	NNMT,PTGIS,SLC25A13,QPRT,NADSYN1,PARP9,NMNAT3	7/49	TRUE	TRUE
5_Member	GO Biological Processes	GO:0043101	purine-containing compound salvage	-6.02934	-3.80679	100,4837,5740,55191,83666,349565	ADA,NNMT,PTGIS,NADSYN1,PARP9,NMNAT3	6/33	TRUE	TRUE
5_Member	GO Biological Processes	GO:0072525	pyridine-containing compound biosynthetic process	-6.02934	-3.80679	4837,5740,23475,55191,83666,349565	NNMT,PTGIS,QPRT,NADSYN1,PARP9,NMNAT3	6/33	TRUE	TRUE
5_Member	GO Biological Processes	GO:0043094	metabolic compound salvage	-5.84811	-3.68049	100,978,4837,5740,55191,83666,349565	ADA,CDA,NNMT,PTGIS,NADSYN1,PARP9,NMNAT3	7/55	TRUE	TRUE
5_Member	KEGG Pathway	hsa00760	Nicotinate and nicotinamide metabolism	-4.39316	-2.45241	4837,23411,23475,55191,349565	NNMT,SIRT1,QPRT,NADSYN1,NMNAT3	5/38	TRUE	TRUE
5_Member	Reactome Gene Sets	R-HSA-196849	Metabolism of water-soluble vitamins and cofactors	-4.35285	-2.42108	4837,23475,27010,54625,55034,55191,83666,349565	NNMT,QPRT,TPK1,PARP14,MOCOS,NADSYN1,PARP9,NMNAT3	8/125	TRUE	TRUE
5_Member	Reactome Gene Sets	R-HSA-196854	Metabolism of vitamins and cofactors	-3.67777	-1.87902	3339,4837,23475,27010,54625,55034,55191,83666,349565	HSPG2,NNMT,QPRT,TPK1,PARP14,MOCOS,NADSYN1,PARP9,NMNAT3	9/198	TRUE	TRUE
5_Member	KEGG Pathway	hsa01240	Biosynthesis of cofactors	-1.67733	-0.376055	5498,23475,27010,55191,349565	PPOX,QPRT,TPK1,NADSYN1,NMNAT3	5/154	TRUE	FALSE
5_Member	GO Biological Processes	GO:0006767	water-soluble vitamin metabolic process	-1.47505	-0.21692	4837,27010,349565	NNMT,TPK1,NMNAT3	3/69	TRUE	FALSE
6_Summary	GO Cellular Components	GO:0031966	mitochondrial membrane	-12.3556	-9.07091	37,291,445,516,517,518,622,706,2180,2232,4170,5498,6583,6622,9131,10165,11194,23305,26355,26520,51522,54332,54902,55847,57380,58472,60492,80201,83787,84303,84709,118980,137682,157378,253512,23411	ACADVL,SLC25A4,ASS1,ATP5MC1,ATP5MC2,ATP5MC3,BDH1,TSPO,ACSL1,FDXR,MCL1,PPOX,SLC22A4,SNCA,AIFM1,SLC25A13,ABCB8,ACSL6,FAM162A,TIMM9,TMEM14C,GDAP1,TTC19,CISD1,MRS2,SQOR,CCDC90B,HKDC1,ARMC10,CHCHD6,MGARP,SFXN2,NDUFAF6,TMEM65,SLC25A30,SIRT1	36/-	TRUE	TRUE
6_Member	GO Cellular Components	GO:0031966	mitochondrial membrane	-12.3556	-9.07091	37,291,445,516,517,518,622,706,2180,2232,4170,5498,6583,6622,9131,10165,11194,23305,26355,26520,51522,54332,54902,55847,57380,58472,60492,80201,83787,84303,84709,118980,137682,157378,253512	ACADVL,SLC25A4,ASS1,ATP5MC1,ATP5MC2,ATP5MC3,BDH1,TSPO,ACSL1,FDXR,MCL1,PPOX,SLC22A4,SNCA,AIFM1,SLC25A13,ABCB8,ACSL6,FAM162A,TIMM9,TMEM14C,GDAP1,TTC19,CISD1,MRS2,SQOR,CCDC90B,HKDC1,ARMC10,CHCHD6,MGARP,SFXN2,NDUFAF6,TMEM65,SLC25A30	35/795	TRUE	TRUE
6_Member	GO Cellular Components	GO:0005743	mitochondrial inner membrane	-8.44618	-5.75511	37,291,516,517,518,622,2232,5498,6622,9131,10165,11194,26520,51522,54902,57380,58472,84303,84709,118980,137682,157378,253512	ACADVL,SLC25A4,ATP5MC1,ATP5MC2,ATP5MC3,BDH1,FDXR,PPOX,SNCA,AIFM1,SLC25A13,ABCB8,TIMM9,TMEM14C,TTC19,MRS2,SQOR,CHCHD6,MGARP,SFXN2,NDUFAF6,TMEM65,SLC25A30	23/511	TRUE	TRUE
6_Member	GO Cellular Components	GO:0019866	organelle inner membrane	-8.27105	-5.61278	37,291,516,517,518,622,2232,5498,6622,9131,10165,11194,23411,26520,51522,54902,57380,58472,84303,84709,118980,137682,157378,253512	ACADVL,SLC25A4,ATP5MC1,ATP5MC2,ATP5MC3,BDH1,FDXR,PPOX,SNCA,AIFM1,SLC25A13,ABCB8,SIRT1,TIMM9,TMEM14C,TTC19,MRS2,SQOR,CHCHD6,MGARP,SFXN2,NDUFAF6,TMEM65,SLC25A30	24/567	TRUE	TRUE
7_Summary	GO Biological Processes	GO:0019752	carboxylic acid metabolic process	-11.7987	-8.65535	35,37,231,427,445,669,1962,2027,2180,2678,2679,2744,2950,5740,6622,8659,10873,23305,23411,23475,29785,51005,51084,55191,55526,55902,57380,80017,80201,80221,84869,259307,390916,728441,100,2232,6309,10165,27010,51478,221,222,622,706,5244,9600,10162,25816,57605,10380,527,57176,6648,54332	ACADS,ACADVL,AKR1B1,ASAH1,ASS1,BPGM,EHHADH,ENO3,ACSL1,GGT1,GGT3P,GLS,GSTP1,PTGIS,SNCA,ALDH4A1,ME3,ACSL6,SIRT1,QPRT,CYP2S1,AMDHD2,CRYL1,NADSYN1,DHTKD1,ACSS2,MRS2,DGLUCY,HKDC1,ACSF2,CBR4,IL4I1,NUDT19,GGT2P,ADA,FDXR,SC5D,SLC25A13,TPK1,HSD17B7,ALDH3B1,ALDH3B2,BDH1,TSPO,ABCB4,PITPNM1,LPCAT3,TNFAIP8,PITPNM2,BPNT1,ATP6V0C,VARS2,SOD2,GDAP1	54/-	TRUE	TRUE
7_Member	GO Biological Processes	GO:0019752	carboxylic acid metabolic process	-11.7987	-8.65535	35,37,231,427,445,669,1962,2027,2180,2678,2679,2744,2950,5740,6622,8659,10873,23305,23411,23475,29785,51005,51084,55191,55526,55902,57380,80017,80201,80221,84869,259307,390916,728441	ACADS,ACADVL,AKR1B1,ASAH1,ASS1,BPGM,EHHADH,ENO3,ACSL1,GGT1,GGT3P,GLS,GSTP1,PTGIS,SNCA,ALDH4A1,ME3,ACSL6,SIRT1,QPRT,CYP2S1,AMDHD2,CRYL1,NADSYN1,DHTKD1,ACSS2,MRS2,DGLUCY,HKDC1,ACSF2,CBR4,IL4I1,NUDT19,GGT2P	34/786	TRUE	TRUE
7_Member	GO Biological Processes	GO:0032787	monocarboxylic acid metabolic process	-9.03942	-6.30355	35,37,231,427,669,1962,2027,2180,2678,2950,5740,6622,10873,23305,29785,51084,55526,55902,57380,80201,80221,84869,259307,390916	ACADS,ACADVL,AKR1B1,ASAH1,BPGM,EHHADH,ENO3,ACSL1,GGT1,GSTP1,PTGIS,SNCA,ME3,ACSL6,CYP2S1,CRYL1,DHTKD1,ACSS2,MRS2,HKDC1,ACSF2,CBR4,IL4I1,NUDT19	24/518	TRUE	TRUE
7_Member	GO Biological Processes	GO:0044283	small molecule biosynthetic process	-8.05047	-5.42999	100,231,427,445,1962,2027,2180,2232,2678,2679,2744,2950,5740,6309,10165,10873,23411,27010,51478,55902,84869,728441	ADA,AKR1B1,ASAH1,ASS1,EHHADH,ENO3,ACSL1,FDXR,GGT1,GGT3P,GLS,GSTP1,PTGIS,SC5D,SLC25A13,ME3,SIRT1,TPK1,HSD17B7,ACSS2,CBR4,GGT2P	22/492	TRUE	TRUE
7_Member	GO Biological Processes	GO:0006631	fatty acid metabolic process	-7.12358	-4.68399	35,37,231,427,1962,2180,2678,2950,5740,6622,23305,29785,51084,55902,80221,84869,390916	ACADS,ACADVL,AKR1B1,ASAH1,EHHADH,ACSL1,GGT1,GSTP1,PTGIS,SNCA,ACSL6,CYP2S1,CRYL1,ACSS2,ACSF2,CBR4,NUDT19	17/335	TRUE	TRUE
7_Member	Reactome Gene Sets	R-HSA-556833	Metabolism of lipids	-5.95854	-3.75426	35,37,221,222,231,427,622,706,1962,2180,2232,2678,5244,5740,6309,9600,10162,23305,25816,51478,57605,80221,84869,390916	ACADS,ACADVL,ALDH3B1,ALDH3B2,AKR1B1,ASAH1,BDH1,TSPO,EHHADH,ACSL1,FDXR,GGT1,ABCB4,PTGIS,SC5D,PITPNM1,LPCAT3,ACSL6,TNFAIP8,HSD17B7,PITPNM2,ACSF2,CBR4,NUDT19	24/757	TRUE	TRUE
7_Member	GO Biological Processes	GO:0008610	lipid biosynthetic process	-5.88066	-3.70475	231,427,706,1962,2180,2232,2678,2679,2950,5740,6309,9600,10162,10380,23305,23411,51478,55902,57605,84869,728441	AKR1B1,ASAH1,TSPO,EHHADH,ACSL1,FDXR,GGT1,GGT3P,GSTP1,PTGIS,SC5D,PITPNM1,LPCAT3,BPNT1,ACSL6,SIRT1,HSD17B7,ACSS2,PITPNM2,CBR4,GGT2P	21/606	TRUE	TRUE
7_Member	GO Biological Processes	GO:0044272	sulfur compound biosynthetic process	-5.80356	-3.65044	2180,2678,2679,2950,23305,27010,55902,84869,728441	ACSL1,GGT1,GGT3P,GSTP1,ACSL6,TPK1,ACSS2,CBR4,GGT2P	9/107	TRUE	TRUE
7_Member	GO Biological Processes	GO:1901570	fatty acid derivative biosynthetic process	-5.49011	-3.38046	1962,2180,2678,2679,23305,84869,728441	EHHADH,ACSL1,GGT1,GGT3P,ACSL6,CBR4,GGT2P	7/62	TRUE	TRUE
7_Member	GO Biological Processes	GO:1901568	fatty acid derivative metabolic process	-5.36432	-3.27104	1962,2180,2678,2679,23305,84869,390916,728441	EHHADH,ACSL1,GGT1,GGT3P,ACSL6,CBR4,NUDT19,GGT2P	8/91	TRUE	TRUE
7_Member	GO Biological Processes	GO:0046394	carboxylic acid biosynthetic process	-4.46818	-2.5167	445,1962,2180,2678,2679,2744,2950,5740,10873,55902,84869,728441	ASS1,EHHADH,ACSL1,GGT1,GGT3P,GLS,GSTP1,PTGIS,ME3,ACSS2,CBR4,GGT2P	12/280	TRUE	TRUE
7_Member	GO Biological Processes	GO:0016053	organic acid biosynthetic process	-4.42325	-2.48098	445,1962,2180,2678,2679,2744,2950,5740,10873,55902,84869,728441	ASS1,EHHADH,ACSL1,GGT1,GGT3P,GLS,GSTP1,PTGIS,ME3,ACSS2,CBR4,GGT2P	12/283	TRUE	TRUE
7_Member	GO Biological Processes	GO:0043604	amide biosynthetic process	-4.32137	-2.39549	427,445,2180,2678,2679,23305,55902,84869,728441	ASAH1,ASS1,ACSL1,GGT1,GGT3P,ACSL6,ACSS2,CBR4,GGT2P	9/163	TRUE	TRUE
7_Member	GO Molecular Functions	GO:0120515	fatty acid-CoA ligase activity	-3.94775	-2.09566	2180,23305,55902,80221	ACSL1,ACSL6,ACSS2,ACSF2	4/25	TRUE	TRUE
7_Member	GO Molecular Functions	GO:0015645	fatty acid ligase activity	-3.87868	-2.04942	2180,23305,55902,80221	ACSL1,ACSL6,ACSS2,ACSF2	4/26	TRUE	TRUE
7_Member	GO Molecular Functions	GO:0016405	CoA-ligase activity	-3.74907	-1.93702	2180,23305,55902,80221	ACSL1,ACSL6,ACSS2,ACSF2	4/28	TRUE	TRUE
7_Member	GO Molecular Functions	GO:0016878	acid-thiol ligase activity	-3.5729	-1.80368	2180,23305,55902,80221	ACSL1,ACSL6,ACSS2,ACSF2	4/31	TRUE	TRUE
7_Member	GO Molecular Functions	GO:0016874	ligase activity	-3.48055	-1.72734	445,527,2180,23305,55191,55902,57176,80221	ASS1,ATP6V0C,ACSL1,ACSL6,NADSYN1,ACSS2,VARS2,ACSF2	8/167	TRUE	TRUE
7_Member	GO Molecular Functions	GO:0004467	long-chain fatty acid-CoA ligase activity	-3.36167	-1.64064	2180,23305,80221	ACSL1,ACSL6,ACSF2	3/15	FALSE	TRUE
7_Member	GO Biological Processes	GO:0006637	acyl-CoA metabolic process	-3.31562	-1.60184	2180,23305,55902,80221,84869,390916	ACSL1,ACSL6,ACSS2,ACSF2,CBR4,NUDT19	6/97	TRUE	TRUE
7_Member	GO Biological Processes	GO:0035383	thioester metabolic process	-3.31562	-1.60184	2180,23305,55902,80221,84869,390916	ACSL1,ACSL6,ACSS2,ACSF2,CBR4,NUDT19	6/97	TRUE	TRUE
7_Member	KEGG Pathway	hsa00061	Fatty acid biosynthesis	-3.11782	-1.45558	2180,23305,84869	ACSL1,ACSL6,CBR4	3/18	FALSE	TRUE
7_Member	GO Molecular Functions	GO:0016877	ligase activity, forming carbon-sulfur bonds	-3.09997	-1.44327	2180,23305,55902,80221	ACSL1,ACSL6,ACSS2,ACSF2	4/41	TRUE	TRUE
7_Member	GO Biological Processes	GO:0001676	long-chain fatty acid metabolic process	-3.02743	-1.38391	1962,2180,2950,23305,29785,80221	EHHADH,ACSL1,GSTP1,ACSL6,CYP2S1,ACSF2	6/110	TRUE	TRUE
7_Member	GO Biological Processes	GO:0035384	thioester biosynthetic process	-2.9831	-1.35437	2180,23305,55902,84869	ACSL1,ACSL6,ACSS2,CBR4	4/44	TRUE	TRUE
7_Member	GO Biological Processes	GO:0071616	acyl-CoA biosynthetic process	-2.9831	-1.35437	2180,23305,55902,84869	ACSL1,ACSL6,ACSS2,CBR4	4/44	TRUE	TRUE
7_Member	GO Biological Processes	GO:0035337	fatty-acyl-CoA metabolic process	-2.94613	-1.33283	2180,23305,84869,390916	ACSL1,ACSL6,CBR4,NUDT19	4/45	TRUE	TRUE
7_Member	KEGG Pathway	hsa04146	Peroxisome	-2.79277	-1.21826	1962,2180,6648,23305,390916	EHHADH,ACSL1,SOD2,ACSL6,NUDT19	5/83	TRUE	FALSE
7_Member	GO Biological Processes	GO:0006633	fatty acid biosynthetic process	-2.60632	-1.07633	1962,2180,2950,5740,55902,84869	EHHADH,ACSL1,GSTP1,PTGIS,ACSS2,CBR4	6/133	TRUE	FALSE
7_Member	GO Biological Processes	GO:0072330	monocarboxylic acid biosynthetic process	-2.59072	-1.06657	1962,2180,2950,5740,10873,55902,84869	EHHADH,ACSL1,GSTP1,PTGIS,ME3,ACSS2,CBR4	7/180	TRUE	FALSE
7_Member	GO Biological Processes	GO:0046949	fatty-acyl-CoA biosynthetic process	-2.54683	-1.03129	2180,23305,84869	ACSL1,ACSL6,CBR4	3/28	FALSE	FALSE
7_Member	Reactome Gene Sets	R-HSA-75105	Fatty acyl-CoA biosynthesis	-2.20101	-0.768519	2180,23305,84869	ACSL1,ACSL6,CBR4	3/37	FALSE	FALSE
7_Member	KEGG Pathway	hsa03320	PPAR signaling pathway	-2.11781	-0.709073	1962,2180,10873,23305	EHHADH,ACSL1,ME3,ACSL6	4/76	TRUE	FALSE
7_Member	KEGG Pathway	hsa04216	Ferroptosis	-2.04769	-0.66231	2180,10162,23305	ACSL1,LPCAT3,ACSL6	3/42	FALSE	FALSE
7_Member	GO Cellular Components	GO:0005777	peroxisome	-1.7212	-0.409641	1962,2180,23305,54332,390916	EHHADH,ACSL1,ACSL6,GDAP1,NUDT19	5/150	TRUE	FALSE
7_Member	GO Cellular Components	GO:0042579	microbody	-1.7212	-0.409641	1962,2180,23305,54332,390916	EHHADH,ACSL1,ACSL6,GDAP1,NUDT19	5/150	TRUE	FALSE
7_Member	GO Cellular Components	GO:0005778	peroxisomal membrane	-1.52427	-0.255005	2180,23305,54332	ACSL1,ACSL6,GDAP1	3/66	FALSE	FALSE
7_Member	GO Cellular Components	GO:0031903	microbody membrane	-1.52427	-0.255005	2180,23305,54332	ACSL1,ACSL6,GDAP1	3/66	FALSE	FALSE
8_Summary	GO Molecular Functions	GO:0016491	oxidoreductase activity	-10.7082	-7.65197	35,37,221,222,231,622,1962,2232,2882,2950,5498,5740,6309,6622,6648,8659,9131,10873,10954,23474,29785,51084,51449,51478,55217,55526,58472,84695,84869,259307,2744,8508,51110,55471,55902,80017,80221,135154,349565	ACADS,ACADVL,ALDH3B1,ALDH3B2,AKR1B1,BDH1,EHHADH,FDXR,GPX7,GSTP1,PPOX,PTGIS,SC5D,SNCA,SOD2,ALDH4A1,AIFM1,ME3,PDIA5,ETHE1,CYP2S1,CRYL1,PCYOX1,HSD17B7,TMLHE,DHTKD1,SQOR,LOXL3,CBR4,IL4I1,GLS,NIPSNAP1,LACTB2,NDUFAF7,ACSS2,DGLUCY,ACSF2,SDHAF4,NMNAT3	39/-	TRUE	TRUE
8_Member	GO Molecular Functions	GO:0016491	oxidoreductase activity	-10.7082	-7.65197	35,37,221,222,231,622,1962,2232,2882,2950,5498,5740,6309,6622,6648,8659,9131,10873,10954,23474,29785,51084,51449,51478,55217,55526,58472,84695,84869,259307	ACADS,ACADVL,ALDH3B1,ALDH3B2,AKR1B1,BDH1,EHHADH,FDXR,GPX7,GSTP1,PPOX,PTGIS,SC5D,SNCA,SOD2,ALDH4A1,AIFM1,ME3,PDIA5,ETHE1,CYP2S1,CRYL1,PCYOX1,HSD17B7,TMLHE,DHTKD1,SQOR,LOXL3,CBR4,IL4I1	30/677	TRUE	TRUE
8_Member	GO Cellular Components	GO:0005759	mitochondrial matrix	-6.82308	-4.43305	35,37,622,2232,2744,6622,6648,8508,8659,10873,23474,51110,55217,55471,55526,55902,80017,80221,84869,135154,349565	ACADS,ACADVL,BDH1,FDXR,GLS,SNCA,SOD2,NIPSNAP1,ALDH4A1,ME3,ETHE1,LACTB2,TMLHE,NDUFAF7,DHTKD1,ACSS2,DGLUCY,ACSF2,CBR4,SDHAF4,NMNAT3	21/530	TRUE	TRUE
9_Summary	GO Biological Processes	GO:0006068	ethanol catabolic process	-10.4646	-7.46389	221,222,6799,6817,6818,55902,445329,21,100,445,706,2030,2180,2621,2950,3339,3690,4313,5243,5498,6622,6648,6772,29785,79897,949,2232,2678,2953,4837,5740,10380,55748,653689,231,27010,84869,6620,23475,55191,259307,2131,1104,126321,55034,37,10954,9709,9368	ALDH3B1,ALDH3B2,SULT1A2,SULT1A1,SULT1A3,ACSS2,SULT1A4,ABCA3,ADA,ASS1,TSPO,SLC29A1,ACSL1,GAS6,GSTP1,HSPG2,ITGB3,MMP2,ABCB1,PPOX,SNCA,SOD2,STAT1,CYP2S1,RPP21,SCARB1,FDXR,GGT1,GSTT2,NNMT,PTGIS,BPNT1,CNDP2,GSTT2B,AKR1B1,TPK1,CBR4,SNCB,QPRT,NADSYN1,IL4I1,EXT1,RCC1,MFSD12,MOCOS,ACADVL,PDIA5,HERPUD1,NHERF1	49/-	TRUE	TRUE
9_Member	GO Biological Processes	GO:0006068	ethanol catabolic process	-10.4646	-7.46389	221,222,6799,6817,6818,55902,445329	ALDH3B1,ALDH3B2,SULT1A2,SULT1A1,SULT1A3,ACSS2,SULT1A4	7/14	TRUE	TRUE
9_Member	GO Biological Processes	GO:0006067	ethanol metabolic process	-10.1954	-7.2881	221,222,6799,6817,6818,55902,445329	ALDH3B1,ALDH3B2,SULT1A2,SULT1A1,SULT1A3,ACSS2,SULT1A4	7/15	TRUE	TRUE
9_Member	GO Biological Processes	GO:0034310	primary alcohol catabolic process	-9.72264	-6.84252	221,222,6799,6817,6818,55902,445329	ALDH3B1,ALDH3B2,SULT1A2,SULT1A1,SULT1A3,ACSS2,SULT1A4	7/17	TRUE	TRUE
9_Member	GO Biological Processes	GO:0009410	response to xenobiotic stimulus	-9.19737	-6.4322	21,100,445,706,2030,2180,2621,2950,3339,3690,4313,5243,5498,6622,6648,6772,6799,6817,6818,29785,79897,445329	ABCA3,ADA,ASS1,TSPO,SLC29A1,ACSL1,GAS6,GSTP1,HSPG2,ITGB3,MMP2,ABCB1,PPOX,SNCA,SOD2,STAT1,SULT1A2,SULT1A1,SULT1A3,CYP2S1,RPP21,SULT1A4	22/426	TRUE	TRUE
9_Member	GO Biological Processes	GO:0046164	alcohol catabolic process	-8.40138	-5.71875	221,222,949,6799,6817,6818,55902,445329	ALDH3B1,ALDH3B2,SCARB1,SULT1A2,SULT1A1,SULT1A3,ACSS2,SULT1A4	8/38	TRUE	TRUE
9_Member	Reactome Gene Sets	R-HSA-211859	Biological oxidations	-8.11391	-5.4787	2232,2678,2950,2953,4837,5740,6799,6817,6818,10380,29785,55748,55902,445329,653689	FDXR,GGT1,GSTP1,GSTT2,NNMT,PTGIS,SULT1A2,SULT1A1,SULT1A3,BPNT1,CYP2S1,CNDP2,ACSS2,SULT1A4,GSTT2B	15/217	TRUE	TRUE
9_Member	Reactome Gene Sets	R-HSA-156580	Phase II - Conjugation of compounds	-7.96197	-5.36268	2678,2950,2953,4837,6799,6817,6818,10380,55748,445329,653689	GGT1,GSTP1,GSTT2,NNMT,SULT1A2,SULT1A1,SULT1A3,BPNT1,CNDP2,SULT1A4,GSTT2B	11/105	TRUE	TRUE
9_Member	GO Biological Processes	GO:0034308	primary alcohol metabolic process	-7.26674	-4.80762	221,222,231,6799,6817,6818,27010,55902,84869,445329	ALDH3B1,ALDH3B2,AKR1B1,SULT1A2,SULT1A1,SULT1A3,TPK1,ACSS2,CBR4,SULT1A4	10/96	TRUE	TRUE
9_Member	Reactome Gene Sets	R-HSA-9753281	Paracetamol ADME	-6.38211	-4.05536	2678,2950,6817,6818,55748,445329	GGT1,GSTP1,SULT1A1,SULT1A3,CNDP2,SULT1A4	6/29	TRUE	TRUE
9_Member	GO Biological Processes	GO:0006576	biogenic amine metabolic process	-6.32097	-4.00512	6620,6622,6799,6817,6818,23475,55191,259307,445329	SNCB,SNCA,SULT1A2,SULT1A1,SULT1A3,QPRT,NADSYN1,IL4I1,SULT1A4	9/93	TRUE	TRUE
9_Member	GO Biological Processes	GO:0033865	nucleoside bisphosphate metabolic process	-6.08845	-3.85118	6799,6817,6818,10380,445329	SULT1A2,SULT1A1,SULT1A3,BPNT1,SULT1A4	5/18	FALSE	TRUE
9_Member	GO Biological Processes	GO:0033875	ribonucleoside bisphosphate metabolic process	-6.08845	-3.85118	6799,6817,6818,10380,445329	SULT1A2,SULT1A1,SULT1A3,BPNT1,SULT1A4	5/18	FALSE	TRUE
9_Member	GO Biological Processes	GO:0034032	purine nucleoside bisphosphate metabolic process	-6.08845	-3.85118	6799,6817,6818,10380,445329	SULT1A2,SULT1A1,SULT1A3,BPNT1,SULT1A4	5/18	FALSE	TRUE
9_Member	GO Biological Processes	GO:0034035	purine ribonucleoside bisphosphate metabolic process	-6.08845	-3.85118	6799,6817,6818,10380,445329	SULT1A2,SULT1A1,SULT1A3,BPNT1,SULT1A4	5/18	FALSE	TRUE
9_Member	GO Biological Processes	GO:0050427	3'-phosphoadenosine 5'-phosphosulfate metabolic process	-6.08845	-3.85118	6799,6817,6818,10380,445329	SULT1A2,SULT1A1,SULT1A3,BPNT1,SULT1A4	5/18	FALSE	TRUE
9_Member	Reactome Gene Sets	R-HSA-156584	Cytosolic sulfonation of small molecules	-6.08845	-3.85118	6799,6817,6818,10380,445329	SULT1A2,SULT1A1,SULT1A3,BPNT1,SULT1A4	5/18	FALSE	TRUE
9_Member	GO Biological Processes	GO:0009308	amine metabolic process	-5.9789	-3.76496	6620,6622,6799,6817,6818,23475,55191,259307,445329	SNCB,SNCA,SULT1A2,SULT1A1,SULT1A3,QPRT,NADSYN1,IL4I1,SULT1A4	9/102	TRUE	TRUE
9_Member	GO Biological Processes	GO:0071466	cellular response to xenobiotic stimulus	-5.9509	-3.75366	100,2030,2180,2621,2950,3690,5243,6799,6817,6818,29785,445329	ADA,SLC29A1,ACSL1,GAS6,GSTP1,ITGB3,ABCB1,SULT1A2,SULT1A1,SULT1A3,CYP2S1,SULT1A4	12/200	TRUE	TRUE
9_Member	GO Molecular Functions	GO:0004062	aryl sulfotransferase activity	-5.89357	-3.71242	6799,6817,6818,445329	SULT1A2,SULT1A1,SULT1A3,SULT1A4	4/9	TRUE	TRUE
9_Member	GO Biological Processes	GO:0006805	xenobiotic metabolic process	-5.84613	-3.68049	100,2030,2180,2950,5243,6799,6817,6818,29785,445329	ADA,SLC29A1,ACSL1,GSTP1,ABCB1,SULT1A2,SULT1A1,SULT1A3,CYP2S1,SULT1A4	10/136	TRUE	TRUE
9_Member	GO Biological Processes	GO:0051923	sulfation	-5.83815	-3.67873	2131,6799,6817,6818,445329	EXT1,SULT1A2,SULT1A1,SULT1A3,SULT1A4	5/20	FALSE	TRUE
9_Member	Reactome Gene Sets	R-HSA-9748784	Drug ADME	-5.73606	-3.58785	100,2030,2678,2950,5243,6817,6818,55748,445329	ADA,SLC29A1,GGT1,GSTP1,ABCB1,SULT1A1,SULT1A3,CNDP2,SULT1A4	9/109	TRUE	TRUE
9_Member	GO Biological Processes	GO:0006584	catecholamine metabolic process	-5.15041	-3.09222	6620,6622,6799,6817,6818,445329	SNCB,SNCA,SULT1A2,SULT1A1,SULT1A3,SULT1A4	6/46	TRUE	TRUE
9_Member	GO Biological Processes	GO:0009712	catechol-containing compound metabolic process	-5.15041	-3.09222	6620,6622,6799,6817,6818,445329	SNCB,SNCA,SULT1A2,SULT1A1,SULT1A3,SULT1A4	6/46	TRUE	TRUE
9_Member	KEGG Pathway	hsa05204	Chemical carcinogenesis - DNA adducts	-5.09205	-3.04233	2950,2953,6799,6817,6818,445329,653689	GSTP1,GSTT2,SULT1A2,SULT1A1,SULT1A3,SULT1A4,GSTT2B	7/71	TRUE	TRUE
9_Member	GO Biological Processes	GO:0042417	dopamine metabolic process	-4.7681	-2.76566	6620,6622,6817,6818,445329	SNCB,SNCA,SULT1A1,SULT1A3,SULT1A4	5/32	TRUE	TRUE
9_Member	GO Molecular Functions	GO:0043199	sulfate binding	-4.68907	-2.70707	1104,6818,445329	RCC1,SULT1A3,SULT1A4	3/6	FALSE	TRUE
9_Member	GO Biological Processes	GO:0018958	phenol-containing compound metabolic process	-4.38304	-2.4438	6620,6622,6799,6817,6818,126321,445329	SNCB,SNCA,SULT1A2,SULT1A1,SULT1A3,MFSD12,SULT1A4	7/91	TRUE	TRUE
9_Member	GO Biological Processes	GO:0019614	catechol-containing compound catabolic process	-3.78906	-1.97363	6817,6818,445329	SULT1A1,SULT1A3,SULT1A4	3/11	FALSE	TRUE
9_Member	GO Biological Processes	GO:0042420	dopamine catabolic process	-3.78906	-1.97363	6817,6818,445329	SULT1A1,SULT1A3,SULT1A4	3/11	FALSE	TRUE
9_Member	GO Biological Processes	GO:0042424	catecholamine catabolic process	-3.78906	-1.97363	6817,6818,445329	SULT1A1,SULT1A3,SULT1A4	3/11	FALSE	TRUE
9_Member	GO Biological Processes	GO:0009812	flavonoid metabolic process	-3.4553	-1.71276	6817,6818,445329	SULT1A1,SULT1A3,SULT1A4	3/14	FALSE	TRUE
9_Member	GO Biological Processes	GO:0019336	phenol-containing compound catabolic process	-3.36167	-1.64064	6817,6818,445329	SULT1A1,SULT1A3,SULT1A4	3/15	FALSE	TRUE
9_Member	GO Molecular Functions	GO:0016782	transferase activity, transferring sulphur-containing groups	-3.09809	-1.44218	6799,6817,6818,55034,445329	SULT1A2,SULT1A1,SULT1A3,MOCOS,SULT1A4	5/71	FALSE	TRUE
9_Member	GO Biological Processes	GO:0009310	amine catabolic process	-2.97915	-1.35437	6817,6818,445329	SULT1A1,SULT1A3,SULT1A4	3/20	FALSE	TRUE
9_Member	GO Biological Processes	GO:0042402	biogenic amine catabolic process	-2.97915	-1.35437	6817,6818,445329	SULT1A1,SULT1A3,SULT1A4	3/20	FALSE	TRUE
9_Member	Reactome Gene Sets	R-HSA-381038	XBP1(S) activates chaperone genes	-2.84059	-1.25487	37,6818,10954,445329	ACADVL,SULT1A3,PDIA5,SULT1A4	4/48	TRUE	FALSE
9_Member	Reactome Gene Sets	R-HSA-381070	IRE1alpha activates chaperones	-2.7743	-1.20497	37,6818,10954,445329	ACADVL,SULT1A3,PDIA5,SULT1A4	4/50	TRUE	FALSE
9_Member	GO Biological Processes	GO:0042403	thyroid hormone metabolic process	-2.69067	-1.13713	6817,6818,445329	SULT1A1,SULT1A3,SULT1A4	3/25	FALSE	FALSE
9_Member	GO Molecular Functions	GO:0008146	sulfotransferase activity	-2.65038	-1.10605	6799,6817,6818,445329	SULT1A2,SULT1A1,SULT1A3,SULT1A4	4/54	FALSE	FALSE
9_Member	Reactome Gene Sets	R-HSA-381119	Unfolded Protein Response (UPR)	-2.57565	-1.05323	37,6818,9709,10954,445329	ACADVL,SULT1A3,HERPUD1,PDIA5,SULT1A4	5/93	TRUE	FALSE
9_Member	GO Biological Processes	GO:1903351	cellular response to dopamine	-1.86484	-0.522733	6818,9368,445329	SULT1A3,NHERF1,SULT1A4	3/49	FALSE	FALSE
9_Member	GO Biological Processes	GO:1903350	response to dopamine	-1.84119	-0.503257	6818,9368,445329	SULT1A3,NHERF1,SULT1A4	3/50	FALSE	FALSE
9_Member	GO Biological Processes	GO:0071870	cellular response to catecholamine stimulus	-1.7518	-0.43415	6818,9368,445329	SULT1A3,NHERF1,SULT1A4	3/54	FALSE	FALSE
9_Member	GO Biological Processes	GO:0071868	cellular response to monoamine stimulus	-1.70995	-0.401031	6818,9368,445329	SULT1A3,NHERF1,SULT1A4	3/56	FALSE	FALSE
9_Member	GO Biological Processes	GO:0071869	response to catecholamine	-1.70995	-0.401031	6818,9368,445329	SULT1A3,NHERF1,SULT1A4	3/56	FALSE	FALSE
9_Member	GO Biological Processes	GO:0071867	response to monoamine	-1.66982	-0.372589	6818,9368,445329	SULT1A3,NHERF1,SULT1A4	3/58	FALSE	FALSE
10_Summary	Reactome Gene Sets	R-HSA-909733	Interferon alpha/beta signaling	-9.48687	-6.6323	684,3105,3106,3107,3433,4599,4600,4940,5777,6772,9636,567,3383,5371,6622,10381,23225,347733,6890,6892,1520,3685,5698,5699,8673,2131,8722,11277,1278,2335,3606,3911,4170,4313,6648,6813,9235,527,80223,949,3690,7059,1462,3897,9076,23705,50848,139065,950,1759,1803,1280,3709,4345,5493,6712,11118,706,2191,3339,6192,54625,83666,100,622,1917,2028,2674,4162,4241,4628,5064,5243,5332,8906,23411,259307,1363,9…	BST2,HLA-A,HLA-B,HLA-C,IFIT2,MX1,MX2,OAS3,PTPN6,STAT1,ISG15,B2M,ICAM1,PML,SNCA,TUBB3,NUP210,TUBB2B,TAP1,TAPBP,CTSS,ITGAV,PSMB9,PSMB10,VAMP8,EXT1,CTSF,TREX1,COL1A2,FN1,IL18,LAMA5,MCL1,MMP2,SOD2,STXBP2,IL32,ATP6V0C,RAB11FIP1,SCARB1,ITGB3,THBS3,VCAN,L1CAM,CLDN1,CADM1,F11R,SLITRK4,SCARB2,DNM1,DPP4,COL2A1,ITPR2,CD200,PPL,SPTBN2,BTN3A2,TSPO,FAP,HSPG2,RPS4Y1,PARP14,PARP9,ADA,BDH1,EEF1A2,ENPEP,GFRA1,MCAM…	84/-	TRUE	TRUE
10_Member	Reactome Gene Sets	R-HSA-909733	Interferon alpha/beta signaling	-9.48687	-6.6323	684,3105,3106,3107,3433,4599,4600,4940,5777,6772,9636	BST2,HLA-A,HLA-B,HLA-C,IFIT2,MX1,MX2,OAS3,PTPN6,STAT1,ISG15	11/76	TRUE	TRUE
10_Member	Reactome Gene Sets	R-HSA-913531	Interferon Signaling	-9.21358	-6.43819	567,684,3105,3106,3107,3383,3433,4599,4600,4940,5371,5777,6622,6772,9636,10381,23225,347733	B2M,BST2,HLA-A,HLA-B,HLA-C,ICAM1,IFIT2,MX1,MX2,OAS3,PML,PTPN6,SNCA,STAT1,ISG15,TUBB3,NUP210,TUBB2B	18/276	TRUE	TRUE
10_Member	GO Molecular Functions	GO:0046977	TAP binding	-8.6591	-5.95066	3105,3106,3107,6890,6892	HLA-A,HLA-B,HLA-C,TAP1,TAPBP	5/7	TRUE	TRUE
10_Member	Reactome Gene Sets	R-HSA-1236975	Antigen processing-Cross presentation	-8.32941	-5.66317	567,1520,3105,3106,3107,3685,5698,5699,6890,6892,8673	B2M,CTSS,HLA-A,HLA-B,HLA-C,ITGAV,PSMB9,PSMB10,TAP1,TAPBP,VAMP8	11/97	TRUE	TRUE
10_Member	GO Biological Processes	GO:0019882	antigen processing and presentation	-8.00612	-5.39988	567,1520,2131,3105,3106,3107,3383,6890,6892,8722,11277	B2M,CTSS,EXT1,HLA-A,HLA-B,HLA-C,ICAM1,TAP1,TAPBP,CTSF,TREX1	11/104	TRUE	TRUE
10_Member	Reactome Gene Sets	R-HSA-1280215	Cytokine Signaling in Immune system	-7.44898	-4.93116	567,684,1278,2335,3105,3106,3107,3383,3433,3606,3911,4170,4313,4599,4600,4940,5371,5777,6622,6648,6772,6813,9235,9636,10381,23225,347733	B2M,BST2,COL1A2,FN1,HLA-A,HLA-B,HLA-C,ICAM1,IFIT2,IL18,LAMA5,MCL1,MMP2,MX1,MX2,OAS3,PML,PTPN6,SNCA,SOD2,STAT1,STXBP2,IL32,ISG15,TUBB3,NUP210,TUBB2B	27/776	TRUE	TRUE
10_Member	GO Cellular Components	GO:0045335	phagocytic vesicle	-7.36878	-4.86777	527,567,1520,3105,3106,3107,3685,6813,6890,6892,8673,80223	ATP6V0C,B2M,CTSS,HLA-A,HLA-B,HLA-C,ITGAV,STXBP2,TAP1,TAPBP,VAMP8,RAB11FIP1	12/148	TRUE	TRUE
10_Member	Reactome Gene Sets	R-HSA-1236977	Endosomal/Vacuolar pathway	-7.33124	-4.85688	567,1520,3105,3106,3107	B2M,CTSS,HLA-A,HLA-B,HLA-C	5/11	TRUE	TRUE
10_Member	GO Biological Processes	GO:0019885	antigen processing and presentation of endogenous peptide antigen via MHC class I	-7.15995	-4.71555	567,3105,3106,3107,6890,6892	B2M,HLA-A,HLA-B,HLA-C,TAP1,TAPBP	6/22	TRUE	TRUE
10_Member	KEGG Pathway	hsa04145	Phagosome	-7.02425	-4.60789	527,949,1520,3105,3106,3107,3685,3690,6890,7059,10381,347733	ATP6V0C,SCARB1,CTSS,HLA-A,HLA-B,HLA-C,ITGAV,ITGB3,TAP1,THBS3,TUBB3,TUBB2B	12/159	TRUE	TRUE
10_Member	GO Biological Processes	GO:0002483	antigen processing and presentation of endogenous peptide antigen	-6.91118	-4.50377	567,3105,3106,3107,6890,6892	B2M,HLA-A,HLA-B,HLA-C,TAP1,TAPBP	6/24	TRUE	TRUE
10_Member	GO Cellular Components	GO:0030670	phagocytic vesicle membrane	-6.79463	-4.41718	527,567,3105,3106,3107,6890,6892,8673,80223	ATP6V0C,B2M,HLA-A,HLA-B,HLA-C,TAP1,TAPBP,VAMP8,RAB11FIP1	9/82	TRUE	TRUE
10_Member	Reactome Gene Sets	R-HSA-1236974	ER-Phagosome pathway	-6.79463	-4.41718	567,3105,3106,3107,5698,5699,6890,6892,8673	B2M,HLA-A,HLA-B,HLA-C,PSMB9,PSMB10,TAP1,TAPBP,VAMP8	9/82	TRUE	TRUE
10_Member	Reactome Gene Sets	R-HSA-983170	Antigen Presentation: Folding, assembly and peptide loading of class I MHC	-6.38211	-4.05536	567,3105,3106,3107,6890,6892	B2M,HLA-A,HLA-B,HLA-C,TAP1,TAPBP	6/29	TRUE	TRUE
10_Member	GO Biological Processes	GO:0048002	antigen processing and presentation of peptide antigen	-6.28727	-3.97854	567,1520,3105,3106,3107,6890,6892,8722	B2M,CTSS,HLA-A,HLA-B,HLA-C,TAP1,TAPBP,CTSF	8/69	TRUE	TRUE
10_Member	Reactome Gene Sets	R-HSA-877300	Interferon gamma signaling	-6.20287	-3.92399	567,3105,3106,3107,3383,4940,5371,5777,6772	B2M,HLA-A,HLA-B,HLA-C,ICAM1,OAS3,PML,PTPN6,STAT1	9/96	TRUE	TRUE
10_Member	GO Biological Processes	GO:0019883	antigen processing and presentation of endogenous antigen	-6.19922	-3.92399	567,3105,3106,3107,6890,6892	B2M,HLA-A,HLA-B,HLA-C,TAP1,TAPBP	6/31	TRUE	TRUE
10_Member	GO Cellular Components	GO:0042824	MHC class I peptide loading complex	-6.14534	-3.88144	567,3105,6890,6892	B2M,HLA-A,TAP1,TAPBP	4/8	TRUE	TRUE
10_Member	KEGG Pathway	hsa04514	Cell adhesion molecules	-6.08203	-3.85071	1462,3105,3106,3107,3383,3685,3897,9076,23705,50848,139065	VCAN,HLA-A,HLA-B,HLA-C,ICAM1,ITGAV,L1CAM,CLDN1,CADM1,F11R,SLITRK4	11/160	TRUE	TRUE
10_Member	GO Cellular Components	GO:0030139	endocytic vesicle	-5.95699	-3.75426	527,567,949,950,1520,1759,1803,3105,3106,3107,3685,6813,6890,6892,8673,80223	ATP6V0C,B2M,SCARB1,SCARB2,CTSS,DNM1,DPP4,HLA-A,HLA-B,HLA-C,ITGAV,STXBP2,TAP1,TAPBP,VAMP8,RAB11FIP1	16/361	TRUE	TRUE
10_Member	Reactome Gene Sets	R-HSA-1280218	Adaptive Immune System	-5.93856	-3.74675	567,1278,1280,1520,1759,3105,3106,3107,3383,3685,3709,4345,5493,5698,5699,5777,6712,6890,6892,8673,8722,10381,11118,347733	B2M,COL1A2,COL2A1,CTSS,DNM1,HLA-A,HLA-B,HLA-C,ICAM1,ITGAV,ITPR2,CD200,PPL,PSMB9,PSMB10,PTPN6,SPTBN2,TAP1,TAPBP,VAMP8,CTSF,TUBB3,BTN3A2,TUBB2B	24/759	TRUE	TRUE
10_Member	GO Biological Processes	GO:0002397	MHC class I protein complex assembly	-5.89357	-3.71242	567,3105,6890,6892	B2M,HLA-A,TAP1,TAPBP	4/9	TRUE	TRUE
10_Member	GO Biological Processes	GO:0002502	peptide antigen assembly with MHC class I protein complex	-5.89357	-3.71242	567,3105,6890,6892	B2M,HLA-A,TAP1,TAPBP	4/9	TRUE	TRUE
10_Member	GO Cellular Components	GO:0042612	MHC class I protein complex	-5.89357	-3.71242	567,3105,3106,3107	B2M,HLA-A,HLA-B,HLA-C	4/9	TRUE	TRUE
10_Member	GO Biological Processes	GO:0002474	antigen processing and presentation of peptide antigen via MHC class I	-5.7222	-3.57884	567,3105,3106,3107,6890,6892	B2M,HLA-A,HLA-B,HLA-C,TAP1,TAPBP	6/37	TRUE	TRUE
10_Member	KEGG Pathway	hsa05168	Herpes simplex virus 1 infection	-5.53363	-3.41603	567,684,3105,3106,3107,3690,4940,5371,6772,6890,6892	B2M,BST2,HLA-A,HLA-B,HLA-C,ITGB3,OAS3,PML,STAT1,TAP1,TAPBP	11/182	TRUE	TRUE
10_Member	GO Molecular Functions	GO:0042605	peptide antigen binding	-5.2074	-3.13918	567,3105,3106,3107,6890,6892	B2M,HLA-A,HLA-B,HLA-C,TAP1,TAPBP	6/45	TRUE	TRUE
10_Member	GO Cellular Components	GO:0030666	endocytic vesicle membrane	-4.98008	-2.94317	527,567,949,950,3105,3106,3107,6890,6892,8673,80223	ATP6V0C,B2M,SCARB1,SCARB2,HLA-A,HLA-B,HLA-C,TAP1,TAPBP,VAMP8,RAB11FIP1	11/208	TRUE	TRUE
10_Member	GO Biological Processes	GO:0002428	antigen processing and presentation of peptide antigen via MHC class Ib	-4.75836	-2.7594	567,3105,3106,3107	B2M,HLA-A,HLA-B,HLA-C	4/16	TRUE	TRUE
10_Member	KEGG Pathway	hsa04612	Antigen processing and presentation	-4.71232	-2.72531	567,1520,3105,3106,3107,6890,6892	B2M,CTSS,HLA-A,HLA-B,HLA-C,TAP1,TAPBP	7/81	TRUE	TRUE
10_Member	Reactome Gene Sets	R-HSA-9705671	SARS-CoV-2 activates/modulates innate and adaptive immune responses	-4.35285	-2.42108	567,3105,3106,3107,5777,6772,9636,23225	B2M,HLA-A,HLA-B,HLA-C,PTPN6,STAT1,ISG15,NUP210	8/125	TRUE	TRUE
10_Member	GO Biological Processes	GO:0009595	detection of biotic stimulus	-4.33719	-2.40838	706,949,2191,3105,3106	TSPO,SCARB1,FAP,HLA-A,HLA-B	5/39	TRUE	TRUE
10_Member	KEGG Pathway	hsa05169	Epstein-Barr virus infection	-4.29892	-2.37451	567,3105,3106,3107,3383,4940,6772,6890,6892,9636	B2M,HLA-A,HLA-B,HLA-C,ICAM1,OAS3,STAT1,TAP1,TAPBP,ISG15	10/204	TRUE	TRUE
10_Member	Reactome Gene Sets	R-HSA-198933	Immunoregulatory interactions between a Lymphoid and a non-Lymphoid cell	-4.23171	-2.31738	567,1278,1280,3105,3106,3107,3383,4345	B2M,COL1A2,COL2A1,HLA-A,HLA-B,HLA-C,ICAM1,CD200	8/130	TRUE	TRUE
10_Member	Reactome Gene Sets	R-HSA-9694516	SARS-CoV-2 Infection	-4.13861	-2.23552	567,3105,3106,3107,3339,5777,6192,6772,9636,23225,54625,83666	B2M,HLA-A,HLA-B,HLA-C,HSPG2,PTPN6,RPS4Y1,STAT1,ISG15,NUP210,PARP14,PARP9	12/303	TRUE	TRUE
10_Member	GO Cellular Components	GO:0098552	side of membrane	-4.10569	-2.21084	100,567,622,684,1917,2028,2674,3105,3106,3107,3383,3685,3690,4162,4241,4628,5064,5243,6892,11118	ADA,B2M,BDH1,BST2,EEF1A2,ENPEP,GFRA1,HLA-A,HLA-B,HLA-C,ICAM1,ITGAV,ITGB3,MCAM,MELTF,MYH10,PALM,ABCB1,TAPBP,BTN3A2	20/737	TRUE	TRUE
10_Member	GO Biological Processes	GO:0002475	antigen processing and presentation via MHC class Ib	-4.09568	-2.2049	567,3105,3106,3107	B2M,HLA-A,HLA-B,HLA-C	4/23	TRUE	TRUE
10_Member	GO Biological Processes	GO:0002396	MHC protein complex assembly	-4.01999	-2.15027	567,3105,6890,6892	B2M,HLA-A,TAP1,TAPBP	4/24	TRUE	TRUE
10_Member	GO Biological Processes	GO:0002501	peptide antigen assembly with MHC protein complex	-4.01999	-2.15027	567,3105,6890,6892	B2M,HLA-A,TAP1,TAPBP	4/24	TRUE	TRUE
10_Member	GO Cellular Components	GO:0098576	lumenal side of membrane	-3.98576	-2.12495	622,3105,3106,3107,6892	BDH1,HLA-A,HLA-B,HLA-C,TAPBP	5/46	TRUE	TRUE
10_Member	GO Cellular Components	GO:0042611	MHC protein complex	-3.94775	-2.09566	567,3105,3106,3107	B2M,HLA-A,HLA-B,HLA-C	4/25	TRUE	TRUE
10_Member	KEGG Pathway	hsa05163	Human cytomegalovirus infection	-3.92954	-2.08175	567,3105,3106,3107,3685,3690,3709,5332,6890,6892	B2M,HLA-A,HLA-B,HLA-C,ITGAV,ITGB3,ITPR2,PLCB4,TAP1,TAPBP	10/226	TRUE	TRUE
10_Member	GO Cellular Components	GO:0009897	external side of plasma membrane	-3.64563	-1.86159	100,567,2028,2674,3105,3106,3107,3383,3685,3690,4162,5243,11118	ADA,B2M,ENPEP,GFRA1,HLA-A,HLA-B,HLA-C,ICAM1,ITGAV,ITGB3,MCAM,ABCB1,BTN3A2	13/394	TRUE	TRUE
10_Member	Reactome Gene Sets	R-HSA-9705683	SARS-CoV-2-host interactions	-3.59743	-1.82411	567,3105,3106,3107,5777,6192,6772,9636,23225	B2M,HLA-A,HLA-B,HLA-C,PTPN6,RPS4Y1,STAT1,ISG15,NUP210	9/203	TRUE	TRUE
10_Member	GO Biological Processes	GO:0002486	antigen processing and presentation of endogenous peptide antigen via MHC class I via ER pathway, TAP-independent	-3.4553	-1.71276	3105,3106,3107	HLA-A,HLA-B,HLA-C	3/14	TRUE	TRUE
10_Member	KEGG Pathway	hsa05170	Human immunodeficiency virus 1 infection	-3.44401	-1.70338	567,684,3105,3106,3107,3709,6890,6892,8906	B2M,BST2,HLA-A,HLA-B,HLA-C,ITPR2,TAP1,TAPBP,AP1G2	9/213	TRUE	TRUE
10_Member	Reactome Gene Sets	R-HSA-9679506	SARS-CoV Infections	-3.40054	-1.6703	567,684,3105,3106,3107,3339,5777,6192,6772,9636,23225,54625,83666	B2M,BST2,HLA-A,HLA-B,HLA-C,HSPG2,PTPN6,RPS4Y1,STAT1,ISG15,NUP210,PARP14,PARP9	13/418	TRUE	TRUE
10_Member	GO Cellular Components	GO:0098553	lumenal side of endoplasmic reticulum membrane	-3.36563	-1.64064	3105,3106,3107,6892	HLA-A,HLA-B,HLA-C,TAPBP	4/35	TRUE	TRUE
10_Member	GO Biological Processes	GO:0002476	antigen processing and presentation of endogenous peptide antigen via MHC class Ib	-3.36167	-1.64064	3105,3106,3107	HLA-A,HLA-B,HLA-C	3/15	TRUE	TRUE
10_Member	GO Biological Processes	GO:0002484	antigen processing and presentation of endogenous peptide antigen via MHC class I via ER pathway	-3.36167	-1.64064	3105,3106,3107	HLA-A,HLA-B,HLA-C	3/15	TRUE	TRUE
10_Member	GO Biological Processes	GO:0002821	positive regulation of adaptive immune response	-3.25787	-1.55899	100,567,3105,3106,3107,3606,23411	ADA,B2M,HLA-A,HLA-B,HLA-C,IL18,SIRT1	7/138	TRUE	TRUE
10_Member	GO Biological Processes	GO:0001916	positive regulation of T cell mediated cytotoxicity	-3.2269	-1.53669	567,3105,3106,3107	B2M,HLA-A,HLA-B,HLA-C	4/38	TRUE	TRUE
10_Member	GO Biological Processes	GO:0001910	regulation of leukocyte mediated cytotoxicity	-3.22227	-1.53291	567,3105,3106,3107,3383,23705	B2M,HLA-A,HLA-B,HLA-C,ICAM1,CADM1	6/101	TRUE	TRUE
10_Member	GO Molecular Functions	GO:0042277	peptide binding	-3.13678	-1.46731	567,949,3105,3106,3107,3339,6890,6892,10381	B2M,SCARB1,HLA-A,HLA-B,HLA-C,HSPG2,TAP1,TAPBP,TUBB3	9/235	TRUE	TRUE
10_Member	GO Biological Processes	GO:0001912	positive regulation of leukocyte mediated cytotoxicity	-3.12621	-1.45836	567,3105,3106,3107,23705	B2M,HLA-A,HLA-B,HLA-C,CADM1	5/70	TRUE	TRUE
10_Member	GO Biological Processes	GO:0002709	regulation of T cell mediated immunity	-3.06904	-1.41391	567,3105,3106,3107,3606,259307	B2M,HLA-A,HLA-B,HLA-C,IL18,IL4I1	6/108	TRUE	TRUE
10_Member	GO Biological Processes	GO:0031343	positive regulation of cell killing	-3.04319	-1.39814	567,3105,3106,3107,23705	B2M,HLA-A,HLA-B,HLA-C,CADM1	5/73	TRUE	TRUE
10_Member	GO Biological Processes	GO:0002711	positive regulation of T cell mediated immunity	-3.01639	-1.37363	567,3105,3106,3107,3606	B2M,HLA-A,HLA-B,HLA-C,IL18	5/74	TRUE	TRUE
10_Member	GO Biological Processes	GO:0031341	regulation of cell killing	-2.98672	-1.35437	567,3105,3106,3107,3383,23705	B2M,HLA-A,HLA-B,HLA-C,ICAM1,CADM1	6/112	TRUE	TRUE
10_Member	KEGG Pathway	hsa04940	Type I diabetes mellitus	-2.9831	-1.35437	1363,3105,3106,3107	CPE,HLA-A,HLA-B,HLA-C	4/44	TRUE	TRUE
10_Member	GO Cellular Components	GO:0030662	coated vesicle membrane	-2.87125	-1.27607	527,567,950,3105,3106,3107,8673,8906	ATP6V0C,B2M,SCARB2,HLA-A,HLA-B,HLA-C,VAMP8,AP1G2	8/207	TRUE	FALSE
10_Member	GO Cellular Components	GO:0030658	transport vesicle membrane	-2.84183	-1.25487	527,567,1363,3105,3106,3107,3709,6622,8906	ATP6V0C,B2M,CPE,HLA-A,HLA-B,HLA-C,ITPR2,SNCA,AP1G2	9/259	TRUE	FALSE
10_Member	GO Biological Processes	GO:0001914	regulation of T cell mediated cytotoxicity	-2.84059	-1.25487	567,3105,3106,3107	B2M,HLA-A,HLA-B,HLA-C	4/48	TRUE	FALSE
10_Member	GO Cellular Components	GO:0140534	endoplasmic reticulum protein-containing complex	-2.81383	-1.23077	567,3105,6890,6892,9709,11277	B2M,HLA-A,TAP1,TAPBP,HERPUD1,TREX1	6/121	TRUE	FALSE
10_Member	Reactome Gene Sets	R-HSA-983169	Class I MHC mediated antigen processing & presentation	-2.77758	-1.20502	567,1520,3105,3106,3107,3685,5698,5699,6890,6892,8673	B2M,CTSS,HLA-A,HLA-B,HLA-C,ITGAV,PSMB9,PSMB10,TAP1,TAPBP,VAMP8	11/373	TRUE	FALSE
10_Member	GO Biological Processes	GO:0098581	detection of external biotic stimulus	-2.64068	-1.09938	949,3105,3106	SCARB1,HLA-A,HLA-B	3/26	TRUE	FALSE
10_Member	GO Biological Processes	GO:0002824	positive regulation of adaptive immune response based on somatic recombination of immune receptors built from immunoglobulin superfamily domains	-2.62271	-1.0874	100,567,3105,3106,3107,3606	ADA,B2M,HLA-A,HLA-B,HLA-C,IL18	6/132	TRUE	FALSE
10_Member	GO Biological Processes	GO:0042269	regulation of natural killer cell mediated cytotoxicity	-2.62104	-1.0869	3105,3106,3107,23705	HLA-A,HLA-B,HLA-C,CADM1	4/55	TRUE	FALSE
10_Member	GO Molecular Functions	GO:0003823	antigen binding	-2.61785	-1.08443	567,3105,3106,3107,6890,6892,10417	B2M,HLA-A,HLA-B,HLA-C,TAP1,TAPBP,SPON2	7/178	TRUE	FALSE
10_Member	GO Biological Processes	GO:0002708	positive regulation of lymphocyte mediated immunity	-2.54224	-1.02727	567,3105,3106,3107,3606,23705	B2M,HLA-A,HLA-B,HLA-C,IL18,CADM1	6/137	TRUE	FALSE
10_Member	GO Biological Processes	GO:0002715	regulation of natural killer cell mediated immunity	-2.45699	-0.961442	3105,3106,3107,23705	HLA-A,HLA-B,HLA-C,CADM1	4/61	TRUE	FALSE
10_Member	GO Cellular Components	GO:0012507	ER to Golgi transport vesicle membrane	-2.38183	-0.901222	567,3105,3106,3107	B2M,HLA-A,HLA-B,HLA-C	4/64	TRUE	FALSE
10_Member	GO Cellular Components	GO:0055038	recycling endosome membrane	-2.28083	-0.823862	567,3105,3106,3107,8673	B2M,HLA-A,HLA-B,HLA-C,VAMP8	5/109	TRUE	FALSE
10_Member	KEGG Pathway	hsa04218	Cellular senescence	-2.2538	-0.803093	291,3105,3106,3107,3709,23411	SLC25A4,HLA-A,HLA-B,HLA-C,ITPR2,SIRT1	6/157	TRUE	FALSE
10_Member	KEGG Pathway	hsa05416	Viral myocarditis	-2.24315	-0.795364	3105,3106,3107,3383	HLA-A,HLA-B,HLA-C,ICAM1	4/70	TRUE	FALSE
10_Member	GO Biological Processes	GO:0002705	positive regulation of leukocyte mediated immunity	-2.22755	-0.78796	567,3105,3106,3107,3606,23705	B2M,HLA-A,HLA-B,HLA-C,IL18,CADM1	6/159	TRUE	FALSE
10_Member	GO Cellular Components	GO:0030135	coated vesicle	-2.20922	-0.773432	527,567,950,3105,3106,3107,5244,8673,8906	ATP6V0C,B2M,SCARB2,HLA-A,HLA-B,HLA-C,ABCB4,VAMP8,AP1G2	9/323	TRUE	FALSE
10_Member	GO Cellular Components	GO:0055037	recycling endosome	-2.1824	-0.754581	567,3105,3106,3107,4241,8673,80223	B2M,HLA-A,HLA-B,HLA-C,MELTF,VAMP8,RAB11FIP1	7/214	TRUE	FALSE
10_Member	GO Cellular Components	GO:0030133	transport vesicle	-2.15898	-0.737613	527,567,633,1363,3105,3106,3107,3709,6622,8906,84958	ATP6V0C,B2M,BGN,CPE,HLA-A,HLA-B,HLA-C,ITPR2,SNCA,AP1G2,SYTL1	11/451	TRUE	FALSE
10_Member	KEGG Pathway	hsa05330	Allograft rejection	-2.13702	-0.723809	3105,3106,3107	HLA-A,HLA-B,HLA-C	3/39	TRUE	FALSE
10_Member	KEGG Pathway	hsa05166	Human T-cell leukemia virus 1 infection	-2.07852	-0.68103	291,567,706,3105,3106,3107,3383	SLC25A4,B2M,TSPO,HLA-A,HLA-B,HLA-C,ICAM1	7/224	TRUE	FALSE
10_Member	Reactome Gene Sets	R-HSA-2172127	DAP12 interactions	-1.99207	-0.619625	567,3106,3107	B2M,HLA-B,HLA-C	3/44	TRUE	FALSE
10_Member	KEGG Pathway	hsa05332	Graft-versus-host disease	-1.96534	-0.598922	3105,3106,3107	HLA-A,HLA-B,HLA-C	3/45	TRUE	FALSE
10_Member	KEGG Pathway	hsa04650	Natural killer cell mediated cytotoxicity	-1.91334	-0.558069	3105,3106,3107,3383,5777	HLA-A,HLA-B,HLA-C,ICAM1,PTPN6	5/134	TRUE	FALSE
10_Member	KEGG Pathway	hsa05167	Kaposi sarcoma-associated herpesvirus infection	-1.8084	-0.478696	3105,3106,3107,3383,3709,6772	HLA-A,HLA-B,HLA-C,ICAM1,ITPR2,STAT1	6/196	TRUE	FALSE
10_Member	GO Cellular Components	GO:0030134	COPII-coated ER to Golgi transport vesicle	-1.78794	-0.463024	567,3105,3106,3107	B2M,HLA-A,HLA-B,HLA-C	4/95	TRUE	FALSE
10_Member	KEGG Pathway	hsa05320	Autoimmune thyroid disease	-1.7518	-0.43415	3105,3106,3107	HLA-A,HLA-B,HLA-C	3/54	TRUE	FALSE
10_Member	GO Cellular Components	GO:0031901	early endosome membrane	-1.68573	-0.383314	567,3105,3106,3107,5371,8673	B2M,HLA-A,HLA-B,HLA-C,PML,VAMP8	6/209	TRUE	FALSE
10_Member	KEGG Pathway	hsa04144	Endocytosis	-1.34651	-0.115781	1759,3105,3106,3107,5371,80223	DNM1,HLA-A,HLA-B,HLA-C,PML,RAB11FIP1	6/252	TRUE	FALSE
11_Summary	GO Biological Processes	GO:0044282	small molecule catabolic process	-9.05797	-6.31254	35,37,100,221,222,949,1962,2027,2744,6799,6817,6818,8659,23475,51005,51084,55902,259307,390916,445329,2180,2678,5740,23305,80221,84869,5498,9131,51449,58472,427,5332,285148,622,29785	ACADS,ACADVL,ADA,ALDH3B1,ALDH3B2,SCARB1,EHHADH,ENO3,GLS,SULT1A2,SULT1A1,SULT1A3,ALDH4A1,QPRT,AMDHD2,CRYL1,ACSS2,IL4I1,NUDT19,SULT1A4,ACSL1,GGT1,PTGIS,ACSL6,ACSF2,CBR4,PPOX,AIFM1,PCYOX1,SQOR,ASAH1,PLCB4,IAH1,BDH1,CYP2S1	35/-	TRUE	TRUE
11_Member	GO Biological Processes	GO:0044282	small molecule catabolic process	-9.05797	-6.31254	35,37,100,221,222,949,1962,2027,2744,6799,6817,6818,8659,23475,51005,51084,55902,259307,390916,445329	ACADS,ACADVL,ADA,ALDH3B1,ALDH3B2,SCARB1,EHHADH,ENO3,GLS,SULT1A2,SULT1A1,SULT1A3,ALDH4A1,QPRT,AMDHD2,CRYL1,ACSS2,IL4I1,NUDT19,SULT1A4	20/355	TRUE	TRUE
11_Member	Reactome Gene Sets	R-HSA-8978868	Fatty acid metabolism	-4.86902	-2.8524	35,37,1962,2180,2678,5740,23305,80221,84869,390916	ACADS,ACADVL,EHHADH,ACSL1,GGT1,PTGIS,ACSL6,ACSF2,CBR4,NUDT19	10/175	TRUE	TRUE
11_Member	KEGG Pathway	hsa01212	Fatty acid metabolism	-4.60303	-2.63576	35,37,1962,2180,23305,84869	ACADS,ACADVL,EHHADH,ACSL1,ACSL6,CBR4	6/57	TRUE	TRUE
11_Member	KEGG Pathway	hsa00071	Fatty acid degradation	-4.12844	-2.22674	35,37,1962,2180,23305	ACADS,ACADVL,EHHADH,ACSL1,ACSL6	5/43	TRUE	TRUE
11_Member	GO Biological Processes	GO:0016054	organic acid catabolic process	-3.82141	-1.99681	35,37,1962,2744,8659,23475,51005,51084,259307,390916	ACADS,ACADVL,EHHADH,GLS,ALDH4A1,QPRT,AMDHD2,CRYL1,IL4I1,NUDT19	10/233	TRUE	TRUE
11_Member	GO Biological Processes	GO:0046395	carboxylic acid catabolic process	-3.82141	-1.99681	35,37,1962,2744,8659,23475,51005,51084,259307,390916	ACADS,ACADVL,EHHADH,GLS,ALDH4A1,QPRT,AMDHD2,CRYL1,IL4I1,NUDT19	10/233	TRUE	TRUE
11_Member	GO Molecular Functions	GO:0050660	flavin adenine dinucleotide binding	-3.57036	-1.80216	35,37,5498,9131,51449,58472	ACADS,ACADVL,PPOX,AIFM1,PCYOX1,SQOR	6/87	TRUE	TRUE
11_Member	GO Biological Processes	GO:0016042	lipid catabolic process	-2.90874	-1.30598	35,37,221,222,427,949,1962,5332,285148,390916	ACADS,ACADVL,ALDH3B1,ALDH3B2,ASAH1,SCARB1,EHHADH,PLCB4,IAH1,NUDT19	10/305	TRUE	TRUE
11_Member	KEGG Pathway	hsa00650	Butanoate metabolism	-2.59279	-1.0671	35,622,1962	ACADS,BDH1,EHHADH	3/27	TRUE	FALSE
11_Member	GO Molecular Functions	GO:0016627	oxidoreductase activity, acting on the CH-CH group of donors	-2.45699	-0.961442	35,37,5498,29785	ACADS,ACADVL,PPOX,CYP2S1	4/61	TRUE	FALSE
11_Member	KEGG Pathway	hsa00640	Propanoate metabolism	-2.37971	-0.901203	35,1962,55902	ACADS,EHHADH,ACSS2	3/32	TRUE	FALSE
11_Member	Reactome Gene Sets	R-HSA-77289	Mitochondrial Fatty Acid Beta-Oxidation	-2.20101	-0.768519	35,37,80221	ACADS,ACADVL,ACSF2	3/37	TRUE	FALSE
11_Member	GO Biological Processes	GO:0072329	monocarboxylic acid catabolic process	-2.18364	-0.755354	35,37,1962,51084,390916	ACADS,ACADVL,EHHADH,CRYL1,NUDT19	5/115	TRUE	FALSE
11_Member	KEGG Pathway	hsa00280	Valine, leucine and isoleucine degradation	-1.88906	-0.540417	35,1962,259307	ACADS,EHHADH,IL4I1	3/48	TRUE	FALSE
11_Member	GO Biological Processes	GO:0009062	fatty acid catabolic process	-1.8503	-0.5104	35,37,1962,390916	ACADS,ACADVL,EHHADH,NUDT19	4/91	TRUE	FALSE
11_Member	GO Biological Processes	GO:0006635	fatty acid beta-oxidation	-1.65036	-0.356215	35,37,1962	ACADS,ACADVL,EHHADH	3/59	TRUE	FALSE
12_Summary	GO Biological Processes	GO:0009611	response to wounding	-8.56337	-5.86371	358,706,780,949,1289,2131,2149,2335,2621,3685,3690,3853,4162,4313,4628,5270,5493,5777,6648,9076,83481,349565,950,1803,3383,8673,50848,1104,83666,3918,23411,27286,152007	AQP1,TSPO,DDR1,SCARB1,COL5A1,EXT1,F2R,FN1,GAS6,ITGAV,ITGB3,KRT6A,MCAM,MMP2,MYH10,SERPINE2,PPL,PTPN6,SOD2,CLDN1,EPPK1,NMNAT3,SCARB2,DPP4,ICAM1,VAMP8,F11R,RCC1,PARP9,LAMC2,SIRT1,SRPX2,GLIPR2	33/-	TRUE	TRUE
12_Member	GO Biological Processes	GO:0009611	response to wounding	-8.56337	-5.86371	358,706,780,949,1289,2131,2149,2335,2621,3685,3690,3853,4162,4313,4628,5270,5493,5777,6648,9076,83481,349565	AQP1,TSPO,DDR1,SCARB1,COL5A1,EXT1,F2R,FN1,GAS6,ITGAV,ITGB3,KRT6A,MCAM,MMP2,MYH10,SERPINE2,PPL,PTPN6,SOD2,CLDN1,EPPK1,NMNAT3	22/461	TRUE	TRUE
12_Member	GO Biological Processes	GO:0042060	wound healing	-7.7706	-5.21081	358,780,949,1289,2131,2149,2335,2621,3685,3690,3853,4162,4628,5270,5493,5777,9076,83481	AQP1,DDR1,SCARB1,COL5A1,EXT1,F2R,FN1,GAS6,ITGAV,ITGB3,KRT6A,MCAM,MYH10,SERPINE2,PPL,PTPN6,CLDN1,EPPK1	18/341	TRUE	TRUE
12_Member	GO Biological Processes	GO:0044409	symbiont entry into host	-7.35243	-4.86275	949,950,1803,2621,3383,3685,3690,4628,8673,9076,50848	SCARB1,SCARB2,DPP4,GAS6,ICAM1,ITGAV,ITGB3,MYH10,VAMP8,CLDN1,F11R	11/120	TRUE	TRUE
12_Member	GO Biological Processes	GO:0046718	symbiont entry into host cell	-7.35243	-4.86275	949,950,1803,2621,3383,3685,3690,4628,8673,9076,50848	SCARB1,SCARB2,DPP4,GAS6,ICAM1,ITGAV,ITGB3,MYH10,VAMP8,CLDN1,F11R	11/120	TRUE	TRUE
12_Member	GO Molecular Functions	GO:0001618	virus receptor activity	-6.88854	-4.48991	949,950,1803,3383,3685,3690,4628,9076,50848	SCARB1,SCARB2,DPP4,ICAM1,ITGAV,ITGB3,MYH10,CLDN1,F11R	9/80	TRUE	TRUE
12_Member	GO Molecular Functions	GO:0140272	exogenous protein binding	-6.84125	-4.44694	949,950,1803,3383,3685,3690,4628,9076,50848	SCARB1,SCARB2,DPP4,ICAM1,ITGAV,ITGB3,MYH10,CLDN1,F11R	9/81	TRUE	TRUE
12_Member	GO Biological Processes	GO:0051701	biological process involved in interaction with host	-6.08203	-3.85071	949,950,1803,2621,3383,3685,3690,4628,8673,9076,50848	SCARB1,SCARB2,DPP4,GAS6,ICAM1,ITGAV,ITGB3,MYH10,VAMP8,CLDN1,F11R	11/160	TRUE	TRUE
12_Member	GO Biological Processes	GO:0044403	biological process involved in symbiotic interaction	-5.9509	-3.75366	949,950,1803,2335,2621,3383,3685,3690,4628,8673,9076,50848	SCARB1,SCARB2,DPP4,FN1,GAS6,ICAM1,ITGAV,ITGB3,MYH10,VAMP8,CLDN1,F11R	12/200	TRUE	TRUE
12_Member	GO Biological Processes	GO:0019058	viral life cycle	-5.28842	-3.20576	949,950,1803,2621,3383,3685,3690,4628,8673,9076,50848	SCARB1,SCARB2,DPP4,GAS6,ICAM1,ITGAV,ITGB3,MYH10,VAMP8,CLDN1,F11R	11/193	TRUE	TRUE
12_Member	GO Biological Processes	GO:0016032	viral process	-5.24749	-3.17519	949,950,1104,1803,2621,3383,3685,3690,4628,8673,9076,50848,83666	SCARB1,SCARB2,RCC1,DPP4,GAS6,ICAM1,ITGAV,ITGB3,MYH10,VAMP8,CLDN1,F11R,PARP9	13/275	TRUE	TRUE
12_Member	GO Biological Processes	GO:0030335	positive regulation of cell migration	-3.26501	-1.56273	358,949,2149,2335,2621,3383,3685,3690,3918,4162,4313,6648,9076,23411,27286,152007	AQP1,SCARB1,F2R,FN1,GAS6,ICAM1,ITGAV,ITGB3,LAMC2,MCAM,MMP2,SOD2,CLDN1,SIRT1,SRPX2,GLIPR2	16/606	TRUE	TRUE
12_Member	GO Biological Processes	GO:2000147	positive regulation of cell motility	-3.05743	-1.40543	358,949,2149,2335,2621,3383,3685,3690,3918,4162,4313,6648,9076,23411,27286,152007	AQP1,SCARB1,F2R,FN1,GAS6,ICAM1,ITGAV,ITGB3,LAMC2,MCAM,MMP2,SOD2,CLDN1,SIRT1,SRPX2,GLIPR2	16/634	TRUE	TRUE
12_Member	GO Biological Processes	GO:0040017	positive regulation of locomotion	-2.93821	-1.32703	358,949,2149,2335,2621,3383,3685,3690,3918,4162,4313,6648,9076,23411,27286,152007	AQP1,SCARB1,F2R,FN1,GAS6,ICAM1,ITGAV,ITGB3,LAMC2,MCAM,MMP2,SOD2,CLDN1,SIRT1,SRPX2,GLIPR2	16/651	TRUE	TRUE
13_Summary	GO Molecular Functions	GO:0005178	integrin binding	-8.21485	-5.5644	1289,1307,2191,2335,2674,3339,3383,3685,3690,3911,9636,11096,50848,288,421,1363,3875,4162,4345,5493,5777,6712,6772,26136,27237	COL5A1,COL16A1,FAP,FN1,GFRA1,HSPG2,ICAM1,ITGAV,ITGB3,LAMA5,ISG15,ADAMTS5,F11R,ANK3,ARVCF,CPE,KRT18,MCAM,CD200,PPL,PTPN6,SPTBN2,STAT1,TES,ARHGEF16	25/-	TRUE	TRUE
13_Member	GO Molecular Functions	GO:0005178	integrin binding	-8.21485	-5.5644	1289,1307,2191,2335,2674,3339,3383,3685,3690,3911,9636,11096,50848	COL5A1,COL16A1,FAP,FN1,GFRA1,HSPG2,ICAM1,ITGAV,ITGB3,LAMA5,ISG15,ADAMTS5,F11R	13/152	TRUE	TRUE
13_Member	GO Molecular Functions	GO:0050839	cell adhesion molecule binding	-7.95489	-5.36244	288,421,1289,1307,1363,2191,2335,2674,3339,3383,3685,3690,3875,3911,4162,4345,5493,5777,6712,6772,9636,11096,26136,27237,50848	ANK3,ARVCF,COL5A1,COL16A1,CPE,FAP,FN1,GFRA1,HSPG2,ICAM1,ITGAV,ITGB3,KRT18,LAMA5,MCAM,CD200,PPL,PTPN6,SPTBN2,STAT1,ISG15,ADAMTS5,TES,ARHGEF16,F11R	25/636	TRUE	TRUE
14_Summary	GO Cellular Components	GO:0000323	lytic vacuole	-7.84281	-5.27025	21,100,288,427,527,567,633,684,949,950,1462,1520,1803,1917,2028,3339,6622,6813,8673,8722,10577,11182,11240,23457,51449,64129,126321,259307,2149,2674	ABCA3,ADA,ANK3,ASAH1,ATP6V0C,B2M,BGN,BST2,SCARB1,SCARB2,VCAN,CTSS,DPP4,EEF1A2,ENPEP,HSPG2,SNCA,STXBP2,VAMP8,CTSF,NPC2,SLC2A6,PADI2,ABCB9,PCYOX1,TINAGL1,MFSD12,IL4I1,F2R,GFRA1	30/-	TRUE	TRUE
14_Member	GO Cellular Components	GO:0000323	lytic vacuole	-7.84281	-5.27025	21,100,288,427,527,567,633,684,949,950,1462,1520,1803,1917,2028,3339,6622,6813,8673,8722,10577,11182,11240,23457,51449,64129,126321,259307	ABCA3,ADA,ANK3,ASAH1,ATP6V0C,B2M,BGN,BST2,SCARB1,SCARB2,VCAN,CTSS,DPP4,EEF1A2,ENPEP,HSPG2,SNCA,STXBP2,VAMP8,CTSF,NPC2,SLC2A6,PADI2,ABCB9,PCYOX1,TINAGL1,MFSD12,IL4I1	28/793	TRUE	TRUE
14_Member	GO Cellular Components	GO:0005764	lysosome	-7.84281	-5.27025	21,100,288,427,527,567,633,684,949,950,1462,1520,1803,1917,2028,3339,6622,6813,8673,8722,10577,11182,11240,23457,51449,64129,126321,259307	ABCA3,ADA,ANK3,ASAH1,ATP6V0C,B2M,BGN,BST2,SCARB1,SCARB2,VCAN,CTSS,DPP4,EEF1A2,ENPEP,HSPG2,SNCA,STXBP2,VAMP8,CTSF,NPC2,SLC2A6,PADI2,ABCB9,PCYOX1,TINAGL1,MFSD12,IL4I1	28/793	TRUE	TRUE
14_Member	GO Cellular Components	GO:0005765	lysosomal membrane	-2.99929	-1.35957	21,527,567,684,949,950,1803,1917,2028,8673,11182,23457,126321	ABCA3,ATP6V0C,B2M,BST2,SCARB1,SCARB2,DPP4,EEF1A2,ENPEP,VAMP8,SLC2A6,ABCB9,MFSD12	13/462	TRUE	TRUE
14_Member	GO Cellular Components	GO:0098852	lytic vacuole membrane	-2.99929	-1.35957	21,527,567,684,949,950,1803,1917,2028,8673,11182,23457,126321	ABCA3,ATP6V0C,B2M,BST2,SCARB1,SCARB2,DPP4,EEF1A2,ENPEP,VAMP8,SLC2A6,ABCB9,MFSD12	13/462	TRUE	TRUE
14_Member	GO Cellular Components	GO:0005774	vacuolar membrane	-2.65046	-1.10605	21,527,567,684,949,950,1803,1917,2028,8673,11182,23457,126321	ABCA3,ATP6V0C,B2M,BST2,SCARB1,SCARB2,DPP4,EEF1A2,ENPEP,VAMP8,SLC2A6,ABCB9,MFSD12	13/506	TRUE	FALSE
14_Member	GO Cellular Components	GO:0005770	late endosome	-2.18397	-0.755354	21,567,684,950,1520,2149,2674,8673,126321	ABCA3,B2M,BST2,SCARB2,CTSS,F2R,GFRA1,VAMP8,MFSD12	9/326	TRUE	FALSE
14_Member	GO Cellular Components	GO:0005771	multivesicular body	-1.49116	-0.228298	21,684,2674	ABCA3,BST2,GFRA1	3/68	TRUE	FALSE
15_Summary	GO Molecular Functions	GO:0005200	structural constituent of cytoskeleton	-7.54539	-5.02181	288,1674,3853,3854,5357,5493,6712,10381,347733,440915,653781,1759,3685,3690,3897,1520,8722,2762,51005,55808,1104	ANK3,DES,KRT6A,KRT6B,PLS1,PPL,SPTBN2,TUBB3,TUBB2B,POTEKP,POTEJ,DNM1,ITGAV,ITGB3,L1CAM,CTSS,CTSF,GMDS,AMDHD2,ST6GALNAC1,RCC1	21/-	TRUE	TRUE
15_Member	GO Molecular Functions	GO:0005200	structural constituent of cytoskeleton	-7.54539	-5.02181	288,1674,3853,3854,5357,5493,6712,10381,347733,440915,653781	ANK3,DES,KRT6A,KRT6B,PLS1,PPL,SPTBN2,TUBB3,TUBB2B,POTEKP,POTEJ	11/115	TRUE	TRUE
15_Member	Reactome Gene Sets	R-HSA-373760	L1CAM interactions	-4.47987	-2.52684	288,1759,3685,3690,3897,6712,10381,347733	ANK3,DNM1,ITGAV,ITGB3,L1CAM,SPTBN2,TUBB3,TUBB2B	8/120	TRUE	TRUE
15_Member	Reactome Gene Sets	R-HSA-437239	Recycling pathway of L1	-2.80706	-1.22665	1759,3897,10381,347733	DNM1,L1CAM,TUBB3,TUBB2B	4/49	TRUE	FALSE
15_Member	Reactome Gene Sets	R-HSA-2132295	MHC class II antigen presentation	-2.72442	-1.16589	1520,1759,6712,8722,10381,347733	CTSS,DNM1,SPTBN2,CTSF,TUBB3,TUBB2B	6/126	TRUE	FALSE
15_Member	Reactome Gene Sets	R-HSA-445095	Interaction between L1 and Ankyrins	-2.41921	-0.93227	288,3897,6712	ANK3,L1CAM,SPTBN2	3/31	TRUE	FALSE
15_Member	Reactome Gene Sets	R-HSA-190828	Gap junction trafficking	-1.86484	-0.522733	1759,10381,347733	DNM1,TUBB3,TUBB2B	3/49	TRUE	FALSE
15_Member	Reactome Gene Sets	R-HSA-157858	Gap junction trafficking and regulation	-1.81808	-0.486148	1759,10381,347733	DNM1,TUBB3,TUBB2B	3/51	TRUE	FALSE
15_Member	Reactome Gene Sets	R-HSA-6807878	COPI-mediated anterograde transport	-1.68627	-0.383501	288,6712,10381,347733	ANK3,SPTBN2,TUBB3,TUBB2B	4/102	TRUE	FALSE
15_Member	Reactome Gene Sets	R-HSA-446203	Asparagine N-linked glycosylation	-1.38121	-0.14274	288,2762,6712,10381,51005,55808,347733	ANK3,GMDS,SPTBN2,TUBB3,AMDHD2,ST6GALNAC1,TUBB2B	7/312	TRUE	FALSE
15_Member	Reactome Gene Sets	R-HSA-2995410	Nuclear Envelope (NE) Reassembly	-1.35555	-0.124238	1104,10381,347733	RCC1,TUBB3,TUBB2B	3/77	TRUE	FALSE
16_Summary	GO Biological Processes	GO:0006066	alcohol metabolic process	-7.43062	-4.92408	221,222,231,427,949,2232,6309,6799,6817,6818,10577,23780,27010,51478,55902,84869,445329,622,706	ALDH3B1,ALDH3B2,AKR1B1,ASAH1,SCARB1,FDXR,SC5D,SULT1A2,SULT1A1,SULT1A3,NPC2,APOL2,TPK1,HSD17B7,ACSS2,CBR4,SULT1A4,BDH1,TSPO	19/-	TRUE	TRUE
16_Member	GO Biological Processes	GO:0006066	alcohol metabolic process	-7.43062	-4.92408	221,222,231,427,949,2232,6309,6799,6817,6818,10577,23780,27010,51478,55902,84869,445329	ALDH3B1,ALDH3B2,AKR1B1,ASAH1,SCARB1,FDXR,SC5D,SULT1A2,SULT1A1,SULT1A3,NPC2,APOL2,TPK1,HSD17B7,ACSS2,CBR4,SULT1A4	17/319	TRUE	TRUE
16_Member	GO Biological Processes	GO:0008202	steroid metabolic process	-5.5309	-3.41556	231,622,706,949,2232,6309,6799,6817,6818,10577,23780,51478,445329	AKR1B1,BDH1,TSPO,SCARB1,FDXR,SC5D,SULT1A2,SULT1A1,SULT1A3,NPC2,APOL2,HSD17B7,SULT1A4	13/259	TRUE	TRUE
16_Member	Reactome Gene Sets	R-HSA-196108	Pregnenolone biosynthesis	-3.66741	-1.87623	231,706,2232	AKR1B1,TSPO,FDXR	3/12	TRUE	TRUE
16_Member	GO Biological Processes	GO:0008203	cholesterol metabolic process	-2.83226	-1.24787	949,2232,6309,10577,23780,51478	SCARB1,FDXR,SC5D,NPC2,APOL2,HSD17B7	6/120	TRUE	FALSE
16_Member	GO Biological Processes	GO:0016125	sterol metabolic process	-2.62271	-1.0874	949,2232,6309,10577,23780,51478	SCARB1,FDXR,SC5D,NPC2,APOL2,HSD17B7	6/132	TRUE	FALSE
16_Member	GO Biological Processes	GO:1902652	secondary alcohol metabolic process	-2.62271	-1.0874	949,2232,6309,10577,23780,51478	SCARB1,FDXR,SC5D,NPC2,APOL2,HSD17B7	6/132	TRUE	FALSE
16_Member	GO Biological Processes	GO:0006694	steroid biosynthetic process	-2.4773	-0.977392	231,706,2232,6309,51478	AKR1B1,TSPO,FDXR,SC5D,HSD17B7	5/98	TRUE	FALSE
16_Member	GO Biological Processes	GO:0120178	steroid hormone biosynthetic process	-2.37971	-0.901203	231,706,51478	AKR1B1,TSPO,HSD17B7	3/32	TRUE	FALSE
16_Member	Reactome Gene Sets	R-HSA-196071	Metabolism of steroid hormones	-2.23449	-0.792505	231,706,2232	AKR1B1,TSPO,FDXR	3/36	TRUE	FALSE
16_Member	GO Biological Processes	GO:0042446	hormone biosynthetic process	-1.99207	-0.619625	231,706,51478	AKR1B1,TSPO,HSD17B7	3/44	TRUE	FALSE
16_Member	Reactome Gene Sets	R-HSA-8957322	Metabolism of steroids	-1.67733	-0.376055	231,706,2232,6309,51478	AKR1B1,TSPO,FDXR,SC5D,HSD17B7	5/154	TRUE	FALSE
17_Summary	GO Biological Processes	GO:0019220	regulation of phosphate metabolic process	-7.34757	-4.86275	21,706,949,1917,2335,2621,3606,6622,8091,8844,9368,9555,11182,11277,23411,27010,27286,29775,51005,54625,80279,83666,199731,4837,9636,9709,4940,27237,55785,567,427,10409,5371,307,11240,26287,1278	ABCA3,TSPO,SCARB1,EEF1A2,FN1,GAS6,IL18,SNCA,HMGA2,KSR1,NHERF1,MACROH2A1,SLC2A6,TREX1,SIRT1,TPK1,SRPX2,CARD10,AMDHD2,PARP14,CDK5RAP3,PARP9,CADM4,NNMT,ISG15,HERPUD1,OAS3,ARHGEF16,FGD6,B2M,ASAH1,BASP1,PML,ANXA4,PADI2,ANKRD2,COL1A2	37/-	TRUE	TRUE
17_Member	GO Biological Processes	GO:0019220	regulation of phosphate metabolic process	-7.34757	-4.86275	21,706,949,1917,2335,2621,3606,6622,8091,8844,9368,9555,11182,11277,23411,27010,27286,29775,51005,54625,80279,83666,199731	ABCA3,TSPO,SCARB1,EEF1A2,FN1,GAS6,IL18,SNCA,HMGA2,KSR1,NHERF1,MACROH2A1,SLC2A6,TREX1,SIRT1,TPK1,SRPX2,CARD10,AMDHD2,PARP14,CDK5RAP3,PARP9,CADM4	23/586	TRUE	TRUE
17_Member	GO Biological Processes	GO:0051174	regulation of phosphorus metabolic process	-7.33418	-4.85688	21,706,949,1917,2335,2621,3606,6622,8091,8844,9368,9555,11182,11277,23411,27010,27286,29775,51005,54625,80279,83666,199731	ABCA3,TSPO,SCARB1,EEF1A2,FN1,GAS6,IL18,SNCA,HMGA2,KSR1,NHERF1,MACROH2A1,SLC2A6,TREX1,SIRT1,TPK1,SRPX2,CARD10,AMDHD2,PARP14,CDK5RAP3,PARP9,CADM4	23/587	TRUE	TRUE
17_Member	GO Biological Processes	GO:0042325	regulation of phosphorylation	-3.81305	-1.9896	1917,2335,2621,3606,8091,8844,9368,23411,27286,29775,54625,80279,83666,199731	EEF1A2,FN1,GAS6,IL18,HMGA2,KSR1,NHERF1,SIRT1,SRPX2,CARD10,PARP14,CDK5RAP3,PARP9,CADM4	14/431	TRUE	TRUE
17_Member	GO Biological Processes	GO:0001932	regulation of protein phosphorylation	-3.16954	-1.496	2335,2621,3606,8091,8844,9368,23411,29775,54625,80279,83666,199731	FN1,GAS6,IL18,HMGA2,KSR1,NHERF1,SIRT1,CARD10,PARP14,CDK5RAP3,PARP9,CADM4	12/387	TRUE	TRUE
17_Member	GO Biological Processes	GO:0031399	regulation of protein modification process	-2.97972	-1.35437	706,2335,2621,3606,4837,8091,8844,9368,9636,9709,23411,29775,54625,80279,83666,199731	TSPO,FN1,GAS6,IL18,NNMT,HMGA2,KSR1,NHERF1,ISG15,HERPUD1,SIRT1,CARD10,PARP14,CDK5RAP3,PARP9,CADM4	16/645	TRUE	TRUE
17_Member	GO Biological Processes	GO:0042327	positive regulation of phosphorylation	-2.32592	-0.858741	1917,2621,3606,8091,23411,29775,54625,83666	EEF1A2,GAS6,IL18,HMGA2,SIRT1,CARD10,PARP14,PARP9	8/254	TRUE	FALSE
17_Member	GO Biological Processes	GO:0043549	regulation of kinase activity	-2.30578	-0.843917	1917,2621,8091,8844,9368,23411,29775,80279	EEF1A2,GAS6,HMGA2,KSR1,NHERF1,SIRT1,CARD10,CDK5RAP3	8/256	TRUE	FALSE
17_Member	GO Biological Processes	GO:0010562	positive regulation of phosphorus metabolic process	-2.23482	-0.792505	1917,2621,3606,6622,8091,23411,29775,54625,83666	EEF1A2,GAS6,IL18,SNCA,HMGA2,SIRT1,CARD10,PARP14,PARP9	9/320	TRUE	FALSE
17_Member	GO Biological Processes	GO:0045937	positive regulation of phosphate metabolic process	-2.23482	-0.792505	1917,2621,3606,6622,8091,23411,29775,54625,83666	EEF1A2,GAS6,IL18,SNCA,HMGA2,SIRT1,CARD10,PARP14,PARP9	9/320	TRUE	FALSE
17_Member	GO Biological Processes	GO:0001934	positive regulation of protein phosphorylation	-2.0095	-0.632494	2621,3606,8091,23411,29775,54625,83666	GAS6,IL18,HMGA2,SIRT1,CARD10,PARP14,PARP9	7/231	TRUE	FALSE
17_Member	GO Biological Processes	GO:0045859	regulation of protein kinase activity	-1.98079	-0.610731	2621,8091,8844,9368,23411,29775,80279	GAS6,HMGA2,KSR1,NHERF1,SIRT1,CARD10,CDK5RAP3	7/234	TRUE	FALSE
17_Member	GO Biological Processes	GO:0051338	regulation of transferase activity	-1.88029	-0.533961	1917,2621,8091,8844,9368,23411,29775,80279	EEF1A2,GAS6,HMGA2,KSR1,NHERF1,SIRT1,CARD10,CDK5RAP3	8/304	TRUE	FALSE
17_Member	GO Biological Processes	GO:0033674	positive regulation of kinase activity	-1.87512	-0.530329	1917,2621,8091,23411,29775	EEF1A2,GAS6,HMGA2,SIRT1,CARD10	5/137	TRUE	FALSE
17_Member	GO Biological Processes	GO:0050790	regulation of catalytic activity	-1.86127	-0.519545	1917,2621,4940,8091,8844,9368,23411,27237,29775,55785,80279,83666	EEF1A2,GAS6,OAS3,HMGA2,KSR1,NHERF1,SIRT1,ARHGEF16,CARD10,FGD6,CDK5RAP3,PARP9	12/565	TRUE	FALSE
17_Member	GO Biological Processes	GO:0031401	positive regulation of protein modification process	-1.8148	-0.483981	2621,3606,4837,8091,23411,29775,54625,80279,83666	GAS6,IL18,NNMT,HMGA2,SIRT1,CARD10,PARP14,CDK5RAP3,PARP9	9/375	TRUE	FALSE
17_Member	GO Biological Processes	GO:2000772	regulation of cellular senescence	-1.70995	-0.401031	567,8091,23411	B2M,HMGA2,SIRT1	3/56	TRUE	FALSE
17_Member	GO Molecular Functions	GO:0003714	transcription corepressor activity	-1.64134	-0.34924	427,8091,10409,23411,54625,83666	ASAH1,HMGA2,BASP1,SIRT1,PARP14,PARP9	6/214	TRUE	FALSE
17_Member	GO Biological Processes	GO:0051347	positive regulation of transferase activity	-1.60409	-0.317051	1917,2621,8091,23411,29775	EEF1A2,GAS6,HMGA2,SIRT1,CARD10	5/161	TRUE	FALSE
17_Member	GO Biological Processes	GO:0090398	cellular senescence	-1.55861	-0.281534	5371,8091,23411	PML,HMGA2,SIRT1	3/64	TRUE	FALSE
17_Member	GO Molecular Functions	GO:0061629	RNA polymerase II-specific DNA-binding transcription factor binding	-1.52458	-0.255005	307,427,8091,11240,23411,26287,80279,83666	ANXA4,ASAH1,HMGA2,PADI2,SIRT1,ANKRD2,CDK5RAP3,PARP9	8/355	TRUE	FALSE
17_Member	GO Biological Processes	GO:0071900	regulation of protein serine/threonine kinase activity	-1.47219	-0.214694	8091,8844,23411,80279	HMGA2,KSR1,SIRT1,CDK5RAP3	4/119	TRUE	FALSE
17_Member	GO Biological Processes	GO:0045860	positive regulation of protein kinase activity	-1.37422	-0.137182	2621,8091,23411,29775	GAS6,HMGA2,SIRT1,CARD10	4/128	TRUE	FALSE
17_Member	GO Molecular Functions	GO:0046332	SMAD binding	-1.31462	-0.0909871	1278,5371,8091	COL1A2,PML,HMGA2	3/80	TRUE	FALSE
18_Summary	GO Molecular Functions	GO:0005509	calcium ion binding	-7.05473	-4.62457	307,649,1462,2312,2621,3339,3709,4054,4637,4811,5332,5357,6275,6620,6622,7059,9600,10165,11240,22795,23213,27445,57605,78987,83543	ANXA4,BMP1,VCAN,FLG,GAS6,HSPG2,ITPR2,LTBP3,MYL6,NID1,PLCB4,PLS1,S100A4,SNCB,SNCA,THBS3,PITPNM1,SLC25A13,PADI2,NID2,SULF1,PCLO,PITPNM2,CRELD1,AIF1L	25/-	TRUE	TRUE
18_Member	GO Molecular Functions	GO:0005509	calcium ion binding	-7.05473	-4.62457	307,649,1462,2312,2621,3339,3709,4054,4637,4811,5332,5357,6275,6620,6622,7059,9600,10165,11240,22795,23213,27445,57605,78987,83543	ANXA4,BMP1,VCAN,FLG,GAS6,HSPG2,ITPR2,LTBP3,MYL6,NID1,PLCB4,PLS1,S100A4,SNCB,SNCA,THBS3,PITPNM1,SLC25A13,PADI2,NID2,SULF1,PCLO,PITPNM2,CRELD1,AIF1L	25/708	TRUE	TRUE
19_Summary	GO Cellular Components	GO:0030055	cell-substrate junction	-6.90032	-4.49732	527,567,950,1264,1466,1803,2191,2275,3339,3383,3685,3690,3897,3909,4162,5244,26136,83481,83543	ATP6V0C,B2M,SCARB2,CNN1,CSRP2,DPP4,FAP,FHL3,HSPG2,ICAM1,ITGAV,ITGB3,L1CAM,LAMA3,MCAM,ABCB4,TES,EPPK1,AIF1L	19/-	TRUE	TRUE
19_Member	GO Cellular Components	GO:0030055	cell-substrate junction	-6.90032	-4.49732	527,567,950,1264,1466,1803,2191,2275,3339,3383,3685,3690,3897,3909,4162,5244,26136,83481,83543	ATP6V0C,B2M,SCARB2,CNN1,CSRP2,DPP4,FAP,FHL3,HSPG2,ICAM1,ITGAV,ITGB3,L1CAM,LAMA3,MCAM,ABCB4,TES,EPPK1,AIF1L	19/433	TRUE	TRUE
19_Member	GO Cellular Components	GO:0005925	focal adhesion	-5.71253	-3.57157	527,567,950,1264,1466,1803,2191,2275,3339,3383,3685,3690,3897,4162,5244,26136,83543	ATP6V0C,B2M,SCARB2,CNN1,CSRP2,DPP4,FAP,FHL3,HSPG2,ICAM1,ITGAV,ITGB3,L1CAM,MCAM,ABCB4,TES,AIF1L	17/423	TRUE	TRUE
20_Summary	GO Biological Processes	GO:0009259	ribonucleotide metabolic process	-6.61507	-4.24985	100,516,517,518,527,669,978,2027,6799,6817,6818,10165,10380,55526,80201,445329,84303,6648,55902,291,2882,3709,5332,6310,6622,6712,10381,347733,1278,4313,730,2953,653689,2131,2762,51005,55808,727936,358,2149,2621,3685,11194,57380,84419,567,4241,6583,9368	ADA,ATP5MC1,ATP5MC2,ATP5MC3,ATP6V0C,BPGM,CDA,ENO3,SULT1A2,SULT1A1,SULT1A3,SLC25A13,BPNT1,DHTKD1,HKDC1,SULT1A4,CHCHD6,SOD2,ACSS2,SLC25A4,GPX7,ITPR2,PLCB4,ATXN1,SNCA,SPTBN2,TUBB3,TUBB2B,COL1A2,MMP2,C7,GSTT2,GSTT2B,EXT1,GMDS,AMDHD2,ST6GALNAC1,GXYLT2,AQP1,F2R,GAS6,ITGAV,ABCB8,MRS2,C15orf48,B2M,MELTF,SLC22A4,NHERF1	49/-	TRUE	TRUE
20_Member	GO Biological Processes	GO:0009259	ribonucleotide metabolic process	-6.61507	-4.24985	100,516,517,518,527,669,978,2027,6799,6817,6818,10165,10380,55526,80201,445329	ADA,ATP5MC1,ATP5MC2,ATP5MC3,ATP6V0C,BPGM,CDA,ENO3,SULT1A2,SULT1A1,SULT1A3,SLC25A13,BPNT1,DHTKD1,HKDC1,SULT1A4	16/322	TRUE	TRUE
20_Member	GO Biological Processes	GO:0019693	ribose phosphate metabolic process	-6.48978	-4.13254	100,516,517,518,527,669,978,2027,6799,6817,6818,10165,10380,55526,80201,445329	ADA,ATP5MC1,ATP5MC2,ATP5MC3,ATP6V0C,BPGM,CDA,ENO3,SULT1A2,SULT1A1,SULT1A3,SLC25A13,BPNT1,DHTKD1,HKDC1,SULT1A4	16/329	TRUE	TRUE
20_Member	GO Biological Processes	GO:0009150	purine ribonucleotide metabolic process	-6.25356	-3.9553	100,516,517,518,527,669,2027,6799,6817,6818,10165,10380,55526,80201,445329	ADA,ATP5MC1,ATP5MC2,ATP5MC3,ATP6V0C,BPGM,ENO3,SULT1A2,SULT1A1,SULT1A3,SLC25A13,BPNT1,DHTKD1,HKDC1,SULT1A4	15/301	TRUE	TRUE
20_Member	GO Cellular Components	GO:0033177	proton-transporting two-sector ATPase complex, proton-transporting domain	-4.87981	-2.85592	516,517,518,527	ATP5MC1,ATP5MC2,ATP5MC3,ATP6V0C	4/15	FALSE	TRUE
20_Member	GO Biological Processes	GO:0009144	purine nucleoside triphosphate metabolic process	-4.24569	-2.32637	100,516,517,518,527,669,2027,10165,55526,80201	ADA,ATP5MC1,ATP5MC2,ATP5MC3,ATP6V0C,BPGM,ENO3,SLC25A13,DHTKD1,HKDC1	10/207	TRUE	TRUE
20_Member	GO Biological Processes	GO:0046034	ATP metabolic process	-4.04518	-2.16769	516,517,518,527,669,2027,10165,55526,80201	ATP5MC1,ATP5MC2,ATP5MC3,ATP6V0C,BPGM,ENO3,SLC25A13,DHTKD1,HKDC1	9/177	TRUE	TRUE
20_Member	GO Biological Processes	GO:0009141	nucleoside triphosphate metabolic process	-3.97719	-2.11763	100,516,517,518,527,669,2027,10165,55526,80201	ADA,ATP5MC1,ATP5MC2,ATP5MC3,ATP6V0C,BPGM,ENO3,SLC25A13,DHTKD1,HKDC1	10/223	TRUE	TRUE
20_Member	GO Biological Processes	GO:0009205	purine ribonucleoside triphosphate metabolic process	-3.64533	-1.86159	516,517,518,527,669,2027,10165,55526,80201	ATP5MC1,ATP5MC2,ATP5MC3,ATP6V0C,BPGM,ENO3,SLC25A13,DHTKD1,HKDC1	9/200	TRUE	TRUE
20_Member	GO Biological Processes	GO:0009199	ribonucleoside triphosphate metabolic process	-3.53493	-1.77379	516,517,518,527,669,2027,10165,55526,80201	ATP5MC1,ATP5MC2,ATP5MC3,ATP6V0C,BPGM,ENO3,SLC25A13,DHTKD1,HKDC1	9/207	TRUE	TRUE
20_Member	Reactome Gene Sets	R-HSA-8949613	Cristae formation	-3.46575	-1.71839	516,517,518,84303	ATP5MC1,ATP5MC2,ATP5MC3,CHCHD6	4/33	FALSE	TRUE
20_Member	Reactome Gene Sets	R-HSA-1592230	Mitochondrial biogenesis	-3.33968	-1.62047	516,517,518,6648,55902,84303	ATP5MC1,ATP5MC2,ATP5MC3,SOD2,ACSS2,CHCHD6	6/96	TRUE	TRUE
20_Member	Reactome Gene Sets	R-HSA-163210	Formation of ATP by chemiosmotic coupling	-2.97915	-1.35437	516,517,518	ATP5MC1,ATP5MC2,ATP5MC3	3/20	FALSE	TRUE
20_Member	GO Biological Processes	GO:0009260	ribonucleotide biosynthetic process	-2.84987	-1.26079	100,516,517,518,527,978,10165	ADA,ATP5MC1,ATP5MC2,ATP5MC3,ATP6V0C,CDA,SLC25A13	7/162	TRUE	FALSE
20_Member	GO Cellular Components	GO:0045259	proton-transporting ATP synthase complex	-2.79765	-1.22183	516,517,518	ATP5MC1,ATP5MC2,ATP5MC3	3/23	FALSE	FALSE
20_Member	GO Biological Processes	GO:0046390	ribose phosphate biosynthetic process	-2.75958	-1.19454	100,516,517,518,527,978,10165	ADA,ATP5MC1,ATP5MC2,ATP5MC3,ATP6V0C,CDA,SLC25A13	7/168	TRUE	FALSE
20_Member	GO Biological Processes	GO:0006754	ATP biosynthetic process	-2.72451	-1.16589	516,517,518,527,10165	ATP5MC1,ATP5MC2,ATP5MC3,ATP6V0C,SLC25A13	5/86	TRUE	FALSE
20_Member	GO Cellular Components	GO:0016469	proton-transporting two-sector ATPase complex	-2.71098	-1.15495	516,517,518,527	ATP5MC1,ATP5MC2,ATP5MC3,ATP6V0C	4/52	FALSE	FALSE
20_Member	GO Biological Processes	GO:0009206	purine ribonucleoside triphosphate biosynthetic process	-2.49648	-0.991467	516,517,518,527,10165	ATP5MC1,ATP5MC2,ATP5MC3,ATP6V0C,SLC25A13	5/97	TRUE	FALSE
20_Member	GO Biological Processes	GO:0009145	purine nucleoside triphosphate biosynthetic process	-2.4773	-0.977392	516,517,518,527,10165	ATP5MC1,ATP5MC2,ATP5MC3,ATP6V0C,SLC25A13	5/98	TRUE	FALSE
20_Member	GO Biological Processes	GO:0009152	purine ribonucleotide biosynthetic process	-2.40626	-0.921437	100,516,517,518,527,10165	ADA,ATP5MC1,ATP5MC2,ATP5MC3,ATP6V0C,SLC25A13	6/146	TRUE	FALSE
20_Member	GO Biological Processes	GO:0009201	ribonucleoside triphosphate biosynthetic process	-2.38483	-0.903179	516,517,518,527,10165	ATP5MC1,ATP5MC2,ATP5MC3,ATP6V0C,SLC25A13	5/103	TRUE	FALSE
20_Member	KEGG Pathway	hsa05022	Pathways of neurodegeneration - multiple diseases	-2.3716	-0.894549	291,516,517,518,2882,3709,5332,6310,6622,6712,10381,347733	SLC25A4,ATP5MC1,ATP5MC2,ATP5MC3,GPX7,ITPR2,PLCB4,ATXN1,SNCA,SPTBN2,TUBB3,TUBB2B	12/483	TRUE	FALSE
20_Member	KEGG Pathway	hsa05016	Huntington disease	-2.31373	-0.849088	291,516,517,518,2882,5332,6648,10381,347733	SLC25A4,ATP5MC1,ATP5MC2,ATP5MC3,GPX7,PLCB4,SOD2,TUBB3,TUBB2B	9/311	TRUE	FALSE
20_Member	KEGG Pathway	hsa05415	Diabetic cardiomyopathy	-2.28168	-0.823862	291,516,517,518,1278,4313,5332	SLC25A4,ATP5MC1,ATP5MC2,ATP5MC3,COL1A2,MMP2,PLCB4	7/205	TRUE	FALSE
20_Member	GO Biological Processes	GO:0009142	nucleoside triphosphate biosynthetic process	-2.24772	-0.797985	516,517,518,527,10165	ATP5MC1,ATP5MC2,ATP5MC3,ATP6V0C,SLC25A13	5/111	TRUE	FALSE
20_Member	GO Biological Processes	GO:0015986	proton motive force-driven ATP synthesis	-2.17895	-0.752059	516,517,518,527	ATP5MC1,ATP5MC2,ATP5MC3,ATP6V0C	4/73	FALSE	FALSE
20_Member	KEGG Pathway	hsa05012	Parkinson disease	-2.1614	-0.739577	291,516,517,518,3709,6622,10381,347733	SLC25A4,ATP5MC1,ATP5MC2,ATP5MC3,ITPR2,SNCA,TUBB3,TUBB2B	8/271	TRUE	FALSE
20_Member	KEGG Pathway	hsa05020	Prion disease	-2.09781	-0.694806	291,516,517,518,730,3709,10381,347733	SLC25A4,ATP5MC1,ATP5MC2,ATP5MC3,C7,ITPR2,TUBB3,TUBB2B	8/278	TRUE	FALSE
20_Member	KEGG Pathway	hsa05208	Chemical carcinogenesis - reactive oxygen species	-2.04858	-0.66231	291,516,517,518,2953,6648,653689	SLC25A4,ATP5MC1,ATP5MC2,ATP5MC3,GSTT2,SOD2,GSTT2B	7/227	TRUE	FALSE
20_Member	Reactome Gene Sets	R-HSA-1852241	Organelle biogenesis and maintenance	-1.93613	-0.575316	516,517,518,6648,10381,55902,84303,347733	ATP5MC1,ATP5MC2,ATP5MC3,SOD2,TUBB3,ACSS2,CHCHD6,TUBB2B	8/297	TRUE	FALSE
20_Member	GO Biological Processes	GO:1901137	carbohydrate derivative biosynthetic process	-1.92254	-0.562526	100,516,517,518,527,978,2131,2762,10165,51005,55808,727936	ADA,ATP5MC1,ATP5MC2,ATP5MC3,ATP6V0C,CDA,EXT1,GMDS,SLC25A13,AMDHD2,ST6GALNAC1,GXYLT2	12/554	TRUE	FALSE
20_Member	GO Molecular Functions	GO:0015078	proton transmembrane transporter activity	-1.90005	-0.547566	291,516,517,518,527,10165	SLC25A4,ATP5MC1,ATP5MC2,ATP5MC3,ATP6V0C,SLC25A13	6/187	TRUE	FALSE
20_Member	GO Biological Processes	GO:1902600	proton transmembrane transport	-1.88957	-0.540417	291,516,517,518,527,10165	SLC25A4,ATP5MC1,ATP5MC2,ATP5MC3,ATP6V0C,SLC25A13	6/188	TRUE	FALSE
20_Member	GO Biological Processes	GO:0098662	inorganic cation transmembrane transport	-1.88764	-0.539776	291,358,516,517,518,527,2149,2621,3685,3709,5332,10165,11194,57380	SLC25A4,AQP1,ATP5MC1,ATP5MC2,ATP5MC3,ATP6V0C,F2R,GAS6,ITGAV,ITPR2,PLCB4,SLC25A13,ABCB8,MRS2	14/698	TRUE	FALSE
20_Member	GO Biological Processes	GO:0098655	monoatomic cation transmembrane transport	-1.81522	-0.483981	291,358,516,517,518,527,2149,2621,3685,3709,5332,10165,11194,57380	SLC25A4,AQP1,ATP5MC1,ATP5MC2,ATP5MC3,ATP6V0C,F2R,GAS6,ITGAV,ITPR2,PLCB4,SLC25A13,ABCB8,MRS2	14/713	TRUE	FALSE
20_Member	KEGG Pathway	hsa05010	Alzheimer disease	-1.70976	-0.401031	291,516,517,518,3709,5332,6622,10381,347733	SLC25A4,ATP5MC1,ATP5MC2,ATP5MC3,ITPR2,PLCB4,SNCA,TUBB3,TUBB2B	9/391	TRUE	FALSE
20_Member	GO Cellular Components	GO:0098803	respiratory chain complex	-1.50702	-0.242242	516,517,518,84419	ATP5MC1,ATP5MC2,ATP5MC3,C15orf48	4/116	FALSE	FALSE
20_Member	GO Biological Processes	GO:0098660	inorganic ion transmembrane transport	-1.48327	-0.22199	291,358,516,517,518,527,2149,2621,3685,3709,5332,10165,11194,57380	SLC25A4,AQP1,ATP5MC1,ATP5MC2,ATP5MC3,ATP6V0C,F2R,GAS6,ITGAV,ITPR2,PLCB4,SLC25A13,ABCB8,MRS2	14/790	TRUE	FALSE
20_Member	GO Biological Processes	GO:0030001	metal ion transport	-1.37798	-0.139819	358,567,2149,2621,3685,3709,4241,5332,6583,9368,11194,57380	AQP1,B2M,F2R,GAS6,ITGAV,ITPR2,MELTF,PLCB4,SLC22A4,NHERF1,ABCB8,MRS2	12/667	TRUE	FALSE
