# Supplementary material for: A severe neurodevelopmental syndrome linked to a South Asian founder variant in the UFMylation adaptor CDK5RAP3
Source: Acta Neuropathol. 2026 Apr 27;151(1):48. doi: 10.1007/s00401-026-03017-2 (PMC13121207; doi:10.1007/s00401-026-03017-2)
Supplement: Supplementary file 4 — Supplementary file4 (XLSX 9930 KB) [file 401_2026_3017_MOESM4_ESM.xlsx]

## Sheet: Differential Expression - All
Comparison	Uniprot_Accession	Gene_Name	Log2_Fold_Change	Average_Log2_Expression	T_Statistic	P_Value	Q_Value	B_Log_Odds	C4_ASO-S_1	C4_ASO-S_2	C4_ASO-S_3	C4_ASO-T_1	C4_ASO-T_2	C4_ASO-T_3	II:3_ASO-S_1	II:3_ASO-S_2	II:3_ASO-S_3	II:3_ASO-T_1	II:3_ASO-T_2	II:3_ASO-T_3
Con_Pmod_vs_Con_Scr	A0A024R161:P50151	DNAJC25-GNG10:GNG10	0.7680086624683469	16.590971313332577	2.647723298930178	0.023722571685753004	0.5034850289125489	-3.25622	16.03025485136741	16.047893820796197	16.290648374676973	16.98579972843063	16.911473693227396	16.775549612587586	16.088208606003374	17.513756625112684	17.118566772656983	16.76633952935074	16.28964832840285	16.273515817378108
Con_Pmod_vs_Con_Scr	A0A087WUG6:H7C3R7:P01241:Q9NSC5:A0A3B3ISS9	CSH1:CSHL1:GH1:HOMER3:NA	-0.326505	18.110565181824285	-3.66774	0.00407938	0.35955570409741777	-1.69107	18.224310119706654	18.192889620041186	17.96087668974284	17.707031339874753	17.68732518024595	18.00420532861711	18.617913174790953	18.47906336086404	18.52875388084659	17.99965743214243	18.008900287781888	17.91585576723704
Con_Pmod_vs_Con_Scr	A0A087WWU8	TPM3	-0.0384291	20.246233490633475	-0.488607	0.635287	0.9130565070235273	-5.81361	20.33479705744832	20.0441	20.10922976672096	20.091860296884843	20.087225507300673	20.19370600461815	20.51479715863471	20.24546626964824	20.33798346777587	20.326935048885687	20.3093	20.35946025907163
Con_Pmod_vs_Con_Scr	A0A087WY03	SREK1	0.0291886	18.761260998459342	0.3379937651032502	0.7421101845067282	0.9427645100362444	-5.87604	18.525569309782448	18.80112006467991	18.8609	18.83949555087096	18.737467084175925	18.69818789679755	18.862487953068207	19.077704430865744	18.87500721196095	18.58766666016992	18.694121635929537	18.575408947029665
Con_Pmod_vs_Con_Scr	A0A087X1S3	HUWE1	0.12119739923678452	15.406387190164901	1.8904685217298272	0.0869395	0.6281257847486555	-4.38361	15.251205057097696	15.377374677381274	15.34233949347878	15.316648324052036	15.60123422418896	15.416628877427115	15.469192060202673	15.465057022122568	15.360806921215326	15.39380900826265	15.46400527883086	15.418345337718868
Con_Pmod_vs_Con_Scr	A0A087X243	GSTP1	0.0790349	23.413855152124157	0.6243095818212988	0.5459120663942956	0.8793922318658609	-5.73893	23.23642178589456	23.315852033918844	23.54332703845095	23.550616160115258	23.344867541056228	23.437221774688915	23.377431069809735	23.89449604193349	23.59697085534395	23.309223139486978	23.29783048750741	23.062003897283567
Con_Pmod_vs_Con_Scr	A0A096LP01	SMIM26	-0.134889	14.847995771127394	-1.41653	0.18594934849234843	0.7166493874067474	-5.00351	15.01813509157084	14.94770011386954	14.69788455137569	14.710170978048478	14.782496169542368	14.766386575988086	14.90954141142022	14.803555451019156	14.991467344628052	14.853501368099296	14.674238201317994	15.020871996649005
Con_Pmod_vs_Con_Scr	A0A096LP25:Q6ZSR9	AAK1:NA	-0.010785	20.833241141612923	-0.430642	0.6755410424406436	0.9245835873384326	-5.84023	20.818791728084072	20.84011984835814	20.77967091918888	20.807040204480614	20.81038716685945	20.78880014541147	20.881317819451763	20.85953711870424	20.920829793530892	20.826828320635546	20.801412632788168	20.86415800186184
Con_Pmod_vs_Con_Scr	A0A0A0MRP6	SMARCA1	0.10301134001488421	11.023611278141576	1.8396986861847753	0.0945778	0.6431153643512275	-4.45438	10.989914490062514	11.136912485527596	11.071467139414866	11.164660666045627	11.108484430299566	11.23418303870443	10.926270186036495	10.840579518559368	10.800250932991876	10.968704311122758	11.110980471727972	10.930927667205856
Con_Pmod_vs_Con_Scr	A0A0A0MRY4:Q96N96	NA:SPATA13	0.15853593578808756	12.792659043505067	2.9538450196211663	0.0139136	0.44762746121492164	-2.78268	12.563411842116729	12.552663291628912	12.722462776710568	12.79362197349371	12.853649946920756	12.666873797405987	12.8349	12.919410799574042	12.839790948011526	12.910521627727846	12.918072711868348	12.936550017776169
Con_Pmod_vs_Con_Scr	A0A0A6YYH9:Q9BRT8:Q8IUF1:Q5JTY5:Q6NVZ8:H0Y5V3	CBWD5:ZNG1A:ZNG1B:ZNG1C:ZNG1E:ZNG1F	0.012624485482916725	17.70875251883713	0.4007019037461275	0.6967703160408226	0.9289399863210668	-5.85272	17.634682117316302	17.64324562821421	17.689389822264758	17.671806945175426	17.653871956836106	17.67951212223249	17.81182618736125	17.793462132365384	17.690022309510873	17.71946517739553	17.762016221372313	17.755729606000905
Con_Pmod_vs_Con_Scr	A0A0A6YYK5:Q96BK5	NA:PINX1	0.0766592	13.604944232577402	1.728579435673085	0.1134894329310615	0.6633985059795674	-4.60605	13.602703731318517	13.55453104725024	13.530005445821985	13.65113545084481	13.671982101794976	13.594100381866884	13.611509316031771	13.594	13.63418429781746	13.594440690649613	13.510504269639988	13.710225949649873
Con_Pmod_vs_Con_Scr	A0A0B4J269:Q13509	NA:TUBB3	0.00307337	17.209084875294685	0.0709337	0.9447997682822674	0.9875493851650333	-5.93145	17.327947607501088	17.37798257552357	17.306811961435045	17.354176290177165	17.389812044085033	17.27797392344631	16.990788162583094	16.975387431557245	17.04284765454733	17.13418938772775	17.08441999674727	17.246681468205317
Con_Pmod_vs_Con_Scr	A0A0B4J293:Q96EP0	NA:RNF31	0.049704447078612546	15.506291032285622	1.5772352533464096	0.14473	0.694261	-4.80456	15.490741764496608	15.508539582433723	15.536414767579378	15.57846896089996	15.552938649197488	15.55340184564809	15.437212512650014	15.484303904633393	15.525386111664792	15.4924	15.510704584993418	15.405
Con_Pmod_vs_Con_Scr	A0A0B4J2A0:Q9UHJ6	NA:SHPK	0.0194801	18.059705554009906	0.7968396811976051	0.4434035420826117	0.8447479057361653	-5.62004	18.07705165089801	18.061227632808865	18.12096439474412	18.118168761856303	18.091156873058697	18.108358353720167	18.010860668149505	18.03889778166645	17.959419481581573	18.037715147157943	18.049796097847175	18.04284980463005
Con_Pmod_vs_Con_Scr	A0A0C4DFN3	MGLL	-0.0182428	25.840485602459797	-0.359136	0.7266974118704999	0.9372527604391676	-5.86861	25.75804240000314	25.763215691886085	25.71760273633162	25.723890111311015	25.77895557706198	25.68128683131153	26.03536497031225	25.86905466944437	25.937172107343425	25.885564924881884	25.89063837466037	26.04503883496988
Con_Pmod_vs_Con_Scr	A0A0C4DFT3	DLG1	0.00207911	23.776022783623922	0.0678432	0.9472006450983255	0.9877182362068813	-5.93167	23.674111288023195	23.781801552507865	23.76499999286622	23.729394453381538	23.772096454459636	23.72565924374415	23.770559287978873	23.806276231406702	23.76638947052027	23.82790971926012	23.875593136188424	23.817482573150055
Con_Pmod_vs_Con_Scr	A0A0C4DFX4:Q6ZRS2	NA:SRCAP	-0.0486048	13.315402153156752	-1.27724	0.22936981776733623	0.7387203027034835	-5.16456	13.285657601593538	13.2569	13.19399539596692	13.161043338763816	13.178894855307403	13.250751347818513	13.52539931654435	13.389183925414288	13.443771698814665	13.35550142894252	13.385336016321556	13.358439904525554
Con_Pmod_vs_Con_Scr	A0A0C4DG40	SYNE1	-0.030229	17.64384054394393	-0.774599	0.4558730661917243	0.8479055457704144	-5.63681	17.888545845626904	17.848260010738816	17.805003008394554	17.81567029135496	17.776297304197662	17.859154243099926	17.469131499246554	17.50447228408688	17.417964984342216	17.44636019531619	17.37943408104096	17.515792779881533
Con_Pmod_vs_Con_Scr	A0A0C4DG89	DDX46	-0.0194484	18.940419339698668	-0.838218	0.42080700699931783	0.8348664894343217	-5.58774	18.94058555229425	18.919325385453316	18.92969774480865	18.902737771935197	18.890346704059933	18.938179036738635	19.013262345118324	18.961157735722647	18.96124183736447	18.939127729781184	18.97118162882849	18.91818860427891
Con_Pmod_vs_Con_Scr	A0A0C4DGB9	PPA2	0.10803864190064871	17.35419356294391	1.4361425225553903	0.18043160944647918	0.7137532972740651	-4.97995	17.303676214242074	17.270974632914296	17.309773275199586	17.457096409355234	17.446493167236582	17.304950471466082	17.21833556043597	17.359463302575943	17.567860681476265	17.406035670112054	17.3104	17.295270784055624
Con_Pmod_vs_Con_Scr	A0A0C4DGP4	PRKCSH	0.00160284	18.348465165743782	0.0190108	0.9851932887800777	0.9963390612660096	-5.93384	18.4739	18.211922383345076	18.2059	18.15624210715026	18.372651904950857	18.36758317015195	18.31853931093301	18.095483016675168	18.258981432480187	18.609667101873335	18.57690350950039	18.53386177323405
Con_Pmod_vs_Con_Scr	A0A0D9SF54	SPTAN1	-0.0784833	22.145846754492155	-0.902979	0.3870291584624884	0.8232706972852815	-5.53436	22.332298504879795	22.15130435731211	22.142874393843226	22.20911797841196	22.087499054610714	22.094410228204495	22.155240421759345	22.112833731995575	22.16182159992621	22.088277865878013	21.9073	22.307175303209625
Con_Pmod_vs_Con_Scr	A0A0D9SF91	UBE3A	-0.0976451	16.164452381786106	-1.26064	0.2350599448590117	0.7392859702681261	-5.18298	16.285960819654115	16.116792630086998	16.12381873476648	16.039369376441766	16.104303517824555	16.089964133363065	16.406662228464022	16.055267410423482	16.202570534168572	16.133600241000696	16.168328720354303	16.246790234885207
Con_Pmod_vs_Con_Scr	A0A0G2JLL3:Q9UMR5	NA:PPT2	0.20964616240604306	1.4089930345443347	1.4572599677172606	0.17464749815928307	0.7095296467100889	-4.95434	1.2386520545206956	1.498895746241102	1.4990731549947751	1.7936139776993905	1.6112182756605016	1.4607271896148095	0.96741	1.5565886973790397	1.4634854899440626	1.337881833016425	1.1676089128203522	1.3127609415707244
Con_Pmod_vs_Con_Scr	A0A0G2JNU3	BDP1	-0.0329374	14.546867371577672	-0.499901	0.6275808279540478	0.9092250255657002	-5.80805	14.552220343230069	14.558630075332845	14.43813030259172	14.478614056297618	14.547530765105414	14.424023713221487	14.61779485062459	14.414064971485711	14.689992339062409	14.590919052257142	14.573962020353664	14.676525969369411
Con_Pmod_vs_Con_Scr	A0A0G2JNZ2	SCRIB	-0.0247607	21.680115989741864	-1.51438	0.1597950578850667	0.7015683198173703	-4.88393	21.665438819740096	21.688522819952563	21.675474484950907	21.647836818097215	21.65425053531509	21.653066791988724	21.711344161513896	21.717507868918126	21.700781934552285	21.677658899515624	21.682950456395737	21.686558285962125
Con_Pmod_vs_Con_Scr	A0A0J9YW13:Q9Y5S9	NA:RBM8A	-0.0224931	15.671872807273743	-0.695147	0.50224	0.8605521265437722	-5.69327	15.614530395285936	15.676574531355564	15.64710199056224	15.591545856496673	15.642539220964416	15.63664267396648	15.739064295807726	15.699058034754518	15.735905044051254	15.691934006357725	15.75754213003785	15.630035507644546
Con_Pmod_vs_Con_Scr	A0A0J9YXH6:Q6P996:Q6P474	LOC124900586:PDXDC1:PDXDC2P	-0.051762	26.585965988958627	-2.30149	0.0432657	0.5358613997467039	-3.78431	26.701540062250608	26.70674497152936	26.67271471817461	26.657700797879848	26.641065444251556	26.626947611315636	26.586070540481003	26.570838484200095	26.621411333905915	26.412710732453128	26.387935668148195	26.445911502913553
Con_Pmod_vs_Con_Scr	A0A0J9YY24	TAF15	-0.00559349	12.1872	-0.100432	0.9219164713791684	0.9825557355102871	-5.92888	12.032662993714494	12.135524860354522	12.22725321733573	12.14576255472633	12.139351948096913	12.09354609339201	12.217395296432398	12.36943525626341	12.163138974126651	12.223	12.267705663837331	12.231856107058311
Con_Pmod_vs_Con_Scr	A0A0M3HER2	CENPV	0.0903873	16.588981365042383	1.8491845505879434	0.0931053	0.6406574806734774	-4.44122	16.481594287375366	16.443632498479182	16.563870344896678	16.59532038889559	16.618051311071802	16.54688719740047	16.557019760407087	16.76256226228031	16.64803881030207	16.654056867948572	16.597285818628386	16.599456832823098
Con_Pmod_vs_Con_Scr	A0A0S2Z377	ANXA6	-0.0592745	27.47800197028828	-1.98013	0.0748314	0.6072399246281939	-4.25661	27.511255571017703	27.52899667100272	27.427164792897187	27.400490328743523	27.44203731738031	27.44706599026495	27.47865388222128	27.46354156460484	27.52017591230511	27.513124379903605	27.477019167114484	27.526498066003622
Con_Pmod_vs_Con_Scr	A0A0U1RQE4	SH3D19	0.0570957	21.407651544375135	1.549343806474155	0.15125357052305638	0.6959371304673119	-4.84001	21.28115480666445	21.320373067636705	21.400768572622148	21.405227328544225	21.39089162731412	21.37746453180447	21.39879347864547	21.49034824356742	21.36707790179786	21.482225308845976	21.51517871491969	21.462314950139103
Con_Pmod_vs_Con_Scr	A0A0U1RQV1	ERVK3-1	-0.5163	17.562421204976314	-4.63251	8.470710350228944e-4	0.21334913745312073	-0.313949	17.959045366561238	17.884633217042648	17.73744235737679	17.259891291430094	17.40215716717039	17.370172758271192	17.651128963326833	17.17307493073766	17.32914851635811	17.560153657350888	17.613822002023905	17.808384232066015
Con_Pmod_vs_Con_Scr	A0A0U1RR11:P0DPI3:A0A0U1RRI6	CENPVL1:CENPVL2:CENPVL3	0.0523949	8.565283257197747	0.9676094824297937	0.3552622141041668	0.8054573795537711	-5.47777	8.480479863185977	8.351474132921254	8.5089	8.44308	8.52613	8.52883	8.631413789491763	8.693317836223837	8.61823	8.712796589950578	8.735928545859268	8.55283
Con_Pmod_vs_Con_Scr	A0A0U1RR49	SEC24C	-0.0594487	4.422091469651679	-0.295804	0.7732178408861184	0.9541895079314293	-5.88955	4.469608369975209	4.5670998598837365	4.277532189768797	4.5512722146386935	3.9005332968068327	4.68409	4.79243	4.4753382280024985	4.212309783266825	4.234737799288325	4.327843746034458	4.572301133557298
Con_Pmod_vs_Con_Scr	A0A0U1RRE5	NBDY	0.13005961911282782	13.873316029264005	3.1380913190166573	0.010103457649761534	0.40001201681270493	-2.49779	13.963733445500914	13.876071046326086	13.845884836799785	13.98502586574715	14.076474296952297	14.014368023265842	13.834515391204164	13.74684499628475	13.817976573910093	13.769872024380422	13.716081499064412	13.832944351732154
Con_Pmod_vs_Con_Scr	A0A0U1RRM4	PTBP1	0.0571928	10.020836201681394	1.2994434688054814	0.22193391885152486	0.7354576507643895	-5.13965	9.991442209982306	9.92913	9.918467705667222	10.082358725677365	9.9269	10.001355123092631	10.052747048020242	10.01454240222849	10.069979235227812	10.080469154812532	10.022161130786293	10.160477317367713
Con_Pmod_vs_Con_Scr	A0A140T941	HLA-A	-0.0016832	26.03869496260611	-0.0113344	0.9911717474576904	0.9981913773971924	-5.93396	25.871964805882836	25.91518965842042	26.15140580434108	25.899465076025237	25.896219053832308	26.137826534482898	26.080890456407168	26.27725942215352	25.872461907483597	26.16193698574758	26.392450603570992	25.807269242925702
Con_Pmod_vs_Con_Scr	A0A140T9L0	WDR46	0.010535705964564102	19.9961	0.3720155371441102	0.7173701360719178	0.9345001222922931	-5.86386	19.943508907479888	19.899076298909765	19.960304111854835	19.949756856403813	19.913854626782257	19.97088495295213	20.05539824936868	20.111967792281376	20.01382442101188	20.054184645872297	20.0488	20.031718318637893
Con_Pmod_vs_Con_Scr	A0A140T9W2	HLA-C	-0.0877969	17.117386791229734	-0.608514	0.5559394498088618	0.8843282053568271	-5.7485	17.812870368349532	17.683805947459007	17.695148536839948	17.65052638649592	17.556075991125518	17.721831748565542	16.776699089906884	16.231500716810878	16.144984669287567	16.548313369544314	16.689852694417002	16.897031975954715
Con_Pmod_vs_Con_Scr	A0A1B0GTL5	RAB11FIP5	-0.0234467	25.162307212032314	-0.480649	0.6407441432955139	0.9143713518115782	-5.81746	25.222925193682567	25.185061098545297	25.132132905323424	25.21250831054111	25.125133259632666	25.13213761089889	25.162640118125587	25.132535989040857	25.19510431889065	25.13617959276444	25.050190892720178	25.261137254222085
Con_Pmod_vs_Con_Scr	A0A1B0GTR8:Q6NYC8	ANKFN1:PPP1R18	0.00655569	20.763103207481308	0.26407196508712893	0.796898	0.9577068342744185	-5.89855	20.798881104097177	20.792398320797183	20.782382977305733	20.817035879712854	20.804379994122172	20.771913608933005	20.661428448316073	20.697962934888267	20.72456920526578	20.775553933887473	20.729292781803956	20.801439300646024
Con_Pmod_vs_Con_Scr	A0A1B0GUL3	GSE1	0.0668953	7.927886750895431	0.9750089832531991	0.3517489809276265	0.8041966307442898	-5.47109	7.736464483045448	7.88251	7.883564436557685	7.9352	7.891968554566514	7.876050665809685	7.893578905517877	8.078805237399832	8.115489159304335	7.992617806124423	8.028903425428773	7.819484093750814
Con_Pmod_vs_Con_Scr	A0A1B0GVR8:P36578	CLN6:RPL4	-0.0468289	24.398172608650114	-1.20012	0.25679007481812466	0.7439648048457665	-5.24867	24.478660628650452	24.3606	24.356323745408215	24.362092889549174	24.32530926888245	24.36771481706819	24.486005881520168	24.39369460534055	24.46032841074052	24.395806550692303	24.34696615230437	24.44454895560657
Con_Pmod_vs_Con_Scr	A0A1B0GW23:Q03154	ABHD14A-ACY1:ACY1	-0.00372614	23.168475099435664	-0.0777546	0.9395030154172075	0.9873416866963577	-5.93094	23.110954218504425	23.122213844454382	23.222494747753895	23.198968167786237	23.088749428096317	23.15676678969486	23.121192195556095	23.28288482003637	23.13029109968333	23.211489436442285	23.21466448795903	23.161031957260743
Con_Pmod_vs_Con_Scr	A0A1B0GW91	TCF4	0.0472943	7.172737235764904	0.5120239492202925	0.6193603440725122	0.9084340539046494	-5.80195	7.030732625328289	7.139557634887419	7.304258708239955	7.405682189479678	7.087639432774535	7.123110353125263	7.138537466798065	7.324229945506833	7.126947463314121	7.089357501922362	7.110885671519559	7.191907836282768
Con_Pmod_vs_Con_Scr	A0A1B0GWE0	DOCK7	-0.00266841	13.83083591382335	-0.0435027	0.9661270057314937	0.989486	-5.93306	13.850498947215096	13.772793462808169	13.820982261431862	13.839004501623824	13.864008936623142	13.733256003762053	13.742813373445406	13.893546920981006	13.857851266462008	13.884935550202629	13.734474343880317	13.975865397444696
Con_Pmod_vs_Con_Scr	A0A1C7CYX9	DPYSL2	0.00445145	24.745068778131674	0.15979912068937557	0.8761088319783992	0.9742365054893409	-5.921	24.63475409167891	24.68445590175109	24.63890667893596	24.64466447131583	24.707513466973065	24.61929309822424	24.75024169852034	24.75820528748457	24.805474375439836	24.89541572855021	24.87929539756052	24.92260514114551
Con_Pmod_vs_Con_Scr	A0A1W2PP11:Q9H300	NA:PARL	0.0643597	20.4122	1.2306280205930804	0.24564273810717452	0.7435648622388488	-5.21585	20.574512569278266	20.523581279427543	20.513484317762646	20.517538130655584	20.612956963478112	20.674162230954057	20.179141253145684	20.20686946446442	20.228813668468284	20.359315390815997	20.374450994537344	20.181504476504053
Con_Pmod_vs_Con_Scr	A0A1W2PQ90:Q92878	NA:RAD50	0.19578727598759826	21.519150884802198	2.92176	0.0147128	0.45880751407315945	-2.83236	21.30128426626633	21.35379813089695	21.563453579167923	21.67041151158468	21.620083447531027	21.51540284517828	21.342432163981076	21.411224910652617	21.324417771189363	21.68961056052277	21.79100791655372	21.64668351410165
Con_Pmod_vs_Con_Scr	A0A1W2PQD6:Q9Y2D2	NA:SLC35A3	-0.0365365	21.854661459574647	-0.677589	0.5128640636991454	0.8634770288659539	-5.705	21.87180321685009	21.96430032247858	21.849562915488967	21.833054998148175	21.891086272257205	21.851915684034132	21.779888490981204	21.950394166056256	22.008185606745908	21.80406215009294	21.734	21.71768802517372
Con_Pmod_vs_Con_Scr	A0A1W2PS85:P28715	BIVM-ERCC5:ERCC5	0.0323113	18.71890120967564	0.918052	0.3794469931782737	0.822423	-5.52146	18.613939146806977	18.612946804281467	18.697906887038368	18.698151603535702	18.634691001825185	18.68888417707062	18.774528514975053	18.79246472536694	18.72171627908872	18.794709998082546	18.852125365242188	18.74475001279392
Con_Pmod_vs_Con_Scr	A0A286YES2:P0DJD1	RGPD1:RGPD2	-0.0538359	11.203911447566778	-1.1877	0.261439	0.7453392371742814	-5.26185	11.12443239417482	11.192864189547487	11.181563770909378	11.086404128025311	11.206070498044614	11.044878011353482	11.322796711285124	11.193495004688591	11.264487016640771	11.230819391216809	11.295041512423865	11.304084742491092
Con_Pmod_vs_Con_Scr	A0A286YEZ7:O14495	NA:PLPP3	-0.0545141	12.723066291150474	-1.49556	0.16456270630880146	0.701815	-4.90731	12.756390578694354	12.8017	12.721459060126117	12.735738296233809	12.677362651462325	12.702914167933782	12.814205605266809	12.777391439215968	12.77765102266218	12.607223314612696	12.582454463632043	12.722297113471592
Con_Pmod_vs_Con_Scr	A0A2R8Y4N5	DNAJC21	-0.00294043	15.780286838323093	-0.0958318	0.9254807134812411	0.9836035733427466	-5.92934	15.810855558892492	15.736936022028384	15.813364011990616	15.82250745521734	15.78425302601076	15.745573818773982	15.803146325907688	15.810868490857867	15.802778916093432	15.740322896454725	15.700782728128528	15.792052809521309
Con_Pmod_vs_Con_Scr	A0A2R8Y605:Q9C0C2	ABCC8:TNKS1BP1	0.020120564681338493	23.34193679725531	1.0111054877543704	0.3349737768189136	0.789192	-5.43788	23.41961700209306	23.390504462297717	23.44236960823056	23.44955282117094	23.429698453602384	23.433601491892013	23.219953778171536	23.250532568761493	23.21040168678775	23.289478586421257	23.284809332956357	23.28272177467866
Con_Pmod_vs_Con_Scr	A0A2R8Y623	RPS7	-0.0840502	15.69034580373647	-1.49075	0.1658015821722147	0.701815	-4.91327	15.580883358215049	15.502618901459517	15.688657618628897	15.558910217515855	15.560806259544368	15.400292755471176	15.678507567787864	15.742187162848223	15.6634	15.952944345910945	15.9165	16.03848613027724
Con_Pmod_vs_Con_Scr	A0A2R8Y6H1:O00400	NA:SLC33A1	0.017279299695776018	23.688621550696485	0.6879597587225821	0.5065731380233556	0.8605521265437722	-5.69811	23.76531274819457	23.76470792237193	23.727055701171775	23.7662	23.784968466825298	23.757790466700406	23.592753869660005	23.58246219002345	23.66950413539324	23.63041385245899	23.60890977119468	23.613424147063565
Con_Pmod_vs_Con_Scr	A0A2R8Y793	ACTB	0.0423869	16.761113914757914	1.382116016647115	0.19597684993915696	0.721058	-5.04434	16.803105251177932	16.76249059132736	16.74132331878954	16.790761479872398	16.769173080484464	16.87414528101212	16.727152845913476	16.740264890425525	16.67143878171821	16.760484830813677	16.742743210692993	16.750283414867255
Con_Pmod_vs_Con_Scr	A0A2R8Y7F4	PRRC2C	-0.0551182	13.017000133755557	-1.18451	0.262646	0.746457	-5.26522	13.144732441168935	13.054724061824007	12.979197324708473	13.00105523379414	12.979232667196843	13.033	13.04375742804532	12.93454897440055	13.035727672078982	12.999245737498487	12.93859182965102	13.060176796745829
Con_Pmod_vs_Con_Scr	A0A2R8YDH4:Q9UDY2	NA:TJP2	0.013210053705794422	17.397832278510602	0.1745459122681385	0.8647969224918478	0.971311	-5.91849	17.324291680883317	17.32803793852693	17.20961181542812	17.336285723453834	17.358776053359527	17.206509819142383	17.436464624636386	17.375130658719712	17.56041944383735	17.52675244439012	17.406751179361553	17.70495596038801
Con_Pmod_vs_Con_Scr	A0A2R8YDQ0:Q9H267	NA:VPS33B	-0.0477481	23.192744561640815	-2.40407	0.036236	0.5358613997467039	-3.62933	23.21557561824829	23.233489302335663	23.198757493403587	23.16995625675511	23.15176084625761	23.18286104394022	23.22091134453669	23.1827	23.183659866125204	23.178199646359364	23.18857224929929	23.206515143259544
Con_Pmod_vs_Con_Scr	A0A2R8YFL4:Q15813	NA:TBCE	0.0487056	22.032925934329725	1.173545391373657	0.26682352194734676	0.7470827452808014	-5.27676	22.018285223427657	22.01509975197593	22.074629651340345	22.1725	22.040861672017627	22.0407	21.94745199190206	22.036072716562593	21.99331819917201	22.014382826960656	21.96919042512504	22.072548860120975
Con_Pmod_vs_Con_Scr	A0A2R8YHD2	TPM4	-0.0297813	21.017637448550687	-0.390665	0.7039496376597691	0.9313927082650366	-5.85671	21.481804624560382	21.424433232170266	21.311445953443368	21.483875119978347	21.28984086407563	21.354623900593637	20.595081303017903	20.4885	20.726151194459316	20.68267328834978	20.577411407338353	20.795762319737875
Con_Pmod_vs_Con_Scr	A0A2U3TZJ3:Q9C035	NA:TRIM5	-0.404455	18.87002639318359	-4.27161	0.00150365	0.2768255225879832	-0.812029	19.225380443735403	19.276090669088752	18.978107501807024	18.66588329786198	18.61874005156848	18.98158887239294	19.10550809252485	19.04296013025398	19.033317209787224	18.530123286091925	18.53016567521737	18.45245148787316
Con_Pmod_vs_Con_Scr	A0A3B3IS24:O75688	NA:PPM1B	-0.00106504	17.40945400826969	-0.0187759	0.9853762300955387	0.9963390612660096	-5.93384	17.29098392643969	17.43836623101556	17.407553546245754	17.384836995640214	17.31097346659611	17.437898115677527	17.510025712165824	17.508700800231924	17.343333614714012	17.385474395094906	17.498650353657773	17.39665094175701
Con_Pmod_vs_Con_Scr	A0A3B3ISG8:Q16795	NA:NDUFA9	0.021584877640357547	24.529929707288428	0.7083434067411302	0.494345	0.8599001604693735	-5.68427	24.487152877932026	24.487512248356506	24.513061365626452	24.50995883840196	24.482260859548312	24.5603	24.592511975411018	24.634818609401673	24.56828187232986	24.52116622234271	24.54933169944779	24.45283849177703
Con_Pmod_vs_Con_Scr	A0A3B3ITS5:Q14181	NA:POLA2	0.25690130950994217	13.832291964664872	2.6082079977309984	0.025413497441115093	0.5067923048135473	-3.31708	13.775499356033109	13.689766523419788	13.79148229307624	13.851775870716244	14.310355585935568	13.865320644407152	13.797942200642687	13.800791850955704	13.877741325526651	13.761	13.71783316262995	13.748003200705266
Con_Pmod_vs_Con_Scr	A0A3B3ITS8:P49642	NA:PRIM1	-0.0605675	0.11105258037811172	-1.45792	0.1744706164619077	0.7095296467100889	-4.95355	0.0543354	0.0841056	0.0226563	0.0186079	-0.0582258	0.0190126	0.35444692462394123	0.2613001301702216	0.225894	0.0722158	0.0866289	0.19165360635525808
Con_Pmod_vs_Con_Scr	A0A3B3IUC1	NEDD4	0.0133694	18.12682391985341	0.25355624620216966	0.8047942503368581	0.9606279893198759	-5.90131	18.099115753792525	18.02013002644776	18.17088703133608	18.187242301972184	18.00156255105869	18.14143617489899	18.19581623064356	18.202497216932027	18.10159419253203	18.129687733096866	18.17524134169116	18.09667648383906
Con_Pmod_vs_Con_Scr	A0A494BZV2	MPRIP	0.00480223	24.12104547866281	0.26642725043122417	0.7951325090381661	0.9575475510121665	-5.89791	24.032370989454364	24.04295468098213	24.02765815981236	24.034813790450983	24.05824884833604	24.024327880607107	24.17028758998887	24.163633456045584	24.17881232772596	24.235170783338457	24.226392237673466	24.257874999538423
Con_Pmod_vs_Con_Scr	A0A494C039	HYOU1	-0.117516	20.5196	-1.91431	0.083553	0.6194593304401091	-4.35008	20.695385980288805	20.693149240089127	20.540215585821446	20.44344989297229	20.629	20.50375612253566	20.417783204105422	20.37912485555841	20.486358484462286	20.48734523501395	20.392407405986635	20.5671
Con_Pmod_vs_Con_Scr	A0A494C0A6:Q8IWB7	NA:WDFY1	0.00744656	20.998797938364305	0.36404	0.7231403297645358	0.9366504338432502	-5.86682	21.040939679865403	21.079234221866315	21.049774620843476	21.0645	21.066945508877737	21.060859294286953	20.919118881905025	20.96027669082459	20.975945891856576	20.93281922596213	20.925473750537005	20.909704087069052
Con_Pmod_vs_Con_Scr	A0A494C0G5	AGRN	0.015860634887946645	14.343113163224334	0.18802314371945708	0.8544865957155571	0.9700238487574436	-5.91601	14.15300687689995	14.26237323423586	14.292245045686704	14.164049632454011	14.240031189059284	14.351126239973064	14.454046785534548	14.526355753404134	14.33994543568649	14.458870454251327	14.611716252338391	14.263591059168254
Con_Pmod_vs_Con_Scr	A0A494C1T6:P31040	NA:SDHA	0.0292571	21.497287411754254	1.2551922706483778	0.23695427605652478	0.7398028321863026	-5.18899	21.52155667887819	21.487616240131043	21.52888689490304	21.537050517383538	21.55395493211937	21.534825588972016	21.42664264038531	21.421093791331263	21.46167261089964	21.513168777714988	21.52416467052213	21.456815597810504
Con_Pmod_vs_Con_Scr	A0A499FI48	PDIA4	-0.00941287	16.549991341823024	-0.189197	0.8535900577416805	0.9700238487574436	-5.91578	16.60932802182202	16.518419781248355	16.619983712994394	16.511658045237738	16.58121209261589	16.626622767061942	16.488300634021527	16.523359646152546	16.332165176611408	16.600768980347773	16.617853093303278	16.570224150459413
Con_Pmod_vs_Con_Scr	A0A590UJS4	NIPBL	0.028442178275730257	14.162804170587423	0.8698240314497863	0.4040788845177785	0.8296090302348127	-5.56211	14.07524381933655	14.092204977546412	14.155605425648616	14.118851962073364	14.151970854937378	14.137557940348024	14.254597756031313	14.234363710345187	14.177618147121304	14.172765750441926	14.243355506640034	14.13951419657896
Con_Pmod_vs_Con_Scr	A0A590UK28	GNAS	-0.0422961	14.14962671995582	-0.506835	0.6228722758045175	0.9092250255657002	-5.80458	13.988414500024057	14.122890097100806	14.134853403917806	13.911810994776644	14.099414785004017	14.108044008588916	14.283907576716926	14.432596838165273	14.206303530623329	14.18922752787652	14.300067132156746	14.01799024451882
Con_Pmod_vs_Con_Scr	A0A590UK80:Q13247	NA:SRSF6	0.00454754	16.001565265982272	0.2346803913054112	0.8190253882432985	0.9638957433534364	-5.90598	16.011655920552784	15.96439203812485	15.982464869602186	15.98035064204688	15.990178423689908	16.00162637281588	16.02620424563811	15.993548191986354	16.01399771950169	16.02394110623409	16.025144322811997	16.005279338782536
Con_Pmod_vs_Con_Scr	A0A5F9ZHJ0	ACAT1	0.0664244	14.546261549022205	0.949427	0.3640032146636514	0.8123235581476965	-5.49402	14.578284161123884	14.58067239743022	14.770766326850309	14.779224589428717	14.665074440600042	14.684697098651116	14.317733174763056	14.568275195600428	14.34186270435477	14.44426992258654	14.44147465910226	14.38280391777511
Con_Pmod_vs_Con_Scr	A0A6Q8PF18:Q9C040	NA:TRIM2	-0.0142413	19.810224700987376	-0.391962	0.7030200015819364	0.9313927082650366	-5.8562	19.760742735509645	19.787184822215217	19.76054689404109	19.7162	19.72614068657318	19.82343874166379	19.90635453640662	19.91848998740415	19.80725751186648	19.83550502360271	19.87121595578415	19.809648284752377
Con_Pmod_vs_Con_Scr	A0A6Q8PFP0:Q9NQ88	NA:TIGAR	-0.0207483	25.280904053674114	-0.696214	0.5015991573244576	0.8605521265437722	-5.69255	25.29218362434029	25.33102634664301	25.34557288445158	25.332773163635053	25.295414296080384	25.278350613023747	25.243052736693045	25.299877323494844	25.219842899229818	25.22690185607197	25.21282538969699	25.293027510728617
Con_Pmod_vs_Con_Scr	A0A6Q8PGI1	CALD1	-0.0889406	22.44789532833922	-0.912682	0.38213597341423333	0.822423	-5.52607	22.829747911228644	22.83763867577857	22.581245521350873	22.582790280923987	22.78721634568393	22.611803676235063	21.95329896864906	21.87655713914817	22.193457318815504	22.40147824469004	22.256702905012276	22.46280695255454
Con_Pmod_vs_Con_Scr	A0A7I2RJN6	CASK	0.024696969308052985	21.099854786017065	0.5151434375128611	0.6172538679099664	0.9078100942518171	-5.80036	20.983814010597342	21.103052538652783	21.132770015825297	21.08643985574443	21.10347329303282	21.103814324222338	21.08939757657567	21.21105604076354	21.049114141215217	21.105239859177633	21.16585704650748	21.064228729890225
Con_Pmod_vs_Con_Scr	A0A7I2V2H3:P25787	NA:PSMA2	-0.010861	21.098603582677384	-0.584788	0.5711926795311816	0.889484	-5.76244	21.07944799262257	21.113729894081143	21.093271493476077	21.08123939629002	21.090242895635615	21.082384156078476	21.08385969143505	21.10835921544335	21.1196	21.116258633364353	21.120068294820204	21.094798572452166
Con_Pmod_vs_Con_Scr	A0A7I2V383:Q86U42	BCL2L2-PABPN1:PABPN1	0.0181802	15.46727333458979	0.5615482321730225	0.5863530994119448	0.8961673552921169	-5.77559	15.377596224570148	15.405506577267383	15.475150362463111	15.459776347878764	15.419569659188175	15.43344765403742	15.526086960580624	15.577154702321252	15.520144750311871	15.473109750729826	15.518689363193026	15.421047662535877
Con_Pmod_vs_Con_Scr	A0A7I2V598	PABPC4	0.0647198	11.908770054180192	0.7219075125620517	0.4863091474211869	0.8544236236283507	-5.67487	11.918398145460484	11.973060072749302	11.911179375677769	12.19953559225565	11.830058809783786	11.967202597236495	11.77312602987564	11.93987825430875	12.0268	11.812289045024102	11.68962200867952	11.864104318722305
Con_Pmod_vs_Con_Scr	A0A7I2V5R6	GNAS	0.14110418200149155	13.251115671234517	2.172170971314355	0.0540254	0.5657453488710619	-3.97712	13.126622839297822	13.168048521549444	13.34809052138732	13.381332550191573	13.452622261512436	13.23211961653506	13.094301199872572	13.061798890493955	13.080521499109086	13.325139838624734	13.43036056319066	13.312429753049551
Con_Pmod_vs_Con_Scr	A0A7I2YQN2	SYNCRIP	-0.0324239	16.048339446617806	-1.29832	0.22230447578031573	0.7354576507643895	-5.14092	16.040724172701925	16.0126	16.013190152618154	15.964300676910234	16.016516771033302	15.988473978505258	16.10422400484075	16.026507155201646	16.090423575641562	16.106015690058634	16.127151744699045	16.08989664160676
Con_Pmod_vs_Con_Scr	A0A7P0T8K8:Q9NS56	NA:TOPORS	-0.039947	17.145564168488775	-0.662631	0.5220201345244226	0.867079	-5.71479	17.002180692766846	17.176189130760122	17.16746353372327	17.103552352588743	17.022639209029734	17.099800922111566	17.122781805483243	17.306509298533125	17.08886906300235	17.208236523456158	17.254782769399426	17.193764721010716
Con_Pmod_vs_Con_Scr	A0A7P0T9U7	SF1	0.00170308	17.150475160582054	0.0935273	0.9272668984595309	0.984637	-5.92956	17.150699693131898	17.115624250703558	17.13372042477523	17.12831683747184	17.1374	17.13946345089966	17.176596654398516	17.146418437053285	17.17002662929344	17.17309135469268	17.1786	17.155754896456166
Con_Pmod_vs_Con_Scr	A0A7P0TAR2:O43674	NA:NDUFB5	0.024147611252814727	21.88776993176885	0.9706458994076387	0.3538174735922338	0.8047054395516463	-5.47503	21.91026527019278	21.90577341379848	21.88605087258703	21.90690216158695	21.91881489703742	21.948815331712357	21.86340745600627	21.861519514585375	21.90362254574808	21.868887545541877	21.87816225459741	21.80101791783217
Con_Pmod_vs_Con_Scr	A0A804CD06	PTPA	-0.00705132	21.32108762250104	-0.241756	0.8136828118306003	0.9629302250525247	-5.90427	21.229214470666104	21.275188896406085	21.247505695768503	21.226683287315833	21.25686070217473	21.247211109580633	21.355827446034706	21.440918412330017	21.445741077575324	21.401870035184036	21.393681596181203	21.33234874079532
Con_Pmod_vs_Con_Scr	A0A804HIE8	DOCK9	0.0398958	17.761748432083923	0.6423887300443674	0.5345630181935157	0.8749702499707683	-5.7277	17.530608879878514	17.57479813515844	17.706851301432437	17.64652291572705	17.617872107323436	17.667550763930162	17.912606153069902	18.022175905840825	17.782567595033935	17.88240737093264	17.966734379619925	17.830285677059827
Con_Pmod_vs_Con_Scr	A0A8C8KGQ8	UBAP2	0.077078	17.2503	2.550461736904054	0.0281015	0.5084436347853483	-3.40582	17.192682462329884	17.206725983280933	17.262780862778932	17.326717390352172	17.298795751417586	17.267910295243595	17.123603120850774	17.22573704420283	17.193956516576264	17.317038655895193	17.304588617083212	17.28339994269661
Con_Pmod_vs_Con_Scr	A0A8I5KQ21	KRAS	-0.101646	15.036839327095205	-2.47065	0.0322838	0.527323	-3.52797	15.125170214136302	15.03295387700828	15.137500011058105	15.009538785011824	14.954254311472658	15.026894412224822	15.065968012312764	15.052336225266764	15.069161123711307	15.016308904508165	15.053442332335871	14.898543716095595
Con_Pmod_vs_Con_Scr	A0A8I5KQW5	SH3PXD2A	0.031382	15.665589083942466	0.4585779673538251	0.6559971412366965	0.9205707524978176	-5.82781	15.3731	15.542835748275332	15.615843452130806	15.619925109995576	15.46628693173288	15.5397	15.85368430765358	15.936498380000542	15.770772088420502	15.720779586896954	15.847062098697688	15.700559660088729
Con_Pmod_vs_Con_Scr	A0A8I5KRC6	MACROH2A1	0.021740523809683054	13.413497410010695	0.20231789596626304	0.8435820484253107	0.9689646436341244	-5.91317	13.48488535312305	13.492227336742404	13.644999261245175	13.506682839548748	13.489266402453756	13.691384280537186	13.320554319626543	13.413046405797644	13.20502776128084	13.2789	13.452296499976915	12.982669313585486
Con_Pmod_vs_Con_Scr	A0A8I5KT56	FMR1	-0.00301152	19.107913653498997	-0.0857749	0.9332787842557413	0.9854296731349035	-5.93027	19.05239518744204	19.044249118401385	19.10232392801358	19.05903057968433	19.03005428935352	19.100848818272624	19.198461096902427	19.184044115299788	19.093520928846353	19.13425978793014	19.194716506240315	19.101059485601464
Con_Pmod_vs_Con_Scr	A0A8I5KT88	PDIA3	0.11930395101961366	11.356057210401943	0.7729886162366936	0.4567849599699034	0.8479055457704144	-5.63801	11.268384773897791	11.296928509855077	11.465091641567872	11.698797792925468	11.308898700404884	11.380620285049233	11.28089635612962	11.90530165477774	11.527031422030024	11.096816313082243	10.853767010998556	11.1902
Con_Pmod_vs_Con_Scr	A0A8I5KTQ1	MYLK	-0.00420784	21.963181615075023	-0.0691407	0.9461926072612258	0.9877182362068813	-5.93158	21.545344597113168	21.565217178711723	21.666533518952857	21.563954031116687	21.56323069850369	21.63728703033047	22.32005140860084	22.335556508216182	22.238058349482753	22.38300967681089	22.504619662523982	22.235316720537032
Con_Pmod_vs_Con_Scr	A0A8I5KUE3	PLEC	-0.0700793	16.11677160674437	-1.2004	0.2566838865154133	0.7439648048457665	-5.24836	16.195850258362018	16.27594586099715	16.107617957180082	16.10401468122279	16.159591040886507	16.10557046699356	16.03561044723909	16.1703	16.20052810247325	16.038526664956002	15.911843610675731	16.09590796635445
Con_Pmod_vs_Con_Scr	A0A8I5KX85	CDV3	0.0220379	19.32681890695271	0.2818270895648414	0.7836199290216079	0.9552746233869726	-5.89364	19.21803872848392	19.323028611594253	19.40668901359524	19.51432018097287	19.309024154453866	19.19052584977066	19.4274	19.51860120507804	19.55552269628146	19.1188	19.10118046186519	19.2387
Con_Pmod_vs_Con_Scr	A0A8I5QJ94	FKBP15	0.10705323639090203	7.982775604264673	1.9386762705892289	0.0802193	0.6146169983214856	-4.31563	8.003487000738971	7.957234261298502	7.974449228062109	8.00942	8.132604974114777	8.114301322545465	7.944466458017909	8.125174757967986	7.905646876141942	7.900024044059921	7.810954545586379	7.91554
Con_Pmod_vs_Con_Scr	A0A8J8YYJ1	SET	0.2074114852887714	9.922041268629046	3.410337103637845	0.00632022	0.3806156950898239	-2.08004	9.833135263141394	9.775950209095154	9.821612444796546	9.910362157687585	10.13761671696065	10.004953498251162	9.78114	9.928285796227623	9.920447100050763	10.051127263233004	10.002043394742312	9.897823973580255
Con_Pmod_vs_Con_Scr	A0A8Q3WKK6:A0A0J9YXC7:P0CW20	LIMS1:LIMS3:LIMS4	-0.0350926	22.469893929117124	-0.817848	0.43183264545973954	0.8383377081920187	-5.60382	22.5089	22.485764694159272	22.486411009541506	22.39011117796336	22.464262610298206	22.52147012414185	22.462006688215705	22.41538084851675	22.40804486043868	22.514863442493592	22.57389587884641	22.40756969656327
Con_Pmod_vs_Con_Scr	A0A8V8TLD8:O75152:A0A1B0GTU1:P0DQW0	LOC441155:ZC3H11A:ZC3H11B:ZC3H11C	-0.0146707	17.228427727989327	-0.823683	0.4286544666153065	0.8364053969144124	-5.59925	17.22376763847066	17.250918426297318	17.24264817634316	17.223788733064943	17.216407045604118	17.233126476849733	17.23231123500522	17.221974910793644	17.207854038852766	17.22228901946992	17.24615033241954	17.219896702700893
Con_Pmod_vs_Con_Scr	A0A8V8TLX7	LRRFIP1	-0.0925665	16.38034551645807	-2.42255	0.0350937	0.5355652685038457	-3.60124	16.612396578859855	16.692332933559516	16.63275497321093	16.491358109735312	16.580646343354555	16.58778058171219	16.156536811982143	16.274526949686432	16.16673440257388	16.13962467749625	16.13524940960828	16.094204425717507
Con_Pmod_vs_Con_Scr	A0A8V8TMC7	SORBS2	-0.0059014	17.797020946316746	-0.128822	0.8999624733934326	0.9782499901891617	-5.92556	17.258490534579447	17.4098	17.396061874159283	17.32998914196544	17.37188990024208	17.344770560612293	18.295446563798855	18.276729509083157	18.230042598071527	18.187624039551515	18.304131278765432	18.159273963003617
Con_Pmod_vs_Con_Scr	A0A8V8TNP6	FXR1	0.011985580625761827	18.77532479634241	0.5256538435391952	0.6101832742919482	0.9052499887378135	-5.79493	18.751342608211075	18.74234253927816	18.788509049124993	18.791060141418296	18.78495101326801	18.742139783805204	18.748485089663237	18.798658435627985	18.798	18.795305389679974	18.781382672231096	18.78167800167657
Con_Pmod_vs_Con_Scr	A0A8V8TPU9	PKP2	-0.0291889	16.05363820029505	-0.286505	0.7801337986038173	0.9552746233869726	-5.89229	16.29049491243945	16.57787164076338	16.264998030082527	16.275011081357164	16.518024933231228	16.252761991591942	15.64131081808929	15.775760107218828	15.899990098687478	15.716130643448276	15.614092138677268	15.817212007953795
Con_Pmod_vs_Con_Scr	A0A8V8TR85:Q6AI08	CAMTA1:HEATR6	-0.0845603	13.911105303793292	-1.70257	0.11838510005672989	0.6665809340429043	-4.64086	13.993414252818312	14.03003906127553	13.856973152711866	13.816603424679034	13.892734905727083	13.917407207837709	13.962654289429924	13.837758529653511	13.9066	13.885038756958918	13.87215566832121	13.9619
Con_Pmod_vs_Con_Scr	A0A8V8TRD7	OS9	0.0275948	19.893352179015512	1.0932895066306212	0.2990102010224478	0.7710782591243684	-5.35869	19.854366644276368	19.87373780443966	19.91160805361866	19.92439429692994	19.89566318015466	19.90243947941714	19.889324119158942	19.936493687268072	19.84897764584249	19.88433400267419	19.892726147015388	19.906161087390625
Con_Pmod_vs_Con_Scr	A0A8V8TRF6	CLASP1	0.012602736539633952	20.5265	0.6926514525266727	0.5037424416121105	0.8605521265437722	-5.69496	20.523929597641068	20.521823393857577	20.539351906924654	20.52753424864436	20.55222850722892	20.543150352168915	20.505694890696137	20.53713769286766	20.507293706559864	20.52674649472817	20.527901007428785	20.5047
Con_Pmod_vs_Con_Scr	A0A994J3S8	GLS	-0.0475717	19.376409400407606	-0.780542	0.4525191188168959	0.8478026178624848	-5.63237	19.415933490958977	19.337806890264694	19.50065133000103	19.389490679377772	19.290500374899164	19.43168558707698	19.4058	19.402462618624853	19.25090835386128	19.362933525138494	19.449989038610912	19.278711025098907
Con_Pmod_vs_Con_Scr	A0A994J420:Q2TAL8	NA:QRICH1	-0.0337259	20.723894665689507	-0.633086	0.5403859030200728	0.8772017740805292	-5.73352	20.72998394640735	20.65695986324058	20.648739135897724	20.61996386921838	20.587316189963765	20.727225099393895	20.923405747284065	20.742743098845736	20.72705642147152	20.747147171916893	20.808326187808767	20.767869256825385
Con_Pmod_vs_Con_Scr	A0A994J434	HMGA1	0.053954246951866125	14.037810630831117	1.3173141151236827	0.21609401644881734	0.7328496892578961	-5.11939	13.878981133637057	13.815068976923516	13.944592199787422	13.96033466310964	13.894586045042477	13.94558434305148	14.225419485043416	14.173061480901977	14.143479839878632	14.152214718888564	14.2241	14.096337667985132
Con_Pmod_vs_Con_Scr	A0A994J4E9	HNRNPK	-0.124999	14.519079675925164	-3.06746	0.01142	0.41008039917888317	-2.60687	14.691746292680094	14.5638	14.577722225953131	14.465367100625606	14.44245428886471	14.550431769051311	14.54039107917091	14.54800662235537	14.475653575091194	14.475246091086738	14.415912181602296	14.482244498668017
Con_Pmod_vs_Con_Scr	A0A994J4Y8	PGAM5	0.0298912	20.41960242688329	1.488112068423807	0.16648339218347455	0.701815	-4.91652	20.456200744495117	20.39887753047765	20.458578382994943	20.468034724625884	20.47519137425577	20.46010403624707	20.365508680014383	20.373135921582072	20.36308184848747	20.413808942423746	20.405513162002748	20.397193774992648
Con_Pmod_vs_Con_Scr	A0A994J508	VASP	-0.035021	19.33146386483201	-0.94373	0.36677310627419357	0.8135674120195892	-5.49906	19.29803520839782	19.237742192531524	19.18724348890078	19.15859549898025	19.245791112001232	19.21357138238793	19.402639081254748	19.33847706977856	19.4572	19.49967828933853	19.466663340678092	19.47189140599236
Con_Pmod_vs_Con_Scr	A0A994J509	MBNL2	-0.0104769	13.262783955463513	-0.126221	0.9019707568702904	0.9784162001402956	-5.92589	13.1035	13.240318857373502	13.264594771387438	13.23050825999875	13.085531679094718	13.260972503113054	13.48328876257886	13.375892863029316	13.159191175228544	13.232164491886646	13.411877640904462	13.305537043877573
Con_Pmod_vs_Con_Scr	A0A994J514:P61586	NA:RHOA	-0.126672	17.744972773600512	-2.23603	0.048424209110610315	0.5482422400898715	-3.8823	17.937705613300736	17.720653803061484	17.732658271781688	17.625558575591512	17.653096345134635	17.732345542142774	17.728142707648516	17.681125245620873	17.784690533098402	17.83851550922184	17.756266330546516	17.748914806057172
Con_Pmod_vs_Con_Scr	A0A994J5E0	PDE4DIP	0.00278621	20.87082820415203	0.13444789752362296	0.8956219085064683	0.9771853590929308	-5.9248	20.844906296303773	20.83098098530769	20.801234406388033	20.80120657790832	20.849898570530943	20.834375184343344	20.936122124393407	20.943658761206617	20.964805839222436	20.892831428049387	20.86758923011942	20.88232904605097
Con_Pmod_vs_Con_Scr	A0A994J705	HMGA1	0.025064396648363463	1.2289895702135045	0.1407464107416413	0.8907665535287566	0.9763925020716006	-5.92392	1.1007738909316167	0.8494118380806164	1.1013694617352847	1.2364759006475232	0.8792407270650955	1.0110317529799886	1.4025903929635888	1.9242345665869145	1.387026780555466	1.3115812655426602	0.9604992588566824	1.5836390066166182
Con_Pmod_vs_Con_Scr	A0A994J749:P12268	IMPDH:IMPDH2	0.013911966789926566	22.673995624003627	0.5733059653534216	0.5786561599459927	0.8914941055722663	-5.769	22.67464162501483	22.71077672662968	22.72752072761135	22.759388064884924	22.68995053053276	22.70533638420795	22.645366870816915	22.69176703069111	22.6827	22.601228988258708	22.608173827719824	22.59114504970609
Con_Pmod_vs_Con_Scr	A0A994J782	HNRNPK	-0.0316378	10.718001909345709	-0.357047	0.7282148852478374	0.9372527604391676	-5.86936	10.597999503542962	10.725445659942322	10.90857340749328	10.780804907303896	10.744765008217817	10.61153521333382	10.527121812888364	10.655935648650496	10.663327332465858	10.812643240797566	10.938589479712917	10.649281697799209
Con_Pmod_vs_Con_Scr	A0A994J7X3	VASP	-0.00264186	19.25823186333276	-0.097347	0.924307	0.9828031530205685	-5.92919	19.282518231072302	19.27697880255977	19.313	19.321733586704696	19.242207624969637	19.30061776394619	19.23826148420289	19.214462567355493	19.161456442891694	19.230384918702047	19.25695489784165	19.260218506035535
Con_Pmod_vs_Con_Scr	A0A9L9PXJ4	MYL10	-0.0599423	17.455401878752582	-0.496256	0.6300623672058713	0.9097110057858723	-5.80986	17.666177928499174	17.449423842588516	17.41063872910894	17.251166854759063	17.447893721823547	17.647352900497133	17.490183264402706	17.17650104940384	17.045704193015716	17.596915466004795	17.66591531206479	17.616949282862777
Con_Pmod_vs_Con_Scr	A0A9L9PYL0	MFF	-0.04289	22.3682	-0.928974	0.3740187898074038	0.819644	-5.51199	22.49731281582621	22.55653096968158	22.41928313979737	22.466123591259404	22.458799033726468	22.419534173621223	22.302059386775635	22.28131457649332	22.4186	22.19806094202346	22.138182506278824	22.262991823265224
Con_Pmod_vs_Con_Scr	A0AAG2SUK6	NA	0.0592874	17.255533640515406	1.3913599259298304	0.193239	0.721058	-5.03344	16.754362219461786	16.804144775645383	16.91200167782863	16.944460857007556	16.86131242087888	16.842597558602595	17.639214766082596	17.664314913691108	17.62124801417557	17.656934883499318	17.72932332447932	17.63648827483211
Con_Pmod_vs_Con_Scr	A0AAG2TTP8:P62241	LOC102723573:RPS8	-0.0460272	22.626044932415493	-1.35425	0.2044274470247152	0.7238213410594051	-5.07691	22.69667171132656	22.619865579039335	22.59206112500317	22.588830121492997	22.580149749183015	22.601536936456835	22.655884192821283	22.55118120706218	22.64880212221377	22.65840893156779	22.63374877659163	22.685398736227334
Con_Pmod_vs_Con_Scr	A0AAG2TVC3:Q6VEQ5:C4AMC7:A8MWX3:A8K0Z3	NA:WASH2P:WASH3P:WASH4P:WASHC1	0.0604852	20.458053564017135	2.324505956811102	0.0415814	0.5358613997467039	-3.74967	20.362786533877053	20.38648610443852	20.442938796439098	20.496675231842072	20.45210871567657	20.424882995290098	20.433163902918785	20.464568010348835	20.432989494975356	20.52290593742443	20.540261177283877	20.536875867690934
Con_Pmod_vs_Con_Scr	A0AAG2UY03	TGOLN2	-0.0330675	18.330331739238662	-0.402382	0.6955712771939714	0.9283859171858714	-5.85204	18.4462	18.412610512196604	18.237940012987796	18.268903939055853	18.43623829651374	18.292431172590643	18.381210872461157	18.15118233070822	18.414545912021605	18.28484552371858	18.223910257285752	18.4139
Con_Pmod_vs_Con_Scr	A0AAQ5BI61	EPS15L1	-0.0320987	22.562741207065724	-1.57798	0.14455802904205975	0.694261	-4.8036	22.49911102196076	22.520028944164014	22.531452322136648	22.484411580310024	22.47997990942834	22.48990457848686	22.62529223775909	22.599289075626658	22.59369909758088	22.634993777244695	22.674703029547093	22.620028910543628
Con_Pmod_vs_Con_Scr	A0AVT1	UBA6	-0.0274762	25.334704968800683	-1.17166	0.26754638587530344	0.7470827452808014	-5.27873	25.337368472607583	25.365663125820745	25.367036287118896	25.33897473424585	25.29506650872967	25.353598001613435	25.351665616573516	25.380229907759773	25.342793280172955	25.298083359796703	25.32189710534287	25.264083225826212
Con_Pmod_vs_Con_Scr	A0JNW5	BLTP3B	0.017812824884966716	19.900122657533277	0.753552	0.46788087117816946	0.8479055457704144	-5.6523	19.881838885471097	19.832706180746012	19.871604288892826	19.918789189674683	19.83874988651051	19.882048753579657	19.942027414607708	19.95726036375338	19.959278879615542	19.913725468733514	19.89223288845959	19.9112
Con_Pmod_vs_Con_Scr	A0MZ66	SHTN1	-0.0385592	24.86929303374256	-0.78201	0.4516928609261771	0.8476507422042263	-5.63127	24.8631	24.76167955248816	24.86527417531429	24.76286018840201	24.74437676722499	24.867128681842814	24.97714993728777	25.013523938235025	24.87157471404069	24.92293164189031	24.94934258361847	24.832584722349416
Con_Pmod_vs_Con_Scr	A0PJW6	TMEM223	-0.0430155	17.01455994953625	-1.06266	0.312055	0.7758083695949878	-5.38878	17.19229659447291	17.03728254142267	17.06300841104212	17.000731851340664	17.07104880786085	17.09176053111024	16.959977656400916	16.898455706675115	16.90644245373664	17.001711021630367	16.956358234193782	16.995645584548704
Con_Pmod_vs_Con_Scr	A0PK00	TMEM120B	0.11639447652682122	20.788973470370248	3.738044485941564	0.00362385	0.352953	-1.58614	20.67058006478445	20.668696825983805	20.72307573033612	20.804788100529695	20.796925782368135	20.8098	20.81372338569179	20.891263261930177	20.86077218943248	20.83420188897291	20.84902198220553	20.74481026442087
Con_Pmod_vs_Con_Scr	A1A4S6:A6NI28	ARHGAP10:ARHGAP42	-0.0398087	13.986558471376153	-1.30453	0.2202570552840106	0.7354576507643895	-5.1339	13.986302491577025	13.996918086495524	13.937265804252544	13.946122165892426	13.935099261708343	13.919838953324428	14.042184891147864	13.951132259446414	14.037864288132983	14.008950487514191	14.00267471948315	14.074348247538948
Con_Pmod_vs_Con_Scr	A1L0T0	ILVBL	0.013547849196257289	24.861664044979182	0.5183322763347065	0.6151042992135619	0.9071471488695353	-5.79872	24.82502376687797	24.818172628304065	24.769993726644714	24.83162486958188	24.80956998849021	24.81263881134341	24.994523735442733	24.997989623893275	25.041	24.81687595676463	24.76945400993984	24.853055134778845
Con_Pmod_vs_Con_Scr	A1L390	PLEKHG3	0.0829804	13.381202311489544	0.7740653728564275	0.4561752743073654	0.8479055457704144	-5.63721	13.3612	13.492839401606082	13.607800750651606	13.542206744050947	13.48655171614875	13.682004934004029	13.219542424511026	13.351206234558267	12.991582593313291	13.268553852565011	13.455704640175668	13.115252337034544
Con_Pmod_vs_Con_Scr	A1X283	SH3PXD2B	0.0441472	20.01026898485694	2.35975	0.0391249	0.5358613997467039	-3.69647	19.94487566207085	19.926405177536218	19.942802546995736	20.00119018745523	19.973518453610534	19.971816380802487	20.02977006830598	19.990952420343262	20.017062482020204	20.0999	20.104666855201877	20.120305755420873
Con_Pmod_vs_Con_Scr	A1Z1Q3	MACROD2	0.00283049	17.468574679813266	0.10300914965370903	0.9199204044567586	0.9825557355102871	-5.92861	17.465948608089136	17.496889834216542	17.479874629740156	17.430430488156478	17.54288332525481	17.47789071825987	17.489723321229263	17.47141858205912	17.472352605446734	17.428650638187847	17.45554663226748	17.411286774851767
Con_Pmod_vs_Con_Scr	A2A376:A0A7P0TB70:O95786	DDX58:NA:RIGI	0.017364117921562894	24.53778224727302	0.3500657309565708	0.7332947543044992	0.938396	-5.87185	24.507929468230184	24.635741098926193	24.590303311670784	24.568443499860884	24.70860096255803	24.509021770172925	24.374184399180983	24.435533376462622	24.453875907629644	24.543177370063276	24.536451355133124	24.590124447387627
Con_Pmod_vs_Con_Scr	A2AJT9	BCLAF3	0.059719	15.975946719659426	1.0343954989843687	0.3244688856881749	0.7835542816275385	-5.41594	15.83913419789843	15.92823471957144	15.999607036293074	15.957001161075032	15.975966611493492	16.013165134853267	16.00116259704289	16.080121699638504	15.898541079770611	15.997976278158896	16.102225139518378	15.9182
Con_Pmod_vs_Con_Scr	A2RRP1	NBAS	0.015850916624032152	25.03518837815301	0.9299491602106197	0.3735368587358453	0.819644	-5.51114	25.0635	25.070404410365363	25.06855341835198	25.080239458008293	25.094746015292213	25.075010462730244	24.992021079920175	24.974876275426137	25.003806649311237	24.999234397897037	25.009345875524033	24.99053713756812
Con_Pmod_vs_Con_Scr	A2RU37	LINC02872	-0.0497516	21.020134735395853	-0.754456	0.4673608466857675	0.8479055457704144	-5.65164	21.15920762562826	21.014639628149016	20.96226347810928	20.90383142406766	21.088544268531383	20.99448025272174	20.982227035264636	20.884719392341903	21.098561957663875	21.096673863470716	21.0234	21.033095587443587
Con_Pmod_vs_Con_Scr	A3KMH1	VWA8	-0.0484295	23.97786765180631	-1.43115	0.18182179045205382	0.7137532972740651	-4.98596	23.98901841277132	23.967734561633964	24.003794599416608	23.92843325318116	23.896564314582847	23.990261403577364	24.02662260408519	24.028628844717986	23.92233850308744	23.989375214209755	24.02332777850075	23.96831233191135
Con_Pmod_vs_Con_Scr	A3KN83	SBNO1	-0.0350578	16.623152731356747	-0.691417	0.5044862328634591	0.8605521265437722	-5.69579	16.578511341228058	16.711549324734293	16.584087765223163	16.47877613948271	16.681546913965246	16.608651933218297	16.614575808676708	16.65902170419712	16.63899431232259	16.64878907725066	16.674060576327562	16.599267879654533
Con_Pmod_vs_Con_Scr	A4D1E9	GTPBP10	-0.0179634	18.571906239319304	-0.770264	0.4583298884294268	0.8479055457704144	-5.64003	18.58069131553401	18.54070597255296	18.590695306140287	18.571548994938443	18.516283035198526	18.57037043831304	18.573498067813865	18.589363595532443	18.56464269087363	18.598134318178857	18.604991422465076	18.561949714290517
Con_Pmod_vs_Con_Scr	A4D1P6	WDR91	0.0543627	18.535382026113325	0.9729982591127527	0.3527011484252861	0.8047054395516463	-5.47291	18.522392520150568	18.464818517491302	18.58802360503431	18.66152714082029	18.460814039259716	18.61598155841697	18.47449130952889	18.57886110425045	18.51389689017636	18.54763229984304	18.561073544979575	18.435071783408432
Con_Pmod_vs_Con_Scr	A4FU01	MTMR11	0.23850018113303761	19.235135031164027	1.5221057101152824	0.15787168976854057	0.6987405136268369	-4.87428	19.72214543485228	19.860961469286547	19.750296506238794	20.06070023706907	20.22052384562644	19.76767987108122	18.008806670529147	18.415410543642412	18.630642529098523	18.873361284677262	18.592288819353104	18.91880316251354
Con_Pmod_vs_Con_Scr	A5D8V6	VPS37C	-0.0395327	19.556575869014935	-0.775132	0.45557184842761733	0.8479055457704144	-5.63642	19.588796799607675	19.68413705109021	19.633725120263083	19.5369	19.61939045485168	19.631772648831344	19.473032477583633	19.66222001553367	19.565760079914813	19.470180063800097	19.46266330430043	19.350334630252583
Con_Pmod_vs_Con_Scr	A5D8V7:Q15050	ODAD3:RRS1	0.017019878499841212	21.380472581043534	0.4812390618449562	0.6403389966739468	0.9143713518115782	-5.81718	21.333406469258502	21.35200108799406	21.42003650648247	21.445920489854043	21.35993542941228	21.35064777996822	21.389136496178928	21.479573934889636	21.40001754517593	21.33799101336484	21.32456277337471	21.372441446568786
Con_Pmod_vs_Con_Scr	A5PLL7	PEDS1	-0.111265	18.657826820593613	-1.72517	0.11412047230914109	0.665079	-4.61063	18.910240035046368	18.85792808863783	18.710935701992216	18.615992049709277	18.779293715348143	18.75002290876591	18.413952718030853	18.425251938451396	18.587384523533903	18.67568903236403	18.580108304304304	18.587122830939137
Con_Pmod_vs_Con_Scr	A5PLN9	TRAPPC13	0.032796712442912934	20.045485020779424	0.8632577237581296	0.4075161069080687	0.8307738740093096	-5.5675	19.97618327681553	20.045911671784857	20.07808134033412	20.11519615831347	20.04416094197569	20.039209325974095	20.012599582830543	20.14095572703022	20.102089892877437	20.0099	20.010980203497898	19.97052586437852
Con_Pmod_vs_Con_Scr	A5YKK6	CNOT1	0.00218689	21.769822611762056	0.0914412	0.9288842160797073	0.9850749730305646	-5.92976	21.738333627983565	21.765385297846553	21.771745665373448	21.750730340183704	21.74546081099257	21.785834117498684	21.79193525956401	21.80598947213571	21.746462527634932	21.775446947982015	21.809159707218065	21.751387566731424
Con_Pmod_vs_Con_Scr	A5YM69:Q12774:A0A2R8YFR7:A0A5F9ZGZ6	ARHGEF35:ARHGEF5:LOC107987545:NA	-0.0400493	22.23595008279942	-0.988462	0.3454265966557166	0.7978482743530775	-5.45883	22.301968687958805	22.174791642767335	22.28213099310832	22.197423295693135	22.18081173362335	22.26050844319601	22.26223722733228	22.218821305119963	22.155636783220903	22.27410866837889	22.30086020105405	22.22210201214001
Con_Pmod_vs_Con_Scr	A6ND36	FAM83G	0.19666664635643727	18.66572675782743	3.1466248469270783	0.00995522	0.40001201681270493	-2.48462	18.640633037490392	18.525527443988377	18.497441169767736	18.76199995317068	18.741017011478096	18.750584625667024	18.63301401664367	18.751594990720708	18.89598834190262	18.677326778965295	18.53469589908738	18.578897825047147
Con_Pmod_vs_Con_Scr	A6ND91	ASPDH	0.2606871109749491	11.636397643239283	1.9287204725842266	0.0815662	0.6172652585894477	-4.32973	11.280783546893844	11.596283410882007	11.682611288987234	11.91092466812983	11.833507618556432	11.597307293001675	11.50175789357106	11.790309388109945	11.923436483323613	11.54329796921985	11.634382478982408	11.342169679213502
Con_Pmod_vs_Con_Scr	A6NDG6	PGP	-0.0731028	18.933863565704012	-2.15255	0.0558677	0.5666467199435191	-4.00609	19.032482603553177	18.95405770927144	18.95436724035578	18.88776589366576	18.887778925780587	18.946054293407432	18.994496559214433	18.87714485700739	18.899760258586344	18.91403528821189	18.927968959619925	18.930450199773993
Con_Pmod_vs_Con_Scr	A6NDU8	RIMOC1	0.0099677	17.2202	0.367256	0.7208112475237398	0.9354148358439759	-5.86564	17.169165337892615	17.1197	17.2051	17.211260585466388	17.137897007020985	17.174769778701858	17.29570807789344	17.320784035770767	17.29363908931869	17.24654605103736	17.25444345087101	17.213377688212155
Con_Pmod_vs_Con_Scr	A6NED2	RCCD1	-0.067676	5.765435975353926	-0.61145	0.554068	0.8843282053568271	-5.74674	5.8264362472570905	5.481334662250236	5.8572600221021105	5.755973128212727	5.5777575515630975	5.6282721338335975	5.95774	5.85563	5.621709808678961	5.8220150773717245	5.801989751677797	5.999115764547121
Con_Pmod_vs_Con_Scr	A6NF01:A8CG34	POM121B:POM121C	0.028413641758533004	18.21774285725144	1.7210372115331078	0.11488985635395817	0.6657774116943541	-4.61617	18.19863300130793	18.18923892613076	18.18836967947025	18.222337760828047	18.21945567746829	18.219689093888196	18.22032744437405	18.201862631266657	18.203571092718963	18.24436976060304	18.24172927415833	18.26332994480278
Con_Pmod_vs_Con_Scr	A6NF36:P00367:P49448	CCDC182:GLUD1:GLUD2	-0.047887	24.396810766532933	-1.38619	0.19476779674831657	0.721058	-5.03955	24.524308733166368	24.47148585588856	24.483333718415736	24.408461112040232	24.42759558898839	24.499410547095827	24.36236220811473	24.295153699618233	24.304761039617308	24.33797459771431	24.378044241805625	24.268837855929867
Con_Pmod_vs_Con_Scr	A6NFQ2:A0A1B0GVM2	TCAF2:TCAF2C	-0.0669175	15.666572314131402	-0.83256	0.42385	0.8348664894343217	-5.59224	15.833614404553796	15.821999794956382	15.663972035691922	15.608377161296646	15.750197661539223	15.760258869755983	15.605713432511182	15.32788743626577	15.35480103975967	15.690938637772604	15.716884618797094	15.86422267667655
Con_Pmod_vs_Con_Scr	A6NHQ2	FBLL1	-0.0229456	16.891553927863413	-0.619676	0.54884280740479785	0.8805221901205474	-5.74176	16.894924684629466	16.93524993044877	16.896467473580344	16.83610132413578	16.887451789956433	16.93425208983749	16.85393363364573	16.86630860967671	16.86659260591397	16.929322659673712	16.973399747543336	16.824642585319214
Con_Pmod_vs_Con_Scr	A6NHR9	SMCHD1	0.00785816	16.848262463901108	0.2831485089740407	0.7826345538822551	0.9552746233869726	-5.89326	16.85812551815322	16.82165760786978	16.867781686608577	16.860755923273146	16.82777312669492	16.8826	16.89372903682179	16.835148863704635	16.803672714472466	16.831001709877576	16.873037868830966	16.823855271541802
Con_Pmod_vs_Con_Scr	A6NHX0	CASTOR2	0.0925661	19.526839675858508	1.5792992178924339	0.14425674047406933	0.694261	-4.80192	19.37122686570868	19.44490326926523	19.555615609056023	19.546089884857196	19.55176198090229	19.551592068502643	19.52336754442243	19.664891672312628	19.496	19.547070044050677	19.624154510205575	19.445427600394815
Con_Pmod_vs_Con_Scr	A6NIH7	UNC119B	-0.0057064	25.17608012872654	-0.149198	0.8842591290010486	0.9760192068290906	-5.92267	25.24149683836705	25.13643914304014	25.174182871711565	25.232532704676164	25.120157548285675	25.182309397086087	25.161973246255755	25.06335403955728	25.134054938821578	25.214466306535822	25.195880797685177	25.2561
Con_Pmod_vs_Con_Scr	A6NJ78:P0C7V9	METTL15:METTL15P1	0.035330440492369775	16.667105741026766	0.9954714042857258	0.34216554111215247	0.7950812154627771	-5.45238	16.741059883911092	16.659065604090184	16.767303766716022	16.74454455438775	16.746229305585246	16.782646716221393	16.549	16.545163654651446	16.44365385595944	16.675308796327965	16.702729788884536	16.648544298016905
Con_Pmod_vs_Con_Scr	A7E2V4	ZSWIM8	0.0350497	15.823994951644007	1.2298562856458688	0.2459198151973418	0.7435648622388488	-5.21668	15.748736801917453	15.79888514192642	15.767758338027278	15.80647555193964	15.811114191163012	15.80293951764051	15.765269084779296	15.861006125837218	15.86547028832516	15.910187910653653	15.889248817111993	15.860847650406454
Con_Pmod_vs_Con_Scr	A8MTT3	CEBPZOS	-0.0346491	22.9649	-0.470549	0.6477030916405303	0.9172073045805539	-5.82225	23.12194486282685	23.15066174999276	22.950096899536774	23.035938267737546	23.084954795753504	22.99786323549232	22.92526247865853	22.7856	23.026524091830808	22.815641316205937	22.73334485103184	22.950531453184404
Con_Pmod_vs_Con_Scr	A8MVW0	FAM171A2	0.18680517952959264	15.037605746626847	4.160272609735855	0.00180127	0.304281	-0.970034	14.834651549782306	14.907435495524473	14.951408667815242	15.056358947080897	15.164712458426315	15.032839846203592	14.78449714520315	14.927131686165696	14.83131164739144	15.32756741579574	15.326169361766532	15.307184738366784
Con_Pmod_vs_Con_Scr	A8MXP9	MATR3	-0.0621706	13.996245517613435	-2.158	0.055349873635432596	0.566241	-3.99805	14.101383582052415	14.069873005462792	14.031203187873045	13.940256661637529	14.039133688709308	14.036557654036226	13.9727	13.966098905711029	13.961156777780964	13.960183622835814	13.940805136778613	13.935567972158193
Con_Pmod_vs_Con_Scr	A8MXV4	NUDT19	0.0211904	19.829763831267485	1.0348652003676906	0.32425958957627043	0.7835542816275385	-5.41549	20.06317724476992	20.04322235889423	20.05338618277474	20.048082098881338	20.112568764448067	20.062705995094955	19.53001027443162	19.546915950213336	19.548709730730984	19.65839289393991	19.641806177093972	19.64818830393674
Con_Pmod_vs_Con_Scr	A9UHW6	MIF4GD	0.00658376	17.143795998278147	0.1626865829532945	0.8738915489772501	0.9738535612251569	-5.92053	17.05060296388346	17.125562964159275	17.072821353236137	17.074519612094285	17.03622336204587	17.157995594222864	17.234520339301557	17.33815361148542	17.21942036814566	17.152235469837652	17.166670577261026	17.096825763664544
Con_Pmod_vs_Con_Scr	B0QY02	TOM1	0.042811	10.900684616476024	1.0099621122336042	0.3354959163851564	0.789198	-5.43895	10.870514246339852	10.7765	10.84659535260117	10.873096033111178	10.918007959271671	10.830894794567476	10.936500777749185	10.769508662489024	10.859244825511023	11.0147	11.03942360039757	11.073224217435737
Con_Pmod_vs_Con_Scr	B0YJ81	HACD1	-0.00478605	20.699461130746908	-0.116153	0.9097496444799322	0.9809472134553775	-5.92714	20.720619614863494	20.69552060274792	20.72380815824839	20.627642516341645	20.82035910506022	20.677588614852805	20.536160395870347	20.55111802240935	20.570526545253177	20.841548462337627	20.838341117871774	20.790300413106134
Con_Pmod_vs_Con_Scr	B1ANH0	GUK1	-0.0120105	21.77561317262556	-0.462266	0.6534365937030753	0.9192431008934259	-5.82611	21.734353150090733	21.71901357890725	21.6877	21.68396493020136	21.725454648431217	21.695617298206137	21.815209807238368	21.819021844798456	21.895733396560026	21.86422072367252	21.83628752789891	21.830779376472577
Con_Pmod_vs_Con_Scr	B2RTY4	MYO9A	0.00788664	17.060073279456123	0.27667803108123223	0.7874633479579198	0.955927	-5.89509	17.005467004211088	17.07126702732776	17.074579191511013	17.084047728444002	17.0235	17.06745294452868	17.06252377008996	17.092250475082935	17.011187181800693	17.058122074601677	17.092421402983728	17.07808808913033
Con_Pmod_vs_Con_Scr	B3KS81:O95218	SRRM5:ZRANB2	-0.00694231	17.160171586278206	-0.182205	0.8589340305440569	0.9700238487574436	-5.9171	17.232194450527636	17.094825908338596	17.15576563782219	17.145197179443027	17.162377527320363	17.154384353567426	17.157988543789102	17.09295832977329	17.20856383639146	17.201916590424645	17.183148376268498	17.132738301672234
Con_Pmod_vs_Con_Scr	B3KU38:P0DPB3	IQCJ-SCHIP1:SCHIP1	-0.042346	15.877726611768052	-1.30988	0.21850787198527621	0.7342112333720765	-5.12784	15.912500732447914	15.887866738889194	15.821671886844044	15.801766489400109	15.861217228726224	15.832017766665656	15.876754403872477	15.804648432936002	15.874819229126295	15.948045916266103	15.917111242888318	15.9943
Con_Pmod_vs_Con_Scr	B4DEV8:P25786	NA:PSMA1	-0.0293617	22.09794662291444	-1.116	0.2896101830261257	0.764623	-5.33595	22.138928493241277	22.078920715657976	22.073997881553723	22.054537634437715	22.08268521865252	22.066539130400905	22.1173	22.061528679060935	22.148455989812465	22.12876639269528	22.111326275190955	22.1123
Con_Pmod_vs_Con_Scr	B4DL54:P49356	CHURC1-FNTB:FNTB	-0.0329031	20.28031683534453	-1.39481	0.19222711652602134	0.721058	-5.02936	20.29570996357226	20.327666959786715	20.317818262288544	20.25487031315212	20.29603514806619	20.291580532413725	20.282434003202248	20.28797272237428	20.28990938624174	20.2464	20.277435712267547	20.195920628008658
Con_Pmod_vs_Con_Scr	B4DY08	HNRNPC	0.028122839097235897	17.620545378604458	0.7523989574329796	0.46854433534142437	0.8481034175859284	-5.65314	17.628395303361263	17.5426	17.589021431076834	17.678058338749718	17.530164746578592	17.6361	17.671685007378425	17.687932817653675	17.660690641193185	17.613399375358412	17.570269905071594	17.638200269140512
Con_Pmod_vs_Con_Scr	B5MCQ4:H0Y9W8:Q9Y2W1	DGCR6L:FAM193B:THRAP3	0.042949530765469035	16.316896399458315	1.756275222013016	0.10847849279831412	0.6600349394757536	-4.56868	16.240692049395303	16.169378196309744	16.242872819986353	16.259528634031096	16.257765054501945	16.264497969454766	16.37481589340165	16.36701608547195	16.37214627194517	16.432127190436855	16.440684243285567	16.381232385279375
Con_Pmod_vs_Con_Scr	B7Z7F3	RANBP3	0.14638646322447713	4.237443753053985	0.6304563647179987	0.5420380910789578	0.8780418273499294	-5.73515	3.810622891253203	4.049867610987041	4.313090673801749	4.714592118280509	4.052899345962244	3.845249101472673	4.449605575917245	5.046393894403719	4.992407872511485	3.851035049382902	3.663702693577271	4.059858209097779
Con_Pmod_vs_Con_Scr	B7ZAQ6:P0CG08	GPR89A:GPR89B	0.013536734794250549	21.637508255857004	0.6377759057462871	0.5374456337644737	0.8757653423475618	-5.7306	21.54690439311676	21.601779363367527	21.588174069981807	21.61975074664973	21.57517260977364	21.58254467442547	21.74729105349449	21.776408861760384	21.77254031730247	21.60837382534265	21.61821912844567	21.61294002662346
Con_Pmod_vs_Con_Scr	B8ZZC5	GLS	-0.0266134	25.738911076181132	-0.594525	0.564905	0.8865401293506525	-5.75678	25.782516140988022	25.692758190294313	25.80151090889687	25.73206558349709	25.673608174237195	25.79127127258829	25.75022736604734	25.75305763011068	25.635713202834907	25.75856211468549	25.796694664154614	25.69894766583878
Con_Pmod_vs_Con_Scr	C0HLS1	SCRIB	-0.0532038	12.207515643850272	-0.719346	0.48782	0.8547662959862634	-5.67665	12.177266211478925	12.271575674413594	12.231594783820537	12.18237294132463	12.1664	12.172041689986775	11.986384318606929	12.349212811682284	12.236927801704532	12.310874127580073	12.201666526500368	12.203860312247423
Con_Pmod_vs_Con_Scr	C9J0J7	PFN2	0.12409327876472886	20.39920314519485	2.000424039567054	0.0723186	0.5972308734050852	-4.22753	20.235172869374615	20.28891044405981	20.34286740044971	20.4719	20.49741099932545	20.26994965493597	20.274368033737996	20.31177676564892	20.45692262308429	20.54567608656337	20.52870184814299	20.566811121098183
Con_Pmod_vs_Con_Scr	C9J406	IMMT	-0.0157772	21.568186232845743	-0.538225	0.6017811077127883	0.9004320826151885	-5.78829	21.648378101124177	21.60361704303329	21.596214520612712	21.542132283146387	21.621343902843023	21.637401908064955	21.51234178092258	21.511825714653124	21.511703404332746	21.567818167799302	21.56486881201339	21.500589155603254
Con_Pmod_vs_Con_Scr	C9J4A7:Q8TD55	NA:PLEKHO2	0.022361449339246775	18.182207973661193	0.8166677921876659	0.4324771428048888	0.8383377081920187	-5.60474	18.155018775119988	18.18009073264861	18.231621839270503	18.225804764248483	18.224445530854283	18.183565399954063	18.131610980768823	18.147318130512655	18.07514095832233	18.188950516925132	18.211731968828627	18.23119608648084
Con_Pmod_vs_Con_Scr	C9J4I9	PXDN	0.0568439	16.514698961712664	0.8112647569170962	0.4354366377389346	0.8388709933359708	-5.60894	16.460509842831737	16.30144190983904	16.461811865546068	16.514370889505013	16.34574517991325	16.534179188945124	16.57455571516309	16.63906086764615	16.392801691011428	16.64866541142817	16.623156230316123	16.680088748406796
Con_Pmod_vs_Con_Scr	C9J6P4	ZC3HAV1	-0.0167861	23.66977391764381	-0.695075	0.5022842544362744	0.8605521265437722	-5.69332	23.75258992604581	23.73895113277813	23.775277713550057	23.71326060637872	23.763238023210377	23.73996196299454	23.59526397153068	23.559194392956098	23.5581	23.61171143621893	23.65066977289851	23.579072903386056
Con_Pmod_vs_Con_Scr	C9J7I0	UMAD1	0.019635184930510974	16.953718397330444	0.4307510706467317	0.6754645498691904	0.9245835873384326	-5.84019	16.970878737381323	16.823929280114662	16.84606795134666	16.847944093927126	16.967789186870903	16.88404824283616	16.995511779691906	16.956351078094848	17.001338357757252	17.06619792312158	16.98334078133163	17.101223355491292
Con_Pmod_vs_Con_Scr	C9JA33	PALM2AKAP2	0.0946182	15.28233692395972	2.3052270935299775	0.042987718349467866	0.5358613997467039	-3.77869	15.365786157269492	15.234800240655527	15.35651818013431	15.40366431872159	15.388024352857077	15.449270465482408	15.181020588988323	15.196163548467313	15.06853649674758	15.254816835787723	15.247959778424416	15.241482123980878
Con_Pmod_vs_Con_Scr	C9JE79	CALD1	0.0838902	7.303357197565781	0.6387043997828666	0.5368646840540077	0.8755609343291516	-5.73002	7.392629740519295	7.0937360334484385	7.24399	7.48141	7.141433445735792	7.359183124396067	7.47566	7.23763	7.112211737574821	7.2815314243302796	7.208610828783792	7.612265678279728
Con_Pmod_vs_Con_Scr	C9JLW8	MCRIP1	0.00139391	15.14809783009135	0.023421631536064153	0.9817584865879283	0.9941988862030771	-5.93374	15.133823685683533	15.020791488249875	14.987418266983957	15.063998204992082	15.05822124183924	15.02399572799274	15.271608645024372	15.110703409534269	15.220416721625597	15.267484106644998	15.199763926186124	15.41894853633942
Con_Pmod_vs_Con_Scr	C9JW96:P35232:A0A8I5KWR0	PHB:PHB1:TFCP2	0.0261038	22.5959	0.6883968088991497	0.5063090414881668	0.8605521265437722	-5.69781	22.61354572153328	22.615471471711977	22.62271610159972	22.607208260573923	22.62252081685696	22.70031560508703	22.56357158876171	22.617085410274967	22.567912420727893	22.56856886999114	22.5986	22.45264670501881
Con_Pmod_vs_Con_Scr	C9K0J5	RAPH1	0.030978420526398764	21.961136154394882	0.8642461263207765	0.406997	0.8305790047488175	-5.56669	21.77933584748925	21.790124504725377	21.826200132517297	21.793279018549377	21.824411258982057	21.870905468779693	22.080761183418723	22.10124271358504	21.989889475036673	22.157944068237533	22.209861958663097	22.10967822275447
Con_Pmod_vs_Con_Scr	D3YTI2	ACP1	-0.0217517	19.317260001932294	-0.414827	0.6867193428543148	0.9269120979652602	-5.84694	19.402824804651196	19.25640316684712	19.29292147961919	19.21127381788525	19.29673700360822	19.378883535341213	19.405739579984186	19.50276053804299	19.41503322118853	19.276986377688647	19.214593995749645	19.152962502581342
Con_Pmod_vs_Con_Scr	D6R9P3	HNRNPAB	0.00723429	18.890832921753045	0.37611311984851575	0.7144126438168126	0.9345001222922931	-5.86232	18.870544144245425	18.91398242856884	18.877337261031844	18.88447311628592	18.90426028688458	18.894833313982048	18.846148787498315	18.87202030000245	18.8803	18.920204061950667	18.920533230579498	18.905398582104745
Con_Pmod_vs_Con_Scr	D6RBQ9	HNRNPD	-0.0653703	6.509315553960605	-0.868887	0.40456821140071764	0.8296090302348127	-5.56288	6.490032159924098	6.31337	6.424859257710235	6.4262039923840675	6.217684107370285	6.388263846493933	6.78356	6.732855733082882	6.577512728815925	6.553927063013846	6.503887385397412	6.699632209139857
Con_Pmod_vs_Con_Scr	D6RIF6	SLAIN2	0.029290626003726672	15.34968506365835	0.855208	0.4117571431362853	0.8314029751114795	-5.57406	15.30405125079142	15.28757535828219	15.277906602026254	15.340521786295426	15.349205954324397	15.267677348491215	15.403923131947828	15.38411926547414	15.439686400477813	15.369324332518296	15.32118810650789	15.451041226763332
Con_Pmod_vs_Con_Scr	D9J307	HLA-B	0.010296284823045454	28.79292173002493	0.0866759	0.9325797967808339	0.9854296731349035	-5.93019	29.66154463097095	29.704448831734055	29.829205085474424	29.644523658701992	29.68392189386274	29.897641850083826	27.84350298041979	27.948006867985477	27.67560700038794	27.9122	28.106008802223062	27.60844893480551
Con_Pmod_vs_Con_Scr	E5RFP4	RBPMS	0.037090129682605166	12.877245129566678	1.1279606918964546	0.2847547099042685	0.7614365538045824	-5.32384	12.877846021364636	12.924872847912102	12.952604052201607	12.978252279293663	12.920521688524731	12.967819342707774	12.810198371581723	12.88134863878264	12.753773195911371	12.808063517425538	12.827019076372007	12.824622522722333
Con_Pmod_vs_Con_Scr	E5RG30	SNX16	0.0369214	16.29200774801996	0.6287919256453437	0.5430855357783961	0.8785590882001614	-5.73617	16.188590141122834	16.287718938478584	16.334805609737856	16.263351217592664	16.420647218460296	16.237880371050387	16.228439881855913	16.226690538362313	16.286260032742742	16.342159655351306	16.435733277037112	16.251816094447502
Con_Pmod_vs_Con_Scr	E5RI56:P63208	NA:SKP1	-0.0555561	20.60565005842879	-1.69402	0.12003570234930838	0.6671353408175047	-4.65224	20.65267598577819	20.59540935135074	20.5607	20.52893275378251	20.55137066473284	20.561819546451325	20.648145965596875	20.529105798856687	20.60861764526011	20.668213507247273	20.662681178972473	20.700122382915165
Con_Pmod_vs_Con_Scr	E5RIH3	PSD3	0.0882105	23.84394711148106	0.5156413512114328	0.6169179792732973	0.9075702115938638	-5.8001	23.45073951651196	23.4131	23.826343834778093	23.65937295480797	23.501530769880915	23.793872005939832	24.047190013820455	24.245238501361108	23.75365704685302	24.170860760222613	24.433588433002257	23.8319
Con_Pmod_vs_Con_Scr	E7ENL8	ARHGEF7	0.0971	16.693507641047397	0.886267	0.39555945382876256	0.827785	-5.54846	16.991490894762517	16.922169906912327	16.939394401470693	17.067247486373017	17.199560397435153	16.87754733766902	15.965178224641932	16.173082030883254	16.420414882278806	16.671602464074265	16.46397349185021	16.63043017421757
Con_Pmod_vs_Con_Scr	E7ENQ6:Q9P0J0	NA:NDUFA13	0.0458276	22.70415503349093	0.8906909292230125	0.39328866914411853	0.827785	-5.54475	22.719432710717477	22.765087010683377	22.720849968221067	22.734489588091165	22.78070185014727	22.827660931123276	22.614560317006703	22.719719207697786	22.744912718429912	22.662123099423734	22.674421779021596	22.485901221327826
Con_Pmod_vs_Con_Scr	E7ENX8:Q03519	NA:TAP2	-0.0445013	24.607213133852056	-1.10887	0.29253858830553603	0.7672258808013136	-5.34314	24.979372291711822	24.97062941685882	25.02429422994009	24.91432982481883	24.92954710092474	24.996915220930653	24.296870212581815	24.298776336605567	24.208123558471744	24.226747742580997	24.292785480846053	24.14816618995355
Con_Pmod_vs_Con_Scr	E7ERK9	EIF2B4	-0.0319675	19.73111790538144	-1.31363	0.21728826073287946	0.7328840293219986	-5.12359	19.738078898533768	19.69501880856433	19.68448224738951	19.66811734290533	19.669021220577267	19.684538974114517	19.801755074672258	19.731150126505774	19.753225145464217	19.772273062510457	19.76581133255229	19.809942630787564
Con_Pmod_vs_Con_Scr	E7ETU9	PLOD2	-0.00738071	28.029847738913265	-0.112803	0.9123404556829355	0.9812852589387964	-5.92753	28.187390159295735	28.154802795686184	28.06204908163444	28.13499244982061	28.19566123703293	28.05144623252571	27.78515495068082	27.74867876483203	27.942402125161095	28.038705861629012	27.92189675863922	28.134992450021393
Con_Pmod_vs_Con_Scr	E7EU81	GOLGB1	0.0735866	19.959251896900778	1.8719967327924727	0.0896501	0.6348772667138852	-4.40946	19.91644315126927	19.92860776312983	20.000263670091385	20.032699034386624	20.01041657161628	20.022958724165484	20.03194689464301	19.94230452233595	19.880249962558626	19.875615913718487	19.96667053393132	19.90284602096307
Con_Pmod_vs_Con_Scr	E7EUA0	NEXN	0.00221563	14.347697263166719	0.051118179983047414	0.9602025435466335	0.988566	-5.93269	14.431163135509502	14.33439797260148	14.37522480473798	14.373154816059342	14.423252662871644	14.351025337672835	14.261405051524234	14.096203257211243	14.257565594318672	14.417291779615311	14.437074799571873	14.414607946306518
Con_Pmod_vs_Con_Scr	E7EX29	YWHAZ	0.0936074	12.859649263183698	1.3929161946027326	0.19278181357967877	0.721058	-5.0316	12.926201446726443	12.715197731914037	12.886668505216257	12.849520985675284	13.033251857743888	12.926116964187903	12.78847308157667	12.81100344248602	12.86775446374236	12.9058	12.88649591967887	12.71929928699074
Con_Pmod_vs_Con_Scr	E7EX44	CALD1	0.1594641376423951	17.89466494918835	2.12501	0.0585545	0.5693936031158129	-4.04659	18.080252683500134	18.05418216833411	18.084264476843245	18.28432932070662	18.32342915142492	18.089333269473116	17.36059979903883	17.457163791868247	17.521360786525264	17.826299270536424	17.688032345797428	17.966732326211865
Con_Pmod_vs_Con_Scr	E9PAM4:Q9BTU6	NA:PI4K2A	0.0356559	23.615205058629822	1.2645020318568359	0.23372724458572366	0.7387203027034835	-5.17871	23.592757096067707	23.58334318099669	23.61846410688289	23.637064985714392	23.59874358122049	23.665723568939068	23.628199173015737	23.600076042615942	23.54128320220964	23.628480193653004	23.673034148363804	23.615291423878514
Con_Pmod_vs_Con_Scr	E9PAV3:Q9BZK3	NACA:NACA4P	0.19775825166506067	22.20917765852739	3.2846093588743006	0.00784392	0.39476914806903657	-2.27232	22.231124540421742	22.14348583631485	22.22902217413819	22.50089359313589	22.265844411324476	22.43016930140959	22.062770800449403	22.181326234853668	22.037408711957433	22.151381082708063	22.08044675962942	22.19625845598596
Con_Pmod_vs_Con_Scr	E9PCH4:Q8TEU7	NA:RAPGEF6	-0.0428703	13.498501386908838	-1.39379	0.19252573611437224	0.721058	-5.03056	13.552026519589726	13.558624717738772	13.498878514119742	13.483704808759963	13.519413046678215	13.477801140692591	13.512430017521654	13.429483651943327	13.496021941772495	13.46510392362526	13.45274580471946	13.535782555744856
Con_Pmod_vs_Con_Scr	E9PCW1	GOSR1	-0.0311336	22.43463545743994	-1.46654	0.17215612976725717	0.7095296467100889	-4.94302	22.4942	22.48131874262552	22.44706175740146	22.423982503697395	22.45569430249046	22.44955063197263	22.47089302164838	22.423171229852972	22.457667678396152	22.36683749125637	22.35964476138449	22.38555551363373
Con_Pmod_vs_Con_Scr	E9PDU6	CNN3	0.16009175338861326	18.154898666305304	1.232015719490335	0.245145	0.7435648622388488	-5.21434	17.967927476716397	18.25387183456404	18.387803816761313	18.381397687744048	18.357485492569545	18.35099520789399	17.768570888346677	18.23256065860263	17.77837398202276	18.139622099692343	18.233378998088053	18.00679585266186
Con_Pmod_vs_Con_Scr	E9PFN4	SLC4A7	0.039258184241813154	14.276806791596444	0.5854154883517751	0.5707863668500242	0.8892630255981676	-5.76208	14.23593663734755	14.15623055321876	14.277204350739884	14.364280819691013	14.200667092571608	14.222198181769013	14.384942276082052	14.451336852780267	14.290274688376083	14.214037542762604	14.143439185940792	14.381133317877705
Con_Pmod_vs_Con_Scr	E9PGM1	EIF4G1	0.0395111	18.00332678619785	1.5221021510766166	0.15787257074666505	0.6987405136268369	-4.87428	17.978464155407966	17.992161386295567	18.02328156465511	18.068643980263804	18.00330507501137	18.040491287597185	17.966784673954944	17.97146923459571	17.987714702940988	18.007215476148065	18.04094336047446	17.959446537029013
Con_Pmod_vs_Con_Scr	E9PHB8:Q9UJ41	NA:RABGEF1	-0.020165	21.76606717200988	-0.713337	0.4913773513696408	0.8577689585657122	-5.68083	21.78088091779757	21.739386253075693	21.725408922012136	21.72304710820623	21.743022410790505	21.719111559861712	21.804106190584584	21.767589481977655	21.774317060039294	21.79457414370924	21.75671228510453	21.86464973095941
Con_Pmod_vs_Con_Scr	E9PIE4	MTCH2	0.0815996	23.289480474621246	1.5633288463243231	0.14795080997601723	0.694261	-4.82228	23.166509023168025	23.28650843798269	23.29771012620851	23.330197977595233	23.32214197287873	23.343186541497793	23.224835934027368	23.35999000883502	23.298936330153573	23.304605227708173	23.364212295995568	23.17493181940428
Con_Pmod_vs_Con_Scr	E9PK06	EEF1D	-0.0920234	16.03208962977273	-1.21112	0.25272264455224397	0.7439648048457665	-5.2369	16.18611280085086	16.08098434085268	15.981172603723603	15.963086211564551	16.069544484199266	15.939568746367296	16.055695376568284	15.877852299420974	16.16453663424019	16.027156758104258	15.937205902441498	16.10215939893932
Con_Pmod_vs_Con_Scr	E9PK54	HSPA8	0.042962	18.38659470103102	2.344857923909729	0.0401452	0.5358613997467039	-3.71898	18.42534640374039	18.44162560888224	18.41475577532661	18.445297923079025	18.487734497125366	18.47758150518009	18.253395088748512	18.266308648211115	18.26341295183522	18.393260703889464	18.390417491959862	18.379999814394328
Con_Pmod_vs_Con_Scr	E9PK91	BCLAF1	0.0115326	15.071316249099045	0.41837012024866344	0.6842081922892235	0.9269047527617018	-5.84546	15.06143601402352	15.07757761633038	15.085556360311006	15.084012854581182	15.07702915623582	15.098125901571583	15.037901251063392	15.083903845596154	14.972642728354304	15.080777101182331	15.074491392283536	15.122340767655318
Con_Pmod_vs_Con_Scr	E9PKP7	UBTF	-0.0215754	15.905343828357681	-0.68572	0.5079278504221745	0.8605521265437722	-5.6996	15.820699506232426	15.782726171055806	15.825222634977909	15.777752764439018	15.755546300313023	15.830623027987876	16.048232737984343	16.022638164524064	16.00074478036502	16.008969593184545	16.05205719261354	15.938913066614608
Con_Pmod_vs_Con_Scr	E9PKQ5	CCDC90B	-0.0563045	18.032439769073857	-0.675144	0.5143541045580875	0.8645526438316791	-5.70662	18.163540883035388	18.05311244333592	17.95577349813672	18.00409438814136	18.06340088849749	17.936018181275752	18.02226022454657	17.82473437255624	18.17486853988329	18.071136784729344	17.979362033760932	18.140974990987296
Con_Pmod_vs_Con_Scr	E9PKU7	GANAB	0.10083602178962181	18.15681592773985	1.2203640198289196	0.24934846257292573	0.7435648622388488	-5.22696	18.008794814144903	18.1983	18.287	18.399674284862037	18.18490378139419	18.21206783978975	17.941426764723172	18.174664369290344	17.95895057133011	18.14598745739883	18.187805662498604	18.182172560914033
Con_Pmod_vs_Con_Scr	E9PLP0	CARS1	0.0756485	13.817545260035441	2.2452144838657655	0.0476665	0.5458912928716255	-3.8686	13.777364649704586	13.816697395147129	13.8282	13.925830178339144	13.90822067917574	13.815127784905272	13.684881372973669	13.704306500770716	13.731051989279994	13.856261818199096	13.836673723507957	13.926
Con_Pmod_vs_Con_Scr	E9PLY5	MACF1	-0.0404165	19.669994706753034	-1.23513	0.24402965909466723	0.7435052725345063	-5.21095	19.78156264542284	19.827274832870437	19.73955264708087	19.72935310631789	19.77088895678339	19.726898461848084	19.531239765931407	19.58359400813479	19.606078482295658	19.587492203212804	19.5285	19.62745636363935
Con_Pmod_vs_Con_Scr	E9PM92:O00193	C11orf58:SMAP	0.036903606940009936	11.639526341208795	0.8309256214228229	0.4247319490619331	0.8348664894343217	-5.59353	11.637369783174508	11.50000179583363	11.582113940330926	11.616041441007615	11.590035008921332	11.62411989023014	11.674423516998404	11.50093992848866	11.590300127105278	11.77831460135301	11.819156139721583	11.76149992134045
Con_Pmod_vs_Con_Scr	E9PNX1	SERPINH1	-0.0905036	17.33548730643541	-1.25561	0.2368096351464171	0.7398028321863026	-5.18853	17.539055535889165	17.496169025493714	17.52713657450154	17.309161723803744	17.529210156012432	17.45247846412733	17.16188013020893	17.121330833935183	17.230927979808747	17.269804688943644	17.338000050906743	17.050692513593752
Con_Pmod_vs_Con_Scr	E9PP27:Q15293	NA:RCN1	0.00330976	23.28794744904819	0.0576188	0.9551473170378728	0.9879240501642578	-5.93233	23.357680752628504	23.1757	23.25340975748886	23.22184817025081	23.251022544754623	23.323866628902273	23.328588536593795	23.137735810492927	23.212821120652965	23.404970477978917	23.4525	23.335197076319183
Con_Pmod_vs_Con_Scr	E9PQ42:P0DTL6	TMEM276-ZFTRAF1:ZFTRAF1	0.043529428183383345	16.49694302915469	0.9605757489247597	0.3586253188075771	0.8070228334008717	-5.48409	16.422396521390496	16.514373171227597	16.52602500561181	16.57428910483107	16.495288333205604	16.523805544743375	16.433082758216308	16.622378900407675	16.502770218384327	16.463098980539588	16.445378666439563	16.440429144858864
Con_Pmod_vs_Con_Scr	E9PQ56	PUF60	-0.0376029	21.19923190099491	-1.665	0.1257926945253214	0.6678546603679277	-4.69065	21.220945029251556	21.232043722166537	21.18809839731877	21.149328583990844	21.180136413777905	21.19881349220885	21.220402201346445	21.172537571142698	21.16707857618722	21.209276292804745	21.22117568030664	21.23094685143673
Con_Pmod_vs_Con_Scr	E9PQ68:O95169	NA:NDUFB8	0.041169882532201996	19.599392446364593	1.2800801835107523	0.22840757005792142	0.7387203027034835	-5.16139	19.542836223526187	19.584038004211266	19.63661709978695	19.688774335276623	19.599921285025165	19.598305354819203	19.59406716366107	19.66421899185459	19.616995300672063	19.549019599030046	19.557800262480924	19.560115736031022
Con_Pmod_vs_Con_Scr	E9PQG4	PDE4DIP	0.056606	15.488466008860604	1.4124453555487955	0.18711614152919806	0.7178520113664869	-5.00839	15.356692271914133	15.487329380570197	15.471644526309008	15.502694477681784	15.504068025611655	15.478721778813595	15.50317481941268	15.606470262184049	15.57481234605049	15.465456100313602	15.505510258858791	15.40501785860726
Con_Pmod_vs_Con_Scr	E9PRG8:E9PLD3	C11orf98:NA	0.0356447	16.76309478781994	1.1234403315500625	0.28658287172729435	0.7614365538045824	-5.32843	16.79013302892048	16.76892962083879	16.709206292789947	16.80002105963664	16.785095680178905	16.79008644068831	16.769204953937788	16.7893	16.865389671670442	16.71638340937798	16.650594778960766	16.722754481402834
Con_Pmod_vs_Con_Scr	E9PRY8	EEF1D	-0.0560773	24.52808826878205	-1.13016	0.28386793246158615	0.7614365538045824	-5.3216	24.64872741808004	24.577428254535143	24.489177044244315	24.481559723673307	24.54570729229586	24.51983392171566	24.49800960082086	24.362675796926062	24.542898641284825	24.564381370866204	24.52113998443142	24.585520176510897
Con_Pmod_vs_Con_Scr	E9PSG1	CAST	-0.0503005	13.146049666055614	-0.498314	0.6286604169458889	0.9094742188058305	-5.80884	13.226004238099309	12.890632326437911	12.94338645635729	12.83927692795209	13.020540942753708	13.049303715435864	13.494374676223678	13.144402551887024	13.25880690750704	13.29114049024907	13.289097407816506	13.305629351947886
Con_Pmod_vs_Con_Scr	E9PSI1:O15321	NA:TM9SF1	-0.0215584	21.613153733255437	-0.80666	0.43796936488996097	0.8404421358308141	-5.6125	21.624912300900256	21.56898829987168	21.576865300721774	21.589626926447018	21.54634177092008	21.57012187634088	21.716855091179955	21.64726003189139	21.677773281832536	21.601106017493084	21.587318047842544	21.650675853624048
Con_Pmod_vs_Con_Scr	F5H5A3	MAP4K3	0.038802214567924764	12.159677316612235	0.8590655436094679	0.40972101531959815	0.8307814121077258	-5.57092	12.196037753804385	12.052737190168688	12.099853073454288	12.197230092324356	12.056851403245489	12.210953165561293	12.216317453832692	12.170302949839735	12.159571364492418	12.194824720539408	12.159662606584751	12.201786025499324
Con_Pmod_vs_Con_Scr	F5H5X6	NOP2	-0.156073	10.495629715692397	-3.15406	0.00982781	0.40001201681270493	-2.47315	10.690160150934634	10.629883348102659	10.517103371345412	10.452743944789807	10.439793052395988	10.47639049025002	10.490779816577303	10.398142168492338	10.556849962496486	10.443625128568902	10.374239714994609	10.477845439360609
Con_Pmod_vs_Con_Scr	F5H7W8:Q96C57	C12orf43:CUSTOS	0.042865574922814176	18.606133899869473	1.2599118094720287	0.23531385001125837	0.7392859702681261	-5.18378	18.520461931086384	18.53268525277124	18.616158032436488	18.63541851086115	18.588004520236943	18.57447890996447	18.578470643393615	18.666546873119284	18.6312	18.65716479608964	18.67284260702094	18.60021483776772
Con_Pmod_vs_Con_Scr	F6TDL0:Q92569	P3R3URF-PIK3R3:PIK3R3	0.049148008833064694	13.102857114302061	1.2529328191733486	0.2377429020821408	0.7398028321863026	-5.19147	13.182072514133017	13.271341430264194	13.283472702328105	13.324154477139938	13.27594094206141	13.28423525402316	12.96846860990563	12.869231358816537	12.875071438165762	12.923642217027414	13.031915749908965	12.944738677850609
Con_Pmod_vs_Con_Scr	F8VP89	EIF4B	0.0544735	16.490336890829095	1.225211887359027	0.2475926204909525	0.7435648622388488	-5.22172	16.44302278920913	16.347900205478762	16.389051414040917	16.433506163097586	16.527988386362154	16.381900278430123	16.48610619218161	16.49558237666537	16.55940163171945	16.619583564577102	16.536344020524346	16.663655667662603
Con_Pmod_vs_Con_Scr	F8VQZ7	METAP2	0.0336868	13.051142644564639	0.6199590537406526	0.5486634802919084	0.8805221901205474	-5.74159	12.860954431638415	13.0162	13.009226682237076	13.112090988519975	12.940997866753357	12.934311345520126	13.216107571104134	13.250754680470704	13.221665698584236	12.970001132914764	13.00509183588434	13.076350872693528
Con_Pmod_vs_Con_Scr	F8VRH0	PCBP2	-0.070423	17.89099807082192	-2.77272	0.0190772	0.4805242302543434	-3.06315	17.818678115472174	17.86508208255119	17.867225342106465	17.748625650210016	17.816365507077393	17.77472544393068	17.964588220462527	18.013384052297734	17.955407179869567	17.95601290495408	17.972811713999906	17.939070636931294
Con_Pmod_vs_Con_Scr	F8VXC8	SMARCC2	-0.0194562	16.545744610948244	-0.60439	0.5585738830401414	0.8858892756510479	-5.75096	16.52132938872905	16.469211896624213	16.526683884772254	16.482206836022407	16.443857441074556	16.53279232378834	16.660539158650295	16.66086828422297	16.578705346551008	16.561403832107114	16.58678643545748	16.524550503379242
Con_Pmod_vs_Con_Scr	F8VZ52	DNM1L	-0.00077489	18.01188121300049	-0.0229401	0.9821334774781092	0.9941988862030771	-5.93375	18.01406799737909	18.00672465216538	18.01642168173759	18.042539894066405	18.045769375756297	17.946580391789702	18.002496010021932	17.986277450113242	18.07333251717728	17.99710429666543	17.964841259894204	18.04641902923932
Con_Pmod_vs_Con_Scr	F8VZX2	PCBP2	0.0860922	17.115464525891497	2.5489795655056455	0.0281741	0.5084436347853483	-3.40809	17.14701672346308	17.075494929646705	17.071696759575666	17.20340553416447	17.14703479309166	17.202044659681125	17.03462009707721	17.11080059911806	17.131617610757136	17.12467051425669	17.04534354240504	17.091828547461123
Con_Pmod_vs_Con_Scr	F8W0P7	ATP5F1B	-0.040458	21.968960582483884	-1.03171	0.32566833291137676	0.7838578728604036	-5.41849	21.970123397410593	21.91735401855253	21.909286654351167	21.868691815788864	21.854422297940033	21.952275842933872	22.12792545661627	22.015315811813338	21.980669773108787	21.99098970470151	22.024762828543597	22.015709388046034
Con_Pmod_vs_Con_Scr	F8W6C2	SPATS2L	-0.00565944	14.844342698738258	-0.193047	0.85065	0.9700238487574436	-5.91503	14.78870684016979	14.755915082680572	14.716252708034196	14.73607063707694	14.76488452998339	14.742941137455674	14.936811620612264	14.91613127222296	14.935718750433724	14.942837307071516	14.891743080134724	15.00409941898334
Con_Pmod_vs_Con_Scr	F8WCI5	C3orf33	-0.0131335	19.764508169732025	-0.232762	0.820475	0.9641259131817801	-5.90644	19.886733934211488	19.84341067500586	19.791599383156218	19.76285130636017	19.8228	19.896683606704663	19.74651090476816	19.61965625445422	19.760681747012967	19.70871929125228	19.76497031537459	19.569471920437977
Con_Pmod_vs_Con_Scr	F8WEM9:Q8N720	NA:ZNF655	-0.0919116	9.516400580065326	-0.839684	0.4200207610651927	0.8348664894343217	-5.58657	9.72709	9.46532	9.435669576078288	9.28233	9.547431089336188	9.522580841713584	9.484056817138336	9.142343593056106	9.45261	9.753167109827526	9.777439705570616	9.606757536617067
Con_Pmod_vs_Con_Scr	G3V2R1	SAMD4A	-0.0596042	17.6616	-1.00787	0.3364522014944351	0.7892362760229079	-5.4409	17.7948	17.804917605059902	17.721280222486353	17.699953281932814	17.773877921929127	17.66839361142221	17.603426191448214	17.575719419895396	17.5627	17.542572838338163	17.458317053514975	17.733717353369965
Con_Pmod_vs_Con_Scr	G3V325:O75127	ATP5MF-PTCD1:PTCD1	0.055285404611289835	23.044878050597394	1.0058854292503716	0.3373624973287146	0.7900682990800925	-5.44274	23.132542279977432	23.01872310528548	23.00915701517173	23.02617870323595	23.14122976201585	23.158870149016707	23.011303069509268	23.036074745081667	23.130391982220644	23.02810331961386	22.987155539331695	22.858806936708454
Con_Pmod_vs_Con_Scr	G3V3H3	KLC1	-0.0623998	17.4234	-2.58287	0.026560098163701598	0.5067923048135473	-3.35605	17.451643562273567	17.432724852478305	17.47755612704669	17.41915837670827	17.39449108745349	17.361075543260966	17.440759113493424	17.438431815160516	17.41626590771831	17.40190769589131	17.391906720253782	17.45522378122299
Con_Pmod_vs_Con_Scr	G3V3S8	RBM23	0.0854936	3.5745640228246724	1.1734832072167563	0.26684736197757786	0.7470827452808014	-5.27682	3.5082059311090017	3.3326135610508594	3.5067657877137357	3.650541059093287	3.416863629336584	3.5366614096212707	3.6872098706712872	3.4575949839094147	3.586422541600273	3.714294229029104	3.792982040843759	3.704613229917495
Con_Pmod_vs_Con_Scr	G3V5V7	HNRNPC	0.0377338	11.038673424966298	0.8660812069363669	0.4060356661019755	0.830289	-5.56519	11.056723426276983	11.013487945548809	11.040798281326468	10.973780555913637	11.15904644612512	11.09138398023125	11.093220940038886	11.050257880139984	11.038133705275891	10.993172697251964	11.029297983515283	10.92477725795129
Con_Pmod_vs_Con_Scr	G5E948	MAP4K4	-0.0302484	21.35021816305455	-1.3287	0.21243840939193817	0.7303854404142555	-5.10638	21.36005769842245	21.347934540493412	21.33659875891596	21.291150703590503	21.323439037010207	21.339256132494807	21.38944276946872	21.332166004323906	21.321430239798605	21.376463138742164	21.397748095724715	21.38693083766915
Con_Pmod_vs_Con_Scr	G5E9V6	ARMC8	0.0358822	15.059381475616666	0.9917829962723883	0.3438786765157238	0.7962586476285329	-5.45578	14.960754906853415	15.040843144992715	15.03815021193399	15.108231025579094	15.001892555636797	15.037271263524914	15.07380331632509	15.188832120643122	15.134274761581247	15.045463561476245	15.036812726820962	15.046248112032396
Con_Pmod_vs_Con_Scr	G5E9Z2	CLPTM1L	0.011232088754489666	24.621967962478585	0.2814993653250656	0.7838643730448307	0.9552746233869726	-5.89373	24.730152225335537	24.709175150227153	24.655244703903676	24.737948047057422	24.71236442317784	24.67795587549459	24.54430786403126	24.50170119816764	24.58333239102045	24.52617478086449	24.46272460223137	24.62253428823158
Con_Pmod_vs_Con_Scr	G5EA09	SDCBP	0.10287649415511524	18.047434072578042	1.9695512428993767	0.076173	0.6081814168775354	-4.27172	17.886138284882836	18.01957215820948	18.04682189833421	18.06894997297778	18.09665841251957	18.095553438394525	18.030795297351276	18.159835390072267	17.979639439935042	18.053182765269916	18.12135724671837	18.01070456627121
Con_Pmod_vs_Con_Scr	G8JLA2	MYL6	-0.015463	17.614259475628387	-0.139503	0.891725	0.9763925020716006	-5.9241	17.83714966475734	17.497144334208684	17.421202544398618	17.39748278660222	17.596100218934087	17.715524413053878	17.643294959680688	17.382860196929656	17.509680816015294	17.831281794593412	17.744663560320646	17.794728418046105
Con_Pmod_vs_Con_Scr	H0Y2V6	CEP170	0.023169190002249707	13.746126120070725	0.4706694471424453	0.6476200043219714	0.9172073045805539	-5.82219	13.812136737177669	13.783743489706028	13.71916863753826	13.793037354159866	13.853634209643667	13.73788487062517	13.609943099981368	13.55304758179726	13.716873138330396	13.794168576826271	13.723153422309052	13.856722322753688
Con_Pmod_vs_Con_Scr	H0Y3K4	RBM33	0.0974845	12.004398381728272	2.192820552185264	0.052149589470914234	0.5584090077382533	-3.94655	11.914335641758845	11.935614107209208	12.055978981061422	12.149491085667991	12.029275679162192	12.019615587592565	11.970002931930829	12.061506691405445	11.990575633792664	11.969751527897133	11.989813824483846	11.96681888877713
Con_Pmod_vs_Con_Scr	H0Y626:O95361:Q309B1	NA:TRIM16:TRIM16L	-0.0765964	25.458142277409475	-2.75134	0.019801839203820098	0.48738107063029024	-3.09621	25.602907482075068	25.58630875129129	25.551249504867464	25.46824631170364	25.49087481528788	25.551555507761226	25.39034654582336	25.37282338830915	25.391250196520943	25.381676062878626	25.39120801428156	25.31926074811348
Con_Pmod_vs_Con_Scr	H0Y6A0	ARFGAP3	0.0202238	20.657162122559047	0.4677246393040089	0.649656	0.9179029189420586	-5.82357	20.01477043606634	19.877191444067257	20.02432800428698	19.98214538084788	19.974965215502017	20.019850622365457	21.528456598587997	21.513138528979404	21.39938701078234	21.1856	21.20220295999107	21.163924528290742
Con_Pmod_vs_Con_Scr	H0Y720	TNRC6B	-0.0128784	12.682329933630445	-0.244634	0.811512	0.9622057408730721	-5.90356	12.410430268913906	12.622620569132174	12.602262606376204	12.59265604361482	12.52131723743271	12.48270509913518	12.783228741920832	12.847834883618162	12.809942240976987	12.80554849076372	12.886903789265345	12.822509232415308
Con_Pmod_vs_Con_Scr	H0Y7W6	FNBP1	0.00797264	18.138803296326735	0.184363	0.8572839849824043	0.9700238487574436	-5.9167	18.17296964427505	18.231328211786355	18.181086838503248	18.252767749247685	18.204935951014335	18.15159891335608	17.967573916349867	18.05443450347445	18.06323815770375	18.124072180283964	18.051240619322144	18.210392870603915
Con_Pmod_vs_Con_Scr	H0Y858:Q6IBS0	NA:TWF2	0.00402312	20.735402833888138	0.1507142195404736	0.8830923392114489	0.9760192068290906	-5.92244	20.681663939122092	20.759973694061745	20.741381178639692	20.756727157435854	20.71783675238279	20.7205	20.728833495831037	20.807389692047472	20.77270655660895	20.712894276052342	20.71460017785849	20.710302836048584
Con_Pmod_vs_Con_Scr	H0Y867	GOLGB1	0.0324889	15.898274240428423	0.7602979598927312	0.4640103173002236	0.8479055457704144	-5.64738	15.825661140234896	15.849792214324072	15.842637620398156	15.889112893399236	15.785332653512167	15.941112084184256	15.94393751915444	16.044956297165417	15.961335270835162	15.925021610852305	15.934913385873124	15.835478195207832
Con_Pmod_vs_Con_Scr	H0Y8H4	NEDD4	0.10434025534895142	12.756853890248681	2.017322640520057	0.0702872	0.5968378965966202	-4.20322	12.587337604627916	12.570835032004016	12.66467181744108	12.786959052088976	12.620590719921616	12.728315448109266	12.949367436345256	13.001093002298122	12.8262	12.75657192011688	12.767325325165691	12.822932593284849
Con_Pmod_vs_Con_Scr	H0Y980:P52435:Q9GZM3:Q9H1A7	NA:POLR2J:POLR2J2:POLR2J3	0.0419646	17.155450680832416	1.1739217068996048	0.26667928682480857	0.7470827452808014	-5.27636	17.11724744091741	17.13974354109808	17.16028901972912	17.194038459613953	17.19365072274408	17.155484559868718	17.106171867473584	17.186951376547146	17.242119484043595	17.15470958349945	17.149040478313857	17.065961636139985
Con_Pmod_vs_Con_Scr	H0Y9Z7	KIF13A	0.0068811	16.862218277232525	0.17921034035403027	0.8612254462808813	0.9707188763518168	-5.91765	16.7289	16.662090308323183	16.641070336555046	16.71404641362477	16.648406110101988	16.69023343855422	17.078614267600045	16.940580757068496	17.072577977433877	17.048060404333675	17.04437280435899	17.077684494539895
Con_Pmod_vs_Con_Scr	H0YA96	HNRNPD	0.082927	10.270633020172513	1.1422342567864912	0.2790416024298818	0.7595657707796553	-5.30925	10.05049475970712	10.253407993477666	10.22186424860116	10.359072945137072	10.18847945753454	10.226995618081109	10.357763774662846	10.523638482761486	10.3132	10.2021	10.20360325942531	10.347020045134546
Con_Pmod_vs_Con_Scr	H0YAC5	REEP2	-0.0106666	13.637257951922054	-0.182298	0.8588631057186151	0.9700238487574436	-5.91708	13.694770574712656	13.814282859410495	13.626034045057086	13.656846445532118	13.789205006432567	13.657036165416816	13.566564007451916	13.471913097373612	13.633177819638751	13.554962007124644	13.53749553085096	13.64480786406302
Con_Pmod_vs_Con_Scr	H0YAE9:O00584	NA:RNASET2	0.0236354	20.641899350882976	0.5043302047254209	0.624571	0.9092250255657002	-5.80584	20.7188	20.767350374212064	20.80720948883705	20.76176905832664	20.763971769922144	20.838516958628496	20.50778073675561	20.531039787872867	20.422017584300164	20.52755954361563	20.61825268834809	20.438532490123848
Con_Pmod_vs_Con_Scr	H0YAH3	GALNT7	0.033479656384383105	15.00493936220988	0.4366907659001264	0.6712875433104969	0.9244343275106786	-5.83761	14.979925907813993	15.177107848327116	15.164540923916672	15.26871200678366	15.002143147086226	15.151158495341026	14.747654033211246	14.946778105304114	14.866932827419497	14.927510905047788	14.9745	14.852293120811323
Con_Pmod_vs_Con_Scr	H0YB92	CEP170	0.0410039	13.568164819919726	0.9159066972283978	0.3805196538373494	0.822423	-5.5233	13.565947013459883	13.53349269876939	13.574531979769391	13.672477745971836	13.605853919454152	13.51865185796911	13.458432859981306	13.41451626921352	13.495678951177505	13.63703840044774	13.597875522268875	13.743480620554012
Con_Pmod_vs_Con_Scr	H0YBJ8	MTDH	0.0292314	15.323355335910154	0.6690980964476418	0.5180497312777318	0.8651318682054947	-5.71058	15.334114375760908	15.200588702286302	15.24617510884323	15.330317176429055	15.2846	15.253662578260275	15.337796870861986	15.256070025109294	15.398131421073632	15.42238636849483	15.36627100475801	15.450157774666623
Con_Pmod_vs_Con_Scr	H0YBP7:Q96JY6	NA:PDLIM2	-0.0147303	23.423279528638503	-0.536685	0.6028073725629275	0.9009596399648678	-5.78911	23.4651	23.453	23.39528243654108	23.378443088218695	23.458518322356547	23.432250053123205	23.38043922449782	23.38182898267327	23.391467646096316	23.454847074548667	23.41434763354423	23.47381000679131
Con_Pmod_vs_Con_Scr	H0YBR0	TRAPPC9	0.0836262	11.901396462914517	2.0449655569893475	0.0670796	0.5936548081580733	-4.1633	11.875234531552866	11.805060307159426	11.83753227461443	11.940973887284867	11.967559366534095	11.860172506670173	11.897606599931985	11.930911670765411	11.982656329889029	11.916786702596465	11.831233593637425	11.971029784338038
Con_Pmod_vs_Con_Scr	H0YD56:Q9BQB6	NA:VKORC1	0.0203618	20.318817843962133	0.6655742085466996	0.5202109283359447	0.8660032077894092	-5.71288	20.374751402309993	20.325572401990975	20.33097841801576	20.36189819018281	20.359959514525855	20.37052995469175	20.31887880964536	20.324077446479905	20.4145	20.24786284167849	20.229628573773084	20.167202936634517
Con_Pmod_vs_Con_Scr	H0YDN1	PLEC	0.00282083	19.34466488890199	0.0629815	0.9509786083047307	0.9877182362068813	-5.932	19.324570790169904	19.392383655705245	19.290863326457465	19.405988436895484	19.297639012456532	19.31265281655746	19.276597205724272	19.30046671293289	19.379979563153103	19.37830408532017	19.319868250222903	19.456664811228435
Con_Pmod_vs_Con_Scr	H0YEF7	PICALM	0.010571343592271631	22.364524513414803	0.3526363879617501	0.7314227199328036	0.9380258908229138	-5.87094	22.429835060597032	22.4262	22.43634989069452	22.43861491119176	22.494484571111137	22.39101342177304	22.229329095854812	22.268786918635342	22.31763293738387	22.32561448196452	22.28867309460564	22.32774585515837
Con_Pmod_vs_Con_Scr	H0YF21	MAP7D1	0.0718096	16.515045909340262	1.7061441963744897	0.11770107058128103	0.6665809340429043	-4.63609	16.42910581276643	16.424326108438535	16.49079553466363	16.53533134183796	16.46032700868058	16.563998027025693	16.538088826719544	16.652977931529676	16.520750399135437	16.542235358163836	16.558357176961547	16.46425738616029
Con_Pmod_vs_Con_Scr	H0YGH8	PPFIBP1	0.13136291705203185	8.85346	1.3789871943771486	0.1969107450411779	0.721058	-5.04802	8.946094831662087	8.881715140638104	9.189432708207814	9.22338	9.179966855234657	9.007985541955616	8.331410354355864	8.594036651511647	8.560882507323534	8.836075744841889	8.824176161020835	8.666404237930099
Con_Pmod_vs_Con_Scr	H0YGQ3	MPDZ	-0.193634	1.5926729774054484	-0.78651	0.44916730768787105	0.8467399984018738	-5.62788	2.153235082926649	1.366992560668313	1.356943868499732	1.257303919729253	1.4878620787409955	1.551102458668689	1.8100132714785229	0.8933241112384849	1.4287443597468616	1.909439699565615	1.792328445907362	2.1047858716949026
Con_Pmod_vs_Con_Scr	H0YHD9	KRT72	0.0475215	19.494874723901287	0.16669773791797704	0.8708132760715649	0.9725859869413802	-5.91986	20.0165	20.1296	20.0806	20.43082633772518	20.30280971225984	19.635661793109133	18.38098614081016	19.015040847258092	19.294901654115343	18.942586922404764	18.38232692319179	19.326623121074725
Con_Pmod_vs_Con_Scr	H0YHG0:P82979	NA:SARNP	-0.0040729	16.811711456636562	-0.118857	0.9076594721783748	0.9806197913976971	-5.92681	16.824985684406574	16.769797281643555	16.801434615532465	16.741951425197012	16.818295748532254	16.82375169721972	16.797240429749184	16.751027466585246	16.774843905482008	16.896303269412932	16.931084344156922	16.80982161172089
Con_Pmod_vs_Con_Scr	H0YIN7:Q9UQ80	NA:PA2G4	-0.0217774	21.34656011330315	-0.680424	0.5111397684644647	0.8619003566198508	-5.70313	21.42334358843754	21.358477034114845	21.337860558656995	21.36452400730635	21.34963434123632	21.3402	21.31703527391829	21.30888163122473	21.384334844753127	21.339251520736468	21.271616613716763	21.363571284556375
Con_Pmod_vs_Con_Scr	H0YIZ8:Q8TC12:Q96NR8	NA:RDH11:RDH12	0.0723223	18.561392609166376	2.725476995303955	0.020715259122659698	0.4900442998239445	-3.13619	18.558123696384012	18.46929461560389	18.56365557167905	18.592	18.631437103234163	18.584639233076416	18.531684959962416	18.52986886462874	18.509149227180483	18.596064239220304	18.586978802182205	18.583850543188213
Con_Pmod_vs_Con_Scr	H0YJH7	TMPO	0.0896337	6.257350225178081	0.9063621745959838	0.3853181335837166	0.8232706972852815	-5.53148	5.843181814908082	5.792981998185893	6.05134	5.928627505302501	5.992164156203542	6.035614872830122	6.666432579227637	6.730529217597394	6.524874636959021	6.5312781176150905	6.698245571478075	6.292930708020672
Con_Pmod_vs_Con_Scr	H0YJZ4	STRN3	0.028425497599297245	13.24740558690795	0.4708403221722847	0.647502	0.9172073045805539	-5.82211	13.243144271330266	13.326178526047652	13.285473033379798	13.37325386117232	13.27412842418359	13.292690038199696	13.12664140198142	13.29615709350317	13.129943498838053	13.188851286177629	13.10501698748238	13.327388620599423
Con_Pmod_vs_Con_Scr	H0YL38:Q6N043	NA:ZNF280D	0.012608292340512861	10.523469319456071	0.4304216652831813	0.6756965380160046	0.9245835873384326	-5.84033	10.464820329331582	10.431129760897562	10.492701145891276	10.445467113624264	10.507234006046296	10.473774993471384	10.5744	10.617596435368489	10.510969926539918	10.58642177707683	10.581656308754344	10.59547845217841
Con_Pmod_vs_Con_Scr	H0YNA2	SPPL2A	-0.0130248	22.393998585714094	-0.334868	0.7443994316938785	0.9427645100362444	-5.8771	22.44118702370387	22.47748243603241	22.35736539236587	22.427457328766327	22.400953340012197	22.40854967025012	22.438723625963625	22.384274032843656	22.475086460509644	22.292589305677065	22.25110681445533	22.37320759798903
Con_Pmod_vs_Con_Scr	H3BMM5:Q96AX1	NA:VPS33A	0.012632926615108175	21.86224078511065	0.43006984906173973	0.6759443484409974	0.9245835873384326	-5.84048	21.8054	21.85846832283553	21.895097510944332	21.910735966333213	21.840550731159635	21.84554034744714	21.87301784730308	21.88056516448719	21.827539559902036	21.844796006679307	21.883356196786988	21.881859336134553
Con_Pmod_vs_Con_Scr	H3BNC9:P08708	NA:RPS17	0.0435495	20.36756124676745	1.2833701673218836	0.22729685524999085	0.7387203027034835	-5.15771	20.398473113510175	20.31122251163129	20.36808161626812	20.459990482589777	20.35295122133291	20.39548390412509	20.328226870748153	20.367963308756483	20.363333697904377	20.367851160901488	20.30792892681513	20.389228146626404
Con_Pmod_vs_Con_Scr	H3BNI4	ATP6V0C	-0.078327	18.43930634638584	-0.782619	0.4513509371383536	0.8476241846417576	-5.63081	18.67420759680277	18.539031503637407	18.285050995609968	18.29696012761687	18.46419370809075	18.50215539289931	18.24568547072597	18.254956052089625	18.43617465914311	18.602431458750903	18.39046686367785	18.580362327585537
Con_Pmod_vs_Con_Scr	H3BNX3:Q9Y6N5	NA:SQOR	0.0123324	29.369365847201962	0.35754386765864393	0.7278540490327373	0.9372527604391676	-5.86918	29.771380711769524	29.716724965267225	29.80011014702732	29.794306501658543	29.72122838676856	29.809678222432645	28.94718784543022	28.94219749865147	28.896	29.018842502472975	29.05779010513348	28.95689336570048
Con_Pmod_vs_Con_Scr	H3BQ06:Q9ULP9	NA:TBC1D24	-0.00495525	16.452572564480835	-0.131814	0.8976533076776168	0.9773147215974144	-5.92516	16.411128149306233	16.4096	16.404480436219334	16.383763394543905	16.437148737338415	16.389463546457943	16.376054806339628	16.508467176773596	16.406999846136753	16.58060942713316	16.50359621431827	16.619526204138467
Con_Pmod_vs_Con_Scr	H3BT57	PML	0.0625557	18.547475141533038	1.265622401156692	0.23334131566778563	0.7387203027034835	-5.17747	18.465376877333856	18.549316453261383	18.62735038849229	18.60682466521127	18.61813809377987	18.6047	18.483777997750423	18.601515076281267	18.42029276019848	18.521027176705417	18.58060659857927	18.490727487089135
Con_Pmod_vs_Con_Scr	H3BTX0:Q9BTK6	NA:PAGR1	-0.252553	2.5078636283796727	-4.71997	7.391075853936901e-4	0.20556353279186576	-0.196608	2.539083951601672	2.5196209902240323	2.498027581461118	2.187025534087132	2.3179737164164553	2.294072798116087	2.760181163676279	2.576178142976385	2.5454821776282444	2.57206	2.638538932125357	2.6461184127597086
Con_Pmod_vs_Con_Scr	H3BU16	JPT2	0.017073505795083932	11.528903311227298	0.22953502602354348	0.822917	0.9651990519855032	-5.9072	11.6281	11.34891260446691	11.444288910212514	11.522289700264794	11.402207433963472	11.548020130975612	11.663442563234328	11.440010903800946	11.505199036658324	11.605635065225403	11.577721708831708	11.661016443954352
Con_Pmod_vs_Con_Scr	H3BUA5:P78324:Q5TFQ8:Q9P1W8	NA:SIRPA:SIRPB1:SIRPG	-0.0316202	29.497506996366553	-0.385987	0.7073061265162046	0.9325590471189777	-5.85854	29.63715656619224	29.48407679911498	29.441665924596645	29.52685472071938	29.518704061402765	29.4225	29.35396738668811	29.320738677637937	29.466737112784212	29.60667408840254	29.420828189861023	29.770200420230204
Con_Pmod_vs_Con_Scr	H3BUF6	ATXN2L	-0.0158594	12.497895244801512	-0.418688	0.6839832128399701	0.9269047527617018	-5.84532	12.567697841970894	12.543420307455357	12.550564127538731	12.599455942413671	12.48605671247704	12.528591518437338	12.531775983754148	12.446945803961762	12.459195025831226	12.386227878349985	12.383504993286804	12.491306802141183
Con_Pmod_vs_Con_Scr	H3BV83:Q8IZQ5	NA:SELENOH	0.0435938	16.017983919712613	0.883472	0.39699844035455367	0.827785	-5.55079	15.92190378359195	15.94623843304512	16.05856478384956	16.054060564614023	15.965850449798836	16.037577328172503	16.082431550261518	16.148569612651574	16.03273749818578	15.990768034625855	16.067319069619067	15.909785928135571
Con_Pmod_vs_Con_Scr	H7BY82	COL5A1	-0.115066	11.989305654004875	-1.69633	0.11958649582874975	0.6668705767391456	-4.64916	12.06352715884824	12.293918265652454	11.994356315074274	11.907847248049617	12.072770067264909	12.025986158798798	11.882178941319603	11.85681168490742	11.916824286165784	11.931714886223462	11.933000606157862	11.992732229596086
Con_Pmod_vs_Con_Scr	H7BYZ3:P63098:Q96LZ3	NA:PPP3R1:PPP3R2	-0.0352793	19.076645591294085	-1.16709	0.2693065050180237	0.7488342787165227	-5.28351	19.117494533092636	19.148896598584574	19.10824162499919	19.040761211689485	19.09092948310189	19.13710406661824	19.044766205133648	19.03436029130907	19.00687686047673	19.06872452474555	19.10646007572451	19.01513162005348
Con_Pmod_vs_Con_Scr	H7BZB9	MAP2	0.12304792174472468	16.6943	3.6409711568779133	0.00426813	0.35955570409741777	-1.73119	16.714265850294872	16.594624109907844	16.67581205853838	16.795538846879015	16.741422257479467	16.816884679616784	16.62350987153813	16.562783799855204	16.54694950828767	16.75642053331195	16.764447857386205	16.739338471873307
Con_Pmod_vs_Con_Scr	H7BZD4	ITSN2	0.052284838060096206	12.104002871721407	1.339628364602058	0.2089811026602545	0.7293819180839909	-5.09382	11.925950841946625	11.952967142991351	11.96838522171703	12.061113058169129	11.940589769321583	12.002454893344584	12.202606557627238	12.232546095099146	12.127714125688389	12.249495819017875	12.243200243131596	12.341010692602334
Con_Pmod_vs_Con_Scr	H7C004:P05120	NA:SERPINB2	-0.209252	20.8007	-0.429514	0.6763358540444048	0.9245835873384326	-5.84072	21.845852458941792	21.682286839729286	20.772018560250093	21.486210518657114	21.39860661492513	20.787584740192543	20.234018764584313	19.604277499543446	21.33190371209318	20.1468	19.38472598069786	20.934230442549868
Con_Pmod_vs_Con_Scr	H7C0I5:Q9Y697	NA:NFS1	0.0297946	21.580165930366498	1.6019561851903046	0.13915541790661554	0.6853321066323252	-4.77282	21.628698482346497	21.613920112267188	21.642643334586737	21.666316292860603	21.64197097097748	21.6664	21.50589333277281	21.49328436708848	21.46944706211403	21.53972136925761	21.556067491483933	21.537669835741927
Con_Pmod_vs_Con_Scr	H7C0W7	HYCC1	-0.0135835	18.804916742115388	-0.500529	0.6271534677881943	0.9092250255657002	-5.80774	18.74229411222734	18.7537	18.794207537654067	18.758561999942668	18.75697821050711	18.73390160658391	18.83062911240104	18.877344456523105	18.782399286216425	18.862742106549085	18.859479599310163	18.906772190575133
Con_Pmod_vs_Con_Scr	H7C144	ACTN4	-0.0581123	16.90527283216808	-1.44273	0.17860897217996777	0.7117868613415159	-4.97198	16.916497062392818	16.982682707039988	16.91654514195569	16.80603709962517	16.89409093779341	16.941260110749397	16.964429748515713	16.96332367555293	16.91158880311896	16.860139388362978	16.914008528774207	16.7927
Con_Pmod_vs_Con_Scr	H7C1Q1:Q9BXI6	NA:TBC1D10A	0.0229089	21.94154499242548	0.5956269286881719	0.5641959249942109	0.8865401293506525	-5.75613	21.943052091652365	21.91688985635226	22.051752357491686	22.03844048160237	21.972801393990306	21.96917902984189	21.89744503151224	21.970298377813297	21.868367686471142	21.888335404091773	21.90743135618645	21.87454684209998
Con_Pmod_vs_Con_Scr	H7C1U3	CC2D1B	-0.00276843	13.506950295559049	-0.0625553	0.9513098950993181	0.9877182362068813	-5.93202	13.518788356829925	13.332699218772053	13.443019572321402	13.403910180458327	13.464514891442736	13.417776775196842	13.55253055102213	13.554864278917613	13.626023096775748	13.636656989220864	13.58156052972502	13.551059106025932
Con_Pmod_vs_Con_Scr	H7C1W4:Q93075	NA:TATDN2	-0.0264687	18.00220430950122	-0.395742	0.7003145060211207	0.9313927082650366	-5.8547	18.06783706097108	18.115604350774092	18.0678	18.182318305374864	17.86024394753566	18.12928965040357	17.836824312516576	17.831334323439947	17.877784243814702	18.024376477051263	18.05781989163229	17.975202485898585
Con_Pmod_vs_Con_Scr	H7C2K6	EPB41L1	-0.0599631	17.630733221580343	-0.692994	0.5035360322155044	0.8605521265437722	-5.69472	17.733389070053402	17.776519710404497	17.547583093889017	17.59521123460477	17.71898195817409	17.563409454368088	17.497859183532544	17.32713322254427	17.636738460691216	17.708544066296867	17.62869985443025	17.83472934997512
Con_Pmod_vs_Con_Scr	H7C417:O76054:Q9UDX4:B5MCN3	NA:SEC14L2:SEC14L3:SEC14L6	0.0807568	18.778213602825915	1.9673525802206784	0.0764547	0.6083160635977397	-4.27485	18.785045565121237	18.813831652510235	18.893486259502712	18.898137493709005	18.911203058521696	18.92529345461197	18.679006507259853	18.682890503174253	18.578393415154785	18.71042405952213	18.79585653124557	18.66499473357753
Con_Pmod_vs_Con_Scr	H7C4K7:Q5SRE5	NA:NUP188	0.058606416298147224	21.051584111353208	1.8349961710368596	0.0953158	0.6431153643512275	-4.46089	20.984341313899108	21.006218021794552	20.992602217335364	21.07743277357013	21.045519297422143	21.036028730931186	21.043241071525056	21.115054108202575	21.179685687735443	21.074424188347496	21.047964151328248	21.01649777414718
Con_Pmod_vs_Con_Scr	H7C4T5	MBNL1	-0.00569962	16.268588479358044	-0.184938	0.8568440410263721	0.9700238487574436	-5.91659	16.206971915202114	16.265830793862758	16.291345918395194	16.258942064658505	16.272617731980738	16.215489968650665	16.297406025200633	16.37602167771019	16.2881	16.237638065485104	16.238123907198705	16.274606159291043
Con_Pmod_vs_Con_Scr	H8Y6P7:P0CAP1:P0CAP2	GCOM1:MYZAP:POLR2M	0.030456166386624517	18.168159068425243	0.8045066779661867	0.43915722012827174	0.8413925721131803	-5.61416	18.12246048556245	18.100381454968534	18.20216857704401	18.207047623137345	18.1274	18.181957936414225	18.17802789591234	18.22833273395032	18.094119639249698	18.182618235325013	18.20744837650532	18.18597240585038
Con_Pmod_vs_Con_Scr	I3L0L0	RUNX2	0.022861037689217767	21.085518182333402	0.2906833102882296	0.7770236076413619	0.9541895079314293	-5.89107	20.955736794062105	20.98003880345583	21.15598571196073	21.072995270961165	20.996996144304564	21.09035300728058	21.08092553149543	21.24842313663929	21.060834733780215	21.158258952022745	21.256241968703208	20.969428133334983
Con_Pmod_vs_Con_Scr	I3L521:Q9Y580	NA:RBM7	0.00285813	12.15006538656795	0.13925561470131667	0.8919153505873014	0.9763925020716006	-5.92413	12.13033053500718	12.103815177120332	12.120018231137308	12.12252740749475	12.134994222522703	12.105216704687976	12.2018	12.229475997555731	12.213890614531485	12.149266769609484	12.115850569431506	12.173574301360052
Con_Pmod_vs_Con_Scr	J3KP58	CLIP1	-0.0281988	17.26163030486823	-0.538185	0.6018077716719235	0.9004320826151885	-5.78831	17.367661860376295	17.370797245154886	17.218147245439877	17.273614418496546	17.315392984974707	17.283002660640914	17.17656724814138	17.127399259950483	17.26091612740676	17.251382050239023	17.164545153849062	17.330137403748832
Con_Pmod_vs_Con_Scr	J3KR12:Q96C36	NA:PYCR2	0.028375851798898566	22.97044392257018	0.7427876829745352	0.47409908642255627	0.8506867547580212	-5.66007	23.0511	23.041916541033952	23.005513532915415	23.040488955881944	23.057260018457725	23.0859	22.840035984267704	22.923856248916135	22.9809	22.9229	22.886515223721037	22.809031186134145
Con_Pmod_vs_Con_Scr	J3KS54	FLII	-0.035788	17.072275299704863	-1.26931	0.2320735419581934	0.7387203027034835	-5.17338	17.168540952124108	17.109585663782177	17.084623852841126	17.0706	17.07681706043339	17.108003889674094	17.069704677910035	17.06529081728204	17.049154564225898	17.026759164438797	16.975019158215652	17.06323820313585
Con_Pmod_vs_Con_Scr	J3QL48:P40306	NA:PSMB10	0.016497543339649923	23.051677968483656	0.11902680269112004	0.9075282025301195	0.9806197913976971	-5.92679	23.067964265241656	23.090835592103833	23.304042158917937	23.132344072510396	23.03659867158097	23.343391902191016	23.02838329987357	23.10617128471419	22.754337019942188	22.933	23.179264492188707	22.643780555812494
Con_Pmod_vs_Con_Scr	J3QQQ9:P61254	NA:RPL26	-0.00943919	21.450004369080578	-0.18838	0.8542143392036108	0.9700238487574436	-5.91594	21.55695331840979	21.478884824645363	21.39630559798918	21.414718882358233	21.510109814269633	21.47899747724304	21.414887807989047	21.39463571254315	21.550618339004643	21.445324114825752	21.364462010976553	21.394154528712555
Con_Pmod_vs_Con_Scr	J3QQX3	FDXR	-0.0111832	18.867219929805138	-0.335319	0.7440686564788991	0.9427645100362444	-5.87695	18.884084048231404	18.97177384028275	18.937286850394464	18.89423578522848	18.91468367571931	18.950675779684957	18.831489442276187	18.864705826062224	18.82454484216603	18.78114682983117	18.83577086248949	18.71624137529517
Con_Pmod_vs_Con_Scr	K7EK78:Q86Y39	NA:NDUFA11	0.019422272236518268	18.985420470819005	0.6295396520919766	0.5426148421937118	0.8784133715840827	-5.73571	19.04021208410722	18.947807606357173	19.00734025612468	19.004148273417645	18.985767932569072	19.06371055731191	18.9793	18.982543635166316	18.926314463745417	18.97893159170426	18.977147662136534	18.93186550693883
Con_Pmod_vs_Con_Scr	K7EKI1	RHBDF2	-0.0417598	17.40033833264503	-0.38038	0.7113383084164819	0.933715	-5.8607	17.367210380669523	17.384058081477594	17.433856851289953	17.22167975072143	17.336389504306144	17.50177671586179	17.521054845750168	17.39773028490657	17.31555673435821	17.453473288228665	17.680736810162777	17.190536744007538
Con_Pmod_vs_Con_Scr	K7EKQ2	CDC37	0.027346317230684036	20.23232081203052	1.1002455656561296	0.296107	0.7707078288811412	-5.35177	20.19929749371085	20.236996601576234	20.23300985816051	20.2961	20.21044725526318	20.244796381231367	20.207517150429027	20.25232996541108	20.229926898217293	20.221757028166103	20.21512416680229	20.240547676753177
Con_Pmod_vs_Con_Scr	K7EKS7:P35268	NA:RPL22	-0.0213629	21.54305233019377	-0.476964	0.6432791207740152	0.9158419200447032	-5.81922	21.66786537575606	21.58853294359141	21.534388127179337	21.53733636861764	21.60363669753536	21.585724676794605	21.46390608835522	21.3882	21.558779040641912	21.560459300039984	21.521086001801756	21.506702701715355
Con_Pmod_vs_Con_Scr	K7EL81	PPP1R12C	0.055602220071040875	16.335005882603213	1.4382831400233111	0.17983792982117713	0.7121743384374237	-4.97736	16.246076580839755	16.28190554640291	16.313663446339202	16.349368945248784	16.4048	16.25426561595672	16.331903144099904	16.302161192064037	16.40345718709877	16.36833223784321	16.39029806584113	16.37382095691462
Con_Pmod_vs_Con_Scr	K7EMQ3	DNM2	-0.159913	18.548807663116833	-2.53213	0.029011984660493623	0.5084436347853483	-3.43392	18.55644596461896	18.612537917843465	18.46850477179304	18.290361274131804	18.484498095875104	18.382889726907447	18.74594397541411	18.52158480867464	18.644	18.58123128519564	18.630470431080088	18.66721533413372
Con_Pmod_vs_Con_Scr	K7ENF0	NARS1	-0.0591735	17.143573528794132	-1.59422	0.1408784815001706	0.6881926499769561	-4.78278	17.101066972562666	17.210540138782658	17.228038475184444	17.13872864946446	17.162871246943517	17.0605	17.11856724439011	17.17482389609376	17.162959170050325	17.108341448956416	17.144503336166334	17.11191663093638
Con_Pmod_vs_Con_Scr	K7EPI4	GFAP	0.00867772	26.440138037561812	0.060125452341357036	0.9531986026329797	0.9877182362068813	-5.93218	26.53640964193516	27.083414028862595	26.83580552995057	26.90446851221467	26.949746453161676	26.627447396966737	25.88605655217004	26.067855764960555	26.33970949066299	26.00452476326523	26.072805649214793	25.97341266737675
Con_Pmod_vs_Con_Scr	K7EPS4	MXRA7	-0.0554796	20.740345272517803	-1.55889	0.14899212698673375	0.694261	-4.82792	20.77009529355854	20.8092	20.79268911446856	20.718417785297017	20.71769610607475	20.769426957418627	20.674554866879753	20.733611801954577	20.5786	20.758779209300947	20.758915786466083	20.8021
Con_Pmod_vs_Con_Scr	K7EQ44:P29317	ELOF1:EPHA2	0.00157259	22.288949020020286	0.0345958	0.9730588713029327	0.9911706256256181	-5.93341	22.2455	22.36436981137494	22.250469146100667	22.219603871993808	22.393996367780623	22.25145704387249	22.22479090555032	22.23485752619607	22.27993610066447	22.326821813319224	22.324309683582236	22.351275408063685
Con_Pmod_vs_Con_Scr	K7EQG2:Q8IY67	NA:RAVER1	0.012816895669550021	15.61689795781328	0.31446724197406273	0.7594014280941821	0.9481419578342523	-5.88379	15.532920452235498	15.614423204004847	15.631548843680482	15.686670186760814	15.524161490371384	15.606511509797286	15.651619202982513	15.713629742578028	15.67788198110963	15.581458845736533	15.617432634404292	15.564517400098042
Con_Pmod_vs_Con_Scr	K7ER90	EIF3G	-0.0831554	17.846015914850387	-0.87703	0.4003299489633728	0.8282689998888321	-5.55615	18.118624295049603	17.91312511829019	17.85028033107105	17.7465	17.899907291080744	17.986129810111656	17.845853716608204	17.560560475531634	17.543859743914837	17.86299677975516	17.84860402884596	17.97572291122052
Con_Pmod_vs_Con_Scr	K7ERI8:P51148	NA:RAB5C	-0.0141974	23.085098961351633	-0.408892	0.690935	0.9277709244899366	-5.84939	23.2173	23.171087793014067	23.09568786446751	23.087077112252693	23.167956245408533	23.186414994221067	22.989644934874978	22.96338577160625	23.00943141049903	23.065223688541945	23.023106737767595	23.04490606261772
Con_Pmod_vs_Con_Scr	K7ERU9:Q2NL98	NA:VMAC	0.12358618355330364	11.425295229459392	2.352430150242177	0.0396233	0.5358613997467039	-3.70754	11.32304741296107	11.243222608199662	11.337710232416544	11.521966929422398	11.321709514653245	11.431062360161553	11.640936200440787	11.574540689649954	11.512928699319406	11.364014522676786	11.371708102291068	11.460695481320224
Con_Pmod_vs_Con_Scr	K7ES63	TUBB6	-0.0287758	17.69491285856512	-0.467284	0.6499604917153816	0.9179029189420586	-5.82378	17.8281	17.657287740428142	17.689393031207423	17.622790823838027	17.720533141194274	17.745159070976023	17.7017	17.565395460171647	17.490061902699676	17.751996048937887	17.72505978821484	17.84140576941624
Con_Pmod_vs_Con_Scr	K7ES69	CNN2	-0.169603	18.033938259170032	-1.90076	0.0854624	0.6250294302220653	-4.36916	18.43229050989367	18.198333183522102	18.14138856011141	17.984497370812093	18.074135731879625	18.20456954289912	18.100820996978484	17.940177154269993	18.170596654131188	17.79590154229483	17.75848924300797	17.606058620239896
Con_Pmod_vs_Con_Scr	L0R6Q1	SLC35A4	0.17979044991689008	23.90102850327814	2.1003552524175753	0.0610641	0.5773481456909524	-4.08271	23.87184504793948	23.95204244109907	23.81643261004748	24.032443212379093	24.0199	24.12731575297549	23.706495360875024	24.04139394205947	24.02899184974081	23.84672713982161	23.731431538369804	23.63729066054826
Con_Pmod_vs_Con_Scr	L0R819:U3KQP1	ASDURF:NA	-0.0106658	19.604311315299924	-0.328823	0.7488333610132518	0.9446365168739791	-5.87913	19.5663	19.517248673441475	19.55786233577782	19.56567679663563	19.525000628686342	19.518719560722612	19.670684645752168	19.562429972904845	19.582571929747218	19.69715271149113	19.713129360391488	19.774975736910257
Con_Pmod_vs_Con_Scr	L0R8F8	MIEF1	0.10193584916433451	16.524492035148192	2.680319526001263	0.022412239502313476	0.492772	-3.20594	16.468104575180046	16.39704846997916	16.426828427031413	16.487347535512445	16.541632576525657	16.56880890764551	16.587416922011233	16.689101515110845	16.662100976122822	16.54117175509543	16.501667122194497	16.42267563936926
Con_Pmod_vs_Con_Scr	L7N2F9:P63027	NA:VAMP2	0.0204683	20.25314188597339	0.6915340621804629	0.5044157381973049	0.8605521265437722	-5.69571	20.28287366070553	20.341584502399137	20.294775969687333	20.342000334019545	20.3443	20.29434892497327	20.160016735071327	20.219290925152556	20.266820914544148	20.173234310427112	20.14234559026488	20.176121088611502
Con_Pmod_vs_Con_Scr	M0QX46	CRTC1	-0.0435953	17.497947482709268	-1.06862	0.30948199270087146	0.7737049817521786	-5.38297	17.42345516529264	17.41905341367958	17.374042153073567	17.389171180854515	17.369571817295597	17.32702184942068	17.691249437353854	17.580396090886715	17.658333584135992	17.546183161803068	17.526373777232585	17.670518161482406
Con_Pmod_vs_Con_Scr	M0QYU9:Q9BQ49	NA:SMIM7	0.2903178822736301	18.257445957263062	3.27599	0.00796133	0.39476914806903657	-2.28555	18.104459021784663	18.26243390275271	18.344389532579964	18.639511205211154	18.469000866811875	18.473724031915193	18.041889208602495	18.410980042687388	18.22289777799205	18.069957437357395	18.039482514245435	18.01062594521642
Con_Pmod_vs_Con_Scr	M0QZM1	HNRNPM	0.017938179162095835	11.388343213963193	0.6892453406756824	0.5057965366297654	0.8605521265437722	-5.69725	11.472226797253786	11.42641234121631	11.489959510308406	11.464492271009348	11.51135338725133	11.4666	11.288735938873238	11.279777760182974	11.3072	11.331231086583951	11.347430457086244	11.27476657418864
Con_Pmod_vs_Con_Scr	M0R247	HNRNPUL1	-0.0634459	14.606398717774317	-2.32095	0.041837193916597494	0.5358613997467039	-3.75503	14.638448483373905	14.634727136883283	14.687239267323562	14.639562524483646	14.547987240663366	14.582527514762962	14.60552712692803	14.588260047039732	14.55381000577026	14.580762138206396	14.605159389433384	14.612773738423284
Con_Pmod_vs_Con_Scr	M0R296:Q96CM4	NA:NXNL1	0.0640043	16.103830560419997	1.6719950559448624	0.12438218695072009	0.6678546603679277	-4.68142	15.978476660117911	16.051210574887623	16.088325268758567	16.149188693127584	16.089272466342567	16.071564168228896	16.115660344801526	16.11059046990191	16.164938294345824	16.1372	16.206893310609733	16.08266523625353
Con_Pmod_vs_Con_Scr	M0R2C6:Q9NP81	NA:SARS2	0.00709665	19.96188920221198	0.24131437501850242	0.8140156878034561	0.9629995281532462	-5.90438	19.953491786144557	19.981269009198225	20.00101272675508	19.98339344417653	19.9544	20.019232701103913	19.98109595020637	20.008972940649432	19.91890890558272	19.90949448893412	19.94918634509647	19.88217480187114
Con_Pmod_vs_Con_Scr	M0R2N6:P18887	NA:XRCC1	-0.0345341	16.057979495568883	-1.22497	0.24768057006428115	0.7435648622388488	-5.22198	16.050268055509274	16.023886014161192	16.056104932475904	15.986246486085324	15.99191319352338	16.048497015244212	16.128771765318454	16.166935041982676	16.1046	16.063458691712963	16.078135079962546	15.996920353934687
Con_Pmod_vs_Con_Scr	O00115	DNASE2	0.21870919617863294	19.24553791663875	7.682805247362616	1.3551460509477244e-5	0.032117	2.996495407328874	19.32743878397622	19.256025406004227	19.32962928493683	19.53206178945538	19.525792148232316	19.51136712576545	18.96702981992383	18.948522095191787	19.008951335733215	19.19906945664284	19.207164133653674	19.133403620149245
Con_Pmod_vs_Con_Scr	O00116	AGPS	-0.0049518	21.107836020660923	-0.195921	0.8484579689262917	0.9699251270342056	-5.91446	21.110828893831915	21.157144880442537	21.14839070870131	21.117875461376297	21.14309927350932	21.140534353897472	21.052643016785172	21.06699557863989	21.07383597465726	21.101113307579286	21.137431821860027	21.044138976650583
Con_Pmod_vs_Con_Scr	O00124	UBXN8	-0.0448486	21.471904152041976	-0.906652	0.3851718545187317	0.8232706972852815	-5.53123	21.568701114061906	21.514771936868975	21.43627452986452	21.402442964577208	21.5448	21.437943138001508	21.45993231677757	21.44209850400084	21.54462280354109	21.45569192399719	21.36449978736485	21.491055087058065
Con_Pmod_vs_Con_Scr	O00139:Q99661:A0A6Q8PGD0	KIF2A:KIF2C:NA	0.010974824529160543	21.110647063954485	0.6296186226511846	0.5425651439046519	0.8784133715840827	-5.73566	21.114086349971508	21.090810554443973	21.0996	21.121841251664225	21.109595707215508	21.105944076746297	21.124106000271546	21.09755614167604	21.128512833427457	21.110969135678005	21.106694461092737	21.118088597643435
Con_Pmod_vs_Con_Scr	O00142	TK2	-0.0221413	19.917071549378026	-0.432532	0.6742110671561291	0.9245835873384326	-5.83942	19.895035786959067	19.957820504636864	19.988452054481147	19.866853308889397	19.94699628431299	19.96103475981963	19.91009726611924	19.946157971916655	19.872607928464088	19.898193617393655	19.991427574678333	19.770181534865255
Con_Pmod_vs_Con_Scr	O00148	DDX39A	-0.0716443	11.690951659562414	-2.4082	0.035977950727193155	0.5358613997467039	-3.62306	11.68387828815463	11.727874534681408	11.72213120719481	11.62945075988914	11.628275386785091	11.661224849152012	11.808131885679272	11.737968262653212	11.7249	11.634658824313933	11.70865355614053	11.62429000533452
Con_Pmod_vs_Con_Scr	O00151	PDLIM1	-0.0555216	23.10949152969799	-1.76794	0.10642927415957659	0.6600349394757536	-4.55286	23.128250232340463	23.07067633662826	23.07906788124385	23.00161599849771	23.01455209746723	23.095261574528905	23.222331125720324	23.182161916577936	23.14809037443035	23.13133078925357	23.14969099708713	23.090869032600143
Con_Pmod_vs_Con_Scr	O00154:Q6ZUV0	ACOT7:ACOT7L	-0.0670013	21.11001397272016	-1.65514	0.12780396349529557	0.6687490965699084	-4.70362	21.15080744513022	21.098040941223783	21.01118370398637	20.986638722233792	21.021874145645995	21.05051518662708	21.21883821928078	21.14947730856683	21.186427099677207	21.14535958642393	21.08970271331151	21.21130260053442
Con_Pmod_vs_Con_Scr	O00159	MYO1C	-0.0409773	25.857962901220887	-1.60171	0.13920920033467746	0.6853321066323252	-4.77314	25.86539602197189	25.859493656780344	25.80870936619657	25.759616161457853	25.818855498447075	25.832195610102627	25.932185385897615	25.87997201838087	25.88932470354679	25.87979158181051	25.884073996662195	25.88594081339631
Con_Pmod_vs_Con_Scr	O00161	SNAP23	-0.0659522	21.04072533741057	-2.38443	0.0374898	0.5358613997467039	-3.65912	21.227537311056413	21.19914653607728	21.15959027101452	21.071	21.161603369148327	21.155863658548032	20.918990631516177	20.91273463878609	20.929475438782433	20.935385591919655	20.91635914165286	20.901066978828354
Con_Pmod_vs_Con_Scr	O00165	HAX1	-0.022536	17.773869935128708	-0.909676	0.3836474115157489	0.8229718328203356	-5.52865	17.8469	17.769885869235992	17.80256758460718	17.789408640190196	17.760477267322486	17.8019	17.806704686940996	17.772015831207923	17.755871714885515	17.7256	17.709947985664083	17.74511339054541
Con_Pmod_vs_Con_Scr	O00170	AIP	-0.0956102	18.11305244936325	-3.51558	0.00528031	0.3731624097602041	-1.92017	18.05314924101511	18.055003902760586	18.021929461768455	17.93906322232467	17.90393829208341	18.000250478578224	18.289904784181896	18.326737280636824	18.25911402101764	18.17677178254823	18.16603132386195	18.16473560158198
Con_Pmod_vs_Con_Scr	O00178	GTPBP1	0.00518086	18.189692521388576	0.24677905886039153	0.8098955450842502	0.9622057408730721	-5.90303	18.11036736974196	18.167360006257756	18.153433728520685	18.147189162343768	18.153627167309047	18.145887356547455	18.26828873111076	18.30715321139263	18.2867	18.17923280367831	18.196097283855348	18.161001216102303
Con_Pmod_vs_Con_Scr	O00186	STXBP3	-0.0161192	22.600315577364476	-0.664724	0.5207333832629009	0.8662147625762049	-5.71343	22.636449024568435	22.654057314386613	22.642466924293945	22.60280005466905	22.62805651311184	22.653759142523885	22.544158074672087	22.554792119052134	22.55061399260899	22.590856625953144	22.616086715464604	22.529690427068996
Con_Pmod_vs_Con_Scr	O00192	ARVCF	0.13814100914778038	16.38427145874242	1.627182312736476	0.133664	0.6783371754506453	-4.74016	16.13108338651944	16.362956158828517	16.42768526500965	16.508526935294743	16.508844718309668	16.318776184196523	16.21354483874759	16.471777594366895	16.378055618249046	16.427255407331064	16.459324573735156	16.403426824320736
Con_Pmod_vs_Con_Scr	O00203	AP3B1	-0.0323389	23.25493608081033	-1.81146	0.0990899	0.64708	-4.49336	23.230687436152145	23.24808113200215	23.219665002507963	23.206512211380925	23.201881665772575	23.19302309622763	23.297642117591376	23.29297826909997	23.322306667256395	23.280707669442783	23.271270471641703	23.294477230648376
Con_Pmod_vs_Con_Scr	O00213	APBB1	0.057784201691362114	18.22616894832424	1.8825837868912614	0.0880871	0.6307141104399019	-4.39466	18.140423569427703	18.165434818205533	18.24354379835632	18.273313885968463	18.257516335674904	18.191924569420273	18.186159495430015	18.221024845029618	18.175594263530584	18.27156397597413	18.294414682240504	18.293113140632848
Con_Pmod_vs_Con_Scr	O00214	LGALS8	-0.0676766	21.834259704077326	-1.55251	0.15050088826155816	0.6957485796746935	-4.83601	21.99033941687935	21.994962929042835	21.90054406708862	21.825738874823276	21.922148083946873	21.93492966392944	21.749535414288953	21.60962134811017	21.628843183365166	21.79119487296256	21.815982072294656	21.84727652219599
Con_Pmod_vs_Con_Scr	O00217	NDUFS8	0.0293098	19.771509321866226	1.087008790514051	0.3016503049369367	0.7728769975140972	-5.36492	19.800878907013015	19.77788468705985	19.83180339235979	19.816119720369617	19.835071139064276	19.847305412774453	19.69509639646215	19.76460953981231	19.694665518500944	19.75004655393576	19.75324946645475	19.69138112858779
Con_Pmod_vs_Con_Scr	O00221	NFKBIE	-0.0441327	16.44604627440057	-1.6404	0.13086323678860975	0.6727084736593909	-4.72292	16.496860476601423	16.489067737097546	16.44651800610957	16.44145549404044	16.390285217072616	16.468307324068633	16.51110578035653	16.524072053436097	16.567420202847103	16.36069131399748	16.344656128917702	16.312115558261695
Con_Pmod_vs_Con_Scr	O00231	PSMD11	-0.0285145	22.41316061996882	-1.27436	0.2303480207171969	0.7387203027034835	-5.16776	22.43129210054493	22.42195619096505	22.392239164308325	22.37561739535357	22.403917582142483	22.380408964619942	22.424108794636144	22.37875593043386	22.452944011306965	22.434898760482387	22.429240440060987	22.43254810477121
Con_Pmod_vs_Con_Scr	O00232	PSMD12	-0.0293103	22.324670208704344	-0.87878	0.3994230190529252	0.8278546143007929	-5.5547	22.39284055748437	22.32949950432924	22.283309490143154	22.269910082753423	22.329338213078977	22.31847047486089	22.305657721331514	22.244392349025695	22.342616852840266	22.376089171977405	22.34054276815383	22.363375318473356
Con_Pmod_vs_Con_Scr	O00233	PSMD9	-0.0453455	20.078301361424813	-1.74037	0.1113308481129118	0.6613587501684589	-4.59018	20.133112631386453	20.08977909882674	20.08814854781189	20.094639436496244	20.0153	20.06507150290939	20.12621457063862	20.117443917224744	20.1357	20.02616628620169	19.99093072968823	20.057108695597456
Con_Pmod_vs_Con_Scr	O00244	ATOX1	-0.0424006	21.840383919088623	-1.66978	0.12482746296701729	0.6678546603679277	-4.68435	21.904291786108818	21.843265830022617	21.82494563278775	21.79681434562906	21.81411503014949	21.83437193775175	21.841051797049385	21.850293624082987	21.85104134956752	21.855919709549877	21.804140511622727	21.864355474741497
Con_Pmod_vs_Con_Scr	O00258:A0A3B3ISE9	GET1:GET1-SH3BGR	0.16249567043312751	21.6545	2.2110016170109352	0.0505499	0.5529377476554445	-3.91956	21.684833606457858	21.67887366828892	21.56628594717725	21.79996997393688	21.84664308797231	21.77086717131422	21.516139030234665	21.667375339376424	21.854815639727633	21.565805247315694	21.418232420175332	21.484196192677636
Con_Pmod_vs_Con_Scr	O00264	PGRMC1	-0.00920448	21.47329777977299	-0.337146	0.7427304332952458	0.9427645100362444	-5.87633	21.524633243028127	21.473122488208094	21.464070948736936	21.484612859131403	21.48909094358839	21.460509428198502	21.449739341880083	21.39600412611965	21.477245443802175	21.48771987366044	21.455688653409744	21.51713600751234
Con_Pmod_vs_Con_Scr	O00267	SUPT5H	-0.0142749	20.555737322215652	-0.847233	0.41598824357305386	0.8325437710232337	-5.58051	20.54282647918131	20.538855837381657	20.55584556683014	20.5356	20.52353590498863	20.535610816541173	20.585774640171955	20.580096111171564	20.55877298881015	20.565971917554705	20.57740681153354	20.5686
Con_Pmod_vs_Con_Scr	O00268	TAF4	0.027282385786827845	11.097879646347414	0.6260309263450495	0.5448256084117047	0.8791897584673674	-5.73787	10.984105524107909	11.126355944169244	11.143481565037035	11.141364558417203	11.151036251073933	11.043389381183529	11.206328696506333	11.200245791123752	11.178225432287512	10.957139209990512	11.032929620807815	11.009953781464183
Con_Pmod_vs_Con_Scr	O00273	DFFA	-0.0233637	21.37271896491019	-1.21268	0.25215115525970705	0.7439648048457665	-5.23522	21.40820688544217	21.3995	21.37484360688284	21.370319036443146	21.348799006603123	21.393302705227864	21.37018558612051	21.348501720524222	21.345650604520188	21.368447553477093	21.364394292871744	21.380515357750323
Con_Pmod_vs_Con_Scr	O00291	HIP1	0.061784701451056634	16.51428094581391	0.7921441488720006	0.44601741517669646	0.8459962000829986	-5.62362	16.346208624703145	16.452826619974687	16.49035811635524	16.542556581970207	16.424436619973616	16.50775426344241	16.43461774842149	16.651513886791957	16.646116074239345	16.620321070116095	16.66155966239234	16.393102081386388
Con_Pmod_vs_Con_Scr	O00299	CLIC1	-0.00791447	24.34953086548491	-0.279341	0.785475	0.9553462631352436	-5.89434	24.371682534809302	24.31604947624572	24.304296596422553	24.344747710517055	24.263816301254913	24.359721181650347	24.40140252638116	24.37369265466413	24.384815380434222	24.363201035570786	24.34031467766612	24.37063031020258
Con_Pmod_vs_Con_Scr	O00303	EIF3F	-0.0177365	22.942435014875564	-0.644117	0.5334850261481066	0.8747840053513282	-5.72662	22.94441941476792	22.98754435250823	22.925468015802338	22.930287071453623	22.962051840900585	22.9119	22.93760098065245	22.936647233902132	23.020166774269715	22.923174785325163	22.906144477518648	22.92383195791454
Con_Pmod_vs_Con_Scr	O00308	WWP2	0.16645724775871784	19.585612883395566	1.3036559049857293	0.2205457603496007	0.7354576507643895	-5.1349	19.559048822250947	19.464203455742748	19.172562163026896	19.301899988138867	19.6577	19.735612072884297	19.97191068356762	19.968312826504956	19.78801369109281	19.4881	19.319919131688938	19.600073177468797
Con_Pmod_vs_Con_Scr	O00329	PIK3CD	0.013019821354543382	19.845643364930567	0.2845772929319486	0.7815695688986309	0.9552746233869726	-5.89285	19.80991344792224	19.78584344404437	19.763838952407173	19.7391	19.760806463270686	19.898756683424924	19.901059720863213	19.93886262729215	19.800140306742385	19.931444224100275	19.94211797502805	19.87584437232953
Con_Pmod_vs_Con_Scr	O00330	PDHX	8.864586011867459e-4	21.281398736989065	0.047443378174581614	0.9630610736208391	0.9890780291391064	-5.93287	21.366835591436207	21.348369738687385	21.37029781014328	21.362888670213696	21.34923343121704	21.376	21.203907863499328	21.181009631617933	21.166764004939388	21.214111127950883	21.232684446741494	21.20464211278244
Con_Pmod_vs_Con_Scr	O00391	QSOX1	-0.0163045	20.61347387493297	-0.363174	0.7237680843834184	0.9368270671702358	-5.86714	20.70583449523011	20.679923574354433	20.594702071844825	20.658307644233354	20.65530775638747	20.617931157395734	20.577711269904057	20.524146760379892	20.681440955739028	20.562380303099133	20.49269291131396	20.61130759931366
Con_Pmod_vs_Con_Scr	O00399	DCTN6	-0.0329384	20.971223216100917	-0.921832	0.3775618734970405	0.822423	-5.51819	21.043530631778513	21.00942447207623	20.934056813508025	20.960156793571304	20.963778599483145	20.964261202642724	20.942	20.933201379304517	21.01100900504006	20.97723958704563	20.903157727991747	21.012833172998587
Con_Pmod_vs_Con_Scr	O00401	WASL	-0.0827174	19.84060468553323	-2.43821	0.0341538	0.5307865960767675	-3.57743	19.88889226965695	19.82438615558505	19.87245684105652	19.7713	19.742892470524232	19.82334635908099	19.924017651310475	19.8858	19.797278264849567	19.841615994188224	19.86079338087231	19.854426863256354
Con_Pmod_vs_Con_Scr	O00409	FOXN3	-0.0797976	6.923120110757483	-0.933237	0.371915	0.8190003062213781	-5.50827	7.0232833118737465	6.956639762019384	6.7906220066510565	6.754261430931041	6.954605619756485	6.8222851944006235	6.959577481163472	6.920069846039318	6.981486806289501	6.968015447931138	6.802081458753185	7.144512963280848
Con_Pmod_vs_Con_Scr	O00410	IPO5	-0.120465	21.807412855013244	-2.08179	0.063021	0.5814188760191608	-4.1098	21.864153245026166	21.88289641008125	21.697083317545268	21.68442486576594	21.70176614967325	21.696545663445093	21.859152730149063	21.791337102952745	21.937851892467073	21.85522504047167	21.76827829915376	21.95023954342765
Con_Pmod_vs_Con_Scr	O00411	POLRMT	-0.140589	22.156773408997147	-1.98428	0.0743109	0.6052120935758522	-4.25067	22.42042657391158	22.4831	22.292947675313368	22.144589189229674	22.348361721097113	22.28178380112473	22.11071627976107	21.918927209729944	22.14645240846319	21.911	21.956696025751512	21.866251358298403
Con_Pmod_vs_Con_Scr	O00418	EEF2K	-0.0290089	13.263213323236826	-0.834208	0.42296231708098797	0.8348664894343217	-5.59093	13.322999811103063	13.440167718516197	13.359646167598823	13.38179894577425	13.281936350862434	13.372051578431645	13.172314010327227	13.14630422839271	13.151747721163147	13.1547	13.207299450422065	13.167599238876154
Con_Pmod_vs_Con_Scr	O00422	SAP18	-0.00727005	15.730951653710441	-0.281929	0.783544	0.9552746233869726	-5.89361	15.73730915006423	15.686129460054923	15.725513848906836	15.68932868024828	15.69376848586256	15.74404514112733	15.782528776923924	15.777234227334134	15.741488810035024	15.742651446128978	15.758789915899229	15.692631901939858
Con_Pmod_vs_Con_Scr	O00425	IGF2BP3	0.00938557	18.620520524738822	0.2970631364099151	0.7722831621660713	0.9536181457104492	-5.88917	18.905092966595543	18.952830032184465	18.978074780672564	18.96385909551126	18.936927717916063	18.96336768909915	18.231363853320573	18.303017901290616	18.265677016650383	18.32903395325212	18.36222378969245	18.254777500680657
Con_Pmod_vs_Con_Scr	O00429	DNM1L	-0.0368162	23.289357616071165	-1.65026	0.12880942664993317	0.6687490965699084	-4.71002	23.33165547665083	23.36322692623791	23.318192847275036	23.309077989812653	23.310332721000066	23.28321589469163	23.25765048278863	23.266273109331607	23.310294577306337	23.24099526778271	23.21916667961387	23.262209420362716
Con_Pmod_vs_Con_Scr	O00442	RTCA	-0.0735505	23.81869688655284	-2.55757	0.027756038002230858	0.5084436347853483	-3.39491	23.93989581549564	23.936223671644708	23.84967113549865	23.797178936761732	23.83806030508238	23.86989977717747	23.765750299723575	23.763667602141133	23.79614568630499	23.771489223587476	23.736243205775537	23.76013697944079
Con_Pmod_vs_Con_Scr	O00443	PIK3C2A	0.00291036	22.538708992404718	0.051753785942611014	0.9597081811868637	0.9884815766476981	-5.93265	22.627433500956137	22.60107085400864	22.53509621870524	22.474695739389833	22.698344756149655	22.599291160810225	22.464542418544504	22.4652	22.57858513040589	22.520006109586763	22.49478798471937	22.405431919333957
Con_Pmod_vs_Con_Scr	O00459	PIK3R2	0.00889117	20.86424880606476	0.44237887381916086	0.6672983789906348	0.9238497099653658	-5.8351	20.86864349738306	20.93057770250068	20.887921259765612	20.89100943332526	20.914413601165027	20.908392949557104	20.82279992984802	20.835925616123863	20.8166	20.82443355285812	20.83867334052672	20.831546471293876
Con_Pmod_vs_Con_Scr	O00461	GOLIM4	-0.0304568	22.433976941310995	-0.967884	0.35513122356875404	0.8054573795537711	-5.47752	22.52984662395986	22.50320631840954	22.44737814055098	22.453832395758663	22.482477636784346	22.45275071286257	22.39353885299758	22.389894182399996	22.445817636958065	22.377189195696268	22.31314274229151	22.41864885706256
Con_Pmod_vs_Con_Scr	O00462	MANBA	0.0696945	20.662121143774698	2.324969355901402	0.0415481	0.5358613997467039	-3.74897	20.557331246599965	20.627461656512605	20.661259774902582	20.712644728219715	20.674241719504145	20.66824974119298	20.70779297135695	20.710495909682983	20.67807924416236	20.63051255422632	20.69287649123495	20.624507687700792
Con_Pmod_vs_Con_Scr	O00468	AGRN	1.7224019168793347e-4	18.202028965252154	0.00290477	0.9977374462269772	0.999619	-5.93402	18.090564000284218	18.18035048067836	18.22419379791276	18.114365267817796	18.165604479355835	18.215655252276775	18.223782814076788	18.309877124114504	18.12022324475319	18.258877580793076	18.35677297099899	18.164080569963577
Con_Pmod_vs_Con_Scr	O00471	EXOC5	-0.00603641	22.909507033424354	-0.35473	0.7298997005915994	0.9374799460079529	-5.87019	22.91277318627018	22.922809863552526	22.906293768993933	22.91193457829971	22.909830434011603	22.902002569484576	22.883910297731187	22.89977620912251	22.904543395397138	22.921223295826895	22.905498057906374	22.93348874449563
Con_Pmod_vs_Con_Scr	O00472	ELL2	-0.0384637	18.83968510635543	-0.326365	0.7506389231014987	0.9446365168739791	-5.87994	18.980648606434865	18.75999271453338	18.74819264817563	18.864521558540837	18.854499740890304	18.654421704596704	18.884515018850323	18.65852156288655	18.973976800316866	18.871174091864656	18.693798578935205	19.131958250239823
Con_Pmod_vs_Con_Scr	O00479	HMGN4	0.13273579653150236	13.67065723547006	1.3630579881332154	0.2017235106437466	0.721058	-5.06666	13.77804140634262	13.332724795988325	13.541001922399069	13.645619476733469	13.64292251355629	13.76143352403476	13.75905034953465	13.53774056499089	13.678548632416897	13.845481450900284	13.81616682295469	13.709155365788778
Con_Pmod_vs_Con_Scr	O00481:P78410:O00478	BTN3A1:BTN3A2:BTN3A3	0.2849570224553073	13.572565539528036	1.6655194377751996	0.12568681230387554	0.6678546603679277	-4.68996	13.455786366008386	13.401441382426787	13.861690510303015	13.650949485212251	14.103468193520143	13.819371647371709	13.543362931077036	13.706677018963626	13.285863573900148	13.363599727550866	13.594388559484509	13.084187078517951
Con_Pmod_vs_Con_Scr	O00483	NDUFA4	-0.0443464	20.23841425474915	-1.06027	0.31308930459139517	0.7770016169248082	-5.3911	20.327346240856254	20.327303371451652	20.26233577590024	20.2055	20.258610199257053	20.319822558421546	20.178325321807137	20.179420674047428	20.24249381790371	20.2244	20.23601719656715	20.099409461950103
Con_Pmod_vs_Con_Scr	O00487	PSMD14	-0.0042562	21.862942938286185	-0.107956	0.9160905594238402	0.9819695277406157	-5.92808	21.94217674183719	21.852248467340782	21.799233985249508	21.80274948938747	21.892301878366172	21.885839233918873	21.864419498073673	21.81310439664822	21.894668752628927	21.89294266946624	21.837305916526056	21.878324229991115
Con_Pmod_vs_Con_Scr	O00488	ZNF593	-0.00245726	17.69266714083343	-0.102548	0.9202773877131822	0.9825557355102871	-5.92866	17.7185	17.721912132478302	17.69413119918056	17.704430460440957	17.7382	17.68455431438022	17.703580698123545	17.686434738516823	17.718501851819468	17.63979874228817	17.614097623984033	17.687839272638243
Con_Pmod_vs_Con_Scr	O00499	BIN1	0.016239513622597457	17.447344390545517	0.32603	0.7508849665076944	0.9446365168739791	-5.88005	17.401733447488468	17.35573390900407	17.490734894445193	17.449205592752037	17.37438772861593	17.473327470437553	17.451641883790103	17.504329150230085	17.36900849432526	17.50902897678571	17.567720208389744	17.42128093028204
Con_Pmod_vs_Con_Scr	O00505	KPNA3	-0.013805	22.311870416762464	-0.518371	0.6150779663046669	0.9071471488695353	-5.7987	22.30831273007696	22.352772099612853	22.31099395616989	22.334260916083565	22.321144043849905	22.27525896011618	22.26692538164494	22.269195830881348	22.325761104252734	22.31889071859068	22.29872775083286	22.36020150903764
Con_Pmod_vs_Con_Scr	O00506	STK25	-0.0640467	17.017861585520304	-1.23594	0.24374375241333285	0.7432859755095039	-5.21008	17.115189351934678	17.18512138618038	17.05731595447265	17.045741276689792	17.09404166331879	17.02570364051293	16.808954771752862	16.9383	16.998771724977782	17.011529035698803	16.90644386166542	17.027214405667145
Con_Pmod_vs_Con_Scr	O00541	PES1	-0.00448018	17.99193992374139	-0.146823	0.8860866977474215	0.9760192068290906	-5.92303	18.025122914486712	18.032850567401283	17.986831336296724	18.02604624518893	18.02939392879606	17.975924093067114	17.98471121002667	17.96649051132985	18.051794261658827	17.93920888465497	17.899159502826016	17.985745629163535
Con_Pmod_vs_Con_Scr	O00559	EBAG9	0.00184942	19.8849	0.0572817	0.9554094723928153	0.9879240501642578	-5.93235	19.874214968771813	19.85742807071697	19.908699309963097	19.871294957772335	19.864319601255712	19.910276035735077	19.88990624052175	19.895530460287898	19.773470263278288	19.911206407490663	19.940650209810904	19.922192841661857
Con_Pmod_vs_Con_Scr	O00560	SDCBP	0.035875	21.08071282445842	1.4104556543199298	0.18768685053867448	0.7178520113664869	-5.01076	21.001106414604955	21.060143539346548	21.08394329750258	21.0939	21.088205944514907	21.07074398755283	21.09860175875873	21.107206049779812	21.06802155173493	21.08368169168566	21.131570890628407	21.0815
Con_Pmod_vs_Con_Scr	O00562	PITPNM1	-0.0358243	21.393132918179624	-0.855997	0.41134002489026833	0.8314029751114795	-5.57342	21.42323234224707	21.48756274608639	21.524116323979054	21.454400102733036	21.397818800151537	21.475219582325497	21.33522145415654	21.39511967447641	21.23989024453046	21.31350444332986	21.3715	21.300049139973723
Con_Pmod_vs_Con_Scr	O00566	MPHOSPH10	0.00673475	16.620096694970666	0.28241565954362147	0.7831809862197741	0.9552746233869726	-5.89347	16.645982310151155	16.60267338225114	16.61379378877222	16.648720554183214	16.61246205537983	16.621471120372057	16.62774180101353	16.588301844360682	16.601094197186693	16.616205745673142	16.59617939456928	16.666534145735046
Con_Pmod_vs_Con_Scr	O00567	NOP56	0.010235077048992736	20.80814929684697	0.543145	0.5985088484520145	0.8996612922819921	-5.78566	20.815119306424613	20.833405851524425	20.85017092231634	20.861583604797964	20.831280074936327	20.836537631678077	20.751934837734854	20.774709841466528	20.74033429782183	20.794398969610533	20.800588670228137	20.8077
Con_Pmod_vs_Con_Scr	O00592	PODXL	-0.0110273	10.454075565082276	-0.101204	0.9213180743599858	0.9825557355102871	-5.9288	10.344913277831145	10.691038275030248	10.34969500376494	10.338508458652289	10.660471569703564	10.353584725572206	10.380063139788405	10.359085732993304	10.596633633042412	10.438119601603788	10.445976642877412	10.490816720127606
Con_Pmod_vs_Con_Scr	O00622	CCN1	0.020135790398452258	20.681114152375066	0.6022021889173538	0.5599746596610722	0.8858892756510479	-5.75226	20.67035591941555	20.72852552343028	20.709262921449103	20.78296319093692	20.71365197383343	20.67193657071994	20.58948488344012	20.60992730413042	20.65128220593617	20.667372935145103	20.64832243552885	20.730283964534927
Con_Pmod_vs_Con_Scr	O00623	PEX12	-0.0315055	15.3515	-0.354553	0.7300281513062523	0.9374799460079529	-5.87026	15.58108917410594	15.33110557385749	15.330756500300817	15.207560199483131	15.463264511180146	15.47760995492445	15.287760684398013	15.0671	15.173287957191995	15.467698524736786	15.46600043732225	15.365150689414993
Con_Pmod_vs_Con_Scr	O00625	PIR	0.0310933	17.912286012516667	0.9420837487101793	0.3675766183989968	0.8138334561499276	-5.50051	17.879333172998546	17.82520634276387	17.88797797625665	17.955973102873614	17.82194257265374	17.907881771333805	17.962425368350683	17.91276451869233	17.918617851308507	17.949805005177787	17.97115043393913	17.954354033851356
Con_Pmod_vs_Con_Scr	O00629	KPNA4	-0.0457522	20.69781489077343	-1.06905	0.30929648886995625	0.7736762999204284	-5.38255	20.797942938079785	20.73414206014405	20.72263852308934	20.74548440958024	20.684155445878726	20.687827041676925	20.66177884324816	20.632676071607428	20.64491529483005	20.672397855458176	20.599029045968237	20.79079115972003
Con_Pmod_vs_Con_Scr	O00635	TRIM38	-0.00551759	24.527921267150543	-0.0740016	0.9424170001841619	0.9873416866963577	-5.93123	24.36866616373156	24.338654194940325	24.493808018897703	24.349719876193056	24.36539060361073	24.46946512607407	24.737542174727093	24.748441912346895	24.54279813976046	24.639304657887777	24.771022627039436	24.51024171059739
Con_Pmod_vs_Con_Scr	O00716	E2F3	-0.118349	11.469852245595405	-1.27927	0.22868039707729726	0.7387203027034835	-5.16229	11.620173559083613	11.57924108766978	11.608561259472973	11.423745406581627	11.714146956354895	11.315036531185488	11.327315759057246	11.324085463802206	11.569940210849772	11.41287377094996	11.336128034568956	11.40697890756834
Con_Pmod_vs_Con_Scr	O00743	PPP6C	-0.0385452	22.397423693268934	-1.42867	0.18251771398122912	0.7137532972740651	-4.98895	22.416880617921255	22.43418159511616	22.352567531668004	22.34365120908571	22.372690852093985	22.371652229521345	22.412515234666497	22.37418532660258	22.40895834091694	22.419543428463346	22.39640634447966	22.465851608691743
Con_Pmod_vs_Con_Scr	O00746	NME4	0.0425924	15.423913425809022	0.8870830265324011	0.39513984549415504	0.827785	-5.54777	15.498169950196544	15.41250305200715	15.42713795970556	15.54056968062647	15.4841	15.440908889713556	15.338205238112614	15.268183132582347	15.339305852788296	15.427056087981033	15.357611844478871	15.553199866211031
Con_Pmod_vs_Con_Scr	O00754:M0R2P5	MAN2B1:NA	0.00548478	22.195494959757635	0.20198121414189446	0.8438384949595491	0.9689646436341244	-5.91324	22.21504483320932	22.255857578864536	22.290378966836915	22.2977	22.223725092946953	22.25630805615908	22.129951101679048	22.14084866096207	22.113448687653516	22.131006066852944	22.174697541439915	22.11697034967381
Con_Pmod_vs_Con_Scr	O00762	UBE2C	-0.370156	-7.11177	-1.19082	0.2602676876855711	0.7453392371742814	-5.25855	-6.98965	-6.81497	-7.56401	-7.39944	-7.29548	-7.78418	-6.646	-7.10955	-6.20367	-7.28904	-7.68429	-6.56099
Con_Pmod_vs_Con_Scr	O00764	PDXK	-0.0480456	24.349550422796664	-1.56388	0.1478212681610222	0.694261	-4.82158	24.32995980023037	24.323964757096693	24.309060396646295	24.2213	24.282105692467297	24.315440282867105	24.45753173029604	24.40379735582964	24.390895176374944	24.38678367071493	24.42996411003263	24.34380001410841
Con_Pmod_vs_Con_Scr	O00767	SCD	0.19294306385357984	9.00507	2.0594554099506217	0.0654539	0.5896186228825004	-4.14229	8.995046000787495	8.905484466259832	9.190465504526172	9.337153415147409	9.078948942383525	9.25372	8.808732773017542	9.015319200845882	8.703106247474512	8.936769257881235	8.96799	8.868114714400493
Con_Pmod_vs_Con_Scr	O14497	ARID1A	-0.0294133	19.042280688685647	-1.15645	0.27344128827016745	0.7529696202946904	-5.29458	19.051024267344346	19.049338164181563	19.010645631071384	18.966109261562615	19.032637285616087	19.024021502655987	19.0568	18.98937840557638	19.02893939426678	19.096248374834698	19.11544194974708	19.08683363942803
Con_Pmod_vs_Con_Scr	O14519	CDK2AP1	0.026506408205213106	11.088577443517071	0.6017332641812545	0.560275	0.8858892756510479	-5.75253	11.036064501520414	11.054107654439626	11.082138237875157	11.083410849642654	11.104029075430905	11.064389693377274	11.123286906709392	11.047848409210886	10.948423436661727	11.117508894416169	11.15279002222047	11.248931640700173
Con_Pmod_vs_Con_Scr	O14523	C2CD2L	-0.0694623	23.43783553106365	-1.1969	0.25798905473123557	0.7439648048457665	-5.2521	23.399298478649843	23.492484223308875	23.389467021932223	23.230834319795623	23.474433973957773	23.36759447506113	23.48354544586949	23.368393239469395	23.354376454318356	23.528512484452634	23.597286463398977	23.567799792549497
Con_Pmod_vs_Con_Scr	O14530	TXNDC9	-0.0406485	21.905981663683022	-0.810517	0.4358473061760624	0.8388709933359708	-5.60952	21.957163943831855	21.95801195675346	21.863004376708076	21.9121	21.90252026309205	21.841652123552127	21.870338838091484	21.817106183224507	21.941266306029917	21.923389620076534	21.846315071597058	22.038948980831417
Con_Pmod_vs_Con_Scr	O14545	TRAFD1	-0.0618352	18.970764983048156	-1.48332	0.16772936818770157	0.7027381634009853	-4.92243	19.145376875554717	18.998435534759132	19.012422904368016	18.98767811001886	18.98696881359808	18.99608275282245	18.973084849898186	18.89564818956782	18.959445584339157	18.905018070169035	18.83683413203284	18.952183979449597
Con_Pmod_vs_Con_Scr	O14548	COX7A2L	-0.0361471	20.47076558785435	-1.26404	0.2338873250360903	0.7387203027034835	-5.17922	20.54514007107333	20.543215155476616	20.53286843995668	20.482637278837704	20.486735542395927	20.543409413311835	20.446596436382865	20.43680711129232	20.4543	20.409192591707935	20.439236566000886	20.32904823176127
Con_Pmod_vs_Con_Scr	O14558	HSPB6	0.0769106	18.218540437136834	0.7719896141812265	0.4573510897863793	0.8479055457704144	-5.63875	18.06379283970007	18.081467475298695	17.938	18.215406571108176	18.119780366231456	17.97876146181896	18.311188393296504	18.22947666781511	18.52441742417618	18.364578187391167	18.220324936632668	18.575334752286217
Con_Pmod_vs_Con_Scr	O14561	NDUFAB1	-0.465889	18.58544968072117	-2.70883	0.021325487231550252	0.4900442998239445	-3.16192	18.57975498271337	19.06591137760518	19.146327661343253	18.695385175182377	18.31479739702036	18.38414470104537	18.536916216800165	18.47144598622927	18.087642041542892	18.36725932690943	18.69062725942687	18.685184042835484
Con_Pmod_vs_Con_Scr	O14562	UBFD1	-0.0505149	21.647998786637988	-1.95597	0.0779292	0.6102167381139981	-4.29107	21.65816371028002	21.64956658374759	21.583097093806213	21.554593826777907	21.561232090460265	21.6235	21.768991611683184	21.77610137238086	21.77528599843717	21.62142373316902	21.59340282604093	21.61066994598348
Con_Pmod_vs_Con_Scr	O14569:U3KQU4	CYB561D2:NA	0.20340830001607912	17.921322886494725	5.181635156772279	3.6641747132604515e-4	0.15869669973838887	0.4003075643920724	17.86494208493237	17.78820235148433	17.795979391829825	18.07095214264616	17.9691	18.0193	17.953584345707842	18.02576497333867	18.06470461338219	17.866202384698724	17.775760412968793	17.86138535129919
Con_Pmod_vs_Con_Scr	O14576	DYNC1I1	0.0899099	18.029125766137252	0.8829965713137589	0.39724386610899287	0.827785	-5.55119	17.933000941622666	18.01005914484924	17.87464382020768	18.081536360191727	18.14417823424423	17.86171908220283	17.83377172542652	17.87937485412355	18.09029276415744	18.201872920110784	18.036899113687465	18.40216023282291
Con_Pmod_vs_Con_Scr	O14579	COPE	-0.0541143	25.207	-1.50008	0.1634059726916187	0.701815	-4.90171	25.232389127956264	25.174478029237548	25.164443302083416	25.11405154576877	25.10711134133485	25.18780468550946	25.379881350412138	25.27345534435661	25.25176616536176	25.182798248800253	25.203718316737092	25.212542379709056
Con_Pmod_vs_Con_Scr	O14613	CDC42EP2	-0.0443466	16.931731359335387	-0.907358	0.3848156343574447	0.8232706972852815	-5.53063	16.989330326746213	17.005960573373326	16.99295093699221	16.841794733358824	17.014004667007963	16.999402652657697	16.883329756203413	16.86034568067217	16.811320400805833	16.93695746463611	17.00093586696326	16.844443252607643
Con_Pmod_vs_Con_Scr	O14617	AP3D1	-0.0279085	22.895124370517365	-0.760248	0.46403901354974686	0.8479055457704144	-5.64741	22.997768813356185	22.90188398803364	22.8678	22.874825153822425	22.90430002904247	22.90460161593727	22.860815888956417	22.796556010971997	22.88981231407297	22.928456918936288	22.870194639941907	22.944477720297236
Con_Pmod_vs_Con_Scr	O14618	CCS	0.051210189771467185	19.618069878471655	1.7799750968595378	0.10435099728665408	0.6575571483591474	-4.53647	19.559291092752904	19.62031254250398	19.62823305494065	19.649170213324172	19.696864923261096	19.61543212292667	19.5215	19.593513668874724	19.577610093134247	19.65530037913197	19.657341896612568	19.642290552241064
Con_Pmod_vs_Con_Scr	O14639	ABLIM1	0.10705490884652491	19.955099097284073	1.580054731832155	0.14408401205069027	0.694261	-4.80095	19.738196615390315	19.781169866176125	19.894011669667183	19.850390353607867	19.932978262803235	19.9512	20.04325748948943	20.164100557140305	19.947761916005668	20.06515546162015	20.158895199041577	19.93409751510493
Con_Pmod_vs_Con_Scr	O14640	DVL1	3.2740033210743036e-4	18.9609	0.00598235	0.9953403209635545	0.9988827629439886	-5.934	18.743809975561515	18.869992259329507	18.794134788257193	18.896337461450297	18.672297953885305	18.840283808808937	19.071151483145464	19.182093908785465	19.16092180920375	19.108986260334778	19.11282745158268	19.078287632024704
Con_Pmod_vs_Con_Scr	O14641	DVL2	0.012806109421113376	18.28539141923785	0.2862528746217295	0.7803212263751791	0.9552746233869726	-5.89236	18.16842240617632	18.18827507853648	18.29835441334324	18.285880665840978	18.17646658152611	18.23112297895228	18.36708337962313	18.445590125808742	18.305268703293937	18.309041550211255	18.353005708856095	18.296185438685622
Con_Pmod_vs_Con_Scr	O14646	CHD1	0.053001269643791815	12.954364425200644	1.5548851090330444	0.14993726892225256	0.6943749929339221	-4.833	12.928214593415872	12.8994	12.959061401873464	12.98163044505156	12.93966854546757	13.02441476922978	12.979429712166937	13.016939210639164	12.895421580146404	12.944373802614116	12.96713072715516	12.916654359119503
Con_Pmod_vs_Con_Scr	O14647	CHD2	0.058255	18.333328047650227	2.3518190700773087	0.0396652	0.5358613997467039	-3.70847	18.312290031452832	18.30931718130619	18.370539144623255	18.39368869985261	18.389142469317672	18.384080304861147	18.25819200842066	18.313561197919505	18.240309425451752	18.34575282843472	18.35737545968269	18.325687820479704
Con_Pmod_vs_Con_Scr	O14653:E7EQ34	GOSR2:NA	-0.0209093	23.754453969331372	-0.355046	0.72967	0.9374799460079529	-5.87008	23.882976866720533	23.84213802190635	23.743931665320268	23.771744614955143	23.859422804072768	23.77515122656201	23.64807491034593	23.68536141489541	23.87162688219377	23.707948691788324	23.596185008858757	23.668885524357194
Con_Pmod_vs_Con_Scr	O14656	TOR1A	-0.0236074	21.84749790852285	-0.814971	0.433405	0.8383377081920187	-5.60606	21.861579746154824	21.92392577071876	21.90695691826863	21.919673649780407	21.865014998877975	21.836951628339627	21.810557232853235	21.81325482131627	21.813538500064208	21.78142063586382	21.780952512307973	21.85614848772846
Con_Pmod_vs_Con_Scr	O14657	TOR1B	-0.0663844	21.688481571335043	-2.17736	0.0535479	0.563203	-3.96944	21.726739719450094	21.804947483569773	21.732330715515232	21.710485356970544	21.69735724614034	21.65702220519601	21.636478769751452	21.64909821756292	21.725922859485287	21.63772328126635	21.62288592517882	21.660787075933683
Con_Pmod_vs_Con_Scr	O14662:H3BU86	STX16:STX16-NPEPL1	-0.00128	20.912673074512252	-0.0613676	0.952233	0.9877182362068813	-5.9321	20.896038603201827	20.93917356099046	20.952005706152136	20.95085658919704	20.922627647070293	20.90989363346518	20.884492081655583	20.896494706212614	20.89473419516769	20.894283052376444	20.918265305529413	20.893211813128342
Con_Pmod_vs_Con_Scr	O14668	PRRG1	0.058926490496105544	19.24236375419423	1.6437983597652936	0.1301527002092204	0.6713587609041372	-4.71848	19.30875982862287	19.39843929579729	19.366920042440174	19.449396252627896	19.397141385206112	19.404361000514612	19.09768298102635	19.13635647698303	19.041999545360103	19.069631011658444	19.071670637877105	19.16600659221679
Con_Pmod_vs_Con_Scr	O14672	ADAM10	0.00877384	21.477246017599718	0.2918652981178711	0.7761446193096784	0.9541895079314293	-5.89072	21.57805467955412	21.612347549747067	21.584140695005793	21.630171375139717	21.605665514925946	21.56502755635791	21.328097639204124	21.32057222208722	21.32662212202185	21.369361370113033	21.345425376415953	21.46146611062389
Con_Pmod_vs_Con_Scr	O14681	EI24	0.10482167148891008	21.987947851788643	1.4453495102959004	0.17788996817777267	0.7117868613415159	-4.96881	22.161095802214227	22.196947712005397	22.01442498621572	22.220550191737427	22.255319157196332	22.211064165968295	21.789623117442986	21.935345168984917	22.0758	21.7215	21.55740956290534	21.716324922856884
Con_Pmod_vs_Con_Scr	O14682	ENC1	0.077254	12.546364709853826	2.1243429788385586	0.0586211	0.5693936031158129	-4.04757	12.474529861870096	12.48460993355291	12.550647511620683	12.579034806027774	12.615752021161976	12.546762347652669	12.53684599245493	12.66705392797328	12.549540310687778	12.523141626568858	12.49517649129306	12.533281687381896
Con_Pmod_vs_Con_Scr	O14727	APAF1	0.011654757702643792	17.825077847825643	0.27648208567339627	0.7876097261949253	0.9559414737531442	-5.89515	17.829127366146285	17.85543336140443	17.871971269557186	17.827074231192576	17.855732409314527	17.90868962970871	17.89356411221837	17.85614761648942	17.840394704855704	17.725161972194112	17.813891441853322	17.623746058973083
Con_Pmod_vs_Con_Scr	O14730	RIOK3	0.0020305	21.16936211662217	0.053402371456642145	0.9584260259987567	0.9881015666745631	-5.93257	21.13984033140732	21.133407753541725	21.093287128289344	21.15075004396561	21.142525983551312	21.07935069280505	21.238758667449417	21.266118137960778	21.36268109816651	21.153991150195782	21.082037463816892	21.1896
Con_Pmod_vs_Con_Scr	O14734	ACOT8	0.0264867	21.9261	0.9854038622615384	0.3468564016913309	0.7978482743530775	-5.46163	21.85775115137609	21.900456125981982	21.95072263134269	21.950725194889728	21.935727332091354	21.901937380472592	21.934012439309875	21.971324898620345	21.934593419994183	21.91789408766536	21.951188262214817	21.906979641670183
Con_Pmod_vs_Con_Scr	O14735	CDIPT	0.21915049648431761	21.180672293789314	2.3414163525594387	0.0403846	0.5358613997467039	-3.72417	21.09879529471571	21.260515222503223	21.10425248554821	21.40144982405207	21.355826145763402	21.363738522404603	20.98967174951111	21.27580608860556	21.4205	21.05942246651909	20.97043279801406	20.86768429472193
Con_Pmod_vs_Con_Scr	O14737	PDCD5	-0.0616469	16.944503578910215	-1.5584	0.14910738497838186	0.694261	-4.82854	17.067728180256008	16.964111916950547	16.95138805701759	16.926802935573747	16.91460295002138	16.956881477330356	16.922278236845628	16.77716990370018	16.881677313063832	16.987195840959934	16.97901492764617	17.00519120755721
Con_Pmod_vs_Con_Scr	O14744	PRMT5	-0.0296488	21.60810383459432	-1.45148	0.17621359599252012	0.7112498416474639	-4.96137	21.58817194349026	21.614754968839232	21.584815102720484	21.57938351324364	21.566152607920735	21.55325935087614	21.67057168497634	21.6585	21.669089469792997	21.591460136340196	21.582245204797385	21.63879552791722
Con_Pmod_vs_Con_Scr	O14745	NHERF1	-0.013392	19.080456986063275	-0.374533	0.7155523977001188	0.9345001222922931	-5.86292	19.203384091846942	19.258654998063708	19.281443432463128	19.26000040230846	19.21746999065593	19.225836002260756	18.92316127920792	19.01705563301547	18.878637832766163	18.884029974431435	18.87960759779785	18.936202597941534
Con_Pmod_vs_Con_Scr	O14763	TNFRSF10B	0.021115105916582166	18.163371582422645	0.26169924523011656	0.7986775302701902	0.9582513061459758	-5.89918	18.209133349905937	18.493094771929997	18.23064122329281	18.30655391128093	18.419579961799062	18.270080789798502	17.845343704778916	17.972228475732674	18.10389499111588	18.046087176196707	18.001227668332103	18.062592964908237
Con_Pmod_vs_Con_Scr	O14772:V9GXZ4	FPGT:FPGT-TNNI3K	0.0989565	18.023873422611445	2.3440130061261577	0.0402039	0.5358613997467039	-3.72025	17.90705934695851	17.901589474312317	17.951710593733974	18.05986055404069	18.00307210453813	17.994296276082032	18.02258543273904	18.17096874167004	18.043731905207547	18.081647820253224	18.01547451104783	18.134484310754008
Con_Pmod_vs_Con_Scr	O14773	TPP1	0.0761091	21.074127968064523	1.6346080415586295	0.1320844634370368	0.6756262841995192	-4.73048	20.995509919465757	21.065353696736477	21.10528315960564	21.121742885232276	21.121970539430365	21.15076050385662	21.004151736517706	21.106025472404557	21.03838602372563	21.081829875899864	21.142072171100324	20.95644963279907
Con_Pmod_vs_Con_Scr	O14776	TCERG1	0.00192168	17.26926795035376	0.0718638	0.9440773646102274	0.9875493851650333	-5.93139	17.25179483028294	17.24082055334198	17.25656011324724	17.220305880796175	17.251945622434143	17.2827	17.2684	17.269190108508766	17.249552889835368	17.325878956364704	17.356408135428932	17.25763080090468
Con_Pmod_vs_Con_Scr	O14777	NDC80	0.0381247	19.717019602794615	0.9051694203738627	0.38592076476319936	0.8232706972852815	-5.5325	19.686582855099047	19.717226333369904	19.68354200278166	19.788192218099777	19.729006504529277	19.684526539876845	19.647328330592263	19.74	19.803981086162032	19.724298345521447	19.649767385090076	19.74977816311833
Con_Pmod_vs_Con_Scr	O14782	KIF3C	-0.012737	17.32101215129907	-0.424259	0.6800429468233267	0.9256352937315804	-5.84297	17.319089778556474	17.283306828366424	17.378859596595078	17.365191417491566	17.311501863565468	17.266352018166273	17.28304660222721	17.30105638798897	17.322002253459544	17.34229895798403	17.342395845440112	17.337044265747664
Con_Pmod_vs_Con_Scr	O14786	NRP1	0.0455355	15.510085765789311	1.9719408796389624	0.0758679	0.6080238507934884	-4.26831	15.3467	15.426224965010675	15.39766442080453	15.448068758975412	15.420284030960715	15.438874915879705	15.60398031689582	15.620370993809448	15.5929	15.596411014742204	15.62818117183664	15.601366596828278
Con_Pmod_vs_Con_Scr	O14787	TNPO2	-0.0371879	21.183962912662878	-2.25232	0.0470878	0.5427318495898779	-3.85799	21.16154838116681	21.181380120223288	21.163546295062744	21.123571060619625	21.13436420075566	21.13697598320319	21.16500253043681	21.1845	21.16866298059073	21.26407983663842	21.26179486210266	21.262161751845177
Con_Pmod_vs_Con_Scr	O14802	POLR3A	-0.0469691	18.74143330459701	-2.22833	0.0490693	0.5511575243171402	-3.89378	18.76515012982373	18.807456179086554	18.745954864908654	18.708122603524306	18.718038079723787	18.75149316213052	18.79208759101707	18.78121379085082	18.773874409117237	18.679947078260927	18.689548391677885	18.68431337504261
Con_Pmod_vs_Con_Scr	O14817	TSPAN4	-0.0588304	18.907382402071445	-0.885085	0.396167	0.827785	-5.54945	18.94431877775807	19.002596525244872	18.86481756731393	18.947229861740944	18.857036892575955	18.831	18.912732938402524	18.917870882012313	18.986654022425355	18.848402436453235	18.740353996119502	19.03560011494863
Con_Pmod_vs_Con_Scr	O14818:Q8TAA3	PSMA7:PSMA8	-0.0500659	23.010508898123927	-1.56652	0.1472069032125855	0.694261	-4.81823	23.0643	23.050751186233992	22.972224762246377	22.95113287621924	22.992971218976898	22.993007335510057	23.039701823798787	22.96225573870834	23.06745935350845	23.0154	23.000847390848868	23.016038374497825
Con_Pmod_vs_Con_Scr	O14828	SCAMP3	-0.0139632	23.985407142468944	-0.390113	0.7043454661078459	0.931702	-5.85693	24.058186621465335	23.996442896745055	23.922734067115492	23.95432397670685	23.969895159283336	24.01125495567653	24.073044510029632	24.04749828191089	24.12255967127412	23.912087420158898	23.84972096924284	23.907137180018356
Con_Pmod_vs_Con_Scr	O14867	BACH1	-0.0132998	18.826073473846524	-0.358504	0.7271565417103651	0.9372527604391676	-5.86884	18.807713243570426	18.82749439624589	18.89398763031121	18.813244383272295	18.844787807569528	18.831263556504904	18.80544573578783	18.848641958746548	18.695335931134792	18.829799617065223	18.865564227800498	18.84960319814916
Con_Pmod_vs_Con_Scr	O14874	BCKDK	0.0514731	20.094829626749185	1.4323845795971546	0.18147788345554086	0.7137532972740651	-4.98448	20.085368993125975	20.09145149981325	20.140522410790123	20.15772003999541	20.130425606042287	20.18361666331324	20.072284903289148	20.14188132971033	20.09973528551732	20.036257386887755	20.0693	19.929365283267487
Con_Pmod_vs_Con_Scr	O14879	IFIT3	0.00187558	22.347932691477144	0.038980614517588046	0.9696460393675514	0.990214	-5.93325	22.249872981463916	22.326615791475852	22.42057241407223	22.34441222748532	22.352671256438704	22.30560445246407	22.272345723164968	22.38268526700418	22.28209335829253	22.41541260640612	22.478446561416305	22.34445965804153
Con_Pmod_vs_Con_Scr	O14880	MGST3	0.12064332917809395	20.233963912869143	1.842265524003269	0.0941773	0.6431153643512275	-4.45082	20.238709489621748	20.314171359928228	20.202183617397665	20.32296487195303	20.41592388372171	20.378105698807165	20.10171855216752	20.157727576551626	20.343154826537507	20.170814886314172	20.167145741346427	19.994946450082903
Con_Pmod_vs_Con_Scr	O14893	GEMIN2	0.018370641620983008	15.724353036979402	0.6087101110902909	0.5558140239430591	0.8843282053568271	-5.74838	15.725646580337347	15.617918940495592	15.65295436059483	15.686839678493698	15.693206301445688	15.671585826351336	15.787457003685324	15.74286941119068	15.792856960549983	15.78035802037547	15.734038146757303	15.806505213475564
Con_Pmod_vs_Con_Scr	O14907	TAX1BP3	-0.0406899	22.250183661453285	-1.1862	0.2620082750507505	0.745857	-5.26344	22.14667265763086	22.279764916498824	22.19677170004377	22.152782208728095	22.20646271957863	22.1419	22.33566055990432	22.32079856831154	22.38012658394497	22.266800460460686	22.30970319116613	22.264765766508088
Con_Pmod_vs_Con_Scr	O14908:Q8TF64	GIPC1:GIPC3	-0.00319499	23.643674214370968	-0.0874866	0.9319509988116935	0.9854296731349035	-5.93012	23.632255720014445	23.68637933862027	23.64511770024163	23.67492659994548	23.668746865761868	23.610494312377263	23.5676	23.662487488818503	23.644930584367273	23.64357443573852	23.58121771039811	23.706397477114734
Con_Pmod_vs_Con_Scr	O14910:Q9HAP6:Q9NUP9	LIN7A:LIN7B:LIN7C	0.018778872887519782	18.75631915323837	0.9790453755368246	0.34984322262203205	0.802261	-5.46742	18.735550862758004	18.77113520006679	18.75485189932611	18.778746094496995	18.785309653341233	18.75381883297521	18.701328593807883	18.7188	18.71316006550344	18.780249123891565	18.773987664991925	18.808913413246167
Con_Pmod_vs_Con_Scr	O14920	IKBKB	0.0172821	21.74994313560887	0.6439877658635181	0.5335658567703956	0.8747840053513282	-5.7267	21.69049076251028	21.744792520462152	21.771715392156555	21.76855376162865	21.737265273040386	21.753025944753496	21.760671805230764	21.789579072879388	21.730596732859265	21.74087965099188	21.78516823018572	21.726578480607905
Con_Pmod_vs_Con_Scr	O14924	RGS12	-0.0802193	10.805193103688776	-1.94118	0.0798835	0.6146169983214856	-4.31208	10.59455293158627	10.66242592156916	10.515800998538536	10.450878123694867	10.509355796440252	10.571888174188723	11.075369400600811	10.985025949274489	11.023880759978251	11.079923348837376	11.11235124781676	11.080864591739813
Con_Pmod_vs_Con_Scr	O14925:Q5SRD1	TIMM23:TIMM23B	-0.0457492	18.219977702841565	-0.540318	0.6003876861124327	0.8998221855521492	-5.78717	18.33848469145558	18.21952038731996	18.091013528129498	17.983865788636958	18.219925541999288	18.307979817462805	18.33100350078637	18.1542	18.16459056478722	18.29008035856894	18.292581800703985	18.246495321908068
Con_Pmod_vs_Con_Scr	O14929	HAT1	0.019745336094828758	14.250010337302353	0.754188	0.467515	0.8479055457704144	-5.65184	14.235786088294295	14.193459184972635	14.22102491008329	14.242880430876731	14.24657030687285	14.22005545388513	14.240620402637544	14.205102982227205	14.184359442257488	14.319618516305995	14.302993726459375	14.3877
Con_Pmod_vs_Con_Scr	O14933	UBE2L6	0.040956173514981487	22.419952676887938	0.48157876413320366	0.6401056423103637	0.9143713518115782	-5.81701	22.3037	22.33130609102016	22.528834510562486	22.442781439160377	22.3685	22.475430704026618	22.54363233907994	22.623753405736984	22.317213882512288	22.344155545402963	22.483163015592865	22.27688759101438
Con_Pmod_vs_Con_Scr	O14939	PLD2	-0.0238553	12.61761491346762	-0.431573	0.674886	0.9245835873384326	-5.83983	12.518398580322405	12.591248471654414	12.691475465465388	12.55754978711091	12.6446	12.527359364893112	12.710122848793654	12.63120254981809	12.604972357799268	12.606258794835837	12.745023924210097	12.58311926360716
Con_Pmod_vs_Con_Scr	O14949	UQCRQ	-0.0479171	19.85	-0.840319	0.4196802747551547	0.8346648261564055	-5.58606	19.949290263182142	19.829004750206916	19.909802213256025	19.937310506233363	19.73779726485787	19.86923805752263	19.920822732538664	19.92467204916902	19.827691139915153	19.750295965423295	19.693383922919896	19.851209805952223
Con_Pmod_vs_Con_Scr	O14964	HGS	-0.0146139	22.489172257298687	-0.608521	0.5559348830299263	0.8843282053568271	-5.74849	22.478710695164704	22.470408241180905	22.438830564249436	22.451607002976417	22.46315010612209	22.429350558243396	22.5137	22.506190936947107	22.560232927769224	22.521931385293627	22.485703228937975	22.55029955009498
Con_Pmod_vs_Con_Scr	O14966	RAB29	0.018346595429356682	21.242012263096868	0.5857075406958083	0.5705972922037739	0.8892630255981676	-5.76191	21.208993792188338	21.28247929523294	21.19420978767877	21.23260930590909	21.238282284528257	21.26983107095076	21.20231689830126	21.21441524277029	21.27732372469824	21.276364404852032	21.290526413589276	21.216794936463167
Con_Pmod_vs_Con_Scr	O14967	CLGN	0.1429271931915359	24.177328420881615	3.5177078950136282	0.00526122	0.3731624097602041	-1.91695	23.920045285251582	23.883676845923393	24.000689840124807	24.127041375863204	24.09507242190577	24.011079753105403	24.33029112041142	24.249212330220356	24.34306417092337	24.37602625589058	24.429081014642396	24.36266063631712
Con_Pmod_vs_Con_Scr	O14972	VPS26C	0.040107124615641254	20.050667233048493	1.7355040292054709	0.11221730129121306	0.6617342240505717	-4.59673	20.071476952466305	20.02496698830419	20.034716983145536	20.087272033458895	20.057791867397828	20.106418396906214	20.044093909144873	20.004657669360125	20.047113093628585	20.05337549987466	20.05976358417618	20.016359818718534
Con_Pmod_vs_Con_Scr	O14974	PPP1R12A	-0.00192766	22.441658772235705	-0.0854826	0.9335055146541009	0.9854296731349035	-5.93029	22.450224281985463	22.40635604452508	22.400364308319126	22.405248947027705	22.42828679074898	22.4176	22.437826384431563	22.39206225005841	22.45948367132273	22.50907906865311	22.498431231738603	22.494916383425892
Con_Pmod_vs_Con_Scr	O14976	GAK	0.00843344	22.563811243242075	0.3742134461733781	0.7157831521815552	0.9345001222922931	-5.86304	22.584894991743926	22.568751625509833	22.580634782171646	22.59944864397187	22.6007	22.559434805048525	22.50811202757427	22.50103545084272	22.50494107384224	22.5764	22.55315483361217	22.628185720905204
Con_Pmod_vs_Con_Scr	O14979	HNRNPDL	-0.0652912	12.666846688432676	-1.22871	0.2463330713124563	0.7435648622388488	-5.21793	12.794603845902474	12.645675702096002	12.648791520790224	12.561518114164825	12.659421893312746	12.672257422007872	12.68297979282839	12.52825031187858	12.666868219257694	12.737698550538276	12.7414	12.662665160778635
Con_Pmod_vs_Con_Scr	O14980	XPO1	0.010504054503677196	20.28375397157955	0.39795356622175676	0.6987331360085084	0.9305099451246478	-5.85382	20.219295114478793	20.26054890787409	20.26608893798712	20.29091009228612	20.22111038261557	20.265424648949335	20.317277098154555	20.3777	20.36016408512683	20.284754367262963	20.296290128804035	20.245483277003174
Con_Pmod_vs_Con_Scr	O14981	BTAF1	-0.0235638	14.502908587292508	-1.38212	0.1959753862220903	0.721058	-5.04433	14.523252299769936	14.51709561547874	14.509004606655228	14.480977138275694	14.494664244170114	14.50301986916348	14.53195162497611	14.553611023828823	14.549590461537733	14.467734463909936	14.457343411220055	14.44665828852424
Con_Pmod_vs_Con_Scr	O14983:P16615:Q93084	ATP2A1:ATP2A2:ATP2A3	-0.0350684	24.42707539290384	-0.715644	0.49000963189068636	0.8568540292038318	-5.67923	24.585051657501776	24.567203391699277	24.448922509677782	24.44775176415862	24.553367214898493	24.49485348168584	24.28600378061499	24.179491229411983	24.35662815339132	24.41039615891218	24.374027474392157	24.421207898501677
Con_Pmod_vs_Con_Scr	O15013	ARHGEF10	-0.062077	20.528193737126767	-2.85376	0.016563526585755665	0.4768906246440572	-2.93769	20.468692069186503	20.4931	20.4596	20.40953712473567	20.390074627148117	20.435580647291516	20.695985222175757	20.679334313259535	20.641421548546965	20.541633837208185	20.551655882183148	20.5717
Con_Pmod_vs_Con_Scr	O15014	ZNF609	0.00955733	13.860377840947923	0.28380250752356584	0.7821470190422206	0.9552746233869726	-5.89307	13.922943461311858	13.891460482148288	13.950371713182868	13.87133732754025	13.98200483118708	13.940105502884276	13.767092162348323	13.78280153710458	13.692259116527705	13.84330488564371	13.865812591305254	13.81504048019088
Con_Pmod_vs_Con_Scr	O15020	SPTBN2	0.0508764	24.126771448042895	1.6860225318404343	0.12159763343065984	0.6675657340351365	-4.66286	24.202995281910315	24.17260785522904	24.257412665762818	24.286175273874186	24.22752054682855	24.271949116880837	23.97663849867032	24.03293293524329	23.942273397715944	24.055044283634857	24.06645712000215	24.029250400762436
Con_Pmod_vs_Con_Scr	O15021	MAST4	0.045783687468421874	19.39480483708043	1.6394649773653478	0.13106040039246475	0.6728082648306313	-4.72414	19.388892176167086	19.366312429055604	19.453414467898423	19.45829603125614	19.46112923205312	19.426544872217107	19.39307794002374	19.352224997801866	19.32468906958225	19.353658073891967	19.399747998105543	19.359670756912298
Con_Pmod_vs_Con_Scr	O15027	SEC16A	0.00975272	24.184843048349933	0.2787445270937464	0.7859201283565406	0.9553462631352436	-5.89451	24.13465991294725	24.139797231356777	24.189677969909535	24.1614	24.130752824504963	24.201206328435504	24.24111351485562	24.29915973926406	24.216889936158683	24.181811145367032	24.220588678263734	24.101025188264337
Con_Pmod_vs_Con_Scr	O15031	PLXNB2	-0.00970251	23.992416440507533	-0.396224	0.6999695856219299	0.9313927082650366	-5.85451	24.04066451953769	24.11737216298958	24.078778454158183	24.05173242416261	24.07275810618561	24.083217063603968	23.87519931300065	23.91906720595024	23.865798556614106	23.931583942837715	23.953074955331807	23.919750581718265
Con_Pmod_vs_Con_Scr	O15033	AREL1	0.11018129470981286	15.350460230495973	1.7296316109838252	0.11329529881622068	0.6629873041838099	-4.60463	15.30453543096876	15.197942465375997	15.349287899585718	15.369192447919051	15.429868940581567	15.3832	15.300135480456238	15.29390046004542	15.3946	15.44584651482994	15.50072286039794	15.236234040622543
Con_Pmod_vs_Con_Scr	O15037	KHNYN	-0.0940502	17.732541978469285	-2.24145	0.0479756	0.5464537798112606	-3.87421	17.790929078299538	17.679882610921208	17.718984757757283	17.612152288763944	17.64755850843203	17.647935186760975	17.888345184519242	17.713381058817028	17.771045066727094	17.75339366989928	17.780871703616263	17.786024627117527
Con_Pmod_vs_Con_Scr	O15040	TECPR2	-0.101422	14.295684630532772	-1.68532	0.1217350553384415	0.6675657340351365	-4.66379	14.239746082548622	14.531135364476077	14.334438473182162	14.224862123185144	14.309751756585715	14.266438951423083	14.326378003979697	14.317148732716742	14.322382144957505	14.18640971684536	14.28047737952596	14.209046836967191
Con_Pmod_vs_Con_Scr	O15042	U2SURP	0.00402234	18.801132291175453	0.182096	0.8590176597110004	0.9700238487574436	-5.91712	18.77962663073798	18.769708137377595	18.79736481855504	18.766005756922095	18.78938528381029	18.80337556628246	18.828598285088898	18.861911682384743	18.811689914321384	18.81165278461564	18.823154090504875	18.77111454350445
Con_Pmod_vs_Con_Scr	O15047	SETD1A	-0.0440349	8.978511994013846	-0.727672	0.48291885652298416	0.8524761118687001	-5.67082	8.934386508395594	8.949534056299264	9.079076940808216	8.95881	8.928085110867862	8.944	8.949922312583842	9.130941722558454	9.035953349156728	8.98778	9.023974901363204	8.819685665778346
Con_Pmod_vs_Con_Scr	O15050	TRANK1	0.0950149	17.98386462099871	1.1786147529918523	0.2648857000811734	0.7470827452808014	-5.27143	17.82033271089372	17.840343337025722	17.945288391938803	18.06611484947677	17.959951796258682	17.864942522235324	17.89104250306702	18.209916877504536	18.178272597410253	18.066182752923147	17.95285069457496	18.01113641867555
Con_Pmod_vs_Con_Scr	O15056	SYNJ2	0.022035893850443244	20.666175111550768	0.8654884976227691	0.4063461356517749	0.830413	-5.56567	20.60486642628425	20.585569091983743	20.641116269707613	20.663830223623123	20.589095233013783	20.644734012890027	20.73065901749347	20.731878783209694	20.692958660878787	20.699773475375196	20.724786603265052	20.68483354088446
Con_Pmod_vs_Con_Scr	O15061	SYNM	0.00281599	13.545653859004027	0.10523632463517048	0.9181959106549664	0.9825557355102871	-5.92837	13.329257095479637	13.321652714909511	13.373563251714112	13.3227	13.368196970868496	13.341990519029498	13.799545491209845	13.760302805808411	13.737015111046473	13.721667602973138	13.772754796240052	13.69916639284124
Con_Pmod_vs_Con_Scr	O15062	ZBTB5	-0.0354511	7.921247907565761	-0.467953	0.6494978591253002	0.9178950066350396	-5.82347	8.014698082678738	7.876043837117252	8.027864380948536	8.085710801280026	7.762077667517012	7.96446	7.766676184680887	7.8928285860844065	7.899478066786502	7.976796555749541	7.927585949509613	7.860750231754026
Con_Pmod_vs_Con_Scr	O15063	GARRE1	0.00611739	16.029080511313623	0.21932353379017636	0.8306545161991878	0.9662210520403934	-5.90952	16.02463754081759	15.964904301214052	15.97424908776607	15.957250720274438	15.982262884780706	16.042629483750865	16.029881288488486	16.048653215419833	16.011560020794413	16.127099168604065	16.115650593751887	16.070187830101087
Con_Pmod_vs_Con_Scr	O15066	KIF3B	-0.0212838	16.19067725070194	-0.794379	0.44477229582599664	0.8455430543643947	-5.62192	16.17474734084029	16.158873391309143	16.160442790022564	16.114646127924633	16.14735391525185	16.168212089280964	16.258744127510123	16.242175352984148	16.27295148294356	16.213725623407868	16.237930611309118	16.138324155638994
Con_Pmod_vs_Con_Scr	O15067	PFAS	1.7919749887340686e-4	19.95904511311599	0.005801	0.9954815674374401	0.9988827629439886	-5.934	19.996913688983348	19.979184761831736	20.035302681811437	20.001047043580257	19.97329123458307	20.037600446959814	19.930594930708196	19.981875919982233	19.88618815311693	19.90500224191703	19.92760003348136	19.853940220436467
Con_Pmod_vs_Con_Scr	O15069	NACAD	0.048494284651354747	18.900897627092057	1.5905819265721308	0.14169613111228616	0.6895948257966394	-4.78746	18.79133004657318	18.81146211357394	18.860460302468464	18.85570918311352	18.86933553993468	18.88369059352143	18.891711158887063	18.94746898183114	18.85944420536734	19.018322615221713	19.05481318385099	18.96702360076122
Con_Pmod_vs_Con_Scr	O15075	DCLK1	0.013824897279388182	21.908675163933164	0.21008827217271395	0.8376688076132242	0.9669323985043351	-5.91154	22.002934175752628	21.835380214675833	21.99360801912441	21.93929313672685	21.91585781804461	22.018246146619575	21.87676634052269	21.768770318830413	21.600209295796912	21.95676995294642	22.008114305145227	21.9882
Con_Pmod_vs_Con_Scr	O15078	CEP290	0.0693477	15.030528817363784	2.01684	0.0703446	0.5968378965966202	-4.20392	14.996191305722466	15.006934645074882	15.04889579562544	15.10633545038569	15.089551706004205	15.064177614384862	14.963001705033207	15.071347954889584	14.952930688010742	15.01837357649453	14.981809878252877	15.066795488486935
Con_Pmod_vs_Con_Scr	O15083	ERC2	-0.0203821	14.296557996606657	-0.39393	0.7016106940356193	0.9313927082650366	-5.85542	14.315175554457992	14.400915073765262	14.404635643746968	14.34530004422257	14.38167409974004	14.332605769919642	14.207052314294009	14.089103093105631	14.211944315456822	14.27498841583416	14.401391212482157	14.19391042225462
Con_Pmod_vs_Con_Scr	O15084	ANKRD28	0.029847120863692567	17.649174866738647	0.994009	0.34284386628100805	0.7955678489745324	-5.45373	17.590811957865682	17.572991528861046	17.6461	17.647482690836295	17.601509249851127	17.650416748824796	17.694094407085252	17.748794742034594	17.65796826498527	17.6659	17.686198518797276	17.627895138968647
Con_Pmod_vs_Con_Scr	O15085	ARHGEF11	-0.00644347	17.67026970110532	-0.297557	0.7719164106217414	0.9536181457104492	-5.88902	17.65821769254565	17.644954153216734	17.626968910060384	17.655835981435345	17.60267432906401	17.652300037279172	17.712197674325928	17.679967999560493	17.686317193698326	17.70010452262102	17.693458710929406	17.730239208527365
Con_Pmod_vs_Con_Scr	O15091	PRORP	-0.0159606	18.159790285415355	-0.652766	0.5281113285240924	0.8711998946186303	-5.72113	18.15665239361376	18.198045932936076	18.18073204391727	18.15439520811987	18.15301618470709	18.1801	18.0632	18.144712773979155	18.06771282419309	18.213294990833543	18.20555217543767	18.199990569822937
Con_Pmod_vs_Con_Scr	O15111	CHUK	0.00245686	19.0724	0.12646851340602014	0.9017794403396716	0.9784162001402956	-5.92586	19.15062573568504	19.1681	19.184193460806213	19.18526445882657	19.172405629528495	19.1526	18.987505972966183	18.976687916159964	18.95805852203423	18.961681114593876	18.97436192541498	18.99691376437696
Con_Pmod_vs_Con_Scr	O15116	LSM1	7.815344590511586e-4	20.743212192426288	0.0355905	0.9722845934687525	0.9911030049552444	-5.93338	20.682150152240084	20.733184155202903	20.70364276403059	20.692789076661494	20.71533177123831	20.713200826950935	20.80066921072389	20.760357405088683	20.77044276290368	20.76927071085447	20.811786188816686	20.765721284403742
Con_Pmod_vs_Con_Scr	O15118:Q7Z442	NPC1:PKD1L2	0.021220460637874083	22.40742602188467	0.8452849084969352	0.41702639715159795	0.8326474820971248	-5.58208	22.300865510978337	22.283108210898806	22.297	22.356683498518457	22.29231070863943	22.295594508266984	22.517860546874644	22.467414750611375	22.547595291167237	22.506028972891663	22.51086012587192	22.51383652626309
Con_Pmod_vs_Con_Scr	O15120	AGPAT2	0.031618755082313044	23.391570712340656	0.87669	0.40050601036261946	0.8282689998888321	-5.55644	23.42068326967802	23.487506659077212	23.379880939727745	23.46039054832421	23.46639110763137	23.456145477774324	23.345870262778032	23.38672073826466	23.482939565156165	23.291221902040387	23.25500821233463	23.266089865301097
Con_Pmod_vs_Con_Scr	O15121	DEGS1	0.0253742	21.967722003588168	1.2089698213688977	0.25351468183679815	0.7439648048457665	-5.23921	21.95047333287264	21.94988520097894	21.977206853971374	21.998787560790216	21.98321683119834	21.97168371013244	21.977805575741343	21.984025975336245	21.938920986251585	21.94670135485286	21.94645914373794	21.98749751719411
Con_Pmod_vs_Con_Scr	O15126	SCAMP1	0.022856170305448842	24.479867395290245	0.7782695265697621	0.45379982356981696	0.8479055457704144	-5.63407	24.468428782914053	24.477903034520164	24.48869571486238	24.502831326845456	24.50536031352543	24.495404402842045	24.419526638637972	24.506431269627186	24.523577365402737	24.487744766927037	24.471321302798767	24.411183824579737
Con_Pmod_vs_Con_Scr	O15127	SCAMP2	0.026710758459589812	23.928085677732792	1.2156051304150661	0.25108179193819935	0.7439648048457665	-5.23208	23.874634766603933	23.8563	23.886080177266916	23.897514051469077	23.92972359879332	23.86986636297823	23.97102549908615	23.971601287794968	24.016318268038567	23.9627	23.9587	23.942545191133956
Con_Pmod_vs_Con_Scr	O15144	ARPC2	-0.0766892	26.27597304800346	-3.08956	0.010990220798472039	0.4010316766876676	-2.57272	26.314127863492217	26.320936346585142	26.26396778916527	26.19270055823985	26.23561502594025	26.240648737071492	26.30875641620007	26.240060577773846	26.27277751437827	26.2976	26.306190622388225	26.31825656720359
Con_Pmod_vs_Con_Scr	O15145	ARPC3	-0.0503291	22.634407227596522	-1.44775	0.17723309488166664	0.7117868613415159	-4.96591	22.69923851299685	22.722865567829725	22.67011213755093	22.646296610782255	22.650380579622468	22.644551668472683	22.513967140590417	22.58177050781573	22.663872608054582	22.64217043409344	22.60518609480796	22.57247486854124
Con_Pmod_vs_Con_Scr	O15155	BET1	0.060384	20.656504762134063	0.7774032516322308	0.4542886332095156	0.8479055457704144	-5.63472	20.72906443455277	20.816833926646176	20.872575937386927	20.840339586825124	20.86481064056129	20.89447612034884	20.449923874160746	20.613580916567397	20.584655156529383	20.462083603585818	20.545009652284804	20.204703296159455
Con_Pmod_vs_Con_Scr	O15160	POLR1C	-0.0625035	19.075908427974316	-2.77475	0.0190098	0.4805242302543434	-3.06001	19.0979	19.114235904071677	19.09926225369408	19.056888411544925	19.05482645808375	19.0122	19.07587890497669	19.06796352790696	19.090290924293917	19.069221224935163	19.05206122154118	19.120219180985956
Con_Pmod_vs_Con_Scr	O15164	TRIM24	0.0491873	10.517418391924792	0.8123299168888805	0.43485213845455184	0.8388709933359708	-5.60811	10.50173839018368	10.57366499103466	10.58885858890878	10.601179787252857	10.525224514292647	10.685419669911298	10.478554363139263	10.459195495478896	10.387993893959823	10.46693443212381	10.595872750279195	10.344383826532606
Con_Pmod_vs_Con_Scr	O15169	AXIN1	-0.127778	14.474922904687608	-2.34969	0.039811072774404405	0.5358613997467039	-3.71167	14.490361382761629	14.547933084959698	14.564110026972456	14.35645766314985	14.425494802681897	14.437117853515392	14.573436301979449	14.48118908113089	14.330817852747376	14.442475855422408	14.5472	14.502527803074848
Con_Pmod_vs_Con_Scr	O15173	PGRMC2	0.0674383	24.633582475422386	1.274038830212445	0.23045872422038197	0.7387203027034835	-5.16813	24.649670858515144	24.67835200081937	24.67408775987063	24.81666674528609	24.750272723535204	24.63748596384237	24.561775823607817	24.571032714573448	24.650381255669892	24.51531568299525	24.455397458995787	24.64255071735765
Con_Pmod_vs_Con_Scr	O15182	CETN3	-0.0937663	15.896111950657293	-1.46046	0.17378432444798153	0.7095296467100889	-4.95044	16.003856241421897	15.88682991721828	15.853802267820804	15.86345979977594	15.736587283341128	15.863142415928548	16.105533458647887	16.01200392378172	15.98081372815674	15.788451063026276	15.711623179175646	15.94724012959264
Con_Pmod_vs_Con_Scr	O15211	RGL2	0.0472271	23.16073494560387	0.9863627426646148	0.3464076027844982	0.7978482743530775	-5.46075	22.97968524258116	23.123967657559856	23.078016908405097	23.059982506841767	23.12322329626812	23.1401	23.28233962526936	23.263327252702325	23.191457994192447	23.20561029782597	23.31842322779133	23.162640129325226
Con_Pmod_vs_Con_Scr	O15212	PFDN6	0.0675547	23.128604075731495	0.8739392564770785	0.40193490989971814	0.8288525455299557	-5.55871	23.1158	23.19599739984632	23.18199758984876	23.249198016442985	23.231104184805275	23.21618111883939	22.91532161131103	23.221630975743366	23.23776920578072	23.07999989449457	23.01081356233628	22.887411011713663
Con_Pmod_vs_Con_Scr	O15213	WDR46	-0.0223313	18.540137133557845	-0.736415	0.47780524773675215	0.8506867547580212	-5.66463	18.56655819786456	18.53584459915798	18.48474540602042	18.491666823888895	18.510019358799653	18.51846824300596	18.622717502103296	18.527693960388017	18.58348839659035	18.533976240861865	18.52143894290473	18.58502793110843
Con_Pmod_vs_Con_Scr	O15217	GSTA4	0.0271035	14.877660973951846	0.7300017431568641	0.48155280464437045	0.8522297840403801	-5.66918	14.864114618426823	14.835255240879263	14.832226600848529	14.915731179490551	14.864807609408771	14.832368115674216	14.89357317523938	14.93666415323183	15.038920900498791	14.863241761079856	14.799127907986628	14.855900424657506
Con_Pmod_vs_Con_Scr	O15226	NKRF	0.0334578	18.895114633126383	1.5458682746459085	0.15208431192796926	0.6962778221557382	-4.84441	18.85911852854329	18.878199620019625	18.914383227804453	18.92351559349486	18.926123787844364	18.902435512053145	18.841995207066883	18.891624189208223	18.845313701029585	18.919899577868772	18.92803939037694	18.91072726220645
Con_Pmod_vs_Con_Scr	O15228	GNPAT	-0.0245051	20.147700293866656	-0.831986	0.4241599089286727	0.8348664894343217	-5.59269	20.2057	20.21789966328314	20.14419222891809	20.127011980629185	20.189979519236022	20.17728581094717	20.080997801244564	20.044427788466074	20.1319	20.163722111904093	20.158284425430004	20.131023021238526
Con_Pmod_vs_Con_Scr	O15230	LAMA5	0.0811232	14.951709332747464	1.140047562771686	0.27991099265830244	0.7598714568768212	-5.31149	14.779125155313682	14.909189210184127	14.99813184768048	14.965457335607706	14.96863879512724	14.99571977885074	14.92137688696689	15.044996290950444	14.878604273434515	14.989809678000949	15.117620425469996	14.851842315382802
Con_Pmod_vs_Con_Scr	O15234	CASC3	0.053441557615578006	15.946647273480519	1.9360362224967294	0.0805744	0.6164317941954491	-4.31937	15.944197279853432	15.83816245524224	15.902	15.97225727484543	15.92842698486698	15.944022575650306	16.008023329585377	15.978523606839271	15.997046641693576	15.954522798976672	15.924010225369331	15.9686
Con_Pmod_vs_Con_Scr	O15235	MRPS12	0.0941648	16.064283241273888	2.456733183425517	0.0330734	0.5295630021346133	-3.5492	16.172050500567707	16.127870802038704	16.243329999580382	16.322338280142496	16.228558886715668	16.274848681541812	15.813245903274236	15.91029499259452	15.842521146070505	15.967139429357973	15.968680275945458	15.900519997457192
Con_Pmod_vs_Con_Scr	O15254	ACOX3	0.034926168539257674	24.95103853420611	1.0270249804769684	0.3277663909158106	0.7860226844490517	-5.42293	24.994062346927677	25.081636402910632	25.108612390062575	25.108314080514567	25.112120586791548	25.06865497821253	24.733598994277813	24.823351239294308	24.76752454269727	24.87112177074681	24.902285353631218	24.84117972440636
Con_Pmod_vs_Con_Scr	O15258	RER1	0.0970557	23.078783379614563	3.301074278420848	0.00762463	0.3900080774032052	-2.24707	23.1351	23.048571463045292	23.093781604608225	23.228576716378463	23.158060486071975	23.181984005115332	23.017236574578725	22.98680495270259	23.00478137075571	23.028136821661207	22.99264154997234	23.06972409433432
Con_Pmod_vs_Con_Scr	O15260	SURF4	0.1153947640666626	14.037419003385574	2.0344168905597724	0.068287	0.5958456762521784	-4.17856	14.020354101547484	13.941835920766612	14.099858112048995	14.174987437944608	14.058966825688454	14.17427816293002	14.006943521409376	14.07672210095912	13.859725021618797	14.00516527091533	14.028362646676229	14.001828918121868
Con_Pmod_vs_Con_Scr	O15265	ATXN7	0.031738	10.73048292125986	0.8453585175520434	0.41698714212213706	0.8326474820971248	-5.58202	10.678958095610922	10.654492156417536	10.667226285816866	10.613305291650928	10.791969509337434	10.690615622208718	10.840809082655262	10.80509539108937	10.807853014281196	10.742100291302709	10.759898508306463	10.71347180644092
Con_Pmod_vs_Con_Scr	O15269	SPTLC1	-0.000899404	22.457897936608457	-0.0341574	0.9734	0.9911937356525037	-5.93343	22.443472953087007	22.47535360497731	22.416316232604064	22.447568986099785	22.46372980989853	22.42114578180659	22.48927759155276	22.456508101784056	22.53751448811616	22.442395081964563	22.42768758596363	22.473805021447028
Con_Pmod_vs_Con_Scr	O15270	SPTLC2	0.013344156297090848	22.799013759681806	0.44527374600372516	0.665272	0.9226302981743336	-5.83382	22.79530068373552	22.830666328299404	22.799962423352685	22.835891237487473	22.856656426316313	22.773414240475088	22.76092864627897	22.748027949478345	22.792508176789937	22.782224332256114	22.759598982070138	22.85298568964169
Con_Pmod_vs_Con_Scr	O15287:P11413	FANCG:G6PD	-0.130653	19.813616702630128	-2.30424	0.043061211201450435	0.5358613997467039	-3.78018	20.050941506549904	19.938044770716314	19.866392672793932	19.845600908449097	19.7025	19.915337726247003	19.858932598967662	19.78299939243879	19.865137402401004	19.67006215089998	19.619537541031924	19.647931649707548
Con_Pmod_vs_Con_Scr	O15294	OGT	-0.0204171	21.899619451280074	-0.763217	0.46234185008812523	0.8479055457704144	-5.64523	21.83141873265605	21.883508649244423	21.874093933430604	21.877603503189125	21.82516494739218	21.82500148904014	21.985115106707077	22.012967881495065	21.96509591310607	21.88487096498906	21.881419221302913	21.949173072808165
Con_Pmod_vs_Con_Scr	O15305	PMM2	-0.0419749	23.94133762344078	-1.22949	0.24605211461311038	0.7435648622388488	-5.21708	23.976412318569103	24.005920275869627	23.941302045118935	23.97501509039045	23.912665410179542	23.91002954578981	23.981358836859236	24.008262624468415	24.077236243332138	23.83960023429992	23.785454328382095	23.88279452803011
Con_Pmod_vs_Con_Scr	O15327	INPP4B	-0.0782619	15.690685369776235	-1.59056	0.14170155281137697	0.6895948257966394	-4.78749	15.776045193809464	15.742169166690486	15.630049129915944	15.53695214852542	15.678442957373663	15.698082628162728	15.739454032927318	15.802702068370072	15.753098636346488	15.675090832724791	15.58834939034694	15.667788252121507
Con_Pmod_vs_Con_Scr	O15344	MID1	0.00130955	20.657756978759288	0.0441829	0.9655977541771308	0.989486	-5.93303	20.7092	20.72714366424959	20.740870726965355	20.690267926507172	20.74382534727677	20.74700363792035	20.551660015516273	20.63638686298859	20.56328356013719	20.6143	20.620892737660935	20.54829020718874
Con_Pmod_vs_Con_Scr	O15347	HMGB3	0.049310614433050404	11.760567815471335	1.2502102260286936	0.2386960088621439	0.7398028321863026	-5.19447	11.609139378001158	11.61870796743284	11.70481437974099	11.682237710716771	11.691285447927925	11.707070409829443	11.82849622637376	11.848532600311655	11.77576840391351	11.889165059945832	11.96265632377155	11.80893987769058
Con_Pmod_vs_Con_Scr	O15355	PPM1G	-0.00972657	16.717016207960807	-0.403325	0.6948993923223632	0.9280117729924873	-5.85166	16.792494311389596	16.7574	16.740038462052574	16.74530459387349	16.772070369496824	16.74339707429847	16.6562	16.642435388932142	16.713509821147962	16.69390456387696	16.661281530829147	16.686097865323323
Con_Pmod_vs_Con_Scr	O15357	INPPL1	0.014235177673466382	23.19102870820666	0.7246334454145502	0.48470407504682345	0.8534536834033964	-5.67296	23.17949002350171	23.217656552658976	23.21496946745413	23.235146532701247	23.214485939889173	23.20518910404479	23.125210819325623	23.13269481998871	23.10765028629462	23.205540939040425	23.21492205691171	23.23938795666878
Con_Pmod_vs_Con_Scr	O15371	EIF3D	0.00912701	22.72251161094449	0.2866860967315569	0.7799985728780787	0.9552746233869726	-5.89224	22.71920608667486	22.69155910258714	22.69424278685123	22.751039765815953	22.702415372397382	22.678933863693324	22.73907529917705	22.751396536372962	22.76729139137746	22.71880343094073	22.663067064569557	22.793108630876223
Con_Pmod_vs_Con_Scr	O15372	EIF3H	-0.00363926	21.183010260312216	-0.149816	0.8837832538504968	0.9760192068290906	-5.92258	21.187142145443705	21.187542818663925	21.15798742617373	21.183474358690372	21.188522036196037	21.14975820461634	21.18731529304308	21.186017159617425	21.242230883679433	21.177462635706423	21.14297655886857	21.20569360304755
Con_Pmod_vs_Con_Scr	O15374	SLC16A4	0.12023755474591269	14.28467953587344	2.962952301525152	0.0136948	0.44461226507125134	-2.76858	14.212825453443548	14.15511818614675	14.270614033632704	14.323921447780176	14.323372539025868	14.352	14.22376506831304	14.338218758269758	14.184817495130522	14.363848942997324	14.360411248529196	14.307264906557691
Con_Pmod_vs_Con_Scr	O15379	HDAC3	-0.0527459	16.276432240995653	-2.16956	0.054267	0.5657453488710619	-3.98098	16.27287556485536	16.208057671254437	16.25747343206148	16.168765987429193	16.212535294522628	16.19886783391024	16.326427950178655	16.275118284088155	16.27344797087841	16.373815283065486	16.389029169609927	16.360772450093865
Con_Pmod_vs_Con_Scr	O15381	NVL	-0.00691111	15.903344023328335	-0.239139	0.8156574372684734	0.9630229789071482	-5.90491	15.86410851393981	15.837016197072732	15.895668160835507	15.876362569255654	15.82512600835853	15.87457097410628	15.963414589517608	16.052491861274497	15.960628457470962	15.91146935788968	15.897248780848379	15.88202280937039
Con_Pmod_vs_Con_Scr	O15382	BCAT2	0.021702576887843605	24.106008517408927	0.8374099777244094	0.42124049067818514	0.8348664894343217	-5.58838	24.18733861653907	24.21758984031186	24.24224820649689	24.23369270814242	24.226106636032274	24.252485049836658	23.935147710450615	23.954210823520356	23.910041583446255	24.038026940875845	24.081771705353713	23.99344238790119
Con_Pmod_vs_Con_Scr	O15397	IPO8	-0.0108539	17.49744934541165	-0.462598	0.6532066022832974	0.9192431008934259	-5.82596	17.419297978960394	17.47131828943384	17.42721808342813	17.450199958050934	17.419170557491277	17.415902028923732	17.58872348869423	17.605202730990012	17.600179145477234	17.511508540715955	17.497072412587745	17.56359893018629
Con_Pmod_vs_Con_Scr	O15400	STX7	-0.0345442	20.633685697023857	-1.12024	0.287882	0.7626128729758807	-5.33167	20.687700649118376	20.62353382704008	20.613885273001653	20.588797454041732	20.62832307139979	20.604366688572757	20.65023767847912	20.55073765242062	20.65701422457785	20.66920986831208	20.66370461682007	20.66671736050218
Con_Pmod_vs_Con_Scr	O15427	SLC16A3	-0.0398371	23.795781499640565	-1.10374	0.29465496297527166	0.7694396117931467	-5.34827	23.875102894240214	23.797195664437908	23.764427617298757	23.770716380733862	23.77680250692959	23.769695838826827	23.75320865287065	23.68438383804033	23.814126282047727	23.86239766340797	23.81472376179694	23.866596895055988
Con_Pmod_vs_Con_Scr	O15431	SLC31A1	-0.0173758	22.628562824209546	-0.380971	0.710913	0.933715	-5.86047	22.612322669219505	22.686166334298775	22.520099832782073	22.50706959947769	22.622328142124097	22.637063559744075	22.601061228426136	22.656232775573955	22.682318388713643	22.70123703446983	22.662548202380304	22.654306123304465
Con_Pmod_vs_Con_Scr	O15439	ABCC4	0.0244951	21.51889074409298	0.774743	0.45579157965552475	0.8479055457704144	-5.63671	21.576988589320862	21.569214986397466	21.63820663756129	21.6433	21.573858941179633	21.64070369821284	21.46993692273554	21.499142334907475	21.422956627819477	21.397775198659694	21.435724700990953	21.35884751177646
Con_Pmod_vs_Con_Scr	O15446	POLR1G	0.017527421519321962	17.697975787936244	0.5716216768254876	0.5797553862492222	0.8928006922746307	-5.76995	17.700595299190223	17.66593265084571	17.686818900768788	17.73097038111714	17.677789718659113	17.697169015586418	17.76709856674282	17.739743339545342	17.69564139472718	17.649212993469412	17.629684188876347	17.735053005706426
Con_Pmod_vs_Con_Scr	O15460	P4HA2	-0.00907417	26.61171176810606	-0.429564	0.6763008644295289	0.9245835873384326	-5.8407	26.61164182703776	26.58886226144174	26.576822404677927	26.570943440768225	26.60390263210949	26.57525791059927	26.60394844734617	26.622041091183835	26.65639298847112	26.658309855745216	26.625134897743347	26.647283460148586
Con_Pmod_vs_Con_Scr	O15484	CAPN5	-0.0104396	15.687168741049039	-0.325296	0.7514247308606147	0.9446365168739791	-5.88029	15.687235709402673	15.688279048166832	15.758422351751555	15.746972743823854	15.676545155047878	15.679100441066288	15.64400726961303	15.571353534287727	15.606291338423578	15.709436791246926	15.775152131390886	15.703228378367236
Con_Pmod_vs_Con_Scr	O15498	YKT6	-0.0722067	23.960056051671742	-1.61927	0.13536450884742884	0.6811335158564891	-4.75043	24.090923464601165	23.997640571283892	23.92166242443737	23.86394727084135	23.945658731950804	23.984000232846157	23.99004539212233	23.92410335359864	24.0104	23.958677193080103	23.909314421975008	23.92425325022841
Con_Pmod_vs_Con_Scr	O15504	NUP42	-0.0190173	18.24968802251747	-0.736012	0.4780401967129566	0.8506867547580212	-5.66491	18.287599430360498	18.251	18.244807913937784	18.218356010747428	18.279596175070843	18.22839447118901	18.229705599307128	18.225719174832477	18.221904143825764	18.2686	18.228805425084182	18.311772288640224
Con_Pmod_vs_Con_Scr	O15511	ARPC5	-0.0536406	21.17593536338899	-1.57187	0.14596540060671748	0.694261	-4.81141	21.219059226637647	21.22502374902468	21.186797522389337	21.15262905149931	21.18810015382404	21.129229604254316	21.096322516006495	21.082315662902538	21.21741167441662	21.224094960134263	21.205905054562837	21.184335185015794
Con_Pmod_vs_Con_Scr	O15514	POLR2D	0.00763226	16.70458258309833	0.18989466730366547	0.8530570562174759	0.9700238487574436	-5.91565	16.644480520730944	16.834504653029214	16.73177785257746	16.754716820374455	16.726878185224294	16.752064796953523	16.67073665409382	16.71702999066927	16.677580545905226	16.62761575110231	16.680964631912587	16.63664059460686
Con_Pmod_vs_Con_Scr	O15523	DDX3Y	0.00953717	2.402017193187577	0.0534183	0.9584136555928072	0.9881015666745631	-5.93257	2.954102610635694	3.122177962076794	2.728923504508725	2.94152	3.1822767156315344	2.7100190126969217	1.750091666718628	1.6600505867302218	2.147854323651803	1.8464115685709075	1.601640868783857	2.179137632985757
Con_Pmod_vs_Con_Scr	O15525:O60675	MAFG:MAFK	0.064032	14.72433602357582	1.0431345321036276	0.3205913691401968	0.779059	-5.4076	14.550510871568331	14.701166857001503	14.676330177131474	14.759425609031869	14.680945136087152	14.67973328506509	14.71636508378202	14.98630942896652	14.871576818340596	14.714136666743237	14.669864592919648	14.685667756272402
Con_Pmod_vs_Con_Scr	O15530:Q6A1A2	PDPK1:PDPK2P	-0.0207216	22.26690879108524	-0.878652	0.3994893363805936	0.8278546143007929	-5.55481	22.31312303435221	22.33131219698231	22.29870640525495	22.308311505259915	22.29316026942114	22.279505118474873	22.230758734450557	22.25422866846002	22.252047737434513	22.208743965979128	22.173829722821363	22.25917813413189
Con_Pmod_vs_Con_Scr	O15533	TAPBP	0.00462433	22.80051402624114	0.1440058137158468	0.8882558027337013	0.9760192068290906	-5.92345	22.889903928814206	22.953504751598174	22.954169206027036	22.907027803276527	22.956017778383664	22.94840529259869	22.65865997214603	22.719499326551396	22.671771699392544	22.65953081718028	22.698737055399373	22.588940683525767
Con_Pmod_vs_Con_Scr	O15541	RNF113A	0.016508220532816864	17.48803939393258	0.5570407321434423	0.5893182612094643	0.8973533441280864	-5.77809	17.48556584695989	17.405553102550726	17.51390178077501	17.475649696299655	17.528497332153528	17.450398363430878	17.4809	17.483856251734675	17.48223210996076	17.52595974030308	17.525229044005698	17.49869230745889
Con_Pmod_vs_Con_Scr	O43143	DHX15	0.012634305604514395	18.970175615222114	0.45354370913998837	0.6594997590544834	0.9226302981743336	-5.8301	18.969548501348857	18.923772208630933	18.94607652769688	18.948761956811246	18.954126042599498	18.974412155079488	19.004366873766884	18.903432043579553	18.90904013740778	19.017908252292287	19.049617149687833	19.041045533764148
Con_Pmod_vs_Con_Scr	O43148	RNMT	0.0073243	18.42734010169093	0.18696089446983902	0.855298	0.9700238487574436	-5.91621	18.373344764494327	18.34678562624035	18.442585163845425	18.38890997972136	18.37565753876227	18.42012093064992	18.492071494783225	18.471724152674422	18.362191898086845	18.47077662150016	18.53776623324107	18.44614681629181
Con_Pmod_vs_Con_Scr	O43149	ZZEF1	-0.0662491	20.3256	-2.02291	0.0696272	0.5958456762521784	-4.19517	20.389802086770196	20.421864166509685	20.373113728721272	20.3516	20.310215593608493	20.324258648037937	20.33823673492314	20.24966011953697	20.261987975132385	20.257388792538556	20.269277353908674	20.359880479279507
Con_Pmod_vs_Con_Scr	O43150	ASAP2	0.00466051	24.3186	0.15265986083449243	0.8815958350143251	0.9754351675928808	-5.92214	24.251849903558185	24.25835361993601	24.33635081618403	24.28185776401115	24.315892683593276	24.262785416470592	24.36022182957269	24.33707212591541	24.28135965431028	24.358147950776015	24.41184986548816	24.366976895722622
Con_Pmod_vs_Con_Scr	O43156	TTI1	0.026201360679888097	13.486805515525882	0.4815606574857904	0.6401180794193543	0.9143713518115782	-5.81702	13.358286593472474	13.50851127960312	13.440668100770807	13.403338849816096	13.51417435891413	13.46855684715583	13.523738943991129	13.51733188635641	13.570196779851065	13.517562204227808	13.617207968404609	13.402092373747102
Con_Pmod_vs_Con_Scr	O43157	PLXNB1	0.0405142	17.011404219541326	1.5927003854240294	0.14121984195729662	0.6881926499769561	-4.78474	17.000932236615743	17.06295784181891	17.017236656441806	17.05454647347884	17.065542281417716	17.082580654398118	16.911541798591927	16.996043117451926	16.952164640062282	17.009933790153045	16.99945935984195	16.98391178422367
Con_Pmod_vs_Con_Scr	O43159	RRP8	-0.0102187	18.946385717702707	-0.429295	0.6764902341955263	0.9245835873384326	-5.84082	18.925428762205208	18.95636245759287	18.952915307791955	18.93024257768333	18.92249681622044	18.951311003658393	19.016154019416906	19.01069976515203	18.93967790914563	18.899417969348836	18.92576658073511	18.926155443481793
Con_Pmod_vs_Con_Scr	O43164	PJA2	-0.0224882	16.03167104663641	-0.542204	0.5991341411388653	0.8997130755609909	-5.78616	15.964278486044016	15.944240723508605	16.012110594382552	15.909569432572706	15.96723425734309	15.97636158068594	16.126084280347722	16.063063141994594	15.958153590534682	16.128391640797915	16.202168476353556	16.128396355071555
Con_Pmod_vs_Con_Scr	O43166	SIPA1L1	0.0426731	20.594347841958232	1.8429090944923763	0.0940771	0.6431153643512275	-4.44993	20.534236233602464	20.565194553746956	20.565102779537273	20.613938541208267	20.621735118121116	20.55687914432871	20.58171535168683	20.57933147418206	20.601240605227648	20.62485897444077	20.621841670772486	20.666099656644207
Con_Pmod_vs_Con_Scr	O43169	CYB5B	-0.00752199	19.572063500353163	-0.275303	0.788491	0.9565145261870974	-5.89548	19.580503115800553	19.584027162156296	19.62297682461503	19.558484348313115	19.62663228391657	19.57982448573664	19.551142185069732	19.50830309359572	19.502049642056004	19.574587304224508	19.62578244067302	19.550449118080778
Con_Pmod_vs_Con_Scr	O43172	PRPF4	0.022429752028642724	16.37780028081431	0.6926471070301312	0.5037450589846615	0.8605521265437722	-5.69496	16.327191933425617	16.28469358127645	16.354329030669856	16.342240357872278	16.319053355967487	16.372210087618072	16.436817127636008	16.487559492404678	16.35669836129382	16.418614933811114	16.4214	16.41280742155594
Con_Pmod_vs_Con_Scr	O43175	PHGDH	0.0586678	15.205693091788588	1.0526766850196903	0.31639738272456386	0.779059	-5.39844	14.878232112682095	14.900615992093009	15.005840342133572	14.988951913642987	14.943510455883263	15.028229420637704	15.446430242790589	15.43689072823399	15.318096108002557	15.495580636397252	15.61623845685109	15.40970069211494
Con_Pmod_vs_Con_Scr	O43181	NDUFS4	0.0311126	21.19215142109013	1.0172986948075096	0.33215601582653476	0.7880879403737766	-5.43209	21.142559085806592	21.164636294863215	21.204958206109342	21.192439851720483	21.19054175523796	21.222509649328643	21.187098737226368	21.231449434952424	21.16638585980773	21.20889532870482	21.25157530132145	21.142767548002553
Con_Pmod_vs_Con_Scr	O43187	IRAK2	0.1441495614979278	6.485604168846853	0.7418436332181197	0.4746469293767491	0.8506867547580212	-5.66075	6.274587784624549	6.2949171240676725	6.853315439481643	6.979083672173488	6.593863264859162	6.282322095635002	6.514392602231965	6.946106601229978	6.660918450005714	6.101140010875992	6.0506814654516905	6.27592
Con_Pmod_vs_Con_Scr	O43237	DYNC1LI2	-0.040753	23.319801365341526	-1.11801	0.28879117871665066	0.7633470774518285	-5.33393	23.398369117756648	23.373293665701656	23.30487821193638	23.32655982030414	23.322659053577024	23.305063059755764	23.33616147410097	23.256314909914803	23.375760349366605	23.274730919710247	23.23394332745473	23.32988247451936
Con_Pmod_vs_Con_Scr	O43242	PSMD3	-0.019415	22.65688202595656	-0.883494	0.39698742620202354	0.827785	-5.55078	22.692313925830643	22.66109348085627	22.63382287650701	22.625772526232343	22.651857840364183	22.65135501356541	22.633104769111313	22.594546696343077	22.64830694446527	22.70360344636913	22.68772771562974	22.699079076204303
Con_Pmod_vs_Con_Scr	O43252	PAPSS1	0.016183	19.075876915892305	0.6682202725264947	0.5185876000408138	0.8653268801432026	-5.71115	19.151282960005556	19.158349408733983	19.122664501739894	19.169519254690663	19.173146241430967	19.138180437988133	18.964153811932466	18.96523845781557	19.011588455779997	19.018464242290904	18.983473211152265	19.054462007147265
Con_Pmod_vs_Con_Scr	O43257	ZNHIT1	0.0490252	10.947492589199266	2.0706119534167597	0.0642277	0.5864790431649262	-4.12608	10.892023630174418	10.878385992987065	10.825398085515012	10.90645255352313	10.899155811534282	10.937275032857093	11.076512539344527	11.037659222512326	11.063544661283284	10.949173790269398	10.930353078615132	10.973976671775524
Con_Pmod_vs_Con_Scr	O43264	ZW10	0.00238255	21.99850662305945	0.1192831374042279	0.9073300878393556	0.9806197913976971	-5.92676	22.00374519485513	22.01842468392518	22.051329490774098	22.045795856737698	22.016597019636393	22.018254148620738	21.95309874214424	21.97842735183174	21.94329562360761	21.979917096369064	21.993997426842455	21.979196841369017
Con_Pmod_vs_Con_Scr	O43286	B4GALT5	-0.0416	15.559701339005713	-0.505179	0.6239951010764814	0.9092250255657002	-5.80541	15.768756961028902	15.981045027627104	15.866391681749004	15.904109016771416	15.858199379770396	15.729085337422372	15.291272213206993	15.321615346304998	15.249102390517841	15.16558516273953	15.13302290932896	15.448230641601048
Con_Pmod_vs_Con_Scr	O43290	SART1	0.026519078748627578	18.616251095751082	1.0061775870481824	0.337228	0.7900146433675638	-5.44247	18.54988139135351	18.55355785890084	18.59559106230204	18.592782252403396	18.574060557985845	18.611744738413016	18.659323117009308	18.659678947480653	18.61820722395402	18.659686774742465	18.704887230357908	18.615611994109972
Con_Pmod_vs_Con_Scr	O43292	GPAA1	0.010907527037335996	20.319411605811936	0.26507239921327447	0.7961478725524593	0.9577068342744185	-5.89828	20.302551526103706	20.231265872686183	20.209296968982915	20.250789994186807	20.275505981555668	20.249540973142334	20.467255527637093	20.313115197900473	20.40251323925085	20.352903193935052	20.341037007701857	20.437163786660285
Con_Pmod_vs_Con_Scr	O43294	TGFB1I1	-0.0719415	17.84112595364762	-1.1959	0.2583627160759549	0.7439648048457665	-5.25316	17.91300916150285	17.887430768210415	17.893099871661047	17.714242521593206	17.842446293996552	17.921026583447727	17.776940844712655	17.722613322419477	17.640668210224337	17.93864642892248	18.023815652776875	17.81957178430383
Con_Pmod_vs_Con_Scr	O43299	AP5Z1	-0.0555314	17.463527849558215	-2.30984	0.0426472	0.5358613997467039	-3.77175	17.477967515019422	17.520655534813976	17.51836162001172	17.43942463422209	17.484859153036204	17.426106713982563	17.413160973421352	17.472965060531774	17.464161469155556	17.455606643849247	17.451216091913885	17.437848784740783
Con_Pmod_vs_Con_Scr	O43310	CTIF	-0.0555839	19.085763398509062	-1.13819	0.28065013301807773	0.7598714568768212	-5.31339	19.090471795809037	19.090312715587014	18.99950149960008	18.99970143579597	19.049003862781632	18.964828971532626	19.10807023521706	19.154408167345274	19.224480029582818	19.127276778298555	19.01761299916276	19.20349229139591
Con_Pmod_vs_Con_Scr	O43314	PPIP5K2	-0.0258086	21.030409048042973	-1.36197	0.20205586777859896	0.721058	-5.06793	21.023755468215725	21.003117845291023	21.017900700421222	20.96531409842078	21.003984439441215	20.99804980241137	21.092968326736308	21.08224967948008	21.055294358181612	21.039855280921017	21.04636655983973	21.0361
Con_Pmod_vs_Con_Scr	O43318	MAP3K7	0.00972488	20.83008855725129	0.4817190024238508	0.6400093192559927	0.9143713518115782	-5.81694	20.77412824275608	20.793895282840023	20.792475183392167	20.811629907778823	20.796042801992648	20.78200063700761	20.863862407798788	20.871927231854812	20.84584301447737	20.863169015770197	20.857033348953816	20.909055612393143
Con_Pmod_vs_Con_Scr	O43324:C9J1V9	EEF1E1:EEF1E1-BLOC1S5	-0.00310999	20.794971610667268	-0.126644	0.9016442721648957	0.9784162001402956	-5.92584	20.81671030680581	20.81149098164185	20.77316049254536	20.80786643072338	20.80041668604198	20.783748708172787	20.766185657752967	20.76095912665431	20.805800178234463	20.804771285606208	20.765170220643096	20.8434
Con_Pmod_vs_Con_Scr	O43353	RIPK2	0.0260382	20.06091245569188	0.8413567434146019	0.4191248849773396	0.834027	-5.58523	20.128992015730184	20.14044984461432	20.192769273338214	20.21777097896884	20.144709387296043	20.17784547038853	19.9225	20.024620554941013	19.963912802276926	19.953880400934047	19.949378010950905	19.914168539767655
Con_Pmod_vs_Con_Scr	O43390	HNRNPR	-0.0231032	19.832339851181008	-0.815556	0.4330849500782473	0.8383377081920187	-5.60561	19.836329442595247	19.817632149981065	19.795319747486463	19.762091071326807	19.77088195669766	19.846998763517604	19.89033623863155	19.862319656560157	19.809125844115673	19.863181715586336	19.87651598300652	19.857345644666992
Con_Pmod_vs_Con_Scr	O43395	PRPF3	0.024056653227070512	17.609720801991084	1.0306996131513857	0.3261192783121323	0.7841420591137168	-5.41945	17.555829526851056	17.559496676169374	17.596568946564812	17.583218764242716	17.59595166343781	17.604894681585925	17.634389778735645	17.647033535260025	17.607173653803144	17.646452028974412	17.679552299432473	17.606088068835636
Con_Pmod_vs_Con_Scr	O43396	TXNL1	0.0378651	21.605476370252003	2.151640430737411	0.055954338910997665	0.5667170223036943	-4.00742	21.57329000262975	21.558711591673013	21.56830267273863	21.608881837742643	21.60497421675455	21.600043442328083	21.56693941900374	21.60200580718615	21.597791544154266	21.671664870097157	21.649515544113044	21.663595494603022
Con_Pmod_vs_Con_Scr	O43399	TPD52L2	-0.0937607	26.360510800254918	-1.87199	0.0896507	0.6348772667138852	-4.40947	26.45977589363754	26.471123339526805	26.31673800204123	26.25902819256664	26.369022716882125	26.33830420742756	26.340319485760908	26.316686921791103	26.46256007071694	26.359411458656435	26.299145111559344	26.33401420249239
Con_Pmod_vs_Con_Scr	O43402	EMC8	0.040164025204539655	22.55921138143539	1.8882758671633457	0.0872572	0.6282415473870255	-4.38669	22.566315425866183	22.57902802952212	22.58661073807707	22.6045	22.643528511829658	22.604390911751743	22.48381197763784	22.48915509339592	22.519353291959547	22.552426410074872	22.56618452227377	22.515204819338372
Con_Pmod_vs_Con_Scr	O43414	ERI3	0.0412262	21.662146628917878	0.9101176292097498	0.38342503537694794	0.8229718328203356	-5.52827	21.508520100487743	21.59989508671425	21.646683604362178	21.67402451200082	21.573437549688663	21.631315201509125	21.709235205354183	21.82286625051001	21.678485618690587	21.690385393168896	21.733236714731937	21.677674309796146
Con_Pmod_vs_Con_Scr	O43422	THAP12	-0.121478	18.08697564033561	-1.20025	0.2567392073261918	0.7439648048457665	-5.24852	18.07116429332273	18.13036950203349	17.86410397471446	17.832533386816078	18.040805413072594	17.827865796813057	18.12598679698492	17.996531925831906	18.375778828594775	18.273475894293576	18.173878003707458	18.331213867842248
Con_Pmod_vs_Con_Scr	O43426	SYNJ1	-0.00666725	18.61792661304083	-0.266209	0.7952963028053813	0.9575475510121665	-5.89797	18.585713661092683	18.62368103884461	18.6369	18.65017376496283	18.596829236318772	18.579321790609445	18.619976801171248	18.65141642197926	18.628407463777393	18.600726374237674	18.59716620615354	18.644774765233915
Con_Pmod_vs_Con_Scr	O43432	EIF4G3	-0.0544078	22.59355071787089	-2.53029	0.029105082597224313	0.5084436347853483	-3.43675	22.608440553749535	22.645471092411626	22.595932811631194	22.573056674266123	22.542765208891197	22.57079917787405	22.624246542202545	22.662244021100513	22.67612388990027	22.549685859304457	22.531426264073584	22.542416519045577
Con_Pmod_vs_Con_Scr	O43447	PPIH	0.013180369842213935	17.51980611628856	0.4294037128775503	0.6764136685034301	0.9245835873384326	-5.84077	17.418740773602202	17.448606364396163	17.491370976445214	17.493891296104884	17.4485	17.45586634082704	17.55508033905091	17.572588094911545	17.59599995118623	17.59292258765081	17.637723548264713	17.526381535984704
Con_Pmod_vs_Con_Scr	O43464:P83110	HTRA2:HTRA3	0.00974692	20.909704572769527	0.3738262432842916	0.7160626269225305	0.9345001222922931	-5.86319	20.807113657015815	20.878753361286464	20.87696586413872	20.86134048134072	20.861871966532306	20.868861201460557	20.967451027713025	20.996261672661227	20.94853768655655	20.942651322697845	20.987137563919255	20.919509067911857
Con_Pmod_vs_Con_Scr	O43488:Q8NHP1	AKR7A2:AKR7L	0.0172385	20.209902251037924	0.5819114049777262	0.5730575827206512	0.88981	-5.76409	20.11270227626404	20.143626794188755	20.19185618464672	20.196573961909852	20.12973718427493	20.173589540609992	20.25367380819383	20.296843566007716	20.23353778477353	20.259731908062687	20.298	20.22899960441033
Con_Pmod_vs_Con_Scr	O43493	TGOLN2	-0.143137	15.491628470442425	-1.28289	0.22745736820817028	0.7387203027034835	-5.15825	15.228527965588857	15.229343757718294	15.003536618262425	14.962838327241002	15.09213005743027	14.977028285838465	16.074735119407002	15.61100317137564	15.962091850336025	15.836993236770676	15.863560455880272	16.05775279946017
Con_Pmod_vs_Con_Scr	O43504	LAMTOR5	-0.0852367	21.105686846130975	-2.15652	0.0554897	0.5664540192934598	-4.00023	21.129380592799983	21.13394730522959	21.057626970990206	20.945823652998403	21.078436261683795	21.04098480079375	21.17398737838276	21.05977019787137	21.092457760011374	21.16663566519667	21.185533390110574	21.203658177503225
Con_Pmod_vs_Con_Scr	O43505	B4GAT1	0.0616248	14.999783422277362	1.6401068427838317	0.13092559609736684	0.6727084736593909	-4.72331	14.983654905076412	15.02829205067646	15.100517580297469	15.110782042295424	15.13493582229741	15.051620971487994	14.944149082170648	15.010901496374393	15.00704251931654	14.883681466117944	14.919544850238845	14.822278280978818
Con_Pmod_vs_Con_Scr	O43516	WIPF1	0.10643712287784979	18.301918111531947	2.620443025025444	0.024877538390068406	0.505369	-3.29825	18.046048645769552	18.069218034056178	18.18885778146555	18.262831169241664	18.200456955278376	18.160147705404775	18.426691527500576	18.504489399195077	18.4398	18.437045729448432	18.469991344004107	18.417463405523392
Con_Pmod_vs_Con_Scr	O43520	ATP8B1	0.012767174549317417	21.719927886311325	0.18441131664998855	0.8572469936383836	0.9700238487574436	-5.91669	21.80362554545255	21.88550153952039	21.756200299423856	21.820157211110583	21.940632433857346	21.722839263076825	21.57691236155685	21.54064280155395	21.69197790644474	21.609454231007373	21.53343581242633	21.757755230305083
Con_Pmod_vs_Con_Scr	O43524	FOXO3	0.0246091	15.036791356536435	0.46701147068023596	0.6501489591831514	0.9179029189420586	-5.82391	14.87007240348561	14.882797459180788	14.998935449197672	14.968784304425222	14.887590666037024	14.96925759228311	15.14261627821458	15.279723819723545	15.09831070815323	15.126151799894064	15.167411708026542	15.049844089815842
Con_Pmod_vs_Con_Scr	O43567:Q8WWF5	RNF13:ZNRF4	0.0170412	20.828630091205014	0.7024998767153898	0.49783180663680193	0.8599001604693735	-5.68828	20.85489772483776	20.91074501007118	20.92599281372489	20.912523443753106	20.934259514359063	20.89597611591068	20.70621832179612	20.748531952828387	20.693302979353067	20.77769048771108	20.799784000749483	20.78363872936536
Con_Pmod_vs_Con_Scr	O43572	AKAP10	0.011016648983790844	18.7113	0.377907	0.7131197344951412	0.9345001222922931	-5.86164	18.664309544589663	18.72481595388488	18.714846195881773	18.7234	18.721410966354632	18.69218918065796	18.679292473782315	18.79054851553004	18.73151215888956	18.703466874861647	18.677973543277247	18.71187854183597
Con_Pmod_vs_Con_Scr	O43583	DENR	0.00844859	21.558603902136078	0.20795508155819917	0.8392911284184641	0.9673912632688748	-5.91199	21.42575699391665	21.512638578039468	21.5443	21.55718077377411	21.478619329815977	21.47221203328121	21.64164361959249	21.760586632290995	21.73440925679385	21.535275342337037	21.55212246875868	21.488531011213475
Con_Pmod_vs_Con_Scr	O43592	XPOT	-0.0219949	18.379515051292003	-0.926632	0.37517803683386564	0.8200318549823761	-5.51403	18.38618596146426	18.342314215413797	18.3532	18.330339670890435	18.307178633732715	18.378223958241545	18.41163318017462	18.43569748604111	18.39131062279624	18.42011405872192	18.40692201294305	18.39103408787385
Con_Pmod_vs_Con_Scr	O43598	DNPH1	0.0737749	18.831800646592256	0.8440959986052661	0.4176607788395892	0.8331030125932716	-5.58303	18.862389516516664	18.951078355756376	19.107974272610683	19.133978469997516	18.9387	19.070047619608417	18.65241400733253	18.710585638371413	18.395706261841124	18.65781108691047	18.78608596045532	18.714795888822568
Con_Pmod_vs_Con_Scr	O43615	TIMM44	-0.00714463	21.078219544698236	-0.386667	0.7068180202168839	0.9321973889337868	-5.85827	21.14457961768893	21.151770275853497	21.142378726546017	21.148266817116863	21.14518644756349	21.12384146264356	21.011752232246327	21.00943196923496	21.05297472638886	21.00597102474698	20.999049723024864	21.00343151332446
Con_Pmod_vs_Con_Scr	O43617	TRAPPC3	-0.0476058	24.915146846469206	-1.17758	0.26528005654731157	0.7470827452808014	-5.27252	25.005619865363283	24.991928317196873	24.90515470347995	24.84782482774201	24.983923179162797	24.928137373726308	24.884074462885977	24.88517389895518	24.972482432175383	24.888237972815293	24.84101072281234	24.84819440131509
Con_Pmod_vs_Con_Scr	O43633	CHMP2A	-0.00417097	18.271289210069078	-0.184517	0.8571658652238286	0.9700238487574436	-5.91667	18.22140340919397	18.210735792820063	18.249640423944268	18.215048187137565	18.220117004794027	18.234101517329453	18.28792308100585	18.29603465779813	18.276427460483117	18.355472170527115	18.382910182647077	18.305656633148317
Con_Pmod_vs_Con_Scr	O43639	NCK2	-0.0379579	18.283807514327627	-1.43094	0.1818817121193761	0.7137532972740651	-4.98622	18.20677237486125	18.223949973079325	18.231383255937168	18.219594949857747	18.135745107877533	18.192891918647327	18.41948675925894	18.39514196219642	18.35323231259743	18.320292301722137	18.341604510539835	18.365594745356415
Con_Pmod_vs_Con_Scr	O43657	TSPAN6	0.14923889653150368	18.49483877502685	2.5216051449084476	0.0295482	0.5120248184846236	-3.45006	18.376290653165128	18.48928857909657	18.556947013922123	18.661830388460334	18.58376725722392	18.624645290094076	18.34886228060485	18.446911789206688	18.39051626105426	18.496619712963508	18.59541842638397	18.36696764814679
Con_Pmod_vs_Con_Scr	O43660	PLRG1	0.027236923412431224	15.383451794554167	1.3292292627739086	0.21227135475146433	0.7301641665616407	-5.10578	15.390621946663774	15.335047421686731	15.36242690701042	15.391450236879436	15.389037273215994	15.389319535502786	15.356978542699627	15.387822987219089	15.381184989467783	15.420630389436845	15.383543920744255	15.413357384123264
Con_Pmod_vs_Con_Scr	O43665	RGS10	-0.0438524	14.758493150367526	-2.13968	0.0571085	0.567391	-4.02504	14.812041351079834	14.825159114451072	14.793769048125236	14.754229515983232	14.762633781389557	14.782549017609874	14.824579871345891	14.772097573981553	14.803918670334346	14.651402493209709	14.675344190391144	14.644193176508864
Con_Pmod_vs_Con_Scr	O43670	ZNF207	0.0548855	17.55981058824388	2.1312394765910856	0.057936155185422014	0.567391	-4.03744	17.507010534330234	17.504183117245383	17.57396845622848	17.60388904414364	17.57328049415086	17.572649193239236	17.54036528525123	17.575434511572457	17.544581228761526	17.578661983685173	17.60433716074141	17.539366049576937
Con_Pmod_vs_Con_Scr	O43676	NDUFB3	-0.00719486	20.36976700032041	-0.274786	0.7888774272514703	0.9565145261870974	-5.89562	20.42659031744952	20.441745207107445	20.381866927077496	20.39189574395152	20.39581517062552	20.440906956913167	20.294870336637967	20.291700963180368	20.343426025892512	20.36073800993313	20.36023358915644	20.307414755919872
Con_Pmod_vs_Con_Scr	O43677	NDUFC1	-0.0261394	22.492484695375893	-0.293546	0.7748955608092769	0.9541895079314293	-5.89022	22.724341760583723	22.628452447414137	22.47108595812904	22.471175846035532	22.512062883886145	22.76222320597143	22.252963558673507	22.37817960874943	22.39211384173871	22.547122282760636	22.44853128737771	22.3216
Con_Pmod_vs_Con_Scr	O43678	NDUFA2	0.0261699	21.568089751230836	0.6906233797576895	0.5049648839990148	0.8605521265437722	-5.69632	21.568486998136756	21.523636181278953	21.57408270983334	21.568502147552223	21.53571995616889	21.640493365769064	21.571178352015146	21.592564406445845	21.45743117092884	21.59515802256617	21.615242528885684	21.574581175189113
Con_Pmod_vs_Con_Scr	O43681	GET3	-0.0454135	20.874172909175247	-1.97568	0.0753924	0.6079329168396777	-4.26296	20.868816156104476	20.879725337872095	20.841720700706983	20.8086	20.832770497037995	20.81263003213802	20.92229749099273	20.849516950278343	20.89840386769689	20.90975361176072	20.920175715719605	20.945643392735697
Con_Pmod_vs_Con_Scr	O43684	BUB3	0.00447774	18.935385739044044	0.22130574842087902	0.8291509985760668	0.9659199251771812	-5.90908	18.918784070562893	18.92358934426494	18.916497174281652	18.91753027251708	18.9286	18.92619511400678	18.96942819014583	18.913068424420487	18.91348857276377	18.948443529523452	18.970306026836603	18.978719738984314
Con_Pmod_vs_Con_Scr	O43707	ACTN4	-0.0962155	24.313177673276567	-2.35935	0.0391521	0.5358613997467039	-3.69708	24.32773093556853	24.22135217264281	24.205412949873125	24.078726547333492	24.166189205672353	24.22093381189531	24.431025592086097	24.37835358587569	24.377007457644485	24.472339320548475	24.45432041244136	24.424740087737064
Con_Pmod_vs_Con_Scr	O43708	GSTZ1	0.12644882011360892	20.993040923361825	3.655882345455773	0.00416191	0.35955570409741777	-1.70883	20.728332334118477	20.72932812331321	20.768372004901575	20.87753103419558	20.860016611073753	20.86783127740475	21.066547207281452	21.18099627720739	21.17099212884862	21.25899869257904	21.246553022683457	21.161
Con_Pmod_vs_Con_Scr	O43709	BUD23	-0.0116147	17.39152961413496	-0.504824	0.6242357059037241	0.9092250255657002	-5.80559	17.381612335159453	17.35252681138107	17.38287125590413	17.37640160017993	17.37532738664154	17.330437271034903	17.462704394109846	17.42027267721612	17.443259951298828	17.377038976954324	17.371581646813773	17.424321062925607
Con_Pmod_vs_Con_Scr	O43715	TRIAP1	-0.232743	16.41255894549413	-2.53253	0.0289918	0.5084436347853483	-3.43331	16.58781521909378	16.61354086557724	16.47499561989446	16.227592248604342	16.320093131586983	16.430438053729173	16.556942515957243	16.23301466255722	16.1773	16.35529340272032	16.469104644711358	16.50456930773844
Con_Pmod_vs_Con_Scr	O43719	HTATSF1	0.024268061259874685	17.024831679543265	1.1282039986764407	0.28465656743625395	0.7614365538045824	-5.32359	16.974676126916084	16.98514678322888	17.023121568528396	17.040209212531334	17.019696360083632	16.99584308983801	17.035802755134284	17.009414620524822	17.031951257905398	17.051391034743826	17.083957409319403	17.04676993576512
Con_Pmod_vs_Con_Scr	O43734	TRAF3IP2	-0.112267	13.845663552972496	-1.27381	0.23053791637332297	0.7387203027034835	-5.16838	13.914952140133757	13.831292060159718	14.068127290324009	13.95698522607832	13.654707560351667	13.865877737065988	13.688015598976968	13.897300292519564	13.677744952951551	13.897240089813303	13.910661879365708	13.785057807929402
Con_Pmod_vs_Con_Scr	O43739	CYTH3	-0.0906231	19.51521914425999	-2.00832	0.0713621	0.5972308734050852	-4.21617	19.4811	19.55994127651466	19.409359472857847	19.334889684961414	19.452399749730873	19.391290111040767	19.635017716888537	19.599192500389854	19.615177887173132	19.54627329387924	19.514236709766607	19.64370314397494
Con_Pmod_vs_Con_Scr	O43741	PRKAB2	0.021100726782119494	23.9235	0.6145913509353147	0.5520690122642118	0.883261	-5.74484	23.904748416300787	23.977448513197277	24.018195143242224	24.031064975495255	23.98992749536841	23.94270178222298	23.790816138956036	23.87708623620348	23.817095929907772	23.90032489296888	23.910918067459058	23.921626417240248
Con_Pmod_vs_Con_Scr	O43747	AP1G1	-0.0531669	23.184770172165106	-1.74128	0.11116543692584219	0.6613587501684589	-4.58895	23.268793235314146	23.259457121583026	23.19449856868888	23.17279930690024	23.21577263668118	23.174676169960993	23.12169428631497	23.100022544231344	23.175292678885643	23.18284447475251	23.1349	23.216479759116726
Con_Pmod_vs_Con_Scr	O43752	STX6	0.00133717	21.22176941619772	0.032559	0.9746444167953914	0.9913660177268607	-5.93348	21.240112457354133	21.267318725267945	21.223444447782725	21.25785754223341	21.30043993131434	21.176589657280303	21.206834779287213	21.16980142718628	21.256016836929433	21.16802422936123	21.12906500620371	21.26572795417192
Con_Pmod_vs_Con_Scr	O43760	SYNGR2	0.0354445	22.258950801929263	1.1036805474797784	0.29468130280066646	0.7694396117931467	-5.34834	22.624025206356936	22.60734861491479	22.55093590699159	22.63089938257025	22.63892544876883	22.618818286571063	21.910644336871723	21.898028940665657	22.013887925049975	21.889768823826405	21.844333180919133	21.879793569644814
Con_Pmod_vs_Con_Scr	O43765	SGTA	-0.0524422	18.13253196886335	-1.46456	0.17268461644305486	0.7095296467100889	-4.94544	18.203131978317497	18.144590958257403	18.10415057235023	18.095691668713783	18.11050723848645	18.088348014857303	18.160517352269032	18.061600462910953	18.18861945887932	18.144064722694655	18.111786488900105	18.177374709723473
Con_Pmod_vs_Con_Scr	O43768	ENSA	-0.150752	17.595565354218515	-1.50142	0.16306381574882522	0.701815	-4.90005	17.734112252989718	17.547082957489312	17.574486923946537	17.44845790688669	17.43807368552572	17.51689530415683	17.75422181547359	17.315155970574494	17.381110586671124	17.72534490095963	17.803027832918964	17.908814113029585
Con_Pmod_vs_Con_Scr	O43772	SLC25A20	0.10803917253028672	26.95166147158472	3.026663938441266	0.0122585	0.4251611132389963	-2.66997	27.023333187478695	27.02419810768782	26.97082484292639	27.109759289918912	27.12897302454786	27.103741341216978	26.765481020778747	26.79909860706145	26.914305567601527	26.893312145123684	26.8498	26.837109784426907
Con_Pmod_vs_Con_Scr	O43776	NARS1	-0.0381401	24.07040848544514	-2.05913	0.0654899	0.5896186228825004	-4.14276	24.075997601627716	24.058861192848383	24.048862207227845	24.037379658814903	23.99988706054307	24.03203384345048	24.096247079714185	24.09899807568386	24.10762126998853	24.100208212969846	24.08097435259191	24.107831269880936
Con_Pmod_vs_Con_Scr	O43795	MYO1B	-0.0405473	27.150689632452433	-1.84876	0.0931702	0.6406574806734774	-4.44181	27.277337853717896	27.25294335604865	27.269181575934383	27.198432102586462	27.230389929722897	27.24899888801749	27.01484890334374	26.996912912572625	26.979434551817327	27.118253632991344	27.13831650532037	27.083225377356037
Con_Pmod_vs_Con_Scr	O43805	SSNA1	0.0753248	18.804316307870863	1.9961095026601754	0.072846	0.5982665414812145	-4.23372	18.774836097862043	18.78582215706774	18.810522916426216	18.92103877997349	18.861641936913166	18.814474831437863	18.66501861232601	18.772597490479903	18.760157921650876	18.83631305290898	18.774284952087264	18.875086945316824
Con_Pmod_vs_Con_Scr	O43808	SLC25A17	0.0498759	16.01195481787981	1.2806614788176027	0.22821099937451805	0.7387203027034835	-5.16074	16.097490154278066	16.122554674802988	16.01916913020888	16.117678996741056	16.13848546610393	16.132677232345976	15.884408767950122	15.921759321951244	16.0346	15.923241829650484	15.867924456058404	15.883430162195603
Con_Pmod_vs_Con_Scr	O43809	NUDT21	0.0653109	16.321799119045572	1.5413118094835818	0.15317946581209974	0.6970454075102025	-4.85016	16.325938417293138	16.336583317211133	16.332700175114915	16.36399662168251	16.39960673571748	16.427551224521622	16.176609367344373	16.31289831204232	16.292406110815257	16.349731648007204	16.332234965894703	16.21133253290221
Con_Pmod_vs_Con_Scr	O43813	LANCL1	-0.020692	18.253168700909132	-0.422817	0.6810622653229007	0.9257030599208228	-5.84358	18.307965021970297	18.33336540525051	18.27753757664622	18.26179156500513	18.265057883727422	18.329942617021487	18.112112895650135	18.29252060783576	18.277272103680787	18.25679507196951	18.200720184855612	18.12294347729673
Con_Pmod_vs_Con_Scr	O43815	STRN	0.015527239632085355	21.714262597933487	0.6047535168549015	0.5583414797348925	0.8857224276918977	-5.75074	21.62146407566227	21.653593220475777	21.689682201216197	21.710994262080003	21.637390235844563	21.662936718325938	21.797881337558373	21.8201	21.773245216816125	21.72201720809282	21.748395055303497	21.73346083582047
Con_Pmod_vs_Con_Scr	O43818	RRP9	-0.00920135	14.225035237281467	-0.238539	0.8161102445392356	0.9632376890229026	-5.90506	14.319140284180785	14.237511311152378	14.21114593798142	14.25327568117207	14.237702316283702	14.249215489022404	14.196463829847286	14.132249670590284	14.286885286243646	14.216454023536286	14.175466872665714	14.18491214470163
Con_Pmod_vs_Con_Scr	O43819	SCO2	0.013156007818636795	20.90320011932448	0.5856963406290616	0.5706045424925767	0.8892630255981676	-5.76191	20.866181134799053	20.91164838448931	20.9078	20.930611211216796	20.880062336461833	20.91446934086223	20.92004783355553	20.91839464836139	20.87827624575952	20.886864219295912	20.915056365407334	20.90894436588827
Con_Pmod_vs_Con_Scr	O43822	CFAP410	-0.0300164	15.75037389944853	-0.877176	0.40025405369673683	0.8282689998888321	-5.55603	15.665832516038623	15.759871161882993	15.746	15.73472206517832	15.682458453243049	15.664510676360548	15.818231847105436	15.790573459867216	15.86741115898668	15.746158015464108	15.80596589772348	15.722714883139108
Con_Pmod_vs_Con_Scr	O43823	AKAP8	-0.000278925	18.93095006639752	-0.0150712	0.9882613666026892	0.9977763783689433	-5.93391	18.88435520219939	18.923528840474507	18.91560872757214	18.911188929122225	18.915126646978585	18.896340420379804	18.95779611284196	18.98878561046207	18.982334550077717	18.93234969498844	18.93722817979902	18.926757881874412
Con_Pmod_vs_Con_Scr	O43837	IDH3B	0.004513	21.163684128612395	0.16153019406808997	0.8747794046770493	0.9739726624126586	-5.92072	21.249495910566353	21.228880536277305	21.238628208008905	21.20743329901676	21.245255075364724	21.27785529210765	21.087198769588195	21.035000260427104	21.02512282366858	21.123202540611913	21.1651	21.08101570200495
Con_Pmod_vs_Con_Scr	O43847	NRDC	-0.0161811	21.901023510457485	-0.7334	0.47956447490859533	0.8507842670437507	-5.66677	21.924610278918752	21.92083506416249	21.88916887148706	21.9143	21.88142480356805	21.89031339764577	21.90212922109335	21.89108076117907	21.927390078751145	21.88857189313982	21.860770581732147	21.92165437312767
Con_Pmod_vs_Con_Scr	O43852	CALU	-0.0777168	19.870724935482006	-0.755712	0.4666394164143808	0.8479055457704144	-5.65073	20.124473844083003	19.77727048013289	19.723789338018708	19.714056573771515	19.82421879265999	19.85410795864732	19.978786069175023	19.76644314177779	19.96153538691822	19.94325526712512	19.77718329837471	20.003579075099783
Con_Pmod_vs_Con_Scr	O43854	EDIL3	0.0450061	20.469903139316806	0.6803857818414618	0.5111630761390422	0.8619003566198508	-5.70315	20.344480476030384	20.45931882380861	20.460046764156896	20.385237867233688	20.482390506198666	20.531235972975807	20.49560933579831	20.492773453208816	20.365730428681516	20.530954336530407	20.67464744012615	20.416412267052436
Con_Pmod_vs_Con_Scr	O43865	AHCYL1	0.00444816	22.852637457531152	0.15744131913465376	0.8779202193977305	0.9743217855496846	-5.92138	22.811168843722065	22.798154013579744	22.885889377394708	22.853711432093284	22.83274611451584	22.822099178160737	22.933467480536383	22.941187073299552	22.91725806068371	22.811897989515877	22.853472684939018	22.770597241932887
Con_Pmod_vs_Con_Scr	O43896	KIF1C	0.026142334459969163	24.502846111023395	1.3210940365679602	0.21487520205337265	0.7320377032101004	-5.11508	24.565732335154415	24.57452486736753	24.576400248088113	24.591705954715643	24.617313011068276	24.586065488206064	24.368879046649305	24.42321056957261	24.40751605859881	24.45071324943326	24.42969655422753	24.4424
Con_Pmod_vs_Con_Scr	O43909	EXTL3	0.0904405	15.595970566743256	1.3253313480873972	0.21351567869703542	0.7305565329816756	-5.11024	15.50832342308817	15.530798551009624	15.755954970344993	15.790102797731343	15.7148	15.5615	15.450038001232944	15.466410718897563	15.44819831443457	15.609861745035325	15.692181131941556	15.623481629319382
Con_Pmod_vs_Con_Scr	O43920	NDUFS5	-0.0115657	23.179350971810006	-0.287389	0.7794754012587222	0.955035	-5.89203	23.225303925927896	23.245952933811157	23.190464230867384	23.165525671866597	23.222683492318197	23.238814844332357	23.08969389105964	23.10688065680538	23.191612899075498	23.19568849076138	23.206634124192018	23.072956500702567
Con_Pmod_vs_Con_Scr	O43924	PDE6D	-0.115607	20.260802929362434	-3.27351	0.00799532	0.39476914806903657	-2.28934	20.333	20.368438234943778	20.258836309633335	20.14384457602139	20.242404486255396	20.227200352804296	20.297103829999006	20.215672499746887	20.28256402545264	20.247296957780463	20.25701522809131	20.25626238512081
Con_Pmod_vs_Con_Scr	O43929	ORC4	0.0547028	13.666319997079244	1.0441428451936758	0.3201462280436385	0.779059	-5.40664	13.601336322918014	13.662096631700791	13.78590235770503	13.783236154438017	13.705675540392116	13.724531928437465	13.552106278853511	13.631980447976929	13.476417911267053	13.672693443788582	13.752131704784835	13.647731242688586
Con_Pmod_vs_Con_Scr	O43933	PEX1	-0.0214854	18.681890919392853	-0.777877	0.4540214297900317	0.8479055457704144	-5.63437	18.672176868453523	18.71486317046492	18.69836266400287	18.688803968563192	18.660585577732032	18.67155710433681	18.677371479159568	18.75782294127182	18.67463553996459	18.65039713371322	18.623805070556617	18.692309514495065
Con_Pmod_vs_Con_Scr	O43934	MFSD11	0.020652893552757234	19.293329468272198	0.5431589611041021	0.5985	0.8996612922819921	-5.78565	19.327287037021243	19.33444443191952	19.326753446571352	19.440756928341536	19.27690023706358	19.332786430765267	19.185554840890266	19.158723498892453	19.21027370165202	19.292825827911503	19.276945855298635	19.35670138293901
Con_Pmod_vs_Con_Scr	O60216	RAD21	0.00501754	14.178451872212616	0.13296684697089797	0.8967642721108209	0.9771853590929308	-5.925	14.084188935148992	14.08588490933874	14.150970153922742	14.13324432601184	14.056070789770486	14.14678150338051	14.3398	14.361753113702354	14.238058340180316	14.170192375484095	14.217853568414093	14.15663102731122
Con_Pmod_vs_Con_Scr	O60220	TIMM8A	-0.221884	20.95848795063943	-3.32235	0.00735057	0.38428370653104105	-2.21447	21.19482159271323	21.200961034130067	21.11738432067995	20.897096189163392	20.95170216043588	20.998718025979045	20.89234685817902	20.61879184386162	20.63008068651473	20.92950631076774	21.014921704772178	21.055524680476307
Con_Pmod_vs_Con_Scr	O60229	KALRN	-0.0811135	18.98298132797298	-2.68523	0.022221134713387523	0.492772	-3.19836	18.96131582651732	19.03569013048828	19.039797715168618	18.931248987337543	18.94766429305979	18.914549879094903	18.962912716211864	18.93487781346432	18.873958820079768	19.02878080119161	19.08270637002063	19.08227258304112
Con_Pmod_vs_Con_Scr	O60231	DHX16	0.024355725631760805	17.477662342518784	1.2593432363170782	0.23551098518458155	0.7392861389237858	-5.18441	17.454376883037437	17.430691573688573	17.4623	17.492032225809496	17.47055507167587	17.457877795313028	17.49645543344608	17.505288422347004	17.49030810065408	17.486813723966538	17.471865715068223	17.51335370604197
Con_Pmod_vs_Con_Scr	O60232	ZNRD2	-0.00296251	15.125757854971798	-0.0547824	0.9573528085510964	0.9881015666745631	-5.93249	15.193036686571263	15.162811237306038	15.143405041053466	15.2219	15.123396743471496	15.14509912911392	14.967065167440037	15.149696769876506	15.151472764745009	15.127228867952391	14.991600327394329	15.13241196290822
Con_Pmod_vs_Con_Scr	O60238	BNIP3L	-0.000484825	20.951668835397378	-0.0151836	0.9881738516192762	0.9977763783689433	-5.9339	21.018668533534555	21.034235702136424	21.006582590021907	21.01983292289015	21.048740152868973	20.98945927418595	20.88167603630443	20.895873926033612	20.868253472702353	20.86840145232724	20.826285513110065	20.96201644865289
Con_Pmod_vs_Con_Scr	O60244	MED14	-0.00408232	13.128544992912914	-0.125107	0.9028307176011924	0.978418	-5.92604	13.12183251507009	13.157664669418978	13.19005185510465	13.15105265256012	13.186906336994085	13.119343104142242	13.074952877829856	13.194097802999812	13.10657342536769	13.085017310488714	13.060068727191204	13.09497863778753
Con_Pmod_vs_Con_Scr	O60245	PCDH7	0.0672101	14.459506642885916	1.5349038407460336	0.1547312846088857	0.6977758210767049	-4.85822	14.386701729402326	14.35723175653312	14.274743478906164	14.3652	14.470988925226187	14.384121557570918	14.490535242672753	14.48278041681562	14.585192135257936	14.589340166638737	14.508402985395149	14.61884462642189
Con_Pmod_vs_Con_Scr	O60256	PRPSAP2	-0.0557099	18.985752848341633	-2.27903	0.044973093622303416	0.5377805990970352	-3.81802	19.13805434836135	19.095847813353014	19.06624564403761	19.022318692808646	19.052686844033765	19.058012619924224	18.840974218087513	18.822290087392897	18.82956588392945	18.971091853453007	18.93380057414761	18.998145600570528
Con_Pmod_vs_Con_Scr	O60264	SMARCA5	-0.00155403	16.788713835267657	-0.0600385	0.9532661795853192	0.9877182362068813	-5.93218	16.773041548839338	16.776593040280545	16.79690593979051	16.769576292196724	16.763400486491996	16.808901656704577	16.836941617086186	16.807809152691096	16.760393052375875	16.781111906609784	16.827156868760405	16.762734461384845
Con_Pmod_vs_Con_Scr	O60266	ADCY3	-0.00752425	16.286842811089254	-0.255	0.8037087830023844	0.9600755119534531	-5.90093	16.19181228350313	16.170627241081547	16.2437	16.217917789308796	16.182969429556014	16.182633894750563	16.47657855505042	16.47700220808277	16.390395888650968	16.28184525105787	16.2963	16.33033065419307
Con_Pmod_vs_Con_Scr	O60268	KIAA0513	-0.0596193	14.552654956723028	-0.772087	0.45729615123757594	0.8479055457704144	-5.63868	14.49749651984357	14.46503149035196	14.344941403517543	14.35326767899002	14.412689639663489	14.362654193105907	14.590364108408435	14.576126958664506	14.894759692240818	14.78151274281156	14.707906849659476	14.645108203419056
Con_Pmod_vs_Con_Scr	O60271	SPAG9	0.00655987	22.87633625341376	0.22512947407269504	0.8262527257116051	0.96588	-5.90821	22.85383336916794	22.827099678484444	22.824357584286133	22.87385133152175	22.84679653310136	22.804322368979868	22.909811522781716	22.87996682644978	22.95931538363974	22.908726823184224	22.87332140733081	22.954632212037374
Con_Pmod_vs_Con_Scr	O60279	SUSD5	0.033450754718352016	13.577494134483818	0.5471778173279068	0.595834	0.8988823956542498	-5.78348	13.7307	13.526929015915544	13.538975681788022	13.52970165398856	13.697679274464628	13.669527965996824	13.36822914449242	13.428460543296197	13.40144950374502	13.735570470764834	13.598495381064186	13.704259045698176
Con_Pmod_vs_Con_Scr	O60281	ZNF292	0.00428572	18.310046610668156	0.19977137439406464	0.8455221749564267	0.9697794263494425	-5.91369	18.34455825852684	18.30248159420348	18.34299546779617	18.311	18.34424588656944	18.34764922784936	18.29408080123128	18.311391824896095	18.273258579097178	18.29389749279792	18.294947776142156	18.260055047071948
Con_Pmod_vs_Con_Scr	O60285	NUAK1	0.0365719	18.326222381953745	0.6795987765870011	0.5116414422644435	0.8620309607820363	-5.70368	18.11648647580239	18.21555931164333	18.269150527309336	18.197132707499215	18.264732168950697	18.249047181548352	18.372344202655302	18.484339459206396	18.285996349749023	18.477823087977946	18.55005991032165	18.431997200781296
Con_Pmod_vs_Con_Scr	O60287	URB1	0.00347087	16.619216260825276	0.14746320709828648	0.8855939476137887	0.9760192068290906	-5.92293	16.579069276719792	16.604641093367157	16.58898526120147	16.60375899176915	16.616877155808197	16.56247210131917	16.63755523781475	16.611711082546574	16.63049088417774	16.646385990398954	16.64182691795182	16.706821136828534
Con_Pmod_vs_Con_Scr	O60291	MGRN1	-0.000895306	21.748465768908165	-0.0278158	0.9783370956164172	0.9924349764349731	-5.93363	21.744629683985185	21.812904195837053	21.750003221014698	21.723659170337537	21.83378121453375	21.74741079861724	21.726143977866062	21.680999140038367	21.687734304317953	21.733581959619652	21.751075904261462	21.78966565646902
Con_Pmod_vs_Con_Scr	O60292	SIPA1L3	-0.0249121	19.788248813412743	-1.1184	0.288633	0.7633470774518285	-5.33354	19.719669242435423	19.76583701610908	19.74904513240145	19.70009221411784	19.724272352834436	19.735450605248033	19.89655989536613	19.90854987748411	19.851566033719724	19.793822884123617	19.82060506717093	19.793515439942123
Con_Pmod_vs_Con_Scr	O60293	ZFC3H1	0.028645071310943848	22.278779460980623	0.544851	0.597377	0.8996612922819921	-5.78474	22.128111542492977	22.08496001340348	22.223945828190917	22.20985780390686	22.110166598246817	22.202928195866537	22.401121359649693	22.54386532052031	22.344876098734172	22.37951888105773	22.38665979679731	22.32934209290065
Con_Pmod_vs_Con_Scr	O60296	TRAK2	-0.0241847	19.21449656310467	-0.575365	0.5773136969916579	0.8906654304829315	-5.76783	19.287523861356828	19.188350373838688	19.186465995434045	19.114003889825007	19.28179754890353	19.19398457747882	19.180781256515253	19.18749241032059	19.200315799751873	19.27586519977592	19.207771831352847	19.26960601270266
Con_Pmod_vs_Con_Scr	O60303	KATNIP	-0.0555436	12.114678962220092	-1.36629	0.20073821915317697	0.721058	-5.06289	12.141574701738245	12.0291	12.03709049737656	11.937823149339865	12.043268193749832	12.0601	12.179489523598605	12.091680101104023	12.11578113209188	12.261265863464583	12.261135825928866	12.217865053113137
Con_Pmod_vs_Con_Scr	O60306	AQR	-0.0110723	15.702752633625522	-0.447641	0.6636178214079405	0.9226302981743336	-5.83276	15.667914940454173	15.70309850168906	15.716645217059623	15.682395954828577	15.67372542025451	15.698320260791393	15.72966878523028	15.709399770552992	15.663762365511278	15.714271473628587	15.765514351484626	15.708314562021174
Con_Pmod_vs_Con_Scr	O60313	OPA1	-0.0121935	24.636594338085196	-0.724667	0.4846843686061151	0.8534536834033964	-5.67293	24.71441423202921	24.701867760327765	24.711800584208497	24.70214602880176	24.693585652257447	24.69577025726383	24.54198398246093	24.53935318223348	24.56273012671785	24.598205727640373	24.598734914807057	24.578539608274134
Con_Pmod_vs_Con_Scr	O60315	ZEB2	0.020819	12.659709602274148	0.31282709064708913	0.7606121935317324	0.9484738272581473	-5.88431	12.824867200366304	12.622108973851004	12.709135293846098	12.721661075692031	12.820797369618507	12.676109973457717	12.552472176022745	12.46504865466293	12.708582497439558	12.650929799092175	12.584238007279689	12.580564205961029
Con_Pmod_vs_Con_Scr	O60318	MCM3AP	0.0464267	18.481737995836877	1.738798274187666	0.11161665146965706	0.6613587501684589	-4.5923	18.434061906892538	18.453704488137692	18.49158468356843	18.517542323177548	18.51167767200393	18.48941108284148	18.427376334804883	18.50350523551558	18.489638853598752	18.50389287844759	18.50717719522592	18.45128329582817
Con_Pmod_vs_Con_Scr	O60331	PIP5K1C	-0.0103526	19.28348919278025	-0.306774	0.7650861597632129	0.9514871399333666	-5.88621	19.23593092520393	19.250337724665332	19.31422002849916	19.265519804416808	19.242844434657147	19.261066496139797	19.316514685722073	19.37456020436984	19.233878926971677	19.28900276303362	19.311	19.306990511154044
Con_Pmod_vs_Con_Scr	O60333	KIF1B	0.0106591	21.121021478948155	0.471651	0.6469421400262305	0.9172073045805539	-5.82173	21.13265781472397	21.17246266977967	21.120859687696047	21.138138455015927	21.170137524281113	21.14968139675018	21.040073155029972	21.090437020432542	21.09509451557019	21.124049750051896	21.09777204862593	21.120893709420415
Con_Pmod_vs_Con_Scr	O60336	MAPKBP1	-0.0607148	16.034238565943646	-1.14373	0.27844989475946125	0.7588105839637214	-5.30772	16.07967690942068	16.233939541709137	16.01614679117554	15.974745566098058	16.1161	16.056739780485884	16.00198138049114	15.971569349685035	16.065567786014967	15.958363872128531	15.955304809657031	15.980693617166365
Con_Pmod_vs_Con_Scr	O60341	KDM1A	0.00318965	17.34748659353214	0.1756478417936667	0.8639529031600527	0.9712625701552512	-5.9183	17.308346599677055	17.302060136603316	17.322658588608093	17.31576014211433	17.304296827093975	17.32257732065083	17.3744	17.402546626559307	17.357687844271762	17.388562332099934	17.388444992240235	17.38247208767242
Con_Pmod_vs_Con_Scr	O60343	TBC1D4	0.016415	22.04003938265246	0.49144760819494415	0.6333443123986608	0.9118570439879463	-5.81223	22.054068861911297	21.994005407170583	22.066979136419093	22.10470669886526	21.978827659433215	22.080763913159796	22.099245057817956	22.10445000086095	22.054420433730694	21.982312782981595	21.989985243284952	21.970707396194104
Con_Pmod_vs_Con_Scr	O60353	FZD6	0.012400680914968376	18.725278547578114	0.4098721731932364	0.6902379990222243	0.9273605769176143	-5.84899	18.72367747830788	18.6877	18.717904443562087	18.71127113879782	18.68485174153685	18.7704	18.77787958809511	18.7481	18.70994301147682	18.727363256246385	18.76475587857595	18.679474182789253
Con_Pmod_vs_Con_Scr	O60361	NME2P1	-0.0694031	19.316458618496792	-1.29692	0.2227699115870246	0.7354576507643895	-5.1425	19.546752691329186	19.444491004498797	19.35187352511074	19.31103631275012	19.353059412803304	19.47081223390159	19.23211380266468	19.15661000461317	19.14359459207394	19.27155289002565	19.216290418515435	19.299316533674908
Con_Pmod_vs_Con_Scr	O60427	FADS1	0.0718352	14.976111098712936	1.0870765314928952	0.3016217350709881	0.7728769975140972	-5.36485	14.838252601627858	14.82419265530228	15.03219569001361	15.034296319713512	14.912475021039842	14.963375201842435	15.020698368522613	15.094523981804237	14.874540213789356	15.016272660068053	15.095130600807195	15.007379870024234
Con_Pmod_vs_Con_Scr	O60437	PPL	0.2211880630290466	12.213951608025925	1.4947902529513424	0.16476019676274534	0.701815	-4.90827	12.28613167655752	12.41066374853412	12.440217819955208	12.40926616181916	13.041593658079158	12.349717614235669	11.83409006968279	11.848632346458672	12.047134710400387	11.9698	11.989491569496645	11.940641605314362
Con_Pmod_vs_Con_Scr	O60443	GSDME	-0.0421584	20.815379283900565	-1.24859	0.23926530742241361	0.7398028321863026	-5.19625	20.650507124163006	20.663947579433746	20.579528744970272	20.57760806202784	20.614656252950475	20.575243958918485	21.046901158166385	21.00390499661752	21.06195316993674	20.991917388996807	20.950263102232107	21.068119868393392
Con_Pmod_vs_Con_Scr	O60447	EVI5	-0.0313444	21.837324408714277	-1.27054	0.2316536052012947	0.7387203027034835	-5.17202	21.91409406207584	21.923252595679468	21.923230510227057	21.898255528013703	21.917888551722697	21.85039984941691	21.793139609361447	21.817909289476138	21.826819363649815	21.723399308113887	21.693134330357136	21.766369906477216
Con_Pmod_vs_Con_Scr	O60462	NRP2	0.0695777	19.170075065456743	0.684913	0.5084163359473723	0.8605521265437722	-5.70014	18.990470386070264	19.126751114198857	19.260663081655032	19.18137140923948	19.134278709007212	19.270967548648947	19.123707173220662	19.256004974337767	18.978764134139524	19.238740871664987	19.42965910237402	19.049522280924183
Con_Pmod_vs_Con_Scr	O60476	MAN1A2	0.016252567332873724	20.31566456889149	0.6925651253972434	0.5037944395781697	0.8605521265437722	-5.69501	20.34987995693996	20.421942070509505	20.400810572279735	20.412203384531537	20.42044026826239	20.38874664893391	20.177107833575043	20.23276315400936	20.20451442401285	20.25557615743656	20.258746394577784	20.26524396162922
Con_Pmod_vs_Con_Scr	O60488	ACSL4	0.00949599	22.003845579731735	0.5038271039020308	0.6249124981564501	0.9092250255657002	-5.80609	22.02884676414607	22.000225940848782	22.031788994794432	22.0208	22.03697578906787	22.031586954407818	21.93299935643263	21.95406441333508	21.909066878038477	22.035479795067868	22.02596437906838	22.0384
Con_Pmod_vs_Con_Scr	O60493	SNX3	0.00111051	24.500623458036827	0.050450365381811926	0.9607219761459875	0.9886346544163713	-5.93272	24.44496713254861	24.482998174493822	24.49406455603298	24.50605408093941	24.477042379292172	24.442264941818586	24.51493905175231	24.513384865844102	24.530239320898954	24.521011890364637	24.534503495886057	24.546011606570303
Con_Pmod_vs_Con_Scr	O60499	STX10	0.017468907886147633	18.29034984648117	0.3636001450380078	0.7234593323151379	0.9367685035076727	-5.86698	18.1766	18.22309334746875	18.30707913885854	18.360769054208816	18.20057680107312	18.197878507244894	18.41400107431859	18.505987636065615	18.44234095579376	18.20224338475542	18.20187224451917	18.25171086092628
Con_Pmod_vs_Con_Scr	O60502	OGA	-0.0134447	23.233866520893578	-0.550309	0.5937614043243972	0.898796	-5.78178	23.24348909841995	23.235547233911095	23.204850906234025	23.220995423189237	23.22395672895622	23.198600854913817	23.2216	23.202179809514597	23.23363581004038	23.26693782107575	23.233644267846337	23.32092107109435
Con_Pmod_vs_Con_Scr	O60503	ADCY9	-0.0298544	20.114686462203665	-0.707474	0.4948628193269008	0.8599001604693735	-5.68487	20.090890758317673	20.14319614515168	20.0304	20.06566332413668	20.015429283372058	20.09380918773208	20.041045049569203	20.174129355263624	20.171455458690794	20.218495357039956	20.14276237846154	20.188983194211584
Con_Pmod_vs_Con_Scr	O60504	SORBS3	0.031079356864896823	19.800276261461672	1.1704635926715257	0.26800704254129615	0.7470827452808014	-5.27998	19.74446378951071	19.701668902321963	19.78180588390016	19.806	19.748136662716313	19.767063945253007	19.843414276549083	19.874325564776964	19.80827553691261	19.83976598755642	19.836104408175764	19.85231414150887
Con_Pmod_vs_Con_Scr	O60506	SYNCRIP	-0.0222823	21.509319501249184	-0.90027	0.38840305358470617	0.8237661537859474	-5.53666	21.5228	21.48361483343229	21.51373268575636	21.526248331442112	21.44521135407464	21.481813423756034	21.543797165727337	21.53755981178448	21.527747507928613	21.503903322028684	21.485072319500876	21.540360711972692
Con_Pmod_vs_Con_Scr	O60507	TPST1	0.0633394	18.19596028189199	0.9454386993325635	0.36594081662706945	0.8128207454603136	-5.49755	18.152812370596216	18.198803103863483	18.199759526186657	18.334971258139195	18.218	18.18845790478594	18.11772398649591	18.376129023083703	18.30800848072692	18.113511830110696	17.983233611188503	18.16014818901975
Con_Pmod_vs_Con_Scr	O60508	CDC40	0.031221533558088765	15.91344265137409	0.8356116705700253	0.4222068324863658	0.8348664894343217	-5.58981	15.818535349580388	15.81132905182674	15.917833349469706	15.947218626926066	15.834367817871538	15.859775906753498	15.957408465509555	15.993731182513388	15.90953010729212	15.954897113285323	15.980024535134191	15.976660310326562
Con_Pmod_vs_Con_Scr	O60513	B4GALT4	0.013587035481441134	15.412264602611176	0.1422843968870356	0.8895816685423374	0.9762238097014131	-5.9237	15.355951886354292	15.480206538359877	15.29868918993023	15.454844863812864	15.461914749778618	15.258849107497236	15.378959039081842	15.346832611628033	15.714296214792684	15.4057	15.319693544102549	15.471189392872777
Con_Pmod_vs_Con_Scr	O60518	RANBP6	0.0798122	19.00689828916854	1.7929823955405484	0.10214701021818938	0.6543354960732581	-4.5187	18.87695864521785	18.92553749884441	19.00364647442598	19.057164910117567	18.98480371214158	19.003610690306814	19.02947000274899	19.121479722440025	18.947236664601014	19.021421460635526	19.046496694505773	19.06495299403692
Con_Pmod_vs_Con_Scr	O60524	NEMF	-0.0329087	21.54652864743601	-1.2072	0.25416563090439326	0.7439648048457665	-5.2411	21.5539	21.52502421721515	21.518935195337857	21.53692977714518	21.476862312478524	21.485340170207085	21.604081884287083	21.613734954560854	21.638978765836455	21.535561331017316	21.48751736412388	21.581478713777727
Con_Pmod_vs_Con_Scr	O60547	GMDS	-0.019029	21.925476774677268	-0.513324	0.6184819442909391	0.9081798066725685	-5.80129	21.98350485533625	22.012983423001312	22.060496907622944	22.01649273646942	21.95635339444992	22.02705218467092	21.8738	21.89781068579392	21.76253754687243	21.818546322759644	21.867623890700543	21.828487700327894
Con_Pmod_vs_Con_Scr	O60551	NMT2	-0.0115535	20.434251210068908	-0.343597	0.7380133244512699	0.9413840575616306	-5.87411	20.60042363788053	20.572392280153903	20.648175731472605	20.633606323904942	20.54000852556418	20.6127	20.24991033341861	20.328534882532153	20.267581353027253	20.271510759174255	20.276231810844585	20.20992262944308
Con_Pmod_vs_Con_Scr	O60563	CCNT1	0.036669368956335546	18.22555451728976	1.6250741334217833	0.1341153632319703	0.6796580417528929	-4.7429	18.211839814897445	18.195176523379995	18.24965530631463	18.264548444543113	18.23997738642687	18.262153920491084	18.198222633492815	18.23120540532978	18.183311338382424	18.22931442005034	18.243637479318036	18.19761153485056
Con_Pmod_vs_Con_Scr	O60565	GREM1	-0.0986948	16.12623192433562	-0.781859	0.45177811933199663	0.8476507422042263	-5.63138	16.302529156132717	15.8484	16.03039378217781	16.100559993712473	15.812900647943453	15.9717	16.43404295602585	16.265831191091188	16.299928761811856	16.139695350535582	15.95164207772222	16.357170401257985
Con_Pmod_vs_Con_Scr	O60566	BUB1B	-0.219749	-3.24203	-1.07702	0.30588733420346953	0.7730168875288558	-5.37476	-3.26043	-3.04398	-3.57117	-3.42334	-3.43439	-3.67709	-2.85739	-3.22016	-2.76494	-3.35428	-3.54758	-2.74962
Con_Pmod_vs_Con_Scr	O60568	PLOD3	-0.00375465	21.650458303215487	-0.186151	0.8559171003478956	0.9700238487574436	-5.91636	21.63314056608797	21.670242795223363	21.647189160901064	21.635496177298545	21.678484689600744	21.625327711233915	21.625226936123543	21.62683854762701	21.645225402763344	21.667884132289608	21.66941312543486	21.681030394001883
Con_Pmod_vs_Con_Scr	O60573	EIF4E2	-0.0193456	20.223220715005688	-0.771127	0.45784048573343616	0.8479055457704144	-5.63939	20.16852349371351	20.219425181870296	20.192478168173757	20.20847136377281	20.17211967765125	20.141799114907332	20.273292810187353	20.28495526831636	20.313564537069293	20.223488024974777	20.212566013269093	20.26796492616242
Con_Pmod_vs_Con_Scr	O60583	CCNT2	0.0483791	15.781721437031406	1.459985681580609	0.17391262155699594	0.7095296467100889	-4.95102	15.685533564720078	15.695066649651222	15.762104996066054	15.78835631845341	15.77237824172713	15.727107807170803	15.81908868663602	15.920335636774032	15.822610232459049	15.793353834754344	15.772055324837629	15.822665951127094
Con_Pmod_vs_Con_Scr	O60610	DIAPH1	0.00785274	22.04475956860664	0.41525198142641606	0.6864180399423796	0.9269120979652602	-5.84676	22.026277132550845	22.034316358617193	22.065259135625467	22.072634010509557	22.043910696064593	22.03286612740569	22.042305214321647	22.047522502012253	22.034191569171988	22.037941702785098	22.048819862234588	22.051070511980747
Con_Pmod_vs_Con_Scr	O60613	SELENOF	0.024864364923406157	20.370888273062548	1.090271699389352	0.3002765193290714	0.7721396211318979	-5.36169	20.299880036121777	20.275997861716338	20.30493397479384	20.29469363763978	20.338758330195144	20.321952999567245	20.471719447117685	20.439997378025097	20.458525292854247	20.419710670865225	20.44684771502728	20.37764193282691
Con_Pmod_vs_Con_Scr	O60636	TSPAN2	0.0692412	19.904000420270165	1.5231047041152295	0.15762457521909923	0.6987405136268369	-4.87303	20.046498688584116	20.136591557788343	20.05846251133433	20.19803275235516	20.15887687483437	20.092366601463823	19.530490178986568	19.57293057212348	19.70570981666474	19.790688768684362	19.75456173637798	19.802794984044695
Con_Pmod_vs_Con_Scr	O60645	EXOC3	-0.0624131	22.8348	-2.96666	0.013606846827566984	0.4437829401100975	-2.76285	22.83025803465796	22.900604222006745	22.84553941555552	22.793797988482034	22.79312989054088	22.802234567077235	22.89562167380816	22.888253319315403	22.901136779646485	22.781157043372072	22.803952905835065	22.782450815148856
Con_Pmod_vs_Con_Scr	O60664	PLIN3	-0.0273854	24.331302029825547	-1.07236	0.3078782423653374	0.7730168875288558	-5.37932	24.398404285289686	24.342097107745392	24.338646429861477	24.341735834687405	24.31978522124596	24.335470612799845	24.308427719441696	24.328242052238146	24.33119785192699	24.32076047696593	24.26364954399362	24.34720722171043
Con_Pmod_vs_Con_Scr	O60669	SLC16A7	-0.104003	18.383531702156827	-2.0555	0.065894	0.5896448140711641	-4.14803	18.65962450584716	18.60932580978192	18.51026765734347	18.470060661309997	18.525334053382128	18.471815305124064	18.195054023967828	18.139681920935413	18.256213428027305	18.25840485619094	18.164403031787096	18.342195172184596
Con_Pmod_vs_Con_Scr	O60678	PRMT3	-0.0775299	12.196569024172668	-1.39437	0.19235519999922118	0.721058	-5.02988	12.44915156615339	12.45036958450875	12.2726	12.28778140974768	12.325392244501211	12.326315835911329	12.01824495036512	11.932646913135958	12.099864630643848	12.070980887602085	11.997643532162662	12.12787866151887
Con_Pmod_vs_Con_Scr	O60684	KPNA6	0.00712114	20.650128256530763	0.26988802801516365	0.7925407210430079	0.9566753019125397	-5.89697	20.67547811362303	20.686825675701815	20.716743697829735	20.753832154146643	20.668927554591164	20.677651195510965	20.568540044210945	20.589101843793703	20.62563354578019	20.616416525214568	20.620781587611376	20.601607140355007
Con_Pmod_vs_Con_Scr	O60701	UGDH	-0.0408425	21.911124660229063	-1.01746	0.3320813547240725	0.7880879403737766	-5.43193	22.03837915069223	21.984163839046772	21.975971453662815	22.025338264320972	21.915590584593417	21.935057956901613	21.84581838207507	21.835680098587268	21.953050585644913	21.82159299192557	21.75962888715609	21.84322372814203
Con_Pmod_vs_Con_Scr	O60704	TPST2	0.020754753711766938	23.30595362061199	0.36070714803499215	0.7255573290405992	0.9372527604391676	-5.86804	23.18652146492327	23.36623326862433	23.294362286794374	23.375566534147463	23.25298476197857	23.280829985351225	23.37700013783777	23.584697416889476	23.518463174342884	23.15325140860835	23.12372534129281	23.15780766655338
Con_Pmod_vs_Con_Scr	O60716	CTNND1	-0.00341965	21.383111460456835	-0.134816	0.8953378033503103	0.9771853590929308	-5.92475	21.449104068793744	21.450772248760927	21.413175593512328	21.42723563476731	21.464396361696256	21.411160961545427	21.257549733305247	21.214034120316473	21.28283460400164	21.402991709861357	21.385074175182073	21.439008313739237
Con_Pmod_vs_Con_Scr	O60725	ICMT	-0.052036	16.947317972441844	-1.04452	0.31997797707527287	0.779059	-5.40627	16.976870290833013	16.92070038081971	16.812222298791248	16.76256858669705	16.868515834803755	16.922600577786657	17.064654453673658	16.96147420992889	16.975782584920555	17.033374481219354	17.007974625180772	17.06107734464748
Con_Pmod_vs_Con_Scr	O60749	SNX2	-0.029199	23.978258112456885	-1.56659	0.14718939808984377	0.694261	-4.81813	23.982864593251023	23.98716559192412	23.97811318884785	23.960098311719168	23.9602	23.940289143482705	23.934913864861745	23.947784485661145	23.984434736574578	24.028534727271506	24.014822341978896	24.019917524863093
Con_Pmod_vs_Con_Scr	O60762	DPM1	-0.00233472	21.955359652630833	-0.0923688	0.9281650310196694	0.9848861446144189	-5.92967	21.97221038226364	21.972404286194216	21.930944228942614	21.92568402846458	21.97836133463273	21.9645	21.938880126932197	21.951547816242712	22.00521630133625	21.96290206382121	21.945929992245155	21.91572589759349
Con_Pmod_vs_Con_Scr	O60763	USO1	-0.0507451	26.15427113200303	-2.19133	0.0522825	0.5588077629982624	-3.94876	26.22650958684433	26.177452797110575	26.190431968807992	26.146509742401477	26.131581952347936	26.164067476685727	26.17338362597572	26.169735334899887	26.212962566054276	26.10742326182622	26.09809392643103	26.053101344651175
Con_Pmod_vs_Con_Scr	O60783	MRPS14	0.1516683637559595	21.033741454001476	3.226063425698712	0.00867738	0.40001201681270493	-2.36225	21.0268	21.06748073212241	21.149235930447173	21.200390990358933	21.2482	21.249906815705316	20.902355937509206	20.978229974349507	20.824357678830793	20.91900406830721	20.988369583663623	20.85049017476352
Con_Pmod_vs_Con_Scr	O60784	TOM1	0.0930279	22.30109519726726	2.21135	0.0505197	0.5529377476554445	-3.91905	22.240154228377328	22.285191623717488	22.327214046814817	22.475	22.34981466409529	22.306860269299143	22.198932352075055	22.199457744774893	22.229183343402145	22.305509706811694	22.309196770480913	22.386658889852946
Con_Pmod_vs_Con_Scr	O60825	PFKFB2	-0.135394	15.198253759611834	-1.5046	0.16225723924637112	0.701815	-4.8961	15.12811806837509	15.438072503495505	15.352522502836871	15.336165472695034	15.085970252071684	15.090396516388775	15.133346770786073	15.071355206100554	15.25445795450059	15.108688345446808	15.25431881128239	15.125632711362629
Con_Pmod_vs_Con_Scr	O60826	CCDC22	5.104521664591744e-4	22.009239049817356	0.0291834	0.9772722786373147	0.9920625215750011	-5.93359	21.988805707453636	22.004900845962567	22.013065405716493	22.01106214722874	22.00153581652405	21.99570535187929	22.00201432519443	22.028933023191374	21.998970021742966	22.01859150472941	22.01696558619479	22.03031886199054
Con_Pmod_vs_Con_Scr	O60828	PQBP1	0.0302815	14.430834137899422	1.0772595950256945	0.3057836613076379	0.7730168875288558	-5.37452	14.381673119634108	14.360555161133211	14.425929281930426	14.460146429213069	14.399418117038056	14.399437526309931	14.534618038045087	14.475530293664072	14.464269428823089	14.397054066479338	14.429645935135497	14.441732257387194
Con_Pmod_vs_Con_Scr	O60830	TIMM17B	-0.0151881	16.420013681438444	-0.326873	0.7502657703609054	0.9446365168739791	-5.87977	16.467983066260874	16.35993645901257	16.390490167727435	16.37036812016768	16.32532613006973	16.477151234038438	16.588561556460295	16.52673082685867	16.438275349393727	16.363548110096918	16.37371372776543	16.358079429409575
Con_Pmod_vs_Con_Scr	O60831	PRAF2	0.1238852021057184	20.35046612132082	1.4057801024662187	0.1890337571371659	0.7190219653128996	-5.01633	20.4732	20.368274800335826	20.27562128046801	20.379725583882532	20.53319288757995	20.575835255424504	20.299996996886843	20.487373799654545	20.59120798820077	20.20292012802711	20.071193866173974	19.947048829449763
Con_Pmod_vs_Con_Scr	O60832	DKC1	1.764007169278159e-4	20.673432077883508	0.010721364359041924	0.9916491979577672	0.9983308417405822	-5.93396	20.65934996280649	20.66988314212577	20.67362318500488	20.670157601961225	20.663592723609295	20.66963516651739	20.698874380089176	20.70079923023111	20.70234715487712	20.658602239600473	20.671003072817673	20.64331707496149
Con_Pmod_vs_Con_Scr	O60841	EIF5B	-0.0386783	23.930759094116357	-1.35452	0.20434428307426955	0.7238213410594051	-5.0766	24.010547240649537	23.92924095329327	23.9274	23.91935073300488	23.903488263881627	23.92831349613708	23.930713856970232	23.8554	23.91819405047039	23.95068867172841	23.926453431260235	23.969271771160344
Con_Pmod_vs_Con_Scr	O60869	EDF1	-0.0408215	17.37613176934711	-0.786605	0.4491139076572809	0.8467399984018738	-5.62781	17.453745636229847	17.321018379181115	17.301564673954353	17.358805262858144	17.268274166547656	17.3268	17.49331369561686	17.407921478879633	17.490625858019826	17.362526594137826	17.276285208375242	17.452715419448957
Con_Pmod_vs_Con_Scr	O60870	KIN	-0.0181637	14.163742916834702	-0.603038	0.5594392699326616	0.8858892756510479	-5.75176	14.175680828815947	14.170765793618918	14.246475054730691	14.229003067460228	14.14119255013942	14.16823487999486	14.1374	14.19723969004808	14.129137138959868	14.1216	14.127798266252702	14.120443921459009
Con_Pmod_vs_Con_Scr	O60879	DIAPH2	0.0460231	21.708291690459333	1.0784987828997763	0.3052558999158834	0.7730168875288558	-5.3733	21.532717063546848	21.606185330835537	21.649347936663936	21.65126515380883	21.606389619441497	21.66866474406762	21.82127948889433	21.897770391853783	21.76270257002317	21.76230917223009	21.82702878716746	21.7138
Con_Pmod_vs_Con_Scr	O60884	DNAJA2	-0.034378	22.372674760474148	-2.05516	0.0659321	0.5896448140711641	-4.14853	22.42468710390019	22.41862491942768	22.407933247847257	22.376352542968128	22.38270289325716	22.38905589051724	22.36797623857248	22.339861713178696	22.35946216158663	22.33374418026473	22.339404507503502	22.332291726666075
Con_Pmod_vs_Con_Scr	O60885	BRD4	0.031752	19.92503311857817	0.7226275097349802	0.4858848807336713	0.8544236236283507	-5.67436	19.94223638568039	19.93254179962068	20.058772269782672	20.07973365778286	19.971720689925355	19.977352251028073	19.844881813638175	19.87110415744845	19.755496363280283	19.85962220132914	19.88832531090383	19.918610522518144
Con_Pmod_vs_Con_Scr	O60888	CUTA	-0.0065187	23.32073536153205	-0.298598	0.7711438790546026	0.9535361704483869	-5.88871	23.23201775601905	23.265249751764593	23.263319327576987	23.27525189230464	23.208225311923883	23.257553543034057	23.45673412253686	23.477312411765716	23.44655664289742	23.316691367939907	23.331446143660692	23.318466066960827
Con_Pmod_vs_Con_Scr	O60890	OPHN1	0.0088222	24.97504925543329	0.24061247472119027	0.8145453234556668	0.9630026570760167	-5.90455	25.083247431144237	25.086532511945496	25.068	25.08328749449022	25.14351627783091	25.037461960482464	24.792414544440348	24.79096790047931	24.794853586559036	24.922633971948624	24.874967441639622	25.022688743731628
Con_Pmod_vs_Con_Scr	O60907:Q9BQ87	TBL1X:TBL1Y	-0.0468035	5.636685076144444	-1.45622	0.17492876342475322	0.7095296467100889	-4.95561	5.327491680088862	5.295494461817693	5.327202365861536	5.247651867857801	5.319395300782995	5.242730752541833	6.060584583625134	6.083197268469371	6.013751468467545	5.89657	5.861425329436933	5.964726669441383
Con_Pmod_vs_Con_Scr	O60925	PFDN1	0.0377274	20.575679513198587	0.8483695551986722	0.41538353132471006	0.8325437710232337	-5.57959	20.555424414755127	20.586603806641804	20.595768383259227	20.645197454007217	20.599327521881545	20.60645372730586	20.46394003236688	20.65023771607203	20.63305611171248	20.5699	20.518515743820807	20.483682052393867
Con_Pmod_vs_Con_Scr	O60927	PPP1R11	0.012215203714884382	21.774790917764232	0.20077513544840406	0.8447573068403447	0.9695277565189427	-5.91348	21.58587792080202	21.663366726028052	21.733915963080236	21.724644264836087	21.70005548477425	21.59510647144462	21.91115485145129	22.07241188479763	22.12470849688007	21.764100940272797	21.769431632019835	21.652716376783893
Con_Pmod_vs_Con_Scr	O60934	NBN	0.15438538307256522	17.935529697312262	2.8536340769206117	0.016567086397620553	0.4768906246440572	-2.93789	17.752911767432373	17.807375930182268	17.95790552747335	18.021046619093465	18.014541500971767	17.945761254240455	17.799415100779722	17.836	17.748439979064834	18.0962	18.199094600799125	18.047683258723783
Con_Pmod_vs_Con_Scr	O60936	NOL3	-0.00706636	18.76495672888168	-0.06033	0.9530396018737969	0.9877182362068813	-5.93216	18.800702737803313	18.601136099768468	18.785243025112827	18.910993249095363	18.5498	18.70504794697665	18.902807043739383	18.632137576347606	18.565108626390973	18.80407919583484	18.821455008495775	19.10092865269524
Con_Pmod_vs_Con_Scr	O60942	RNGTT	0.027905016444336184	16.471905708568478	1.374944620428261	0.19812291839154583	0.721058	-5.05276	16.406745837318628	16.45679674145881	16.448231260382954	16.47565006258627	16.458290672256947	16.461548153650188	16.506507044693198	16.544364219772678	16.50297995140189	16.46064019899345	16.469653128315645	16.471461231991096
Con_Pmod_vs_Con_Scr	O75027	ABCB7	-0.0298833	24.74814801377205	-0.890055	0.3936145122472565	0.827785	-5.54528	24.685295376351363	24.7041	24.79207565752601	24.70790950127883	24.701263817814123	24.68263249703171	24.880809449256777	24.878622604644576	24.807745134160022	24.69503518385924	24.76051573038688	24.68178639194275
Con_Pmod_vs_Con_Scr	O75030	MITF	-0.0533295	16.050300652193506	-0.566443	0.583142	0.8949725986862899	-5.77286	16.229994584527194	15.928169601099668	15.958592349993957	15.950444503915664	16.07969156552861	15.926631913670596	16.17962236617981	15.995346510560076	16.232310931336922	16.05826721935625	15.901882071442907	16.162654208710403
Con_Pmod_vs_Con_Scr	O75044:P0DMP2:P0DJJ0	SRGAP2:SRGAP2B:SRGAP2C	0.0053243	20.541645842788597	0.14422440408788698	0.8880874661910871	0.9760192068290906	-5.92341	20.50429594664135	20.507901914295942	20.60250690655864	20.58573326843988	20.497298077647788	20.547646336014207	20.556952326044744	20.61058514493417	20.503434561846788	20.521198173495257	20.55914093059812	20.5031
Con_Pmod_vs_Con_Scr	O75063	FAM20B	0.00377933	19.079184790223714	0.14032302865819865	0.8910927821194811	0.9763925020716006	-5.92398	19.037229772449116	19.06051160599723	19.013121735871007	19.013749077198792	19.042349850266845	19.06610217008894	19.1115	19.091167416689697	19.03157365707558	19.143408341421708	19.145367544487492	19.19416593613437
Con_Pmod_vs_Con_Scr	O75071	EFCAB14	-0.0357268	15.278223602739635	-0.380196	0.7114708705790412	0.933715	-5.86077	15.440360903558874	15.343885690314703	15.326916452971885	15.241	15.342283084363531	15.42073656539336	15.21495934233806	14.977477785953155	14.79250143036984	15.333813267453344	15.378630877041084	15.526154947233277
Con_Pmod_vs_Con_Scr	O75083	WDR1	-0.0882478	26.70124482405722	-2.81848	0.0176142	0.4805242302543434	-2.99233	26.723498511831547	26.711648112575876	26.622606238847112	26.567704064587737	26.61049758432268	26.614807910479307	26.786253293724094	26.750348645210373	26.811590562460196	26.744525293112368	26.702698088773012	26.768759582762335
Con_Pmod_vs_Con_Scr	O75094	SLIT3	0.011564831989211655	19.80364180797878	0.2210037864600268	0.8293799916057957	0.9659199251771812	-5.90915	19.841996464734713	19.97512285162764	19.979548653857353	19.95155271859085	19.90806126204822	19.97174848554828	19.58470414865126	19.737801390413985	19.60230307155503	19.707806334375793	19.763507472920367	19.61954884142189
Con_Pmod_vs_Con_Scr	O75096	LRP4	0.0758317	13.706813846282378	0.9360234197653721	0.3705447620541654	0.8174183223812467	-5.50583	13.81812161336902	13.598716158975892	13.669032844391756	13.810125044185702	13.718245768345474	13.784994795208071	13.754737548588755	13.693996189763244	13.584518927511574	13.655739116869672	13.53428610634535	13.85925204183403
Con_Pmod_vs_Con_Scr	O75110	ATP9A	0.0341277	19.709061371841845	1.1715549480145586	0.26758744982750127	0.7470827452808014	-5.27884	19.695274107809844	19.743325243976443	19.781667401675325	19.77589099098789	19.774989117563276	19.771769802937698	19.66100661127645	19.652	19.602844976602928	19.66708690100604	19.732686907015697	19.65017730788596
Con_Pmod_vs_Con_Scr	O75113	N4BP1	0.0039222	17.285449716359565	0.14539404212201154	0.8871868262986686	0.9760192068290906	-5.92324	17.273559119837678	17.193918687177355	17.281092020172633	17.277068461503934	17.254724707512498	17.228543263739226	17.309101687044368	17.26750837823148	17.26766705601263	17.348274826837326	17.34589791805635	17.378040470189315
Con_Pmod_vs_Con_Scr	O75116	ROCK2	-0.0104366	21.58924519072113	-0.520844	0.6134139471242261	0.9064206528851478	-5.79743	21.57215001811475	21.549160039296357	21.57640810992096	21.579232820039305	21.538651689618565	21.54852389489221	21.643516134747987	21.61848260665508	21.61174429894344	21.599977667541584	21.600850816245124	21.63224419263822
Con_Pmod_vs_Con_Scr	O75122	CLASP2	-0.0214502	20.368979408998648	-1.01911	0.33133437702542257	0.7880879403737766	-5.43038	20.36462641650317	20.368629910600543	20.35179182340381	20.359636194631744	20.310302452875444	20.350758999308944	20.394458724501437	20.43083970680298	20.40439959485004	20.366526686669843	20.341056065837353	20.384726331998476
Con_Pmod_vs_Con_Scr	O75131	CPNE3	-0.100381	27.135401962102414	-1.49106	0.16572000844885143	0.701815	-4.91288	27.184493877461787	27.130428753632906	27.081346172317243	26.931789760847415	27.003686726282517	27.159649802265328	27.266973126057508	27.146505157288445	27.010707573366208	27.21603498970737	27.267359648955775	27.22584795704647
Con_Pmod_vs_Con_Scr	O75143	ATG13	0.0626382	22.200022719086093	0.8466392686647837	0.41630453045473403	0.8326474820971248	-5.58099	22.08804254944056	22.092996698121887	22.252056951028607	22.37201456457757	22.112738791161533	22.13625747343923	22.08255872381311	22.28821318832997	22.224750595738744	22.26794061000442	22.22932955151805	22.25337293185942
Con_Pmod_vs_Con_Scr	O75145	PPFIA3	-0.00996697	20.18493765815031	-0.299746	0.7702927467700573	0.9534662397481767	-5.88836	20.200416901811916	20.22127427274813	20.127981169263503	20.11800283900976	20.225732938497572	20.176035651851805	20.241672941852094	20.20095075247829	20.245802085312743	20.15020912996412	20.126794533513735	20.18437868150007
Con_Pmod_vs_Con_Scr	O75146	HIP1R	-0.0194671	20.954893387639224	-0.575135	0.5774636658618526	0.8906654304829315	-5.76796	20.91220652830601	20.92634940574875	20.99078238103598	20.9402	20.88991963891387	20.940773516631573	20.981384721094557	21.062380062516368	20.95328778659613	20.95940479249248	20.98606195311498	20.91592603651377
Con_Pmod_vs_Con_Scr	O75147	OBSL1	0.0601526	16.692381946538678	1.5370855524016944	0.15420140555467035	0.6977758210767049	-4.85548	16.61530493275648	16.617399817146698	16.715761767772342	16.760742659185585	16.684607142133633	16.68357461933443	16.68526690499253	16.706528316609365	16.59089963004463	16.719573670570906	16.745574456827686	16.783349441089833
Con_Pmod_vs_Con_Scr	O75150	RNF40	-0.0400671	17.90525377526568	-1.65138	0.12857813960128345	0.6687490965699084	-4.70855	17.948361864697254	17.884798662961362	17.912449932502632	17.854760257577595	17.89018506258184	17.880463783072084	17.951372580003778	17.900025441339807	17.88844958648039	17.910537095339777	17.905684263573086	17.93595677305855
Con_Pmod_vs_Con_Scr	O75151	PHF2	-0.020767	13.611893181037173	-0.770451	0.4582240552134086	0.8479055457704144	-5.6399	13.577316517776488	13.540672627502335	13.61140991136042	13.59096763784745	13.52824682258708	13.547883633096486	13.662232858505456	13.73298377412221	13.675443646512392	13.634900542919308	13.613825745477705	13.626834454738738
Con_Pmod_vs_Con_Scr	O75153	CLUH	0.0197936	21.1813	0.46369360156665607	0.6524467963162579	0.9192431008934259	-5.82545	21.22285395690069	21.19472104896132	21.17665416367092	21.265965108548738	21.214494038338465	21.173150912154796	21.13519090081424	21.130312794714097	21.168094556128093	21.15097568864811	21.076086818591897	21.26652736936542
Con_Pmod_vs_Con_Scr	O75157	TSC22D2	-0.00380051	18.92560451397947	-0.0897826	0.9301702858434164	0.9852934302602399	-5.92991	18.944339684012174	18.958056014234103	18.94007015411849	18.865268445783208	18.967275320190684	18.99852055649128	18.8674	18.98861723186098	18.84874032914843	18.93734513390867	18.92423483964257	18.86740574963445
Con_Pmod_vs_Con_Scr	O75165	DNAJC13	-0.000172933	23.27608105243338	-0.00795743	0.993802	0.9988827629439886	-5.93399	23.254000140506403	23.27521100223047	23.27677216287159	23.2701	23.242891193936888	23.29246140945868	23.30952448839519	23.311814601039003	23.267343664527314	23.265694673598254	23.29371317260094	23.253434215641327
Con_Pmod_vs_Con_Scr	O75167	PHACTR2	0.0562	12.157669999458461	1.0114510610379834	0.33481608409631025	0.789192	-5.43756	12.050040490112927	12.054398829939334	12.178419470451477	12.255480055054432	12.13430308123984	12.061675803148304	12.188253492326186	12.336994638889088	12.32406951748569	12.115772013890911	12.077436773814073	12.115195827149272
Con_Pmod_vs_Con_Scr	O75170	PPP6R2	-0.0460135	20.835249073726864	-1.78698	0.10315803879439936	0.6560408370556167	-4.52691	20.88050448279966	20.89327913061241	20.8264	20.815283287618612	20.81499085228893	20.83185178424496	20.85401637509658	20.83653792199604	20.840150490687886	20.801007892874875	20.771890904197264	20.857093098285336
Con_Pmod_vs_Con_Scr	O75175	CNOT3	-0.00320474	20.543694612601485	-0.153719	0.8807813283475363	0.9748738698643601	-5.92197	20.537186672629147	20.49674647461987	20.51038963441251	20.487219896275818	20.514915451254147	20.532573201313653	20.592690246057582	20.562174860914048	20.552731022989025	20.582049560894163	20.59009903800299	20.565559291854843
Con_Pmod_vs_Con_Scr	O75179	ANKRD17	-0.014802	20.439057524255063	-0.575292	0.5773616881096244	0.8906654304829315	-5.76787	20.45463433382785	20.4472	20.404069425384844	20.42939115335515	20.41014827582822	20.422006250746893	20.45719211174269	20.452350953904883	20.45778816562688	20.439	20.398088574759463	20.496767180059965
Con_Pmod_vs_Con_Scr	O75182	SIN3B	0.012517290808929715	16.885435785565065	0.5239684720052363	0.6113142767183369	0.9055466877389206	-5.7958	16.86171241400969	16.843655081215378	16.88956677339849	16.916662281606737	16.841922245950425	16.873901613493175	16.909160570402328	16.927236722803585	16.88417009025876	16.88571128648566	16.883340611888276	16.908189735268298
Con_Pmod_vs_Con_Scr	O75190:Q7Z6W7:Q8NHS0	DNAJB6:DNAJB7:DNAJB8	0.024276270172343573	21.408191807553493	0.7435732657470792	0.47364350843307934	0.8506867547580212	-5.65951	21.410678618406124	21.49692138300233	21.515588720261064	21.51307679389167	21.51965604436505	21.463284693929825	21.303977033754983	21.3887	21.309623566714684	21.313441078474376	21.32814632726454	21.335219490348862
Con_Pmod_vs_Con_Scr	O75208	COQ9	6.912496608002527e-4	16.002285334944446	0.019817362203764993	0.9845651669473838	0.9959692207275997	-5.93382	16.01768498068065	16.058545470019407	15.999770553140284	16.085614457616234	15.97990946155819	16.012550833648337	15.941233298716032	15.868201941551472	15.947435206540344	16.013387870295578	16.014700208536944	16.088389737029896
Con_Pmod_vs_Con_Scr	O75223:M0QZK8	GGCT:NA	-0.0281257	19.30905934601521	-1.23581	0.24378943669313127	0.7432859755095039	-5.21021	19.36549364495966	19.32273514339417	19.297273788251733	19.29069038755627	19.282627893684065	19.32780723699505	19.326765572421003	19.32323479194787	19.3258	19.29208122983667	19.258665941576865	19.295511285578257
Con_Pmod_vs_Con_Scr	O75251	NDUFS7	-0.0560367	20.853169970846132	-2.36923	0.0384885	0.5358613997467039	-3.68213	20.87716654560988	20.903632439671043	20.886614866934146	20.821900492235244	20.832819709432933	20.84458366521909	20.87612604969045	20.81468107194022	20.795293053007992	20.838381101780573	20.876633574122017	20.870207080509992
Con_Pmod_vs_Con_Scr	O75298	RTN2	0.17595921399152203	18.2771	4.081566710377448	0.00204855	0.304281	-1.0829	18.13017821628113	18.115	18.23226737198018	18.360390951960063	18.343505136102895	18.301408430943106	18.12642525891148	18.234	18.21951616460523	18.451335172932943	18.46483571299378	18.346223149748702
Con_Pmod_vs_Con_Scr	O75306	NDUFS2	0.0133127	22.383885104615864	0.5938046870322109	0.5653689025503619	0.8865401293506525	-5.7572	22.39756151909277	22.396165689512717	22.425158027701464	22.41762744879061	22.401239533392385	22.439956449424308	22.33106015378778	22.35936361555934	22.29942185195753	22.38278450788024	22.40085670792341	22.355425750367825
Con_Pmod_vs_Con_Scr	O75312	ZPR1	-0.0411169	22.621929918771993	-1.7144	0.1161354066822414	0.6665809340429043	-4.62506	22.676354217153847	22.655911573080843	22.62022374320691	22.625560470423306	22.59242721885134	22.61115120521052	22.6497	22.62713489531564	22.683920438757827	22.57706408507344	22.54499192856479	22.59874200657485
Con_Pmod_vs_Con_Scr	O75319	DUSP11	0.10567423851179569	12.87450186262803	1.8024240909084097	0.10057391212686231	0.6500731956563556	-4.50577	12.712803851733613	12.727904694416974	12.930371343625437	12.969734823791793	12.90154238918712	12.8168	12.977653210142554	12.992599708414032	12.91320006964075	12.81908664658636	12.907965805464547	12.82433441620068
Con_Pmod_vs_Con_Scr	O75323	NIPSNAP2	0.0851646	18.26057679221003	2.556422746330468	0.0278115	0.5084436347853483	-3.39667	18.18456799367825	18.21922982345563	18.28993277803997	18.324170137741568	18.331189648661933	18.29386469738477	18.21549044808468	18.190262287110436	18.172866308563176	18.28637071074268	18.363114203177595	18.25586246987968
Con_Pmod_vs_Con_Scr	O75326	SEMA7A	0.013120863479681333	23.25528357892798	0.20654296672620834	0.8403654940046817	0.967768	-5.91229	22.99561730485815	23.023694568634184	22.892166690674983	23.04591236358607	22.96087816255458	22.944050628465696	23.5049	23.45372591424792	23.559879253147844	23.53313949216819	23.43916103760533	23.710258299812025
Con_Pmod_vs_Con_Scr	O75340:A0A6Q8PH81	PDCD6:PDCD6-AHRR	-0.0564312	20.494714380981566	-2.5382	0.028707280274023153	0.5084436347853483	-3.42462	20.482505338926497	20.53128872278711	20.476102817919465	20.454387208941956	20.409482704810245	20.456733512501874	20.574744087208835	20.544169067051016	20.57206377338403	20.4693	20.48873836989475	20.477055216960824
Con_Pmod_vs_Con_Scr	O75347	TBCA	-0.0590525	22.06227589845839	-1.53223	0.15538276366650142	0.6977758210767049	-4.86158	22.13198844410283	22.06771778373056	22.052935445243563	22.065327209288156	22.009072470288825	22.001084529910525	22.072849097857578	22.026996615548462	22.10223514188069	22.06684873235031	22.002613447572163	22.147641863727028
Con_Pmod_vs_Con_Scr	O75348	ATP6V1G1	0.021021042106141863	20.564515332394723	0.7411129486017203	0.4750712284369376	0.8506867547580212	-5.66127	20.615531935626983	20.595550333338643	20.56631905871425	20.650285517562857	20.58750269145657	20.602676244978895	20.532266554051393	20.491251644299247	20.568713026398736	20.51799607379494	20.488122032197413	20.557968876316743
Con_Pmod_vs_Con_Scr	O75351	VPS4B	-0.0537339	23.99453316038561	-2.92274	0.014687720981843271	0.45880751407315945	-2.83085	24.01475341416469	24.01217803022378	23.994120807127068	23.95452059695812	23.93271998362351	23.972609879523247	24.015098300998815	24.04099109544842	24.0338	23.998284360101486	23.98407653491335	23.981294302285654
Con_Pmod_vs_Con_Scr	O75356	ENTPD5	-0.0105279	18.07572795482284	-0.440462	0.6686415392434264	0.9238497099653658	-5.83595	18.06627053170868	18.08819616560685	18.037079163949173	18.055833908074803	18.061197513994873	18.04293071038528	18.09671343827491	18.041572747313587	18.123725695027296	18.09186459741507	18.093279546462902	18.110071439660633
Con_Pmod_vs_Con_Scr	O75362	ZNF217	0.0834264	10.543247943870504	1.3799890318802903	0.19661130852851935	0.721058	-5.04684	10.38241044726184	10.535789856131078	10.569698568547553	10.562232866954442	10.646474773098406	10.529470418181962	10.541133777336103	10.62912635023128	10.420895548667122	10.518177157913296	10.575942110749342	10.60762345137364
Con_Pmod_vs_Con_Scr	O75367	MACROH2A1	-0.0251287	19.206905910121638	-0.527768	0.6087658262584644	0.9049682140860942	-5.79382	19.204509549676736	19.182286486785262	19.186109223870854	19.10093008077997	19.156655131165575	19.23993397089817	19.256584993365497	19.265489135164938	19.24699252314161	19.24864107474765	19.29633672528876	19.098402026574615
Con_Pmod_vs_Con_Scr	O75368	SH3BGRL	-0.00191292	24.294945064512575	-0.0727001	0.9434277738465293	0.9875198509272853	-5.93132	24.18270399363712	24.25699369796278	24.22752542891888	24.19704894623591	24.238	24.22640589966361	24.385145011134775	24.36484585152985	24.359530071093797	24.356006847200657	24.41028362564409	24.33482187255502
Con_Pmod_vs_Con_Scr	O75369	FLNB	-0.0436621	27.632743269630303	-0.947504	0.3649362564311457	0.8127709357075515	-5.49572	27.51723251050879	27.56366550061774	27.442451249955266	27.450163572800495	27.518990553897613	27.423208733595384	27.717695773580456	27.703899224680153	27.8285	27.810041258592744	27.746653685737225	27.870452094768563
Con_Pmod_vs_Con_Scr	O75376	NCOR1	-0.0423392	14.6992	-1.58771	0.14234342335040487	0.6917715242798214	-4.79114	14.709076460450497	14.670325197370564	14.668395724564505	14.609010743009865	14.653869624847824	14.657899383250328	14.795858043414835	14.705919610310971	14.74748178311882	14.719840519877115	14.745794824973125	14.706468339904363
Con_Pmod_vs_Con_Scr	O75379	VAMP4	0.00337811	17.10266793045033	0.13265558720514978	0.8970043843345299	0.9771853590929308	-5.92505	17.085010490606006	17.005089975185236	17.025318740735823	17.041611604778936	17.032607999325663	17.051333923830978	17.169213004092843	17.17436720481554	17.222797438908778	17.167618639041454	17.13056810935504	17.12647803472766
Con_Pmod_vs_Con_Scr	O75380	NDUFS6	0.00779089	19.672368657980734	0.3100847606401051	0.7626380972521147	0.9496246710092007	-5.88517	19.665714297098297	19.64983959721002	19.67153721476098	19.661139960556092	19.643745220954685	19.7056	19.68948032442747	19.674547658002098	19.637862139908776	19.691445201978283	19.72365452640145	19.653879165650466
Con_Pmod_vs_Con_Scr	O75381	PEX14	-0.0291904	21.75240442594283	-0.881246	0.39814775364605814	0.8278546143007929	-5.55265	21.836753966570953	21.737815687871983	21.74313456330252	21.730056757464357	21.729727721324785	21.770348588817036	21.78040140141534	21.67390497051045	21.719983688300044	21.76590948694695	21.756610574299696	21.784205704489885
Con_Pmod_vs_Con_Scr	O75382	TRIM3	-0.00362804	19.79548590861885	-0.185824	0.8561672452019106	0.9700238487574436	-5.91642	19.87350006180414	19.877925387829595	19.85713697000182	19.868628707933407	19.866446056647064	19.862603532620007	19.69706760544376	19.73148108602742	19.720000577094048	19.73392952892413	19.702537235533804	19.754574153567027
Con_Pmod_vs_Con_Scr	O75390	CS	-0.0161785	21.893737292649735	-0.684767	0.5085049028795077	0.8605521265437722	-5.70024	21.996902896996964	21.981021480219315	21.95365602622712	21.955373735931335	21.945998724567747	21.981672414938547	21.763133533647313	21.766157251391085	21.818895604216827	21.87488187159235	21.86278899164725	21.824364980420953
Con_Pmod_vs_Con_Scr	O75391	SPAG7	0.029264210089495535	14.845310448910492	1.3273489383374597	0.21287085392892496	0.7305565329816756	-5.10793	14.83592519546698	14.788397649076224	14.824892963198018	14.861	14.843807132511724	14.832181924978183	14.88204439234078	14.836890308979886	14.846339723979227	14.853078227756534	14.848325327133008	14.890823160985548
Con_Pmod_vs_Con_Scr	O75394	MRPL33	0.0779492	15.807953260375445	2.898668557252123	0.015316716765807316	0.4673795701462449	-2.86814	15.804261540398102	15.735668808936184	15.79865810743285	15.845468590262168	15.846053193903304	15.880914281250329	15.840348259813204	15.800176899009024	15.776161619291685	15.79164362502238	15.817434741744648	15.758649457441464
Con_Pmod_vs_Con_Scr	O75396	SEC22B	-0.0591344	29.28267422780619	-1.43586	0.18051009765128928	0.7137532972740651	-4.98029	29.369698173227476	29.365537746167053	29.25030432053865	29.251474395948293	29.272516005838742	29.2841	29.28619994846801	29.30617479828526	29.417700762369655	29.227284084436075	29.153427886357008	29.20762596340264
Con_Pmod_vs_Con_Scr	O75400	PRPF40A	-0.0097942	18.33226288232491	-0.42513	0.6794281307219818	0.9256352937315804	-5.8426	18.354363439631783	18.345538398651883	18.349530287122636	18.31648304990507	18.341729001761458	18.36183745979211	18.304766601696898	18.295933600045572	18.305974239055352	18.34884984192535	18.37125922187395	18.290889446436836
Con_Pmod_vs_Con_Scr	O75410	TACC1	-0.0211551	19.567417139038508	-0.815324	0.4332120707932732	0.8383377081920187	-5.60579	19.623779713044627	19.607301031169076	19.55282151841173	19.565364598688156	19.578225793528276	19.576846603497692	19.55284453606046	19.5259	19.56673765299885	19.55269829635695	19.51409803983082	19.592419435921563
Con_Pmod_vs_Con_Scr	O75414	NME6	-0.0326038	18.762862538992295	-0.916232	0.3803569506929846	0.822423	-5.52302	18.704329892273375	18.730992808990173	18.785011244666865	18.7133	18.692724852155976	18.716476338914937	18.790604181266715	18.840189559362138	18.813599848092068	18.804147290833814	18.85471612328041	18.70823691627718
Con_Pmod_vs_Con_Scr	O75420	GIGYF1	-0.0597345	17.151578206997833	-0.836484	0.4217379365813073	0.8348664894343217	-5.58912	17.035739572170325	17.148247451068123	17.135661926550764	16.925165689034483	17.097669528721482	17.117610279982657	17.216107253209675	17.25180026344912	17.092416380286505	17.2669	17.391625760512422	17.139998478006643
Con_Pmod_vs_Con_Scr	O75427	LRCH4	-0.00122011	19.82995446036407	-0.0547964	0.957342	0.9881015666745631	-5.93249	19.841413712720133	19.839067817339433	19.822291762977997	19.82493313748503	19.85481474218303	19.81936508650436	19.83263289652207	19.793368103272723	19.802548313901717	19.827988376059963	19.819677001109397	19.881352574292997
Con_Pmod_vs_Con_Scr	O75431	MTX2	-0.0118585	22.401519708124816	-0.290849	0.7769004488820369	0.9541895079314293	-5.89102	22.458728898973497	22.44982199919584	22.403518423084737	22.366738305181112	22.435567290926475	22.474188363362043	22.369508209934686	22.323931778165765	22.40000937404959	22.40527585959736	22.43795224802896	22.292995746997743
Con_Pmod_vs_Con_Scr	O75436	VPS26A	-0.0132567	23.81088672810418	-0.468816	0.6489010401647788	0.9178950066350396	-5.82306	23.817469587640183	23.780628659345368	23.76317450964556	23.76110545205437	23.741103086943788	23.819294258723005	23.868155721483618	23.790771371492255	23.804294572126913	23.857758656500454	23.87893127264296	23.847953588651677
Con_Pmod_vs_Con_Scr	O75438	NDUFB1	0.21180971494322876	23.20156899759544	1.6220584645215683	0.1347635069343406	0.6804148187043144	-4.74681	23.112391029888748	23.29633944529499	23.123816545384702	23.34978884327124	23.394860978077904	23.42332634404896	22.856797876334248	23.317232083048665	23.40196344869014	23.20188143397314	23.09202673802151	22.848403205111055
Con_Pmod_vs_Con_Scr	O75439	PMPCB	0.00469103	22.928208352816565	0.18198019573629406	0.8591061516808467	0.9700238487574436	-5.91714	22.942070678404512	22.998319646915533	22.994539287280563	23.02335561937609	22.970318182073235	22.95532891183903	22.865843227920298	22.89270474357964	22.870484118452207	22.857862268437163	22.858750842988684	22.90892270653183
Con_Pmod_vs_Con_Scr	O75448	MED24	0.0447233	13.571826926466343	1.66485	0.12582233261298567	0.6678546603679277	-4.69085	13.54761641841633	13.521453380821589	13.596908964169142	13.608848641430084	13.59885706147386	13.59244308756344	13.533032891893852	13.58739404045984	13.561853882254656	13.58852822745207	13.598115859588418	13.52687066207283
Con_Pmod_vs_Con_Scr	O75449	KATNA1	-0.183614	12.837414067276685	-3.2276	0.00865435	0.40001201681270493	-2.35989	12.854567073952955	13.023271797183249	12.877105837953517	12.693151086432252	12.720090610562677	12.790861460004518	13.043003102894714	12.952303975737566	12.848519012209842	12.68678940419023	12.772566701735652	12.786738744463038
Con_Pmod_vs_Con_Scr	O75477	ERLIN1	-0.00883128	22.03614551475684	-0.293963	0.7745852611919328	0.9541895079314293	-5.8901	22.0352	21.96680157506073	21.9797	22.00962853628304	21.98189617041592	21.963694357095637	22.11932451180248	22.044219078996655	22.13720523149992	22.062288409212897	22.037239634410614	22.096537357545667
Con_Pmod_vs_Con_Scr	O75489	NDUFS3	0.010208215599920578	22.779407885852205	0.5077805044892689	0.6222315650786021	0.9092250255657002	-5.8041	22.7835	22.780178034572995	22.79447739586573	22.804788774399025	22.767244604964898	22.81670422803046	22.76972542754021	22.79367554417269	22.758470824558028	22.766606210349256	22.774124119906094	22.74344193571116
Con_Pmod_vs_Con_Scr	O75494	SRSF10	0.029612305004050654	16.632357685272467	1.1235211014645199	0.28655012630999743	0.7614365538045824	-5.32835	16.587418765920066	16.59441098945107	16.613551474345623	16.60673305655195	16.63309306752864	16.64439202064832	16.62253077467277	16.618868312978037	16.618602579542728	16.692134963409586	16.732462038862767	16.62409417935804
Con_Pmod_vs_Con_Scr	O75503:A0A1B0GWJ7	CLN5:NA	0.0267274	19.845198472830447	0.8542012644108853	0.41228962474579434	0.8315853032974126	-5.57488	19.82284941254808	19.889118733524256	19.92206667113221	19.93770350257526	19.87794663273581	19.898566909119783	19.84982605382756	19.84910197451836	19.78783765713416	19.744089266255255	19.80534613331096	19.75792872728367
Con_Pmod_vs_Con_Scr	O75506	HSBP1	-0.00984542	27.508843883915485	-0.0853684	0.9335941319601562	0.9854296731349035	-5.9303	27.30221887947884	27.808440027566405	27.611360840152884	27.62432480642512	27.53120106706509	27.536957613214327	27.35320395079779	27.580849981383484	27.270389565935865	27.406005424690548	27.497013828577305	27.58416062169816
Con_Pmod_vs_Con_Scr	O75521	ECI2	0.0395328	20.59656658642541	1.3529681122304962	0.20482271305461325	0.7238213410594051	-5.0784	20.68759759526832	20.65938059389605	20.68484947654762	20.75251878202315	20.72428209456275	20.67362530199161	20.41801706351888	20.44954548794427	20.510166472958183	20.544959486663345	20.501298187361684	20.552558494369087
Con_Pmod_vs_Con_Scr	O75525	KHDRBS3	0.044567130103345676	16.99944662591322	0.6334211143191181	0.5401752249804521	0.8771129357257895	-5.73331	16.641274292160507	16.713540183041538	16.823403210270186	16.747512545639413	16.746090195507776	16.818316334635078	17.303071300255517	17.377180346090043	17.18233687079122	17.211015370572355	17.34469865400265	17.084920207992326
Con_Pmod_vs_Con_Scr	O75528	TADA3	-0.0421279	7.437482399111153	-1.50182	0.16296313664313575	0.701815	-4.89956	7.419167999799816	7.3915130120754196	7.413196161462412	7.366146406116714	7.39771	7.333632386600172	7.54229	7.534232059450144	7.5123	7.431992858074126	7.402412680869395	7.5051846521910335
Con_Pmod_vs_Con_Scr	O75531	BANF1	0.017733121080244274	17.038068347615237	0.3052756928523227	0.7661953210028718	0.9514871399333666	-5.88667	16.95350409759223	16.855732402124776	16.95706890595845	16.946815075484878	16.87061293045436	17.002076762976944	17.258061818969047	17.090196514133936	17.08985329841461	17.12846076913464	17.236717079453552	17.067720516685416
Con_Pmod_vs_Con_Scr	O75533	SF3B1	0.00980828	19.103009558779192	0.46334982001137154	0.6526851047206995	0.9192431008934259	-5.82561	19.088769907483982	19.096275305933258	19.115158646947783	19.100610211331375	19.104657723523285	19.12436076191097	19.108027480227836	19.108140658352667	19.084917668002905	19.103298116460273	19.134357704385852	19.067540520790107
Con_Pmod_vs_Con_Scr	O75554	WBP4	-0.0326855	15.396022835359176	-1.31513	0.21680070379669172	0.7328496892578961	-5.12188	15.347264900831345	15.425334025524116	15.35370776621959	15.326321494869925	15.33062008151846	15.37130856984644	15.430422465229306	15.45853633580905	15.42034908230859	15.425861649423624	15.439451620299474	15.423096032430196
Con_Pmod_vs_Con_Scr	O75569	PRKRA	0.0022692	21.68586456880456	0.11433354464827467	0.9111566599790221	0.9810535926780501	-5.92735	21.70559433368241	21.669032711988724	21.698266549716113	21.68594653160436	21.68561127869467	21.70814339639695	21.692949264800525	21.68039009457192	21.682162317056154	21.68260676124398	21.693924506980032	21.64574707891889
Con_Pmod_vs_Con_Scr	O75575	CRCP	-0.0915114	11.221059695524605	-1.16901	0.26856522555272344	0.7473576335341932	-5.2815	11.441928394651711	11.423852890742715	11.205433787606385	11.221592099983251	11.322840325363154	11.252248307912158	11.07798837486672	10.95194601742196	11.189247394064294	11.191205529018111	11.07905845491566	11.295374769749154
Con_Pmod_vs_Con_Scr	O75586	MED6	0.0872727	12.256022014374748	1.7617876467939206	0.10750542968302895	0.6600349394757536	-4.56121	12.131565461805708	12.193593336567552	12.244389886814478	12.338467515522176	12.214676691099294	12.278222498192855	12.327610168692066	12.352124256007286	12.185610143306375	12.22312290489604	12.26731274474949	12.315568564843666
Con_Pmod_vs_Con_Scr	O75592	MYCBP2	0.054511188643441955	19.206441935716974	1.8540389503269856	0.0923599	0.6378026471319278	-4.43448	19.113300861533375	19.16058834280676	19.195642000605396	19.230195681762854	19.20316365987067	19.199705429242343	19.218508276300767	19.302599396015367	19.20314802543213	19.21060077162981	19.219515916774572	19.220334866629663
Con_Pmod_vs_Con_Scr	O75600	GCAT	0.013613521416560914	14.457767201014697	0.17992397520139408	0.8606793134231062	0.970666	-5.91752	14.120926650325634	14.254352426885095	14.230846081153526	14.073171666113268	14.376827615857726	14.19696644064294	14.732925986619057	14.622197154176984	14.571008690290396	14.726394546246958	14.870845893462295	14.716743260402472
Con_Pmod_vs_Con_Scr	O75607	NPM3	0.022186724504202004	16.97440253304243	0.8921882104804957	0.39252220611578537	0.827785	-5.54349	17.003821405087375	16.956356958343996	17.014942450182765	17.04299721819399	16.981106740522502	17.017577028410233	16.897181829456162	16.94240591985409	16.93210604263889	16.986621211378097	16.973459619631928	16.944253972809136
Con_Pmod_vs_Con_Scr	O75608	LYPLA1	0.016105723218249324	21.400641569550043	0.6675520435642948	0.5189972661526954	0.865441	-5.71159	21.470702027614152	21.513687215617555	21.5153	21.534315755723885	21.506187330191324	21.507505338103925	21.2724	21.28808714066504	21.319732783161573	21.298428500049056	21.325202369010785	21.256140252423112
Con_Pmod_vs_Con_Scr	O75616	ERAL1	-0.0480833	21.688210757851294	-1.5797	0.14416447789442022	0.694261	-4.8014	21.812565459980625	21.74044295209208	21.74552952329287	21.71147379923839	21.682054356615826	21.76075998113316	21.694121379397735	21.638597323702907	21.6089	21.61601323386167	21.607533635557058	21.640493831010293
Con_Pmod_vs_Con_Scr	O75636:Q15276	FCN3:RABEP1	-0.0217461	21.12563418583762	-0.513363	0.6184558627933318	0.9081798066725685	-5.80127	21.089227845564913	21.032497806564773	21.0857	21.08108971571827	20.986554123766357	21.074572894612693	21.22998569680009	21.14919528808702	21.06681836494827	21.202629306266054	21.227118272853037	21.282191502627345
Con_Pmod_vs_Con_Scr	O75643	SNRNP200	-0.00623213	19.779462392499326	-0.219753	0.8303287906585586	0.9661827085635295	-5.90943	19.722679832913887	19.768213859491567	19.76552727490541	19.73686065600286	19.73346834196071	19.767395576569168	19.833782791051433	19.789450409710778	19.77659189627217	19.807024725834935	19.875143804302603	19.777409540976414
Con_Pmod_vs_Con_Scr	O75663	TIPRL	-0.0191806	22.832039352592922	-0.644255	0.5333990536028272	0.8747840053513282	-5.72653	22.897595132071487	22.85516421365276	22.843539373433483	22.86982467177396	22.84664003952749	22.82229232265333	22.766225568853464	22.772698781353785	22.836212012556803	22.834306926390003	22.774012883618536	22.865960305229947
Con_Pmod_vs_Con_Scr	O75665	OFD1	0.022449189052466068	19.41419030901204	0.7412325245854933	0.47500177583772607	0.8506867547580212	-5.66119	19.44982322966092	19.44135338152726	19.43477538735925	19.503272779759225	19.45619670320301	19.433830082742578	19.37353894586227	19.29762283131772	19.4218	19.379429820354375	19.3841	19.394525167868775
Con_Pmod_vs_Con_Scr	O75674	TOM1L1	0.0518993	20.318852646798366	1.8495565310381887	0.093048	0.6406574806734774	-4.44071	20.258725530736953	20.253820524491804	20.323834234538513	20.34827402325366	20.32316322747112	20.32064105355615	20.31365483110083	20.35977782936802	20.26126460020447	20.34474667177247	20.354407531136577	20.363921703949806
Con_Pmod_vs_Con_Scr	O75676	RPS6KA4	-0.0557503	13.900269603965286	-2.107	0.060378	0.5731478573300511	-4.07299	13.898658939912057	13.901671057026697	13.875001643811531	13.816295993082331	13.834101338052523	13.857683387354244	14.02346547064496	13.942573772582072	13.930560627948346	13.885339647464388	13.91350285042718	13.924380519277117
Con_Pmod_vs_Con_Scr	O75683	SURF6	0.00466572	17.864699582466947	0.19022673395162004	0.8528034691533861	0.9700238487574436	-5.91558	17.828987754357524	17.823223034736845	17.791630359392343	17.827130439778198	17.832080313033025	17.798627564881468	17.93423252163192	17.905717230014886	17.96188339145578	17.885921215372203	17.857441219538526	17.92951994541065
Con_Pmod_vs_Con_Scr	O75691	UTP20	0.0218978	17.71085337593933	0.8870909351818588	0.39513578103618985	0.827785	-5.54777	17.716145375756952	17.684981600088538	17.765090396640293	17.769855662444595	17.72748925416569	17.73456571357976	17.681237750781836	17.7025	17.649987535577456	17.69643658374424	17.70791582688333	17.694069358613266
Con_Pmod_vs_Con_Scr	O75694	NUP155	0.00441471	20.128829248693712	0.2350133960328379	0.8187737125170794	0.9638957433534364	-5.9059	20.09472157432453	20.105677881979787	20.103272485748633	20.10131285261448	20.101119059179048	20.114484168398334	20.14529060741319	20.14691091095836	20.16052119371691	20.164292380681218	20.18075601857368	20.12759185073636
Con_Pmod_vs_Con_Scr	O75695	RP2	0.031057795818739464	22.468307670665343	0.7803269917855796	0.45264023356224625	0.8478061276679586	-5.63253	22.47667753174833	22.494255474824335	22.450230727767945	22.428965825599448	22.58538320820664	22.499988087990737	22.377576481393056	22.41045294456419	22.46616334579968	22.506545042374725	22.49607437070089	22.427379007014125
Con_Pmod_vs_Con_Scr	O75717	WDHD1	0.014310480050856889	4.938605044557217	0.24348226600412676	0.8123804724975779	0.9623052812403227	-5.90385	4.990706296330536	4.942666123580931	4.865119288636926	4.998015370550554	4.922973282573455	4.920434495576959	5.015711051326626	4.8982445521249005	5.0129899207414645	4.870002681059271	4.7950816575913375	5.031315814593647
Con_Pmod_vs_Con_Scr	O75718	CRTAP	0.00538019	22.592813138351044	0.21691150320456395	0.832485	0.9662210520403934	-5.91006	22.573337601836982	22.510973482445294	22.541575833614665	22.53866278679376	22.526640517784397	22.576724175085864	22.652700239117387	22.647505949008472	22.65831410994736	22.6493	22.649823299353177	22.58815472860048
Con_Pmod_vs_Con_Scr	O75746	SLC25A12	0.031291122246276615	24.125414977175502	1.7648851005000024	0.10696215003243634	0.6600349394757536	-4.55701	24.229596043634235	24.219431103194452	24.22369367425457	24.244553084900872	24.25989380602866	24.262147296892536	23.975145191466723	23.938976105994456	23.942482688462697	24.06419117182207	24.08047350867676	24.064396050777997
Con_Pmod_vs_Con_Scr	O75781	PALM	0.0553777	12.098265522240037	1.1458065492624228	0.2776258661922343	0.75832497450126235	-5.30557	12.039591009374313	12.23602123110981	12.134341728562882	12.17831718627678	12.26683880214442	12.130931205740634	11.922251964286422	11.937092380927332	11.994355381667331	12.090051697811663	12.13295479679384	12.11643888218502
Con_Pmod_vs_Con_Scr	O75787	ATP6AP2	-0.0089088	21.72455553315273	-0.3909	0.7037814855974709	0.9313927082650366	-5.85662	21.731383378541217	21.725353752280036	21.753730963539507	21.73659958315915	21.728536913426172	21.71860521040167	21.682345612039367	21.662690001065123	21.615611675679204	21.760145872492803	21.76925544658873	21.81040798861979
Con_Pmod_vs_Con_Scr	O75794	CDC123	-0.0202767	18.328648534885268	-0.522723	0.6121507301910311	0.9060497566474324	-5.79645	18.41296325330266	18.47464025705441	18.385569253425206	18.416888180110227	18.427823146132667	18.36763131388981	18.24680692681318	18.19289679365336	18.24628609375465	18.225990812316457	18.202067361684847	18.34421902648572
Con_Pmod_vs_Con_Scr	O75815	BCAR3	0.00224928	21.23094670104128	0.047758532814839605	0.9628159012348989	0.9890780291391064	-5.93286	21.245260154203677	21.329915589596297	21.246362463713243	21.2466	21.355617027043788	21.226059079339265	21.175241773591527	21.18062308572741	21.153837584034104	21.170931764542075	21.135678170763377	21.30522377616168
Con_Pmod_vs_Con_Scr	O75817	POP7	-0.0307115	14.334778724904593	-0.850816	0.414084	0.8323822947950323	-5.57762	14.40438699246004	14.369220898870129	14.369381497478535	14.304305313711335	14.412576128894212	14.334	14.298117499595785	14.303379289436094	14.241690612141156	14.316122025898236	14.272955634528822	14.391235341404576
Con_Pmod_vs_Con_Scr	O75818	RPP40	-0.0840927	14.611579309353356	-1.17175	0.26751075835110055	0.7470827452808014	-5.27863	14.6028	14.776652416993954	14.665267973961686	14.553354395976491	14.696345853179947	14.542699135817813	14.566899008513484	14.60087366871574	14.795157173484888	14.540889096146762	14.584749694089084	14.413306144767027
Con_Pmod_vs_Con_Scr	O75821	EIF3G	-0.0205833	22.265920733756246	-0.723137	0.48558465032437537	0.8544236236283507	-5.67401	22.295380169327537	22.23343783736686	22.235490531512756	22.24535007397844	22.24334025108903	22.21386831999419	22.284674192535213	22.286290283305156	22.354	22.28171148698712	22.22455777257488	22.29291704738867
Con_Pmod_vs_Con_Scr	O75822	EIF3J	-0.0924051	21.109351999714796	-1.15168	0.2753105925576591	0.7549010077458373	-5.29952	21.356492693237467	21.14394041778355	21.06080822773617	21.004612334547858	21.133007238121003	21.146406410098027	21.034476355490337	20.816301201026217	21.05637453591281	21.2188	21.149175481583264	21.19186453926745
Con_Pmod_vs_Con_Scr	O75828	CBR3	-0.0132004	18.2335	-0.44284	0.6669751680244175	0.9238497099653658	-5.8349	18.181421968825937	18.172908674654572	18.197193417556996	18.167090325898805	18.132305440159087	18.212526962708445	18.331071619260488	18.317214952418823	18.28840054388711	18.272442545047433	18.317455137938033	18.21154568201748
Con_Pmod_vs_Con_Scr	O75832	PSMD10	-0.0365004	20.454958994484354	-1.67995	0.12279626460650361	0.6678546603679277	-4.67091	20.426207598070143	20.432678613369937	20.419656243795625	20.395101953503108	20.361009466266836	20.412929822523363	20.517624071914817	20.547620881204736	20.55246975889898	20.48032465206965	20.480454176842994	20.433430695352044
Con_Pmod_vs_Con_Scr	O75843	AP1G2	-0.121288	12.818374795554913	-0.826383	0.427189	0.8359803685160495	-5.59712	13.270174465877924	12.8698	12.73128712772216	12.677703392892882	12.823818574757889	13.005916702571714	12.771	12.406809140212811	12.481467891644328	12.923461693069491	12.77671516110097	13.082312053534894
Con_Pmod_vs_Con_Scr	O75844	ZMPSTE24	0.0707283	23.54880062948374	1.8690473501208946	0.09009	0.6361599262123389	-4.41358	23.46686606180295	23.483170643080634	23.473981268882955	23.552409312907823	23.599056509452648	23.484737176468503	23.509197530886667	23.50171960926958	23.637333593499335	23.63745715602481	23.623172569439433	23.616506122089532
Con_Pmod_vs_Con_Scr	O75845	SC5D	-0.0278832	22.683755512526037	-0.53173	0.6061148234341107	0.9031606230984041	-5.79174	23.13429073170044	23.110450741496145	22.99020733599177	23.05974714360332	23.056389422337524	23.035162513043495	22.331086306829505	22.242063911016977	22.443025792599737	22.27503701789673	22.20703659424379	22.32056863955303
Con_Pmod_vs_Con_Scr	O75874	IDH1	0.0095234	20.94232252584977	0.22606080738336962	0.8255472125626919	0.96588	-5.908	20.962510545695466	20.99182401975415	21.042718801426297	21.004759836478467	20.974003603160764	21.046860138294637	20.830388145498475	20.928190729238228	20.82366103587787	20.92066413318768	20.963698568585865	20.818590752999373
Con_Pmod_vs_Con_Scr	O75879	GATB	0.041319549753231044	13.65952409547586	1.3207249315099292	0.21499396659809653	0.7320915241917942	-5.1155	13.681430038772245	13.661045216792552	13.726143689933297	13.799560606373692	13.69252986651428	13.700487121869806	13.60765070062636	13.583552490520972	13.579189895564742	13.607017634075897	13.614284388881986	13.661397495784486
Con_Pmod_vs_Con_Scr	O75880	SCO1	-0.00817693	18.200112192378214	-0.163803	0.8730342246213914	0.973537	-5.92034	18.428098293691825	18.280802553171632	18.273487259937035	18.322041230297906	18.239905750540625	18.395910336220417	18.055631779678833	17.978562015282805	17.968038722462396	18.159285718024854	18.110746513565573	18.188836135664676
Con_Pmod_vs_Con_Scr	O75882:Q5VV63	ATRN:ATRNL1	0.045952205499879994	18.546268546252264	1.6700503790721966	0.12477269614376967	0.6678546603679277	-4.68399	18.52414282336417	18.554934478886093	18.53302333771653	18.576665661628216	18.623772519937376	18.549519074900832	18.52300040424691	18.44336721026334	18.496723487198302	18.55115646074779	18.573694549698615	18.60522254643899
Con_Pmod_vs_Con_Scr	O75884	RBBP9	0.0416979	21.424011944720753	1.6021061788141238	0.13912218393845913	0.6853321066323252	-4.77263	21.336621565017964	21.38551300339049	21.36036870207971	21.421990494386755	21.38041979899976	21.405186638263697	21.43478540335276	21.456457202011222	21.50216649791888	21.47898203567926	21.49631557491434	21.429336420634204
Con_Pmod_vs_Con_Scr	O75886	STAM2	-0.0414083	22.816409142821684	-2.43761	0.0341892	0.5307865960767675	-3.57833	22.800485766499353	22.781382009250876	22.784959950583833	22.75485781475558	22.74402444300683	22.74372058628935	22.90420476065033	22.904567698280864	22.9297	22.8227	22.809212751153098	22.81712671909707
Con_Pmod_vs_Con_Scr	O75891	ALDH1L1	0.0909817	17.34602851025137	3.0716317253760947	0.011337565319474113	0.4091882711749287	-2.60043	17.236627192515865	17.227843133989413	17.269973037110663	17.328895029128557	17.384192073335022	17.294301338908536	17.2988	17.37988787579002	17.378679598525483	17.46995981169587	17.439331706235063	17.44383645632194
Con_Pmod_vs_Con_Scr	O75907	DGAT1	-0.0451921	20.598725410524153	-2.4067	0.0360715	0.5358613997467039	-3.62534	20.580585691027032	20.59059089001357	20.58108630477721	20.53061204043313	20.5259	20.560126372762188	20.69719247920089	20.68634411639728	20.657864299355538	20.586542281436657	20.603626643441583	20.584185748954248
Con_Pmod_vs_Con_Scr	O75909	CCNK	-0.0456182	16.873306936067053	-1.16612	0.269683	0.7492963497876827	-5.28452	16.959914952730188	16.85391575370363	16.877259301992478	16.831068274099664	16.83230092081265	16.890866156573637	16.906519918664458	16.85342788140054	16.783268368589948	16.887109569378975	16.858480500608362	16.945551634250094
Con_Pmod_vs_Con_Scr	O75912	DGKI	-0.0361785	18.295532646024235	-0.673812	0.5151668602326196	0.8648448491941181	-5.70749	18.37690764630449	18.483954445687218	18.438766280570636	18.426402955256837	18.471516207262784	18.29317362369958	18.167912173942103	18.086322018574673	18.17109322056315	18.155965986495815	18.169459213155076	18.30491798077844
Con_Pmod_vs_Con_Scr	O75915	ARL6IP5	8.70828431054349e-5	26.911400614957273	0.00104062	0.999189	0.999619	-5.93402	27.12144984443763	27.101363017792945	26.912652897567977	27.012907693409424	27.117098774533332	27.00572054038512	26.73509283699845	26.74066117618394	27.028865395073197	26.77239242397773	26.62212159107044	26.76648118805708
Con_Pmod_vs_Con_Scr	O75923	DYSF	0.029040886624265738	29.48191527865522	0.7924018819746228	0.4458736809284338	0.8459962000829986	-5.62342	29.436968376200053	29.52725603649492	29.435186172781812	29.479052739212744	29.552934148355934	29.454546357780924	29.356333551310495	29.37000924459616	29.45526759959693	29.571589925091263	29.55358532794105	29.590253864500347
Con_Pmod_vs_Con_Scr	O75934	BCAS2	0.017983003804271647	17.538088674357756	0.6664629097134418	0.5196653850484112	0.8658297174842782	-5.7123	17.50632011702948	17.533567908343304	17.56608229282034	17.543200886420962	17.56886285137654	17.54785559180845	17.51396863588666	17.5883	17.54483999127006	17.52838871603293	17.54257715634921	17.47313948623084
Con_Pmod_vs_Con_Scr	O75935	DCTN3	-0.0304835	24.751926369419905	-0.922343	0.3773079302870208	0.822423	-5.51775	24.801706699985377	24.849478371682128	24.766485921425055	24.76396786755812	24.785758404816978	24.77649429801187	24.689124727935393	24.767408441413032	24.817733903816578	24.69610418322495	24.64992921650324	24.658924396666144
Con_Pmod_vs_Con_Scr	O75937	DNAJC8	-0.0169141	15.821664604665141	-0.544343	0.597713	0.8996612922819921	-5.78501	15.853008311389782	15.790013823353918	15.76396538499528	15.7601	15.791885783299264	15.804297446392589	15.858230839920292	15.75171179557458	15.828178291077808	15.884564693083378	15.881269623796031	15.892787405447963
Con_Pmod_vs_Con_Scr	O75940	SMNDC1	0.03314	14.568458027238542	1.1138117815365849	0.290507	0.765002	-5.33816	14.52243946845764	14.490209643038614	14.549241943546704	14.592853262907342	14.51916967124051	14.549288180177784	14.656945475248763	14.638827979094016	14.576407052718915	14.55406640051032	14.560097437389462	14.611949812532426
Con_Pmod_vs_Con_Scr	O75947	ATP5PD	-0.0254104	24.143303872833407	-0.708362	0.49433353953648795	0.8599001604693735	-5.68426	24.275867434487495	24.182606603828702	24.20659384255041	24.162525242536205	24.182598681173587	24.24371263507396	24.073484656329164	24.04922657882952	24.092392288517285	24.11779055141545	24.118248428441554	24.014599530817556
Con_Pmod_vs_Con_Scr	O75949:Q7Z736:Q9H1K4:Q9H936	NALF2:PLEKHH3:SLC25A18:SLC25A22	0.024129169330741718	23.388052164916175	1.054994373479621	0.31538497944718386	0.779059	-5.3962	23.41869610216771	23.436207375917597	23.449948500232043	23.479187969962695	23.43254578162888	23.46550573471802	23.31204121256252	23.364000160759232	23.351069538430146	23.328165557064125	23.333297526151203	23.285960519399953
Con_Pmod_vs_Con_Scr	O75954	TSPAN9	-0.00303952	18.54738446918589	-0.0462677	0.9639757055037455	0.989486	-5.93293	18.38489854478319	18.383772704757455	18.549259178295166	18.48211729549883	18.386535134174068	18.44015944723757	18.661212494346405	18.764217575394863	18.486475416934905	18.647244502250427	18.692746370636147	18.689974965921635
Con_Pmod_vs_Con_Scr	O75955	FLOT1	0.00337013	20.31449576198432	0.11403218272145321	0.9113897230694339	0.9810535926780501	-5.92739	20.259036936048336	20.257907065743044	20.19442923494117	20.234010822150573	20.262238732650555	20.2252	20.399017786452195	20.355139315056793	20.449400947559916	20.37957395416587	20.347588120059847	20.410372169035305
Con_Pmod_vs_Con_Scr	O75964:A0A3B3ITX4	ATP5MG:NA	0.2430161753459643	26.731226939500687	3.187777474310715	0.0092709	0.40001201681270493	-2.42119	26.721763329486873	26.687329282715098	26.657	26.89459731845298	26.895473065132784	27.005051567211595	26.54602664229829	26.786042000766383	26.806392834919276	26.702597299400843	26.626138366011897	26.446330755054728
Con_Pmod_vs_Con_Scr	O75970	MPDZ	-0.00591341	22.501205102559105	-0.237268	0.8170705921991068	0.9633557429849848	-5.90536	22.460577568800883	22.48130934907035	22.4759	22.480967053950888	22.481883153527555	22.43721867744219	22.527980873131146	22.530372119990595	22.51204971958295	22.523876627832077	22.507852852702975	22.59445103768744
Con_Pmod_vs_Con_Scr	O75976	CPD	0.0542249	22.768634027592263	2.5335027791759086	0.028943013215268487	0.5084436347853483	-3.43183	22.73362457931385	22.745467186938853	22.763565911902155	22.79678171846078	22.799754409276712	22.808796211764633	22.818763890637708	22.786683590725225	22.753968696931537	22.723894742774053	22.76163469831174	22.730672694069906
Con_Pmod_vs_Con_Scr	O76003	GLRX3	0.00205938	22.49581132040204	0.0761859	0.9407209303090993	0.9873416866963577	-5.93106	22.46642983505744	22.522751926415392	22.513280648630676	22.55915723747765	22.46520511702244	22.48427819792199	22.49605040651145	22.51461253485113	22.516908091456763	22.456806099874605	22.463092409335516	22.49116334026942
Con_Pmod_vs_Con_Scr	O76021	RSL1D1	-0.0422636	19.054979554185607	-0.906419	0.3852894037402793	0.8232706972852815	-5.53143	19.13798780000784	19.09210659272151	19.00218405358989	19.020218912719137	19.06168354460146	19.02358510235275	19.090031682536058	18.987941443560352	19.16776384697783	19.03316878932015	18.98170034580598	19.061382536034326
Con_Pmod_vs_Con_Scr	O76024	WFS1	-0.0858608	22.782517080330393	-2.09247	0.0618879	0.5797047773540432	-4.09422	22.874694704060033	22.832836243619372	22.72921955917952	22.70528399971903	22.706312200047037	22.76757205329718	22.81511355181814	22.711460362257647	22.815500518375533	22.813389378829843	22.78160052698192	22.837221865779465
Con_Pmod_vs_Con_Scr	O76031	CLPX	0.011480532750280048	19.689582894527316	0.6272971626255237	0.5440271893597488	0.878934	-5.7371	19.736970664031908	19.726459342173285	19.754227774607187	19.760577749527116	19.740114057928555	19.751407571607537	19.62084427435955	19.607444851920224	19.61626609649848	19.654382729025883	19.67351151434439	19.63278810830369
Con_Pmod_vs_Con_Scr	O76039	CDKL5	0.0579562	14.794377737855823	0.7867564414935381	0.4490290094353868	0.8467399984018738	-5.6277	14.962673102243803	14.62317380394314	14.827560357185815	14.828716999057526	14.91432023234625	14.84423870679231	14.700945042863314	14.675156068816532	14.62014721910828	14.869614340156147	14.749796473071134	14.916190508685624
Con_Pmod_vs_Con_Scr	O76061	STC2	-0.189766	14.100450459682312	-1.4409	0.1791132345014657	0.7117868613415159	-4.97419	14.231838800488624	14.152596814804529	13.882398900486352	13.860876355347848	14.024358170809274	13.81230300191264	14.254998425480208	14.023441052704682	14.423370734258674	14.1666	13.970183227535756	14.40245069461456
Con_Pmod_vs_Con_Scr	O76062	TM7SF2	0.13702550830445404	16.188883928452377	1.1022148728490258	0.2952889630174631	0.7703469586964415	-5.3498	16.228910280979274	16.582923680522544	16.496786768312717	16.503557288092118	16.60337760233986	16.61276236429591	15.747142767456635	16.09444698084216	15.96051603952441	15.875301748547905	15.997108704592016	15.563772915922987
Con_Pmod_vs_Con_Scr	O76071	CIAO1	-0.0573718	18.15172780687181	-1.27139	0.23136291560907313	0.7387203027034835	-5.17107	18.27195041442417	18.26369452834202	18.224120960938706	18.26834449287963	18.084716908214173	18.23458899965122	18.007841029616092	18.02354877650081	18.109344068785056	18.136213645934543	18.116146110896587	18.08022374627873
Con_Pmod_vs_Con_Scr	O76074	PDE5A	-0.02678	16.749508680270907	-0.517203	0.615865	0.9071471488695353	-5.7993	16.741529536660586	16.74797504573047	16.85467438091343	16.74931106323436	16.72071669892053	16.793811286704983	16.660144106338183	16.77031363372151	16.598863387095427	16.799674331298817	16.85548657851123	16.70160411412136
Con_Pmod_vs_Con_Scr	O76080	ZFAND5	-0.0619464	10.569055339267383	-1.15495	0.2740260580862164	0.7534127119075787	-5.29613	10.590473931532028	10.522624078573628	10.502130130276054	10.516060420516126	10.438249751513553	10.475078750498248	10.768599055877182	10.71134174613979	10.67686924067601	10.510201373931151	10.440382241286562	10.676653350388252
Con_Pmod_vs_Con_Scr	O76081	RGS20	-0.064983	16.374221532431292	-2.05189	0.066298	0.5901679918617538	-4.15327	16.409328663660915	16.515919727779128	16.48626543251277	16.411836906661872	16.402370240730072	16.402357641482617	16.326630985645927	16.34025152329688	16.355116337401686	16.275553360360156	16.334316507648797	16.230711061994707
Con_Pmod_vs_Con_Scr	O76094	SRP72	-0.056512	22.462498839420995	-2.07305	0.0639625	0.5852942137345808	-4.12253	22.465456649804253	22.444374829526193	22.409600802972648	22.36704230904334	22.391836625886786	22.391017306788456	22.5747	22.486016747563557	22.580979734558017	22.47973937189812	22.49076967894884	22.468472396537837
Con_Pmod_vs_Con_Scr	O94760	DDAH1	-0.0275257	21.85821679815766	-0.885755	0.39582276370226166	0.827785	-5.54889	21.931647089546015	21.976454200002085	21.92448804224621	21.87201484034517	21.93518554798153	21.942811905595452	21.831495595325727	21.88088206960248	21.889754972262384	21.72912881688944	21.736304505675996	21.64843399241944
Con_Pmod_vs_Con_Scr	O94762	RECQL5	0.0336039	10.34156310751102	1.196034894869647	0.2583115634404668	0.7439648048457665	-5.25301	10.34816768081046	10.304560315759977	10.309565024893155	10.364768659619513	10.374066612117776	10.324269386481877	10.289590309362335	10.315584152480236	10.36977237682944	10.381558432375796	10.324141709309584	10.392712630092092
Con_Pmod_vs_Con_Scr	O94763	URI1	0.00880704	19.504887429519012	0.5011659573768832	0.6267203340541059	0.9092250255657002	-5.80742	19.479380028981833	19.486858062662744	19.501242645144007	19.493715067621824	19.496927490278747	19.503259286256803	19.492	19.509022734319235	19.47392946891881	19.540170393240405	19.55128441435443	19.530835554777894
Con_Pmod_vs_Con_Scr	O94766	B3GAT3	-0.00203253	21.7548	-0.0609445	0.9525618809896921	0.9877182362068813	-5.93213	21.817305159676152	21.78311639773801	21.73948968552843	21.748044814179178	21.82656821138518	21.75920063545051	21.776235239002258	21.71397192500715	21.82206155200171	21.696050148972137	21.664917612317264	21.71036133163282
Con_Pmod_vs_Con_Scr	O94768	STK17B	0.0639677	14.970760595053287	1.3139763603695522	0.21717500636658044	0.7328496892578961	-5.12319	14.985277945030456	15.12393555683693	15.008887670268589	15.1389	15.106473784822578	15.064661835539052	14.813096741187016	14.84081169720163	14.814988214874798	14.877506396303495	14.84635235122206	15.02826633398774
Con_Pmod_vs_Con_Scr	O94776	MTA2	0.031035678615189966	17.24415689244079	1.0627509336035168	0.3120145876770924	0.7758083695949878	-5.38869	17.176155032569167	17.22174925126736	17.27484464704532	17.277251710083725	17.2491	17.23949420286638	17.228879340625866	17.26478940597931	17.22253435530132	17.252757497184007	17.298894381484338	17.223422831105427
Con_Pmod_vs_Con_Scr	O94788:P30837	ALDH1A2:ALDH1B1	0.0391614	27.424798902117764	0.7880688249552217	0.4482941994191164	0.8467399984018738	-5.62671	27.412534459522913	27.467044453550905	27.525940032512544	27.459900977977675	27.530183948742113	27.532918283635865	27.240515529418705	27.29945892630299	27.189692096211257	27.487583200853457	27.57271874315781	27.379096173526925
Con_Pmod_vs_Con_Scr	O94804	STK10	-0.0209635	25.06982850059532	-0.914068	0.3814405507460369	0.822423	-5.52488	25.08705722034964	25.10249693782116	25.063681927090755	25.071164494156537	25.074831625088645	25.04434935248521	25.046846467561956	25.038590228156085	25.0761	25.072116263897897	25.046024063636835	25.11472250563314
Con_Pmod_vs_Con_Scr	O94808	GFPT2	0.00570463	20.765739546767385	0.11125727480474032	0.9135361519710271	0.9812852589387964	-5.92771	20.877264139299015	20.93824374227904	21.019163993258104	21.005034861906847	20.890574449713256	20.956176442818204	20.601324091061265	20.72367210887909	20.648429017402727	20.526652742371446	20.58	20.422321774340208
Con_Pmod_vs_Con_Scr	O94817	ATG12	-0.0478929	16.46930801802514	-1.17249	0.2672283205791186	0.7470827452808014	-5.27786	16.523440255179004	16.483458304432652	16.417361815097852	16.45384771868411	16.333188965219303	16.493545079977817	16.48223092389394	16.435862827533057	16.448074166484872	16.520964992487656	16.493157238927534	16.546563928383886
Con_Pmod_vs_Con_Scr	O94822	LTN1	-0.0125815	20.944563574096883	-0.6919	0.5041953398379034	0.8605521265437722	-5.69546	20.92176546820156	20.968586855917344	20.930251974955524	20.91931996893937	20.930886490173403	20.932653439679463	20.952203543334917	20.96223330993775	20.95914411104799	20.95003411333026	20.95871681718509	20.94896679645994
Con_Pmod_vs_Con_Scr	O94826	TOMM70	-0.0222545	21.761251492902048	-0.865304	0.4064426663549784	0.830413	-5.56582	21.86376220514144	21.839669913454507	21.8204	21.849059106900057	21.797732789246567	21.81027851036833	21.673248487575417	21.645442114736586	21.72866874223191	21.707918488659445	21.68222587183419	21.71660982508341
Con_Pmod_vs_Con_Scr	O94827	PLEKHG5	0.052774	12.269334828002293	0.5545417697365037	0.5909655719696212	0.8977210863619572	-5.77946	12.216516028948226	11.98568015676296	12.184670375652717	12.403632881342215	11.967269245532266	12.174286427976412	12.416350568308255	12.401271779690312	12.420954635928714	12.356408080787595	12.280387048728668	12.424590706369187
Con_Pmod_vs_Con_Scr	O94829	IPO13	0.0630833	21.036702698261788	0.6414590622391623	0.5351432574675585	0.8749702499707683	-5.72829	20.75588054252205	20.847324082284217	21.026438917621483	21.122110897278148	20.969729271857133	20.72705330623343	21.06758874076893	21.205360847021232	21.304427370901596	21.12625562892084	21.12192923225635	21.166333541476032
Con_Pmod_vs_Con_Scr	O94830	DDHD2	-0.0768282	20.99145469494805	-2.37592	0.0380459	0.5358613997467039	-3.67201	21.018437740148187	21.08653301185479	21.069996220640867	21.0105	20.97485139292865	20.95909076403588	20.965217959250396	20.907004583745692	20.879601625993132	20.96392089773031	21.00084304347586	21.061418940290647
Con_Pmod_vs_Con_Scr	O94832:B0I1T2	MYO1D:MYO1G	-0.0461044	23.496569122072135	-1.22318	0.24832617109192834	0.7435648622388488	-5.22391	23.45137467506619	23.472435545676824	23.35577374047109	23.29826996146875	23.410994358400817	23.432006490851737	23.56389003820002	23.545764236015167	23.553472730656846	23.63573572412116	23.6203	23.618766462334097
Con_Pmod_vs_Con_Scr	O94855	SEC24D	-0.0569746	23.31360856012887	-2.05797	0.0656189	0.5896448140711641	-4.14445	23.35997761425057	23.381874469408217	23.319804643354097	23.264019419170303	23.28569797187184	23.341015610634457	23.3863	23.333723386169716	23.35616822410964	23.24485514605031	23.27421315946953	23.21567476502655
Con_Pmod_vs_Con_Scr	O94864	SUPT7L	-0.0444378	14.943908839972002	-1.40232	0.1900360466112984	0.7191943873430676	-5.02045	14.980830042062296	14.951804067035496	14.885380313731398	14.869087299332593	14.902849967647091	14.912763884978608	15.023197464144625	14.953188913407772	14.989524179235502	14.944357018075385	14.914875293824016	14.999047636189244
Con_Pmod_vs_Con_Scr	O94868	FCHSD2	-0.0607048	12.746751739923038	-1.26504	0.2335422433431439	0.7387203027034835	-5.17812	12.793984625747024	12.777152588022869	12.64132811893963	12.614520145734035	12.71212245780033	12.703708423775648	12.868407894698455	12.744806846924412	12.876565005362398	12.743035590573603	12.716482432499184	12.768906748998877
Con_Pmod_vs_Con_Scr	O94874	UFL1	-0.00686038	22.702102507912244	-0.25589	0.8030397088237555	0.9600667644268963	-5.9007	22.74158713289023	22.760074857372175	22.779297069654756	22.751601266883178	22.738842180839217	22.769934464664207	22.629937638097974	22.627134897636747	22.630313225537865	22.672094249110003	22.71800244877813	22.60641066348246
Con_Pmod_vs_Con_Scr	O94876	TMCC1	0.0470681	16.995017444632335	1.9431278159344874	0.0796238	0.6146169983214856	-4.30932	16.92840411412994	16.94057605597172	16.940963179537828	16.972139440379312	16.968524686016224	17.01048348844871	16.963648260649105	17.031478995940223	16.945428024803157	17.08737072465555	17.080843624355236	17.070348740701036
Con_Pmod_vs_Con_Scr	O94880	PHF14	-0.0269261	13.155061008901253	-0.754627	0.46726237238854795	0.8479055457704144	-5.65152	13.108694496556485	13.135399807910712	13.194966136559112	13.126958267235498	13.100683413810806	13.130640313303743	13.17104150986922	13.213226772608516	13.173046185492618	13.178823218810903	13.235736638369357	13.091515346288055
Con_Pmod_vs_Con_Scr	O94885	SASH1	0.0344942	18.691689069462537	0.7360718566378948	0.4780050419223758	0.8506867547580212	-5.66487	18.660755332978862	18.529479050176658	18.60668109557476	18.686771176708216	18.554299303057093	18.65932771906168	18.81650113806739	18.79989860882064	18.722731631067884	18.746441900195556	18.7	18.817378111482213
Con_Pmod_vs_Con_Scr	O94886	TMEM63A	0.055257657909123736	22.97415283665972	0.5701975792220481	0.5806856809416652	0.8936092654361437	-5.77076	22.858408224920986	23.094902470588902	23.04963770770029	23.010252030624752	23.06350247615207	23.09496687016071	22.850545219147353	23.039750461762992	23.012044000655315	22.922767483199937	23.04959873290336	22.643458362099953
Con_Pmod_vs_Con_Scr	O94887	FARP2	0.0935573	18.329862425370923	2.392066020076971	0.0369973	0.5358613997467039	-3.64754	18.344207140395685	18.332500956134055	18.439398782801387	18.52446167890285	18.459936019495817	18.41238122421674	18.205845183148583	18.28761476721032	18.300691462267608	18.23375889801883	18.23335404279822	18.18419894906097
Con_Pmod_vs_Con_Scr	O94888	UBXN7	-0.0630061	19.846801479990127	-1.45434	0.17543828908290887	0.7098418705330428	-4.9579	19.85497287537197	19.803143837024447	19.819149145411533	19.720233069016615	19.740248548904248	19.827765807040844	19.95919577520362	19.836334350421843	19.818441630981727	19.91655970198853	19.985918527871853	19.879654490644302
Con_Pmod_vs_Con_Scr	O94900:Q96NM4:O15405:O94842	TOX:TOX2:TOX3:TOX4	0.0659853	16.933909203072975	2.1812326781740325	0.0531944	0.5630636225681003	-3.96372	16.887605046028387	16.893315542117676	16.966249400496338	16.9938	16.966702984489974	16.984618532796667	16.888950521519035	16.944546983000535	16.842760592361646	16.943317644925294	16.97118231327734	16.92385648363682
Con_Pmod_vs_Con_Scr	O94901	SUN1	0.00416655	16.942926470583622	0.1474284908989738	0.8856206683742118	0.9760192068290906	-5.92294	16.927119302902767	17.031033797023927	16.9508	16.970275690948426	16.99452355156603	16.956698763552144	16.915263894863767	16.941772217036316	16.979161028976577	16.879692214988737	16.884803284201805	16.883928650989784
Con_Pmod_vs_Con_Scr	O94903	PLPBP	7.467977390263059e-6	18.96509276738472	3.63016358070527e-4	0.9997172429509452	0.9997616632036164	-5.93402	18.962870711359702	18.922365791387517	18.93112138082622	18.947844764079797	18.93598740690893	18.93254811651689	18.99287102976098	19.01562826221559	19.031008521647827	18.98154556290297	18.942301090821495	18.985020570188748
Con_Pmod_vs_Con_Scr	O94905	ERLIN2	0.0123488	23.75551414331623	0.4966053391482635	0.6298245671156806	0.9097110057858723	-5.80969	23.75976676315769	23.74549882618303	23.76669587883462	23.794894457220614	23.787928328042323	23.7262	23.69734056538861	23.68829310591324	23.732737269396303	23.78363204021707	23.76248658590446	23.82071075017739
Con_Pmod_vs_Con_Scr	O94906	PRPF6	0.018013891360716627	18.281017125673955	0.6891088862774909	0.5058789325527879	0.8605521265437722	-5.69734	18.224903622778527	18.215387426430496	18.24695089483547	18.219374474592662	18.254583305548735	18.26732583798525	18.327292380467387	18.296892516977422	18.258520177290887	18.348827121854047	18.393340652223603	18.31880709710297
Con_Pmod_vs_Con_Scr	O94913	PCF11	0.0095494	12.984919060741527	0.31236810427455264	0.7609511398758889	0.9484738272581473	-5.88446	12.926210727310322	12.928671722431575	12.985521760665437	12.93812410520363	12.966810112950956	12.964118199104492	13.091757264768331	13.058127488729545	12.992708319089296	12.972329266074007	13.033452702156632	12.961197060414094
Con_Pmod_vs_Con_Scr	O94915	FRYL	0.013759021341471112	21.002680930733742	0.6559641292615791	0.5261318641531059	0.8700616917310303	-5.71908	20.875678149214885	20.90311137041179	20.92936359103459	20.942915020965156	20.906829829057777	20.899685324662737	21.07782987294009	21.10833935009723	21.079995632048547	21.09633494133348	21.107078783582896	21.10500930345572
Con_Pmod_vs_Con_Scr	O94916	NFAT5	-0.0427896	16.031689521465882	-0.867629	0.40522578314364566	0.8297463241471191	-5.56392	15.911478858295418	16.00204974475345	15.952121837224809	15.846449321943272	15.947864221006624	15.94296802433723	16.126496603754727	16.164419877587203	16.1863	16.12629612591067	16.18849018015414	15.985354702197244
Con_Pmod_vs_Con_Scr	O94919	ENDOD1	-0.00817521	21.885216192723867	-0.439948	0.6690020535628542	0.9238497099653658	-5.83618	21.89293966059376	21.894960241172765	21.90173961342528	21.878692653434115	21.88953912378629	21.896882104832763	21.874017263537738	21.84114630291645	21.833260500582607	21.898758486409335	21.92538664174149	21.895271720253813
Con_Pmod_vs_Con_Scr	O94923	GLCE	-0.0431912	14.22377341495041	-1.57484	0.14528	0.694261	-4.80762	14.330021670134505	14.31956968353587	14.31920329100467	14.261469980955416	14.339261005666687	14.2385	14.164946180431423	14.156786559743493	14.19950626759413	14.118019829596737	14.093176559313276	14.144829820077913
Con_Pmod_vs_Con_Scr	O94925	GLS	-0.0653635	30.885097734940604	-1.3329	0.21110399279157085	0.7293819180839909	-5.10156	31.1107	31.011917145823844	31.06248908311111	30.95868197026325	30.940344502585965	31.090037672382365	30.714352353626683	30.67898471917231	30.61676994737706	30.83326494026945	30.87238304690579	30.73119912236251
Con_Pmod_vs_Con_Scr	O94927	HAUS5	-0.0508526	12.318678870336091	-0.734402	0.4789792267038071	0.8506867547580212	-5.66606	12.166675791375276	12.324039779876214	12.356643679148268	12.200091344938592	12.331096796997548	12.163613456602688	12.40591526585996	12.349111356990973	12.43250684668006	12.345292117791097	12.498172870480708	12.25098713729172
Con_Pmod_vs_Con_Scr	O94929	ABLIM3	0.10493802242153905	20.85294698059346	1.6925258333784508	0.12032576799956014	0.6671353408175047	-4.65423	20.86224573703431	20.560598472193465	20.754680712023028	20.841148495194105	20.81552086286152	20.835669630459797	20.951192346114116	20.85355723333604	20.85367788313182	20.98207518200676	20.92780742461276	20.99718978815381
Con_Pmod_vs_Con_Scr	O94952	FBXO21	0.0473256	16.91692004230624	0.5961212242786866	0.5638779792437167	0.8865401293506525	-5.75584	16.725868979924606	16.766133346982024	16.804116682849173	16.812771429726876	16.887689596429293	16.737634653760544	17.091972191281084	17.11636170011785	16.898468184190715	16.979485510332538	16.944287269038348	17.238250963041846
Con_Pmod_vs_Con_Scr	O94953	KDM4B	0.0106409	13.026384155566827	0.22000295550683224	0.8301390914688969	0.9661827085635295	-5.90937	12.973139420485722	13.08974900842428	12.93164789130626	13.018694150811344	12.921077215401793	13.086687566188754	12.935846935406214	13.032436747441029	12.96439708466399	13.129870659155577	13.102988615691189	13.13007457182578
Con_Pmod_vs_Con_Scr	O94966	USP19	-0.0130983	14.29973532820447	-0.564521	0.5844021426080559	0.8953514156142587	-5.77394	14.236918188484353	14.22306650201362	14.209763769215376	14.244351999832205	14.170273615407597	14.215827872038275	14.435777334615578	14.44589758344303	14.481687876720668	14.319892805189138	14.295509065229734	14.317857326264056
Con_Pmod_vs_Con_Scr	O94967	WDR47	0.020879421811070387	22.061076073870264	0.6278537333417115	0.5436764582512321	0.8787314430930349	-5.73675	22.06825217967605	22.11215661111865	22.118634114044475	22.159531773073837	22.134889806692907	22.067259590505635	21.95794721281063	22.01348503190047	21.988315868980393	22.022546309266637	21.99216993651699	22.09772445185651
Con_Pmod_vs_Con_Scr	O94973	AP2A2	0.013236494372282692	22.88302367512348	0.7419101932107223	0.47460829074973876	0.8506867547580212	-5.6607	22.88863179781347	22.877112731379697	22.895195788246298	22.904886930166803	22.88341022633775	22.912352644051744	22.81476374370111	22.82379821350796	22.810847180145245	22.93391975820092	22.9417	22.90963999170135
Con_Pmod_vs_Con_Scr	O94979	SEC31A	-0.0382544	26.1666	-1.41647	0.18596598027643446	0.7166493874067474	-5.00358	26.20337635347049	26.206218759826797	26.134914759890727	26.13678683910731	26.13996687149973	26.15299296452065	26.201495524860068	26.198402344753788	26.273407404644537	26.132456507069868	26.09736730429595	26.122364625084465
Con_Pmod_vs_Con_Scr	O94985	CLSTN1	0.0171167	18.166697652726228	0.681149	0.5106991309825517	0.8619003566198508	-5.70265	18.135124422040636	18.17652291603849	18.128811163309948	18.182633547352292	18.129418783889857	18.1798	18.269329148041656	18.204391720165283	18.223110641543464	18.10163878000057	18.13056495972031	18.139069479544336
Con_Pmod_vs_Con_Scr	O94988	FAM13A	-0.0709348	11.28131120699802	-1.65695	0.1274329286730959	0.6686702013769092	-4.70124	11.246392631317171	11.30578919119646	11.26908694220461	11.254242140022122	11.145858194415172	11.208363983712646	11.38018919513392	11.340715410591184	11.26632146482719	11.271597614087176	11.28455768185313	11.402620034615447
Con_Pmod_vs_Con_Scr	O94992	HEXIM1	0.022366442910016104	16.775264344871623	0.9125853101021495	0.38218466531605955	0.822423	-5.52616	16.794873849894117	16.744674216440462	16.79548397145763	16.80883571964387	16.789001882644907	16.80429376423349	16.747178296866288	16.76708713491178	16.696679602962302	16.781550927979424	16.763400692972024	16.810112078453166
Con_Pmod_vs_Con_Scr	O95069	KCNK2	-0.0713499	13.180768079549253	-0.973707	0.3523655356158084	0.8045340264060366	-5.47227	13.35316488811912	13.260215658085176	13.122566154114535	13.151767031399606	13.215824084383804	13.154305786453977	13.22928381436755	13.071220959229294	13.326327257307891	13.10148311387143	12.999149497389274	13.18390870986937
Con_Pmod_vs_Con_Scr	O95070	YIF1A	-0.0809411	24.307859846892562	-1.03879	0.3225138577161226	0.7807536698541477	-5.41175	24.5401	24.35976603879783	24.23461802036422	24.214415114448432	24.313074636289013	24.36421823959094	24.42596921348344	24.22624373212645	24.391693903138147	24.222199375500175	24.13438125866652	24.267591312197467
Con_Pmod_vs_Con_Scr	O95071	UBR5	0.00351777	16.823884078319036	0.21072368051512613	0.8371857238823005	0.9669323985043351	-5.9114	16.81873023783876	16.810210151170196	16.82569159068234	16.821652340368395	16.830630348578918	16.812902615050106	16.814200610485948	16.791871115152745	16.809552134162143	16.84768111169865	16.858260132514356	16.845226552125894
Con_Pmod_vs_Con_Scr	O95081	AGFG2	0.0669189	12.140386802760755	1.393534066825192	0.19260036415647272	0.721058	-5.03087	12.224322468943182	12.12906031139935	12.089657072110514	12.20895430333906	12.222739236031204	12.2121	12.024216059244791	12.046828280874806	12.197699923706434	12.160370744420929	12.063676186391277	12.105013964727211
Con_Pmod_vs_Con_Scr	O95084	PRSS23	-0.0294747	15.28211532944015	-0.416688	0.6853996876142222	0.9269120979652602	-5.84616	15.385274603464042	15.571802413123308	15.318318810336285	15.414668543421543	15.421974605789377	15.350328441359606	15.135072172174333	15.101682378347435	15.234166943051166	15.115276359095056	15.056253905693293	15.280564777426369
Con_Pmod_vs_Con_Scr	O95104	SCAF4	0.026641758344197797	15.508893435388993	0.9495970457934407	0.3639205535176432	0.8123235581476965	-5.49387	15.490488751962271	15.448431347980817	15.54048892895991	15.55713878657432	15.489021850212614	15.513173667148646	15.540226775892489	15.579645004685748	15.520454781931852	15.478091870976025	15.481995023071514	15.467564435271717
Con_Pmod_vs_Con_Scr	O95139	NDUFB6	0.12884644783770582	20.005864297293495	2.5150647591063784	0.0298861	0.5120248184846236	-3.46007	20.045423053740556	19.87791664447217	19.870541828308575	20.013858866955268	20.020967991715892	20.145594011363247	19.995197467126054	19.981062881778097	20.029093442590053	20.084871566211728	20.024183774508103	19.981660038752185
Con_Pmod_vs_Con_Scr	O95140	MFN2	-0.0406102	22.83049858238266	-0.788052	0.44830343851459664	0.8467399984018738	-5.62672	22.930128930505813	22.99511191540371	22.828014067038858	22.87312507214078	22.907124827650716	22.851174338716525	22.776584092873684	22.739690162373776	22.888265209021352	22.72224774879312	22.657039362156805	22.797477261916768
Con_Pmod_vs_Con_Scr	O95155	UBE4B	0.0269955	19.920125729988577	0.962684	0.35761467065853125	0.8067234998194779	-5.4822	19.878649757957845	19.900550597059297	19.939758238716077	19.979672633949157	19.90914644179673	19.911125912745067	19.901523688943616	19.95673051632475	19.89571874792988	19.912359435090483	19.906090684480727	19.9502
Con_Pmod_vs_Con_Scr	O95159	ZFPL1	-0.0220991	16.53700795965684	-0.791294	0.4464919919921865	0.8462809543229743	-5.62426	16.507440729689034	16.579211724421896	16.53900701434139	16.558739468744513	16.49078697493218	16.50983568534122	16.546663057406683	16.607601477072937	16.62464272145995	16.498271721823965	16.48913527950331	16.492759661144998
Con_Pmod_vs_Con_Scr	O95163	ELP1	-0.0547146	19.894568952999965	-2.44677	0.0336503	0.5307865960767675	-3.56439	19.982729665478292	19.992089644669747	19.935667063797567	19.908669442249476	19.906405703706184	19.931267533239083	19.88329574687463	19.84737824113465	19.862121121474097	19.81977630091457	19.809000089806545	19.856426882654727
Con_Pmod_vs_Con_Scr	O95164	UBL3	0.032768534141364825	14.220196006146278	1.17014	0.26813080036021325	0.7470827452808014	-5.28032	14.21828142771889	14.23555586420182	14.23348381072168	14.262714668805792	14.311690368863276	14.2112	14.192127280176006	14.171131994569503	14.247062274568997	14.182436669753612	14.178534515461614	14.198111531516744
Con_Pmod_vs_Con_Scr	O95166	GABARAP	-3.32602e-05	17.124074238580366	-0.00103087	0.9991970487114475	0.999619	-5.93402	17.046018734530872	17.071568688612544	17.016735212187367	17.043306977799226	17.03989855157269	17.051017325454847	17.181143637999362	17.22999730697791	17.309546811892712	17.197919509985145	17.17392014191439	17.127817964037334
Con_Pmod_vs_Con_Scr	O95167	NDUFA3	0.22252027990866097	22.29355549257824	2.353681674016121	0.0395377	0.5358613997467039	-3.70565	22.217694640953543	22.30108647633233	22.25702531129844	22.4733	22.47690175622343	22.493186915359672	22.031985849154335	22.408285431620328	22.418298166692985	22.26554986085836	22.17352612628069	22.00584677943754
Con_Pmod_vs_Con_Scr	O95168	NDUFB4	0.019263185574502018	23.96363783850238	0.7728377735278142	0.4568704127967479	0.8479055457704144	-5.63812	23.991279224359733	23.94721381849789	23.96397502113568	23.9739	23.96977698391546	24.016615756096563	23.955807530185375	23.986982059559367	23.987306821263353	23.950510633783292	23.94102187023608	23.879299462290977
Con_Pmod_vs_Con_Scr	O95171:Q8WUH6	SCEL:TMEM263	0.00688184	22.936404175729766	0.1774367594899071	0.8625830682012536	0.9711828257317372	-5.91797	22.856002355582586	22.944187778774637	22.937835655072796	22.946475640396997	22.91683461468121	22.895361047965817	22.961394671352284	23.02571043064302	23.08000227233036	22.90736638749281	22.938110476997263	22.827568777467423
Con_Pmod_vs_Con_Scr	O95182	NDUFA7	-0.0266962	21.67231408610396	-0.899737	0.38867368637619215	0.8239325909763644	-5.53711	21.6615	21.69289660180671	21.695000935908237	21.662367894813215	21.65573950172378	21.65119242743508	21.63155335599133	21.70530858471029	21.72985411567969	21.686513295946884	21.68675709447605	21.609094337010728
Con_Pmod_vs_Con_Scr	O95183	VAMP5	0.14118511333441752	15.611988288381722	1.4086320690510696	0.1882112079125472	0.7184815536864524	-5.01294	15.394893050091095	15.50326764808498	15.583006921888195	15.639815345277324	15.582013004478345	15.682894610311852	15.50607485737483	15.869382903699696	15.701461690181718	15.713925490282463	15.745097484345749	15.42202645456442
Con_Pmod_vs_Con_Scr	O95197	RTN3	-0.00855604	19.833122769565684	-0.283584	0.78231	0.9552746233869726	-5.89313	19.90725030439839	19.838783144574748	19.90307312183145	19.893825365617307	19.893928196267098	19.835684878188765	19.703414548848514	19.758813201271614	19.74931310084833	19.849742048830713	19.791179922085593	19.8725
Con_Pmod_vs_Con_Scr	O95202	LETM1	-0.0195206	23.025634305573263	-0.808778	0.4368030418305413	0.839952	-5.61087	23.155955941422818	23.14752875536323	23.115933344093072	23.099514263183448	23.14061280969432	23.12072904418068	22.876757842255905	22.85282335319384	22.928771496521836	22.969770644514018	22.962954380972473	22.93625979148352
Con_Pmod_vs_Con_Scr	O95208	EPN2	-0.0129137	16.547053276446825	-0.427146	0.6780056166043251	0.9250853836224816	-5.84174	16.578988805546654	16.60910381982701	16.55420288662507	16.53366439303428	16.631018328225675	16.538871688597638	16.529959580250285	16.49197126743112	16.545998520061364	16.507	16.49607259247024	16.547768518785553
Con_Pmod_vs_Con_Scr	O95210	STBD1	-0.0293796	24.22565651354754	-0.686971	0.5071706218499945	0.8605521265437722	-5.69877	24.4781	24.463451560686877	24.435362219902583	24.395337635907197	24.51169529282806	24.381736572202733	23.920700120543476	23.782484150717128	23.91149885596516	24.121270998251575	24.130757305442167	24.175488837570764
Con_Pmod_vs_Con_Scr	O95219	SNX4	-0.0174663	22.19538254462119	-0.774978	0.4556586705628831	0.8479055457704144	-5.63653	22.1907	22.24265524631897	22.22524499910652	22.187690581929058	22.20312216159454	22.215430792015212	22.168176325110377	22.202250470977305	22.13569537896089	22.184765422727125	22.203292365282692	22.185524584690786
Con_Pmod_vs_Con_Scr	O95232	LUC7L3	0.00618551	18.108957116795004	0.350218	0.7331840496733282	0.938396	-5.8718	18.121708990887697	18.098894099534046	18.115413259332097	18.115241500639527	18.123960628418732	18.11537075419006	18.08721167472944	18.076410198391127	18.10473606423002	18.12361255911596	18.12567554203375	18.0993
Con_Pmod_vs_Con_Scr	O95239	KIF4A	-0.0541537	8.530515051594538	-0.505208	0.6239750898487468	0.9092250255657002	-5.8054	8.654891631542691	8.490821944274789	8.293672867317522	8.298941686805492	8.482923456297975	8.495060216605253	8.709803559898692	8.376883261992795	8.5419	8.643235839310094	8.569299994172734	8.808747763812672
Con_Pmod_vs_Con_Scr	O95248	SBF1	0.00553331	19.335698401763075	0.23356764425251778	0.8198665270123744	0.9641259131817801	-5.90625	19.268352172477087	19.314158664273982	19.32931329555343	19.31853613867728	19.33043454965262	19.27945338606787	19.373315629777128	19.4196	19.378711694829427	19.329842936251424	19.333191981050337	19.353431051100316
Con_Pmod_vs_Con_Scr	O95251	KAT7	-0.0357979	13.755240287345309	-1.58993	0.14184238868536692	0.6898080598857448	-4.78829	13.70285604478105	13.713329498982173	13.718508925219702	13.6776	13.6588	13.690916458440856	13.838517342771564	13.782500788927628	13.784012524437866	13.818927323854387	13.863583980599063	13.813346383484216
Con_Pmod_vs_Con_Scr	O95260	ATE1	-0.0407851	18.68149128517277	-0.435086	0.6724151289747793	0.9245835873384326	-5.83831	18.80996516803348	18.677668495951888	18.73461198619629	18.693668617623636	18.662557924804243	18.74366366940006	18.718171247267325	18.58338311645434	18.341471121811967	18.659419101874462	18.637314693868458	18.916000278787088
Con_Pmod_vs_Con_Scr	O95273	CCNDBP1	-0.0576042	25.64011348709465	-0.605686	0.5577451927214973	0.8856345150232102	-5.75019	25.788446771274327	25.730268772405836	25.58458855653123	25.68380164468836	25.68043869232919	25.566251195080937	25.64879864984208	25.632239305503887	25.79596078993779	25.518369759420057	25.31428437498989	25.737913333132212
Con_Pmod_vs_Con_Scr	O95292	VAPB	-0.00755635	22.380398081965456	-0.312606	0.7607758010448142	0.9484738272581473	-5.88438	22.469275669422917	22.42562514351063	22.406983377692697	22.39833755624948	22.43901558572038	22.44186199192735	22.26991806793792	22.277693055711776	22.31724793393215	22.396614892870552	22.365893949120633	22.356309759489008
Con_Pmod_vs_Con_Scr	O95295	SNAPIN	0.035439457957160414	20.624646157413054	0.7860033563237001	0.44945102024875827	0.8467399984018738	-5.62827	20.62658054680235	20.67130305386729	20.626941002423266	20.69395187314569	20.669673456587734	20.667517647230973	20.52417762778944	20.70377911648006	20.714913585278953	20.578627560107705	20.504205314577625	20.51408310466554
Con_Pmod_vs_Con_Scr	O95297	MPZL1	0.0374847	23.198785209308028	1.0807551077810815	0.3042967313895748	0.7730168875288558	-5.37109	23.274693228916504	23.324332960082884	23.355713562565004	23.372953333380536	23.370680802646262	23.323559847355188	22.94140512483754	23.08188355157772	23.01012198544851	23.12239939623406	23.099442272234956	23.108236446417177
Con_Pmod_vs_Con_Scr	O95298:E9PQ53	NDUFC2:NDUFC2-KCTD14	0.0163042	22.363606340443333	0.4924208453730725	0.6326794198279286	0.911705	-5.81175	22.38962533434319	22.377807811882793	22.32290000820077	22.33934079858142	22.37285305929984	22.42705204441217	22.337577608590543	22.393327111861588	22.411459014636005	22.369337802285873	22.34000330971152	22.281992181514273
Con_Pmod_vs_Con_Scr	O95299	NDUFA10	-0.0773627	23.456698713744952	-2.22518	0.049335	0.5515277266942814	-3.89847	23.524101920593104	23.482517887846285	23.449383890304404	23.373068824319635	23.39682180451027	23.454024865215484	23.5292	23.40514528142604	23.452528545838703	23.463930390186263	23.49640262417149	23.45322830887924
Con_Pmod_vs_Con_Scr	O95302:Q75LS8	FKBP9:FKBP9P1	0.020837	24.224585939225246	0.7901929362565481	0.4471065641499721	0.8467399984018738	-5.6251	24.244195573038382	24.21443265953545	24.25312895150188	24.248133363566573	24.26979086665808	24.256343884640813	24.171120266295965	24.109935902937597	24.162864470805793	24.257670422375533	24.297627493367383	24.2098
Con_Pmod_vs_Con_Scr	O95319	CELF2	0.019059872150258172	17.299678931090398	0.4293676344331588	0.6764390913669827	0.9245835873384326	-5.84078	17.615593414561626	17.755906489596242	17.68424678739496	17.64662941348986	17.798727762095684	17.667569132418055	16.846251121849367	16.896255652625257	16.908616763877998	16.923754745976407	16.95226009753751	16.900335791661824
Con_Pmod_vs_Con_Scr	O95336	PGLS	0.0583284	24.910244947728877	1.3008436093854174	0.22147172309907465	0.7354576507643895	-5.13807	24.824451334272094	24.867911097986344	24.798574013314965	24.871179669079353	24.877944979779112	24.916796986416003	24.917955056503303	25.081698519966388	25.08553849376519	24.947695587252415	24.891466132121852	24.8417
Con_Pmod_vs_Con_Scr	O95340	PAPSS2	-0.067657	24.428608614368322	-0.60644	0.5572636316590882	0.8853954013622608	-5.74974	24.513562832871447	24.510646621434457	24.28132785426589	24.396978759511935	24.439243755532697	24.2663	24.445999757538853	24.35099549074522	24.636840793324694	24.41711613510623	24.223739469016788	24.660508257733248
Con_Pmod_vs_Con_Scr	O95347	SMC2	-0.0155066	14.246151380614759	-0.869963	0.4040061355399238	0.8296090302348127	-5.562	14.199883521809516	14.195519584337934	14.207176969980024	14.19258645282864	14.184855770825305	14.178617952645936	14.328932868862136	14.321493863968584	14.300515623192098	14.271639866594253	14.270277526184072	14.302316566148606
Con_Pmod_vs_Con_Scr	O95352	ATG7	0.010927890048286315	17.759419052711046	0.39521562034273067	0.7006908410179244	0.9313927082650366	-5.85491	17.655652311315432	17.60995779329458	17.689359793672725	17.718393506871365	17.636083227350102	17.633276834206125	17.781009669849198	17.765523583095714	17.790978162665994	17.940531946726527	17.944227105054882	17.948034698429908
Con_Pmod_vs_Con_Scr	O95359	TACC2	0.0879685	12.685177169592613	1.134139483094136	0.2822705175561346	0.7610706787349704	-5.31754	12.490576738767118	12.41379720126779	12.653417110795411	12.745532443009198	12.4995	12.576707363124024	12.969087239833575	12.855308663993014	12.7586	12.692225961262874	12.799519772139067	12.76793775062398
Con_Pmod_vs_Con_Scr	O95363	FARS2	0.0386387	18.45835896310152	1.6044375015343806	0.1386065362352733	0.6853321066323252	-4.76962	18.434221354720005	18.41636731810498	18.426021255063674	18.43794130174687	18.45866308643466	18.495921529957755	18.46228184280487	18.432725593825815	18.414043200508633	18.50967838926396	18.539840542930037	18.472602141856974
Con_Pmod_vs_Con_Scr	O95365	ZBTB7A	0.18029690148540922	16.92323208931223	3.5836820263954494	0.00470305	0.35955570409741777	-1.81732	16.815167631424075	16.8043	16.921912505774383	17.114304294696822	16.922322597685632	17.045650801272732	16.865484127863468	16.899618746503855	16.81909584072215	16.952613297397065	17.009262756457044	16.90904561994903
Con_Pmod_vs_Con_Scr	O95372	LYPLA2	0.043942	23.80855011063028	0.9618845807054961	0.3579977769264213	0.8067234998194779	-5.48292	23.821687773664884	23.864765376143133	23.82284318365508	23.903719296139545	23.83033478068424	23.907068366241234	23.755801848347375	23.89599064740031	23.924905829508592	23.708180420984768	23.676957066936147	23.59034673785804
Con_Pmod_vs_Con_Scr	O95373	IPO7	-0.0326135	19.462975974993874	-1.01998	0.3309408997491017	0.7880879403737766	-5.42957	19.545244356083987	19.503359979919267	19.46104912254011	19.46636145381361	19.479918017561335	19.46553360025448	19.407381970803613	19.345440945791815	19.396193435724637	19.486103257227583	19.44368178826621	19.55544377193984
Con_Pmod_vs_Con_Scr	O95376	ARIH2	0.00395294	18.924347219399024	0.10441308868392989	0.9188332882978987	0.9825557355102871	-5.92846	18.879553285277385	18.84645360831953	18.981542278053254	18.971	18.869766712520963	18.87863099223985	18.917003384962484	18.94913739569708	18.8963	18.9625	18.99196858165159	18.948356853143657
Con_Pmod_vs_Con_Scr	O95379	TNFAIP8	0.11349665850669943	15.089316577888628	0.9786659071095728	0.35002206502580224	0.802275	-5.46777	15.004921454617383	15.26447362750686	15.41245705561307	15.52617044805598	15.271977067958296	15.224194597243134	14.974836443562038	15.31741976863626	15.169782189803444	14.636328972471986	14.700463877538423	14.568773431656666
Con_Pmod_vs_Con_Scr	O95391	SLU7	0.0262045	13.341250327103296	0.8182798782531485	0.4315967269596116	0.8383377081920187	-5.60348	13.315267325672998	13.246025078714723	13.32602465710637	13.315445557748893	13.341712567553207	13.308772302288691	13.433925796540242	13.326876915121396	13.371074678134695	13.358965723543353	13.40647071298599	13.34444260982899
Con_Pmod_vs_Con_Scr	O95394	PGM3	-0.0771934	27.09194165370212	-2.38313	0.0375741	0.5358613997467039	-3.66109	27.175541683360283	27.17571715530531	27.08156209620249	27.048756990349617	27.07259642884439	27.079887420918663	27.14272311993975	27.138632635946387	27.224998075315956	27.00583853186284	26.95658181941411	27.000463886965616
Con_Pmod_vs_Con_Scr	O95396	MOCS3	-0.0165763	14.441226454551053	-0.289759	0.7777114203182325	0.9541895079314293	-5.89134	14.397052364476476	14.40667204351306	14.35752602113623	14.358277265121284	14.275245819348427	14.477998431812962	14.545373971271422	14.615498004323427	14.400773226414389	14.480636877834897	14.46683348361635	14.512829945743716
Con_Pmod_vs_Con_Scr	O95399	UTS2	0.023460436525418515	20.003601169579895	0.9447802010319598	0.3662614737500197	0.8132789126679076	-5.49813	20.02697308223066	20.024604165909615	20.049660087213137	20.061753350484828	20.08646157235837	20.02340372208647	19.906145294400744	19.92570877747856	19.979481537536422	19.99880693795625	19.99405134247161	19.966164164832087
Con_Pmod_vs_Con_Scr	O95400	CD2BP2	-0.00319325	14.737068805386492	-0.0929513	0.9277134505196121	0.9847779386674294	-5.92961	14.648967453164303	14.709372254431326	14.699614764946675	14.739558739067949	14.656973965397356	14.65184203235572	14.836203995791006	14.825237293017643	14.79471015396162	14.724390834582884	14.729913706468077	14.82804047145335
Con_Pmod_vs_Con_Scr	O95405	ZFYVE9	-0.0272591	19.536106541912797	-1.26533	0.23344135914299222	0.7387203027034835	-5.17779	19.514240853664365	19.51841118584414	19.492800282492222	19.47083736499498	19.47886163104769	19.493976146329175	19.580484738084444	19.645882176108017	19.61180353863423	19.556041551373177	19.520036532115405	19.549902502265734
Con_Pmod_vs_Con_Scr	O95425	SVIL	0.0687649	22.27351018349121	0.9012975260444426	0.3878815726276227	0.8232706972852815	-5.53579	22.3514	22.402248545089687	22.5495	22.495441445998452	22.464555710696857	22.54944953022734	22.045059901468505	22.13211344254254	21.94398877646028	22.12262348796678	22.26154036510145	21.964197686625447
Con_Pmod_vs_Con_Scr	O95429	BAG4	-0.00221829	17.689070514739964	-0.0683371	0.9468169185130786	0.9877182362068813	-5.93164	17.67890726451592	17.63096194517388	17.67753824573431	17.69822239026409	17.64560665531896	17.636923545829656	17.750572171155763	17.746622007794787	17.703459181907732	17.68221550270344	17.649007523910846	17.768809742570163
Con_Pmod_vs_Con_Scr	O95433	AHSA1	-0.00420601	21.382648678144744	-0.179299	0.8611577539221688	0.9707188763518168	-5.91764	21.423529690821564	21.42153836346376	21.378188074917055	21.390512965838404	21.424504007337102	21.39562113225132	21.350827601595004	21.301951006748588	21.35843110610981	21.376551915571525	21.363109845718036	21.40701842736476
Con_Pmod_vs_Con_Scr	O95453	PARN	0.00976697	15.141009975839339	0.44069210671213455	0.6684802162711789	0.9238497099653658	-5.83585	15.118124925026205	15.16690818852552	15.13715407113272	15.165989392461691	15.11997345134213	15.165525258111051	15.13832428671306	15.114056406886716	15.12754893670345	15.13751242736092	15.172204343933055	15.128798021875555
Con_Pmod_vs_Con_Scr	O95456	PSMG1	-0.0354885	17.73849858025617	-1.29039	0.2249427007186807	0.7387203027034835	-5.14985	17.72529683942379	17.720256183247262	17.69108552304184	17.669903869079683	17.65316082379182	17.707108241228337	17.88501636994314	17.823095800338653	17.79140882624032	17.711197378297395	17.72352330897121	17.760929799470585
Con_Pmod_vs_Con_Scr	O95466	FMNL1	-0.0142111	20.341217121057742	-0.185176	0.8566625420888911	0.9700238487574436	-5.91655	20.541677371891428	20.463673294141937	20.55898870584081	20.70026485575416	20.32700419886836	20.49443703658325	20.236075582954346	20.101976676414505	20.235133540618193	20.12050223882356	20.151948380322477	20.162923570479876
Con_Pmod_vs_Con_Scr	O95470	SGPL1	-0.0100476	22.799256991922178	-0.403784	0.6945718433465121	0.9278156198999042	-5.85147	22.87454996499101	22.909593224592424	22.9108	22.870775731451655	22.88102861445712	22.913043298123117	22.721998087719708	22.73368150297808	22.671185166011124	22.696579789685305	22.734585447766328	22.673215804133044
Con_Pmod_vs_Con_Scr	O95476	CTDNEP1	0.0725953	17.877670346247875	2.3275950994899146	0.0413602	0.5358613997467039	-3.74502	17.77894985618691	17.847678464140444	17.880334808994427	17.93239427779955	17.922884615668494	17.869470233315106	17.929998008314705	17.95107421698549	17.96952691171953	17.811002737269042	17.85784889178729	17.780881132793535
Con_Pmod_vs_Con_Scr	O95477	ABCA1	0.12152143667975857	13.59363638594914	2.0762964904070698	0.0636113	0.5835824181589746	-4.11781	13.554936478795014	13.659790126894146	13.788059309320357	13.85315276464838	13.78766228604994	13.72653517435047	13.353184624064705	13.47501358195512	13.35008990476586	13.507216460118826	13.576956395695154	13.491039524731704
Con_Pmod_vs_Con_Scr	O95478	NSA2	0.0235458	18.752142443245514	0.5971736298857782	0.563201	0.8865401293506525	-5.75523	18.808926085844544	18.808346768412807	18.742760060211076	18.830014009516383	18.827382554415777	18.7733	18.715848094275664	18.659733608562014	18.754816805209824	18.68672404020743	18.63594417629434	18.78193924210751
Con_Pmod_vs_Con_Scr	O95479	H6PD	0.011530615741747852	18.25432464864745	0.34400541198848206	0.7377152796701547	0.9412215414139363	-5.87397	17.976898125438662	18.029080879279263	18.06282067021279	18.060215537419317	17.994936524810008	18.04823945992664	18.496070605939035	18.56439237911194	18.50072546596515	18.4446	18.485305362773634	18.38859300835717
Con_Pmod_vs_Con_Scr	O95486	SEC24A	-0.0427355	23.99593818545533	-2.32536	0.041520291044071414	0.5358613997467039	-3.74839	24.028745072607386	24.03855597357683	24.01261711418808	23.9922	23.96873669979159	23.99079244005295	24.04113204342542	24.051621344344376	24.07917086081753	23.92393536720432	23.914330893782275	23.90943789635561
Con_Pmod_vs_Con_Scr	O95487	SEC24B	-0.00644572	21.79298485745497	-0.267291	0.7944853865712102	0.9570977801628777	-5.89768	21.819354800184517	21.822348884442693	21.80209546667983	21.826280507741995	21.801058654922265	21.79712284082986	21.75203472691074	21.80396794825223	21.797054347693052	21.770471126665804	21.72338527330444	21.800643711832222
Con_Pmod_vs_Con_Scr	O95503	CBX6	0.0705968	16.953116845416663	1.6043794407801202	0.13861935770133024	0.6853321066323252	-4.7697	16.89650590526738	16.913467877687733	16.969337579207266	16.927769526478777	17.04825939320908	17.015072878823062	16.931567579875995	16.934858695638013	16.845829823214473	16.983947912205142	17.058494748142152	16.912290225250864
Con_Pmod_vs_Con_Scr	O95528	SLC2A10	0.0270378	21.548634303147225	1.547477804262867	0.15169909817753197	0.6959371304673119	-4.84237	21.549238006585497	21.520641282148436	21.541207352817327	21.55273306963022	21.565010751157075	21.574456331138407	21.48080898513612	21.47552296689279	21.461261940782435	21.62495083308803	21.62792753996785	21.60985257842251
Con_Pmod_vs_Con_Scr	O95544	NADK	0.00672575	17.83216621005377	0.2307337896916792	0.8220097460116387	0.964596	-5.90692	17.84139226354208	17.806506360275364	17.77641491016293	17.84310061849332	17.774646485112367	17.82674366680347	17.85430477251689	17.872997754456456	17.884786860219574	17.842461493215648	17.784909376698938	17.877729959148226
Con_Pmod_vs_Con_Scr	O95551	TDP2	0.025002179826049797	16.535120943191284	0.3105353782436028	0.7623050733354024	0.9495503640384262	-5.88503	16.712892945619544	16.744779243081553	16.926192451821688	16.908548716143585	16.698556707368162	16.851765756489183	16.241141804988448	16.398335106492254	16.11765787014345	16.262823614113476	16.339896809653354	16.21886029238073
Con_Pmod_vs_Con_Scr	O95562	SFT2D2	0.45154662314559957	23.741726351212236	3.502911055460537	0.00539554	0.3731624097602041	-1.93936	23.601569719701345	23.76081123598194	23.675169657035884	24.14120668521785	24.148659646766035	24.10232415017208	23.3105	23.813176272104265	23.87948707401509	23.636045323326464	23.502375787818625	23.32936787022825
Con_Pmod_vs_Con_Scr	O95563	MPC2	0.12637316439742108	18.51607635957378	2.025394511726163	0.0693359	0.5958456762521784	-4.19159	18.361244244201615	18.477905682850125	18.544828544378888	18.69570798394455	18.54256163034247	18.524828350335877	18.46464424862724	18.665666076407764	18.53873016369892	18.45062039621155	18.438753348256963	18.48742564562939
Con_Pmod_vs_Con_Scr	O95571	ETHE1	-0.0480367	24.828405639304506	-1.20797	0.2538823878071665	0.7439648048457665	-5.24028	25.022007996386765	25.064519894388592	25.01444508073476	24.91015854524736	25.049119188906424	24.997585137477135	24.61909574397741	24.62902871169179	24.67575900088713	24.676018245637607	24.70058601683339	24.58254410948569
Con_Pmod_vs_Con_Scr	O95573	ACSL3	0.027337383917128477	21.7782	0.3684922758087234	0.7199170083416029	0.9349602923931811	-5.86518	21.646469678444586	21.67707763285211	21.818217797758688	21.726933803362353	21.694868926367505	21.801974531076908	21.841744302283487	21.93971942265457	21.72487837834032	21.831214116084013	21.951431518608615	21.683683321624443
Con_Pmod_vs_Con_Scr	O95602	POLR1A	0.013266723376464284	18.993338100904385	0.5310611869191866	0.6065617998022754	0.9031736956218174	-5.79209	18.955376413591697	19.00217285607806	19.02834385568793	19.032840990630543	19.00743086670026	18.985421438156273	18.982275676395354	19.01614007951443	18.95912784871566	18.96730494207539	18.98405993968025	18.999562303626753
Con_Pmod_vs_Con_Scr	O95613	PCNT	-0.0795079	5.382758538940622	-1.06006	0.3131814616830722	0.7770016169248082	-5.3913	5.47968	5.247613585016737	5.216423046588142	5.217629404797446	5.240459556523339	5.247101607443412	5.457955205218832	5.288953946505281	5.552007986037291	5.5857120633599795	5.483121379354863	5.576447100080053
Con_Pmod_vs_Con_Scr	O95619	YEATS4	0.00921572	12.671566104206434	0.29166397783975084	0.7762943083965863	0.9541895079314293	-5.89078	12.552395291943103	12.558133152368567	12.616130531658037	12.638484920351196	12.533250661447235	12.582570545419507	12.824824991072136	12.892414131959107	12.811470572580964	12.679697817434606	12.680625815812263	12.688794818430496
Con_Pmod_vs_Con_Scr	O95625	ZBTB11	-0.0499698	13.989187377034366	-1.76957	0.10614453191845988	0.6600349394757536	-4.55063	14.014006097226645	14.064353727709832	14.019278445771809	14.018162384923086	13.970893405015234	13.95867305396546	13.887444177209725	13.88374555049763	13.897060548339876	14.032330862541464	14.0146	14.109729126226023
Con_Pmod_vs_Con_Scr	O95628	CNOT4	0.0334587	19.604139225755183	1.020813014536848	0.3305649321674644	0.7880879403737766	-5.42878	19.530013604606697	19.58029602521959	19.61657765359412	19.6636	19.60258268418646	19.561083022073436	19.56071656749784	19.62155598538384	19.57858789655268	19.629101933210908	19.624483406738516	19.68107417896474
Con_Pmod_vs_Con_Scr	O95630	STAMBP	-0.0233817	22.037943411132588	-0.889693	0.3937999111753885	0.827785	-5.54559	22.020611461171235	22.023424521717065	22.060131926617508	22.038080080137153	21.967016214217335	22.028926379096575	22.121085433721337	22.170372881207676	22.095868534805184	21.977558836725372	21.98673954941191	21.9655
Con_Pmod_vs_Con_Scr	O95639	CPSF4	-0.00184264	17.03178722563871	-0.0760449	0.94083	0.9873416866963577	-5.93107	16.992061277637887	17.008955650114263	17.046349290957657	16.999732059777315	17.032905706981516	17.009200538529218	17.044563946857217	17.093989008100326	17.044711538610844	17.042643764806222	17.061787061741185	17.004546863550857
Con_Pmod_vs_Con_Scr	O95670	ATP6V1G2	0.0850478	16.777055268214877	2.207286750541437	0.0508729	0.553776	-3.92508	16.67372108402626	16.6336	16.685637168856022	16.786512690200684	16.735309503695955	16.7263	16.760026926337584	16.90078709210932	16.82287484633092	16.885945337550652	16.805435713717745	16.908502386358997
Con_Pmod_vs_Con_Scr	O95671	ASMTL	0.00433967	16.816197192431947	0.10341107017019933	0.9196091664888014	0.9825557355102871	-5.92857	16.772821755762802	16.776157774362815	16.85410736202556	16.892244828368188	16.71880788245003	16.80505320353827	16.875057100662126	16.88617984875191	16.80756899719508	16.77919562766761	16.80955542687791	16.817616501521055
Con_Pmod_vs_Con_Scr	O95674	CDS2	0.038519830017758494	19.36291973328161	1.6906113298214809	0.1206989446182774	0.6673168711010515	-4.65677	19.358682857071088	19.31510981718892	19.392190580717426	19.40046603363908	19.39754398346849	19.38353272792312	19.329977102396217	19.35954381945482	19.313076134111594	19.37288287258109	19.373168189270437	19.35886268155705
Con_Pmod_vs_Con_Scr	O95684:A0A994J5H4	CEP43:NA	0.00753511	16.326479996222254	0.32566091734599373	0.7511564818621554	0.9446365168739791	-5.88017	16.303173616034385	16.308771665387994	16.350110172549574	16.318469385369283	16.33809864433592	16.328092742745326	16.320384035725887	16.316941995136997	16.293434074447166	16.345262570875686	16.384275284909762	16.31074576714905
Con_Pmod_vs_Con_Scr	O95707	POP4	-0.00973429	15.854588388985869	-0.473716	0.6455170694007257	0.9167746629206425	-5.82076	15.8804	15.860643293108172	15.849207289718551	15.821457178725389	15.860020647807172	15.87958603142709	15.890458372565403	15.886258529643696	15.85974604072059	15.827389027413428	15.824660668048626	15.815217441720511
Con_Pmod_vs_Con_Scr	O95714:Q9BVR0	HERC2:HERC2P3	0.025564460293228564	19.011123558960332	1.0153432626512855	0.3330437837156204	0.7887879088001535	-5.43392	18.927357183469816	18.968617346708072	18.97294333471315	19.01512737332265	18.94512115208912	18.985362720358935	19.059698889497753	19.126762020185552	19.076571350957312	19.01977999557749	19.019903175953292	19.01623816469084
Con_Pmod_vs_Con_Scr	O95721	SNAP29	0.016576824361141718	20.17709015034175	0.5057652977033973	0.6235974274021072	0.9092250255657002	-5.80512	20.132623207600364	20.096026596794037	20.091943013745208	20.1395	20.139566266896033	20.091216682430986	20.268160570845787	20.225351727578072	20.252282570075636	20.21221172028684	20.17068781793108	20.30547128802098
Con_Pmod_vs_Con_Scr	O95747	OXSR1	-0.02142	22.82759897070269	-1.08463	0.302657	0.7730168875288558	-5.36727	22.77099902786066	22.802142096347065	22.76066807617163	22.74904266925509	22.772455213821218	22.7481	22.902332420324218	22.92127458770599	22.940812440274815	22.85720957587934	22.840502507911896	22.86569772553417
Con_Pmod_vs_Con_Scr	O95749:A0A2R8YE82	GGPS1:NA	0.0417024	19.341520989722785	0.6685032967648097	0.5184141464453206	0.8652405120249365	-5.71097	19.189543029385796	19.32849003901806	19.405266566078208	19.396268922685767	19.427518638179244	19.224619203692303	19.28175916702058	19.210111590251618	19.241229528769388	19.40149917942218	19.512410208506363	19.47953580366389
Con_Pmod_vs_Con_Scr	O95757	HSPA4L	-0.0456323	18.05949916427422	-1.65707	0.12740671173294413	0.6686702013769092	-4.70108	18.370387503001613	18.36248326355628	18.385139651863135	18.33668584454564	18.281323869189485	18.363103907420623	17.76117682857372	17.780243010045048	17.69305856336349	17.78907404175007	17.80384697101923	17.787466516962347
Con_Pmod_vs_Con_Scr	O95758	PTBP3	-0.0252878	22.164101574745352	-0.653061	0.5279285958757001	0.8711998946186303	-5.72094	22.26590289227395	22.23480579894652	22.325724964761328	22.238443013999873	22.226972014407316	22.285155306623174	22.082764633744432	22.09979258256516	22.001732164512585	22.07411006632765	22.12993743949934	22.003878019282887
Con_Pmod_vs_Con_Scr	O95759:Q0IIM8	TBC1D8:TBC1D8B	0.0217916	22.433319578077043	0.5563017584740143	0.5898051373807887	0.8973533441280864	-5.77849	22.374732131853055	22.413373412617275	22.49554440010242	22.445322882620545	22.45867514558281	22.44502679967487	22.47654059582416	22.56329008881711	22.437912280078127	22.36280908814343	22.40916118160623	22.317446930004497
Con_Pmod_vs_Con_Scr	O95777	LSM8	0.0637155	18.18509469852999	1.916895812585977	0.0831933	0.6187286801217838	-4.34644	18.093138470279616	18.09719995697317	18.168998075280612	18.21606659414521	18.135959219066816	18.198457215196484	18.23839160466265	18.253962569842997	18.197250068750535	18.20458201594478	18.25646504816148	18.16066554405553
Con_Pmod_vs_Con_Scr	O95782	AP2A1	-0.0405007	24.662995428690383	-1.74629	0.11026081769462448	0.6600349394757536	-4.58218	24.70326924044088	24.736393185673688	24.668411631434974	24.641283909394353	24.684749900765308	24.66053821960467	24.5955	24.598999013969017	24.62767676404781	24.681083342983005	24.65907409506426	24.698988944831243
Con_Pmod_vs_Con_Scr	O95793	STAU1	-0.024834	22.474358093953473	-0.756221	0.4663470082542528	0.8479055457704144	-5.65036	22.486734997701536	22.513716380162883	22.500027818756596	22.516495935270363	22.47138396836208	22.438097161058785	22.451720782824783	22.507182688387424	22.48972573727152	22.429871331247774	22.380834164292366	22.506506162105563
Con_Pmod_vs_Con_Scr	O95801	TTC4	-0.0238728	18.21327293357735	-0.500862	0.6269269470165998	0.9092250255657002	-5.80758	18.11108289356855	18.089336288473007	18.04807231318815	18.11379573986152	18.051500555815185	18.011576912277743	18.390379818372473	18.339570980754264	18.42086087086734	18.30621052889696	18.237858008551843	18.439030292301165
Con_Pmod_vs_Con_Scr	O95810	CAVIN2	-0.121709	21.417335116605724	-2.04612	0.0669485	0.5935206089594622	-4.16162	21.88287733637104	22.0036	21.852148846673717	21.646681382446246	21.889898892129175	21.8369	21.01666600603103	21.06508557403334	20.95756053438412	20.949624280379883	20.95545680928633	20.951470147733502
Con_Pmod_vs_Con_Scr	O95816	BAG2	4.8616164076875634e-4	23.109716859351114	0.0210065	0.9836391403649642	0.9953991300875171	-5.9338	23.11708074689922	23.153918201540524	23.117580317569143	23.1281	23.156047678987665	23.105921980444332	23.040534867774053	23.002476156613017	23.071520944554955	23.13347135374777	23.14243695399795	23.14754501858552
Con_Pmod_vs_Con_Scr	O95817	BAG3	-0.0308929	25.847463119761336	-0.694118	0.5028598660384851	0.8605521265437722	-5.69397	25.997355607072254	25.874991895133444	25.86412199281192	25.886219516050687	25.893542312029176	25.86402895417858	25.749062494743757	25.70465223000144	25.803159692892564	25.85786179158681	25.76461233204772	25.909948618587684
Con_Pmod_vs_Con_Scr	O95822	MLYCD	0.0541443	21.402273688638793	0.9024203182460256	0.38731224972834166	0.8232706972852815	-5.53484	21.33168816904309	21.40834043099369	21.48806319526916	21.480513017555392	21.411090885138996	21.49892071562432	21.324	21.468990485183905	21.31745917326695	21.383833198669983	21.458814347770502	21.255602174789612
Con_Pmod_vs_Con_Scr	O95825	CRYZL1	-0.0327434	19.449603236051132	-1.56337	0.14794081393942538	0.694261	-4.82223	19.50362119810887	19.570697963997805	19.52947312636668	19.49958464450157	19.50433749251907	19.50164009138657	19.38421060456052	19.42498789838487	19.40375883369272	19.355542414009847	19.359276753290377	19.35810781179468
Con_Pmod_vs_Con_Scr	O95831	AIFM1	0.027673507453176427	24.0649	1.069588660989802	0.30906613976919933	0.7736762999204284	-5.38203	24.097349241505608	24.112216463145018	24.15383114737989	24.162290162840073	24.123540936469418	24.160586275080547	23.982516516307317	23.9777	23.923177319616254	24.017453300303345	24.063035531319297	24.004616678398957
Con_Pmod_vs_Con_Scr	O95832	CLDN1	-0.0308909	31.945568391633532	-0.260925	0.7992584124020724	0.9586247152798135	-5.89938	32.14116096683048	31.91400451009175	31.816595968190107	31.683543063127946	31.944529897012615	32.15101573732647	32.00788582301936	31.800718657567096	31.77207390223403	32.08026842549029	32.099311430659796	31.935712318052456
Con_Pmod_vs_Con_Scr	O95833	CLIC3	-0.0678932	27.301811383119958	-1.12351	0.28655490439730846	0.7614365538045824	-5.32836	27.34364998144617	27.285950519298545	27.37913833276667	27.2677	27.182381226023395	27.354939714305452	27.311061271324604	27.482909487623367	27.277667690330027	27.28751592972077	27.283119720012778	27.165664341305135
Con_Pmod_vs_Con_Scr	O95834	EML2	-0.0571867	25.031319761804916	-1.67991	0.12280432851595596	0.6678546603679277	-4.67096	25.191798782360216	25.125236743470087	25.14248978814279	25.12183843464566	25.02766540101072	25.13846131978252	25.00463687990814	24.956889484880996	24.91724196542901	24.906745947322097	24.90088570785822	24.94194668684852
Con_Pmod_vs_Con_Scr	O95857:Q12999	TSPAN13:TSPAN31	-0.032775	21.169029771048766	-0.520195	0.6138504964738299	0.9064334433912629	-5.79776	21.19665795361519	21.12426392343782	21.067759692702673	20.95445630114531	21.152828820423498	21.183071332657477	21.36535765608051	21.221765526705084	21.244305055991653	21.181921561542055	21.2264	21.109585600189437
Con_Pmod_vs_Con_Scr	O95859:P46939	TSPAN12:UTRN	-0.0163217	22.388	-0.883093	0.3971942515801321	0.827785	-5.55111	22.38098014470461	22.413831932007724	22.39867399412252	22.385755649662674	22.39084444160687	22.36792089823157	22.395176487636295	22.403352920622773	22.39003168826605	22.36628317201105	22.36501468137841	22.398240697709426
Con_Pmod_vs_Con_Scr	O95861	BPNT1	0.032077956524975804	23.86942731649902	1.366557241253185	0.20065789374362045	0.721058	-5.06258	23.820717545158537	23.82705203594911	23.85983801769413	23.906369578018985	23.854705191221676	23.84276669913604	23.80945430098124	23.8551	23.83320258934752	23.939082974462153	23.9241	23.96075060545385
Con_Pmod_vs_Con_Scr	O95864	FADS2	0.0850296	13.796604008107103	1.7318310623032434	0.1128904537171741	0.6628	-4.60168	13.709383681269877	13.658934212927084	13.78180386943367	13.785980577175842	13.770191165528118	13.849038735241322	13.808946727345116	13.883798145305883	13.716481157306736	13.879037946562832	13.92247052710882	13.793181352079936
Con_Pmod_vs_Con_Scr	O95865	DDAH2	0.016406819588478783	18.30637148332652	0.48999529408232745	0.6343371326168978	0.9120600632772788	-5.81294	18.18708397569698	18.23764542000577	18.21750695482455	18.219048607469457	18.22066002912724	18.251748172696026	18.378422871883625	18.483435119231697	18.46017677048559	18.370244069704476	18.37186655942724	18.27861924936559
Con_Pmod_vs_Con_Scr	O95870	ABHD16A	-0.0278555	22.155492367600814	-0.746061	0.4722028388167486	0.8506867547580212	-5.65772	22.25626301133487	22.22951663893139	22.185333394469048	22.16131749013747	22.240075869008844	22.186153267064473	22.10970022123205	22.034151763070422	22.183633252048704	22.10902744105806	22.103360581025047	22.06737548182941
Con_Pmod_vs_Con_Scr	O95873	C6orf47	0.10258598406895025	15.924288596233039	1.5285554391956966	0.15628218438374222	0.6987405136268369	-4.8662	15.62390766743724	15.907206302043496	15.803731370977928	15.89543606088412	15.944665138592343	15.802502093189052	16.02062159491872	16.1441	16.170096492093307	15.913054958747814	15.963362390931003	15.902745720279434
Con_Pmod_vs_Con_Scr	O95881	TXNDC12	-0.0305249	20.33377843736866	-0.579386	0.5746976750838417	0.8906654304829315	-5.76554	20.482205202643595	20.40845577547533	20.395840638124476	20.35648030453984	20.44489272480181	20.39355387330518	20.23169903400324	20.15250995953979	20.36008294854235	20.300229485489847	20.298057104444904	20.181334197513568
Con_Pmod_vs_Con_Scr	O95905	ECD	0.0069035	18.624587537892083	0.18296820742693612	0.8583504775691932	0.9700238487574436	-5.91696	18.566342475422516	18.593704589294596	18.586997432996142	18.641588537863885	18.54908549532774	18.57708097070611	18.727799247487113	18.683735422364528	18.637244753141292	18.601946735914556	18.60635399280112	18.723170801385383
Con_Pmod_vs_Con_Scr	O95926	SYF2	0.043819	13.76904513387977	1.2596432351706681	0.23540695312053975	0.7392859702681261	-5.18408	13.676319831947826	13.70345758262896	13.79013868695888	13.791937380255211	13.809928133174566	13.699507698587045	13.821181736856383	13.850271977044052	13.81838845192385	13.738916882966436	13.763325005603322	13.765168238610702
Con_Pmod_vs_Con_Scr	O95980	RECK	0.14019637638518745	18.575468281017034	2.6659196837712615	0.022981974298672218	0.4951570826168469	-3.22816	18.520592497301017	18.61360515021537	18.58910641364557	18.70818072294558	18.810595158498742	18.625117308873193	18.378141200569416	18.46170881831749	18.56197896778901	18.56232080761821	18.542549518692027	18.53172280773878
Con_Pmod_vs_Con_Scr	O95983	MBD3	0.0472403	10.681604309134867	1.554584420690503	0.15000843729205407	0.6943749929339221	-4.83338	10.625953753577583	10.627787651515543	10.6873	10.727106454720415	10.7112	10.644448874353682	10.648998704026996	10.708378738430454	10.662183042110088	10.70390505022898	10.681683402145447	10.75036876167712
Con_Pmod_vs_Con_Scr	O95985	TOP3B	-0.0358709	10.297342511980938	-0.642662	0.5343925908255902	0.8749702499707683	-5.72753	10.224874143608227	10.206447602582909	10.150036975081964	10.220192725828603	10.138818640631223	10.114734558646711	10.406922518705231	10.477285978321785	10.520092718972863	10.37445929617344	10.246567891012957	10.487677094205347
Con_Pmod_vs_Con_Scr	O95989	NUDT3	-0.0469439	15.486774446045025	-0.818067	0.431713	0.8383377081920187	-5.60365	15.316260518975191	15.46265530807528	15.512595617602406	15.44492333673753	15.413979471967249	15.291776790056922	15.588571644832331	15.590482014181982	15.671122735473755	15.495101455111728	15.592058801402192	15.461765658123742
Con_Pmod_vs_Con_Scr	O95995:Q9P2E9	GAS8:RRBP1	-0.0350664	25.024941443593512	-0.758671	0.4649419165165908	0.8479055457704144	-5.64857	25.117880951974005	24.98535182664416	24.965425020447736	24.93608574291067	25.02143705785349	25.00593583394099	25.07704046456431	24.969006782556185	25.10881975921079	25.06226068508235	25.0224	25.027645203342857
Con_Pmod_vs_Con_Scr	O95999	BCL10	-0.0420162	18.37863699763429	-2.59873	0.0258367	0.5067923048135473	-3.33167	18.395344668968217	18.41649502124976	18.406692240238044	18.35871197689007	18.372060532595047	18.3617	18.376273977432795	18.37444566385847	18.37322796795011	18.36606277641174	18.37560679464382	18.367
Con_Pmod_vs_Con_Scr	O96000	NDUFB10	-0.00770266	22.784285821300628	-0.326307	0.7506812228132954	0.9446365168739791	-5.87996	22.77845949927455	22.81995550550831	22.831581759320223	22.79956021651818	22.804883286130295	22.802445273887084	22.769614985025648	22.776570732572992	22.770216355265244	22.752146068025475	22.79410766290795	22.71188851117159
Con_Pmod_vs_Con_Scr	O96005	CLPTM1	-0.0171968	24.115744846988125	-0.351217	0.7324564643937344	0.938396	-5.87144	24.213124593582258	24.190586831748895	24.092520863093497	24.151927122518185	24.17711254080693	24.115602195691057	24.101763699240124	24.049514612577724	24.201628054367323	24.03542511758091	23.95401102420992	24.105721508440677
Con_Pmod_vs_Con_Scr	O96007	MOCS2	-0.0022917	21.194409159728508	-0.060332	0.9530380603863977	0.9877182362068813	-5.93216	21.200353439476935	21.21560710897371	21.12694884951238	21.201497263142777	21.167957341871524	21.1666	21.228736276109355	21.139049659537307	21.235166241699385	21.19543312867925	21.168573430906942	21.287007495103115
Con_Pmod_vs_Con_Scr	O96008	TOMM40	0.0739214	18.85520109041258	2.294522464115371	0.0437884	0.5358613997467039	-3.79477	18.856135220892934	18.873164193051167	18.93901881539369	19.01024458836496	18.933396111707214	18.9464	18.74285891900279	18.837355823580115	18.755935893502116	18.79089267533486	18.78884883172153	18.78812040543361
Con_Pmod_vs_Con_Scr	O96011	PEX11B	0.1397387101521943	20.925212031234434	2.1259566449474434	0.058460156563763875	0.5693936031158129	-4.0452	20.97665642747643	20.96468958996929	20.89251229438618	21.071919349379076	21.07045311992572	21.110701972983676	20.718757031012792	20.925	21.007793827050065	20.879498498453973	20.76947776482121	20.715095486822477
Con_Pmod_vs_Con_Scr	O96013:Q9P286	PAK4:PAK5	-0.00804457	17.2802	-0.362279	0.7244171209559684	0.9369848517367537	-5.86746	17.217129783203827	17.244928838221327	17.25929407449078	17.226598765039178	17.2312	17.239416512952985	17.31189331127405	17.361381985101406	17.318081359614556	17.324463521141375	17.34105728015756	17.287079110709158
Con_Pmod_vs_Con_Scr	O96017	CHEK2	-0.0182297	11.773221752228674	-0.415056	0.686557	0.9269120979652602	-5.84684	11.93223944863218	11.7412	11.792854210698655	11.776890180471169	11.778673578207083	11.8561	11.783580934638769	11.768303817520046	11.78626541468082	11.728372170688042	11.663886953899778	11.67031241079454
Con_Pmod_vs_Con_Scr	O96018	APBA3	0.00230376	7.111333466649305	0.025326339193738983	0.980275	0.9937311601549295	-5.93369	7.171530821315711	6.974000943726305	7.122578436216935	7.190523274116429	7.028954812204272	7.0555433842748485	7.219894699479621	7.1096675909019735	6.989656097006588	7.093811293753927	7.022315089382913	7.357525157412136
Con_Pmod_vs_Con_Scr	O96019:O94805	ACTL6A:ACTL6B	-0.00113881	16.2042	-0.0496997	0.961306	0.9886346544163713	-5.93276	16.145028593818076	16.16757529118149	16.158611042480793	16.139552794767585	16.14445484750232	16.183790841446008	16.262111225297144	16.29110730524149	16.215779062117086	16.245225898910064	16.257551592620725	16.23999978163084
Con_Pmod_vs_Con_Scr	O96033	MOCS2	-0.00342363	19.03438781587183	-0.1432	0.8888764858495439	0.9760192068290906	-5.92356	19.045150074452856	19.00631552730849	19.017104265244157	18.97366402068551	19.057900924520744	19.02673402407868	19.039569374219713	19.06360284661889	19.04569071942216	19.062129988427554	19.042701159311267	19.032090866171952
Con_Pmod_vs_Con_Scr	P00167	CYB5A	-0.0446569	16.111533944250944	-0.500453	0.6272054345514975	0.9092250255657002	-5.80778	16.1501	16.086113530826108	16.22605835609827	16.227458599988424	15.98682914778244	16.113965967346175	16.243614755269018	16.26730331401864	15.986822594407023	15.951233759442824	15.934235346452962	16.16471957216396
Con_Pmod_vs_Con_Scr	P00338:P07864	LDHA:LDHC	-0.0795845	22.73261543445648	-1.39633	0.19177969422914334	0.721058	-5.02755	22.90624397979632	22.830058734707247	22.714868263716507	22.708041636213995	22.75682366642097	22.74755206591666	22.66552677605709	22.599346329392755	22.808049169622866	22.720574954109782	22.633311174476667	22.70098846304691
Con_Pmod_vs_Con_Scr	P00374:Q86XF0	DHFR:DHFR2	-0.146749	11.95348430754663	-1.61988	0.1352335671340367	0.6809565597188392	-4.74964	12.034365914267868	11.879035477985605	11.774872466763288	11.847200193212403	11.588175382907126	11.812650403317434	12.29680681163574	12.159915604582508	12.272457971948601	11.915857460248889	11.789662551026511	12.070811452663586
Con_Pmod_vs_Con_Scr	P00387:A0A087WZB1	CYB5R3:NA	-0.130773	25.147914925368426	-2.44274	0.0338862	0.5307865960767675	-3.57052	25.237952704010997	25.23315287266396	25.094682327245906	25.02164555446397	25.09121560598687	25.0606	25.219315410086057	25.042845351648488	25.19887197185806	25.168362592530215	25.1494	25.25695345054778
Con_Pmod_vs_Con_Scr	P00390	GSR	-0.015141	22.029892684616073	-0.84624	0.41651744991796724	0.8326474820971248	-5.58131	22.048673110572324	22.02962419120498	22.024520391657187	22.032436540466097	21.997952263201388	22.027005882769256	22.042543427520325	22.035946689746435	22.046799998191027	22.026422146265254	22.012951590216232	22.033835983582374
Con_Pmod_vs_Con_Scr	P00395	MT-CO1	-0.209012	16.415904864868644	-1.79239	0.10224567315575103	0.6543354960732581	-4.51951	16.583856705267753	16.597866651984386	16.310600468616332	16.034681612363112	16.358259248991686	16.472346165441635	16.51140061520426	16.234488169709135	16.313312706570965	16.52260504712972	16.60183381774265	16.449607169402103
Con_Pmod_vs_Con_Scr	P00403	MT-CO2	-0.0158446	19.71053446330799	-0.409539	0.6904749178576122	0.9275036210027627	-5.84913	19.81795948372408	19.819816021837543	19.79761927585728	19.758479457512376	19.80259718743806	19.82678431536268	19.6231	19.654304711489637	19.713346197115538	19.610179675126684	19.623131765455604	19.47910954004361
Con_Pmod_vs_Con_Scr	P00414	MT-CO3	-0.153521	12.00662764906291	-2.28473	0.0445336	0.5366674357526948	-3.80947	11.973823962163014	12.103661171133004	11.931551644807056	11.796587340406916	11.924508577591308	11.82737935336652	12.110638241232325	11.859346663306102	11.993063820233406	12.114184076687646	12.189779243350545	12.255007694477074
Con_Pmod_vs_Con_Scr	P00441	SOD1	0.0026823	22.46235092754584	0.056901	0.9557054856402953	0.9879240501642578	-5.93237	22.475756628239836	22.360984929362964	22.33116899798064	22.39800735397748	22.38803228442308	22.38991781588657	22.532258496558963	22.521066164330023	22.67344874803231	22.53358826862338	22.438698063101526	22.505283380033337
Con_Pmod_vs_Con_Scr	P00492	HPRT1	-0.0157345	15.941638563707942	-0.469104	0.6487014546897041	0.9178950066350396	-5.82293	15.919882918169916	15.930824937036997	15.961903405425758	15.934969455143005	15.866007210816136	15.964430998417557	15.996834196353324	15.985804288464529	15.919934897909764	15.932744186307964	15.989168625148622	15.897157645301734
Con_Pmod_vs_Con_Scr	P00505	GOT2	-0.0560455	24.820509573796322	-1.46126	0.1735702389151118	0.7095296467100889	-4.94947	24.93222464576378	24.911459313746462	24.811587731390823	24.775415270044093	24.84435119853501	24.867368608067512	24.764801079436076	24.710000788499563	24.814197959592285	24.826470479574873	24.803347956633143	24.784889854272254
Con_Pmod_vs_Con_Scr	P00519	ABL1	0.029789325963299973	20.435508805795028	0.7575529350057246	0.4655827666483495	0.8479055457704144	-5.64938	20.39825571558282	20.371426257847656	20.468734840740986	20.515922137723138	20.399103089684264	20.412759564653975	20.446488800649337	20.52556540801784	20.43681335696316	20.410093793904075	20.38621261359819	20.454730090174905
Con_Pmod_vs_Con_Scr	P00533	EGFR	-0.0373351	16.464534436671247	-0.851861	0.4135293912895466	0.8319509989596985	-5.57677	16.742344503627262	16.77547107218716	16.637370925527044	16.663551231954216	16.711456511462792	16.66817332906276	16.232889492602155	16.196560134904857	16.32043183879551	16.210883450356324	16.151564721463462	16.263716028111432
Con_Pmod_vs_Con_Scr	P00558	PGK1	-0.0444368	25.364401349556115	-1.6972	0.11941939728821344	0.6665809340429043	-4.64801	25.488294764676436	25.44169619769959	25.419948412298112	25.42252839333649	25.37912762099437	25.414973026477742	25.30665888730647	25.297884624841476	25.363840164048863	25.295579960520648	25.255291417109607	25.28699272536356
Con_Pmod_vs_Con_Scr	P00568	AK1	-0.0678839	22.631863941315956	-1.7048	0.11795708938801269	0.6665809340429043	-4.63788	22.70941794956732	22.696241520282495	22.6118	22.60478878902232	22.61396086731883	22.595086198252556	22.64029445359554	22.5906	22.75452714032928	22.605298297683976	22.56213223264722	22.59815598959443
Con_Pmod_vs_Con_Scr	P00749	PLAU	0.15880230654736494	19.086631287609613	1.1650432936308959	0.27009868289235045	0.749571	-5.28564	18.732619428342357	18.856087502383694	19.09757576232378	19.02087686339264	19.01084139663917	19.13097135266013	19.077952638654622	19.26845714737756	18.933767104984305	19.32300107009776	19.568127613121952	19.01929757133741
Con_Pmod_vs_Con_Scr	P00750	PLAT	0.017086427672062143	21.691560589641586	0.23190647234404757	0.8211226700818943	0.9641919379491772	-5.90664	21.5265	21.8031	21.73174301240077	21.66677232897755	21.715012414052623	21.730833509519375	21.655500346460432	21.782200749071627	21.63387756067741	21.670946452594674	21.801067865070937	21.58115687974103
Con_Pmod_vs_Con_Scr	P00813	ADA	0.0526781	19.72119844396315	1.6978230928966964	0.11929862134134717	0.6665809340429043	-4.64718	19.793095100029245	19.91865395794277	19.852673429547696	19.888684004271298	19.92475498018459	19.90901769640779	19.520459850148782	19.549517814267904	19.539223354694087	19.579387789760624	19.62296983541541	19.555943514887613
Con_Pmod_vs_Con_Scr	P00846	MT-ATP6	0.7148966120277827	23.796549049750325	3.9626918567272402	0.00249157	0.31575534432011215	-1.25515	23.422065426229523	23.5338	23.52117749894053	24.196435730665225	24.26942414208699	24.15584152149519	23.465664119181447	24.080816947479324	24.25844716556156	23.772936726924947	23.62662792952543	23.25538275591973
[truncated: 41,510 more rows]

## Sheet: Sample Z-scores
Uniprot_Accession	Gene_Name	C4_ASO-S_1	C4_ASO-S_2	C4_ASO-S_3	C4_ASO-T_1	C4_ASO-T_2	C4_ASO-T_3	II:3_ASO-S_1	II:3_ASO-S_2	II:3_ASO-S_3	II:3_ASO-T_1	II:3_ASO-T_2	II:3_ASO-T_3
[truncated: 7,110 more rows]

[truncated: 2 more sheets: Filtered restored proteins, Not represented in Pathway ana ]
