# Supplementary material for: A severe neurodevelopmental syndrome linked to a South Asian founder variant in the UFMylation adaptor CDK5RAP3
Source: Acta Neuropathol. 2026 Apr 27;151(1):48. doi: 10.1007/s00401-026-03017-2 (PMC13121207; doi:10.1007/s00401-026-03017-2)
Supplement: Supplementary file 5 — Supplementary file5 (XLSX 21002 KB) [file 401_2026_3017_MOESM5_ESM.xlsx]

## Sheet: Differential Expression - All
Comparison	Phospho_ID	Uniprot_Accession	Gene_Name	Phospho_Type	Phospho_Sequence_Position	Phospho_Sequence_15mer	Log2_Fold_Change	Average_Log2_Expression	T_Statistic	P_Value	Q_Value	B_Log_Odds	C4_ASO-S_1	C4_ASO-S_2	C4_ASO-S_3	C4_ASO-T_1	C4_ASO-T_2	C4_ASO-T_3	II:3_ASO-S_1	II:3_ASO-S_2	II:3_ASO-S_3	II:3_ASO-T_1	II:3_ASO-T_2	II:3_ASO-T_3
Con_Pmod_vs_Con_Scr	A0A087WUA7|794	A0A087WUA7	ZNF804B	S	794	RNQESLGSPHICDLG	0.011508353146645334	20.425060598775765	0.30575615524107747	0.7657328474204987	0.8985397445062303	-6.43972	20.557618813838207	20.45019734309211	20.52186258609247	20.510192485827805	20.53577739377976	20.518233922855156	20.2661	20.24231567236516	20.32430663234508	20.434021474619243	20.411784484458156	20.32832471432783
Con_Pmod_vs_Con_Scr	A0A087WZ13|567	A0A087WZ13	RAVER1	S	567	QLKSRLLSPLSSARL	0.10526054202602886	14.034012360474943	3.1103032003922704	0.010385911302443606	0.10769366000962732	-2.84936	14.18879155352267	14.109991051028464	14.1517	14.236337063967374	14.274621547918224	14.255294995765608	13.90271486632566	13.99426452015332	13.969901687109004	13.822557309398093	13.746206068467629	13.755778285021272
Con_Pmod_vs_Con_Scr	A0A087WZG9|355	A0A087WZG9	PEG10	S	355	KSSPAGNSPAPL___	-0.0350929	14.315736888568507	-0.83545	0.4219635925614038	0.6921734089487425	-6.12821	14.279909067401732	14.243503761334985	14.265422161704995	14.288528738836574	14.15000999833994	14.245017482417786	14.287205602578664	14.311408267042523	14.211638398272155	14.478049578283107	14.466038546405985	14.562111060203629
Con_Pmod_vs_Con_Scr	A0A087X0W0|41;43	A0A087X0W0	RAN	S;T	41;43	LSPHQKLSWTQLWQH;PHQKLSWTQLWQHSM	0.10012403556436311	17.472598799259202	0.504916	0.6239872357535583	0.8271371271286373	-6.35478	17.166157036089462	17.428231933211755	17.444088002318313	17.33268353322381	17.696419675234697	17.309745869854105	17.7233	16.929219365155692	17.268479240533182	17.52531981220697	18.082406451670316	17.765105024018347
Con_Pmod_vs_Con_Scr	A0A087X1R1|620	A0A087X1R1	SMTN	S	620	FSTRRRSSTGTTRST	0.16058942256943176	11.304453618327544	3.0846102700954043	0.010863496631764925	0.10991573235082089	-2.89308	11.070210573332936	11.22006130141699	11.15192997619734	11.2338	11.42064789986057	11.269563113470689	11.211627095106316	11.164935320024846	11.153459684295402	11.535741044466008	11.60953106778855	11.611977238646585
Con_Pmod_vs_Con_Scr	A0A087X251|49	A0A087X251	KIZ	T	49	LLREAGPTPARAAGQ	0.0488631	17.936943738389928	1.6731472278236263	0.12362299665775323	0.3903884104981681	-5.16491	17.85791896467554	17.87048589816509	17.866320093188733	17.95022853355225	17.869077774272508	17.922007845140435	17.965591861679457	17.89871278803838	17.913581238527488	18.014640781038203	18.058944578073863	18.055814504327188
Con_Pmod_vs_Con_Scr	A0A096LP25:Q6ZSR9|901:93	A0A096LP25:Q6ZSR9	AAK1:NA	S	901:93	PFAPPEVSPEQAKTV:PFAPPEVSPEQAKTV	-0.061158	16.681429880095298	-1.46232	0.17276511561666363	0.45392108402467357	-5.45008	16.531197575950273	16.551639036760168	16.546366994401353	16.540645591615842	16.41182881552713	16.49325515388723	16.958032063438083	16.908834438247073	16.847153205474967	16.743178238689055	16.7888	16.8563
Con_Pmod_vs_Con_Scr	A0A096LP69|167	A0A096LP69	CD99	S	167	QGEVDMESHRNANAE	0.0492202	16.108488740069763	0.94297	0.3667684406049494	0.647065	-6.03322	16.064154357992038	16.298223103343155	16.126457427784626	16.1766	16.24724967059324	16.212646007965425	15.892483835851618	15.95648067251878	15.915737442143548	16.10618043094047	16.126585301070538	16.179066678632324
Con_Pmod_vs_Con_Scr	A0A0A0MR39|431	A0A0A0MR39	MYEF2	S	431	INRGFGDSFGRLGSA	0.1018676648566359	12.502529837889993	0.5855438876143099	0.5704827519637308	0.7933388459672616	-6.30907	12.014107990285469	12.714102326278676	12.182695495742914	12.15525247003156	12.683552507878552	12.377703828966837	12.539297565222528	12.8486	12.853917048823163	12.570125233349046	12.537128079054812	12.553842705168964
Con_Pmod_vs_Con_Scr	A0A0A0MRA8|448	A0A0A0MRA8	EPB41L3	S	448	SRSLDGASVNENHEI	0.13278746436413869	19.94514583249324	2.5599362444167677	0.027289060784283267	0.1798380441101044	-3.7796	20.4197	20.26494194357781	20.356677290866735	20.453490565742644	20.5074	20.47869875053052	19.40135714716233	19.436313686407956	19.52517790015956	19.580746737015517	19.506694354288925	19.41055621544209
Con_Pmod_vs_Con_Scr	A0A0A0MRJ1|1017	A0A0A0MRJ1	CDC42BPA	S	1017	SVKFHIQSRSTSPST	0.18601962141033468	17.85873615598459	4.368684841758087	0.00123261	0.0374032	-0.754739	17.86112244988807	18.001547701362952	17.897114319821398	18.052306703622097	18.16660615935904	18.098930472322287	17.48776981963949	17.496776756779777	17.565045007433277	17.89835291898384	17.917083859882368	17.86217770272051
Con_Pmod_vs_Con_Scr	A0A0C4DFT3|636	A0A0C4DFT3	DLG1	S	636	SKTRDKGSFNDKRKK	0.0496574	14.834473273830342	1.0873633425214853	0.3010706331836178	0.5904461187829807	-5.8907	14.729866945371311	14.830223440050672	14.716122552325368	14.786272202566042	14.808179393950336	14.83073360787185	14.88412385520671	15.006520607334105	15.04398586605666	14.842667258210907	14.777380289993262	14.75760326702688
Con_Pmod_vs_Con_Scr	A0A0C4DFT3|664	A0A0C4DFT3	DLG1	S	664	DQSEQETSDADQHVT	0.0576482	13.117521275830287	0.9157902277429747	0.3802137282424757	0.6582060606951711	-6.05816	12.936270615872775	13.136880826418077	12.96420247096568	13.00964541704575	13.124559884680895	13.076093078991091	12.975336151579777	13.18271762976277	13.094898469618382	13.32549487309286	13.248841705956126	13.335314185979255
Con_Pmod_vs_Con_Scr	A0A0C4DFT3|675	A0A0C4DFT3	DLG1	S	675	QHVTSNASDSESSYR	-0.0496792	16.21741865708548	-1.02234	0.32946868163580456	0.616439	-5.95693	16.10990050103501	16.2769	16.18306645551017	16.149588305223595	16.137109980815193	16.134176833042368	16.284205928627674	16.18337307956514	16.178372517916035	16.244306822973034	16.353436143687254	16.374541466998384
Con_Pmod_vs_Con_Scr	A0A0C4DFV9|23	A0A0C4DFV9	SET	T	23	NHDGADETSEKEQQE	-0.111009	17.24911459949456	-1.4445	0.1776054152782525	0.4607687660520702	-5.47307	17.157663992871683	17.3194	17.232281489590147	17.075109281919786	17.197734359791152	17.103524211595023	17.305645014071594	17.067484461612125	17.322594493889834	17.366427543735377	17.528414427941772	17.313047789106747
Con_Pmod_vs_Con_Scr	A0A0C4DFX4:Q6ZRS2|1682:1859	A0A0C4DFX4:Q6ZRS2	NA:SRCAP	S	1682:1859	TLRSGPPSPPSTATS:TLRSGPPSPPSTATS	-0.0449695	13.784320345071713	-0.94426	0.366139	0.6469454743034984	-6.03202	13.83885443277624	13.669932250001589	13.79799257821419	13.781617604340015	13.661166628728797	13.729086665357022	13.89624810793774	13.881648673241203	13.80423507147546	13.777240939227491	13.756901061980829	13.816920127579984
Con_Pmod_vs_Con_Scr	A0A0C4DFX4:Q6ZRS2|2547:2724	A0A0C4DFX4:Q6ZRS2	NA:SRCAP	T	2547:2724	ARPPRRRTSADVEIR:ARPPRRRTSADVEIR	-0.103595	13.282468657567565	-2.92764	0.014305414844106515	0.128983	-3.15994	13.30241122079961	13.333914200543344	13.308323773804393	13.18004359304204	13.249647127322875	13.20417370478157	13.287636043060512	13.399643795994564	13.304107481483143	13.281809076323452	13.230192217152744	13.307721656502522
Con_Pmod_vs_Con_Scr	A0A0C4DFX4:Q6ZRS2|2613:2790	A0A0C4DFX4:Q6ZRS2	NA:SRCAP	S	2613:2790	ETSASPGSPSVRSMS:ETSASPGSPSVRSMS	-0.0142455	14.971264657771314	-0.583638	0.5717179401779002	0.7935185015249264	-6.31023	15.000229014786372	14.955054438171423	14.986655129690137	14.979241900937229	14.95166923650572	14.96829092361273	14.980046611520022	15.004813553789695	14.9606	14.958279965873183	14.937251963807274	14.97308236560038
Con_Pmod_vs_Con_Scr	A0A0C4DFX4:Q6ZRS2|2692:2869	A0A0C4DFX4:Q6ZRS2	NA:SRCAP	S	2692:2869	RPPKKNRSPADAGRG:RPPKKNRSPADAGRG	0.032444383572498126	13.9789	1.2291187911867187	0.24571071385287674	0.5365059100366625	-5.73534	13.894050966428887	13.87091557816388	13.896700193361264	13.945660256738504	13.89270278119319	13.920636850739822	14.136814760628372	14.096161662429012	14.076	13.983025920301436	14.007349903067212	14.026874250728213
Con_Pmod_vs_Con_Scr	A0A0C4DFX4:Q6ZRS2|2971:3148	A0A0C4DFX4:Q6ZRS2	NA:SRCAP	S	2971:3148	AGAPVGGSPGLAKRG:AGAPVGGSPGLAKRG	-0.112931	12.025791876045215	-3.13276	0.00998602	0.10569825824500637	-2.81116	12.06548326880406	12.096927552796188	12.052860357215456	11.921205794212788	11.99358559831877	11.961687439619205	11.976636327807809	12.087634639222944	12.08188050295604	12.066801254027515	12.001163906841626	12.003635870720174
Con_Pmod_vs_Con_Scr	A0A0C4DG62|41	A0A0C4DG62	ARL6IP4	S	41	RNCSASTSQERSKQK	0.010073128708819823	13.614476009152977	0.10641429708271521	0.9172481128333994	0.9673575434187502	-6.48345	13.827652600735204	13.73055007585696	13.722116822723205	13.95718001672131	13.487547010675392	13.865811858045127	13.491373782913165	13.495835100212178	13.559634483074364	13.446373117177693	13.398780968698803	13.39085627300231
Con_Pmod_vs_Con_Scr	A0A0C4DG95|560	A0A0C4DG95	PXK	S	560	PKRNFEESQNL____	0.026732476431055474	15.662597529148673	0.5772444575280473	0.5758732693581823	0.7961820912608099	-6.31407	15.62331766880536	15.541788792157137	15.6409	15.645189556852996	15.635452237369366	15.605583776264895	15.75071333574639	15.6854	15.583733373069862	15.693510132423064	15.735164420621588	15.81040577159672
Con_Pmod_vs_Con_Scr	A0A0D9SEN7|326	A0A0D9SEN7	RUNX2	S	326	TDVPRRISGASELGP	-0.0847479	16.655706163285195	-2.00839	0.0708639	0.2962819925126081	-4.66933	16.54559116777967	16.50201490489797	16.48949473789654	16.46274684448086	16.358011870368486	16.462098443253158	16.870719807529102	16.927640115895816	16.99090570101938	16.808960322576468	16.746895554638204	16.703394489086676
Con_Pmod_vs_Con_Scr	A0A0D9SEY1|643	A0A0D9SEY1	MAP4K4	S	643	SPVSRSHSFSDPSPK	0.0651441	17.29424852298028	1.5075432179637775	0.16098873268220976	0.4409717541845714	-5.39093	17.33262807619657	17.35380477669225	17.35695838893379	17.393967036860765	17.448975010029574	17.395881386290895	17.30226772031266	17.3772	17.223550366478953	17.086438800625665	17.066874120785787	17.192423460073037
Con_Pmod_vs_Con_Scr	A0A0D9SFE4|847	A0A0D9SFE4	DNM1	S	847	PSRKGPASPTRPAAP	-0.0029069	18.2193	-0.0756246	0.9411312814317971	0.9771065687352306	-6.48645	18.381006043730142	18.314895556006636	18.37774244286268	18.31166313923995	18.421155611700776	18.33210458727314	18.035187231178185	17.980694639406178	18.058007434816258	18.160821709161308	18.1721	18.086296794759384
Con_Pmod_vs_Con_Scr	A0A0D9SFE4|849	A0A0D9SFE4	DNM1	T	849	RKGPASPTRPAAPRP	-0.0295077	15.437162677890203	-0.92652	0.37486483992821695	0.653834	-6.04839	15.722249253525732	15.723244216581872	15.734842896069036	15.670430580342794	15.737880297483713	15.683502240133068	15.064113613821826	14.992916615308486	15.075357823386472	15.282001638784756	15.318848004544488	15.24056495470019
Con_Pmod_vs_Con_Scr	A0A0D9SG83|78;81	A0A0D9SG83	TEX46	S;S	78;81	PKTSENDSKNSKAVN;SENDSKNSKAVNTKE	-0.0934359	15.155703933129963	-1.76	0.1072967964961515	0.36093723591977567	-5.04099	15.061842716367194	15.055928724020612	15.12090992339046	14.981620077438889	15.027559836476176	14.949193601515178	15.35405913303557	15.181269518460535	15.161756809873392	15.242325476756715	15.363124064340434	15.368857315884402
Con_Pmod_vs_Con_Scr	A0A0D9SGA5|53	A0A0D9SGA5	SLC12A5	S	53	GEGGGEASPDRQGSL	0.41245093622314855	16.61970836346813	3.8136903772788058	0.00309055	0.0576762	-1.66153	17.19663105094704	17.05223755492632	17.274484759932008	17.628181869061407	17.60955921031427	17.522965095099146	15.657479418789642	15.339517189248758	15.214824137546229	16.15101685534114	16.3537	16.435895527875996
Con_Pmod_vs_Con_Scr	A0A0D9SGE8|156	A0A0D9SGE8	PHF6	S	156	EHELEPSSPKSKKKS	0.022591254940801164	13.882522878210532	0.9181446067587492	0.37903548264446085	0.6573101119386691	-6.05602	13.867393547262616	13.8124	13.840858575370412	13.873898585378596	13.844265065046658	13.870225233429569	13.834012465572163	13.861603659025931	13.8605	13.996954511082256	13.96450749027952	13.963675599676469
Con_Pmod_vs_Con_Scr	A0A0G2JNZ2|1545	A0A0G2JNZ2	SCRIB	T	1545	EAPSPAPTPSPTPVE	0.0626869	16.623452480261157	1.6396871855018718	0.1304849070177002	0.4013984555193761	-5.2117	16.55932155370397	16.540266441942528	16.576611510365712	16.642535705745583	16.607219416085083	16.61450507688941	16.742222608019937	16.590941858216258	16.668884039852067	16.611792408720902	16.69686827399481	16.630260869597606
Con_Pmod_vs_Con_Scr	A0A0G2JNZ2|1566	A0A0G2JNZ2	SCRIB	S	1566	STSPGRLSPDFAEEL	-0.00441454	17.74662438014248	-0.207003	0.8399446112605569	0.9336647468327873	-6.46663	17.82188971151563	17.789029063558544	17.81046719944014	17.8037	17.80156311588979	17.802855141329214	17.673056829506745	17.68978057715664	17.678119912144357	17.705639285948195	17.68826674370713	17.69510087321958
Con_Pmod_vs_Con_Scr	A0A0G2JPU2|202;203	A0A0G2JPU2	CCHCR1	T;S	202;203	EVWLLRETSLQQKMR;VWLLRETSLQQKMRL	0.060335956348950504	16.183846360552295	1.0751575558581197	0.30625461789909986	0.5948554150517268	-5.90339	16.159428030143722	15.937841156286488	16.07608588417462	16.167478607603993	16.052157598843273	16.1347	16.2194	16.314448559131925	16.224464982961784	16.354753178499585	16.24920445419713	16.316194288568006
Con_Pmod_vs_Con_Scr	A0A0J9YXH6:Q6P996:Q6P474|4:4:4	A0A0J9YXH6:Q6P996:Q6P474	LOC124900586:PDXDC1:PDXDC2P	S	04:04:04	____MDASLEKIADP:____MDASLEKIADP:____MDASLEKIADP	-0.04658	15.52973332211251	-0.667958	0.5184918960537468	0.7628202607617799	-6.25584	15.594541343695358	15.311582837110162	15.515424628269487	15.381853432475603	15.49793635500683	15.402018934227389	15.545256573747164	15.68010799447475	15.58892407717092	15.695864155324635	15.554139305046924	15.589150228800884
Con_Pmod_vs_Con_Scr	A0A0J9YXV3|461	A0A0J9YXV3	GREP1	Y	461	DGVEALVYPKAAALA	0.29989497823293476	11.37350388917437	5.037242944248986	4.302542151020649e-4	0.022271982899401004	0.28287135444949474	11.24573393504785	11.117457854556193	11.214877661838788	11.57190484876206	11.400538353708104	11.505311183671472	11.495348547271035	11.520103917177074	11.36036984700746	11.320271649553687	11.295099069390552	11.435029802108147
Con_Pmod_vs_Con_Scr	A0A0U1RQE4|32	A0A0U1RQE4	SH3D19	S	32	RARGRALSGHSAADR	-0.151946	17.48997508025401	-4.66521	7.668877917774936e-4	0.030490719432117213	-0.286483	17.70905575324766	17.653817644946884	17.671451248230372	17.51806672792788	17.526177204421042	17.534242725771634	17.368835406510968	17.467635530725385	17.445731491551797	17.37481703833044	17.29802151142119	17.311848679962836
Con_Pmod_vs_Con_Scr	A0A0U1RQI5|426	A0A0U1RQI5	SORBS1	S	426	PSRSATASPQQPQAQ	0.048138093917471814	7.828582622249122	1.477186118692691	0.16881544832777384	0.4498580958352649	-5.43077	7.828335393280459	7.714358311367285	7.797367125380637	7.86277	7.788755342949488	7.832951972673604	7.811444712136942	7.780218455954497	7.7775686206463615	7.921873651332902	7.914756125212948	7.912593959896641
Con_Pmod_vs_Con_Scr	A0A0U1RRM6|740	A0A0U1RRM6	ENAH	S	740	NTMNGSKSPVISRPK	-0.042088	19.07030854821147	-1.06042	0.31260416870640917	0.6008097912953301	-5.91855	19.36604729581543	19.266794587282533	19.353268197752744	19.29575946559235	19.28633381205246	19.277752808308204	18.72406790382588	18.60158536085944	18.69771535938727	18.993078683957688	19.037014755252613	18.944284348451045
Con_Pmod_vs_Con_Scr	A0A140TA76|173	A0A140TA76	LSM14A	S	173	RSLKTQLSQAEVHKV	-0.00691039	16.68089298268709	-0.0696591	0.9457665205846095	0.9784558407176773	-6.48691	16.954936752458806	16.62811587303347	16.836414057739404	16.959504024090474	16.593222768598785	16.846008713180122	16.641304806715212	16.69501946267003	16.532727189817184	16.510580369193754	16.4142	16.558636974210636
Con_Pmod_vs_Con_Scr	A0A1B0GTK0|249	A0A1B0GTK0	KLHL33	S	249	EAGGCQLSVHRAALA	0.0706954	17.940932320360066	1.9149129547172274	0.0829631	0.3186244993910794	-4.81194	17.872321786960917	17.84510000646518	17.871331611417414	17.908047732029978	17.97280857613166	17.919983342392005	17.9146	18.012254500556203	17.892150549778613	18.031480900482492	17.97962468082963	18.07145086996171
Con_Pmod_vs_Con_Scr	A0A1B0GTL5|1081	A0A1B0GTL5	RAB11FIP5	S	1081	PPSLSSASPPGSRES	-0.0203263	17.65025551173969	-0.950989	0.36286740027145303	0.6443770345308156	-6.02575	17.631129840743164	17.66803626923763	17.642719972440077	17.621244511760878	17.633508536303268	17.626154042031757	17.63334414089284	17.627578057941665	17.635138836175532	17.688192793939763	17.699959405039294	17.6961
Con_Pmod_vs_Con_Scr	A0A1B0GTL5|1194	A0A1B0GTL5	RAB11FIP5	S	1194	EEPQPSASPHPVKPL	-0.132816	20.298705050988808	-2.5626	0.027161909205112772	0.17935827989369113	-3.77516	20.355952405222062	20.370611543691943	20.397129907684853	20.27918570420959	20.213653740257172	20.232406890177607	20.27048272810837	20.055909519426585	20.130621385530503	20.354857978580295	20.490987092827854	20.432661716148857
Con_Pmod_vs_Con_Scr	A0A1B0GTL5|640	A0A1B0GTL5	RAB11FIP5	S	640	ASPTPLASPGKALPE	0.017067402063240422	20.245919823695885	0.451305	0.6608959100762513	0.8490341618497826	-6.38161	20.25258995952304	20.2895	20.28234584709345	20.24628591965531	20.35923060165496	20.27014709912415	20.192187776591503	20.111983557509113	20.200531567405317	20.24269477063489	20.29430266682405	20.209212510706624
Con_Pmod_vs_Con_Scr	A0A1B0GTL5|762	A0A1B0GTL5	RAB11FIP5	S	762	AQLQLRASGSEPDRE	0.11923408603597352	16.336381095933962	3.139993423812519	0.00986051	0.10525602011221163	-2.79885	16.30766277872287	16.29037839582343	16.28301347458435	16.430348895281753	16.37823748523639	16.43017052672043	16.19877215303358	16.150833496497867	16.276052738630472	16.459537273308904	16.46634020159563	16.365225731771858
Con_Pmod_vs_Con_Scr	A0A1B0GTL5|866	A0A1B0GTL5	RAB11FIP5	S	866	APQVQPESPETVSPK	0.0244477	19.33349545183516	0.5151303179603751	0.6170723486220986	0.8234285282866661	-6.34935	19.352855394554428	19.30350629785481	19.317807427958886	19.381571001829435	19.29897237705383	19.36696899117147	19.324721568950153	19.472197494010253	19.32115910496484	19.302434931573707	19.21293783234536	19.346812999754732
Con_Pmod_vs_Con_Scr	A0A1B0GTL5|866;871	A0A1B0GTL5	RAB11FIP5	S;S	866;871	APQVQPESPETVSPK;PESPETVSPKGSEGL	-0.0082098	16.367344515029192	-0.221108	0.8292251199810006	0.9287096202061097	-6.46342	16.40652110403309	16.39337098708461	16.371280820095006	16.376464757856823	16.372290972397934	16.397787766631783	16.223169611306684	16.36339943448614	16.318792312253926	16.442827425330265	16.351224922151985	16.39100406672204
Con_Pmod_vs_Con_Scr	A0A1B0GTL5|871	A0A1B0GTL5	RAB11FIP5	S	871	PESPETVSPKGSEGL	0.030617507185969117	17.82174156419328	0.9542395977030727	0.3612945940398854	0.6432544701006861	-6.0227	17.893835628835678	17.847247994037087	17.882243447971575	17.87284170204784	17.94838967886721	17.893948211487203	17.674335466636894	17.660703955887957	17.724	17.850401660797345	17.839965986033437	17.772994476995944
Con_Pmod_vs_Con_Scr	A0A1B0GTL5|899	A0A1B0GTL5	RAB11FIP5	T	899	DKGLQPSTPPPKPPR	-0.0383956	19.722577172813022	-1.64785	0.1287801956829278	0.39847915932847755	-5.20034	19.784141596706608	19.763594744572863	19.769184548422025	19.756987996030805	19.69985597063606	19.744890161715222	19.63859035492076	19.65171993518286	19.641408591958665	19.744693150021888	19.73120414382379	19.74465487976471
Con_Pmod_vs_Con_Scr	A0A1B0GTL5|913	A0A1B0GTL5	RAB11FIP5	S	913	RLFTPSRSQEEEEEK	-0.0742372	20.55082694663085	-1.61103	0.13662890080261822	0.40898673830553034	-5.25134	20.609480182740405	20.622440485484656	20.603258165757268	20.489125064183177	20.591799064380265	20.53154313455029	20.417299033086177	20.39866773862971	20.53539075494743	20.64815241579906	20.64386822724975	20.518899092761977
Con_Pmod_vs_Con_Scr	A0A1B0GTL5|938	A0A1B0GTL5	RAB11FIP5	S	938	ETEGEDASPSALVVG	-0.0245356	18.48846810527376	-0.968552	0.35442779955867076	0.6363633403157662	-6.00919	18.48336795293587	18.50514439995711	18.490371097290517	18.461362279122422	18.477885019011325	18.46602943080789	18.453206271853336	18.501382552886596	18.441048128632424	18.521590203834847	18.50419912941415	18.556030797538657
Con_Pmod_vs_Con_Scr	A0A1B0GTN4|2	A0A1B0GTN4	DLGAP2	S	2	______MSALRKVLP	0.0496455	13.728184874104722	1.373591401311056	0.19802377475820934	0.48647785340930183	-5.56267	13.699265879664424	13.824500894564771	13.724437088416986	13.828355683999062	13.750852323801665	13.817932486703452	13.660308667283228	13.660570923439357	13.64877280727147	13.677	13.706825860421963	13.739348638817775
Con_Pmod_vs_Con_Scr	A0A1B0GUI1|1083	A0A1B0GUI1	RALGAPA1	S	1083	SPTKRSLSETVTHRA	-0.130811	17.297165278097726	-1.62826	0.13290493393327316	0.40488002029060827	-5.22756	17.387740933423224	17.6674	17.40347147063472	17.316521310674908	17.35628376190526	17.393388942077962	17.193663224649175	17.304279421211376	17.455082771240235	17.083588096495887	17.050826227111887	16.95372133051389
Con_Pmod_vs_Con_Scr	A0A1B0GUI1|1241	A0A1B0GUI1	RALGAPA1	S	1241	SKPKANVSPQRQNRM	0.00677445	14.348373405680062	0.15808081949070013	0.8773752116150932	0.9493598364025801	-6.47616	14.376463850246823	14.318728518836275	14.35458011143544	14.427856841713286	14.265099740097156	14.377139234900724	14.399934619148464	14.3997	14.32545961638943	14.290359111299502	14.285172749983303	14.359961327857537
Con_Pmod_vs_Con_Scr	A0A1B0GUL3|194	A0A1B0GUL3	GSE1	S	194	PPARDAASPHQDGAP	-0.121275	13.7248	-2.60831	0.025069382378968854	0.1727118201473846	-3.69883	13.498061282737956	13.48777101729717	13.482866984937315	13.45671396421683	13.248300619298972	13.399859287471452	14.08881384953321	14.055597135439555	14.024614059175397	13.955371433307496	13.975832169649566	14.024291319651478
Con_Pmod_vs_Con_Scr	A0A1B0GV45|198	A0A1B0GV45	MYO18A	S	198	DSLSRTLSPSLSRAS	-0.111472	14.225923322102645	-1.09635	0.29729707882581435	0.5865847952664102	-5.8813	14.369690847111396	14.103516834833872	14.31071338052742	14.330488059634378	13.937334940249716	14.18168193221241	14.478978978610517	14.26019048713852	14.247613804558766	14.103529399252182	14.182381154429766	14.204960046672806
Con_Pmod_vs_Con_Scr	A0A1B0GV45|211	A0A1B0GV45	MYO18A	S	211	ASGLGRESPDSRLSL	-0.0789239	14.910470149676225	-1.43207	0.18104974018704115	0.4653624672541804	-5.489	14.961347766987071	14.797127451502746	14.912497614211844	14.90563728183629	14.6951	14.833428264905178	15.10620503996376	15.02519315424099	15.023126092469996	14.878637093453106	14.890259831395328	14.897046639946598
Con_Pmod_vs_Con_Scr	A0A1B0GV45|308	A0A1B0GV45	MYO18A	S	308	RSSLEPDSEEDDRKS	-0.132105	15.957404021198146	-3.42399	0.00601791	0.0805643	-2.31644	16.038578409722557	15.924357567391285	15.992882490850368	15.903278947565548	15.784710038139982	15.871514671602029	16.09240254890273	16.050204981588724	16.102316820686514	15.930272988683022	15.920545104179984	15.8778
Con_Pmod_vs_Con_Scr	A0A1B0GV45|338	A0A1B0GV45	MYO18A	S	338	ASIRRSASAADVSRS	-0.188208	20.334530040104692	-2.83515	0.0168294	0.1403334648337282	-3.31679	20.63954526521217	20.474667673230957	20.557367588613015	20.492810737130053	20.195059445727875	20.41908527806248	20.416566658397436	20.37981550885077	20.41651060159133	20.030434998825637	20.00328909935925	19.989207626255343
Con_Pmod_vs_Con_Scr	A0A1B0GV45|92	A0A1B0GV45	MYO18A	S	92	SLSERAASPERPPRK	0.051967395222028756	12.063365571529811	0.2560735530994739	0.8028133996201647	0.916311	-6.45454	11.798999276936664	11.636352342574138	11.5516	11.73742753320029	11.57826177342574	11.827119973079071	11.76877533747132	12.66432817728174	12.30064047505633	12.919292065896288	12.32542708715163	12.652207341756313
Con_Pmod_vs_Con_Scr	A0A1B0GV68|549	A0A1B0GV68	FARP1	S	549	GRRASPHSAKSSRPP	-0.0526425	14.788778746245423	-0.622155	0.5470371025340992	0.7807804749097222	-6.28623	14.951997983303093	14.610248983489548	14.890762388380692	14.839842716445336	14.704239265936057	14.750999724180032	14.818341826700928	14.770010068370532	14.608306723194737	14.819379575281026	14.794410534172666	14.906805165490432
Con_Pmod_vs_Con_Scr	A0A1B0GV68|583	A0A1B0GV68	FARP1	S	583	PRLPRHSSLIDEMFK	-0.0344964	19.10770533192205	-1.28617	0.22586814075803258	0.5166299490949456	-5.66881	19.248229387752097	19.251741403831858	19.253573789403067	19.179145954109117	19.267185232712976	19.203724260572812	18.905347249504675	18.923946677692587	18.93481682173998	19.055513754938502	19.043918872475206	19.025320578331712
Con_Pmod_vs_Con_Scr	A0A1B0GV68|625	A0A1B0GV68	FARP1	S	625	TGSQGYVSENGHDHR	-0.189249	12.574026399095837	-1.6568	0.1269349575794192	0.39601546680414407	-5.18785	12.484374926211906	12.84458636667311	12.68231959358113	12.388936092341336	12.64374645098242	12.410851245917062	12.695292874512402	12.588251794207457	12.421269726179188	12.39975610133559	12.591975293873526	12.736956323334914
Con_Pmod_vs_Con_Scr	A0A1B0GV68|787	A0A1B0GV68	FARP1	S	787	SLLRSRGSLGGLRLS	-0.0754371	21.121684753024415	-1.58848	0.14164264069590457	0.41503942482749706	-5.28225	21.368623185845593	21.202518531812217	21.28963673288636	21.234308571082273	21.16965055511191	21.230508134801543	20.94692978447503	21.020491080842383	21.041200271237376	21.05711419371919	20.962443191589557	20.936792802889556
Con_Pmod_vs_Con_Scr	A0A1B0GV70|203	A0A1B0GV70	TEPSIN	S	203	AMRPGPESPSTRRLL	0.012088810231352554	14.963520905649228	0.17849531517533368	0.8617119657796797	0.9430203254817859	-6.47249	15.076238571117292	14.763434744265243	14.989587907957173	15.0208	14.884444927071588	14.960282311526774	15.018505538651276	15.010022880853237	14.948729648628357	14.99356867582238	14.93177051100731	14.964864735454702
Con_Pmod_vs_Con_Scr	A0A1B0GW05|25	A0A1B0GW05	DPY19L1	S	25	QPPRASQSPLRGASD	-0.039664	16.976258165375455	-0.712277	0.49172999105470283	0.7452165191644177	-6.22456	16.987865235795628	16.975582516099728	16.95127617041818	16.92293871938105	16.922415802039662	16.95037740146151	16.997954868605127	16.969640401772406	17.163551850577388	17.022599805287143	17.007108541204985	16.843786671862635
Con_Pmod_vs_Con_Scr	A0A1B0GW05|46	A0A1B0GW05	DPY19L1	S	46	GPERAPLSPGRKGAA	-0.164785	18.706100785403102	-2.06253	0.0646347	0.2840527044314921	-4.5854	18.8497	19.079362048347814	18.890131775255227	18.713155716885733	18.828415756561625	18.78326579597497	18.363724038846996	18.301015882726222	18.557802413471848	18.731592990138612	18.78955027915339	18.585493516150265
Con_Pmod_vs_Con_Scr	A0A1B0GWE0|523	A0A1B0GWE0	DOCK7	S	523	GQLERSPSGSAFGSQ	-0.0637689	12.379072811134277	-1.29662	0.2223770339403449	0.5123809799323606	-5.65638	12.429906001606897	12.329545818129274	12.446631060315855	12.310538242507246	12.402917120293356	12.301320674401907	12.39534046906736	12.233925863690397	12.30912147986788	12.44199514549578	12.518050816794185	12.429581041441178
Con_Pmod_vs_Con_Scr	A0A1B0GX49|73	A0A1B0GX49	TRBV6-4	T	73	HYSNTAGTTGKGEVP	0.20871829828100275	15.804277346895454	2.437920960556291	0.033784761335807496	0.20382031518860097	-3.98188	15.474218386931264	15.6159	15.509089456773458	15.59426868377968	15.920994726856744	15.7101	15.937086663574592	15.978032191881356	16.146650494953427	15.985392241947142	15.971074069832088	15.808513578922591
Con_Pmod_vs_Con_Scr	A0A1C7CYX9|25	A0A1C7CYX9	DPYSL2	S	25	AFFKNLGSGSPKPRQ	-0.122744	23.003907191416634	-1.31623	0.21595015402266896	0.5063596878499869	-5.63287	23.058312065269508	23.130036296840437	23.12830806265533	22.792719207389005	23.252070190218227	22.903636276606207	22.645717647996797	22.61966339403792	22.713118208904724	23.28930161306249	23.31949571599129	23.19450761802767
Con_Pmod_vs_Con_Scr	A0A1C7CYX9|27	A0A1C7CYX9	DPYSL2	S	27	FKNLGSGSPKPRQKF	-0.0342872	27.013145500970708	-0.55799	0.5884843860005862	0.8041401547834096	-6.32541	27.10911231678712	26.97591381964599	27.10560490976856	26.935444305991854	27.17382144827206	26.978503686600977	26.769539653752258	26.721546512743306	26.79053625871255	27.236148633063785	27.23139376029597	27.13018070601408
Con_Pmod_vs_Con_Scr	A0A1C7CYX9|56	A0A1C7CYX9	DPYSL2	S	56	TIDFDSLSVGRGSGQ	0.10245663144154094	24.654542973494216	2.0935894754741975	0.0612979	0.2772898643410409	-4.53684	24.83259742236067	24.795618615902036	24.827216600960824	24.83433102922448	25.036955902931687	24.89151560139199	24.328489254830565	24.43345951682612	24.400583841130803	24.537437967823557	24.46711243340974	24.469197495138125
Con_Pmod_vs_Con_Scr	A0A1C7CYX9|612	A0A1C7CYX9	DPYSL2	S	612	DGPVCEVSVTPKTVT	-0.037465	11.24101225894091	-0.960246	0.35840140481839544	0.6402623553393991	-6.01705	11.17129222607598	11.29809136369497	11.20474934588293	11.182588459136245	11.188075367716335	11.191074101514191	11.210609574816097	11.27832431583314	11.191643191719354	11.2974	11.295716231146624	11.382624420037132
Con_Pmod_vs_Con_Scr	A0A1C7CYX9|617	A0A1C7CYX9	DPYSL2	T	617	EVSVTPKTVTPASSA	0.0190264	13.02612696066374	0.5290840708964589	0.6076883853578035	0.8169351957147374	-6.34175	12.85546147198324	12.98351402958512	12.90424030586254	12.898803498734202	12.979949596865142	12.921541948017133	13.080350757599778	13.042327921923906	13.077824537369752	13.163592075452293	13.216090249171884	13.189827135399886
Con_Pmod_vs_Con_Scr	A0A1W2PQU4|705	A0A1W2PQU4	KCNMA1	T	705	LEDEQPSTLSPKKKQ	-0.0390319	14.131964588983344	-0.694092	0.5026073019882292	0.7528494038593043	-6.23762	14.206325416540942	14.23124056788351	14.21926479376406	14.149604863929056	14.218816331138854	14.171313920146805	13.948618025548642	13.80374355518543	14.015550906495283	14.220439827333742	14.292040805924604	14.1066
Con_Pmod_vs_Con_Scr	A0A1W2PQU4|707	A0A1W2PQU4	KCNMA1	S	707	DEQPSTLSPKKKQRN	0.00336868	14.51683507668987	0.15603168990306918	0.8789505971471997	0.9505207448236684	-6.4765	14.556189517780716	14.569613780971888	14.550946694714618	14.5641	14.55394471808004	14.568794971855771	14.399155668321784	14.409653266798964	14.430119189638916	14.5429	14.535340635970764	14.521236199856595
Con_Pmod_vs_Con_Scr	A0A1W2PRV2:P17096|8:8	A0A1W2PRV2:P17096	C2orf81:HMGA1	S	08:08:00	MSESSSKSSQPLASK:MSESSSKSSQPLASK	0.0619446	11.574435770248646	0.5686997107899936	0.5814518239476216	0.799718	-6.31915	11.4117	11.281206186542695	11.383891897720066	11.519946299010698	11.29937278223331	11.443311721417622	11.780785897445456	11.379210685208813	11.74942390403548	11.865566496171358	12.042569128675904	11.73624531602475
Con_Pmod_vs_Con_Scr	A0A1W2PS85:P28715|382:157	A0A1W2PS85:P28715	BIVM-ERCC5:ERCC5	S	382:157	QEEEKHSSEEEDEKE:QEEEKHSSEEEDEKE	-0.0256054	11.265988551227816	-0.344202	0.7374499911254957	0.8836492467428647	-6.42649	11.197568499638567	11.076053245967293	11.215398506045538	11.10230016182592	11.214916265472526	11.094987661135766	11.39431372980427	11.124030870156451	11.328480874655666	11.466068134962628	11.590610849302536	11.387133815766616
Con_Pmod_vs_Con_Scr	A0A1W2PS85:P28715|566:341	A0A1W2PS85:P28715	BIVM-ERCC5:ERCC5	S	566:341	EPDATPPSPRTLLAM:EPDATPPSPRTLLAM	-0.00832999	19.528652817411317	-0.250089	0.8073163821880115	0.9187503457597913	-6.45615	19.475538595467185	19.417830408174524	19.47607761587571	19.429321672814247	19.483422589951108	19.43171239240406	19.567454158832582	19.48377474139812	19.557706402665307	19.677445115513944	19.70991970177507	19.633630414063944
Con_Pmod_vs_Con_Scr	A0A1W2PS85:P28715|609:384	A0A1W2PS85:P28715	BIVM-ERCC5:ERCC5	S	609:384	AVDEGSISPRTLSAI:AVDEGSISPRTLSAI	0.056796734656693104	18.392954740501455	1.197075710002419	0.25745773711535447	0.5482242506731213	-5.77173	18.37745357840235	18.172776077240083	18.336441552430205	18.38451407198272	18.32843738689246	18.34410995316755	18.473231046280077	18.39359864983101	18.40203736111337	18.50719270574298	18.510108351204753	18.48555615172991
Con_Pmod_vs_Con_Scr	A0A1W2PS85:P28715|751:526	A0A1W2PS85:P28715	BIVM-ERCC5:ERCC5	S	751:526	GRELTPASPTCTNSV:GRELTPASPTCTNSV	0.0764207	17.140745565015106	0.9701556723706906	0.35366412647382395	0.6359305911257971	-6.00767	17.1312	16.870755920326665	17.021901389591633	17.199507023993878	16.927117062954892	17.126462573061616	17.1545	17.25660276374493	17.128660900358675	17.331066045930548	17.214047221592676	17.327175923493076
Con_Pmod_vs_Con_Scr	A0A1W2PS85:P28715|787:562	A0A1W2PS85:P28715	BIVM-ERCC5:ERCC5	S	787:562	KFDSSLLSSDDETKC:KFDSSLLSSDDETKC	0.029571245533073665	16.410864741708263	0.8514345714701859	0.41341843232874187	0.6853960445540558	-6.11471	16.312746510592866	16.20956257746578	16.29987764033239	16.30984944229648	16.30832047900963	16.292730543684147	16.564943766775063	16.471754090051565	16.528727322585027	16.54445592174523	16.57408459042594	16.51332401553503
Con_Pmod_vs_Con_Scr	A0A1W2PS85:P28715|930:705	A0A1W2PS85:P28715	BIVM-ERCC5:ERCC5	S	930:705	ESLLRDNSERDDVDG:ESLLRDNSERDDVDG	0.040385007245069104	14.555136874174126	0.7507385758398252	0.46920785635072293	0.7261549192172897	-6.19595	14.473733942927051	14.324579108771298	14.471220659921707	14.49660184634044	14.451090029458513	14.44299685755631	14.746229352158446	14.680795015431306	14.56596533985264	14.623797791270343	14.650756246467202	14.73387629993426
Con_Pmod_vs_Con_Scr	A0A2Q3DQE3|325	A0A2Q3DQE3	CAMK2G	S	325	KSLLNKKSDGGVKPQ	-0.0142111	9.809341761259562	-0.289378	0.7778937205766847	0.9052452712344388	-6.44489	9.493600417450388	9.676256154574329	9.551534468521409	9.492162572787532	9.643303152182028	9.543292070392924	9.99942	10.060512646066936	10.031878127308294	10.057608190890786	10.067636855503936	10.09489459584953
Con_Pmod_vs_Con_Scr	A0A2R8Y4Z6|325	A0A2R8Y4Z6	INTS2	Y	325	QVRVKYLYRLRIRIL	0.11403584391647392	15.332258122495015	3.7882440067990792	0.00322646	0.0591518	-1.70392	15.372782218163358	15.280873289656046	15.342674760730754	15.474762261165662	15.410954395029338	15.452721144104578	15.178534407600962	15.198091067702382	15.15659080345274	15.382088951565798	15.35219171595477	15.38483245481378
Con_Pmod_vs_Con_Scr	A0A2R8Y4Z8|521	A0A2R8Y4Z8	CCDC9	S	521	THLAGALSPGGGQSA	0.0342686	18.646798179893825	1.28734	0.22547445302832103	0.5166225967668525	-5.66742	18.61276656330163	18.59917119277126	18.60492357770314	18.648433520959394	18.62793408012382	18.64329947838638	18.620957321372863	18.677132096326687	18.607396402054484	18.70677669877321	18.67618691400507	18.736600312947953
Con_Pmod_vs_Con_Scr	A0A2R8Y5V8|30	A0A2R8Y5V8	FRY	S	30	YKSSRRSSLPPELLI	-0.100789	20.85643959204337	-1.22209	0.248248	0.5386055795702761	-5.74338	20.61733070222744	20.93658252041843	20.685509662545137	20.54719314324496	20.748208952343376	20.64165449967789	20.978157498876936	21.183533406192232	21.11368076850261	20.94909032553548	20.901109708757932	20.9752
Con_Pmod_vs_Con_Scr	A0A2R8Y626|31;40	A0A2R8Y626	HK1	S;S	31;40	PRPRRRWSWPQPCVP;PQPCVPASARRLRCL	-0.188718	11.838485633500254	-3.65168	0.00406966	0.0663204	-1.9324	11.968446760035391	11.861670053296518	11.968140522518718	11.671026899875176	11.858375297886417	11.70270233299453	11.883497346249989	11.823535907777478	11.893877226650911	11.835906520745358	11.844201562607202	11.750447171365348
Con_Pmod_vs_Con_Scr	A0A2R8Y6D0|345	A0A2R8Y6D0	EPB41	S	345	AVDSADRSPRPTSAP	0.0076255	17.113906565642978	0.23273843662417065	0.8204134876531657	0.925699	-6.46061	17.04787225239905	17.12557050360535	17.092543266992273	17.06968898982912	17.140312823938945	17.078860695196678	17.154064532565375	17.082150953342044	17.11326396932618	17.120668992512755	17.184782275601894	17.157099532406086
Con_Pmod_vs_Con_Scr	A0A2R8Y6H1:O00400|22:22	A0A2R8Y6H1:O00400	NA:SLC33A1	S	22:22:00	RPGNFSHSLDMKSGP:RPGNFSHSLDMKSGP	-0.15067	14.510563702612238	-2.21945	0.049379607670376545	0.247471	-4.33725	14.51383437370876	14.756309348072966	14.596915369886425	14.360217885118882	14.613834095339234	14.440997371456133	14.548043319344131	14.58450067148082	14.612343825504766	14.35246949248248	14.386656754372876	14.36064192457939
Con_Pmod_vs_Con_Scr	A0A2R8YDH4:Q9UDY2|1090:961	A0A2R8YDH4:Q9UDY2	NA:TJP2	S	1090:961	EPVQHEESIRKPSPE:EPVQHEESIRKPSPE	0.1465358315724501	18.316761291326454	1.912592768127129	0.0832865	0.31928927653173694	-4.81544	18.28526428091958	18.224688931430165	18.23272316754929	18.293589514157414	18.50373899627366	18.384955364185313	18.2703	18.415568579633177	18.52393764747335	18.3458	18.219240371110207	18.10140652820778
Con_Pmod_vs_Con_Scr	A0A2R8YDH4:Q9UDY2|1095:966	A0A2R8YDH4:Q9UDY2	NA:TJP2	S	1095:966	EESIRKPSPEPRAQM:EESIRKPSPEPRAQM	-0.0763989	17.789874574393288	-0.952514	0.36212909965079343	0.644085	-6.02432	17.532499759243763	17.27775471882236	17.497384756616952	17.399936927011215	17.336378295723097	17.342127313445268	18.20030715053231	17.924306785768707	18.1044	18.28236245866344	18.37897912577134	18.202034587196184
Con_Pmod_vs_Con_Scr	A0A2R8YDH4:Q9UDY2|1107:978	A0A2R8YDH4:Q9UDY2	NA:TJP2	S	1107:978	AQMRRAASSDQLRDN:AQMRRAASSDQLRDN	-0.0526632	15.54778781519984	-1.30109	0.22089956822102869	0.5107068892526785	-5.65104	15.32832491739676	15.414147467532818	15.353050405253809	15.281033714340182	15.348491077581771	15.30800831236412	15.713106952840128	15.646355255976047	15.771848097946718	15.806679017959851	15.853614291107675	15.748794272098188
Con_Pmod_vs_Con_Scr	A0A2R8YDH4:Q9UDY2|1108:979	A0A2R8YDH4:Q9UDY2	NA:TJP2	S	1108:979	QMRRAASSDQLRDNS:QMRRAASSDQLRDNS	0.0226316	9.674783290211726	0.47487010371520966	0.6445480726165289	0.8390908646790886	-6.37017	9.506368403324148	9.571405273028589	9.500464980786516	9.483615737172848	9.615491594674566	9.547026076735404	9.716381024335028	9.838186594173305	9.86658	9.873143491556013	9.8039	9.77483
Con_Pmod_vs_Con_Scr	A0A2R8YDH4:Q9UDY2|1115:986	A0A2R8YDH4:Q9UDY2	NA:TJP2	S	1115:986	SDQLRDNSPPPAFKP:SDQLRDNSPPPAFKP	0.00920841	14.662007482317362	0.2741160045898223	0.7892828906005731	0.9111874728030974	-6.44946	14.493874583029744	14.572988072791764	14.512810559996916	14.548388149379877	14.515520228006832	14.543390055628812	14.7336	14.784867058468564	14.704285056926938	14.820268889577804	14.81663045084326	14.897423324603032
Con_Pmod_vs_Con_Scr	A0A2R8YDH4:Q9UDY2|1156:1027	A0A2R8YDH4:Q9UDY2	NA:TJP2	T	1156:1027	SAVAGNETPGASTKG:SAVAGNETPGASTKG	0.0547101	12.541574548575573	0.8032876192981652	0.43951439766523204	0.7060472251650314	-6.15468	12.567348567237383	12.44790285756114	12.532767580317236	12.580104331377832	12.565808776173366	12.566236213964036	12.55046055543105	12.745756566608044	12.484191604983062	12.495015162853605	12.375949262809756	12.587353103590363
Con_Pmod_vs_Con_Scr	A0A2R8YDH4:Q9UDY2|1196:1067	A0A2R8YDH4:Q9UDY2	NA:TJP2	S	1196:1067	EGEEVGESSEEQDNA:EGEEVGESSEEQDNA	0.0098452	13.543647209793667	0.23183926212734346	0.8210938252033145	0.925779	-6.46083	13.496439769626654	13.392641928682236	13.488944155264056	13.472546731435312	13.480275379870076	13.454739339856802	13.534829580699643	13.395531951767294	13.495157556566332	13.767646657862594	13.82180147926106	13.723211986631949
Con_Pmod_vs_Con_Scr	A0A2R8YDH4:Q9UDY2|1247:1118	A0A2R8YDH4:Q9UDY2	NA:TJP2	Y	1247:1118	AQKHPDIYAVPIKTH:AQKHPDIYAVPIKTH	0.0889508	14.722983663634457	1.2071152524799922	0.2537299876493318	0.544149	-5.7604	14.735930466519411	14.72934736218257	14.72600158397854	14.731314081079816	14.930646622965376	14.796170990755572	14.52388669773183	14.803440074491183	14.590663085816988	14.75132584477999	14.59858408404389	14.758493069268312
Con_Pmod_vs_Con_Scr	A0A2R8YDH4:Q9UDY2|1288:1159	A0A2R8YDH4:Q9UDY2	NA:TJP2	S	1288:1159	DTRGSYGSDAEEEEY:DTRGSYGSDAEEEEY	-0.00192462	14.513285252699992	-0.0678565	0.9471675480372738	0.9793197776298237	-6.48705	14.35308566680872	14.426639008119224	14.376023374962946	14.358612604523652	14.412952519997429	14.378409063113596	14.596349590507144	14.574302644197378	14.62371800354184	14.68269213312604	14.708396217729868	14.668242205772067
Con_Pmod_vs_Con_Scr	A0A2R8YDH4:Q9UDY2|1311:1182	A0A2R8YDH4:Q9UDY2	NA:TJP2	S	1311:1182	KRGYYGQSARYRDTE:KRGYYGQSARYRDTE	0.14959910917903585	16.41308607296724	1.0865086543301021	0.3014314381198626	0.5905518583193838	-5.8916	16.606605591751297	16.853005783349595	16.530144750363156	16.999225234485422	16.480512020664705	16.958816197851025	16.2351	16.550360213882946	16.453142028652376	15.806154655828037	15.653538091134418	15.830474129681209
Con_Pmod_vs_Con_Scr	A0A2R8YDH4:Q9UDY2|259:130	A0A2R8YDH4:Q9UDY2	NA:TJP2	S	259:130	QVAALQASPPLDQDD:QVAALQASPPLDQDD	0.020238514712715983	16.846830332107007	0.4358734374921075	0.6717040399849312	0.8539797077292465	-6.3888	16.761926627172233	16.639709515098875	16.748293775347392	16.767646244785666	16.71566544187123	16.72733377509975	17.020082090475277	17.027567837638298	16.895206163890347	16.927535727370955	16.913872438761285	17.01712434777276
Con_Pmod_vs_Con_Scr	A0A2R8YDH4:Q9UDY2|288:159	A0A2R8YDH4:Q9UDY2	NA:TJP2	S	288:159	RSGYSERSRLNSHGG:RSGYSERSRLNSHGG	-0.152437	17.25209745741383	-2.07799	0.0629525	0.2804708865337219	-4.56126	16.953580348525843	17.10294413319568	17.06655841202254	16.81363756547128	17.019133027397324	16.83300127301828	17.479715722400368	17.25598417890563	17.34999116543434	17.62917856344725	17.806774720169106	17.714670378978283
Con_Pmod_vs_Con_Scr	A0A2R8YDH4:Q9UDY2|292:163	A0A2R8YDH4:Q9UDY2	NA:TJP2	S	292:163	SERSRLNSHGGRSRS:SERSRLNSHGGRSRS	-0.0720389	15.229486590212101	-0.938492	0.36896	0.6491962576566739	-6.03737	15.042186292915364	15.272938425944137	15.124111973725086	14.941732890451409	15.24670193415082	15.034685281349248	15.209824477558524	15.342742124624632	15.263524830342217	15.416161746529394	15.400519394675856	15.45870971027852
Con_Pmod_vs_Con_Scr	A0A2R8YDH4:Q9UDY2|299:170	A0A2R8YDH4:Q9UDY2	NA:TJP2	S	299:170	SHGGRSRSWEDSPER:SHGGRSRSWEDSPER	0.0630593	13.770809062407002	2.3910986508729097	0.0366606	0.2120339624666243	-4.05885	13.58263893364394	13.636886845867997	13.600414378995447	13.638783464673049	13.708551746158191	13.661782925074382	13.846797729701304	13.85290090416088	13.874109852294092	13.950978968539069	13.957869607945698	13.937993391829968
Con_Pmod_vs_Con_Scr	A0A2R8YDH4:Q9UDY2|299;303:170;174	A0A2R8YDH4:Q9UDY2	NA:TJP2	S;S	299;303:170;174	SHGGRSRSWEDSPER;RSRSWEDSPERGRPH:SHGGRSRSWEDSPER;RSRSWEDSPERGRPH	0.021717983093783033	12.839936323667533	0.6298241457929911	0.542196	0.7772575623374338	-6.28128	12.706156666484558	12.741065804250052	12.734250537315598	12.757272104442972	12.748404552515083	12.740950300373504	12.961324339027426	12.959497630288704	12.868409244821532	12.910896670367576	12.93522480608155	13.015783228041846
Con_Pmod_vs_Con_Scr	A0A2R8YDH4:Q9UDY2|303:174	A0A2R8YDH4:Q9UDY2	NA:TJP2	S	303:174	RSRSWEDSPERGRPH:RSRSWEDSPERGRPH	0.0353747	13.390754150377337	0.730369	0.4810533839032848	0.7363915884869952	-6.21127	13.23443919266212	13.34357203011405	13.242322648523414	13.244136048661526	13.374529349824314	13.307792538850933	13.393326258505654	13.53000005883088	13.527782986107418	13.539069250884218	13.475177928145223	13.476901513418294
Con_Pmod_vs_Con_Scr	A0A2R8YDH4:Q9UDY2|321:192	A0A2R8YDH4:Q9UDY2	NA:TJP2	S	321:192	RSRERDLSRDRSRGR:RSRERDLSRDRSRGR	0.17254081112279707	5.179214976453853	3.965158306167536	0.00239577	0.0520491	-1.41055	4.899510458807006	4.999261691258845	4.93403	5.156329652647324	5.066900719987473	5.127189880814413	5.323823243759509	5.316273646781875	5.231897556335015	5.3075379288451785	5.34823	5.4396
Con_Pmod_vs_Con_Scr	A0A2R8YDH4:Q9UDY2|361:232	A0A2R8YDH4:Q9UDY2	NA:TJP2	S	361:232	LDHDFGPSRDRDRDR:LDHDFGPSRDRDRDR	0.0600408	8.55629	0.6198143179954747	0.5485197501809409	0.781083	-6.28773	8.427833377597594	8.54509	8.452560717465023	8.608911415475955	8.435213114793536	8.561480751322913	8.611044192538241	8.802615203955003	8.461275956993202	8.516276649376245	8.46552	8.787633940981237
Con_Pmod_vs_Con_Scr	A0A2R8YDH4:Q9UDY2|373:244	A0A2R8YDH4:Q9UDY2	NA:TJP2	S	373:244	RDRSRGRSIDQDYER:RDRSRGRSIDQDYER	-0.041283	17.798083757403937	-1.70478	0.11743505149674137	0.37956480895126987	-5.12018	17.674503544675048	17.74190419382773	17.690682104784987	17.649931295462764	17.671040538458815	17.662268943682445	17.89395907310736	17.900930545870718	17.913482685210077	17.921445886004744	17.931166169924456	17.925690107838097
Con_Pmod_vs_Con_Scr	A0A2R8YDH4:Q9UDY2|395:266	A0A2R8YDH4:Q9UDY2	NA:TJP2	S	395:266	PDYERAYSPEYRRGA:PDYERAYSPEYRRGA	0.00968474	14.51135257784294	0.3402712329694008	0.7403241506032079	0.8848495823942724	-6.42791	14.390116428047255	14.463187467570402	14.409584592832775	14.40345893599578	14.46252218890287	14.425961588681968	14.553760628389371	14.606108360011287	14.573213574049737	14.613927242774798	14.602383614305728	14.632006312553315
Con_Pmod_vs_Con_Scr	A0A2R8YDH4:Q9UDY2|398:269	A0A2R8YDH4:Q9UDY2	NA:TJP2	Y	398:269	ERAYSPEYRRGARHD:ERAYSPEYRRGARHD	0.029658326823085446	10.78921811231739	0.9200013528144554	0.3781080958370997	0.6563686040307359	-6.05433	10.62776164059241	10.698433510347478	10.636835919729918	10.66880227952352	10.693502400513603	10.68970137110194	10.898613056816718	10.879568040946817	10.967057769433245	10.915620962023937	10.93164049812573	10.863079898653346
Con_Pmod_vs_Con_Scr	A0A2R8YDH4:Q9UDY2|421:292	A0A2R8YDH4:Q9UDY2	NA:TJP2	S	421:292	RSREHPHSRSPSPEP:RSREHPHSRSPSPEP	0.0740227	6.366995382447913	1.0311342128466092	0.3255150349237709	0.6127242585746943	-5.94817	6.217487250847705	6.072880675731331	6.218682857386833	6.3075	6.193944089985231	6.229673188970643	6.523853126917511	6.479781983487188	6.280432613095999	6.555213087907532	6.580984720263776	6.743509255071757
Con_Pmod_vs_Con_Scr	A0A2R8YDH4:Q9UDY2|454:325	A0A2R8YDH4:Q9UDY2	NA:TJP2	S	454:325	EYGLRLGSQIFVKEM:EYGLRLGSQIFVKEM	0.10329945289170084	14.123218772011725	1.3923627814442474	0.19243498503876869	0.47954347791424323	-5.53925	14.111678315706316	14.100798590944915	14.105325676974251	14.293217829867457	14.102773265913502	14.231709846519616	14.174617932532977	14.27932002488872	14.03062001699418	13.964273049340395	13.926674342644429	14.157616371813956
Con_Pmod_vs_Con_Scr	A0A2R8YDH4:Q9UDY2|544:415	A0A2R8YDH4:Q9UDY2	NA:TJP2	S	544:415	IESNRSFSPEERRHQ:IESNRSFSPEERRHQ	-0.01838	12.061317165156169	-0.386922	0.7064968668830538	0.8711515715792282	-6.41	11.741096069200438	11.909957721999168	11.792014196644669	11.726455388488995	11.880390647031115	11.781081932988377	12.191608307373317	12.221193540390384	12.252731371810318	12.40929057260363	12.427709800870009	12.4023
Con_Pmod_vs_Con_Scr	A0A2R8YDH4:Q9UDY2|569:440	A0A2R8YDH4:Q9UDY2	NA:TJP2	S	569:440	EKLKERPSSREDTPS:EKLKERPSSREDTPS	0.00639477	8.878664031475545	0.1364102628911326	0.894063	0.9567890165988446	-6.47956	8.61632	8.761648187787902	8.642451866605379	8.664267921058798	8.684059945458085	8.691277817765481	8.955133394644378	8.903150426743514	9.045542881897273	9.197424557088947	9.24456	9.138128108847324
Con_Pmod_vs_Con_Scr	A0A2R8YDH4:Q9UDY2|570:441	A0A2R8YDH4:Q9UDY2	NA:TJP2	S	570:441	KLKERPSSREDTPSR:KLKERPSSREDTPSR	0.10030272629723846	11.961121387808511	2.164754932337327	0.0542583	0.2593930537213319	-4.42451	11.747503362995436	11.761693206872636	11.77050429911083	11.770350070377027	11.986466272921088	11.8238	12.043907243925563	12.100770174361433	12.072971283121372	12.16886345942492	12.143035801290386	12.143598774728943
Con_Pmod_vs_Con_Scr	A0A2R8YDH4:Q9UDY2|576:447	A0A2R8YDH4:Q9UDY2	NA:TJP2	S	576:447	SSREDTPSRLSRMGA:SSREDTPSRLSRMGA	-0.089344	11.62071743095111	-3.37713	0.00652624	0.0850046	-2.39586	11.67668702901151	11.754577376582688	11.68769676474762	11.618028312213736	11.606450838466976	11.626450164225016	11.62118705551827	11.65890685099643	11.645921646046258	11.513935387073726	11.508605023539952	11.530162722991134
Con_Pmod_vs_Con_Scr	A0A2R8YDH4:Q9UDY2|579:450	A0A2R8YDH4:Q9UDY2	NA:TJP2	S	579:450	EDTPSRLSRMGATPT:EDTPSRLSRMGATPT	-0.0349882	15.204134513494537	-0.891685	0.39242527672508554	0.6676180909029656	-6.07975	15.383584077270678	15.287251703850856	15.380841419779625	15.279134457417538	15.381298623908318	15.286279429362386	15.148560454715042	15.18420707053489	15.094306863470724	15.010384953172236	14.980274455235326	15.033490653216836
Con_Pmod_vs_Con_Scr	A0A2R8YDH4:Q9UDY2|590:461	A0A2R8YDH4:Q9UDY2	NA:TJP2	S	590:461	ATPTPFKSTGDIAGT:ATPTPFKSTGDIAGT	-0.100918	22.318512209673273	-1.59631	0.1398824930737521	0.41257167784006377	-5.27154	22.581393331251512	22.70975083719513	22.566352478526795	22.460605437935374	22.55773660868425	22.536399226141288	22.01922325603048	22.23597550415702	22.234836718565404	22.04694013308389	21.932021339820498	21.940911644687645
Con_Pmod_vs_Con_Scr	A0A2R8YDH4:Q9UDY2|831:702	A0A2R8YDH4:Q9UDY2	NA:TJP2	S	831:702	VKKNLRKSREDLTAV:VKKNLRKSREDLTAV	0.012744650802082091	15.555995503291776	0.33775689062067354	0.7421646089661789	0.8855380530291307	-6.42882	15.44320971052096	15.57540884971404	15.476957921947124	15.473522316100862	15.551917411925205	15.508370706562298	15.55790345038095	15.553393052046903	15.617104447643916	15.636813794184624	15.662724548916987	15.61461982955743
Con_Pmod_vs_Con_Scr	A0A3B3IRS5|457	A0A3B3IRS5	FOXP1	Y	457	IAQNQEFYKNAEVRP	0.0596981	14.906596555107031	2.382098372563678	0.0372401	0.21391180424301642	-4.0736	14.896044212359076	14.94526530790806	14.904881581241114	14.96098886413974	14.987886984235466	14.97640968257238	14.845446148744532	14.840080317321934	14.884766462104723	14.885079641214146	14.893742996000956	14.858566463442251
Con_Pmod_vs_Con_Scr	A0A3B3IRT3|492	A0A3B3IRT3	TBC1D4	S	492	SPLLRQSSSEQCSDG	-0.184351	19.21279888619105	-1.48365	0.1671215716354013	0.4476387664679271	-5.42233	19.464736725168137	19.35377518969864	19.356576568321582	19.406290405235936	18.907375497390845	19.30836824970425	19.119024359548707	18.903593237231817	19.241981988310226	19.208397495358223	19.26175813100913	19.021708787315102
Con_Pmod_vs_Con_Scr	A0A3B3ITE4|7	A0A3B3ITE4	ZNF23	T	7	_MAAMHLTAWPQKSV	-0.11787	20.874070487184166	-1.18842	0.2607052843451497	0.5516930153549545	-5.78143	20.9231	20.86964177206153	20.97122608630754	20.84836313469423	20.788512062340043	20.773458005293392	20.956327135783397	20.968444596902287	20.62154852628405	20.802914536491645	20.83755604501982	21.127779819159855
Con_Pmod_vs_Con_Scr	A0A494BZV2|1223	A0A494BZV2	MPRIP	S	1223	LRKFASESPKDMEEP	-0.0255409	14.693459289371978	-0.529304	0.6075412430974787	0.8168299535715042	-6.34163	14.63599829428602	14.63783263098563	14.618138863861054	14.5496	14.664417426368155	14.601365354573185	14.616664764906808	14.6495	14.764773569286229	14.92274127911593	14.884504642208242	14.776035756574675
Con_Pmod_vs_Con_Scr	A0A494BZV2|402	A0A494BZV2	MPRIP	S	402	ERRTRARSPGREEVA	0.0585086	12.16755209664148	0.9001310754275197	0.3881159504559525	0.6645200180410826	-6.07224	12.00425227151552	11.839	11.962164897933407	12.078658497963133	11.895369475035174	12.006868668759584	12.371116850107942	12.4047	12.231647254717316	12.38148505472147	12.343385899015775	12.492027798437926
Con_Pmod_vs_Con_Scr	A0A494C069:Q08AG5|123:155	A0A494C069:Q08AG5	NA:ZNF844	S	123:155	KAFRCHPSFQMQEKA:KAFRCHPSFQMQEKA	-0.238211	16.17990036696784	-2.51795	0.029372267710296458	0.18775493161061174	-3.84946	16.30701091349462	16.279233035124598	16.360964410170464	15.974685090673107	16.243267194859325	16.014622090955303	16.094684297275116	15.807451775228907	16.08339211198036	16.321524212501206	16.471835848859374	16.200133422491678
Con_Pmod_vs_Con_Scr	A0A494C0S0|144	A0A494C0S0	SNX25	S	144	AARRPPGSPVYGNSH	0.052844	12.551072478713099	1.5342153346100051	0.15437324139981043	0.4315652293976178	-5.3555	12.489356172924428	12.49970692924651	12.514809786331837	12.505556479298836	12.628629856366205	12.528218660849786	12.536525144881503	12.479985411275065	12.529896738112823	12.628388898224811	12.6641	12.607693021710976
Con_Pmod_vs_Con_Scr	A0A494C1D7|184	A0A494C1D7	DST	S	184	FSFRKAASLSSIPSG	0.014685875825929173	16.960154811824424	0.38944486191084493	0.7046855460786637	0.8699007956830039	-6.40896	17.110736954352944	17.13118837781193	17.12314383300279	17.18606161471157	17.076353505584414	17.14671167234946	16.818779856702697	16.79016205706533	16.725793892561647	16.76002135022909	16.792450763518826	16.860453864002405
Con_Pmod_vs_Con_Scr	A0A590UJ08|619	A0A590UJ08	DLG1	S	619	KTRDKGQSFNDKRKK	0.0995879	26.454920949988423	0.8884636779885539	0.3940779303062666	0.6695621933379738	-6.0826	26.55412971511315	26.88893147345356	26.5697	26.66207515689537	26.8492	26.800314501718788	26.127075612845218	26.331062081162724	26.519438716942012	26.15559090756135	26.06948470305292	25.932048889975107
Con_Pmod_vs_Con_Scr	A0A590UJC2|146	A0A590UJC2	CDRT15L2	T	146	VMLKSIKTRLGRRVP	0.30810837208911046	12.69040982782442	3.530193017374792	0.00501123	0.0735446	-2.13689	12.573271223104044	12.573019141677236	12.477640212834954	12.853996648310954	12.789294832324783	12.90496421324782	12.840768236596112	13.20857979275718	13.114615452202248	12.442613980311451	12.205462732279022	12.300691468247225
Con_Pmod_vs_Con_Scr	A0A590UJS4|2623	A0A590UJS4	NIPBL	S	2623	AETEDDESDGEDRGG	0.23314984349421586	8.891453046861765	3.3746046882114507	0.0065548	0.0852447	-2.40014	8.861354791988324	8.859052768921385	8.87817	9.202993633177876	8.978014803301596	9.117018197542382	8.896981965800807	8.833535731621968	8.693159390230836	8.704816642739333	8.765409790271661	8.90693
Con_Pmod_vs_Con_Scr	A0A5F9ZHH4|394	A0A5F9ZHH4	ATXN2	S	394	NGGPPRMSPKAQRHP	-0.182876	14.401569218903859	-4.5921	8.611038079722886e-4	0.0323839	-0.400781	14.42537528904055	14.262835660110822	14.376029427956285	14.212227695478685	14.124430234722452	14.178953399796486	14.640953050211015	14.634540294130572	14.614701097231416	14.46861744798966	14.435505201218197	14.444661828960168
Con_Pmod_vs_Con_Scr	A0A669KB05|909	A0A669KB05	CTNND1	T	909	MEPLKGTTPLMQKI_	0.057864716775188896	18.523325027101013	1.1416350271684115	0.2788313305499669	0.5691315236213952	-5.83296	18.741508647532417	18.58287724737418	18.681713880626763	18.74475800981736	18.69898486152132	18.735951054520232	18.218898417028957	18.16158662263581	18.291664565251647	18.528533779918252	18.50742323331114	18.386000005674074
Con_Pmod_vs_Con_Scr	A0A669KB62|849	A0A669KB62	CTNND1	S	849	LIDRNQKSDNNYSTP	0.10155826981724836	12.251786230704273	0.9873544425946217	0.3455507976490184	0.6281115785361877	-5.99119	11.992061623922268	12.218781597707158	12.004334598317136	12.235026385455102	12.050897180613442	12.233929063329764	12.475227878630276	12.278687602940265	12.652246481518436	12.301646296729228	12.424075036865547	12.154521022422642
Con_Pmod_vs_Con_Scr	A0A6Q8PF18:Q9C040|10:10	A0A6Q8PF18:Q9C040	NA:TRIM2	S	10:10:00	SEGTNIPSPVVRQID:SEGTNIPSPVVRQID	-0.0342725	16.993169181940317	-1.33945	0.20853808871517734	0.4976862721099875	-5.60471	16.904736031666125	16.87571518773878	16.90213189432162	16.887410319938837	16.829095678151138	16.863259709427044	17.20456405666245	17.16881358932144	17.155737941295506	17.025427583744605	17.043708299118435	17.057429891897815
Con_Pmod_vs_Con_Scr	A0A6Q8PF18:Q9C040|371:371	A0A6Q8PF18:Q9C040	NA:TRIM2	T	371:371	YLTAELSTPDGSVAD:YLTAELSTPDGSVAD	-0.02458	16.818537992664364	-1.01628	0.3322143323666751	0.6175460712127941	-5.96294	16.80740449032889	16.764256280561455	16.78797414159155	16.784143157596613	16.731142720553787	16.770608975136035	16.86440008416364	16.881129154435158	16.86132153960669	16.86363460685386	16.843964176849855	16.86247658429485
Con_Pmod_vs_Con_Scr	A0A6Q8PF18:Q9C040|428:428	A0A6Q8PF18:Q9C040	NA:TRIM2	S	428:428	VIRSADVSPTTEGVK:VIRSADVSPTTEGVK	0.016916482647461706	14.179100776279675	0.3806803428678752	0.710986	0.8727004499892993	-6.41252	13.995915902021128	14.082130702828694	14.028881059122089	14.025244549223912	14.087649358647589	14.044783204042782	14.351067067466072	14.239303874706458	14.384587454565343	14.294229923278198	14.368607834913131	14.246808384540705
Con_Pmod_vs_Con_Scr	A0A6Q8PF18:Q9C040|440:440	A0A6Q8PF18:Q9C040	NA:TRIM2	S	440:440	GVKRRVKSPGSGHVK:GVKRRVKSPGSGHVK	0.013534215201133293	13.781637327697847	0.40478258853955607	0.693715	0.864056	-6.40254	13.736247321984807	13.700532979726471	13.737215116658891	13.765729945645274	13.70974612854728	13.73912198978102	13.83065456734965	13.715989268526886	13.78647399156465	13.867676923457555	13.924540287626888	13.865719411504802
Con_Pmod_vs_Con_Scr	A0A6Q8PFL2|1171	A0A6Q8PFL2	KIF1A	S	1171	ERARGTHSRIAVEVT	0.0078129	18.583270791100187	0.17277453334118223	0.8660953228838186	0.9442391724945811	-6.47356	18.60616028694098	18.664201741311366	18.648054225789604	18.692696436470964	18.60164285380545	18.64751567701527	18.475458627784633	18.35032921166693	18.337957401857096	18.584278019485605	18.68341451894049	18.70754049213384
Con_Pmod_vs_Con_Scr	A0A6Q8PG83|72;74;77	A0A6Q8PG83	LCOR	S;S;S	72;74;77	LDLTVRKSQSEPSEQ;LTVRKSQSEPSEQAG;RKSQSEPSEQAGNKM	5.736025731444272e-4	16.488407524998436	0.018617961862667735	0.9854929588565386	0.9944872946937208	-6.48932	16.49895464755762	16.424015656456962	16.485284658020007	16.49232498883908	16.44931696731278	16.468333813602154	16.530984932155945	16.540502792768155	16.470319478575217	16.490946816600193	16.477141987134658	16.532763560958447
Con_Pmod_vs_Con_Scr	A0A6Q8PGN6|11	A0A6Q8PGN6	CAST	S	11	PGQKPAASPRPRRAA	0.0347202	18.923324711961737	0.44585010117057006	0.6647076009438104	0.8511145923424481	-6.38418	19.1057	18.893113943545952	19.033019780245414	19.124977866623865	18.94660467891236	19.06444459292484	18.964445211416727	19.111981257933536	18.871631396387965	18.664671489044085	18.548705957685293	18.75056761145669
Con_Pmod_vs_Con_Scr	A0A6Q8PH20|19	A0A6Q8PH20	CAST	S	19	VSEKTSESPSKPGEK	-0.140446	17.719784221712338	-1.79338	0.10155879804793744	0.3519496283099959	-4.99246	17.946254194162357	17.943728760618164	17.976167957518882	17.730814798963888	17.937826671525528	17.776172885584526	17.36612634047353	17.16928029476651	17.42680255957448	17.805275795431044	17.901506154382194	17.657454247546973
Con_Pmod_vs_Con_Scr	A0A6Q8PH20|36	A0A6Q8PH20	CAST	S	36	SDEKKAASLGSSQSS	-0.0436624	14.26428903136737	-0.775949	0.45480570670035425	0.7164858966994482	-6.17646	14.28250386609562	14.408759671037007	14.27280777450775	14.28573497450128	14.237608494490235	14.3097	14.062866519725164	14.271617117797112	14.16011460894642	14.317550859450575	14.222354106060552	14.339809673090242
Con_Pmod_vs_Con_Scr	A0A6Q8PH20|40	A0A6Q8PH20	CAST	S	40	KAASLGSSQSSRTYA	0.0710337	17.24139572687783	1.6804499128203993	0.12216892728807631	0.38828105246777506	-5.15463	17.219048000774226	17.267556724769257	17.190541183802722	17.352561388091438	17.198135689782916	17.339549896216248	17.304638274426285	17.33743494968408	17.38725792422806	17.120789801425595	17.098170917685884	17.081063971647257
Con_Pmod_vs_Con_Scr	A0A6Q8PHK0|45	A0A6Q8PHK0	TRIP12	S	45	QAKHKGYSPPESRKS	-0.0731452	13.654359635151666	-1.58686	0.14200862945246664	0.41517473062515164	-5.28445	13.750039758557918	13.715108827056866	13.701237939197426	13.6253	13.658447567471203	13.663179647352608	13.520809114546044	13.690589685143385	13.666165452224709	13.694416071770892	13.575008790040712	13.59198907138813
Con_Pmod_vs_Con_Scr	A0A6Q8PHS8|575	A0A6Q8PHS8	INF2	S	575	RKKRPSRSQEGNSGR	-0.0291077	16.526357977879364	-0.596414	0.5634642013077178	0.7897577332772855	-6.30242	16.569867100676817	16.706103484992646	16.582955634241873	16.532726460173276	16.644930402723652	16.593946325389023	16.416625973831284	16.54984676263966	16.550062203284902	16.425449154511988	16.369545347845552	16.374236884241704
Con_Pmod_vs_Con_Scr	A0A7I2RJN6|577	A0A7I2RJN6	CASK	S	577	SYRTQSSSCEDLPST	0.0660002	15.631872594878114	1.2790699820541105	0.228263	0.5198529970841633	-5.6772	15.76674212382615	15.625525893411456	15.68632979221659	15.799070394439411	15.688032087414166	15.789495937362128	15.422786166178671	15.451872650619052	15.540781130848984	15.676185050407923	15.605503132175691	15.53014677963714
Con_Pmod_vs_Con_Scr	A0A7I2V383:Q86U42|209:150	A0A7I2V383:Q86U42	BCL2L2-PABPN1:PABPN1	S	209:150	VEKQMNMSPPPGNAG:VEKQMNMSPPPGNAG	0.022535378432159803	18.59980514248917	0.9803365763776055	0.3488448448438114	0.6312202812800974	-5.99794	18.619793772192843	18.57723453375058	18.616277531154154	18.635903058060883	18.622141223873165	18.6229	18.55680437822795	18.52975288401156	18.520955982624255	18.624456751869097	18.63391043443972	18.637563469205837
Con_Pmod_vs_Con_Scr	A0A7I2V3T1|2;10	A0A7I2V3T1	MTHFD2	T;T	2;10	______MTVAMLMKN;VAMLMKNTIIAAKKV	-0.0226226	19.982128940586758	-0.278181	0.7862445798349027	0.9099095610924702	-6.44827	20.060937568560337	20.09591015149976	20.004889499398267	19.993585474056687	20.037422706999173	20.06286118455325	19.699079430494137	19.77176404449807	20.007137382825057	20.135077986026072	20.056124307347773	19.860757550782523
Con_Pmod_vs_Con_Scr	A0A7I2V4G0|17	A0A7I2V4G0	HNRNPA3	S	17	ASLCRRESEPGIGGK	-0.235793	17.184960027090163	-3.75147	0.00343392	0.0611067	-1.76528	17.248845711169334	17.472887433962896	17.30654973585134	17.017978530667765	17.208502912844267	17.09442278063363	17.26542867533839	17.29607207982903	17.386850624506156	16.983712632186187	17.00566274711941	16.93260646097354
Con_Pmod_vs_Con_Scr	A0A7I2V4I5|1438	A0A7I2V4I5	ZC3H13	S	1438	NKSERTESLEAGDDE	0.028407004300897043	13.133344116334436	0.7736487089053444	0.4561079340608786	0.7172143884531061	-6.17826	13.119056991869378	13.075097237278008	13.120675566275562	13.080561118776988	13.210345238833504	13.10914445071514	13.02163439430163	12.997196772913798	13.051588326742474	13.29340860373049	13.2937	13.22772156168087
Con_Pmod_vs_Con_Scr	A0A7I2V4K5|387	A0A7I2V4K5	CTSA	S	387	QYLKLLSSQMEVQRR	0.015754660514971874	19.73755684985217	0.60897	0.5554176313360788	0.784351	-6.2946	19.80580552361216	19.74204669778609	19.781160698102408	19.792165632958486	19.79021161040752	19.793899657679553	19.622167276842067	19.624922546798015	19.65565398811353	19.77304281008392	19.750881490100557	19.718724265741727
Con_Pmod_vs_Con_Scr	A0A7I2V5J8|6	A0A7I2V5J8	NPM1	S	6	__MNYEGSPIKVTLA	0.038809846370309486	10.460353275130403	0.5552591143616237	0.5902850162998087	0.8051836535245918	-6.32699	10.428562671756906	10.44598027341272	10.50305081068428	10.491579382508808	10.544553538710352	10.457890373745665	10.45532087297665	10.155406874966104	10.26995892802618	10.498942775014214	10.690183784387932	10.582809015375036
Con_Pmod_vs_Con_Scr	A0A7I2V647|133	A0A7I2V647	G3BP2	T	133	ELEEKSTTPPPAEPV	0.022006845485506688	18.708550358189996	0.9447581568872702	0.3658961039477928	0.6469454743034984	-6.03156	18.817746183213664	18.77752477871335	18.805247571970497	18.823896488489694	18.821303708566457	18.82133887329788	18.5809	18.614379297180836	18.57555689856823	18.62926293895579	18.603161848122607	18.632278838171736
Con_Pmod_vs_Con_Scr	A0A7I2YQJ8|253	A0A7I2YQJ8	CIT	S	253	EAEERRHSLENKVKR	-0.0800179	5.215450330073353	-1.24896	0.23865702235704342	0.5307063165621585	-5.71246	4.759423409514101	5.006142401961833	4.85157	4.797295914186073	4.788424619186699	4.791358325036276	5.825447921183663	5.654407288790505	5.75766	5.3665462693149575	5.524852699424269	5.4622777480920846
Con_Pmod_vs_Con_Scr	A0A7I2YQM2|1475	A0A7I2YQM2	GBF1	S	1475	HASRGGQSDDDEDEG	0.0490553	16.458378722123108	1.5137135450516708	0.15943683131036748	0.43832799432779307	-5.38277	16.546549380557625	16.491488155587945	16.514531758574396	16.57518532171772	16.548931715475877	16.575618096168817	16.354975659562434	16.45566900616822	16.383140086487902	16.37847472490791	16.307951707855167	16.368029052413288
Con_Pmod_vs_Con_Scr	A0A7I2YQR3|409	A0A7I2YQR3	MARK2	S	409	NPKQRRFSDQAGPAI	-0.13524	16.06135941641017	-3.91945	0.0025864	0.0538492	-1.48604	16.027910217542825	16.089257308928016	16.02905001728867	15.878088157613911	15.94766680418573	15.914744044992585	16.22765747676764	16.336164663220533	16.30491896062315	16.01968570065827	15.966994981636942	15.99417466346376
Con_Pmod_vs_Con_Scr	A0A7P0MRI8|1198	A0A7P0MRI8	PLCB4	S	1198	DGPQTSNSSMKLQNA	-0.0682538	20.962710210477162	-1.40301	0.18932432924369794	0.4758341862179766	-5.52587	21.314322553148457	21.432921253967972	21.307	21.2503	21.29663697969692	21.30254792879464	20.549451451774523	20.66872860130959	20.71897608439435	20.621258047225936	20.5609	20.52950119432254
Con_Pmod_vs_Con_Scr	A0A7P0MRI8|1199	A0A7P0MRI8	PLCB4	S	1199	GPQTSNSSMKLQNAN	-0.09008	18.35383224115509	-2.37577	0.0376528	0.21540944861404568	-4.08396	18.542825855928385	18.661835173738197	18.543461339958156	18.506026625512536	18.45143597302392	18.52041968775395	18.1562	18.21630020925591	18.24509900383421	18.147583621570774	18.12892926812593	18.125826631306698
Con_Pmod_vs_Con_Scr	A0A7P0T890|140	A0A7P0T890	DST	S	140	GASIRRPSSGNASYR	-0.0973049	17.545355409852558	-2.26898	0.0453269	0.23630160944306233	-4.25758	17.62547015810997	17.75472103249675	17.642624058404444	17.53588520419241	17.612680347966496	17.582334980690664	17.63852551839704	17.675438784629193	17.755831140347514	17.264496524044382	17.258653856720482	17.197603312231337
Con_Pmod_vs_Con_Scr	A0A7P0T890|157	A0A7P0T890	DST	S	157	MSSSADFSDEDDFSQ	-0.0239157	15.429289948559944	-0.220759	0.8294901421934935	0.9287450555547305	-6.4635	15.607441422317317	15.299326258372677	15.471118668158525	15.602281307968877	15.206652312255695	15.497205732202987	15.381038152132868	15.54142763040211	15.32202009471966	15.4449	15.288949888863662	15.489087424862552
Con_Pmod_vs_Con_Scr	A0A7P0T890|195	A0A7P0T890	DST	S	195	KRKIQGGSVLDPAER	-0.0123999	16.483560788768827	-0.212137	0.8360386162760679	0.9312835219277718	-6.46549	16.671382689939097	16.669928997534022	16.62769097950026	16.592271046447895	16.684071691999765	16.6555	16.119410386030324	16.23570807616681	16.339552846175714	16.496996385684085	16.40234234293619	16.307913930678847
Con_Pmod_vs_Con_Scr	A0A7P0T890|77	A0A7P0T890	DST	S	77	RSEGFRASPRHLRRR	-0.157589	16.16742743260287	-3.87448	0.0027894	0.055426732399046365	-1.56052	16.545077563756074	16.696389847736008	16.576365196151627	16.47812424136815	16.397995447791462	16.468945094668786	15.7426	15.753271868889996	15.729548581885922	15.837817419862064	15.868586850485364	15.914427354110504
Con_Pmod_vs_Con_Scr	A0A7P0T8K8:Q9NS56|9:9	A0A7P0T8K8:Q9NS56	NA:TOPORS	S	09:09:00	GSQPPLGSPLSREEG:GSQPPLGSPLSREEG	-0.0767569	13.68649903898334	-1.59396	0.14040810817146224	0.41314913683979076	-5.27475	13.668387618593524	13.79392577576476	13.726159402157744	13.686665101242312	13.617863529214317	13.653673421703862	13.782320125237836	13.701762858244296	13.653168323884625	13.57048970236484	13.66175195442767	13.721820654964295
Con_Pmod_vs_Con_Scr	A0A7P0T8V9|97	A0A7P0T8V9	VPS53	S	97	GQDGRQNSLKPYQLF	0.11594043322143222	17.972348586941184	1.5642090493156255	0.14721781758651667	0.4226955658926542	-5.3152	18.025227948166357	17.737231778241686	18.0035	17.984165265861844	18.15352216797451	17.976100880133483	18.034799239711575	17.98805742947751	17.90294638479135	17.960551511855442	17.941806954447458	17.96026619473551
Con_Pmod_vs_Con_Scr	A0A7P0TA61|97	A0A7P0TA61	MFAP3	S	97	GQQLDGRSRGLR___	-0.0851068	7.193077977626421	-1.22696	0.24648821226926942	0.5369813567157635	-5.73781	6.423810324767472	6.7170642603750235	6.487543869336247	6.484274257245414	6.39963	6.489193261615675	7.929607405347792	7.833329934255865	7.977210396485797	7.811967985686431	7.921886510311435	7.841416846172306
Con_Pmod_vs_Con_Scr	A0A7P0Z4M5|41	A0A7P0Z4M5	CC2D1A	S	41	DEEDEQNSPVAPTAQ	-0.0371457	14.573027369022883	-1.30085	0.22097721468456002	0.5107068892526785	-5.65132	14.56781104685605	14.557259126969688	14.562976508667369	14.546481542009008	14.498841889965824	14.531286202202097	14.598171809509113	14.638026209964194	14.562679368957706	14.593821545006458	14.57538571424588	14.643587463921204
Con_Pmod_vs_Con_Scr	A0A7P0Z4P6|411;418;419	A0A7P0Z4P6	SNAP47	T;S;T	411;418;419	IHPYWPRTKEELLAS;TKEELLASTRQLQGG;KEELLASTRQLQGGR	0.12918576178770635	13.142958407148438	1.3590721233494822	0.2024393885077355	0.4908523013045754	-5.58064	13.11687451123355	12.944322005481096	13.011702364012564	13.221458532233292	13.04342229144958	13.19557534240745	13.283137637129093	13.615086785403289	13.326444912310716	13.051699590953344	12.827359807253268	13.07841710591401
Con_Pmod_vs_Con_Scr	A0A804HI01|231	A0A804HI01	SGIP1	T	231	VPATPPRTGSPLTIG	0.12039649130493668	6.294143794502766	2.21732	0.049561671652274625	0.2477145270011454	-4.34066	5.764308884863518	5.954737119080903	5.798485006359309	5.982027406692335	5.9133986057203005	5.983294471805901	6.7153972458155415	6.819476957390694	6.711691737248039	6.594999741427472	6.585434228534573	6.7064741290946035
Con_Pmod_vs_Con_Scr	A0A804HIE8|37	A0A804HIE8	DOCK9	S	37	QGEVEAESPGPVPAK	0.10422527985490326	15.722057357805477	3.5406824037349693	0.00492171	0.0728325	-2.11919	15.31363353350231	15.311198920302116	15.337103647893416	15.395307132243609	15.477500298416722	15.4018	16.089596073678198	16.0796	16.03332938766672	16.055284927682035	16.071063238066664	16.09929562765114
Con_Pmod_vs_Con_Scr	A0A804HIL2|239	A0A804HIL2	WFS1	T	239	RTTSRWMTLWRSLRS	-0.0361582	20.87381817607107	-0.572997	0.5786428576020568	0.7981280794511129	-6.3166	20.983806960460335	20.99129921826401	21.028586436900422	20.93877697692328	21.021039813186857	20.935401274807074	20.623759713126255	20.375243528844376	20.565478445128456	20.97063652518806	21.112674637069976	20.93911458295373
Con_Pmod_vs_Con_Scr	A0A804HIY8|1449	A0A804HIY8	TAF1	T	1449	ATPEKQVTQMRQGRG	0.0814395	13.627204258949831	1.6171779409066445	0.13528961465970182	0.40688605912692277	-5.24287	13.579846146683655	13.568221412880211	13.58920824952868	13.715002703091566	13.600058179073825	13.666533369254015	13.68445451908364	13.696049179191991	13.547949294292756	13.57376661219165	13.584755993168177	13.720605448957816
Con_Pmod_vs_Con_Scr	A0A804HKE7|14	A0A804HKE7	MAP4	S	14	ADALTEPSPDIEGEI	-0.0681703	13.477114191368232	-1.07194	0.307632	0.5956783710380346	-5.90671	13.427613172762772	13.446481485112647	13.386075515986931	13.325545001271742	13.359578082947609	13.37053627818653	13.673846986318669	13.95670060624359	13.81252094561848	13.389790546095094	13.2257	13.35095078788111
Con_Pmod_vs_Con_Scr	A0A804HKE7|1662	A0A804HKE7	MAP4	S	1662	KVDLTLLSPKSENDK	0.1340446500627781	12.29268966404791	1.3220592915267124	0.2140684760846605	0.5040093620036231	-5.62583	11.881641277802466	12.309088351113964	11.966644057844611	12.197050117978916	12.13806768063328	12.224389838337178	12.355216095945678	12.555411029596534	12.381335056236116	12.438499708481327	12.430900236971494	12.634032517633337
Con_Pmod_vs_Con_Scr	A0A804HKE7|1841	A0A804HKE7	MAP4	S	1841	PNKELPPSPEKKTKP	0.013336053075766685	14.690914042198393	0.3169240376762515	0.7574780549887317	0.8942236255443964	-6.43604	14.51617287400629	14.673206082297286	14.579043532117756	14.602473982640984	14.60785787350634	14.598098791501329	14.844904612363273	14.76618929576136	14.778341561185067	14.713993706457083	14.803239540938076	14.807446653605872
Con_Pmod_vs_Con_Scr	A0A804HKE7|1932	A0A804HKE7	MAP4	S	1932	KAPEKRASPSKPASA	-0.0322971	11.6669	-0.718298	0.48816049275484485	0.7430487205216734	-6.22017	11.59441974809398	11.733514160409715	11.642292497742185	11.66299674407649	11.574943173860436	11.635395247232664	11.787334959728344	11.730275099890498	11.700592932279095	11.58075209021275	11.655648049925476	11.704326120225172
Con_Pmod_vs_Con_Scr	A0A804HKE7|1934	A0A804HKE7	MAP4	S	1934	PEKRASPSKPASAPA	-0.0818574	10.058468824096485	-1.16294	0.27045781025600074	0.5616597941135566	-5.80969	10.023332056180283	10.203627803610775	10.087123785208622	9.995818569498262	10.055303760570393	10.017388992245817	10.135525535031377	9.932379460380549	10.173004365608223	9.99475	10.138160305577085	9.945209740680337
Con_Pmod_vs_Con_Scr	A0A804HKE7|1970	A0A804HKE7	MAP4	S	1970	STGPSSRSPSTLLPK	0.10117657305642247	10.56980314472613	1.6399183622551012	0.13043635739934323	0.4013984555193761	-5.21138	10.614743355225356	10.503096323446012	10.539915857973764	10.683289778345271	10.596850392661434	10.68114508480768	10.42146333294746	10.651962856510623	10.49409941536774	10.61186522194926	10.45190167694704	10.58730444053191
Con_Pmod_vs_Con_Scr	A0A804HKE7|1972	A0A804HKE7	MAP4	S	1972	GPSSRSPSTLLPKKP	-0.00911062	12.114797180708551	-0.223528	0.8273892172214742	0.9275978993819822	-6.46284	12.19946017860918	12.173187707791987	12.194392592903576	12.19700449865137	12.162025956953569	12.18067816043218	12.071460046927918	12.15602747386669	12.009625945464744	11.996625329795355	11.95590528957462	12.081172987531426
Con_Pmod_vs_Con_Scr	A0A804HKE7|2012	A0A804HKE7	MAP4	S	2012	RPKSTSTSSMKKTTT	0.21227693987297513	24.428672995950723	2.0656711459203985	0.0642895	0.283346	-4.5805	24.82576875866888	24.735407157258127	24.678417378073966	25.03193439086934	24.79567167561849	25.04881804713204	23.869552947047048	24.057248947405142	24.226710658955323	24.11950480245411	23.936522991571355	23.81851819635486
Con_Pmod_vs_Con_Scr	A0A804HKE7|2013	A0A804HKE7	MAP4	S	2013	PKSTSTSSMKKTTTL	0.20617507635593313	26.59109748444964	2.318419099820715	0.041602487358198506	0.2253784655641016	-4.1775	26.942005497395275	26.99549961207744	26.852539350685916	27.1502	27.053649370604766	27.204721801116037	26.026616787891868	26.219353875070027	26.38072118350784	26.225047292137905	26.07746574398045	25.96535078142258
Con_Pmod_vs_Con_Scr	A0A804HKE7|2062	A0A804HKE7	MAP4	T	2062	SAKPSSTTPRLSRLA	-0.0111896	26.90099299115876	-0.0991277	0.922893	0.9702288121824312	-6.48426	27.524898583731893	27.041720716162217	27.376753911927647	27.369180224213796	27.22766562372516	27.312958581593833	26.373105979999355	26.2171	26.42781909258531	26.7495	26.70302909544028	26.488193912418296
Con_Pmod_vs_Con_Scr	A0A804HKE7|2072	A0A804HKE7	MAP4	T	2072	LSRLATNTSAPDLKN	-0.0558621	18.117207794179826	-1.09491	0.29789781474546234	0.5870222052713343	-5.8828	18.464096288551517	18.2554	18.382531373450497	18.361351080325743	18.242066409345444	18.331029593985964	17.90097262894204	17.92388855440071	17.93707339483126	17.92249099458313	17.852209455647554	17.833378064312583
Con_Pmod_vs_Con_Scr	A0A804HKE7|2073	A0A804HKE7	MAP4	S	2073	SRLATNTSAPDLKNV	-0.0150673	24.033032542638104	-0.307978	0.7640879940293446	0.8977495240842573	-6.439	24.410412361008795	24.38082160923374	24.34733391021321	24.39569595055373	24.29283535349543	24.404834800059312	23.697751254312305	23.783618820914732	23.858904886267396	23.678832792557756	23.59840936047214	23.546939412568708
Con_Pmod_vs_Con_Scr	A0A804HKE7|2086	A0A804HKE7	MAP4	S	2086	NVRSKVGSTENIKHQ	-0.110612	16.238930266723354	-1.73022	0.11266026765050847	0.3708517538620229	-5.08386	16.451253607067187	16.576999593166324	16.452467250348544	16.31010767229666	16.450223056015293	16.388553689409513	15.8804	15.952372096146744	16.09618487388076	16.169488304483384	16.129941101577636	16.009157766820703
Con_Pmod_vs_Con_Scr	A0A804HKE7|2087	A0A804HKE7	MAP4	T	2087	VRSKVGSTENIKHQP	-0.0954639	18.899810053016992	-1.9014	0.0848638	0.32236038272420253	-4.83231	19.172512499465434	19.04574251244062	19.115659332775476	18.975634852109582	19.05943781577455	19.012450125594302	18.593618392680707	18.66967072683697	18.72821353784747	18.891561056217867	18.80179391049155	18.73142587396937
Con_Pmod_vs_Con_Scr	A0A804HKE7|2218	A0A804HKE7	MAP4	S	2218	KAQAKVGSLDNVGHL	-0.0640743	20.68757242590349	-1.81362	0.0982187	0.3467953885792691	-4.96282	20.89570620797656	20.85683120337646	20.862569097198698	20.785753072160944	20.82376869249193	20.813361924774227	20.41398458614847	20.47261734849253	20.524023745570528	20.65529907078594	20.598458647051334	20.54849551481427
Con_Pmod_vs_Con_Scr	A0A804HKE7|280	A0A804HKE7	MAP4	S	280	ALAKDMESPTKLDVT	-0.0810645	22.130751308612517	-2.04092	0.067057	0.2891148320701027	-4.61902	22.229571473227203	22.135388941469767	22.207262055588313	22.11094791926303	22.11275741170216	22.105323754849437	22.073419642822454	21.980732125063668	22.094560981969977	22.194067777907488	22.21622798534121	22.108755634145503
Con_Pmod_vs_Con_Scr	A0A804HKE7|358	A0A804HKE7	MAP4	S	358	LKETERASPIKMDLA	-0.0486307	17.696957561096635	-0.99864	0.3403012140929357	0.6242275444641188	-5.98024	17.715441428396662	17.71046843519711	17.71292179973011	17.65028200649159	17.679703900810033	17.66295358350335	17.67443420567081	17.55702838298162	17.74093083084733	17.77352035389303	17.822917582381763	17.662888223256218
Con_Pmod_vs_Con_Scr	A0A804HKE7|440	A0A804HKE7	MAP4	S	440	AEKVALSSETEVALA	0.055373398536254115	16.33380222029229	1.4175744690190872	0.1851383951869085	0.4708244604732842	-5.50746	16.46688489224161	16.335915014146586	16.41840149148284	16.51225909622777	16.397266767336642	16.47779572991539	16.218046699117657	16.242852319438896	16.198464483728085	16.262576138676163	16.21907763686083	16.25608637433502
Con_Pmod_vs_Con_Scr	A0A804HKE7|507	A0A804HKE7	MAP4	S	507	VGLLKDMSPLSETEM	-0.0360169	22.21944654270706	-1.35149	0.2047779345926363	0.4936210256798391	-5.58997	22.21429219477995	22.1945	22.21481713692252	22.1539	22.19845760819242	22.1631	22.197005451870435	22.155259893517297	22.213424154438897	22.31831364165707	22.33355889779949	22.276690693717057
Con_Pmod_vs_Con_Scr	A0A804HKE7|510	A0A804HKE7	MAP4	S	510	LKDMSPLSETEMALG	0.032546619203275284	14.804888549082923	0.7769947467527368	0.4542145836153775	0.7159819087321451	-6.17564	14.957	14.793457469473063	14.899158292965463	14.963373117404252	14.85429791701254	14.929579749113158	14.69212992286302	14.706627871584304	14.683164003318453	14.75326822190395	14.70574713752882	14.72086372234645
Con_Pmod_vs_Con_Scr	A0A804HKE7|521	A0A804HKE7	MAP4	T	521	MALGKDVTPPPETEV	-0.0374591	21.534136047453316	-1.75031	0.10901563831116846	0.3640130364053035	-5.05498	21.596342121686543	21.607400369603187	21.597334417732235	21.564286459421677	21.559089582599785	21.565323639811112	21.46526041861037	21.44636444872902	21.47781843845696	21.51159355772936	21.52183143102151	21.49698768403805
Con_Pmod_vs_Con_Scr	A0A804HKE7|571	A0A804HKE7	MAP4	T	571	LTLANNVTPAKDVPP	-0.1011	14.019047618406297	-1.72015	0.11452970216677533	0.37383582309629926	-5.09828	13.89274709354789	14.165141064912262	13.941995872235246	13.90639295626678	13.862761649073754	13.92742800580115	14.119585738933088	14.177998120346462	14.180063449920668	13.99093023109146	14.014574326510155	14.04895291223665
Con_Pmod_vs_Con_Scr	A0A804HKE7|620	A0A804HKE7	MAP4	T	620	VGQSAAPTFMISPET	-0.133198	14.722196332701177	-2.29134	0.0436043	0.2317483795954508	-4.22143	14.561673795568964	14.83959979950168	14.64417631101648	14.51436142391704	14.58405668272616	14.547436682628836	14.767935127072423	14.751060983082771	14.779707805914189	14.843196729780312	14.917810251689694	14.91534039951557
Con_Pmod_vs_Con_Scr	A0A804HKE7|643	A0A804HKE7	MAP4	S	643	SLPAEEDSVLEKLGE	-0.182847	15.019945964558534	-3.25748	0.00803334	0.0940714	-2.59902	15.219947435765668	15.205685668749808	15.163527826959308	15.059457863792538	14.922818944621962	15.058343370231484	14.891115725506394	14.889631609126134	15.04969649477462	14.987159239565829	14.955279813693943	14.836687581914724
Con_Pmod_vs_Con_Scr	A0A804HKE7|789	A0A804HKE7	MAP4	S	789	QPRAGGPSDDDNADK	-0.0848459	14.542959502783484	-1.66421	0.12542436886124725	0.39315763722851926	-5.17747	14.660161739745869	14.611600008654436	14.598798185573134	14.616173818580735	14.412384658250929	14.5875	14.504128110818282	14.516146208871293	14.594946364283636	14.511682022404347	14.47421558170996	14.427813680794795
Con_Pmod_vs_Con_Scr	A0A804HKE7|99	A0A804HKE7	MAP4	S	99	EGSDTTGSPTEFLEE	-0.0257448	19.35325277602248	-0.606574	0.5569479902864494	0.7854308761033724	-6.29611	19.416833160162614	19.29063239260326	19.388658826764317	19.347432566560915	19.337459331222966	19.33399823056419	19.186596774632346	19.084216666724046	19.19109740135415	19.57402593638729	19.59604464524673	19.492037380046924
Con_Pmod_vs_Con_Scr	A0A804HL87|10	A0A804HL87	RAPGEF1	S	10	GGLGLRRSPEMSGKI	-0.0673333	11.613151589748018	-1.20634	0.2540145243972858	0.5444475849290549	-5.76128	11.670309733183585	11.458293463417755	11.617389417426145	11.565913709224372	11.462402184281949	11.515676886286792	11.726090672749375	11.757824848728523	11.631075649602414	11.65489652694714	11.60117685040088	11.696769134727283
Con_Pmod_vs_Con_Scr	A0A8C8KBL6|1049	A0A8C8KBL6	ITGA6	S	1049	AEIHAQPSDKERLTS	0.1912263235680598	8.546024163651202	2.571518863282343	0.026740477650607834	0.17881170465452048	-3.76029	8.163148196430818	8.444828846723299	8.231930522781578	8.427479418688662	8.507923407128283	8.478183710822925	8.637550050609502	8.54247	8.753053393722276	8.774660128025452	8.873881979930983	8.717177239770866
Con_Pmod_vs_Con_Scr	A0A8C8NWT4|472	A0A8C8NWT4	PLEKHG3	S	472	AGMKHAGSAGTLLDF	-0.0338155	16.78384717097517	-0.903537	0.3863872348878141	0.6632394669075613	-6.0692	16.82938893995097	16.883970565306647	16.859560625024216	16.78700389816902	16.878856167911522	16.805613660501834	16.75033177387286	16.817059125403837	16.712645359639858	16.67486571340458	16.661626145584112	16.74524407693261
Con_Pmod_vs_Con_Scr	A0A8I5KSE4|36	A0A8I5KSE4	NAV1	S	36	RIPTPGASPQLRPRQ	0.0494521	15.296031060423239	1.1947083129884652	0.2583430876940662	0.5490466523203469	-5.77439	15.348001858444164	15.2566	15.343731212275928	15.414924728404406	15.318106641126972	15.36368966400561	15.320401558561358	15.205315423590092	15.205127196832407	15.222844315760236	15.27740909511688	15.276189434883404
Con_Pmod_vs_Con_Scr	A0A8I5KSE4|49	A0A8I5KSE4	NAV1	S	49	RQAGLALSPQRAASP	0.0611661	17.628675397883477	1.2120678656430972	0.2519069774336709	0.5420003426445731	-5.75479	17.704783247876158	17.56481388329885	17.66699817351132	17.758984112803336	17.644435252121824	17.716674362207694	17.55503277647251	17.415091272792562	17.53334368658756	17.669119504554985	17.70919066710889	17.605637835266037
Con_Pmod_vs_Con_Scr	A0A8I5KX04|800	A0A8I5KX04	PCF11	S	800	SERARRLSPISGSRT	0.0450963	14.848566319622547	1.0432	0.3201462508914321	0.6071644602405114	-5.93604	14.75647118241918	14.855835521120817	14.755371384873554	14.88068983554625	14.754809449262195	14.86746778508424	14.917075886223804	14.998809297753818	14.935854773482545	14.809906400948128	14.78520369351619	14.865300625239854
Con_Pmod_vs_Con_Scr	A0A8I5KX04|813	A0A8I5KX04	PCF11	S	813	RTYAENLSPHEGRRR	0.0613425	12.32348352237614	1.2690423542205542	0.23168210107152623	0.5236567815174554	-5.68901	12.176864534121853	12.289599658503947	12.216042714958895	12.312491313976674	12.260014719016404	12.294028505505008	12.436777580968702	12.479247250237629	12.34517668807924	12.301059263227584	12.319738796434024	12.45076124348372
Con_Pmod_vs_Con_Scr	A0A8I5KXR5|84	A0A8I5KXR5	TANC2	S	84	IMEGMSRSLPSSPLL	0.0687971	16.826629059957643	1.3269677829263677	0.21249512846433646	0.5028568834222376	-5.61989	16.87963976461157	16.72259754150589	16.797849767275192	16.938938626999423	16.762596446192187	16.904943191986376	16.797933579389433	16.826292087447563	16.86080735468547	16.86170791902594	16.795175742203124	16.771066698169555
Con_Pmod_vs_Con_Scr	A0A8I5KXR5|84;88	A0A8I5KXR5	TANC2	S;S	84;88	IMEGMSRSLPSSPLL;MSRSLPSSPLLTHQS	-0.080151	17.39533385109916	-2.35381	0.039120500035814944	0.21992785369367857	-4.11986	17.54688060892915	17.42413530947416	17.52535147497706	17.420050720339134	17.42986767992239	17.405995875938054	17.3679	17.381447130029066	17.316888038489697	17.313746602978437	17.286079325182005	17.325712644141955
Con_Pmod_vs_Con_Scr	A0A8I5KXR5|88	A0A8I5KXR5	TANC2	S	88	MSRSLPSSPLLTHQS	0.0725891	11.133794757675913	1.8253626300994545	0.0963261	0.34467474213127247	-4.94553	10.97692965092642	10.940040850850805	11.007139867568627	11.04204345384854	11.079835949706176	11.019998208396371	11.23666652316715	11.169711282967706	11.097624408874175	11.295485683463504	11.345129339108343	11.394931873233135
Con_Pmod_vs_Con_Scr	A0A8Q3SI92|1149	A0A8Q3SI92	PCDH7	S	1149	MPVDERGSQEKLANG	-0.000990001	13.438773494901945	-0.0362688	0.971745	0.9894343922236837	-6.48881	13.241336148510792	13.181645587910117	13.242402755410428	13.220377684452563	13.234507200718545	13.207529602414825	13.58590788293344	13.565022168258048	13.523	13.740899038804995	13.748173057180573	13.774458865321598
Con_Pmod_vs_Con_Scr	A0A8Q3SIU1|288	A0A8Q3SIU1	RASAL2	S	288	LEVPAERSPRRRSIS	-0.126318	13.560015714854487	-2.39448	0.036445308161646726	0.21152409219218785	-4.05331	13.550623839851584	13.696133489118766	13.607216914271854	13.398508779153232	13.615178612735631	13.461332205517046	13.574009395114924	13.636388713346776	13.608163371570017	13.51797417545944	13.51973623619619	13.534922845918386
Con_Pmod_vs_Con_Scr	A0A8Q3SIW6|1969	A0A8Q3SIW6	MTCL1	S	1969	HGLSQYNSL______	-0.0957118	15.567982128102138	-1.89349	0.0859947	0.32441542027572506	-4.84419	15.510285384125533	15.61550081156713	15.509747837976445	15.53148085247483	15.322612216278252	15.49430561431555	15.627950618267278	15.63168556211355	15.625795099393626	15.622710632317464	15.64132176403569	15.6824
Con_Pmod_vs_Con_Scr	A0A8Q3WKK6:A0A0J9YXC7:P0CW20|46:46:46	A0A8Q3WKK6:A0A0J9YXC7:P0CW20	LIMS1:LIMS3:LIMS4	S	1 day, 22:46:46	SKLQRRHSDVKVYKE:SKLQRRHSDVKVYKE:SKLQRRHSDVKVYKE	0.12404618200664075	19.558380101108575	1.5163472088392476	0.15877839550798437	0.4379178480370651	-5.37928	19.479094085535547	19.702285287021095	19.54852542620616	19.651938071155747	19.76159698834233	19.68850828528465	19.526533741287466	19.734173215805292	19.47668151718797	19.329293345757943	19.285613013808067	19.51631823591064
Con_Pmod_vs_Con_Scr	A0A8Q3WKR1|206	A0A8Q3WKR1	ZNF185	S	206	AAKKSTGSPTQETQA	-0.0214073	16.421959506535032	-0.512668	0.6187361299302783	0.8238169065711691	-6.35067	15.980745274458425	16.08881668323251	16.02203184843848	15.958133867803314	16.075650856061092	15.993587205806536	16.77091059911563	16.71381041000018	16.80875574460027	16.876692179754922	16.928526090589617	16.84585331855939
Con_Pmod_vs_Con_Scr	A0A8Q3WKR1|208	A0A8Q3WKR1	ZNF185	T	208	KKSTGSPTQETQAPF	0.013435804167128751	11.063387349892212	0.11880797918995308	0.9076572233795475	0.9641525399729174	-6.48196	10.345184919621378	10.730276628069902	10.479568336549116	10.362504756799389	10.746909214681324	10.48592332526106	11.526739809342963	11.438428041421323	11.657868658794204	11.642070828400431	11.766922122472517	11.578251557292926
Con_Pmod_vs_Con_Scr	A0A8Q3WKR3|56	A0A8Q3WKR3	PPP2R5C	S	56	AKIKVPVSQPIVKKD	0.00469601	17.179196261661385	0.034698897672072765	0.9729669866369801	0.9899772104840625	-6.48887	17.159225535583577	17.34193758502625	17.113933759250212	17.107428097392678	17.27341868087877	17.248338128619075	16.964862806317996	17.076778308509144	17.47161561937278	17.302054341224306	17.20813583341184	16.882626444349977
Con_Pmod_vs_Con_Scr	A0A8Q3WKT3|67	A0A8Q3WKT3	RBFOX2	T	67	GMQNEPLTPGYHGFP	0.0531791	14.642944787266336	1.9252803612898657	0.0815321	0.31514584633371423	-4.79628	14.734075589598577	14.662630234632529	14.72717285597907	14.751565175625862	14.784437054058714	14.747413788320475	14.554628828418382	14.564828171524452	14.515322544674843	14.55785468807609	14.542784160926232	14.572624355360803
Con_Pmod_vs_Con_Scr	A0A8Q3WKW1|342	A0A8Q3WKW1	CD46	S	342	LNQPLQQSREAE___	0.1405111846531799	15.395619093972323	1.175889432045569	0.26546715526197023	0.5559521576166916	-5.79539	15.112009219153215	15.264797869430875	15.261475207293053	15.400431423131083	15.346823339947608	15.31256108675799	15.908422167265089	15.40705396761418	15.544554932574584	15.194755193406184	15.549471061110744	15.445073659983274
Con_Pmod_vs_Con_Scr	A0A8V8TLD8:O75152:A0A1B0GTU1:P0DQW0|760:759:760:760	A0A8V8TLD8:O75152:A0A1B0GTU1:P0DQW0	LOC441155:ZC3H11A:ZC3H11B:ZC3H11C	S	760:759:760:760	MKTRRLSSASTGKPP:MKTRRLSSASTGKPP:MKTRRLSSASTGKPP:MKTRRLSSASTGKPP	-0.0915246	18.12296408991806	-1.98421	0.0738248	0.3004894801752237	-4.70651	18.239818563427963	18.365649547357833	18.27539678117229	18.148171634347115	18.26525163163533	18.19286784233172	17.99308724616989	17.95590196533081	18.07238941484129	17.995769799893598	18.03468921199471	17.936575440514158
Con_Pmod_vs_Con_Scr	A0A8V8TLD8:O75152:P0DQW0|132:132:132	A0A8V8TLD8:O75152:P0DQW0	LOC441155:ZC3H11A:ZC3H11C	S	132:132:132	LSVQSNPSPQLRSVM:LSVQSNPSPQLRSVM:LSVQSNPSPQLRSVM	0.0495601	13.49733014210359	1.3857328818208514	0.19439355184581283	0.48214860660742753	-5.54755	13.569641693427815	13.47508479803138	13.559750679920816	13.540638678256636	13.654273948113316	13.558244724318232	13.457473835878655	13.479233154174617	13.45122503543487	13.427475820410033	13.397358342969172	13.397560994307524
Con_Pmod_vs_Con_Scr	A0A8V8TMC4|20	A0A8V8TMC4	CCNYL1B	Y	20	STLFLRKYQMSVQEK	-0.0630735	17.80472188973521	-2.52032	0.029250753746528226	0.18734107203016623	-3.84553	17.90384746265116	17.90621030846868	17.89123699354574	17.860556337255407	17.799293913829434	17.852223931696603	17.7734	17.76083585497525	17.800398840660815	17.710629007504583	17.71186402352018	17.686125141793458
Con_Pmod_vs_Con_Scr	A0A8V8TMC7|26	A0A8V8TMC7	SORBS2	S	26	AAGRDSQSPDSAWRS	0.105415	15.201848979726453	2.714075430299382	0.0208197	0.15597054658496923	-3.52127	14.907567043611357	14.917628727285814	14.95269022873921	14.993943509833908	15.104037138030346	14.996149319438734	15.513086085084026	15.446489987676822	15.409325879579384	15.350315340525835	15.406836626775045	15.424117870136955
Con_Pmod_vs_Con_Scr	A0A8V8TMC7|522	A0A8V8TMC7	SORBS2	S	522	SSRAPALSPTRTDRI	0.0670914	12.432878080440181	2.025263254706414	0.0688645	0.29191128112868714	-4.64328	11.840857878933656	11.916791205376285	11.866909775222457	11.891308969084664	12.006533950560572	11.927990083207934	12.926159248845316	12.944577699275056	12.966704265794109	12.973648463953165	12.978205523212328	12.954849901816631
Con_Pmod_vs_Con_Scr	A0A8V8TMC7|636	A0A8V8TMC7	SORBS2	S	636	SRAKDRESPRSYSST	0.21583568468486547	14.449080693345657	3.553226314779455	0.00481681	0.0717629	-2.09804	13.828862876286475	13.85617879978665	13.824877873879313	13.960377586481307	14.161448379380198	14.035600638145526	14.949039125788122	14.986330908694454	15.117998786498935	14.9565	14.920585435904387	14.791171422012622
Con_Pmod_vs_Con_Scr	A0A8V8TQ72|708	A0A8V8TQ72	ARHGEF7	T	708	TSAKTRQTLNSSSRK	-0.153813	13.877280778436491	-3.87208	0.00280073	0.055426732399046365	-1.56451	14.15817481349366	14.118829108118431	14.187513958565392	13.974710973743242	14.06075199805427	13.967616891748651	13.690933859888682	13.655009988930628	13.572902869929756	13.675553522536449	13.706203900583352	13.759167455645384
Con_Pmod_vs_Con_Scr	A0A8V8TQ72|717	A0A8V8TQ72	ARHGEF7	S	717	NSSSRKESAPQVLLP	-0.221396	20.23022165374453	-2.10024	0.060604511597501964	0.27604539443996756	-4.5264	20.262325778798548	20.57272548889044	20.33967558413209	19.98398199090385	20.39101996299381	20.135536687110307	20.14002087813868	20.311027101791566	20.366648582029416	20.13369987770105	20.0912	20.03475986220229
Con_Pmod_vs_Con_Scr	A0A8V8TQ72|736	A0A8V8TQ72	ARHGEF7	S	736	IIVEETKSNGQTVIE	0.014416446082273993	14.88373328365868	0.5040318257572639	0.624588	0.827293	-6.35525	14.918706078358394	14.922932448988927	14.900877305602236	14.9394	14.904078863549309	14.942252704257768	14.76844337926263	14.854793561461523	14.803466110797832	14.900295509421907	14.849982690703133	14.899537148111191
Con_Pmod_vs_Con_Scr	A0A8V8TQW4|919	A0A8V8TQW4	AP3D1	S	919	GQDQDKKSPKPKKKK	-0.0194818	6.9019377169712754	-0.162517	0.8739662638929484	0.947788	-6.4754	6.936673034918101	6.863959754398949	6.847395814523399	6.925214565806696	6.751279440277168	6.913089288381998	7.032202897392998	7.491307463696128	7.0829196836249455	6.716698716353527	6.449131732944701	6.813380211336695
Con_Pmod_vs_Con_Scr	A0A8V8TRF6|675	A0A8V8TRF6	CLASP1	S	675	VSQSQPGSRSSSPGK	-0.0909745	10.216419125073188	-1.59004	0.14128887427201797	0.4149083738355144	-5.28011	10.204214705659847	10.125268831438577	10.250314488704158	10.047258167976594	10.21595967441761	10.04365660744677	10.353765810171094	10.222099499885664	10.195418330747064	10.26332573075404	10.34270319312725	10.333044460549573
Con_Pmod_vs_Con_Scr	A0A994J469|478	A0A994J469	FIP1L1	S	478	RERERDHSPTPSVFN	0.0258401	13.915953430606804	0.7815909640540334	0.45162212062399076	0.714354	-6.17202	13.931951081793896	13.84999219400424	13.897154642488992	13.906651631702834	13.930296898720648	13.91966979465327	13.89104801924714	13.906648435049998	13.961217687237063	13.976878547362196	13.938293500019958	13.881638735001408
Con_Pmod_vs_Con_Scr	A0A994J5E5|38	A0A994J5E5	CYTH2	S	38	TGGTAPDSPRAFLAA	-0.0147713	10.135772085379466	-0.236917	0.8172539328156254	0.9240041760346495	-6.45956	10.261474004573158	10.121738013999378	10.260322885687993	10.25883269900223	10.15305573384374	10.187332477424471	10.166872113007516	10.100322867059928	9.953550798532556	9.993443769605909	10.027254127812476	10.14506553400424
Con_Pmod_vs_Con_Scr	A0A994J6L3|135	A0A994J6L3	DNM1L	S	135	EKSPNPKSMKHLFFP	-0.119123	8.437576524779365	-0.705791	0.4955925960903328	0.7483210098824518	-6.22925	8.955281144798315	9.041740115444602	8.800504791078117	9.061275480069371	8.390071497540045	8.988811374021198	8.07031	8.51046	8.312294538427224	7.793675927273206	7.530810533339321	7.795680326611973
Con_Pmod_vs_Con_Scr	A0A994J749:P12268|1096:416	A0A994J749:P12268	IMPDH:IMPDH2	S	1096:416	KKYRGMGSLDAMDKH:KKYRGMGSLDAMDKH	-0.0169254	15.305113151104948	-0.558197	0.5883480637624726	0.8041026483648054	-6.32529	15.389668278510886	15.350688799759617	15.396108232464506	15.388643905980816	15.3394	15.357649709322285	15.289650565793815	15.225645568489602	15.20203790006846	15.209328993039856	15.246464565710612	15.266075903529218
Con_Pmod_vs_Con_Scr	A0A994J7H4|36	A0A994J7H4	NPLOC4	S	36	AAAARGSSPEAGAAA	0.00205952	17.24660746725664	0.0829612	0.9354339560659395	0.9751391465172243	-6.48583	17.256763539801707	17.279137050708474	17.26704761547218	17.28379152545485	17.253572723455633	17.271762512343738	17.223411410460983	17.22610831923017	17.182784489549206	17.2177	17.227570389016734	17.269675635787337
Con_Pmod_vs_Con_Scr	A0A994J7I5|24	A0A994J7I5	KHDRBS3	S	24	GLPQGRRSPLGPRAR	0.2627261020615759	9.10445	2.8705602472845904	0.015814	0.13590190604112506	-3.25678	8.774748864264577	8.312803208977142	8.659549574603068	8.874927041883563	8.834006165422531	8.82635	9.581191347545264	9.58647	9.515466813098053	9.493192035574594	9.390303564646947	9.404426139179217
Con_Pmod_vs_Con_Scr	A0A994J7V4|463	A0A994J7V4	SRRM1	S	463	KPRKVELSESEDKGG	-0.0306237	13.670035967023844	-0.512839	0.6186202273182442	0.8238169065711691	-6.35057	13.779217630959607	13.587192276436763	13.732019894455869	13.639967094149243	13.715646639311665	13.650944827240236	13.652008512827749	13.568362456386836	13.711869086362269	13.725127873311662	13.714658649342311	13.56341666350193
Con_Pmod_vs_Con_Scr	A0A994J7X6|92	A0A994J7X6	DLG2	T	92	VAGLQERTRERKEGR	0.012602943825442026	16.14420443476736	0.335388	0.7438999016340098	0.8867392080972275	-6.42966	16.175438471776154	16.119671881029632	16.14951495723404	16.132755495432594	16.19201431160589	16.15766433447765	16.222542898948628	16.221918257791874	16.312634288849978	16.062532568033184	16.03614519231194	15.94762055971674
Con_Pmod_vs_Con_Scr	A0A9H3ZVE5|172	A0A9H3ZVE5	MFF	S	172	GQLVRNDSLPVLRGG	-0.0368329	17.595925193698687	-1.00404	0.3378124349984376	0.6225318512707382	-5.97498	17.8449	17.771198863933197	17.794760938933273	17.77224021417758	17.74500616461039	17.783067969693843	17.415173886643366	17.471944379376225	17.519747995317637	17.401907423766886	17.33712884060192	17.294072466197218
Con_Pmod_vs_Con_Scr	A0A9L9PYL0|146	A0A9L9PYL0	MFF	S	146	GQLVRNDSLVTPSPQ	-0.0993446	20.320015318495273	-2.19604	0.051414166593353385	0.2521129988414908	-4.37469	20.455565796253712	20.512882768068497	20.430734546958053	20.40973941027562	20.28487742197461	20.406532349409453	20.384491404612813	20.378595084852854	20.493785936289704	20.05544975531316	20.051278448879295	19.97625089905551
Con_Pmod_vs_Con_Scr	A0AA34QVG5|83	A0AA34QVG5	HDGF	S	83	RGARGARSPAMSRSN	-0.0111643	13.242924394210585	-0.149046	0.8843251145073532	0.9534502582289521	-6.47764	13.163336944131103	12.98411922198312	13.129331708657745	13.194906819610578	12.950084872401757	13.09830341437472	13.550563047309668	13.312439565185162	13.41336942992816	13.334678238491426	13.432226902692792	13.351732565760784
Con_Pmod_vs_Con_Scr	A0AA34QVV1|66	A0AA34QVV1	PTMS	S	66	PGPRLPASPGPGPGT	-0.000553161	15.313562687689455	-0.0224785	0.9824853833034459	0.9933992083708074	-6.48924	15.324691563345178	15.28491188875807	15.302370625434978	15.324426018371067	15.27126518284235	15.31462339324158	15.293240384083456	15.290280203701776	15.314817165668812	15.362025791642363	15.349301545415464	15.330798489768354
Con_Pmod_vs_Con_Scr	A0AAG2TTP8:P62241|130:130	A0AAG2TTP8:P62241	LOC102723573:RPS8	T	130:130	CKKGAKLTPEEEEIL:RKKGAKLTPEEEEIL	-0.0316191	17.48672591445313	-1.12587	0.2851577384907626	0.5753567603294638	-5.84996	17.56655466845547	17.499414880355417	17.53461656177322	17.530950016900206	17.45934342668552	17.515435435582063	17.382251544738903	17.37913420372878	17.402848016450598	17.54253776910194	17.52311123863871	17.504513211026744
Con_Pmod_vs_Con_Scr	A0AAQ5BH85|70	A0AAQ5BH85	TPM1	S	70	ELHKAEDSLLAAEEA	0.00268059	12.087945214144936	0.0298781	0.9767214585438713	0.9909094806532243	-6.48903	11.929207279588956	12.031986842951587	11.991722910020194	12.118099199698944	11.834544546752058	12.008315045477683	12.3488	12.127623211480111	12.080928642917272	12.051099143640306	12.227599987085828	12.3054
Con_Pmod_vs_Con_Scr	A0AAQ5BHC3|215	A0AAQ5BHC3	TPM1	S	215	MAAEDKYSQKEDRYE	-0.0714244	20.183988066194637	-0.63663	0.5379205705030894	0.7745774550715371	-6.27684	20.271993625912156	20.52157167302778	20.354996739219096	20.19237115236661	20.45770419188316	20.284213435206897	19.778544428469928	19.569425402487077	19.947379853331455	20.28715644354792	20.433356538418224	20.10914331046533
Con_Pmod_vs_Con_Scr	A0AAQ5BI29|96	A0AAQ5BI29	VPS4A	S	96	QSEGKGDSDSEGDNP	-0.125008	16.299961295235132	-1.62079	0.1345072571637029	0.40592039198922686	-5.23788	16.41706775295179	16.41062201115775	16.410463026650874	16.2342	16.350453824683203	16.27845565373936	16.30874157273575	16.165591667367323	16.457649074001626	16.241883880766633	16.292741618256905	16.031644753985066
Con_Pmod_vs_Con_Scr	A0AVT1|36	A0AVT1	UBA6	S	36	LPIMSTASVEIDDAL	0.0164891	13.780394870423413	0.3394332328241376	0.7409373644827542	0.8851016480698963	-6.42821	13.792053651252656	13.777974889853926	13.825061189017765	13.843435432730308	13.801472313038367	13.799649175064978	13.83287260479542	13.77243553984806	13.655479060541914	13.68427175492732	13.740417996874609	13.839614837135638
Con_Pmod_vs_Con_Scr	A0FGR8|676	A0FGR8	ESYT2	S	676	SAQVKRPSVSKEGRK	-0.23556	17.956663860355555	-2.53347	0.028584360401766595	0.18531005450470497	-3.82366	18.043838009279987	18.227408200311217	18.10050059041873	17.751719658913547	18.05669070991717	17.856656450037182	17.971318570324023	17.89938655706574	18.157527709956913	17.844271148870337	17.901742232766914	17.668906486404914
Con_Pmod_vs_Con_Scr	A0FGR8|691	A0FGR8	ESYT2	S	691	TSIKSHMSGSPGPGG	-0.144048	15.352697153865098	-3.57855	0.00461205	0.0701372	-2.05537	15.488433162625826	15.555429124796458	15.539417500036652	15.390494439329958	15.39172037532864	15.36892158556789	15.286994122815026	15.216564927383487	15.158062384044692	15.211675991634198	15.28534439155085	15.339307841267482
Con_Pmod_vs_Con_Scr	A0FGR8|743	A0FGR8	ESYT2	S	743	SSSSLLASPGHISVK	-0.0110476	14.359430548044896	-0.129838	0.8991342027485927	0.9600073991977209	-6.4805	14.450364929559507	14.39059574373103	14.386983089141095	14.458244697700554	14.299901053284344	14.436655356685852	14.197938497471595	14.49596439444991	14.21129269614483	14.359176056128655	14.184652328143756	14.441397734097634
Con_Pmod_vs_Con_Scr	A0FGR8|758	A0FGR8	ESYT2	S	758	EPTPSIASDISLPIA	-0.0152085	10.63668035918237	-0.261004	0.7991091162595865	0.9145344489879089	-6.45319	10.692542903383025	10.700089277904706	10.752147754990432	10.616869942028105	10.840597406468516	10.641687166974808	10.589211899571437	10.58385943238198	10.465917906991288	10.541598522952466	10.571647580632137	10.643994515909528
Con_Pmod_vs_Con_Scr	A0FGR8|761	A0FGR8	ESYT2	S	761	PSIASDISLPIATQE	-0.0153057	17.11719156858742	-0.504397	0.6243400757406397	0.8272725356129736	-6.35506	17.270881401154824	17.360686377116824	17.29978558295899	17.28915402643748	17.30073902044718	17.295543269666247	16.970012460447577	16.912349019311574	16.974924909059197	16.89199331799492	16.942716687415484	16.897512751038732
Con_Pmod_vs_Con_Scr	A0JNW5|414	A0JNW5	BLTP3B	S	414	VKDHNVGSPPKSPTH	0.0393861	13.443709534978737	1.098259853055412	0.2964995787599939	0.5860689686223567	-5.87929	13.392995110542888	13.461849617015442	13.411559327732476	13.450799721981674	13.47342425915281	13.460338436176704	13.448146087612596	13.536073200705324	13.430371155449714	13.405138295128149	13.37942852358902	13.474390684658042
Con_Pmod_vs_Con_Scr	A0JNW5|418	A0JNW5	BLTP3B	S	418	NVGSPPKSPTHASPQ	-0.202172	19.16860448308697	-2.97374	0.013193539751283673	0.12229452839514063	-3.08163	19.132951822802667	19.17518637442345	19.160385248945047	18.96965712656271	18.938277677466996	18.95407396180419	19.23078957952704	18.974888508250416	19.226391511081538	19.39430519323418	19.536938257613173	19.32940853533221
Con_Pmod_vs_Con_Scr	A0JNW5|775	A0JNW5	BLTP3B	T	775	LLKEYYSTESEPLTN	-0.0233094	17.575806305399393	-0.340824	0.7399197103410929	0.8845263699060341	-6.42771	17.587248926487696	17.63580748586555	17.64506109750147	17.638159458086715	17.57145524854372	17.588574458976407	17.599699763501405	17.299840917011927	17.454045646408233	17.5447	17.73398058845073	17.61113500621608
Con_Pmod_vs_Con_Scr	A0JNW5|951	A0JNW5	BLTP3B	S	951	KDPLLFKSASDTNLQ	-0.0944835	17.15988604693667	-1.75338	0.10846878082252226	0.3629373654898083	-5.05056	17.1497	17.064604814469977	17.103989028611117	17.064423379968552	16.9324	17.03805924905438	17.373138552574975	17.263349305053996	17.435093114408346	17.19547427179619	17.21882283015175	17.07953121272847
Con_Pmod_vs_Con_Scr	A0MZ66|3	A0MZ66	SHTN1	S	3	_____MNSSDEEKQL	-0.0251606	13.251877226921485	-0.454068	0.6589695701017759	0.8480625508692369	-6.3803	13.31828242257885	13.34175340924461	13.350763474497358	13.316014019750982	13.322830105397548	13.29647352647298	13.19923015894335	13.26241544783694	13.058399248846674	13.130316469820398	13.126480362109334	13.2996
Con_Pmod_vs_Con_Scr	A0MZ66|4	A0MZ66	SHTN1	S	4	____MNSSDEEKQLQ	-0.0528434	13.491403789030855	-1.66516	0.1252319525106988	0.39315763722851926	-5.17614	13.511992703743385	13.572244420302985	13.54265910109718	13.490740960642675	13.49429234601484	13.483332862953212	13.47040757746656	13.475869902176376	13.40247355412667	13.446665993127048	13.469434886987957	13.536731159731378
Con_Pmod_vs_Con_Scr	A0MZ66|506	A0MZ66	SHTN1	S	506	LATSESKSMPVLGSV	-0.0209698	29.915341519458966	-0.221414	0.8289929912393411	0.9286909781379538	-6.46335	30.3206	29.99308891919022	30.222490183117703	30.290232742061622	29.994874859585536	30.18811298585726	29.905821706778656	29.689547619459223	29.84292270432764	29.53166592280722	29.56920173218291	29.435588071860415
Con_Pmod_vs_Con_Scr	A1IGU5|11	A1IGU5	ARHGEF37	S	11	HGADEPSSRSGSPDR	-0.00193477	18.065832667591227	-0.0330629	0.9742410660840433	0.9903921741754799	-6.48892	18.208781282903605	18.25802071662843	18.24745802973908	18.161267745126494	18.34701055354244	18.200177418162212	17.829362395600295	17.962754784606762	17.781910096714675	17.91551072197271	17.870251345916838	18.0075
Con_Pmod_vs_Con_Scr	A1IGU5|15	A1IGU5	ARHGEF37	S	15	EPSSRSGSPDREGRA	-0.0760124	19.448245234348715	-1.81419	0.0981259	0.3467869769298786	-4.96198	19.674203037901982	19.653299254329816	19.656987034472273	19.524704335509767	19.65741394380317	19.574333894039704	19.157426165075545	19.234626364312906	19.26980233433138	19.38070191542243	19.320341928425215	19.27510260456037
Con_Pmod_vs_Con_Scr	A1L390|475	A1L390	PLEKHG3	S	475	KGKGRRESESSRSSR	-0.0667372	18.703761087335415	-1.05149	0.31650019013440717	0.6045514285348776	-5.92765	18.807943817042144	19.002314760223452	18.82852421662904	18.739611530128492	18.879971069899447	18.818988557399308	18.65134895622531	18.84179966439619	18.81995979647364	18.39362837335841	18.316790273364056	18.344252032885493
Con_Pmod_vs_Con_Scr	A1L390|488	A1L390	PLEKHG3	S	488	SRRPSGRSPTSTEKR	0.0353461	15.39882164451975	1.192854562089426	0.25903803466066205	0.5498154136550473	-5.77647	15.646744483216493	15.57923083516183	15.616841172195384	15.641345536463657	15.657037462524285	15.650471816826714	15.05335402586246	15.132769213632722	15.090727947734525	15.271826427561066	15.208825021482014	15.23668579157584
Con_Pmod_vs_Con_Scr	A1L390|614	A1L390	PLEKHG3	S	614	ERFVSSFSRRSSVAQ	0.00989758	20.456761378010757	0.1545415002912991	0.8800966115791047	0.9511442011498429	-6.47675	20.652009123941433	20.585945227400146	20.61820701216368	20.572710020586356	20.6918	20.621306065660143	20.277299302912645	20.24292443622837	20.44203572115865	20.336362838459586	20.314131913021537	20.126366853827733
Con_Pmod_vs_Con_Scr	A1L390|617	A1L390	PLEKHG3	S	617	VSSFSRRSSVAQEDS	-0.107778	14.893665734097008	-1.99015	0.0730875	0.299149	-4.69741	15.189607404751593	15.185084962927874	15.204873297945753	15.017496766229256	15.184442664512735	15.054290865079224	14.540942876819114	14.687646238593064	14.519051412661511	14.718650442605451	14.64905223277283	14.77284964426569
Con_Pmod_vs_Con_Scr	A1L390|618	A1L390	PLEKHG3	S	618	SSFSRRSSVAQEDSK	0.014945448454497523	15.495456955879543	0.4537883666109597	0.6591644545541692	0.8481060330567861	-6.38043	15.629589577094292	15.621145926775371	15.659350002708855	15.633795869942515	15.693236917325244	15.627889064674251	15.35129201190621	15.251761987409552	15.2754	15.368450960835442	15.431862626934016	15.40167741506898
Con_Pmod_vs_Con_Scr	A1L390|631	A1L390	PLEKHG3	S	631	SKSSGFGSPRLVSRS	-0.0378	14.607181752266658	-1.18524	0.26190962580922994	0.5524906010037193	-5.78499	14.80708820210736	14.796703428300887	14.80897596881406	14.722283876006228	14.825793245437248	14.75129060771585	14.415066195936127	14.409985070331976	14.461798230463252	14.451340811597872	14.44622789922158	14.389627491267465
Con_Pmod_vs_Con_Scr	A1L390|643	A1L390	PLEKHG3	S	643	SRSSSVLSLEGSEKG	0.00691682	13.546937999356373	0.14574995584369874	0.8868634330046354	0.9542207999643331	-6.47816	13.687725332441609	13.771187372158789	13.731974640260686	13.663132852451898	13.840089869544435	13.70841507978344	13.269811546050578	13.208053665489002	13.30306562113342	13.457095052867995	13.507620631984368	13.41508432811026
Con_Pmod_vs_Con_Scr	A1L390|647	A1L390	PLEKHG3	S	647	SVLSLEGSEKGLARH	0.17330536756312664	7.150317051742107	3.8486094070296377	0.00291366	0.0560836	-1.60346	7.101679037662854	7.041092433369268	7.106655660413472	7.282405048530563	7.239904401373331	7.24703	7.05611	7.069390946776482	6.925110540173892	7.205699750116076	7.204935104536476	7.323791709508616
Con_Pmod_vs_Con_Scr	A1L390|741	A1L390	PLEKHG3	S	741	FSVRRRESLSYIPKG	-0.118641	12.297812867666064	-2.43992	0.033666956593232725	0.2034816057832747	-3.97858	12.148235800937227	12.26273477355489	12.216823159010078	12.03815614470944	12.175857696280744	12.057856081104434	12.460394267251612	12.466677388140958	12.368919907588808	12.405334582330712	12.447589996943975	12.525174614139887
Con_Pmod_vs_Con_Scr	A1L390|76	A1L390	PLEKHG3	S	76	LNVKGPLSPFNSRAA	0.023437720339391177	16.7514	0.5249168411606236	0.6104832170840016	0.8191073862074426	-6.34404	17.09375465665948	16.899772761088673	17.028676641878548	17.055038782342145	17.00088910237554	17.036589335927168	16.469889163562982	16.473798518973936	16.49599011307269	16.53409932271184	16.480328410986893	16.44740367175093
Con_Pmod_vs_Con_Scr	A1PQG8:Q9UQ35|235:204	A1PQG8:Q9UQ35	POLM:SRRM2	S	235:204	VRRSESSSPRSSGSV:GRRSESSSPRRERKK	0.1353028972504493	11.15132105447794	3.1111971634360422	0.010369683437002505	0.10767016134876092	-2.84784	11.0426	11.098449751850929	11.075882886036831	11.124924916123224	11.322128902316676	11.17577554618831	11.132861168579204	11.177777170934093	11.157846625799465	11.17537851119377	11.165894219836485	11.166344919887193
Con_Pmod_vs_Con_Scr	A1X283|291	A1X283	SH3PXD2B	S	291	PPKPGPGSPSHPGAL	0.0694788	15.704690096185388	2.385232668030781	0.0370373	0.21335965492571876	-4.06846	15.648982585020018	15.611871506395488	15.662014552715382	15.71221643117743	15.723720880734383	15.695367855332604	15.719617535454248	15.679631012278252	15.634068706825044	15.761618657889318	15.787830438712575	15.819340991689916
Con_Pmod_vs_Con_Scr	A2A2Y4|313;314	A2A2Y4	FRMD3	S;S	313;314	AFYKYAKSSQIKTVS;FYKYAKSSQIKTVSS	-0.500831	22.480314625465326	-1.10752	0.2926563608372224	0.5836325673139955	-5.86951	22.10911233775419	23.830171049754203	22.73520127287475	22.709009378036853	21.996818858418415	22.466164073861194	22.7889	21.848271839461056	21.884755165797294	21.70704809175442	22.73628414808138	22.95204794677693
Con_Pmod_vs_Con_Scr	A2A2Y4|416	A2A2Y4	FRMD3	S	416	SAPLISSSPVKAARE	-0.211512	15.7872	-2.56109	0.0272339	0.17974397432010122	-3.77768	15.263479947245887	15.633885152806547	15.316984724547758	15.234916635042172	15.095640258752518	15.249256769816247	16.271107105215094	16.335024650598097	16.370349384259402	16.19183339376454	16.22736507857942	16.25611688709711
Con_Pmod_vs_Con_Scr	A2A2Y4|429	A2A2Y4	FRMD3	S	429	REYEDPPSEEEDKIK	-0.0135898	15.111206808878643	-0.330552	0.7474480256698918	0.8882427049850244	-6.43136	14.303932030227733	14.20121925430721	14.269566107581683	14.198907159698368	14.30455399892108	14.23048694076461	16.047335459085783	16.141417114390787	16.114396004619067	15.894968438810702	15.81320032603434	15.814498872102355
Con_Pmod_vs_Con_Scr	A2A3K4|392	A2A3K4	PTPDC1	S	392	THLKRRLSYSDSDLK	0.0446085	13.68517622149139	0.9019639569863694	0.38718511160922864	0.663918	-6.07061	13.659477890258945	13.837846742771768	13.685339537582196	13.762603607409648	13.764424871615914	13.78946118138659	13.61389129469468	13.749252692177697	13.66824983946829	13.558247076296404	13.52169741798459	13.611622506249963
Con_Pmod_vs_Con_Scr	A2A3K4|413	A2A3K4	PTPDC1	T	413	EQGETPQTVPAQILV	-0.0395841	21.907489486162046	-0.803675	0.43930032478783676	0.7059610770878312	-6.15436	22.08815319515881	22.049882569079426	22.030990627617744	22.003090922058615	22.00808506135317	22.039098138162473	21.668882667826463	21.781259132072165	21.851565634298545	21.874570401634543	21.77731763211569	21.716977852566888
Con_Pmod_vs_Con_Scr	A2AJT9|100	A2AJT9	BCLAF3	S	100	YKPHRGYSPGRGDSN	0.014713616197651547	14.788476294729884	0.2647173049808121	0.7963224450322692	0.9136668179073004	-6.45215	14.820952201239947	14.583619978496523	14.740855124403062	14.75481920708964	14.698376666294044	14.736372279348808	14.864902774159102	14.843130573010717	14.914871762360557	14.897522569043131	14.842756916150178	14.7635
Con_Pmod_vs_Con_Scr	A2AJT9|139	A2AJT9	BCLAF3	S	139	QKVQGGHSPDDHRVR	0.021522849873072403	16.89730286357318	0.4899478128885795	0.63419	0.8332973543974226	-6.36256	16.949707971786697	16.760783909862305	16.890763758156446	16.893866341657606	16.885418788243065	16.886539059524008	16.921128330778693	16.923144199584495	16.954976388580143	16.950249076774636	16.89845417932456	16.852602358605505
Con_Pmod_vs_Con_Scr	A2AJT9|192	A2AJT9	BCLAF3	S	192	SQSTRRGSEDFETRS	-0.123041	18.439136637914864	-2.746	0.0196837	0.15058724338130106	-3.46746	18.35091058115678	18.359129316401123	18.34902128642486	18.169338079555285	18.30386211857768	18.216738211810227	18.66178157273123	18.659385731880157	18.76841475202119	18.519749355870857	18.508549793850115	18.40275885469884
Con_Pmod_vs_Con_Scr	A2RRH5|452	A2RRH5	WDR27	S	452	DQRLVFHSKVRSSGY	-0.0277425	15.412156378818185	-1.04254	0.32044007279298825	0.6073821023646532	-5.93671	15.38143934377806	15.384618286756362	15.38785695422093	15.32902080769971	15.396399026439218	15.345267263378243	15.467449302297387	15.517762506510255	15.466836453815326	15.42682436873294	15.403183584044646	15.43921864814514
Con_Pmod_vs_Con_Scr	A2RRP1|1937	A2RRP1	NBAS	S	1937	EKPRKRNSEDEAQEA	-0.0553673	17.29532830408699	-0.71316	0.49120587149338224	0.7447642434772163	-6.22392	17.277918706971445	17.415435279245386	17.317147871046508	17.153129297510915	17.43931963213386	17.251951050195814	17.144966853249503	17.143666314811075	17.317921177832623	17.407723488360507	17.41937501676526	17.25538496092099
Con_Pmod_vs_Con_Scr	A2RRP1|473	A2RRP1	NBAS	S	473	EDEGEEDSDSDYEIS	-0.0118317	16.86112689259098	-0.150173	0.8834579148680333	0.9532159944628118	-6.47746	16.949039305237392	16.78363428062975	16.898337222021045	16.912068240211696	16.812338443852166	16.871109151403395	16.91853341959034	17.108169603554988	16.817301165955847	16.75628545434343	16.632966075774345	16.873740348517376
Con_Pmod_vs_Con_Scr	A2RRP1|523;524;525	A2RRP1	NBAS	S;T;T	523;524;525	YRLVSLRSTTPEELY;RLVSLRSTTPEELYQ;LVSLRSTTPEELYQR	0.0510774	22.2761	0.7589384906552054	0.464492	0.7231363949800764	-6.18967	22.30709993886944	22.350365877872207	22.37944424757341	22.38323047654083	22.44551231715145	22.361399543368215	22.080367369993155	21.793700914965672	21.938543115808137	22.34561355734845	22.529205503472355	22.398662527820676
Con_Pmod_vs_Con_Scr	A3KN83|815	A3KN83	SBNO1	S	815	GLGSKRPSFSSTPVI	-0.0435798	13.448360180490033	-1.22742	0.24632394471549612	0.5369015968039216	-5.73729	13.388869127062732	13.393264931457106	13.384544480037144	13.402512048895732	13.268929221657183	13.364497908844337	13.569098412998295	13.556489265406007	13.51323551359224	13.486546874541824	13.50019985110732	13.552134530280478
Con_Pmod_vs_Con_Scr	A4D0S4|1266;1274	A4D0S4	LAMB4	Y;T	1266;1274	NEQLKAVYEFQDLKD;EFQDLKDTIERAKNE	0.00226838	15.60700310439987	0.0620975	0.9516448263087425	0.9803685661250784	-6.48745	15.354473753172003	15.327562002463072	15.324452245415552	15.362228156305637	15.295453403865515	15.355611587128587	15.948611600895722	16.063514495715886	15.971367243295086	15.779545688618922	15.708309662120818	15.792907413801649
Con_Pmod_vs_Con_Scr	A4D1S0|158	A4D1S0	KLRG2	S	158	LKVPVPESPAFSRHA	-0.191116	20.01575333095584	-2.35074	0.03933	0.2202388231244512	-4.12487	20.571087608526312	20.91488801801844	20.616935234113217	20.48015535214359	20.50584489312041	20.543563532938315	19.386041822016885	19.592825039390753	19.543158054580463	19.35159686505061	19.301100648088234	19.381842903482816
Con_Pmod_vs_Con_Scr	A4D2B0|61	A4D2B0	MBLAC1	S	61	PASSHRESPRGSGGA	-0.20425	15.408685489533067	-4.84863	5.753268400470735e-4	0.026187290650418516	-0.0031802	15.290373987638429	15.2937	15.280828863179185	15.16252741450818	14.976971481825643	15.112626065945642	15.855109146859029	15.802043316722164	15.803259796313476	15.413974599060367	15.446456710075966	15.466383244521726
Con_Pmod_vs_Con_Scr	A5YKK6|1481	A5YKK6	CNOT1	S	1481	ASALRTASPQQREMM	-0.000465025	13.997753728725401	-0.0165793	0.987081	0.995117	-6.48936	13.956531670491826	13.907255894462676	13.94205634692178	13.94624578754228	13.920883975496425	13.937319072450986	14.026944988725976	13.97020551220962	14.037110859493469	14.119044585908808	14.134445475905832	14.075000575095132
Con_Pmod_vs_Con_Scr	A5YM69:Q12774:A0A2R8YFR7:A0A5F9ZGZ6|57:57:57:57	A5YM69:Q12774:A0A2R8YFR7:A0A5F9ZGZ6	ARHGEF35:ARHGEF5:LOC107987545:NA	S	57:57:57:57	WREEHRLSATQQSEL:WREEHRLSATQQSEL:WREEHRLSATQQSEL:WREEHRLSATQQSEL	-0.208603	13.868266433767007	-5.24786	3.129091550101565e-4	0.019372747886439383	0.5958337915099143	13.917481308447206	13.79254272543854	13.868418876662115	13.687998363926402	13.60088573232384	13.663750935432375	14.006280625119436	14.07756298187943	13.998287675458691	13.958734462561162	13.891336370067304	13.955917147887568
Con_Pmod_vs_Con_Scr	A6ND36|356	A6ND36	FAM83G	S	356	YALVKAKSVDEIAKI	-0.143374	20.40223293953996	-1.7229	0.11401636223265821	0.3732678525473929	-5.09435	20.528118329997103	20.632815825694102	20.5384	20.36959620738051	20.472807120496483	20.426774180480077	20.2336	20.10897157907267	20.42734956128618	20.412411667057835	20.472472201129968	20.203503811922506
Con_Pmod_vs_Con_Scr	A6ND36|610	A6ND36	FAM83G	S	610	GPGPRRPSVASSVSE	-0.0560706	14.795128470023718	-1.87149	0.0892139	0.3300515848092396	-4.87712	14.790830237611877	14.805507617092657	14.819389004493535	14.719395771558702	14.800682280956748	14.727436964095965	14.842886775583697	14.775425167780051	14.80410783618813	14.798689418446031	14.845404654303664	14.811785912173557
Con_Pmod_vs_Con_Scr	A6ND36|634	A6ND36	FAM83G	S	634	VPLRRRHSEQVANGP	0.0655954	12.999677135417585	1.151202697681059	0.2750466453852861	0.5658853124112364	-5.82255	12.85791219521984	13.06504740060748	12.89481878035538	12.999958657793432	12.9921	13.022462109832103	13.022858039223545	13.168195623026977	13.051668320103635	12.952953470405676	12.922061088562511	13.046046051684048
Con_Pmod_vs_Con_Scr	A6ND36|650	A6ND36	FAM83G	S	650	PPPRRQLSAPHITRG	-0.00603286	14.867037923176436	-0.221911	0.8286162449741135	0.9285	-6.46323	14.87251344033271	14.927346580264247	14.876648531495224	14.869072545323611	14.899712508820167	14.889624925266794	14.846887196892547	14.916729201489924	14.89073775235654	14.816237099205484	14.786613793561402	14.812331503108592
Con_Pmod_vs_Con_Scr	A6NDB9|375	A6NDB9	PALM3	S	375	GRERGDESPLGAEGA	0.12581405069489282	6.538197221955258	2.2170628750557198	0.049583260196761604	0.24772862778094368	-4.34107	6.741722892895616	6.557851335970353	6.738793973207795	6.8179086396985955	6.825613994510656	6.772287719949186	6.185122549569357	6.104588402532849	6.003181524550644	6.531238887360983	6.559268240467518	6.620788502749538
Con_Pmod_vs_Con_Scr	A6NFI3|112	A6NFI3	ZNF316	S	112	SRGGDAKSPVLQEKG	0.00867041	16.052339828714985	0.22953625406387823	0.8228370410048053	0.9259884429411214	-6.4614	16.01181264123212	16.070089655422425	16.028639660559996	16.045910059367475	16.041489661246022	16.04915346648111	16.012416682602296	15.911490005277583	16.039632393794964	16.13221314943778	16.193804162540186	16.091426406617845
Con_Pmod_vs_Con_Scr	A6NFI3|540	A6NFI3	ZNF316	S	540	TDPGPEGSEVGEADG	0.3717031708867111	15.425769622023415	4.489490975146017	0.00101444	0.0344477	-0.562485	15.297881197027309	15.217998622340254	15.245527912257009	15.501055616057098	15.771240614450626	15.604221013776982	15.228061642839265	15.465199747972193	15.462641654945024	15.565366935859736	15.391208641132875	15.358831865622614
Con_Pmod_vs_Con_Scr	A6NIX2|96	A6NIX2	WTIP	S	96	PRASLAGSDGGGGGG	0.0489205	12.124149772687767	0.9972972028198429	0.34092288327066833	0.6245915418699267	-5.98155	12.027652027977329	11.963622172966328	12.005277393888312	12.039579587300338	12.060349806516998	12.043383764065917	12.22159715737219	12.380246374950955	12.203060643093584	12.196916585543915	12.10300323318005	12.24510852539729
Con_Pmod_vs_Con_Scr	A6NKD9|246	A6NKD9	CCDC85C	S	246	KAGATRRSLDDLSAP	0.0791344	18.087532485236373	2.8186296450455424	0.017325013901095445	0.14293136468403742	-3.34474	18.074981790591124	18.138559102445463	18.082032239950617	18.153517592432006	18.200050958182143	18.179407788362777	17.929595691392286	17.992309211152175	17.983507934657638	18.11879745451559	18.093665667618417	18.103964391536223
Con_Pmod_vs_Con_Scr	A6NKF1|402	A6NKF1	SAC3D1	S	402	EGTDRPGSPA_____	0.0276096	16.20362738982234	0.882125	0.3973436665977814	0.6722553703012965	-6.08818	16.108250425125274	16.003083347879503	16.089489309747812	16.094230891506058	16.106007585619434	16.0834	16.34740886260707	16.36496311801373	16.305277026456586	16.31931076625763	16.292372675199694	16.329721303962383
Con_Pmod_vs_Con_Scr	A6NKF1|41	A6NKF1	SAC3D1	S	41	RDAERPPSPRSPLMP	-0.0822342	9.71074	-2.16708	0.054041695123127766	0.25883540479872513	-4.42081	9.56319	9.458328791104782	9.563964541169842	9.41032	9.514570594839082	9.4139	10.01122514655407	9.994154116877368	9.95008	9.881302970519416	9.877654638889798	9.890221050641514
Con_Pmod_vs_Con_Scr	A6NMK8|100	A6NMK8	INSYN2B	S	100	RNIAIQTSPSLRKHF	-0.0165205	8.172794916072558	-0.114004	0.9113728833751072	0.965414	-6.48256	8.137449713842432	7.55124	7.979021282604775	8.07141	7.646362537191022	7.900373230703568	8.726910970468955	8.691606194045363	8.475330373051856	8.30253	8.212682898109232	8.378621770475046
Con_Pmod_vs_Con_Scr	A6NMK8|17	A6NMK8	INSYN2B	S	17	PVLLKRNSLESVEFV	0.022117517251158958	13.33645336117091	0.43489100884573967	0.6723947808563291	0.8539797077292465	-6.38925	12.86776436492254	12.84678199642881	12.834207360831822	12.952482290142433	12.751232145533796	12.911391838260416	13.95423874854012	13.865090280277414	13.987192080581629	13.695741373376006	13.726829310220658	13.64448854493529
Con_Pmod_vs_Con_Scr	A7E2V4|1130	A7E2V4	ZSWIM8	S	1130	YNGRGWGSPGRPKKK	0.0958065	13.771029734487263	1.5010598281727674	0.16263344340881447	0.44263122742192806	-5.39948	13.806080050836686	13.516442034238429	13.73187989398015	13.835975939584358	13.725879828812015	13.78	13.852324724612531	13.852191689620646	13.767151640695184	13.81564375597267	13.7582	13.810642526849175
Con_Pmod_vs_Con_Scr	A7E2V4|1156	A7E2V4	ZSWIM8	S	1156	PETTSDSSPTLSRRP	0.0745581	12.573689499233987	0.7315551449615395	0.48035868652497915	0.7359255643140349	-6.21039	12.540884708995517	12.48162433331546	12.534759410073374	12.7846	12.35794890586444	12.638396176020583	12.745757944499008	12.589673596823276	12.481325296219971	12.46617596419436	12.56646991119181	12.696660139394943
Con_Pmod_vs_Con_Scr	A7E2V4|1202	A7E2V4	ZSWIM8	S	1202	SSGSRRASASGGARA	-0.0412758	14.466241999766861	-1.73164	0.11239968253352074	0.3705484039566618	-5.08183	14.432358409294476	14.441639195585353	14.434580565631974	14.406409632643276	14.38012490469124	14.398216280522716	14.678580710225798	14.701787671369852	14.654533995774182	14.345198995110024	14.3387	14.382746960453856
Con_Pmod_vs_Con_Scr	A7E2V4|1204	A7E2V4	ZSWIM8	S	1204	GSRRASASGGARAKT	0.0765899	14.417367427603123	1.2560098385427485	0.2361883074085644	0.5276064337373044	-5.70425	14.276100508857626	14.426955878959047	14.358098894580223	14.45861738756014	14.410285943674268	14.422021579010815	14.549473358616256	14.337271539725712	14.398825449556105	14.355458558664914	14.524965769923464	14.490334262108908
Con_Pmod_vs_Con_Scr	A7E2V4|48	A7E2V4	ZSWIM8	S	48	WRGWRKQSAGPNSPT	-0.0123708	15.239911562474514	-0.395768	0.7001542008794767	0.8676085735937747	-6.40635	15.159298974551067	15.170186836663479	15.16072393761327	15.112295600712972	15.200087544705392	15.140714114261094	15.394932136970858	15.481740874206771	15.42740113359337	15.228227092162143	15.182550308075903	15.220780196177856
Con_Pmod_vs_Con_Scr	A7E2V4|53	A7E2V4	ZSWIM8	S	53	KQSAGPNSPTGGGGG	0.0671734	15.36055306338349	1.9573540223591062	0.0772489	0.3074121185817543	-4.74758	15.254934420425272	15.255726537228618	15.230438780923762	15.293374595839053	15.325988140287448	15.323257277589873	15.413206778238491	15.474278989209344	15.527960168677772	15.457818774770024	15.408259740018108	15.361392557394108
Con_Pmod_vs_Con_Scr	A7E2V4|567	A7E2V4	ZSWIM8	S	567	QRGPRRLSAEGGDKA	-0.0460834	16.722178346954568	-0.976714	0.35055400604899745	0.6333856060794439	-6.00141	16.684358020474086	16.72341461212982	16.68859037063666	16.601411932335033	16.711480520680198	16.64522036840113	16.788621716361863	16.755781955930058	16.900213587243133	16.758594322779135	16.769126745709816	16.63932601077389
Con_Pmod_vs_Con_Scr	A7KAX9|1805	A7KAX9	ARHGAP32	S	1805	PGKTGLLSVAEGKES	0.0718443	15.760436019873971	1.4110784317967004	0.18699567399421851	0.47358842991628636	-5.51568	15.677889046310028	15.571910688667543	15.640302212300202	15.65980687819524	15.75401426034112	15.691813786919248	15.767978197045652	15.750314801992856	15.878591624424638	15.97551164112613	15.943434960360834	15.813664140804166
Con_Pmod_vs_Con_Scr	A7KAX9|892	A7KAX9	ARHGAP32	S	892	EKVVYAFSPKIGRKL	-0.057325	14.675246651422455	-1.50647	0.16125919780667525	0.44116505928458305	-5.39235	14.81564185323241	14.819580969564557	14.85080306324974	14.713983880499937	14.86513454461922	14.7349	14.556161566077389	14.540559023250902	14.499592617028108	14.548884199088326	14.57072537223404	14.586960369787834
Con_Pmod_vs_Con_Scr	A8K2U0|230;231;235	A8K2U0	A2ML1	S;T;S	230;231;235	VVEPKELSTVQESFL;VEPKELSTVQESFLV;ELSTVQESFLVKICC	0.0871253	13.711845590888004	1.3253548867953313	0.21301106052617347	0.503266	-5.62184	13.814383906614584	13.668116624822876	13.73655330482055	13.950487130086664	13.652846002249897	13.877096731312912	13.684750947649908	13.712555015550349	13.66458076579925	13.608821357628695	13.555970227338705	13.615985076781662
Con_Pmod_vs_Con_Scr	A8MU93|54	A8MU93	C17orf100	S	54	RSEGPSLSPSGKRLP	-0.000457146	12.558339438769227	-0.00759903	0.9940785547222284	0.9982540941177266	-6.48948	12.49437103013094	12.221890721251128	12.4452	12.415298833405371	12.37627821713951	12.368492622835635	12.861876361027406	12.756673564847851	12.76448406430764	12.673371625267878	12.678093425606074	12.644063438211584
Con_Pmod_vs_Con_Scr	A8MVW0|446	A8MVW0	FAM171A2	S	446	AGLKGARSAEGPGGL	0.0887751	14.407642552626157	1.638719715191246	0.13068826053854266	0.40182232170162047	-5.21305	14.47579991109958	14.318405943452078	14.441818099474297	14.581164519215513	14.41045995457757	14.510724667263233	14.390780397052875	14.339451707160505	14.261711260341787	14.360714185000576	14.367070954673258	14.433609032202613
Con_Pmod_vs_Con_Scr	A8MVW0|780	A8MVW0	FAM171A2	S	780	SRGDSSRSSASELRR	0.13231306657738706	10.835642182821823	2.3472035457673694	0.0395724	0.2202388231244512	-4.13064	10.842829810941891	10.78049299274706	10.867498670116122	10.886632923088897	11.088816761553431	10.912310988894898	10.5549	10.617749009114924	10.469534030117268	10.990022149492392	10.961336129041076	11.05561371305003
Con_Pmod_vs_Con_Scr	A8MVW0|789	A8MVW0	FAM171A2	S	789	ASELRRDSLTSPEDE	0.1556519843307438	13.781897523468036	4.8490773557996905	5.749287626862386e-4	0.026187290650418516	-0.00249831	13.696891041226571	13.6492	13.703520603857273	13.818364424045791	13.87964194548886	13.81853746781642	13.618949553518332	13.643896042746256	13.558987572162044	13.987310888538548	13.974308056716277	14.033186446225058
Con_Pmod_vs_Con_Scr	A8MW92|433	A8MW92	PHF20L1	S	433	DSVEKVSSPSPATDG	-0.0044917	12.625849118115216	-0.136825	0.8937429838109898	0.9567275473445029	-6.4795	12.664851640269353	12.621445064816289	12.678059199767702	12.606416670175738	12.723441728223769	12.621022417591025	12.569741608833109	12.56206864734179	12.531967391024644	12.639903476677569	12.642477256674988	12.648794315986608
Con_Pmod_vs_Con_Scr	A8MXZ4|435	A8MXZ4	GPRC5C	S	435	GKNSQAQSPQSKTRW	0.12308476480584751	14.185344787209935	1.2757273905292945	0.22939792975745796	0.5211794617553261	-5.68115	14.077526036661885	13.89368191792429	14.07337140080907	14.276087119759454	13.996883010489164	14.140863519564157	14.478176299572638	14.302486462824064	14.151123400575624	14.170113294848765	14.264625266946274	14.399199716543835
Con_Pmod_vs_Con_Scr	A8MZ26|168;169	A8MZ26	EFCAB9	Y;T	168;169	FKLYTIIYTDKLQKR;KLYTIIYTDKLQKRQ	0.0452147	17.585410162049094	1.609453029688708	0.1369742880420122	0.4091387739470017	-5.25351	17.60394992871844	17.541628444284484	17.589539142735603	17.647540548931595	17.59767166224854	17.625549413657875	17.55313581250502	17.562076554187172	17.507461136805155	17.592596825584682	17.579471432998734	17.624301041931837
Con_Pmod_vs_Con_Scr	A9Z1X7|547	A9Z1X7	SRRM1	S	547	QMGKRWQSPVTKSGR	-0.027373	18.03953589872362	-0.592289	0.5661220792317274	0.7914009327890049	-6.30496	18.04847445364385	17.983139806647948	18.047315500003517	18.00797461966934	17.998130323480343	17.99070593944963	18.111423686006113	17.9455	18.088304321269874	18.078167397265716	18.15216956102016	18.02317021355877
Con_Pmod_vs_Con_Scr	B1AJZ9|935;938;947	B1AJZ9	FHAD1	T;S;T	935;938;947	QIKQHAQTIVSLEEK;QHAQTIVSLEEKLQK;EEKLQKVTQHHKKIE	-0.32636	13.822482416889242	-2.22648	0.0487834	0.2462626516499809	-4.32597	13.816483722512109	14.259395380096036	13.912310444043625	13.483351238297594	13.87081273678288	13.65494642949744	13.621735583480032	13.59872293995112	13.983973109575288	13.951128491484358	14.017994104948192	13.698934822002231
Con_Pmod_vs_Con_Scr	B1ALY0|383	B1ALY0	PALM2AKAP2	S	383	SDTTEPSSPEGKEES	0.032557871140461714	15.885677446969506	0.6201556714738783	0.5483034130811556	0.7810669375826766	-6.28751	15.77464948936466	15.873824147607827	15.839693459032206	15.802642807510953	15.954499127923947	15.828698773991176	15.956191829895603	15.811855987228029	15.925119868644384	15.917347332344484	16.024389211299184	15.919217328791616
Con_Pmod_vs_Con_Scr	B2RBV5|18	B2RBV5	MRFAP1L2	S	18	EPREEPGSPLSPAPR	0.10395271117880966	15.520358524885328	1.9859681583399973	0.0736059	0.3003606830011191	-4.70382	15.5095	15.359500609682696	15.432664954674822	15.620882087520943	15.416918243006334	15.575769396839965	15.573456283658818	15.606283181348124	15.602702039295131	15.55314922468889	15.490853380454352	15.502576867980556
Con_Pmod_vs_Con_Scr	B2RBV5|21	B2RBV5	MRFAP1L2	S	21	EEPGSPLSPAPRAGR	0.19716716922461863	15.960519676516528	6.228918470797052	7.708289387034706e-5	0.00987858	1.9622281423474268	15.871968070484556	15.913203385248789	15.891771804515148	16.06740154337795	16.122062163370604	16.07898106117378	15.967911893301904	16.028502174436667	15.94029662283314	15.867575258523557	15.85181543246185	15.924746708470378
Con_Pmod_vs_Con_Scr	B2RTY4|1258	B2RTY4	MYO9A	S	1258	LVRERPRSLEDLHQK	-0.0162654	16.044046946489196	-0.330262	0.7476609991362488	0.8882427049850244	-6.43147	16.076367595476086	16.152679166803246	16.058422617895623	16.03629987748388	16.10874832204762	16.093625050265143	15.898952227258636	16.02723509011355	16.078930144949542	16.063243020093804	15.987050343751816	15.947009901731398
Con_Pmod_vs_Con_Scr	B2RTY4|1299	B2RTY4	MYO9A	S	1299	VRSLGGISPSEDRRW	-0.0397084	15.270168234640618	-1.56412	0.1472389554526079	0.4226955658926542	-5.31533	15.301875046473713	15.316095692150668	15.301538323899528	15.239432642530176	15.298638719786902	15.262312440908683	15.185095345897276	15.211580973728976	15.2331	15.316245521583411	15.299396593086811	15.27670911474077
Con_Pmod_vs_Con_Scr	B2RTY4|1358	B2RTY4	MYO9A	S	1358	EGDLQFPSPKISSSP	0.019900166508900696	14.2023	0.4478189483980006	0.6633308103388927	0.850537	-6.38326	14.280846557301553	14.142984531362222	14.246203917192114	14.274797629500748	14.21191208202027	14.243025793861564	14.19626910149197	14.251249956394464	14.126145235125216	14.152821245144278	14.10156989648428	14.19960027636972
Con_Pmod_vs_Con_Scr	B2RTY4|1733	B2RTY4	MYO9A	S	1733	AKLHKTMSQGEITKL	-0.0511515	17.561097974579074	-0.864829	0.4063491206846014	0.679824	-6.10323	17.661875375211523	17.61725692720591	17.642043209458926	17.679149972169032	17.469461510138455	17.619109512551823	17.598667317042963	17.418186758298898	17.56513926278548	17.467392028238596	17.550903877894022	17.443989943953238
Con_Pmod_vs_Con_Scr	B2RTY4|1829	B2RTY4	MYO9A	S	1829	FKENKEPSPKAKRKR	-0.0813865	15.60559264819428	-3.01335	0.012307947899975843	0.11738794239861353	-3.01429	15.7051	15.624328267671654	15.684998456166804	15.593423905451576	15.590973646054126	15.58584626910644	15.64250189607521	15.669673655165546	15.624388647215952	15.5256	15.495193071783344	15.525128352349713
Con_Pmod_vs_Con_Scr	B2RTY4|2464	B2RTY4	MYO9A	S	2464	SPFYRAASGNEALGM	0.0750654	12.718604970824833	2.2713377027652446	0.0451421	0.23552418131922503	-4.25377	12.68423143410523	12.623693848119656	12.683974712781303	12.751746919083995	12.73581263679883	12.72953649716764	12.792167541950567	12.795710191289947	12.706311774660607	12.685093337561398	12.682585416922324	12.752395339456507
Con_Pmod_vs_Con_Scr	B2RTY4|755	B2RTY4	MYO9A	S	755	QHPVHQRSLEILQRC	-0.0599608	10.707479953994014	-0.914994	0.38061281910578537	0.6584659324154416	-6.05888	10.356736992691117	10.563215258889173	10.38469028940119	10.46089112980088	10.23947335319756	10.424395600728438	11.046066851322678	11.0638	11.023873574980117	10.922485689342322	10.96093630400457	11.04314793933141
Con_Pmod_vs_Con_Scr	B3KS81:O95218|382:268	B3KS81:O95218	SRRM5:ZRANB2	S	382:268	RDHRGSSSPRKESGR:RSHRGSSSPRKRSYS	-0.137875	17.544607699976908	-1.38954	0.19326664006784688	0.4802277743796192	-5.54279	17.52	17.493766350701204	17.535234832320246	17.338575815482493	17.439270388691593	17.3576	17.6666	17.354257232096202	17.73930798174318	17.71391981641533	17.859910786341334	17.516801966256708
Con_Pmod_vs_Con_Scr	B3KU38:P0DPB3|193:117	B3KU38:P0DPB3	IQCJ-SCHIP1:SCHIP1	S	193:117	RGYRDDRSPAREPGD:RGYRDDRSPAREPGD	-0.0235914	17.350004725069716	-0.904015	0.38614548021967743	0.6629969223334732	-6.06877	17.33537869429027	17.38451542107631	17.35243315691768	17.346319545952163	17.318275251848217	17.336958147750263	17.308734947342753	17.31128393393059	17.27128284493239	17.387044418334145	17.402928969605675	17.44490136885615
Con_Pmod_vs_Con_Scr	B3KU38:P0DPB3|406:330	B3KU38:P0DPB3	IQCJ-SCHIP1:SCHIP1	S	406:330	TSLDTPLSPMSKQSS:TSLDTPLSPMSKQSS	0.0809468	17.06813815577923	0.9253049521361142	0.37546794806926975	0.6543671658983841	-6.0495	16.979569145625536	17.2665	17.106690049369327	17.048173250490965	17.407680795194295	17.139772650765863	16.742292299019955	16.745903413338624	16.73607218581973	17.165496559476427	17.24135363557944	17.23812686162232
Con_Pmod_vs_Con_Scr	B4DDD6|207	B4DDD6	DBNL	S	207	QEQGGEASPQSRTWE	0.019284223714196358	13.65813010120075	0.6303673324297024	0.541854	0.7771049249435298	-6.28092	13.613550081789088	13.681459895018646	13.632105046835362	13.646032368796122	13.679637822739686	13.659297503249876	13.729448894062022	13.79651580579387	13.725069375368804	13.568021527037615	13.55094803079007	13.615474862927838
Con_Pmod_vs_Con_Scr	B4DR80|4	B4DR80	STK24	S	4	____MAHSPVQSGLP	-0.0110464	15.109279695274351	-0.41108	0.6892322141205949	0.8617191512944758	-6.39984	15.04992934461468	14.984639277272048	15.043337175229563	15.032375706114587	15.002107897691705	15.010282958642032	15.221597566559778	15.18658502122614	15.163987380294486	15.193123565299857	15.20448219728517	15.218908253062166
Con_Pmod_vs_Con_Scr	B4DS77|337	B4DS77	SHISA9	S	337	EDEPRAFSPEHGPAK	0.0550632	18.077248260700927	1.0070628867020808	0.3364218612186771	0.6216538886008108	-5.97201	18.016295456671653	17.90975430989882	17.99828237186977	17.94927024806816	18.14558489019524	17.99466668608286	18.01309310862768	18.142231457411985	18.04478860168918	18.28306535070961	18.19014775005741	18.23979889712875
Con_Pmod_vs_Con_Scr	B4DS77|350	B4DS77	SHISA9	S	350	AKQNGQKSRTNKMPP	0.024703042759499638	10.94044019772306	0.29881625320140615	0.7708780081685455	0.9011326344159405	-6.44195	10.916393538024105	10.612837527102734	10.888113920139077	10.897058579332258	10.790820673388309	10.803574860823844	11.175768435833843	11.009580358544856	10.920274954002537	11.038124874164248	11.091469719785598	11.14126493153531
Con_Pmod_vs_Con_Scr	B4DY08|107	B4DY08	HNRNPC	S	107	SAAEMYGSSFDLDYD	-0.00963971	14.426304623153996	-0.202929	0.8430475958615579	0.9346150372071811	-6.46752	14.359775947557528	14.36361456589296	14.39934605171584	14.39719822583962	14.344459396793235	14.352159812521908	14.475133752816824	14.2915	14.326465880546577	14.531527209495268	14.650776185279028	14.623661311230856
Con_Pmod_vs_Con_Scr	B4DY08|149	B4DY08	HNRNPC	S	149	PSKRQRVSGNTSRRG	0.11684241031029252	10.555289838897854	1.5522227966166586	0.1500417665265221	0.4256288791526311	-5.33137	10.605751583645404	10.292194062826654	10.485782746608816	10.66293355165242	10.463648843814996	10.607673228544328	10.515582515155566	10.600696481727836	10.526706849039806	10.699854228841396	10.574618634260943	10.628035340656092
Con_Pmod_vs_Con_Scr	B4DY08|220	B4DY08	HNRNPC	S	220	VEMKNDKSEEEQSSS	-0.0479401	20.108668249373615	-0.845967	0.4163279494087907	0.6871597874495734	-6.11935	20.163930163511075	20.087959727862213	20.134128445389553	20.04358619947761	20.124312249077008	20.074299472385693	20.01114483600192	19.94522430680363	20.131338430340794	20.25533999335306	20.253522514954913	20.079232653325903
Con_Pmod_vs_Con_Scr	B4DY08|225	B4DY08	HNRNPC	S	225	DKSEEEQSSSSVKKD	0.045774	9.541647516536344	1.1747906973973115	0.265888	0.5563918096182884	-5.79661	9.485085644303195	9.381145780025427	9.45473	9.530146937487524	9.431959486393868	9.49618	9.534959546996554	9.441929398571537	9.517254695615012	9.747639078008238	9.771711112206358	9.707034528659378
Con_Pmod_vs_Con_Scr	B4DY08|226	B4DY08	HNRNPC	S	226	KSEEEQSSSSVKKDE	4.6270984528895553e-4	13.950048559214578	0.0111395	0.9913197921363903	0.9971364212604094	-6.48944	13.910702124707305	13.918464051675931	13.932061938499446	13.892588575686828	13.966515861046371	13.903511807685351	13.977818531477176	13.852554816636207	13.979997977604691	14.015763096896958	14.083874123778449	13.966729804880224
Con_Pmod_vs_Con_Scr	B4DY08|227	B4DY08	HNRNPC	S	227	SEEEQSSSSVKKDET	-0.0364874	13.673154681132889	-0.613426	0.552577	0.7827881573795379	-6.29179	13.734677217492957	13.776372138675184	13.746219247742197	13.669237853749925	13.77163537683866	13.706933240652496	13.533162719922416	13.419630525196132	13.637749292747968	13.722113377899973	13.77605414760913	13.58407103506764
Con_Pmod_vs_Con_Scr	B4DY08|240;247	B4DY08	HNRNPC	S;S	240;247	ETNVKMESEGGADDS;SEGGADDSAEEGDLL	-0.0171834	14.098374008336439	-0.428719	0.6767416254199105	0.8566506036242797	-6.39205	14.142723414215984	14.0999	14.149993321414994	14.152513223641115	14.077807011914008	14.110795954344676	14.123862621485792	14.094477278244534	13.99885798759066	14.032932161993855	14.056782054099267	14.139793400176584
Con_Pmod_vs_Con_Scr	B4DY08|247	B4DY08	HNRNPC	S	247	SEGGADDSAEEGDLL	0.025307825690603636	17.918351999294515	1.1765596364660302	0.265211	0.5557003356705864	-5.79464	17.917854461325923	17.907344935318992	17.922391661853872	17.946308452842903	17.939508794546388	17.9377	17.934881508316426	17.91818693324539	17.90213290961248	17.886191813504503	17.89756416638318	17.910161066402832
Con_Pmod_vs_Con_Scr	B4E135|127	B4E135	LIG1	T	127	KRRTEEETPKESLTE	-0.0408076	10.74844415597074	-1.5382	0.15340647489551104	0.4303937012387484	-5.35018	10.743323322596176	10.70021627807152	10.7201	10.673149669145433	10.684570045543705	10.68353935152243	10.8389	10.856346224771997	10.894606247921852	10.76014535914712	10.731915996236305	10.69452342926323
Con_Pmod_vs_Con_Scr	B5MCQ4:Q9Y2W1|68:918	B5MCQ4:Q9Y2W1	DGCR6L:THRAP3	T	68:918	RGYWRSSTSPKRACT:FMFRKSSTSPKWAHD	0.0322628	14.363062770869654	0.741651	0.47446980747794687	0.7308354157817231	-6.20283	14.463733311161342	14.342441409212604	14.411655022627288	14.5023	14.350911697569613	14.46144599246813	14.285613520984736	14.327353217245458	14.265439681871412	14.329987753664222	14.279271006109598	14.336640102254943
Con_Pmod_vs_Con_Scr	B5MCQ4:Q9Y2W1|69:919	B5MCQ4:Q9Y2W1	DGCR6L:THRAP3	S	69:919	GYWRSSTSPKRACTT:MFRKSSTSPKWAHDK	-0.00571859	11.309646121268067	-0.138815	0.8922082762400889	0.9559673351828306	-6.47921	11.323855841371962	11.255385033100788	11.329624225576342	11.309822866452928	11.297118667931016	11.284767786430193	11.396581618687254	11.23993885992506	11.33197281805978	11.29427129843958	11.369449052354051	11.282965386887842
Con_Pmod_vs_Con_Scr	B5MCU0|263	B5MCU0	R3HDM2	S	263	ILKRDDASMDRDDNQ	-0.142491	11.652974821162545	-4.05942	0.00204749	0.048648449997974054	-1.2556	11.594921532109408	11.63198626837168	11.590678267129933	11.45797785862959	11.458998114341334	11.473136165638506	11.911225492001696	11.875378143069886	11.990779822230984	11.638324494801717	11.652668593976486	11.559623101649317
Con_Pmod_vs_Con_Scr	B7Z493|50	B7Z493	FGD4	S	50	PAKHSAASPKPQVPP	-0.244506	17.807871510225826	-2.89941	0.015032571419430905	0.1321104811827483	-3.20786	17.95534326191094	17.846511647647997	17.96148611046347	17.803710884081614	17.538	17.688161518172087	17.84315740808137	17.54464390466068	17.614076201297408	17.87491192904751	18.03512887333033	17.9894
Con_Pmod_vs_Con_Scr	B7Z503|2	B7Z503	BTBD10	S	2	______MSLHGASGG	0.10187552339486672	11.528987657708418	2.4681107886098603	0.0320487	0.19723092110011328	-3.93204	11.478035379056704	11.361154825946478	11.453983075299709	11.482889589651064	11.607353326593636	11.50855693424279	11.520063922388111	11.58414399974198	11.54405660553321	11.641376451088608	11.579296897741347	11.586940885217372
Con_Pmod_vs_Con_Scr	B7Z757|6	B7Z757	TFEC	T	6	__MLQALTGLQFQLK	0.0458994	19.087125920203363	1.7989254532559262	0.10063360486787765	0.3506767645871132	-4.98436	19.0982	19.071355599065697	19.078376464213108	19.144001520952912	19.10309893001918	19.13852838663295	19.054370412085436	19.109187053312635	19.067650800819617	19.07290076411574	19.03497213624704	19.072870290200047
Con_Pmod_vs_Con_Scr	B7Z7F3|151	B7Z7F3	RANBP3	S	151	PDTAAWRSPSEAADE	-0.105167	15.577165226251482	-1.58753	0.14185667385419387	0.41503942482749706	-5.28354	15.67956323401571	15.84979389959191	15.728451029281148	15.545431501557951	15.770814647518485	15.626061685110288	15.249558370006364	15.238918453447448	15.382301549677356	15.6413	15.670794063882044	15.542975620849084
Con_Pmod_vs_Con_Scr	B7ZA25|2	B7ZA25	PRKG2	S	2	______MSNWKLSKA	0.10325982422879676	15.787963707922831	1.2280682780650427	0.24608889641096995	0.5366679653890825	-5.73654	15.661314970667028	15.813162250110176	15.652306967544428	15.746139518018245	15.858231726559168	15.832192416430605	15.74552267849549	15.783556441427836	16.03573042101425	15.8635	15.834811419525249	15.62913897937539
Con_Pmod_vs_Con_Scr	B9A054|7	B9A054	RHBDD1	S	7	_MRRQNVSNQQQNKH	-0.0178759	17.87389944066363	-0.621436	0.5474927330124537	0.7807804749097222	-6.28669	17.861160645686564	17.87694294421931	17.877191312086058	17.88149628137302	17.824720538072526	17.855450485316613	17.8927	17.837671439672526	17.820526437750605	17.88398940371634	17.926821153390822	17.948093751972397
Con_Pmod_vs_Con_Scr	C9J069|109	C9J069	AJM1	S	109	GLTPAPASPPVLPRR	0.012821677478724425	14.370021608856417	0.33754206459219654	0.7423219368604721	0.8855809760975085	-6.42889	14.37552151127893	14.421431334713722	14.409733898143507	14.439056290159105	14.39565526230252	14.4104	14.36422165544898	14.323130523457522	14.24819023171973	14.293638238215552	14.34392523402554	14.415314902701205
Con_Pmod_vs_Con_Scr	C9J1G9|5	C9J1G9	ATAD2B	S	5	___MRLPSLLSYRAV	-0.104072	18.633355467151425	-2.23231	0.0482948	0.24528343941993674	-4.31662	18.628316001843743	18.427936938454405	18.59378696306756	18.460814315288044	18.447039065515124	18.429971864057773	18.708176313729297	18.62454745988481	18.640709230960013	18.887273633910368	18.893655794822337	18.858038024283637
Con_Pmod_vs_Con_Scr	C9J6P4|546	C9J6P4	ZC3HAV1	S	546	KDMLRTGSQSLRNLV	0.095343	13.333465688803184	1.1155388855227215	0.28936052810189633	0.5802049843234867	-5.861	13.240169162074832	13.425038216247607	13.20784435913428	13.335688784171865	13.394841264248614	13.428550598913564	13.256116377737476	13.526537250367657	13.579419834991509	13.309057990786458	13.161202142414757	13.137122284549587
Con_Pmod_vs_Con_Scr	C9J8D8|117	C9J8D8	SPEG	S	117	GTRRLPGSPSSVPQS	0.011627955656715372	14.058751475909986	0.5542847661258891	0.5909281094554331	0.8054991668944164	-6.32755	14.01865767242011	14.01096166965625	14.013933771920913	14.026667897291349	14.024562015246616	14.027207068429467	13.986032239209688	14.011145799794408	13.988194814064045	14.202998774160646	14.187750114314849	14.206905874411488
Con_Pmod_vs_Con_Scr	C9JKI3|6	C9JKI3	CAV1	S	6	__MADELSEKQVYDA	-0.0357483	17.20281311432947	-1.3267	0.2125822516024185	0.5028827457261513	-5.62022	17.345363832882253	17.32714364457218	17.34180638128768	17.271094327472795	17.34376189422158	17.292212882419943	17.01199070615306	17.018312739619006	17.050467390696536	17.16441715511576	17.15216937435064	17.11501704316221
Con_Pmod_vs_Con_Scr	C9JLW8|21	C9JLW8	MCRIP1	S	21	KRTSSPRSPPSSSEI	0.0179253	15.745987201652689	0.4061335502301732	0.6927523494692338	0.8636773903425655	-6.40197	15.72465221103614	15.672871086651782	15.71122647184968	15.777288341265685	15.652394667961422	15.732842589612282	15.767778852270087	15.795760423642918	15.675495969904462	15.786906181755334	15.772341084334782	15.882288539547687
Con_Pmod_vs_Con_Scr	C9JRP1|242	C9JRP1	SLC4A7	S	242	ADIGKKHSDPHLLER	-0.116329	15.966887031825783	-2.50133	0.030239199176894375	0.19034689038388447	-3.87703	15.936417557327164	15.871724781512572	15.964721548159432	15.791708810559898	15.857568782970686	15.774600304278064	16.068453447723144	15.898170204755576	15.958652897343182	16.12176152424207	16.214164973802276	16.144699549235334
Con_Pmod_vs_Con_Scr	C9JRP1|258	C9JRP1	SLC4A7	S	258	GILASPQSAPGNLDN	0.00936851	22.739974776193538	0.1388213114910208	0.8922030935383823	0.9559673351828306	-6.47921	22.94466568998273	22.83109061611408	22.89821989049054	23.028777560757145	22.731118458910604	22.94218570546715	22.62644641853034	22.4806	22.56231807402591	22.592947198500347	22.645090634403875	22.596264622814022
Con_Pmod_vs_Con_Scr	C9JUL9|11	C9JUL9	SRRT	S	11	SDRAMGDSDDEYDRR	-0.00519099	13.249392851763744	-0.1443	0.8879800092978036	0.9545690425574933	-6.47838	13.248426447942249	13.154466219033347	13.202908355242489	13.18222154548696	13.20779478184718	13.200211714138074	13.272525183153716	13.343756369852322	13.359233556586393	13.330426366852794	13.257486848124032	13.233256832905363
Con_Pmod_vs_Con_Scr	C9JW96:P35232|151:151	C9JW96:P35232	PHB:PHB1	S	151:151	ELVSRQVSDDLTERA:ELVSRQVSDDLTERA	0.10072907874282677	11.805812749213402	4.720832979675133	7.025290733708569e-4	0.029346151166124407	-0.200048	11.584520709089704	11.580841295743246	11.57520146133493	11.692317258707014	11.661467446043307	11.688965997646031	11.954590200498966	11.95988756723246	11.971816446966695	12.007008388729489	11.99983730018442	11.993298918384564
Con_Pmod_vs_Con_Scr	C9K0R9|6	C9K0R9	IMPDH1	T	6	__MEGPLTPPPLQGG	0.00164209	12.665190184019378	0.018786337106418836	0.9853617783614632	0.9944872946937208	-6.48932	12.86774021465936	12.44882321407746	12.77123608632145	12.767147767783957	12.637548742478042	12.68802926498688	12.703681725902827	12.64033895469948	12.571572758128555	12.652334745901989	12.604095494651856	12.629733238640688
Con_Pmod_vs_Con_Scr	D6R8Z7|42	D6R8Z7	TSC22D3	S	42	GENNNPGSPTVSNFR	0.00676671	14.743396734449501	0.0983866	0.9234678489272388	0.9702972023163908	-6.48433	15.0225	14.78073412587366	14.934688572013204	15.03302204374304	14.771737712775344	14.953457994081749	14.633216048784396	14.618040980609347	14.579361730050175	14.550441984073196	14.50350247279684	14.540062224296548
Con_Pmod_vs_Con_Scr	D6R9V8|5	D6R9V8	CDV3	S	5	___MQISSEKEEDDN	0.12376236098883453	17.601898380831933	1.5531151243548902	0.14982991500027484	0.42558	-5.33017	17.699858811734124	17.70655943403583	17.67707693610551	17.90222612793876	17.69900365035651	17.853552486546693	17.450915514956115	17.63740535045432	17.368232656766633	17.382265307746113	17.296100895435043	17.549583397907544
Con_Pmod_vs_Con_Scr	D6RCT6|6;8	D6RCT6	MND1	S;T	6;8	__MMEIFSETKDVFQ;MMEIFSETKDVFQLK	0.0849989	16.10877643402771	0.8168935444521984	0.4320316597688816	0.6992174974189844	-6.14359	15.841843291098044	16.20873782938943	15.95007439964863	16.01412606661541	16.161541421926636	16.07998484297291	16.237021251847384	16.03820781905257	16.354544605962673	16.10544038483058	16.279928077734247	16.03386721725402
Con_Pmod_vs_Con_Scr	D6RER6|159	D6RER6	CPOX	T	159	MELLILETQAQVCQA	0.0751503	15.246534274591331	1.7369923510981398	0.11142001418143355	0.36869997172096336	-5.07415	15.283420956005338	15.235941435180964	15.234396752896004	15.395167229775968	15.219635162931809	15.364407606812868	15.202452020217995	15.270993723581544	15.23491491222657	15.19405552870822	15.137813252021166	15.185212714737531
Con_Pmod_vs_Con_Scr	D6RH07|31	D6RH07	PDPN	T	31	TLRKWMETHRQQLRK	0.6686873053190912	8.507190310782109	4.548818601848646	9.22572210753835e-4	0.0330049	-0.468809	8.216602075278963	8.019593175987346	8.06585	8.652453823705883	8.87488	8.780766441358292	8.534587467013539	9.1579	8.914533561779166	8.517511544922126	8.09037	8.261232857877804
Con_Pmod_vs_Con_Scr	D6RIF6|289	D6RIF6	SLAIN2	S	289	SSTKRVPSPGKFRSP	0.0398091	15.223568625329674	1.1822795800305577	0.26303087979482764	0.5541911593442498	-5.78829	15.238298904943958	15.25813910283563	15.273267219255894	15.303706052948405	15.303543649385434	15.281882904398614	15.167191024367956	15.084997280260696	15.057652522680764	15.186903511652629	15.252217232752422	15.275024098473692
Con_Pmod_vs_Con_Scr	E5RJP2|6	E5RJP2	SORBS3	S	6	__MADGGSPFLGRRD	0.0469233	16.064469301406213	1.172533226469486	0.2667538449484572	0.5574346865513278	-5.79911	16.068297874270144	16.00363219453983	16.053150992977542	16.108486583277696	16.068973635086994	16.08839066955483	16.090995943750034	16.165926291743148	16.028931103036616	16.024379880886745	15.9794	16.09302396912608
Con_Pmod_vs_Con_Scr	E7EQL5|73	E7EQL5	DYNC1I2	S	73	SMGLTPESPIVPPPM	-0.00632761	14.620099744381918	-0.120113	0.9066480509640957	0.9639504443143496	-6.4818	14.579190915062211	14.47521482674752	14.554305911282228	14.623244245737466	14.416404529956733	14.550080049136858	14.745298594846853	14.630356416099405	14.639768732549491	14.710079730575403	14.75740422673359	14.759848753855248
Con_Pmod_vs_Con_Scr	E7EQL5|81	E7EQL5	DYNC1I2	S	81	PIVPPPMSPSSKSVS	0.0183898	19.236182646121073	0.5912175062213381	0.5668136399183492	0.7914009327890049	-6.30562	19.232627701208937	19.2568	19.23047128571992	19.24899387792443	19.265283373387167	19.260839828533168	19.199591784393135	19.29860610741668	19.21500763321348	19.216171147360992	19.16848426043259	19.24126609618897
Con_Pmod_vs_Con_Scr	E7ESL9|216	E7ESL9	AGAP3	T	216	ARPPRARTRSDGDAG	-0.0934742	13.113912285002662	-1.24155	0.24127095168869994	0.5331062206713826	-5.72103	13.096913660172088	13.268409585738024	13.151743901564192	13.02803996734043	13.144359858627393	13.06424468203089	13.18409527141891	13.39154490996212	13.142405689742462	12.93065728876621	12.8736	13.09095450957032
Con_Pmod_vs_Con_Scr	E7EW31|260	E7EW31	PROB1	S	260	TALARKLSPEAPAPS	0.0617188	11.958684164633848	1.4943073619044924	0.16436183472918323	0.44486616250131156	-5.40837	11.667834051541496	11.550419407371333	11.659606656611595	11.706328377007791	11.683799570921725	11.672888641546878	12.197373197057455	12.18106656919052	12.080686716819107	12.344281109729405	12.343427811163952	12.41649786664491
Con_Pmod_vs_Con_Scr	E7EW31|776	E7EW31	PROB1	T	776	VPDGDGRTSPLGGAR	0.12792118558530774	9.084479539101702	3.2898931817980195	0.00759288	0.0912805	-2.54393	8.661481158138585	8.732738857257003	8.653123396334042	8.828805047791796	8.768377353719686	8.833924566974062	9.234491084709209	9.35668	9.279873858482318	9.564262924407624	9.509056714512248	9.590938280670088
Con_Pmod_vs_Con_Scr	E7EWR4|302	E7EWR4	CSTF2	S	302	GQGTLQHSPVGPAGP	-0.0358467	12.69475597278803	-0.559931	0.5872064758704976	0.8038122126165923	-6.32428	12.80069584011043	12.618935581566262	12.758890820895065	12.774984470078014	12.595773204963391	12.700224507042408	12.730817470227764	12.73477285191652	12.58270425145278	12.653805681996054	12.62864990071303	12.756817092494652
Con_Pmod_vs_Con_Scr	E7EX44|196	E7EX44	CALD1	S	196	EEKPKRGSIGENQGE	-0.0205527	19.788162560278785	-0.255011	0.8036126412941723	0.9168243593474334	-6.45483	20.00491429693986	20.13956177774911	20.06959572284277	19.908798490016448	20.241627206248488	20.00198788067736	19.284199639000835	19.219611612392303	19.387196508650067	19.75121884274131	19.807563515307596	19.641675230779295
Con_Pmod_vs_Con_Scr	E9PAM4:Q9BTU6|401:431	E9PAM4:Q9BTU6	NA:PI4K2A	T	401:431	RGQILNLTQALKDNK:RGQILNLTQALKDNK	0.17834887437542335	18.56572798866785	3.2430633124190407	0.00823754	0.0958867	-2.62352	18.603983449541523	18.400079810473553	18.561975213677155	18.76502783616358	18.63496711961524	18.701090141039675	18.50122830139019	18.45438990032821	18.37626520020788	18.58204554558717	18.57527172142957	18.63241162456046
Con_Pmod_vs_Con_Scr	E9PAM4:Q9BTU6|430:460	E9PAM4:Q9BTU6	NA:PI4K2A	S	430:460	TARSHQRSSSESYTQ:TARSHQRSSSESYTQ	-0.0189153	17.132249167493743	-0.47414	0.6450514369298361	0.8391545436940525	-6.37054	17.196472691466763	17.155420301883368	17.190315232146034	17.094953254880163	17.252485229339335	17.13802388685127	17.15138459378459	17.211112007865196	17.209140012951263	17.03355737555199	16.987009620707614	16.96711580249734
Con_Pmod_vs_Con_Scr	E9PAM4:Q9BTU6|432:462	E9PAM4:Q9BTU6	NA:PI4K2A	S	432:462	RSHQRSSSESYTQSF:RSHQRSSSESYTQSF	0.019391681742540356	16.981237580959068	0.6699536309744342	0.5172684105207307	0.762132	-6.25447	16.975537085320266	17.033995275640134	16.99380238626715	16.995552421272606	17.05203625792903	17.01392111325353	17.003147719002897	17.06262686313978	17.005786207511232	16.87400667963953	16.85799264921409	16.906446313318586
Con_Pmod_vs_Con_Scr	E9PAM4:Q9BTU6|435:465	E9PAM4:Q9BTU6	NA:PI4K2A	Y	435:465	QRSSSESYTQSFQSR:QRSSSESYTQSFQSR	-0.076283	18.237493940217387	-1.69224	0.1198541853619349	0.3838125295433141	-5.13797	18.241085665340787	18.38237149436296	18.290839033887007	18.15857690049644	18.318119667270725	18.208750603832076	18.22792517333472	18.22904233771108	18.273881288930067	18.167252051865255	18.19647795376016	18.15560511181738
Con_Pmod_vs_Con_Scr	E9PAM4:Q9BTU6|436:466	E9PAM4:Q9BTU6	NA:PI4K2A	T	436:466	RSSSESYTQSFQSRK:RSSSESYTQSFQSRK	-0.0357038	16.765347407278195	-1.03101	0.32556849181882175	0.6127242585746943	-5.94829	16.82148087536217	16.736479303039864	16.80294838681851	16.776665145510847	16.72613257028087	16.750999347858148	16.837380537346306	16.867617904623327	16.77465202181171	16.689482379597397	16.662710420082508	16.737619995006696
Con_Pmod_vs_Con_Scr	E9PCH4:Q8TEU7|1144:1094	E9PCH4:Q8TEU7	NA:RAPGEF6	S	1144:1094	KKRARRSSLLNAKKL:KKRARRSSLLNAKKL	-0.0660532	18.93535333481415	-1.56162	0.14782355222812782	0.4234546941231357	-5.3187	19.020839146832703	19.093705188147997	19.04237874797912	18.92293384039367	19.064373289735254	18.971456384249045	18.811213502645387	18.806614489746607	18.894155475066924	18.886528541522395	18.895920986766768	18.814120424683914
Con_Pmod_vs_Con_Scr	E9PCH4:Q8TEU7|1207:1157	E9PCH4:Q8TEU7	NA:RAPGEF6	S	1207:1157	SAKSSEMSPVPMRSA:SAKSSEMSPVPMRSA	0.0514708	15.5928	0.9911763553846904	0.34376645661461314	0.6270163365086214	-5.98749	15.650231155561215	15.486486122030694	15.618390894154349	15.70990504726057	15.556708306223312	15.642907254602504	15.622777127822452	15.50628734056056	15.510336076544853	15.580955255694567	15.617233837885808	15.611297883785513
Con_Pmod_vs_Con_Scr	E9PCH4:Q8TEU7|1640:1590	E9PCH4:Q8TEU7	NA:RAPGEF6	S	1640:1590	GDVTDADSEADENEQ:GDVTDADSEADENEQ	0.16061583318300343	13.762081438060477	2.694640057494408	0.021542936117583344	0.1584222259880651	-3.55398	13.81922767327605	13.629623202492638	13.806487101672714	13.836196883805847	14.041351815627271	13.859636777557284	13.603141892821574	13.581529228111664	13.566121074252305	13.826776532323809	13.80368611447976	13.771198960304812
Con_Pmod_vs_Con_Scr	E9PCH4:Q8TEU7|280:230	E9PCH4:Q8TEU7	NA:RAPGEF6	S	280:230	LPEGPVDSEDDEEED:LPEGPVDSEDDEEED	0.0438966	14.357998276507976	1.1626042383398825	0.2705891852336899	0.5616597941135566	-5.81006	14.453825171069392	14.402010986148188	14.441729106377084	14.521950399488103	14.422489802689991	14.484814827268282	14.262058125250864	14.279859702590434	14.183541638160218	14.25962879542504	14.248659139494093	14.335411624134013
Con_Pmod_vs_Con_Scr	E9PCW1|49	E9PCW1	GOSR1	S	49	TRDGRRDSSDTTPLL	-0.0185361	19.15828985818265	-0.748814	0.47031927993101874	0.7272126619526118	-6.19741	19.157065517527315	19.16350759586959	19.155000371410548	19.113547750517075	19.171470464250884	19.13494706048808	19.223767338020743	19.264254240372004	19.264320286447308	19.102096335679725	19.077335867167843	19.07216547044068
Con_Pmod_vs_Con_Scr	E9PDE6|73	E9PDE6	ZNF765	Y	73	RQVEQQKYHEDKRSG	0.0133866	17.89774958740536	0.45737319246718977	0.6566682330669079	0.846486	-6.37872	17.968910577648273	17.88486663957114	17.935102052528837	17.95893018970993	17.920426818245282	17.949682036285306	17.832446609657826	17.88500653071953	17.84213802877726	17.887490907827917	17.837755933907584	17.870238723985434
Con_Pmod_vs_Con_Scr	E9PGZ1|196	E9PGZ1	CALD1	S	196	EEKPKRGSIGENQIK	-0.104601	24.2134	-1.44032	0.17875814799743978	0.46176273063917905	-5.47844	24.347	24.53473883541868	24.407757621975502	24.20055059178459	24.481349066639456	24.293836100883812	23.863566375805036	23.869179259784836	23.9927	24.210419294508156	24.237519821426755	24.121992758137168
Con_Pmod_vs_Con_Scr	E9PJA7|337	E9PJA7	BCLAF1	S	337	KTGKFLKSPPLHKNL	-0.0138912	15.474419609939531	-0.392063	0.7028074769671492	0.8691267281212638	-6.40788	15.595241002724828	15.59045817618608	15.622874625667984	15.53376798137503	15.676827344261604	15.556304985138595	15.326308611740236	15.291550649769954	15.295699013486429	15.391771405267038	15.417003981737928	15.395227541918668
Con_Pmod_vs_Con_Scr	E9PL12|162	E9PL12	EEF1D	S	162	DDIDLFGSDNEEED_	0.030443224591873985	16.175034516823366	1.1813	0.26340428954889383	0.5545010169714927	-5.78938	16.16781514820686	16.131761974724505	16.159456306046707	16.201077093400407	16.163892771424056	16.18539323792923	16.19119952928908	16.21002831356822	16.15462886303347	16.171491764012746	16.15829738043098	16.205371819814147
Con_Pmod_vs_Con_Scr	E9PM92:O00193|17:17	E9PM92:O00193	C11orf58:SMAP	S	17:17:00	HGVKRSASPDDDLGS:HGVKRSASPDDDLGS	0.0715401	17.67834252624879	1.3907985946495742	0.19289556405192357	0.48005683361338447	-5.54121	17.58446649446096	17.46350904110854	17.57585268799658	17.645855635688942	17.588419482277068	17.604173293428957	17.77184005123386	17.57999340153935	17.69277782145964	17.857916669397927	17.94016939355198	17.83513634284167
Con_Pmod_vs_Con_Scr	E9PMS6|251	E9PMS6	LMO7	S	251	KHEDNRRSWASPVYT	0.0401968	17.92132562657865	0.5431605117329397	0.5982964799851699	0.8101675765084368	-6.3339	17.92259567588222	18.03612356335064	17.900394492230063	17.91278607250811	18.06127108942281	18.005646875792984	17.718068847754108	17.994832430726902	17.96031973643438	17.939600205182693	17.786874503399865	17.817394026259045
Con_Pmod_vs_Con_Scr	E9PMS6|700	E9PMS6	LMO7	S	700	DWGKDQPSLPFIRHK	0.0569343	16.27060786500158	0.9748994307553659	0.35141261935372814	0.6341280349240207	-6.00315	16.10336215339412	16.200787827779436	16.129546988924464	16.20218644710891	16.19862076144027	16.203692605177572	16.366277568009885	16.51767698131082	16.30894266377645	16.306500103587464	16.260602656667007	16.44909762284258
Con_Pmod_vs_Con_Scr	E9PMS6|721	E9PMS6	LMO7	S	721	MATKIIGSPETKWID	-0.0518122	13.88720834884798	-1.01328	0.3335793931344584	0.6190423153908127	-5.9659	13.693120306376777	13.862001440180416	13.749475016724778	13.647635399420148	13.804241954801736	13.697282751737646	13.975165086194163	14.066931770104269	13.99038409597932	14.035619390232473	14.029435616641209	14.09520735778281
Con_Pmod_vs_Con_Scr	E9PMV1|48	E9PMV1	PLEC	S	48	RSGGGAGSNGSVLDP	0.050926451697883124	16.400323340419522	1.1579548162207303	0.27239999168917717	0.5632413630262917	-5.81516	16.4767	16.312898680401904	16.446151485285544	16.473452591708174	16.465797586511314	16.44923599315751	16.363006409040796	16.393	16.28575003880324	16.382921976515924	16.340917033920004	16.414108048088863
Con_Pmod_vs_Con_Scr	E9PPR1|162	E9PPR1	EEF1D	S	162	DDIDLFGSDNEE___	-0.0150357	16.09019392058389	-0.392622	0.7024068358370568	0.8688754786851419	-6.40765	16.0689	16.13837354617383	16.070938688770237	16.115119668375865	16.017765331742705	16.10023794157759	16.098120791212743	16.168980652635305	16.087258930435446	16.05636525429644	16.03571108556259	16.124537449990225
Con_Pmod_vs_Con_Scr	E9PQ42:P0DTL6|231:324	E9PQ42:P0DTL6	TMEM276-ZFTRAF1:ZFTRAF1	T	231:324	PNLSCKRTLSFQLLL:PNLSCKRTLSFQLLL	0.1818208193312465	16.024484384598978	2.1441166051800677	0.0562163	0.2641705944610854	-4.45723	15.99818661768349	15.728513558543062	16.01025866333494	16.096089072402545	16.153654842427226	16.032677382725453	16.080840667715364	15.858657597061615	15.804444912910135	16.110561250861334	16.208236429983074	16.211691619539483
Con_Pmod_vs_Con_Scr	E9PR49|6;7	E9PR49	TPH1	Y;S	6;7	__MVLENYSKFIMIE;_MVLENYSKFIMIED	0.010922904271236433	16.615694461754142	0.3486049441133935	0.7342362519422281	0.882665	-6.42488	16.587419757970295	16.64487834345501	16.619755713681737	16.61597164431118	16.652100366520063	16.6168	16.600066039789418	16.612479551531088	16.539347154317905	16.600104800511907	16.618179519942768	16.681280131928823
Con_Pmod_vs_Con_Scr	E9PRL9|3;5	E9PRL9	CHI3L2	Y;T	3;5	_____MLYQTINSLK;___MLYQTINSLKTK	-0.0129496	14.29638858841996	-0.430269	0.6756487495329101	0.8561546984577529	-6.39135	14.304544753776923	14.241654094456957	14.297209294358009	14.288765031022187	14.249601702139568	14.266192478219072	14.402426337088762	14.31584024344974	14.36398412334767	14.266766999986023	14.302059117315622	14.257618885878989
Con_Pmod_vs_Con_Scr	F5GYX2|76	F5GYX2	ANKRD12	S	76	SRNEERDSDTEKEGP	0.0274773	12.94222721240765	0.9841729501408264	0.3470413011033141	0.6292507107917233	-5.99425	12.95814152688653	12.944106086170596	12.953517569152806	12.947254896527117	13.020382746053242	12.970559305670678	12.895488862437418	12.903750185781035	12.943778116064047	12.946906452134897	12.933047988844828	12.889792813168604
Con_Pmod_vs_Con_Scr	F5GZI3|566	F5GZI3	PARD3	S	566	VKTRKSKSMDLVADE	-0.0507809	14.804431410529961	-0.914838	0.3806912008516239	0.6585144609148782	-6.05902	14.610275529101424	14.654818639715153	14.623382261497886	14.60206966695781	14.544847901356844	14.58921607394895	14.939123165254578	14.755249407921731	14.962223172942227	15.11193866829068	15.212681487337168	15.047350952035089
Con_Pmod_vs_Con_Scr	F5H4B4|91;93	F5H4B4	FAM227A	T;S	91;93	KKALREKTRSSPEDK;ALREKTRSSPEDKVK	-0.0559634	17.281785664398498	-1.08774	0.3009100620131905	0.5904461187829807	-5.89031	17.273702745678165	17.308344996070165	17.31147537667203	17.302217014441013	17.178954017511614	17.244462029874448	17.35034562356048	17.176017552757717	17.199755734469832	17.26704622984602	17.38750235370767	17.38160429819282
Con_Pmod_vs_Con_Scr	F5H5G4|187	F5H5G4	WBP11	T	187	VIMVRETTMKKRSQV	0.13462537595449042	13.459081431253022	2.50234	0.030186	0.1902842242027821	-3.87537	13.523041294389849	13.356656305468205	13.455139652757444	13.541121569714951	13.62346788368188	13.574123927082145	13.386758196629664	13.523967057691603	13.50081607493008	13.42797165047745	13.300427820686322	13.295485741526672
Con_Pmod_vs_Con_Scr	F5H7W8:Q96C57|169:138	F5H7W8:Q96C57	C12orf43:CUSTOS	S	169:138	GGREKEESPQPRRKR:GGREKEESPQPRRKR	0.00275544	14.514680071261896	0.0677251	0.9472696898123694	0.9793197776298237	-6.48706	14.54431588230402	14.476899563165752	14.508354436124948	14.51391628993616	14.505071882329906	14.518848019719146	14.580082126400397	14.723258414539886	14.607316476356626	14.431347204641664	14.336429740617003	14.430320819007244
Con_Pmod_vs_Con_Scr	F5H7W8:Q96C57|210:179	F5H7W8:Q96C57	C12orf43:CUSTOS	S	210:179	LQESAIHSPGTVEKE:LQESAIHSPGTVEKE	-0.0162013	15.846901619792988	-0.588198	0.5687650229974381	0.7927038648047919	-6.30746	15.804203321375926	15.863755923190514	15.83552718929699	15.805935298504105	15.840775437691333	15.808171705809146	15.833998906673736	15.825857223314859	15.78714145643055	15.889768649219135	15.916682930790811	15.951001395218746
Con_Pmod_vs_Con_Scr	F8VP42|12;18	F8VP42	ZNF433	S;S	12;18	NCRENHASMPGKVSG;ASMPGKVSGSLEVMK	-0.112693	17.19034648601238	-1.58615	0.1421679874748342	0.41518084837783437	-5.28541	17.063956062838987	17.273182422910768	17.181540346508186	17.046848370069394	17.10276787400073	17.030984775058496	17.30315806306627	17.08418855690199	17.128480940356585	17.23631014339773	17.4296	17.403138611341127
Con_Pmod_vs_Con_Scr	F8VQD4:Q8TAD7|28:28	F8VQD4:Q8TAD7	C12orf75:OCC1	S	1 day, 4:28:00	AKDVTEESVTEDDKR:AKDVTEESVTEDDKR	-0.0521444	20.067389191486228	-1.19118	0.2596675702679712	0.550709	-5.77835	20.446789731769215	20.297788967212075	20.431349376579416	20.3244	20.38197240621267	20.31312030821266	19.63068910684886	19.649486612474067	19.54740616281149	19.92784815709375	19.897659156920195	19.96015818052592
Con_Pmod_vs_Con_Scr	F8VQD4:Q8TAD7|30:30	F8VQD4:Q8TAD7	C12orf75:OCC1	T	1 day, 6:30:00	DVTEESVTEDDKRRN:DVTEESVTEDDKRRN	-0.024674	19.748799967486374	-0.330247	0.747672	0.8882427049850244	-6.43147	20.130738095375996	20.132707063146643	20.131823645196796	20.01446401232947	20.2235	20.08324389145312	19.178786820095866	19.102539529200364	19.33814081239769	19.611603611628222	19.630247115197523	19.407766219178804
Con_Pmod_vs_Con_Scr	F8VQQ4:P68363:Q9BQE3:P68366|126:161:161:161	F8VQQ4:P68363:Q9BQE3:P68366	TUBA1A:TUBA1B:TUBA1C:TUBA4A	Y	126:161:161:161	MERLSVDYGKKSKLE:MERLSVDYGKKSKLE:MERLSVDYGKKSKLE:MERLSVDYGKKSKLE	-0.150855	13.39260746414673	-1.53706	0.15368156370527433	0.4306999237600045	-5.3517	13.351571856539335	13.412703440859506	13.392338375294454	13.098576855424204	13.417276891258563	13.18819370554317	13.50022287967742	13.343576768486228	13.647157271520012	13.496459049024716	13.575440450648486	13.287772025484664
Con_Pmod_vs_Con_Scr	F8VQQ4:P68363:Q9BQE3|13:48:48	F8VQQ4:P68363:Q9BQE3	TUBA1A:TUBA1B:TUBA1C	S	13:48:48	TIGGGDDSFNTFFSE:TIGGGDDSFNTFFSE:TIGGGDDSFNTFFSE	-0.0766387	11.240781664405763	-1.40033	0.19010313378762278	0.4759815988487168	-5.52924	10.990817286796904	11.178124455340814	11.04541057465327	11.0463	10.922984077715164	11.015153625452571	11.585774555108776	11.540859906846263	11.500683122231631	11.279396117486094	11.358388281017632	11.425489467867225
Con_Pmod_vs_Con_Scr	F8VQQ4:P68363:Q9BQE3|19:54:54	F8VQQ4:P68363:Q9BQE3	TUBA1A:TUBA1B:TUBA1C	S	19:54:54	DSFNTFFSETGAGKH:DSFNTFFSETGAGKH:DSFNTFFSETGAGKH	-0.0417433	12.262001656480923	-1.09829	0.29648538639044847	0.5860689686223567	-5.87925	12.130732934410338	12.079984416965871	12.145132159557528	12.10576930869449	12.058905213410362	12.065945122516814	12.471174486892124	12.38924635859098	12.339593079005793	12.405487846219383	12.456390789235192	12.495658162272187
Con_Pmod_vs_Con_Scr	F8VZX2|189	F8VZX2	PCBP2	S	189	YRPKPSSSPVIFAGG	0.1332695758197051	14.051614276958649	4.122557362008367	0.00184413	0.046366802146534415	-1.15239	14.030775960037722	14.00311105831466	14.024362625288376	14.161839945166252	14.141601597729249	14.15461682820438	14.006879876283238	13.920470796352229	14.020201784328904	14.056752555762577	14.09227209599134	14.00648620004486
Con_Pmod_vs_Con_Scr	F8W6L3|498	F8W6L3	KLC1	S	498	MRSRKQRSISEIPKK	-0.283449	20.060312051690367	-2.96358	0.013430845110942384	0.12373697943532849	-3.0989	20.01324291089716	20.411351333896917	20.117874396486616	19.769812923224936	20.04038156313631	19.88192611076601	20.086652717962387	20.142309006770077	20.248375536415928	19.998748088897152	20.044428483585676	19.96864154824526
Con_Pmod_vs_Con_Scr	F8W7T1|403	F8W7T1	DPF3	S	403	GRRSGRGSPTADKKG	-0.0235625	10.333144994956399	-0.270813	0.7917545683007093	0.9120507036970464	-6.45041	10.122272999632962	10.157994979448542	10.193948216433691	10.098645972587754	10.211782983001005	10.093099656976651	10.61974808503521	10.264583688338968	10.52889142619571	10.50837117634041	10.71846080485837	10.47993995062751
Con_Pmod_vs_Con_Scr	F8W910|94	F8W910	RBM5	S	94	DGVLRRPSACGCEAD	-0.198552	16.71058905660339	-1.58626	0.14214374228648602	0.41518084837783437	-5.28527	16.732570341351753	16.83567917340912	16.744469414684776	16.39142538967015	16.786742797876673	16.538895928109298	16.50009541039492	16.479517372592394	16.835166741861254	17.011953566659678	17.00128832678954	16.669264215841128
Con_Pmod_vs_Con_Scr	F8WEM9:Q8N720|12:12	F8WEM9:Q8N720	NA:ZNF655	S	12:12:00	PAQEAAGSPRVQFQS:PAQEAAGSPRVQFQS	0.026587017792842005	11.956824927159506	0.2598763428990448	0.7999557692553425	0.9151860074684105	-6.4535	11.984475709923265	11.71858923340669	11.918731921691151	12.028288316828208	11.755410297730432	11.9179	12.141380878159277	12.214806925369931	11.915102075847908	11.924505825861582	11.853993094160003	12.10875554309463
Con_Pmod_vs_Con_Scr	G1UD79|64	G1UD79	PABIR2	S	64	HSLLLSSSPNRIPSS	0.025389092126481216	14.865757573307961	0.30990010802439794	0.7626661973571106	0.8967239152935248	-6.43837	14.787825402650954	14.94947421681915	14.912492073290135	14.77679465687229	15.117740841523563	14.831423470743824	14.877893097160314	14.75914556293852	14.758590378257736	14.796000306960888	14.923569981828992	14.898140890649175
Con_Pmod_vs_Con_Scr	G3V2Y8|16	G3V2Y8	CBLN3	T	16	FGRTLTPTLKMRSTW	0.042202041149032254	16.635328473693498	0.621752	0.5472925595933248	0.7807804749097222	-6.28648	16.457915256447215	16.6395	16.482489105602884	16.536722660180963	16.584976160210505	16.584803082560324	16.75486450901825	16.689609318255464	16.920860782855353	16.683531881336158	16.734414171011775	16.554263339388495
Con_Pmod_vs_Con_Scr	G3V3B0|67	G3V3B0	ACIN1	S	67	KSFKRKISVVSTKGV	-0.300287	19.735143208227893	-3.1705	0.00934876	0.10207086180480285	-2.74694	19.88831974495377	20.253851336282608	19.933474006590664	19.63753462805402	19.789366010917064	19.747884247952925	19.762587927211644	19.99510855679593	20.02214563392903	19.310516204506932	19.237956192716823	19.24297400882329
Con_Pmod_vs_Con_Scr	G3V3H3|546	G3V3H3	KLC1	S	546	GEEDGTGSLKRSGSF	-0.0339363	16.799199843059533	-0.708887	0.49374667421356166	0.7468195765525499	-6.22702	16.90280489102895	17.02437477882091	16.89378559546922	16.894832540392212	16.89043110451702	16.93389259373403	16.63279392284419	16.707740095429074	16.797023207782466	16.681794522582983	16.64481291690999	16.586111947203342
Con_Pmod_vs_Con_Scr	G3V3H3|552	G3V3H3	KLC1	S	552	GSLKRSGSFSKLRAS	-0.0836534	22.192213217971123	-1.93075	0.0807867	0.3133658075012936	-4.788	22.184282614282026	22.282066275254383	22.237015796546963	22.116564558273772	22.204436718215906	22.131403168962606	22.174685788820497	22.0503	22.151087700189425	22.22474736239369	22.318386388921216	22.231549708925566
Con_Pmod_vs_Con_Scr	G3V3T3|128	G3V3T3	ACIN1	S	128	HADDSRISEDETERN	0.0505012	13.616994759068078	1.9400957362995872	0.0795269	0.311777	-4.77383	13.663584981157184	13.635277014359673	13.638430229026971	13.716726801334326	13.661367722471802	13.710701154743267	13.474718662626785	13.52542615944298	13.503266202697722	13.64306829932866	13.60407327339102	13.627296608236556
Con_Pmod_vs_Con_Scr	G3V4C1|239;246	G3V4C1	HNRNPC	S;S	239;246	ETNVKMESEGGADDS;SEGGADDSAEEGDLL	0.029372612933549647	17.548108044997075	0.743485	0.47340489726219903	0.7298463727938598	-6.20145	17.536141740961437	17.52034210954445	17.56165476349738	17.570143547867637	17.583950191797303	17.552162713138976	17.469437417791337	17.312635389288868	17.395326104947003	17.65723138155984	17.747213940216202	17.67105723935446
Con_Pmod_vs_Con_Scr	G3V4C1|246	G3V4C1	HNRNPC	S	246	SEGGADDSAEEGDLL	-0.0331463	23.034789435412915	-0.479557	0.6413192961032786	0.8374210074883343	-6.36783	23.020983570573645	23.036048887566793	23.07569322610831	22.97614291726493	23.08228120455097	22.974862767114775	22.900003442841584	22.627327452194574	22.82874225787981	23.254258642065423	23.413307255833796	23.22782160096036
Con_Pmod_vs_Con_Scr	G3V4C1|285	G3V4C1	HNRNPC	S	285	EGEDDRDSANGEDDS	0.0480208	19.638485265542467	2.024648080857301	0.0689365	0.29204215184839016	-4.64423	19.6182	19.5969	19.618887796347405	19.678055340218112	19.640243894612652	19.659764368293008	19.644741331061855	19.618944581405955	19.59978557819742	19.646401725687873	19.661216161154712	19.678669046418833
Con_Pmod_vs_Con_Scr	G3V4C1|292	G3V4C1	HNRNPC	S	292	SANGEDDS_______	0.0616315	19.5827	2.8252922069052113	0.0171233	0.14179929794964358	-3.33347	19.555793326849123	19.538795488893463	19.550857553390227	19.621604202635545	19.59624316316121	19.6125	19.57834245498959	19.588032536948017	19.560417842518575	19.59288310922951	19.58617114663224	19.61055631501926
Con_Pmod_vs_Con_Scr	G3V5R9|590	G3V5R9	KLC1	S	590	NPGMKRASSLNVLNV	0.1035849957804551	17.261210089188197	1.6688022096297246	0.1244954776065039	0.39189867000768086	-5.17102	17.358181233924498	17.269873944015877	17.30883360805071	17.34101150080681	17.50022062301122	17.40641164951442	16.980236072813128	17.07702777148073	17.16888903149477	17.341040267863704	17.242556021898405	17.140239345384106
Con_Pmod_vs_Con_Scr	G3V5R9|591	G3V5R9	KLC1	S	591	PGMKRASSLNVLNVG	0.11863797153890587	22.190530273529944	4.082523437084072	0.00197049	0.0477255	-1.21778	22.23168128862527	22.21075581434493	22.22618482500831	22.30241833658433	22.392977699777777	22.32913980623312	21.980954225439923	22.0356	22.019393508817235	22.210124508663988	22.172629672984545	22.17452502766679
Con_Pmod_vs_Con_Scr	G5E948|922	G5E948	MAP4K4	T	922	TLIVRQSTVDQKRAS	0.0528043	19.15694918960029	0.8732307349211306	0.40195712220008417	0.676762	-6.09596	19.38371886543152	19.3755	19.33145314973125	19.526499429214493	19.24519945380564	19.47736180101817	19.06088190846278	19.038546203847268	19.121774349813418	18.791275062937576	18.784323627965172	18.7469
Con_Pmod_vs_Con_Scr	G5E948|987	G5E948	MAP4K4	S	987	LTANETQSASSTLQK	-0.0396698	15.907041671559822	-1.18508	0.26196967084522094	0.5524906010037193	-5.78517	16.02260552798766	16.009926238481643	16.012946658924417	16.01344606950086	15.924679396283052	15.98834355928274	15.80170235282888	15.843621996678714	15.758880654514416	15.822391240548596	15.80262608649175	15.883330277195135
Con_Pmod_vs_Con_Scr	G5E9E7|916	G5E9E7	TJP1	S	916	QPIHRIDSPGFKPAS	0.0687929	12.236112188791582	2.1018495086123794	0.0604383	0.27576430423944476	-4.52387	12.31388755619666	12.329806887823544	12.301647774598775	12.356631368462986	12.409184583058051	12.385904839248935	12.137078580975633	12.25160351010078	12.207126389224465	12.078900963904928	12.013064038307345	12.04850977359688
Con_Pmod_vs_Con_Scr	G9CGD6:Q6P9H4|383:383	G9CGD6:Q6P9H4	CNK3/IPCEF1:CNKSR3	S	383:383	PGPKGSESPNSFLDQ:PGPKGSESPNSFLDQ	-0.0854169	16.175237996375746	-3.70551	0.00371287	0.0633767	-1.84215	16.250911108205695	16.228735260583218	16.24704566983518	16.14801039735303	16.16991149901519	16.152519425932113	16.178208127316708	16.153769595357986	16.191469313773077	16.135944200744433	16.141654910665657	16.104676447726668
Con_Pmod_vs_Con_Scr	H0Y2V6:O00515|375:272	H0Y2V6:O00515	CEP170:LAD1	S	375:272	TKLEKAKSPTADAKV:KALASEKSPTADAKP	-0.0962992	17.266934935885022	-1.17949	0.26409089362206994	0.5548468114283055	-5.79139	17.163311243319246	17.303236537621057	17.256899416836294	17.08109320454914	17.250039091064206	17.10341721503888	17.19574620209937	16.91141244534104	17.143	17.537803300713925	17.73103663909768	17.52618018719224
Con_Pmod_vs_Con_Scr	H0Y2V6|377	H0Y2V6	CEP170	T	377	LEKAKSPTADAKVVS	-0.0496352	15.133435456425879	-0.624489	0.5455610329872982	0.7798795790328326	-6.28473	15.070227710089462	15.073663895925336	15.052323821428146	14.925724520266511	15.1175	15.00410872552806	15.088020545215922	15.061295795218845	15.309164433767252	15.387627660320591	15.37040120301936	15.141190601763263
Con_Pmod_vs_Con_Scr	H0Y3Z8:Q08334|481:261	H0Y3Z8:Q08334	IFNAR2-IL10RB:IL10RB	S	481:261	YAFSPRNSLPQHLKE:YAFSPRNSLPQHLKE	-0.0540696	16.06557307488386	-0.75925	0.4643134025690401	0.7231363949800764	-6.18943	15.9897	16.113643257214722	15.964197699961026	15.967485064476078	15.927238974713632	16.010597929884796	16.126275146855306	16.143608453446515	16.36801667385064	16.128170337920878	16.10802819568521	15.93992539295644
Con_Pmod_vs_Con_Scr	H0Y626:O95361|60:60	H0Y626:O95361	NA:TRIM16	S	60:60	RETEEQDSDSAEQGD:RETEEQDSDSAEQGD	-0.115306	21.886383687382207	-3.20361	0.00882386	0.0994662	-2.69061	22.131550052830057	22.044000885637427	22.092133946867676	21.97923418050191	21.96088638140732	21.9816	21.783282630921295	21.766224985775946	21.852696296726144	21.724106896025013	21.70025735070312	21.620585183040777
Con_Pmod_vs_Con_Scr	H0Y626:O95361|62:62	H0Y626:O95361	NA:TRIM16	S	62:62	TEEQDSDSAEQGDPA:TEEQDSDSAEQGDPA	0.024306182223789108	13.56588998870266	0.4989445194774074	0.6280478629281002	0.8293522156975967	-6.35791	13.56322662255088	13.559186234039696	13.563879864150367	13.672711434227024	13.47714785320126	13.609351979984034	13.618049697006285	13.547984979343806	13.508971234913547	13.506461128530727	13.555178463180017	13.608530373304276
Con_Pmod_vs_Con_Scr	H0Y6Y5|85;86	H0Y6Y5	MTX1	S;T	85;86	SPTFEKRSTMLIMIC;PTFEKRSTMLIMICQ	-0.060515	15.490645472388513	-1.26127	0.23435997164310352	0.5256756764146427	-5.69811	15.453467132171662	15.457867511523718	15.496760777051424	15.362573087196008	15.491357213366443	15.372620057116867	15.48360127858098	15.327689585547942	15.425297648464324	15.642549774318924	15.73695982004541	15.637001783278444
Con_Pmod_vs_Con_Scr	H0Y7W6|349	H0Y7W6	FNBP1	S	349	AVPNGPQSPKQQKEP	0.011511579563885377	15.429594294690974	0.3129646799424549	0.7604010649851967	0.8950681342789902	-6.43736	15.514192032751096	15.47710045772309	15.511873232909592	15.560169573482664	15.458417487131571	15.519113401461198	15.365267494577738	15.345955027751875	15.271172993376693	15.344526120843168	15.35879898105703	15.428544733225973
Con_Pmod_vs_Con_Scr	H0Y858:Q6IBS0|28:167	H0Y858:Q6IBS0	NA:TWF2	S	28:167	NEVKTEISVESKHQT:NEVKTEISVESKHQT	-0.10534	10.858575477267468	-1.31391	0.21670290825759939	0.5069972330734335	-5.63566	10.806909743776934	10.68689621567881	10.80986326809192	10.773784160893529	10.547402811115722	10.666462692299062	11.233741639307851	11.122789923735132	10.963976388786508	10.80400928549497	10.871992366471002	11.015077231558182
Con_Pmod_vs_Con_Scr	H0Y858:Q6IBS0|31:170	H0Y858:Q6IBS0	NA:TWF2	S	31:170	KTEISVESKHQTLQG:KTEISVESKHQTLQG	0.13525700122221807	14.889102535374711	2.431902604205132	0.034141683488530986	0.20457114028534226	-3.99179	14.838396102076688	14.662964031407586	14.7519	14.948824377959866	14.79225559589047	14.917993043256898	14.97951110129584	15.096849243097608	15.022203254353094	14.94003114962884	14.826797337144214	14.891463308429124
Con_Pmod_vs_Con_Scr	H0Y9W8:Q9Y2W1|97:408	H0Y9W8:Q9Y2W1	FAM193B:THRAP3	S	97:408	WKQKGSQSPKCDSQP:KPFRGSQSPKRYKLR	-0.03407	15.545754234229921	-0.563868	0.5846187833688037	0.8017629029057879	-6.32199	15.587346855895474	15.52840003408234	15.58364095165378	15.487639013148325	15.597192090476238	15.512346693662108	15.546006263833297	15.404446038264574	15.61098564625784	15.594496862154225	15.645670862382108	15.450879498948748
Con_Pmod_vs_Con_Scr	H0Y9Y2|3029	H0Y9Y2	BOD1L1	S	3029	RATSKLGSPDTVSPR	-0.00808749	12.743439158718491	-0.177603	0.8623955876573275	0.9430554019614549	-6.47266	12.710752041374384	12.86173973674216	12.733713434792524	12.789652721878678	12.707121810051843	12.7852	12.632311877574525	12.708128038856016	12.632999641404634	12.759958613180016	12.754598463602104	12.8451
Con_Pmod_vs_Con_Scr	H0Y9Y2|3055	H0Y9Y2	BOD1L1	S	3055	TSEKVSNSPPLGRSK	-0.00667723	11.551701486673448	-0.172883	0.8660120845023784	0.9442391724945811	-6.47354	11.444564976608143	11.463758500622934	11.452020053418307	11.508657853911078	11.367964846279609	11.463689134326792	11.752989703510426	11.695239360645674	11.672039782662292	11.557971315388054	11.60249465762523	11.639027655082842
Con_Pmod_vs_Con_Scr	H0YBP7:Q96JY6|18:206	H0YBP7:Q96JY6	NA:PDLIM2	S	0.893056	GPRSSRPSMDSEGGS:GPRSSRPSMDSEGGS	-0.164939	17.87019477110236	-2.0465	0.0664227	0.287657	-4.61035	17.687529775741133	17.94855171862512	17.79155397801989	17.509908457452056	17.825564259595232	17.597346975164236	17.936559581890016	18.029146000488193	17.945959987260462	18.022587876914347	18.042581241996608	18.105047400081016
Con_Pmod_vs_Con_Scr	H0YBP7:Q96JY6|78:266	H0YBP7:Q96JY6	NA:PDLIM2	S	78:266	AFLPSSLSPQSSLPA:AFLPSSLSPQSSLPA	0.024493140763791388	19.13748392565942	0.8810796154912767	0.39788384949131705	0.6727381597650038	-6.0891	19.081018745905595	19.16504281268772	19.11429791064372	19.137496748115115	19.156309337681495	19.140032805731806	19.11821451542748	19.102964391426337	19.08495257983258	19.153464456491815	19.187280836503955	19.208731967465436
Con_Pmod_vs_Con_Scr	H0YC42:P55327|176:176	H0YC42:P55327	NA:TPD52	S	176:176	KNSPTFKSFEEKVEN:KNSPTFKSFEEKVEN	-0.367925	16.00508386452507	-2.00585	0.0711701	0.2962819925126081	-4.67326	16.211678483714913	15.65688569319454	16.158463537996546	15.767778707644286	15.554964741045472	15.600509441937842	15.917194590737727	15.219632399460886	15.586119948935467	16.72927688040295	17.008044399581387	16.65045754964882
Con_Pmod_vs_Con_Scr	H0YE58|2	H0YE58	EEF1D	S	2	______GSDNEEEDK	-0.145585	21.989353047964578	-2.07868	0.0628788	0.2804708865337219	-4.56019	22.127424867184253	22.11844925314423	22.19635210736226	22.01766058438813	22.022382451506218	21.965427884639883	21.939100837435497	21.64378473614108	21.714085823410663	21.939739144669517	22.127708231079097	22.060120654614085
Con_Pmod_vs_Con_Scr	H0YFV2|6	H0YFV2	CREB5	S	6	__LQNEVSMLKNEVA	0.10816209143174049	17.27138272841589	3.3070496801435745	0.00736983	0.0896772	-2.51479	17.107106882017828	17.20847457855027	17.139685478169078	17.2358	17.28849547353266	17.255410782202425	17.246756214288023	17.203666216545077	17.270160424766402	17.421667136164142	17.46550955959543	17.413813037862056
Con_Pmod_vs_Con_Scr	H0YG16|262	H0YG16	KLC1	S	262	DSRALSASHTDLAH_	0.0564709	20.695305682818805	1.2405736805204768	0.24161724983954408	0.5336927205291134	-5.72216	20.697263505319196	20.776335234992764	20.750865515806783	20.735573470161036	20.892282864739833	20.76602055804631	20.514669572766827	20.417620195777097	20.49826528120279	20.74114201029183	20.8166	20.737030907271496
Con_Pmod_vs_Con_Scr	H0YG16|264	H0YG16	KLC1	T	264	RALSASHTDLAH___	0.018160892852019828	20.242909113147032	0.34606032294647177	0.7360931262473294	0.8833112643641586	-6.42581	20.31663262443734	20.366448940074687	20.368639153381444	20.268964952943964	20.51682438014849	20.32041406335707	19.99655394464787	19.967892522878188	19.985413027211447	20.259244081163313	20.293559539189076	20.2543
Con_Pmod_vs_Con_Scr	H0YGG4|7	H0YGG4	EIF2B1	S	7	_XRGRLGSPGAPQQE	0.0311352	15.193211751160364	1.2090011458564451	0.25303457001618357	0.5434520540536322	-5.75827	15.170044790402455	15.097373174000932	15.142450029869094	15.178722906195992	15.15213961590258	15.17241118563384	15.223121447700716	15.226763839815751	15.243098874469371	15.258938274516176	15.235842321327931	15.21763455408952
Con_Pmod_vs_Con_Scr	H0YHG0:P82979|476:163	H0YHG0:P82979	NA:SARNP	S	476:163	RFGLNVSSISRKSED:RFGLNVSSISRKSED	0.5854951232172176	25.646448493687515	4.128890776870815	0.00182494	0.0462364	-1.14206	25.85064549049188	26.08719187863027	25.823483610162235	26.54503321535698	26.397270655741927	26.57550247783713	25.261521940578284	25.813664100102155	25.39113442237594	24.704059098650937	24.44957321012584	24.8583
Con_Pmod_vs_Con_Scr	H0YI62|45;51	H0YI62	AMDHD1	S;S	45;51	CILPVGRSHLHGNSP;RSHLHGNSPGRRRDP	-0.0985547	12.882959496272278	-2.26021	0.046020134787936116	0.23873970239400708	-4.27173	12.96910575198158	12.92961265260419	12.965899073926751	12.88123100790922	12.832244025035164	12.855478269407456	12.91075126214832	12.976158660742728	12.821539968344949	12.793728743246165	12.763961901271022	12.89580263864979
Con_Pmod_vs_Con_Scr	H0YIV5|37	H0YIV5	LETMD1	T	37	WRLTDLCTKKALSRA	-0.0040467	13.795881227595117	-0.14727	0.8856925054711372	0.9539116410100369	-6.47792	13.797862220442738	13.833156341639876	13.800381081841842	13.841808123028809	13.75530634594439	13.822145066078455	13.752549534432896	13.736551453558722	13.734774009054911	13.808575087086789	13.826176561351913	13.841288906680068
Con_Pmod_vs_Con_Scr	H0YKB1|329	H0YKB1	TJP1	S	329	PSDHSRHSPQQPSNG	-0.143584	13.822309435140253	-1.24503	0.24003804211727692	0.5320711205530568	-5.717	13.758425577320809	13.693748700823637	13.744078601729813	13.79101324237732	13.335759883041716	13.638728491586384	14.13932781275616	14.085361500552184	13.85166764984049	13.83040463508199	13.879653550145491	14.119543576427048
Con_Pmod_vs_Con_Scr	H0YLS6|113	H0YLS6	PSMA4	S	113	WKDSNQSSQTKRSGA	0.034461695001743564	13.675181799646431	0.3331120144071562	0.7455690299056532	0.8878223901447562	-6.43046	13.71673773384835	13.969938679628155	13.880391054888502	13.74862097136126	14.114401276100306	13.807430305908657	13.570738221883882	13.327173026577505	13.443904607138812	13.40346139772032	13.619317508696868	13.500066812004548
Con_Pmod_vs_Con_Scr	H0YNJ9|11	H0YNJ9	DUT	S	11	SEETPAISPSKRARP	-0.0904707	7.062964040011492	-1.28442	0.22645375918289679	0.5176308048355743	-5.67087	7.182251403236229	7.280266257488039	7.176173000819798	7.255936026617405	6.927586984219353	7.183755435084127	7.092629167645157	7.048931157041963	7.047364693011309	6.806505492144492	6.852282083852087	6.90189
Con_Pmod_vs_Con_Scr	H3BLW5|77	H3BLW5	L1CAM	S	77	DETFGEYSDNEEKAF	0.17371763383144767	25.249559356154066	2.7640851531491806	0.0190681	0.14847194375526115	-3.43694	26.08250217836728	25.99547954422649	26.104375456501675	26.13142174975031	26.396359537869294	26.175728792970183	23.90979049052405	23.828496022260133	23.898695631735215	24.838102823786755	24.86749177780363	24.766268268053786
Con_Pmod_vs_Con_Scr	H3BN50|20	H3BN50	NHERF2	S	20	APGAPPRSPPQRLDV	-0.0037736	15.791129251020509	-0.109465	0.9148856381364845	0.9662738376861574	-6.4831	15.621098241734272	15.740697493088367	15.663542141390732	15.680506538353162	15.66026932537247	15.673241227009967	15.981058202590225	15.949862237427697	15.92984583277624	15.819024718477785	15.871616106540102	15.902788947485096
Con_Pmod_vs_Con_Scr	H3BN50|8	H3BN50	NHERF2	T	8	MARSGSATPPARAPG	-0.0225414	15.483503982430667	-0.689429	0.5054198709226436	0.755041	-6.24092	15.344628506079902	15.371306410273409	15.344758376138545	15.331436352479823	15.32635794794012	15.335274905775393	15.695776876716236	15.790065392160743	15.691483541652682	15.522287336882986	15.4804	15.56829553262146
Con_Pmod_vs_Con_Scr	H3BPE1|7418	H3BPE1	MACF1	S	7418	TPIRDSHSPDLQLPT	0.0163078	15.594848468727866	0.3344165928236566	0.7446122709786454	0.8872433631448021	-6.43	15.761681468135391	15.548428381723884	15.71810546889682	15.727633843946782	15.665318284038833	15.68418672412107	15.471479503101728	15.426281342089323	15.385254302592276	15.587266194093305	15.572625103128017	15.589921008866972
Con_Pmod_vs_Con_Scr	H3BQB6|123;125	H3BQB6	STMND1	S;S	123;125	IVQGIIQSHSKVFRN;QGIIQSHSKVFRNGE	0.072094	16.65574816374203	1.2743238884449732	0.22987595542928319	0.5213068811267276	-5.6828	16.723158665350606	16.807128577822326	16.797096356807486	16.763404455913605	16.98158398112633	16.79867724608397	16.484554897332842	16.362198460265144	16.42779981495262	16.53407190221801	16.63187202188331	16.557431585148095
Con_Pmod_vs_Con_Scr	H3BT57|403	H3BT57	PML	S	403	AAVSKKASPEAASTP	-0.0435904	23.231995045777246	-0.871359	0.4029329563769558	0.6775433151816327	-6.09758	23.29134405036547	23.233986150152287	23.27414699060835	23.176192052558335	23.282744935618325	23.20976902496899	23.165285159875527	23.111595660880315	23.262014403250223	23.30690320227536	23.307639947740977	23.16231897103279
Con_Pmod_vs_Con_Scr	H3BT57|482	H3BT57	PML	S	482	DGPPSPRSPVIGSEV	-0.00451573	13.687633146471182	-0.0952225	0.9259208507898496	0.9705910324884441	-6.48466	13.753192541721818	13.612421811791217	13.738093038615242	13.662543610681386	13.76175947340754	13.665857103207133	13.610444546640789	13.672118455214422	13.547348609158329	13.751654570916903	13.698861996186334	13.777302000113073
Con_Pmod_vs_Con_Scr	H3BTX0:Q9BTK6|67:237	H3BTX0:Q9BTK6	NA:PAGR1	S	67:237	SEDPSPASPPLRSSG:SEDPSPASPPLRSSG	-0.0519441	16.095672912565245	-1.30763	0.21875	0.5088105983328522	-5.64321	16.06194042409509	16.084139291279662	16.10396166086735	16.045816437072364	16.033153762776735	16.01523886612269	16.221595572787336	16.116207925586526	16.082244252080056	16.063106591828358	16.145608963199415	16.175061203087356
Con_Pmod_vs_Con_Scr	H7BXE3|199	H7BXE3	SLTM	S	199	EENEKEGSLAEADHT	-0.0909588	14.59785935322487	-2.60734	0.0251118	0.17291412888985522	-3.70044	14.6092	14.69905807690056	14.613638583182576	14.530531887430554	14.557892339198236	14.56059494483742	14.389765274977613	14.418511576297284	14.488460073312009	14.791936531442282	14.782853211263031	14.731870773948064
Con_Pmod_vs_Con_Scr	H7BXF5|682	H7BXF5	SAP130	S	682	SMRSTSGSPRPAGAK	0.032380609455703535	10.653107463345238	0.6206872984605499	0.5479665840557226	0.7810669375826766	-6.28717	10.688926772491444	10.646811408643444	10.641353447166027	10.766955233559807	10.57655998682603	10.730718236282184	10.692448533709662	10.807922752572008	10.69846758275903	10.541899048368167	10.466619514948633	10.578607042816412
Con_Pmod_vs_Con_Scr	H7BXR3|9	H7BXR3	SORBS2	S	9	NTGRDSQSPDSAKGF	-0.0879287	16.008517215231066	-1.31731	0.21560063501751306	0.5060327848917447	-5.63157	15.530787732697906	15.63173646901289	15.58557365290784	15.418322502393387	15.60195264577144	15.464036641572916	16.56130537093238	16.400743989949433	16.60670009800913	16.426413211523172	16.530452866685362	16.344181401316952
Con_Pmod_vs_Con_Scr	H7BYS8|57	H7BYS8	CD47	S	57	KGKKRQASNQKTIQP	-0.0524646	14.74718524708916	-0.827125	0.42646072496915954	0.6950068622288634	-6.13514	14.569382605649208	14.735959884671164	14.635748914302614	14.630028536933358	14.552057462038238	14.601611685940313	14.953843755703916	14.729750094970656	14.881075497883389	14.816449025372886	14.982367862968651	14.877947638635526
Con_Pmod_vs_Con_Scr	H7BYY1|216	H7BYY1	TPM1	S	216	SVTKLEKSIDDLEEK	0.00722621	12.27859462599098	0.13181235128766622	0.8976103625051264	0.9592802795796478	-6.48022	12.159258572580178	12.150727610106784	12.204445176299648	12.085127220765305	12.327861575469708	12.123121182126145	12.301505502890087	12.31553970717557	12.230913217288135	12.462528401496929	12.470483067112314	12.511624278580957
Con_Pmod_vs_Con_Scr	H7BZ55|886;888;890	H7BZ55	CROCC2	T;S;T	886;888;890	QLQREKETLSLTLAE;QREKETLSLTLAEEK;EKETLSLTLAEEKEV	0.1357318728000596	7.955517740112554	3.3648123213511103	0.00666696	0.0860207	-2.41674	7.827425782660251	7.891301446490552	7.844005432960015	7.9907	7.987343801001035	7.991885261413663	8.102673078224411	8.200187497137183	8.067801780110484	7.834087052138836	7.80443	7.9243724112032865
Con_Pmod_vs_Con_Scr	H7BZB9|127	H7BZB9	MAP2	S	127	KIPALQGSTKSPRYS	0.41016436741926654	19.057681347192567	3.6008520572364384	0.00443912	0.0687763	-2.01782	19.46078324105038	19.143069573108335	19.328628404069963	19.7845	19.63111237071249	19.74735679628528	18.552549162813925	18.906291300801172	18.549062203793724	18.60753516938255	18.3456	18.635679442584983
Con_Pmod_vs_Con_Scr	H7C0V5|558	H7C0V5	ANKHD1-EIF4EBP3	S	558	ALKGEIPSPQLTRPK	-0.000292423	18.73679704080618	-0.00382327	0.997021	0.9991406190248322	-6.4895	18.931032666078593	18.636519361425773	18.87086477872852	18.91252613370587	18.708677328950845	18.81633607439107	18.7496	18.599366462638947	18.5859	18.65712639543153	18.686989563830117	18.68658439013429
Con_Pmod_vs_Con_Scr	H7C1W4:Q93075|396:453	H7C1W4:Q93075	NA:TATDN2	S	396:453	RSFRFSRSSEEREVK:RSFRFSRSSEEREVK	0.0080507	15.397310680670767	0.15490711551359151	0.8798154122976098	0.9509960237740296	-6.47669	15.459467884308564	15.226712111468856	15.409329587383498	15.4111	15.342373289461078	15.366146093475768	15.559578721845863	15.485681870847229	15.485814405704549	15.351246940393931	15.344631667947253	15.325603297639011
Con_Pmod_vs_Con_Scr	H7C3C4|775	H7C3C4	SLC4A7	S	775	KVTRSNMSPDKPVSV	0.0881093	15.724461150255959	2.567605412108131	0.0269246	0.1791681804104726	-3.76681	15.784634141146638	15.773592288658689	15.792042101370976	15.884189103387714	15.860618668195428	15.86978879826428	15.477784742048808	15.358502357093204	15.456798262860152	15.798227438270604	15.860299936484452	15.777055965290549
Con_Pmod_vs_Con_Scr	H7C4V2|246	H7C4V2	U2SURP	S	246	TPTRKERSPSGSRTP	0.14650997229108853	9.657925314261709	3.5535544742672163	0.0048141	0.0717629	-2.09749	9.575845608189027	9.485072565539202	9.537890918794572	9.74658	9.588864706130352	9.702895915145588	9.75864	9.692282959698822	9.745004205329966	9.69203	9.703362214691849	9.666637729091637
Con_Pmod_vs_Con_Scr	H8Y6P7:P0CAP1|291:291	H8Y6P7:P0CAP1	GCOM1:MYZAP	S	291:291	KMQAAEISLEEKDQR:KMQAAEISLEEKDQR	0.066674	14.612534227528716	2.1580730654675233	0.054884961979632586	0.26093273238018017	-4.43511	14.668269960473555	14.56398325043776	14.628993992436415	14.714657487131603	14.650133155978043	14.69647846612726	14.58391680435146	14.604957415401818	14.58842355342077	14.571966645025949	14.533987907805036	14.54464209175492
Con_Pmod_vs_Con_Scr	H8Y6P7:P0CAP2|667:270	H8Y6P7:P0CAP2	GCOM1:POLR2M	S	667:270	SHCQKSGSPISSEER:SHCQKSGSPISSEER	-0.03526	13.522284036875712	-1.29607	0.22256115790885866	0.5126168704234748	-5.65704	13.463795769460807	13.5391	13.496167728575983	13.461830204740536	13.471307140522434	13.460140033260116	13.590943584922115	13.551497473384485	13.553669909331523	13.528443500860048	13.573160124555676	13.577359021669825
Con_Pmod_vs_Con_Scr	I3L0L0|420	I3L0L0	RUNX2	S	420	RYSVVASSPEAAPRL	0.14341980149743883	14.958123228540916	2.4388177308686467	0.0337319	0.2035944044797954	-3.9804	14.73254959551335	14.537446938115682	14.727	14.834659515199114	14.81326870371433	14.779315754624989	15.029286046624389	14.917091514158123	14.838212183547476	15.38643436732575	15.429016500344312	15.473209587906371
Con_Pmod_vs_Con_Scr	I3L0L4|95	I3L0L4	ENDOV	S	95	GQPPQDHSPGPRTAP	0.24052751056293076	10.4294	3.3512341679279913	0.00682575	0.0870551	-2.43978	10.271891308836546	10.05944914985806	10.224937207068624	10.517714777177105	10.322149476762494	10.43799594351242	10.664024998402544	10.443502615865672	10.57139976986502	10.534219681669644	10.60855723452851	10.496662237479768
Con_Pmod_vs_Con_Scr	I3L2J0|2251	I3L2J0	CIC	S	2251	PLKKTFDSVDKVLSE	-0.108287	7.5112	-0.986699	0.3458573779348785	0.628226	-5.99182	7.472174552109663	7.204100534316486	7.424536739807969	7.153882696776336	7.41625	7.205817424099067	7.696608711606151	7.522237142009435	7.816377160040239	7.835267666519121	7.8481920912421055	7.539004974419745
Con_Pmod_vs_Con_Scr	I3L301|98	I3L301	TFAP4	S	98	RREAQQGSHSPADSR	0.12928497165391484	13.32564751452024	0.7748924198785074	0.4554035880739348	0.7169789746373487	-6.17729	12.72112761605217	13.509848077384216	12.983897257539692	13.203950934043792	13.1903	13.208469715720728	13.612795142820872	13.43262443925889	13.423285671859276	13.302481514774357	13.614486955597004	13.704495633018572
Con_Pmod_vs_Con_Scr	I3L4J1:Q9UN37|121:97	I3L4J1:Q9UN37	NA:VPS4A	S	121:97	SEGKGSDSDSEGDNP:SEGKGSDSDSEGDNP	-0.0771087	16.5903	-2.63976	0.023722748120166025	0.16837735754686287	-3.64615	16.65243524785501	16.677501598884184	16.648729241431585	16.561292137814995	16.60163071083869	16.584417150801908	16.560031807457293	16.565392111950885	16.63271556410379	16.55780956042791	16.549991651358003	16.492056296988153
Con_Pmod_vs_Con_Scr	I3L4J1:Q9UN37|123:99	I3L4J1:Q9UN37	NA:VPS4A	S	123:99	GKGSDSDSEGDNPEK:GKGSDSDSEGDNPEK	-0.143354	17.293692699910842	-3.07512	0.011045547600808482	0.11057499602738351	-2.90923	17.321576141534305	17.49854611998109	17.36685197003004	17.207105525872354	17.299867951613003	17.24993827856801	17.29478967732716	17.279381958022213	17.369077928637807	17.207965013285936	17.24803736380417	17.181174470254035
Con_Pmod_vs_Con_Scr	I3L521:Q9Y580|134:136	I3L521:Q9Y580	NA:RBM7	S	134:136	QIIQRSFSSPENFQR:QIIQRSFSSPENFQR	-0.139963	14.774279290134693	-1.81503	0.0979888	0.3466627165340571	-4.96074	14.911730458133068	14.588435021809818	14.83513092141715	14.735648253564229	14.534602989595436	14.645156441986993	15.022427055795983	14.906419924725135	14.889289181263488	14.740584852542062	14.740907435203132	14.741018945579812
Con_Pmod_vs_Con_Scr	I3L521:Q9Y580|135:137	I3L521:Q9Y580	NA:RBM7	S	135:137	IIQRSFSSPENFQRQ:IIQRSFSSPENFQRQ	-0.00658801	13.867759584231564	-0.164188	0.8726833390384204	0.9472160540573332	-6.47511	13.828626584399954	13.950918494057948	13.862119612930773	13.814655695208614	13.944613203275557	13.86263176435957	13.810503612538474	13.849449576531828	13.876235791454333	13.87815718834422	13.87932071256795	13.855882775109553
Con_Pmod_vs_Con_Scr	J3KN11|79	J3KN11	FKBP11	S	79	RCFWRHASHTLHGKL	-0.017844	17.678848148636813	-0.818807	0.4309860669380796	0.6982958246695288	-6.14202	17.80538788777167	17.807601815261425	17.805695696238182	17.796905538315897	17.77753958691515	17.790708223004053	17.537155649467262	17.552114274091977	17.52065288570874	17.577749928217923	17.572789128279222	17.60187717037028
Con_Pmod_vs_Con_Scr	J3KN67|209	J3KN67	TPM3	S	209	DQNLKCLSAAEEKYS	0.0558257	14.150525557466004	1.7710787334890443	0.1053601972165069	0.3584770290756649	-5.02494	14.088124892022188	14.085182538538618	14.092815804772489	14.104068698083182	14.19910710130486	14.13042455840855	14.126596408125891	14.107052391206356	14.16921167033689	14.252743682842707	14.257375882883569	14.19360306106674
Con_Pmod_vs_Con_Scr	J3KN83|225	J3KN83	CD44	S	225	LNGEASKSQEMVHLV	-0.112437	19.546948174298777	-1.46787	0.17128164593640025	0.45309069923468936	-5.44289	19.62327263966609	19.46708442750641	19.604789900103462	19.5052	19.40313318442263	19.449475127706265	19.545352670094744	19.252570468967413	19.475790953953585	19.729198279913124	19.852754667087037	19.654727090321252
Con_Pmod_vs_Con_Scr	J3KNZ9|333	J3KNZ9	FBRS	S	333	PQLQLRVSPFGLRTS	-0.212757	17.9013	-2.54681	0.027924365444283866	0.18230218753765298	-3.80147	18.09356306265103	17.999302618677355	18.087644430302596	17.81698356013181	17.90608270798834	17.819174143760186	17.93239398594801	18.155763779012375	17.82007650720061	17.718430347417648	17.600794651245213	17.865081658670814
Con_Pmod_vs_Con_Scr	J3KP75|56	J3KP75	PHACTR2	S	56	GRSQSDLSSSSSRGR	-0.0761412	17.83519717755867	-1.86059	0.0908495	0.33283750711750976	-4.89336	17.98368279281199	18.016827458917703	17.969479608899352	17.890041068189078	17.92814139868371	17.923383724693206	17.592474440519116	17.602815640224193	17.721112460640104	17.842979251106218	17.82525349872196	17.72617478729738
Con_Pmod_vs_Con_Scr	J3KP75|72	J3KP75	PHACTR2	S	72	LRVHISGSVDGLDKA	0.0363778	17.001734429550865	1.1865707325915256	0.261405	0.552409	-5.7835	17.050250955692455	16.969022463839437	17.017101680629246	17.035644282039996	17.06249938140668	17.04736488753641	16.82508326899154	16.895917074036998	16.870790061599802	17.120745200891125	17.0578	17.068580007957674
Con_Pmod_vs_Con_Scr	J3KTD8|46	J3KTD8	CBFB	S	46	ARRQQDPSPGSNLGG	-0.0537373	15.057309434501104	-1.28632	0.2258153649170806	0.5166299490949456	-5.66862	15.030454294815558	14.892943252356094	14.98516157778365	14.967194485012406	14.852067762216391	14.928084974864412	15.162593804653918	15.191378994347764	15.118418712029984	15.195126717515103	15.15204863117376	15.212240007244196
Con_Pmod_vs_Con_Scr	J3KTL2|249	J3KTL2	SRSF1	S	249	SRSRSHISEEMD___	0.13105890527553932	14.786762455077039	3.6455598447839628	0.00411238	0.0665104	-1.94267	14.570527132108603	14.714199271989813	14.603855893485292	14.741338638358616	14.775052955163959	14.765367419887747	14.943538525255104	14.939120639453034	14.990189071552535	14.78992809909692	14.819545925517431	14.78848588905542
Con_Pmod_vs_Con_Scr	J3QQQ9:P61254|23:23	J3QQQ9:P61254	NA:RPL26	S	23:23:00	KRHFNAPSHIRRKIM:KRHFNAPSHIRRKIM	0.25397957623396294	17.95101980390385	4.218822516809063	0.0015738	0.042570032796963524	-0.995942	18.085233615569777	18.187585195812716	18.0867	18.347394126082296	18.38545082043226	18.388631826859108	17.69614040201116	17.644150526772005	17.859981200264855	17.618255889990426	17.643516260192175	17.469178549570138
Con_Pmod_vs_Con_Scr	J3QQU0|103;104	J3QQU0	IMPACT	T;T	103;104	ENYIKLITTKK____;NYIKLITTKK_____	-0.0576482	18.139653716956968	-1.90839	0.0838749	0.31980014978756005	-4.82177	18.13067775392796	18.197276418047796	18.152459542893148	18.103780426879364	18.100875875196515	18.10281270070884	18.231014926802096	18.26883076655667	18.196833000875753	18.03974478129524	18.04156349233567	18.10997491796456
Con_Pmod_vs_Con_Scr	K7EII0|4	K7EII0	SAFB	S	4	____SRDSESHRSPS	-0.0383782	14.409365788333378	-1.14313	0.2782361597727379	0.5690428248347758	-5.83133	14.38929490812411	14.43388307350197	14.431789807226783	14.341915238001512	14.44479730687476	14.353120690431656	14.419389442610145	14.38467685577671	14.354954424363529	14.419631172833467	14.461222478123302	14.477714062132591
Con_Pmod_vs_Con_Scr	K7EL81|364	K7EL81	PPP1R12C	S	364	PPHPSPKSPVLEEAP	0.0730346	16.65602203838036	1.910393629482868	0.0835941	0.3195738545901537	-4.81876	16.593587033531115	16.603567007561434	16.57899025004796	16.617179576368027	16.71571122400382	16.662357440485547	16.480209799389048	16.557831481780294	16.59668865770682	16.872147360054914	16.81745315586115	16.776541473774202
Con_Pmod_vs_Con_Scr	K7ENH8|193	K7ENH8	TCF3	S	193	APRARTSSTDEVLSL	0.028852767935802603	8.534041215811486	1.0815414325962878	0.30353487703218784	0.5925401187614966	-5.89677	8.420534687905839	8.45157	8.446298099203592	8.437763020398073	8.516483695748853	8.450713768757911	8.636393933963936	8.627567914338822	8.60849	8.588740416689031	8.60712	8.616816809071853
Con_Pmod_vs_Con_Scr	K7EQG2:A0A087WZ13|35:617	K7EQG2:A0A087WZ13	NA:RAVER1	S	35:617	GPSRHKMSPPPSGFG:GPSRHKMSPPPSGFG	0.0200807	16.123816598227943	0.6516104675738054	0.5285778739209349	0.7694340467309595	-6.26691	16.13613757317414	16.047908968016138	16.10480379415856	16.15646356533036	16.064511576669954	16.128117355132396	16.216223160265614	16.201997168154186	16.19854329197756	16.084331435481115	16.071457230262816	16.075304060112472
Con_Pmod_vs_Con_Scr	K7ER55|14;19	K7ER55	ZNF540	Y;T	14;19	PGIRPRNYLQKRTFM;RNYLQKRTFMKSVYP	0.13920265807555943	12.094335634414158	2.8603180085387865	0.0161012	0.1367618222437562	-3.27415	12.064327311410803	12.074022041642978	12.028653350145172	12.19585517705315	12.172314971215911	12.216440529156577	12.023135424592075	12.226597516875106	12.114209891796826	12.050391030772929	11.931764579391546	12.03431578891682
Con_Pmod_vs_Con_Scr	K7ERI8:P51148|124:124	K7ERI8:P51148	NA:RAB5C	S	124:124	KELQRQASPNIVIAL:KELQRQASPNIVIAL	-0.0321283	12.55724442855071	-1.01746	0.33167973636820625	0.6170623291990299	-5.96177	12.594951564780445	12.588581051297291	12.6044	12.59961911992933	12.525226862241253	12.566751392257848	12.569474150129883	12.527791542895535	12.48405796804334	12.505942055701754	12.538331045156117	12.581756597373127
Con_Pmod_vs_Con_Scr	K7ESF5|12	K7ESF5	SLC44A2	T	12	RKNGAYGTPQKYDPT	-0.200003	12.237089421614366	-1.8463	0.0930349	0.33784349202788705	-4.91458	11.974944196680305	12.304320042809472	12.06833480528702	11.996427526941648	11.79654611745235	11.954617182759591	12.34751895343102	12.017882604414837	12.310603655643504	12.588452987998153	12.839088816169392	12.646336169785092
Con_Pmod_vs_Con_Scr	L7N2F9:P23763:P63027:Q15836|61:63:61:44	L7N2F9:P23763:P63027:Q15836	NA:VAMP1:VAMP2:VAMP3	S	61:63:61:44	LERDQKLSELDDRAD:LERDQKLSELDDRAD:LERDQKLSELDDRAD:LERDQKLSELDDRAD	0.0953533	13.79995702157124	1.0727577422145922	0.30728179480696116	0.595497	-5.90587	13.78958179224685	14.018898631143845	13.79532631155013	13.87049224435317	14.037635547021862	13.981738841246544	13.441716224190689	13.588539370088403	13.756165363313862	13.862866025773425	13.7936	13.662922614061092
Con_Pmod_vs_Con_Scr	L7N2F9:P63027:Q15836|61:61:44	L7N2F9:P63027:Q15836	NA:VAMP2:VAMP3	S	61:61:44	LERDQKLSELDDRAD:LERDQKLSELDDRAD:LERDQKLSELDDRAD	-0.0640933	17.811791745322587	-0.675843	0.5136681187199958	0.7599907278237457	-6.25041	17.71555303152102	17.96536315992187	17.73075450171243	17.61781630409945	17.85366261007523	17.747911991218544	17.67641628485932	17.88358404915872	17.994905674750232	17.944386045124254	17.849672229839936	17.76147506159003
Con_Pmod_vs_Con_Scr	L7N2F9:P63027:Q15836|75:75:58	L7N2F9:P63027:Q15836	NA:VAMP2:VAMP3	S	75:75:58	DALQAGASQFETSAA:DALQAGASQFETSAA:DALQAGASQFETSAA	0.13743918769858254	17.033791798769673	2.3249693382840397	0.0411318	0.22414896495074874	-4.16685	17.0483	16.918269586361227	17.006680992626585	17.227512393688755	17.002364195789045	17.155731252609144	17.12444261460217	16.975053278211334	17.06532760483222	16.948782425889224	16.999683379476377	16.933314161146587
Con_Pmod_vs_Con_Scr	M0QXQ4|165	M0QXQ4	NUMBL	S	165	PAQPGHVSPTPATTS	0.0561844	13.311579034052782	1.0855128293498513	0.30185223998652577	0.5909016117191369	-5.89263	13.36740215595369	13.289419530839774	13.366904672052833	13.451677778162356	13.344838087085748	13.395763594605777	13.30062183836693	13.284911003536063	13.14243009826516	13.21548619682136	13.22857456200496	13.350918890938733
Con_Pmod_vs_Con_Scr	M0QZR4|430	M0QZR4	ARHGEF1	T	430	LGPARRATPEPGDEG	0.0566521	12.758578124501039	1.6076993335320597	0.13735931288279685	0.40965723679460425	-5.25592	12.818684731132196	12.763679154533063	12.783155684897936	12.822389011847172	12.865234739485857	12.84785211154649	12.606594726999283	12.717932569583825	12.691976190323285	12.779881768165714	12.69605959845467	12.709497207042974
Con_Pmod_vs_Con_Scr	M0R171|8;11	M0R171	ZNF468	S;T	8;11	MALPQVPSLVTQCHE;PQVPSLVTQCHELGK	0.050012036129240656	14.659422479260561	0.8485925115212902	0.414929	0.6866482186480098	-6.11713	14.622034188886028	14.62570912501138	14.59076542434408	14.61146725496421	14.71151314609765	14.665564445567348	14.593361849195428	14.84467396037785	14.718860950077312	14.70823427746581	14.560601363503997	14.660283765635636
Con_Pmod_vs_Con_Scr	M0R2Q7|140	M0R2Q7	SIPA1L3	S	140	EQERDTGSPQKGLQR	-0.0703843	11.590563320098452	-1.19608	0.25782867804821835	0.5483948679079089	-5.77284	11.546025560076142	11.779811976603243	11.588982081314825	11.59332544800597	11.513943144660695	11.596398238798628	11.625980075073567	11.717055083532756	11.633014361294194	11.458117307170536	11.463598613100803	11.57050795155007
Con_Pmod_vs_Con_Scr	O00116|65	O00116	AGPS	S	65	CKARRAASAATAAPT	-0.00379198	14.508409020323874	-0.0733243	0.9429183977630342	0.9776317273907694	-6.48663	14.565263193032598	14.3733	14.51676897225045	14.548686575629809	14.405001249367048	14.490246585147824	14.58782771926128	14.488827707224068	14.517931240879468	14.536715897213828	14.550435263970252	14.519925655238676
Con_Pmod_vs_Con_Scr	O00151|90	O00151	PDLIM1	S	90	RSEHKVWSPLVTEEG	-0.0818874	20.80691751929808	-0.964492	0.35636607115237096	0.6381809984006643	-6.01304	20.913655854367995	21.30871104086761	21.046135319051334	20.98051362222059	21.040286518959572	21.002039908396902	20.63754916042668	20.619407553527655	20.555745176783088	20.41806851610292	20.536383987970588	20.62451357290201
Con_Pmod_vs_Con_Scr	O00159|1015	O00159	MYO1C	S	1015	LSANRVNSININQGS	0.0397829	12.855815143595134	1.178236244008075	0.2645703581860135	0.5553074778272187	-5.79278	12.797750517106126	12.687096797587612	12.772483826460547	12.82371155355133	12.760080601498876	12.792887747808235	12.968695098635765	12.963564816829846	12.909661111126995	12.928168965588608	12.912700095493737	12.952980591453931
Con_Pmod_vs_Con_Scr	O00159|139	O00159	MYO1C	S	139	RDQAVMISGESGAGK	-0.0612684	18.351043483922773	-1.51526	0.15905049563072998	0.4381190614202078	-5.38073	18.43827580837753	18.482515663644502	18.4792	18.40354514160894	18.4215	18.39112842696182	18.22405461863004	18.06804358217698	18.15532421655361	18.338931151858823	18.442012640015037	18.36805927388561
Con_Pmod_vs_Con_Scr	O00159|408	O00159	MYO1C	S	408	LASKDVESPSWRSTT	-0.101287	16.764484540965697	-1.99399	0.072614	0.29878597516026045	-4.69151	16.527514244068566	16.590357006666633	16.576640637858628	16.50862819986341	16.420920495266778	16.46110357480489	17.10051716848536	16.916784176719023	16.95827587080305	16.95737999290986	17.08887973095532	17.06681339318684
Con_Pmod_vs_Con_Scr	O00159|410	O00159	MYO1C	S	410	SKDVESPSWRSTTVL	-0.147007	19.72081737362953	-2.86774	0.015892687589073595	0.13622303647777367	-3.26157	19.67844132938472	19.693038554874196	19.660193379040063	19.62065163913407	19.39937922896489	19.570622668933407	19.920523682016256	19.823034625143706	19.91633666894535	19.77364142515252	19.823162969174145	19.77078231279101
Con_Pmod_vs_Con_Scr	O00159|736	O00159	MYO1C	S	736	ALEVRRQSLATKIQA	-0.0224546	19.024772732468293	-0.704778	0.4961980599551308	0.7488925670486767	-6.22998	18.97574849731292	18.94404825647269	18.9637	18.91908745939226	18.962297269935913	18.934737756672252	19.132781152943544	19.10184977769141	19.18853616855944	19.085104468947105	19.08542129158276	19.003971270613633
Con_Pmod_vs_Con_Scr	O00159|864	O00159	MYO1C	S	864	WKYCRSISPEWKQQL	0.016957227748470416	15.435270097716488	0.4423670534726126	0.6671464327161197	0.8520085530725691	-6.3858	15.362426050816488	15.295179938141002	15.368100405827896	15.352839144242385	15.38241895379447	15.341319979993925	15.541823534881404	15.41090990228072	15.49723557791633	15.545755349937284	15.605587567747188	15.51964476701876
Con_Pmod_vs_Con_Scr	O00161|110	O00161	SNAP23	S	110	WGDGGENSPCNVVSK	-0.0382176	15.784984606931642	-0.702982	0.49727167778780246	0.7495977768296431	-6.23127	16.026174705164262	16.027001288824074	15.980665138761523	16.06735042574794	15.825927382230036	16.025910471569823	15.520736697218204	15.598827031873771	15.551151565913072	15.609177641850312	15.558293925728233	15.628599008298464
Con_Pmod_vs_Con_Scr	O00161|161	O00161	SNAP23	S	161	ENLTQVGSILGNLKD	0.00762885	19.184074752117805	0.1286577459591702	0.9000458753020805	0.9606026152993098	-6.48066	19.447926725285747	19.407390151997312	19.38214068377747	19.527838391697696	19.251533086003285	19.480972630033406	18.97502457231441	19.020439516892615	19.03787587272435	18.920901186621215	18.870951994718208	18.88590221334794
Con_Pmod_vs_Con_Scr	O00161|20	O00161	SNAP23	S	20	AHQITDESLESTRRI	-0.0586475	17.834535799557777	-1.68188	0.12188572234278637	0.3878761583588302	-5.15261	17.84004556462305	17.945514993730196	17.88726350717314	17.79104467977326	17.891692232904436	17.814144734087243	17.84006335069609	17.840739714147325	17.81540193899257	17.75519910692099	17.7864	17.806957389459022
Con_Pmod_vs_Con_Scr	O00161|5	O00161	SNAP23	S	5	___MDNLSSEEIQQR	-0.141751	16.99661671200444	-1.54191	0.1525091367454662	0.4290538373913372	-5.34521	16.94677238979447	17.307197802542166	17.05756348470001	17.01502666255208	16.88374523523736	16.98750997943632	16.960526170402368	16.733807987430477	16.888385544751728	16.944870590161777	17.156966462487787	17.07702823455674
Con_Pmod_vs_Con_Scr	O00178|25	O00178	GTPBP1	S	25	MFAPEPSSPGAARAA	0.042923262043391475	16.242520597453623	1.545706870054791	0.15159668928851577	0.4277632104763592	-5.34012	16.236564464778436	16.150477084761704	16.212865987727792	16.25619559090239	16.229947997221082	16.242533735274634	16.294233377603664	16.31669354540391	16.272741692467502	16.241827062978256	16.212612108443228	16.243554521880874
Con_Pmod_vs_Con_Scr	O00178|580	O00178	GTPBP1	S	580	LLQTTNNSPMNSKPQ	0.0314258	12.348778099772991	0.6115648302547471	0.5537626390033772	0.7833476937803214	-6.29297	12.148475243837524	12.283436467180351	12.178499966103008	12.168669250357173	12.308754677749528	12.2273	12.406219350445712	12.404620505490383	12.524994732801192	12.534388635554873	12.55109113166009	12.44892217910875
Con_Pmod_vs_Con_Scr	O00192|203	O00192	ARVCF	S	203	RDSPSYGSLSRGLGM	0.0392687	19.099897732505188	1.472261223523022	0.17011559587469774	0.45151689584156496	-5.43719	19.17382652272365	19.219430597704733	19.168354504649916	19.248002984950997	19.186518837090695	19.24489593662533	18.940438206899028	18.97705632126489	18.97021895065443	19.02669418663143	19.012254505232143	19.031081235635025
Con_Pmod_vs_Con_Scr	O00192|335	O00192	ARVCF	S	335	PERGSMGSLDRLVRR	0.0652224	15.950170465069107	2.044948622903597	0.0665987	0.2878528178088349	-4.61276	15.87565464455948	15.875368341484627	15.880622034469454	15.90212669613248	15.997973020608606	15.92721236988045	15.841212798770284	15.918817667223117	15.851651950156622	16.121473725732308	16.081713782951226	16.12821854886062
Con_Pmod_vs_Con_Scr	O00192|343	O00192	ARVCF	S	343	LDRLVRRSPSVDSAR	0.10285556778375415	14.0554	2.1953034008499372	0.051479139351663386	0.2521439597294611	-4.37586	14.038210942250457	13.962378847689278	14.036785285943555	14.03674901641254	14.231339243377484	14.077853519444528	13.911469269733573	13.976125785016144	13.92582260895597	14.184739385664685	14.135353784192429	14.14765568197855
Con_Pmod_vs_Con_Scr	O00192|345	O00192	ARVCF	S	345	RLVRRSPSVDSARKE	0.3520811014402687	7.101093491552311	7.902527429974798	9.424029535908766e-6	0.00417938	3.9607367383963927	6.835869142661778	6.756890283900589	6.833936866295491	7.089700757292912	7.267002761530924	7.126236078354827	7.125919392741841	7.120373619343947	7.152663616336046	7.331147869259008	7.314945360668917	7.25844
Con_Pmod_vs_Con_Scr	O00192|642	O00192	ARVCF	T	642	EMDRNFDTLDLPKRT	0.10844671229407155	18.71982164806595	1.659182118572278	0.1264467926276875	0.3950527012273313	-5.18451	18.703906577651026	18.72007964493408	18.709358837069644	18.694770091507124	18.979355395300896	18.784559709728953	18.466214616288667	18.56815363182515	18.60784647834666	18.865724282799988	18.80010307802781	18.737787433311375
Con_Pmod_vs_Con_Scr	O00192|916	O00192	ARVCF	S	916	RRPRGASSAGEASEK	-0.028227	19.055853519869594	-0.425222	0.6792095221796246	0.8577695273605757	-6.39362	18.988636696970076	19.070399376218383	19.019349658509658	18.871887245399424	19.16008209518901	18.96173534833934	18.959507256827116	18.99956293318306	19.08925250928152	19.22682306760925	19.21092112360815	19.112084927300153
Con_Pmod_vs_Con_Scr	O00203|276	O00203	AP3B1	S	276	NGKNFYESDDDQKEK	-0.0319063	21.218631986465056	-0.779112	0.4530189851952209	0.7152931345187699	-6.17397	21.23470641967421	21.234356523853272	21.223587939306956	21.16896951851304	21.229626263735323	21.198336309199963	21.244973605606475	21.216058731647173	21.346	21.214540034841615	21.21424762818279	21.098219029014157
Con_Pmod_vs_Con_Scr	O00203|609	O00203	AP3B1	S	609	KPAPLLESPFKDRDH	0.7204641361465143	16.003862405905767	20.171352739438355	8.961716822612902e-10	1.182946620584903e-5	11.1415	15.17418139883265	15.18457463927129	15.160308286346018	15.939130346446117	15.8236	15.917686196314277	16.542912333761258	16.480008515369512	16.56882475974698	16.41985820552718	16.447974717835965	16.387249281288856
Con_Pmod_vs_Con_Scr	O00203|671	O00203	AP3B1	S	671	GKAKQENSAKKFYSE	-0.0234896	13.572301292471145	-0.350665	0.732734	0.8819269544800298	-6.42412	13.666194066542069	13.652474814152196	13.612238802409642	13.556666621523842	13.673755297855823	13.630016881632995	13.54466187966323	13.806251356652842	13.761882721698026	13.42624881070205	13.254466891244244	13.282757365576794
Con_Pmod_vs_Con_Scr	O00203|752	O00203	AP3B1	S	752	KAKGKSDSEDGEKEN	-0.0873272	16.639069084489172	-0.826294	0.4269116073825897	0.6950213637703729	-6.13583	16.568754607812835	16.52272686668717	16.594633395395427	16.405113118505966	16.583861756833578	16.435158306625592	16.651623281710012	16.32182001413357	16.70620261487403	16.97436607968316	17.129466883567233	16.77510208804148
Con_Pmod_vs_Con_Scr	O00231|14	O00231	PSMD11	S	14	VEFQRAQSLLSTDRE	-0.104712	19.430177309354324	-2.37184	0.0379115	0.21607583572688713	-4.09039	19.478824951975348	19.611175690003453	19.496506790305965	19.3912	19.45080908642472	19.430358579472763	19.397347771188723	19.537501897371996	19.468080798766135	19.311463197215534	19.26012552027589	19.328730821341676
Con_Pmod_vs_Con_Scr	O00255|487	O00255	MEN1	S	487	RRGPRRESKPEEPPP	-0.147455	13.840629159868797	-3.15977	0.00952565	0.10314898178065916	-2.7652	13.601660817951096	13.78474029514222	13.66389879852896	13.491070919970102	13.591957762858495	13.524907476627414	14.29974525153022	14.24732774544979	14.320779120230773	13.825588678377976	13.895234948351678	13.840638103406835
Con_Pmod_vs_Con_Scr	O00257|291	O00257	CBX4	S	291	VAEGEARSPSHKKRA	-0.0767683	15.26873556244279	-1.42194	0.18389846889729716	0.4696546779616785	-5.50191	15.171476634394512	15.080749172900749	15.19648672061889	15.012610888656386	15.18210633314249	15.023690539054275	15.463445708730244	15.322630448500629	15.392824563441543	15.445615941235754	15.512524276826706	15.420665521811314
Con_Pmod_vs_Con_Scr	O00264|180	O00264	PGRMC1	Y	180	EGEEPTVYSDEEEPK	0.032991366697981306	18.06750398099051	0.5549447660001738	0.5904924533362341	0.8053243324223688	-6.32717	18.151936393044288	18.0213	18.075553712419836	18.08283944623195	18.139572793561115	18.12534957264769	18.037921368746712	18.149121669402295	18.22903168499406	18.03984162851598	17.921021557599456	17.836560337840037
Con_Pmod_vs_Con_Scr	O00264|181	O00264	PGRMC1	S	181	GEEPTVYSDEEEPKD	-0.0520391	23.415065009869256	-0.927654	0.3743029791103658	0.6537178253846029	-6.04735	23.456746392295877	23.444195569734745	23.46325840223831	23.35769409745907	23.46449085391778	23.38589816152306	23.30215572333704	23.17390588794992	23.37069038675675	23.54446104507614	23.59913867087982	23.418144927262546
Con_Pmod_vs_Con_Scr	O00264|57	O00264	PGRMC1	S	57	QPAASGDSDDDEPPP	0.17732903442067638	21.20192033367475	0.8527793621500869	0.4127049124363449	0.6848649987344898	-6.11357	21.2328	20.686	21.1306	21.431525496132647	20.946840413845084	21.20298484837029	21.541785661916744	21.62642366748383	20.994890905570436	21.09810572502053	21.002658562857068	21.52846506781437
Con_Pmod_vs_Con_Scr	O00267|666	O00267	SUPT5H	S	666	VGGFAPMSPRISSPM	-0.198348	13.607953651901195	-4.58841	8.661792007831271e-4	0.0323839	-0.406579	13.748880185460637	13.646703575601524	13.724040325731512	13.468382933821983	13.566816123503845	13.489380354555268	13.592197785353314	13.708250982376809	13.602870618597832	13.615932860835748	13.532011011571964	13.599977065403891
Con_Pmod_vs_Con_Scr	O00273|195	O00273	DFFA	Y	195	SKQLLQLYLQALEKE	0.0708571	13.355443756375589	1.9963611218156567	0.0723229	0.2981456847923073	-4.68786	13.396727414093798	13.346488294524391	13.355732940856887	13.487753308330516	13.358891088579163	13.4649	13.226478525582284	13.28135282546382	13.2529	13.384904854717243	13.33716657386118	13.37205450792449
Con_Pmod_vs_Con_Scr	O00273|315	O00273	DFFA	S	315	SISASKASPPGDLQN	0.013733489531574605	16.77847459547664	0.5693488985454438	0.5810269762998921	0.799718	-6.31876	16.745363711124654	16.79371834751656	16.769139983516656	16.781037372168658	16.78983501724801	16.778550121335925	16.736585263761523	16.701187672376285	16.704018904746917	16.823503153718484	16.858916364315494	16.859839233890526
Con_Pmod_vs_Con_Scr	O00299|211	O00299	CLIC1	S	211	RGVHRYLSNAYAREE	-0.0204003	13.945032310510918	-0.44431	0.665785	0.8518137461553025	-6.3849	13.747910982894568	13.679204281304866	13.72126050190406	13.766634308922818	13.604226337004953	13.716314230981556	14.292603842134614	14.319364088729085	14.217324365387157	14.073815945415149	14.052184211259124	14.149544630193056
Con_Pmod_vs_Con_Scr	O00303|258	O00303	EIF3F	S	258	LIMKTCFSPNRVIGL	0.17285595552830024	10.918865992950648	2.2341182144225793	0.048144267880897734	0.24494408164252654	-4.31371	10.92869248882068	11.108182596064244	10.89952473189547	11.254193742041668	10.966441952030012	11.23433198929362	10.743331510792236	10.850457643823669	10.879968487355905	10.73783087903753	10.695907847446524	10.727528046806224
Con_Pmod_vs_Con_Scr	O00308|211	O00308	WWP2	S	211	TPATGEQSPGARSRH	-0.0404098	15.890699715682132	-1.33231	0.21079342369577436	0.5008051102923365	-5.6134	15.940673395504817	15.868598880204376	15.931755466924846	15.887772470169663	15.863394697821082	15.86863127187518	15.961867524900358	15.877746162353152	15.928016864578767	15.848664078543193	15.880081657990369	15.831194117319788
Con_Pmod_vs_Con_Scr	O00391|426	O00391	QSOX1	S	426	ARQNVDHSQEAAKAK	-0.0734258	15.8112	-1.65305	0.1277050425525833	0.39701049498212426	-5.19308	15.6133	15.478942060499577	15.598593810323514	15.535959950150824	15.450588276953178	15.483997180443406	16.206004154689133	16.13339148124917	16.078064522683533	16.022195923232363	16.046870046222917	16.0866
Con_Pmod_vs_Con_Scr	O00399|186	O00399	DCTN6	T	186	KTMKGSSTPVKN___	-0.0369054	13.217413744473019	-0.529521	0.6073960522120025	0.8168162507850043	-6.34151	13.26547585611455	13.245605729866837	13.21389434640951	13.148139859205289	13.249555740838298	13.216564233429096	13.187567136026264	13.266637229845731	13.441137273498256	13.233909450785829	13.148885992852136	12.991592084804438
Con_Pmod_vs_Con_Scr	O00409|391	O00409	FOXN3	S	391	FRSHESPSDTEEDDR	-0.0742591	12.328334869748682	-1.67039	0.12417647469445492	0.39138716952406993	-5.16879	12.197642912699973	12.333548995045303	12.27046222340466	12.15478549279367	12.25663701468554	12.167454221654287	12.50597766532078	12.418253531672784	12.431907844158689	12.343195935576952	12.435558532492005	12.42459406747954
Con_Pmod_vs_Con_Scr	O00418|18	O00418	EEF2K	S	18	EGVDGGQSPRAGHDG	-0.0251662	15.207013698009087	-0.918922	0.37864680253997296	0.6571346335880077	-6.05532	15.340440979853144	15.350133260219186	15.349115489271108	15.350292423234013	15.287710680572888	15.32618805664346	15.045864871443884	15.01844888661383	14.986852676026356	15.11519032950187	15.13994704199941	15.173979680729898
Con_Pmod_vs_Con_Scr	O00418|443	O00418	EEF2K	Y	443	ENSGDSGYPSEKRGE	0.0167914	16.46988183078307	0.38164873759887386	0.7102891018353976	0.8726101542140913	-6.41213	16.63799876845433	16.550580955657388	16.589441377409937	16.68911337712538	16.496497026483734	16.642784828607162	16.31986058265566	16.30867235693281	16.317798950957634	16.37290581046568	16.35373922394518	16.359188710701932
Con_Pmod_vs_Con_Scr	O00418|445	O00418	EEF2K	S	445	SGDSGYPSEKRGELD	-0.0519272	15.471855388307143	-0.870242	0.40351561177646467	0.6775823584886667	-6.09855	15.670322788786237	15.726417418032456	15.663	15.680976656490992	15.55698751088202	15.66600933614754	15.238228686351452	15.09469988635488	15.313782930505688	15.357408785064209	15.429821452772536	15.264594346347009
Con_Pmod_vs_Con_Scr	O00418|462	O00418	EEF2K	S	462	EPREHGHSYSNRKYE	0.018318517285708324	9.953089378304341	0.35979268022458777	0.7260935636191352	0.8789724424903744	-6.42069	9.903565589004629	9.819376828296088	9.895617997645449	9.929283196669555	9.856598222841694	9.887634547292045	10.057691347013328	10.099155439040622	9.928181000040992	9.987008650550464	9.965076695663765	10.10788302559346
Con_Pmod_vs_Con_Scr	O00418|464	O00418	EEF2K	S	464	REHGHSYSNRKYESD	0.0700981	7.512119731869214	0.8778286761945859	0.39956749279560266	0.6744617525450071	-6.09195	7.463344148689005	7.35605	7.431210944393658	7.644412889089935	7.288130254561005	7.528356039257706	7.718339386342595	7.590875140434293	7.55075	7.464608961243377	7.524354391293011	7.585008764196171
Con_Pmod_vs_Con_Scr	O00418|474	O00418	EEF2K	S	474	KYESDEDSLGSSGRV	-0.0670954	9.886658465014794	-1.03325	0.32457098434772225	0.6116582466414456	-5.94605	10.036599188550198	9.778243021127004	9.926398833829989	9.883471090902944	9.78693	9.869557781605494	9.815096288690532	9.8706	9.926182283011888	10.009911353549764	9.899120580232754	9.837794450990284
Con_Pmod_vs_Con_Scr	O00418|500	O00418	EEF2K	S	500	RLHLPRASAVALEVQ	-0.128621	12.195555434910988	-1.66426	0.12541312842628313	0.39315763722851926	-5.17739	12.110404156875184	12.359974547817778	12.116602431518242	12.100223130624604	11.978936514278514	12.121958730434462	12.29272355904694	12.522363485296902	12.414858194992837	12.11895802985662	12.036508949886173	12.1732
Con_Pmod_vs_Con_Scr	O00421|329	O00421	CCRL2	S	329	PLQPRGQSAQGTSRE	-0.210865	8.225252488259144	-1.99274	0.0727678	0.29895278729307856	-4.69343	7.76348	8.268205608108714	7.849606578557961	7.730341609648829	7.720855897947864	7.797498848443022	8.672549272253756	8.73991	8.86918	8.412019610293191	8.464763429902147	8.41462
Con_Pmod_vs_Con_Scr	O00423|147	O00423	EML1	S	147	SPGGRRESNGDSRGN	-0.10123	12.455323472162773	-0.993219	0.3428156181105574	0.6266694410130744	-5.98551	12.29390406635354	12.491000075276816	12.405146207724265	12.39567690154944	12.192916210476923	12.297768687935264	12.844594387073991	12.642349893498384	12.51177857714905	12.278865028759927	12.480577125421672	12.629304504733996
Con_Pmod_vs_Con_Scr	O00425|184	O00425	IGF2BP3	S	184	RGSSRQGSPGSVSKQ	-0.0216104	17.4911	-0.51406	0.6177950147782909	0.8237266863710545	-6.34992	17.864591087025026	17.79992996588382	17.842906620223076	17.788364365530338	17.84637535728663	17.807856600403436	17.128626659584203	17.078490095174175	17.204683942196063	17.21757201745512	17.216996990087328	17.096872606733626
Con_Pmod_vs_Con_Scr	O00425|187	O00425	IGF2BP3	S	187	SRQGSPGSVSKQKPC	0.043044636947506376	12.001746114039367	0.5211171761939071	0.6130372267401816	0.8209146058330624	-6.34611	12.13527401024105	12.187950055390443	12.178028265335652	12.339189575253512	12.058079806801658	12.2331	11.859436963624038	11.605716213616498	11.634699710506968	11.810782386526247	11.985180893726032	11.993498627695804
Con_Pmod_vs_Con_Scr	O00425|528	O00425	IGF2BP3	T	528	VVVPRDQTPDENDQV	-0.0176898	13.246554059623811	-0.369358	0.7191597848258855	0.8761257302079225	-6.417	13.414867339517263	13.485851824555285	13.467001160282985	13.432063864026034	13.463666862649262	13.41892021757356	13.07584698069214	13.07892031516822	12.939822656225234	12.995042747408627	13.033452376262828	13.153192371124296
Con_Pmod_vs_Con_Scr	O00429|616	O00429	DNM1L	S	616	PIPIMPASPQKGHAV	-0.059245	18.68017912834885	-2.70611	0.021113062650603524	0.1567978367494743	-3.53468	18.69202942006386	18.71192662916525	18.693964982598853	18.654661062942747	18.6185	18.646983356819774	18.75197490028568	18.75460128363512	18.74353008900271	18.62346227320613	18.627387008683748	18.643087057480933
Con_Pmod_vs_Con_Scr	O00443|259	O00443	PIK3C2A	S	259	KVSNLQVSPKSEDIS	0.0446271	18.408842687409475	1.2471538787491134	0.23929076935159924	0.531656	-5.71455	18.38101232694352	18.413739291433345	18.38872355585297	18.38022274584324	18.51280215503585	18.424331612429707	18.33363885795391	18.408081837248684	18.397229948011606	18.447939966188983	18.40979697890931	18.408592973062554
Con_Pmod_vs_Con_Scr	O00443|338	O00443	PIK3C2A	S	338	ATVTRSQSLNIRTTQ	0.10343976828864854	19.27337562754411	2.555810566033941	0.0274871	0.18067854332310987	-3.78648	19.404699266499932	19.31293349989736	19.35336119473002	19.482423811495167	19.421945350530816	19.476944103967263	19.141798120299725	19.267761535785183	19.18345539150134	19.11844134116813	19.023070095004677	19.0937
Con_Pmod_vs_Con_Scr	O00443|60	O00443	PIK3C2A	S	60	RGFELSSSTRKKAQV	0.0839834	16.64297035971799	2.5158744949796463	0.029479182671729182	0.18803466548096115	-3.85291	16.649308793107593	16.638921353154608	16.6247	16.710811024243903	16.72241532401283	16.731649784183617	16.572287774082604	16.5946	16.673945693560754	16.641957942377918	16.611467111097063	16.54355486030069
Con_Pmod_vs_Con_Scr	O00461|364	O00461	GOLIM4	S	364	LEEEHDPSPEEQDRE	-0.0115467	11.746963546357904	-0.204293	0.842008	0.9343061900322663	-6.46723	11.805172719078165	11.642645150707644	11.782005032708442	11.695951919216004	11.799089408837144	11.700141604086514	11.699031853543383	11.804773365793416	11.633310137301224	11.81546779681526	11.735185599429398	11.85078796877825
Con_Pmod_vs_Con_Scr	O00461|483	O00461	GOLIM4	Y	483	QLRQQAHYDAMDNDI	-0.00806646	14.577552297481208	-0.230147	0.822375	0.9259083983232822	-6.46125	14.62725704562613	14.680348471473492	14.6415	14.615629824511922	14.673768804917058	14.635515391903102	14.456432615682914	14.555552265457006	14.45805349568994	14.526429727857424	14.488805641603456	14.571326406734649
Con_Pmod_vs_Con_Scr	O00461|538	O00461	GOLIM4	S	538	PREADPESEADRAAV	0.16294623553042342	11.910471630452156	2.5256045525692192	0.028981121782353417	0.18646005586232756	-3.83674	12.046185250454034	11.98909217985155	12.088343870007822	12.212431871763474	12.231676612899456	12.16835152224175	11.684563277267207	11.633883856297343	11.4467	11.724669683445722	11.776890126680104	11.922910504275006
Con_Pmod_vs_Con_Scr	O00461|583	O00461	GOLIM4	S	583	ENEEQKQSNQKQENT	0.1879556575936121	10.591856857555127	3.6657463024285284	0.00397311	0.065404	-1.90879	10.465417976207846	10.446345968962504	10.513283551842283	10.658472195104952	10.701659958542423	10.628782316146086	10.656403533411067	10.576847515286282	10.464988453068718	10.589307586237457	10.658458218995817	10.742315016856097
Con_Pmod_vs_Con_Scr	O00461|640	O00461	GOLIM4	T	640	LEHNAEETYGENDEN	-0.0704553	18.49170062721602	-1.41821	0.18495887935753663	0.47068772074792437	-5.50666	18.645563159610564	18.687669222718547	18.635033166284153	18.533971633753985	18.635865629275784	18.587062524002217	18.32350002198389	18.34973101138638	18.481567150866816	18.397103020706595	18.369926035756777	18.253414950246516
Con_Pmod_vs_Con_Scr	O00461|641	O00461	GOLIM4	Y	641	EHNAEETYGENDENT	-0.0630802	18.660327738408903	-1.34339	0.20730083668972493	0.4965070973935714	-5.59989	18.78927201338799	18.8238	18.784024537748113	18.684467551854393	18.790551732851533	18.732814276205815	18.523164176949052	18.527366949925224	18.657613543877744	18.585046077614948	18.571452349014713	18.45438210923871
Con_Pmod_vs_Con_Scr	O00461|648	O00461	GOLIM4	T	648	YGENDENTDDKNNDG	-0.0470807	15.080516104232645	-1.13495	0.28149794724682337	0.571657	-5.84018	15.256791370305647	15.120532431410236	15.199242365784702	15.162878844093898	15.115513363877904	15.156931859456767	14.963698793308057	14.958940288429918	15.034064633073749	15.051551887115844	15.008898468155564	14.937148945779446
Con_Pmod_vs_Con_Scr	O00461|673	O00461	GOLIM4	Y	673	PKGREEHYEEEEEEE	-0.0235706	18.13827197824318	-0.870232	0.40352082727874306	0.6775823584886667	-6.09856	18.223437076932687	18.203811714247355	18.22445934039355	18.19028364700117	18.201754154340744	18.18895840677454	18.075686096981535	18.009502848250175	18.077464182654037	18.0888	18.11840461288552	18.056688128313315
Con_Pmod_vs_Con_Scr	O00470|222	O00470	MEIS1	S	222	RDHDDTASTRSGGTP	-0.0499681	12.134766588198602	-1.36571	0.20041151280982358	0.48859058130662397	-5.57244	12.085856356536624	12.066098119629874	12.064025939874403	12.088632622775211	11.927733936581182	12.049709535795204	12.343324490130229	12.322026739628782	12.324711337358286	12.106560845280868	12.11220365776268	12.12631547702988
Con_Pmod_vs_Con_Scr	O00472|191	O00472	ELL2	T	191	TPMNPANTIRKTHSS	0.00987878	15.0298	0.4732886368016242	0.6456391845930657	0.8392883841927009	-6.37096	15.020737249522512	15.01233038697642	15.020628897911124	15.037818240365382	15.016486410015322	15.029028230788196	14.984102865073716	14.965336977069622	14.967081811837415	15.094635365096488	15.104657614268914	15.104338854467692
Con_Pmod_vs_Con_Scr	O00472|305	O00472	ELL2	S	305	AGTSRSESPVCSSRD	0.0168007	13.495425338477025	0.26166647029396667	0.7986116270361345	0.9143567022720244	-6.453	13.56902168822732	13.679856524789338	13.539434932166078	13.686225123856548	13.480237547959666	13.672252701504974	13.26156171318531	13.432549801181423	13.344375949003735	13.442240864322091	13.361633878837962	13.47571333668985
Con_Pmod_vs_Con_Scr	O00472|315	O00472	ELL2	S	315	CSSRDAVSSPQKRLL	0.061836821128382624	14.083120334514994	1.1557680610188084	0.27325494708420767	0.5636764027991157	-5.81756	13.980169450504182	14.207114203598165	14.027066829301129	14.082855508571685	14.179416836031391	14.137588602185543	13.93706067801472	14.024548023166329	14.031786991797787	14.129908419418738	14.125299619835628	14.134628851754629
Con_Pmod_vs_Con_Scr	O00472|316	O00472	ELL2	S	316	SSRDAVSSPQKRLLD	-0.0229493	14.43319415476251	-0.579617	0.5743296002822458	0.7951265980840095	-6.31265	14.442719982907075	14.467538022090157	14.459450336649716	14.366422449941926	14.52395912755427	14.410478806178949	14.389160245422602	14.385419619422262	14.444721485481006	14.456358793196603	14.458740845617983	14.39336014268758
Con_Pmod_vs_Con_Scr	O00483|66	O00483	NDUFA4	S	66	NDQYKFYSVNVDYSK	-0.0755537	3.5206948856518756	-1.08437	0.30233361278863335	0.5914930619252943	-5.89382	3.308779391068036	3.302991836655739	3.390967620012752	3.2449692979724993	3.325453810747284	3.2056547678575633	3.899569755563336	3.670349785294462	3.6417073632673618	3.642262734612681	3.80391	3.8117216905537017
Con_Pmod_vs_Con_Scr	O00499|296	O00499	BIN1	S	296	APAKGNKSPSPPDGS	0.0842769	16.271426407148418	1.1765339744791783	0.26522061475187075	0.5557003356705864	-5.79467	16.34085441566661	16.09858828407209	16.25136364927961	16.3721	16.239918483272213	16.33166797989463	16.307892669381697	16.471534620284455	16.28060998420369	16.230762703477918	16.08969608784918	16.242177416784518
Con_Pmod_vs_Con_Scr	O00499|296;303	O00499	BIN1	S;S	296;303	APAKGNKSPSPPDGS;SPSPPDGSPAATPEI	0.0682387	15.39599295571641	2.1076465185602027	0.059842	0.27389523276365674	-4.51476	15.351956933742446	15.243836322163729	15.310936923884146	15.404106060304311	15.325564827133736	15.381775393662092	15.480507018841225	15.501059685795514	15.479530194734338	15.44424286523454	15.406179064535388	15.422220178565468
Con_Pmod_vs_Con_Scr	O00499|298	O00499	BIN1	S	298	AKGNKSPSPPDGSPA	0.0341876	13.249167191693346	0.9595262353712781	0.35874703416569453	0.6405330516687634	-6.01773	13.153408262826495	13.226252950271558	13.188717547247546	13.248337839685718	13.198265648866196	13.224338097934307	13.387635419436885	13.345116004294972	13.296287061644362	13.187287594522546	13.240515477779011	13.293844395810549
Con_Pmod_vs_Con_Scr	O00499|298;303	O00499	BIN1	S;S	298;303	AKGNKSPSPPDGSPA;SPSPPDGSPAATPEI	0.0607051	12.73244176353721	1.3047336730385035	0.21969907659690827	0.5095814111894551	-5.64668	12.68945770159294	12.66655643642937	12.714966222486352	12.782686785071904	12.731138382561362	12.739270368110857	12.870539785673476	12.82327016360935	12.7063	12.62523992903219	12.670072070795714	12.7698
Con_Pmod_vs_Con_Scr	O00499|303	O00499	BIN1	S	303	SPSPPDGSPAATPEI	0.026762724838025775	17.147615371953734	0.7826397226213349	0.451032	0.7139228872803974	-6.17119	17.15329335760921	17.03384903195094	17.12697084735535	17.15160828700862	17.11521006486171	17.12758305955925	17.19157416374363	17.20426182584837	17.137693336406883	17.178750153385128	17.151743342554692	17.198846993161002
Con_Pmod_vs_Con_Scr	O00499|331	O00499	BIN1	S	331	PGATLPKSPSQLRKG	-0.213998	24.649867816488477	-4.77749	6.428138637586927e-4	0.027545034965337823	-0.112479	24.921805803806336	24.88796707287932	24.961453932544405	24.705873501647183	24.744436200741347	24.67892460000791	24.53874650282726	24.384452070610532	24.39107315682701	24.46908229264361	24.56613990802772	24.54845875529911
Con_Pmod_vs_Con_Scr	O00505|56	O00505	KPNA3	S	56	RNVPQEESLEDSDVD	0.0240412	17.004810187540464	0.6669659099668805	0.5191006495481851	0.7633833081590958	-6.25652	17.06517471462269	16.96134857173725	17.01736893427447	17.073864233630253	16.98731905047272	17.054832429055477	17.011363957318718	17.078867667592732	17.02554767312276	16.955007155399283	16.89096176650317	16.936066096756043
Con_Pmod_vs_Con_Scr	O00505|60	O00505	KPNA3	S	60	QEESLEDSDVDADFK	-0.00887187	19.036374368140404	-0.435626	0.6718780227944747	0.8539797077292465	-6.38891	19.074425856962858	19.062952791305765	19.070014642564953	19.06582083238377	19.052975520406495	19.061981323667055	19.04425784326736	19.049368399390826	19.040473676326215	18.97217503892791	18.967118130654804	18.97492836182685
Con_Pmod_vs_Con_Scr	O00506|231	O00506	STK25	S	231	LFLIPKNSPPTLEGQ	0.0856802	14.374240709586084	1.3186621206996658	0.21516302159764608	0.5053651041083502	-5.62993	14.34569455182235	14.412342906898184	14.346198936055336	14.3421	14.583670775169995	14.435483754482858	14.180785864116173	14.329999806650582	14.36390287041088	14.456087525921648	14.370170655981427	14.324428390384387
Con_Pmod_vs_Con_Scr	O00512|104	O00512	BCL9	S	104	GKRERSISADSFDQR	0.157587	13.009354976891931	2.9696253571163136	0.013289114303673737	0.12265775553461142	-3.08862	12.92557568103972	12.778201974439096	12.93813686709765	13.038679461372666	13.074793429674685	13.001203594833123	13.023697889583085	12.87173470455202	12.85866925818058	13.15719056827766	13.228800029014945	13.215576264637944
Con_Pmod_vs_Con_Scr	O00512|115	O00512	BCL9	T	115	FDQRDPGTPNDDSDI	0.0646413	10.925906058421274	1.4822794620705921	0.16747982750845003	0.4481182127521552	-5.42412	10.986797136224196	10.835439436927862	10.954076745733875	10.957819837517349	11.044065174981178	10.9684	10.851014049818998	10.925550900335478	10.844174103020674	10.947860960524874	10.876332490570984	10.919389656044434
Con_Pmod_vs_Con_Scr	O00512|278	O00512	BCL9	S	278	PRPLDRESPGVENKL	0.10904733170328917	13.901347147026632	1.9931552960024879	0.0727164	0.2988345275254789	-4.69279	14.00880631130046	13.792642335063748	13.94522086692614	14.0988	13.936482785613892	14.038517842286415	13.789011299588882	13.762852256692478	13.721493443264103	13.917987034860412	13.88738428089464	13.916956427328518
Con_Pmod_vs_Con_Scr	O00512|315	O00512	BCL9	T	315	TPNNRAVTPVSQGSN	-0.0260445	13.697255630080559	-0.650784	0.529091	0.7695865448219156	-6.26747	13.753035701459371	13.64037509053737	13.725290497113736	13.72637733543516	13.62851172623346	13.6857	13.712873938513685	13.722667977144717	13.635534982805126	13.702504951121217	13.68103799960194	13.753178601865216
Con_Pmod_vs_Con_Scr	O00512|687	O00512	BCL9	S	687	IPVEGPLSPSRGDFP	0.00155423	16.139102708981216	0.0392613	0.9694144242632552	0.9883314522442982	-6.48868	16.247947721103923	16.10899801411733	16.23841417741644	16.199465116328156	16.22383586836713	16.17672161448512	16.020700911295368	15.976826514588684	15.923331635804558	16.171690959054832	16.177908713997137	16.203391261215913
Con_Pmod_vs_Con_Scr	O00512|917	O00512	BCL9	S	917	VLGSAAASPVHLKSP	0.0279933	12.317176072102415	0.6927380544762434	0.5034227935244016	0.7537637108123979	-6.23858	12.286471839929844	12.317226397693188	12.336735963340091	12.314511628065777	12.39864437909076	12.311258202629016	12.297329914588056	12.16795165568293	12.201045575816812	12.34270869034289	12.434851779053233	12.397376838996376
Con_Pmod_vs_Con_Scr	O00522:A0A8I5KWQ7|22:22	O00522:A0A8I5KWQ7	KRIT1:NA	S	22:22:00	IRPKNTASLNSREYR:IRPKNTASLNSREYR	-0.0929343	18.736699189125122	-3.79889	0.00316887	0.0584205	-1.68618	18.985705550209435	18.924195108392535	18.97869134921373	18.8613	18.889479355716265	18.859	18.56927099495853	18.561362323212627	18.546297806193703	18.55831961184893	18.552201267521983	18.554557071635234
Con_Pmod_vs_Con_Scr	O00559|36	O00559	EBAG9	S	36	SGRGRKLSGDQITLP	0.00413546	18.166817875509864	0.11948234783959281	0.9071357893388523	0.9639504443143496	-6.48188	18.181580799919978	18.041812184003607	18.144135562566227	18.1251	18.135499762683384	18.119301450382316	18.276151534497966	18.307890948061505	18.272266514306622	18.16053906036381	18.11169121287954	18.125811764107603
Con_Pmod_vs_Con_Scr	O00560|6	O00560	SDCBP	S	6	__MSLYPSLEDLKVD	0.00739018	13.591355529544579	0.11065224477152942	0.913967	0.9656898608022868	-6.48296	13.664740146071583	13.561444965491134	13.68773580701368	13.64084646500853	13.688002865469487	13.607242128539994	13.519613815195283	13.534167163485446	13.308378657783091	13.568412288547464	13.572098971989591	13.743583079939665
Con_Pmod_vs_Con_Scr	O00562|300	O00562	PITPNM1	S	300	APPGPDASPDASFGK	-0.0436281	17.29932506254753	-1.05466	0.31511134068467844	0.6033941539142801	-5.92442	17.386512887442787	17.268560632845226	17.36920931898007	17.347996060924938	17.24761717395439	17.297785199942524	17.33668844367837	17.27526406610372	17.227740198988286	17.25294052009301	17.272249970843543	17.309336276773507
Con_Pmod_vs_Con_Scr	O00562|593	O00562	PITPNM1	S	593	RGSSRRGSMNNELLS	-0.00413702	19.917114560771413	-0.174987	0.8643997143078581	0.9439126147795097	-6.47315	20.161523898113906	20.100723317169617	20.14584308911967	20.14497342351103	20.11831348123336	20.13239233675713	19.751820897892664	19.74068248868152	19.736115169646247	19.66212801450251	19.655381429401043	19.65547718322825
Con_Pmod_vs_Con_Scr	O00562|621	O00562	PITPNM1	S	621	VEGLGRGSPEPSALP	-0.00473602	16.99159519105274	-0.157181	0.8780672669265763	0.9498842749902318	-6.47631	17.19423294619136	17.1863	17.207802863378774	17.20758790033733	17.18079458133592	17.18570764869577	16.78529728820747	16.768849845551166	16.700495083338453	16.79449158470363	16.814432524243134	16.873187632681738
Con_Pmod_vs_Con_Scr	O00567|314	O00567	NOP56	S	314	RLIAHAGSLTNLAKY	-0.187646	7.222675397796944	-1.33276	0.21065171509244815	0.500559	-5.61286	7.227434896584333	6.944834799912716	7.23809	6.86928	7.110157592828184	6.867975018016326	7.488516252140608	7.011074716668817	7.411978345194001	7.503684451652516	7.7019434114778385	7.297134060056834
Con_Pmod_vs_Con_Scr	O00567|520	O00567	NOP56	S	520	SKEELMSSDLEETAG	-0.0207281	18.764976445029408	-0.633361	0.539972	0.7761369310786201	-6.27898	18.79601502470073	18.80134332024028	18.80313275528287	18.773779334383367	18.78851373726987	18.776013783542545	18.783078971752104	18.69349488132354	18.79794285837192	18.721866617623792	18.76744876977151	18.677087286090384
Con_Pmod_vs_Con_Scr	O00567|570	O00567	NOP56	S	570	SKEEPVSSGPEEAVG	-0.0455248	15.830265554752343	-0.849055	0.41468314492492175	0.6866482186480098	-6.11674	15.956792902067338	15.743942884222834	15.899506831032696	15.89020333357676	15.742889385297993	15.83057558100569	15.899606704545755	15.86748330838057	15.81856546802952	15.775876849629396	15.751726245815602	15.786017163423946
Con_Pmod_vs_Con_Scr	O00571:O15523|594:592	O00571:O15523	DDX3X:DDX3Y	S	594:592	RSKSSRFSGGFGARD:RSKSNRFSGGFGARD	0.11564888382064797	7.7662246084240785	1.5129729484052292	0.15962241190954224	0.4385648687437692	-5.38375	7.518025751870669	7.710510434328575	7.5292394791856365	7.67307	7.708127317097321	7.723524454197676	7.8521345811547745	8.146169383441446	7.957329462566415	7.813739909687001	7.69076	7.872065071181542
Con_Pmod_vs_Con_Scr	O00571:O15523|71:71	O00571:O15523	DDX3X:DDX3Y	S	71:71	KDKDAYSSFGSRSDS:KDKDAYSSFGSRDSR	0.2159082552114029	15.879305569569475	3.9060982083888978	0.00264502	0.0544742	-1.50813	15.90823567881178	16.011575853513893	15.921853381120425	16.174258033014215	16.138023608462042	16.17710803760403	15.729904945049194	15.893754505117313	15.713228148490805	15.610215066566331	15.5518	15.721678820464868
Con_Pmod_vs_Con_Scr	O00571:O15523|74:74	O00571:O15523	DDX3X:DDX3Y	S	74:74	DAYSSFGSRSDSRGK:DAYSSFGSRDSRGKP	0.3089702765574813	19.762022302343777	3.9618302595341643	0.00240915	0.0520491	-1.41604	19.914494474154232	19.91060066753723	19.829563883341123	20.23258189895615	20.09714378602741	20.251844169721473	19.49683432110925	19.81310881778839	19.68892405033652	19.393732098022333	19.19420892404042	19.321230537090777
Con_Pmod_vs_Con_Scr	O00571|102	O00571	DDX3X	S	102	RFDDRGRSDYDGIGS	0.29444362243823363	22.739551476542808	2.9692780419914246	0.0132972	0.12265775553461142	-3.08921	22.793750975377677	23.01945060533903	22.75164034865996	23.197076864097777	23.01955209938339	23.231543833210196	22.468890593215026	22.821101164482396	22.70716012510994	22.353106437080847	22.181066690909947	22.330277981647512
Con_Pmod_vs_Con_Scr	O00571|594	O00571	DDX3X	S	594	RSKSSRFSGGFGARD	0.00967184	14.181981292939241	0.3275185504867203	0.7496762833776257	0.8895720902278301	-6.43242	13.883355229226874	13.97939904115145	13.90810457353562	13.946755445425936	13.911177809678843	13.941941100628911	14.482641521725816	14.48220074608668	14.46393002246614	14.367932751433122	14.393280115550205	14.423057158361305
Con_Pmod_vs_Con_Scr	O00571|606	O00571	DDX3X	S	606	ARDYRQSSGASSSSF	0.33507099274152097	17.988426620386328	6.066016492274499	9.638139197742321e-5	0.010514333670264352	1.7457356671342241	17.971751495699674	17.879756285591302	17.891854050146442	18.327787054651317	18.12154606547839	18.299241689532273	17.92329714739433	18.036896415731505	18.008738697199465	17.852896777225574	17.753284643510284	17.794069122475378
Con_Pmod_vs_Con_Scr	O00571|609	O00571	DDX3X	S	609	YRQSSGASSSSFSSS	0.3682309776023409	17.62843215540918	4.291632601633351	0.0013971	0.0400907	-0.878389	17.573217016905335	17.599628200115422	17.526062177859583	18.041790878032163	17.7668	17.995	17.54265987290874	17.772401045133996	17.536894104005885	17.395306197336936	17.277111782554492	17.514305140402385
Con_Pmod_vs_Con_Scr	O00571|612	O00571	DDX3X	S	612	SSGASSSSFSSSRAS	0.42484279796564905	21.105213913500204	6.96807	2.9215997228678392e-5	0.00681824	2.8941705283176367	21.236809494244596	21.23672506347538	21.165296955417546	21.660756481956636	21.56718381674434	21.685419608333483	20.866199567720003	21.088687755786324	21.060774596017687	20.651216224099667	20.501757450977756	20.541739947229026
Con_Pmod_vs_Con_Scr	O00571|82	O00571	DDX3X	S	82	RSDSRGKSSFFSDRG	0.24564856084275632	26.069908718154643	1.0709113359446356	0.3080738792552596	0.5960098499442219	-5.90777	26.323748148906013	26.901297411137055	26.328774111720342	26.567631581816215	26.90598767011615	26.817146102359303	25.336323600496403	26.266841744872437	25.918832809896184	25.33381175999223	24.901355681270054	25.23715399527334
Con_Pmod_vs_Con_Scr	O00571|90	O00571	DDX3X	S	90	SFFSDRGSGSRGRFD	0.10829058722978857	16.893025165211327	2.0118618611381596	0.0704483	0.29596376662676516	-4.66398	16.776514108608627	16.780828535578536	16.730373101388118	16.927243072060556	16.76898259016759	16.916361845036498	17.026953523435832	17.001662569137103	17.155207114289347	16.92088897194379	16.91024987065552	16.801036680234414
Con_Pmod_vs_Con_Scr	O00629|60	O00629	KPNA4	S	60	HEDICEDSDIDGDYR	0.0691176	18.284870648155188	1.0958309579895997	0.29751385844238787	0.5865847952664102	-5.88184	18.281282634976453	18.2458	18.271746637503565	18.440318876148872	18.203784124112623	18.36211359528151	18.31130625864011	18.297176834277515	18.16431316183225	18.22372662507596	18.24126356466372	18.37558098644539
Con_Pmod_vs_Con_Scr	O00712|328	O00712	NFIB	S	328	KPLFSSASPQDSSPR	0.0665768	13.957506557150731	1.6234155831824069	0.13394269819179064	0.4056076201265511	-5.23426	14.41547689352544	14.457913194780849	14.446572551294825	14.46549509861554	14.570267507784193	14.483930399638794	13.401497174365128	13.47411949148275	13.350556474571729	13.453600618913148	13.436894474042594	13.533754806793796
Con_Pmod_vs_Con_Scr	O14495|19	O14495	PLPP3	S	19	PESKNGGSPALNNNP	-0.199105	8.408109642481758	-2.27777	0.0446421	0.2342110815493752	-4.24339	8.41538	8.682095550874859	8.473538742671394	8.423477030560969	8.17911	8.371117976853643	8.53582	8.572181247040607	8.426065212721923	8.174753075563494	8.231780065360713	8.412001584083576
Con_Pmod_vs_Con_Scr	O14497|1184	O14497	ARID1A	S	1184	PGMSRSNSVGIQDAF	0.013807079140160994	14.810476720201512	0.3981115415684445	0.6984777963927431	0.8668584911982145	-6.40537	14.772320457657017	14.731738849945124	14.787949889461812	14.79330306971242	14.775914439934256	14.764212924837755	14.909142965467648	14.857828587596488	14.792544853640775	14.80624097833185	14.841927009356883	14.892596616476125
Con_Pmod_vs_Con_Scr	O14497|363	O14497	ARID1A	S	363	RSHHAPMSPGSSGGG	-0.0269749	13.354474701546703	-1.12983	0.28355885625007826	0.5737173584316143	-5.84571	13.318980869591716	13.3316	13.33756687403407	13.293137872749348	13.322875956472098	13.291225189688658	13.382290980147165	13.364030157191396	13.33681003904692	13.404618753428812	13.425258086429343	13.445285564857508
Con_Pmod_vs_Con_Scr	O14497|696	O14497	ARID1A	S	696	LPGIRGPSPSPVGSP	-0.0325283	14.912405923040078	-1.34403	0.20709986862972066	0.4963918571356233	-5.59911	14.944630018626547	14.98140174017686	14.961769616770908	14.924938147053478	14.939688780862127	14.925589553450202	14.86432863974536	14.87732600069137	14.834895755193212	14.880676327481806	14.887881139480392	14.925745356948662
Con_Pmod_vs_Con_Scr	O14497|698	O14497	ARID1A	S	698	GIRGPSPSPVGSPAS	-0.0989571	13.471545473193647	-2.76539	0.0190244	0.14841723566462411	-3.43474	13.489179268444335	13.5277	13.522571001360411	13.440594049819264	13.39221076616316	13.409764633479783	13.531259259033517	13.451695170927078	13.420374469834409	13.434770711371552	13.502266717570038	13.536169103235403
Con_Pmod_vs_Con_Scr	O14497|702	O14497	ARID1A	S	702	PSPSPVGSPASVAQS	0.0342432	12.927761002420949	0.8346450270817426	0.4223970705677713	0.6924256084938375	-6.12888	12.85471636549848	12.964093139982758	12.900200559684167	12.88813176636236	13.013185368817927	12.92042264546818	12.93243402913161	12.991987538563333	12.915443351240633	12.89616035142379	12.897056876577906	12.959300036300242
Con_Pmod_vs_Con_Scr	O14497|772	O14497	ARID1A	S	772	PQPGSALSPRQPSGG	-0.00563862	16.34916249807088	-0.164469	0.8724673452674155	0.9470862629547603	-6.47506	16.404415689313485	16.356209051656705	16.40548399102726	16.392882087651024	16.382054590053198	16.37425620605898	16.33063209008247	16.356120858003877	16.249410163353993	16.29204999558775	16.28046524161158	16.366
Con_Pmod_vs_Con_Scr	O14513|763;765	O14513	NCKAP5	T;T	763;765	TESFSSRTVTQNPQQ;SFSSRTVTQNPQQQK	-0.0571715	14.04411377275727	-1.68299	0.12166615720462566	0.38745314236454975	-5.15104	14.002035953394095	14.103616669765202	14.032665528403008	14.013063026501053	13.95558545061576	13.99815531092881	14.139712538561332	14.124795520849473	14.09146574729186	13.982041052468272	14.02055276613926	14.065675708169104
Con_Pmod_vs_Con_Scr	O14523|59	O14523	C2CD2L	S	59	LAGEPAGSLRELGVW	-0.0403745	16.40544849657434	-0.783114	0.4507651604157018	0.7138756848111463	-6.17081	16.589677417982816	16.435718681595226	16.55424350955101	16.49681187884595	16.485014719367797	16.476689472848566	16.271186532061673	16.37024078946403	16.201853753264796	16.336758415510133	16.259898850110105	16.38728793828999
Con_Pmod_vs_Con_Scr	O14523|613	O14523	C2CD2L	S	613	SDISERPSVDDIESE	-0.0187173	12.366342234718998	-0.278219	0.7862161460704997	0.9099095610924702	-6.44825	12.473725842682432	12.427117093437246	12.422633086879117	12.53029773568984	12.265442055196356	12.471584258998126	12.28176868458707	12.40146185355876	12.249153729114228	12.28823004429805	12.214312221614737	12.370380210572012
Con_Pmod_vs_Con_Scr	O14523|662	O14523	C2CD2L	S	662	KEAGLSQSHDDLSNA	0.014328223267732199	14.867140510894242	0.3732906754170682	0.7163165774058017	0.8752928668043325	-6.41546	14.980815184708064	14.94821766815614	14.97833817283468	15.031536665136866	14.92787343562782	14.990945594737404	14.778003713289696	14.774138096171376	14.683504082289534	14.737849134059497	14.745211217218571	14.829253166501244
Con_Pmod_vs_Con_Scr	O14545|327	O14545	TRAFD1	S	327	SLNTGSSSPRGVEEP	-0.0867937	19.434681851498034	-4.132	0.00181559	0.046177	-1.13699	19.543687989035885	19.540900424139693	19.548293273396524	19.449766049042832	19.470484089029828	19.452250472655464	19.378768316267617	19.358663773131298	19.374285593175976	19.36446743034415	19.37543922264003	19.359175585117125
Con_Pmod_vs_Con_Scr	O14545|414	O14545	TRAFD1	T	414	LDSQPQETSPELPRR	-0.0734345	18.381319424175715	-2.40726	0.035642	0.2092858182887853	-4.03233	18.47499450525316	18.498361701633687	18.46207455304679	18.38836142616589	18.413597175514287	18.41316875972895	18.28086035047688	18.3164	18.37400710142445	18.352213141009564	18.32464363593018	18.277160035374138
Con_Pmod_vs_Con_Scr	O14545|415	O14545	TRAFD1	S	415	DSQPQETSPELPRRR	-0.104628	20.01329717391715	-4.28886	0.00140343	0.0400981	-0.882852	20.112668326874925	20.120123202995018	20.11005686957906	19.98720377962557	20.03518858837058	20.00657120034298	19.96542507646547	19.9854	20.010722143023923	19.960478562457062	19.9456	19.9202
Con_Pmod_vs_Con_Scr	O14558|16	O14558	HSPB6	S	16	PSWLRRASAPLPGLS	-0.0754863	19.103674950272346	-0.886436	0.3951203794729947	0.6696955584288046	-6.08439	19.05407334203539	19.273440577650284	19.076254308314585	18.939963876711406	19.18133805164093	19.056007436784597	19.065478411410837	19.337292514020067	19.293804221191326	19.05638081246504	18.93587554920225	18.97419030184145
Con_Pmod_vs_Con_Scr	O14576|635	O14576	DYNC1I1	S	635	IRANRADSEEEGTVE	-0.173657	12.321274460589207	-1.84953	0.0925374	0.3367142011006314	-4.90979	12.314696139813782	12.560943055567831	12.44822844321327	12.10107470980256	12.51037429105902	12.19144740394916	12.237447299645533	12.259542015274778	12.175931477374943	12.291198293237176	12.35803426337054	12.406376134761883
Con_Pmod_vs_Con_Scr	O14578|440	O14578	CIT	S	440	SVVSGLDSPAKTSSM	-0.0845823	7.956916034246623	-1.3079	0.21865944015902292	0.5088105983328522	-5.64288	7.630219995004357	7.935716680767157	7.710645241346415	7.689563214826764	7.63933	7.69395	8.395704375933253	8.356724527836363	8.382203818231583	7.948064328726992	8.042058682052824	8.058819669637082
Con_Pmod_vs_Con_Scr	O14578|480	O14578	CIT	S	480	TRLHRRVSEVEAVLS	-0.137051	8.951149177526803	-2.67998	0.022104918545514416	0.161029	-3.57863	8.558796721458556	8.732270852136923	8.629017864957737	8.519459072910095	8.48826	8.501210333076603	9.44702	9.397001459455616	9.332765355951054	9.187604556980226	9.272888891773372	9.34749
Con_Pmod_vs_Con_Scr	O14579|45	O14579	COPE	S	45	AQRVKLSSPERDVER	-0.00282496	12.697658287950599	-0.0876064	0.9318285868022185	0.97335	-6.48541	12.596286361100557	12.49331212328998	12.586822120218931	12.562052905186825	12.564033322771316	12.541859484561163	12.823329168777132	12.797697803631596	12.749568642776504	12.87568497431874	12.876615310939586	12.904637237834852
Con_Pmod_vs_Con_Scr	O14579|99	O14579	COPE	S	99	AHESRRDSIVAELDR	0.00854594	16.447817692820383	0.21994647475900156	0.8301065205480859	0.9290661413629586	-6.46369	16.51113958121578	16.443306544241928	16.45704374028447	16.528341164804896	16.398124144897576	16.510662374914652	16.450573468328805	16.518879659165243	16.51065146411551	16.385776675519875	16.321324820868288	16.337988675487576
Con_Pmod_vs_Con_Scr	O14613|109	O14613	CDC42EP2	S	109	PLLKNAISLPVIGGP	0.0748654	22.567420996908474	1.293208868027923	0.22351156735929595	0.5139091951128212	-5.66044	22.78474930223657	22.75313702337407	22.718284087500727	22.87345864506108	22.736192218488103	22.87111572660161	22.238827662531236	22.448547243655874	22.34686960076027	22.4031	22.26598089408121	22.36876605903572
Con_Pmod_vs_Con_Scr	O14613|141	O14613	CDC42EP2	S	141	HLETPQPSPQEGGSV	0.00464561	13.815690181614194	0.10707150659081711	0.9167391676739144	0.9671854137933193	-6.48338	13.69308648749482	13.832344542926148	13.762159501345838	13.717892884391809	13.842491983421745	13.741142495878892	13.790372422768549	13.742343246961823	13.738480033229266	13.928904028387317	13.99838247569815	14.000682076865978
Con_Pmod_vs_Con_Scr	O14617|658	O14617	AP3D1	S	658	RRPKHRPSEADEEEL	-0.272831	18.127329550967858	-2.80739	0.017670571961837488	0.1438049012923889	-3.36376	18.01113952296934	18.39651143598649	18.113974123643366	17.763739881072134	18.060018269809557	17.87937329029969	18.3019	18.48327799913755	18.42778224437609	18.02159726060005	18.005600899643767	18.06303633974524
Con_Pmod_vs_Con_Scr	O14617|685	O14617	AP3D1	S	685	NNPFYIKSSPSPQKR	-0.0148427	20.959766656891194	-0.268096	0.7937894449699985	0.9125638676054382	-6.45119	21.098543032480052	20.866652990143944	21.03403992347578	21.0289	20.936894447803184	20.988940749738383	21.015742108700735	20.92582897312972	21.001014221750417	20.905475985758404	20.89711901216146	20.81807586075447
Con_Pmod_vs_Con_Scr	O14617|688	O14617	AP3D1	S	688	FYIKSSPSPQKRYQD	-0.017864	14.251128246542775	-0.428018	0.6772358448590485	0.8567887027214728	-6.39236	14.127798862524614	14.302652076837818	14.177777255149534	14.19646385286518	14.163824136428406	14.194348216063348	14.354153069740658	14.335605946165192	14.32411819858482	14.23136886668376	14.286794324800988	14.318634152668988
Con_Pmod_vs_Con_Scr	O14617|829	O14617	AP3D1	S	829	RNTETSKSPEKDVPM	-0.088456	18.283627481370885	-1.90059	0.0849782	0.32266066786023506	-4.83352	18.2984	18.359263798994775	18.298649299923618	18.19667958944937	18.259581807891724	18.234643943866725	18.346488242289073	18.318816722291007	18.4715	18.242880480183732	18.252626927091978	18.124
Con_Pmod_vs_Con_Scr	O14618|267	O14618	CCS	S	267	AGKGRKESAQPPAHL	-0.0688003	16.53551205614199	-1.33836	0.20887977387111872	0.4982314808635286	-5.60603	16.43416669197939	16.554449121022685	16.4857	16.33451531934506	16.542276279798255	16.391102889383156	16.698136892843443	16.78057739767275	16.711670973925365	16.489536439544413	16.478079728399685	16.525953386849586
Con_Pmod_vs_Con_Scr	O14639|422	O14639	ABLIM1	S	422	DDKQERQSLGESPRT	-0.0679158	13.730854597872225	-0.636116	0.5382423346059935	0.7748717217580012	-6.27718	13.397324933165445	13.79385316545987	13.50839093835093	13.340555455424212	13.6873	13.467949175341207	13.863503592220685	14.085064680637291	13.982969666297146	13.871572248530462	13.839641608135798	13.93211280970926
Con_Pmod_vs_Con_Scr	O14639|426	O14639	ABLIM1	S	426	ERQSLGESPRTLSPT	0.0348122	13.535128405095037	1.090136096066195	0.29990239181289075	0.5894780745777674	-5.88781	13.524821004754196	13.593813785403125	13.56074621779711	13.55857079470852	13.647253202354026	13.57799352724381	13.512015672410469	13.45883588647698	13.506203848405772	13.477028162149551	13.524030714320206	13.480228045116675
Con_Pmod_vs_Con_Scr	O14639|431	O14639	ABLIM1	S	431	GESPRTLSPTPSAEG	0.0891722	17.46916058144236	2.6319708051651007	0.024049426269848278	0.169398	-3.65921	17.3392	17.31811738930778	17.334798013519215	17.37819873797006	17.47428697006701	17.407097382201346	17.47323715017846	17.462836416874584	17.53299305856791	17.665298509257358	17.65809195764596	17.58582044558283
Con_Pmod_vs_Con_Scr	O14639|452	O14639	ABLIM1	S	452	RMIHRSTSQGSINSP	0.0910772	17.776432629269905	1.7324613349626046	0.11224885124312321	0.3704212091023066	-5.08065	17.65326814153987	17.460213679548758	17.601935555373473	17.615569477851764	17.73261152144197	17.64046784430976	17.930987829309657	17.969748810414604	17.991815166897606	17.97310119888303	17.899771589117893	17.847700736550472
Con_Pmod_vs_Con_Scr	O14639|540	O14639	ABLIM1	S	540	ALAAQSKSSEDIIKF	-0.0445576	22.9697	-0.670763	0.5167726767678356	0.7619000857204585	-6.25392	22.98738620776515	22.67999815969377	22.889147590991698	22.835508180798293	22.776197770407443	22.81115313810541	23.115988315725307	23.103429915008793	23.158273500923293	23.167149567236308	23.0921	23.01996478683385
Con_Pmod_vs_Con_Scr	O14639|586	O14639	ABLIM1	S	586	GPDMKRRSSGREEDD	-0.0408345	16.82003196290198	-0.836933	0.42116560758727717	0.6915519368269758	-6.12696	16.606211684542433	16.64504459703922	16.64307339293102	16.500108324931468	16.719768681278296	16.55194922714997	17.07848103388792	17.050065659237532	17.10621571798689	16.98654610671107	17.011070845798734	16.941848283329193
Con_Pmod_vs_Con_Scr	O14639|587	O14639	ABLIM1	S	587	PDMKRRSSGREEDDE	-0.0170873	18.29016940901297	-0.293221	0.775035	0.9036645849614515	-6.4437	18.026058638537673	18.071045398479555	18.05554701731546	17.92934947177356	18.174747014924776	17.997292646458636	18.586547015687888	18.563020304851488	18.671284186484165	18.49753451537401	18.51221999384314	18.39738670442529
Con_Pmod_vs_Con_Scr	O14639|706	O14639	ABLIM1	S	706	MRMDRGVSMPNMLEP	-0.0873067	25.90325438160499	-1.61803	0.13510539807850475	0.4066334140734455	-5.2417	26.04073694461068	25.854023571131385	25.966637518432556	25.839726111653583	25.89595181723314	25.863799929056377	25.864033411996807	25.995715876678396	25.96686282799048	25.935859996559735	25.80757627158144	25.808128302335337
Con_Pmod_vs_Con_Scr	O14640:P54792:O14641|51:51:59	O14640:P54792:O14641	DVL1:DVL1P1:DVL2	S	2 days, 3:51:59	AYKFFFKSMDQDFGV:AYKFFFKSMDQDFGV:GAKYFFKSMDQDFGV	0.010795504436568848	16.23686860272569	0.1866976433729008	0.855436	0.9405224662642393	-6.47089	16.204105167921288	16.0614	16.130580547293057	16.13181856631885	16.141544811148524	16.155113615828377	16.29628317270925	16.323634047451293	16.458651290385923	16.405576297750617	16.330957259476445	16.20275369165294
Con_Pmod_vs_Con_Scr	O14640|625	O14640	DVL1	S	625	ERPAGQLSRGSSPRS	-0.0372844	18.562068036417113	-1.23073	0.24513271196993586	0.5364739484769386	-5.7335	18.487374365774777	18.492619553402715	18.46562757469957	18.44059177827697	18.436480045786332	18.45669644591476	18.695843525228163	18.799137547149066	18.764540965474584	18.60024499414993	18.536587529313355	18.569072111835137
Con_Pmod_vs_Con_Scr	O14646|1677	O14646	CHD1	S	1677	ASSSGPRSPLDQRSP	0.0331499	14.042494301137602	1.4491266522869448	0.17633858243072772	0.4590158327914821	-5.46713	14.083806369838957	14.044510135641383	14.066706583763064	14.09406996066436	14.101295707868896	14.099107158326689	13.988182414229463	14.006243736586368	14.01734210549101	14.023073855990882	13.999732892252291	13.985860692997855
Con_Pmod_vs_Con_Scr	O14646|1689	O14646	CHD1	S	1689	RSPYGSRSPFEHSVE	0.0703721	9.555523635554161	1.6308257092722271	0.13235805696698497	0.4040726891302706	-5.22401	9.603098567111198	9.764730051585625	9.618736902174366	9.716857769811869	9.72886	9.751964530282391	9.373023763316832	9.451822142269616	9.481093095240183	9.407342113480324	9.387519265836882	9.381236049679952
Con_Pmod_vs_Con_Scr	O14646|1694	O14646	CHD1	S	1694	SRSPFEHSVEHKSTP	-0.177523	14.834012199394543	-4.67331	7.571487843931256e-4	0.030285951375725022	-0.273879	14.567115515760134	14.58202580598941	14.608795459496264	14.361091258472005	14.490245577892043	14.374031040636275	15.19469899270054	15.112455805240447	15.130967008338278	15.166199526715546	15.225845466327382	15.1947
Con_Pmod_vs_Con_Scr	O14646|89	O14646	CHD1	S	89	DGAEFWKSSPSILAV	0.019450231197412293	13.246142669327018	0.4042966545946068	0.6940616134373927	0.8643031412616587	-6.40275	13.355326910156176	13.160729288008314	13.29165515917229	13.34067203784184	13.224950368235818	13.300439644851355	13.25691910990126	13.286996688755734	13.226646042025129	13.195008411586162	13.13536716449364	13.179001206896489
Con_Pmod_vs_Con_Scr	O14647|1364;1365;1369;1373	O14647	CHD2	S;S;S;S	1364;1365;1369;1373	EEHGIELSSPRHSDN;EHGIELSSPRHSDNP;ELSSPRHSDNPSEEG;PRHSDNPSEEGEVKD	0.00469786	16.080041007528894	0.0909645	0.9292232030970309	0.9717995670376988	-6.48508	16.03756566265426	16.09043707876915	16.090926572366733	16.06430637804616	16.11358279897018	16.05513371868347	15.985954845833248	15.779434692195537	15.907883352557125	16.226799090034085	16.36037062854235	16.248097271694427
Con_Pmod_vs_Con_Scr	O14647|1365	O14647	CHD2	S	1365	EHGIELSSPRHSDNP	0.0580631	13.169950721939044	0.9934827243230083	0.34269294867683087	0.6266168337074619	-5.98526	13.13773057829821	13.18986697770267	13.191723739345376	13.114670746772022	13.401769182099825	13.177070717460184	13.096611129338184	13.102127194363836	13.092144384439852	13.173869552273626	13.19084647549526	13.170977985679476
Con_Pmod_vs_Con_Scr	O14647|1728	O14647	CHD2	S	1728	HDSKRRRSDEFRPQN	-0.0915136	10.64575669819415	-1.89444	0.0858575	0.3242201052177412	-4.84276	10.540932617630238	10.54365884166632	10.52312280943582	10.505815514881132	10.356163662883146	10.471194142918668	10.822585079584696	10.913229402574787	10.780460222381006	10.748962797055125	10.706089526384934	10.836865760933923
Con_Pmod_vs_Con_Scr	O14647|1795	O14647	CHD2	S	1795	RSPPSQKSPHDSKSP	-0.0420844	14.478447062761905	-0.922705	0.37676071820536927	0.6550836388053871	-6.05187	14.519883203295716	14.501117409986678	14.529702979254392	14.39584419323534	14.585006772089857	14.44359931372986	14.354930142607776	14.34588629840455	14.410716980597222	14.58078130021257	14.57623150748023	14.497664652248671
Con_Pmod_vs_Con_Scr	O14654|893;896;899	O14654	IRS4	S;T;Y	893;896;899	AKRPNRLSFITKGYK;PNRLSFITKGYKIKP;LSFITKGYKIKPKPQ	0.032226717842693375	18.22183587761281	0.6976935478195369	0.5004413847694953	0.7518464475138772	-6.23506	18.19217195572745	18.103578203769477	18.20464669767083	18.223729033193894	18.19179988819555	18.181548089306393	18.235356946276553	18.06023871540361	18.108490266415643	18.343804131460686	18.433549623990064	18.383116979943576
Con_Pmod_vs_Con_Scr	O14662:H3BU86|41:41	O14662:H3BU86	STX16:STX16-NPEPL1	S	1 day, 17:41:00	SSPLHSRSIAAELDE:SSPLHSRSIAAELDE	0.15609805190187487	19.844620226356767	2.1444359811134173	0.0561855	0.2641705944610854	-4.45672	19.980088215578643	19.883017897898828	19.89844404265203	20.203597468180167	19.88694439483304	20.139302448821923	19.76532701898764	19.88414343268579	19.779593463534045	19.595596107702413	19.50120258361588	19.6182
Con_Pmod_vs_Con_Scr	O14668|158	O14668	PRRG1	S	158	YVVGRSDSVSTRLSN	-0.0234046	14.272799284534639	-0.331795	0.746535	0.8882427049850244	-6.43093	14.356311008861937	14.678160174002656	14.470573057010656	14.417020668301648	14.558233792217155	14.459576000132785	14.06848782688686	14.033782835075147	14.039	13.99135490715972	14.0941	14.107005951106796
Con_Pmod_vs_Con_Scr	O14668|160	O14668	PRRG1	S	160	VGRSDSVSTRLSNCD	0.027586073947592382	16.40318400028235	0.32203285929364045	0.7537123283046601	0.891887	-6.43431	16.60787991642406	16.860862328337383	16.689285709665924	16.74922770899599	16.743223390327092	16.748335076947047	16.07950728547291	16.220937935639448	15.959939396740378	15.972405451666608	15.978890410985093	16.22771339218628
Con_Pmod_vs_Con_Scr	O14681|46	O14681	EI24	S	46	EQRRRRASSVLAQRR	-0.0335305	20.920841265846626	-0.292059	0.7758989490145212	0.904093	-6.44407	21.075010444172115	21.31408103010444	21.039690740379644	21.04113766909839	21.129885819319277	21.157167272636222	20.80618509403043	21.279315028677697	21.15774614015858	20.469706613360714	20.22577732540293	20.354392012819076
Con_Pmod_vs_Con_Scr	O14681|56	O14681	EI24	S	56	LAQRRAQSIERKQES	0.047545669881554176	20.144676982150663	0.6001844301772095	0.5610413307032083	0.7884324034155593	-6.30009	20.267684298940495	20.295968886024756	20.221179493996527	20.23890855241667	20.36444313233451	20.324118003855254	20.09759670742968	20.19823783073335	20.39532942867405	19.896234514336538	19.804803606466287	19.631619330599847
Con_Pmod_vs_Con_Scr	O14683|14	O14683	TP53I11	S	14	PPLMKKHSQTDLVSR	0.035049	10.594015531180673	0.23438539445321507	0.8191677613048719	0.9247722488056644	-6.4602	10.652955871418856	11.293805843225694	10.831658535430648	10.771291338934937	11.176965731340278	10.93531003386138	10.114391679351089	10.121047855363075	10.337060420808836	10.269319492053748	10.39131842272861	10.23306114965093
Con_Pmod_vs_Con_Scr	O14686|1180	O14686	KMT2D	S	1180	KQTAGQGSPCEEQEE	0.1061481440557781	10.003920562711487	1.2073131498890024	0.25365694199206756	0.5441288026565302	-5.76018	10.026029788228984	9.810636319687989	9.945840035056412	10.205352861593502	9.810634353698047	10.084963359849162	10.18061505349811	10.112640663933464	10.056913151462409	9.91842	9.913491045622656	9.981509896412472
Con_Pmod_vs_Con_Scr	O14686|1671	O14686	KMT2D	S	1671	IKLEGPVSPDVEPGK	-0.0536329	15.817617838635824	-2.436	0.0338984	0.2039839780842473	-3.98505	15.848404629254926	15.857812645916855	15.860342360711982	15.805770600116436	15.802002325280045	15.79788804179342	15.79838923043901	15.769492925217076	15.762187590054973	15.818724434640009	15.84179984553912	15.848599434666044
Con_Pmod_vs_Con_Scr	O14686|1834	O14686	KMT2D	S	1834	PDIADEESRGLEGKA	-0.209919	12.593986621718429	-2.00319	0.0714911	0.29669197313820417	-4.67735	12.488943661767593	12.977041653367676	12.65655398376813	12.391368765126472	12.632796320832256	12.46861702425304	12.574783371356236	12.56108568462314	12.56020494418127	12.50972115745642	12.641068836755068	12.665654057133834
Con_Pmod_vs_Con_Scr	O14686|1843	O14686	KMT2D	T	1843	GLEGKADTPGPEDGG	0.0410593	12.064525843409841	0.697612	0.5004905101745787	0.7518464475138772	-6.23512	12.028611271586428	12.088682551881163	12.014168011571076	12.174307420276552	11.950889762977006	12.12944244102435	11.970527367977722	12.057138622152369	11.93810253899231	12.11638420106365	12.085943962604013	12.220111968811464
Con_Pmod_vs_Con_Scr	O14686|2240	O14686	KMT2D	T	2240	TPRHQPSTPDPFLKP	-0.254964	18.655592359260332	-4.0516	0.00207425	0.048712750508178006	-1.26841	18.82300339235993	18.88863603995777	18.87533843515689	18.489101421498138	18.777643054714183	18.55534146131001	18.491024389441176	18.583676262740177	18.480941366247126	18.629858910849322	18.605861298958924	18.666682277890356
Con_Pmod_vs_Con_Scr	O14686|2274	O14686	KMT2D	S	2274	KASEPLLSPPPFGES	-0.0101861	14.635873031273274	-0.413331	0.687633	0.8617191512944758	-6.39886	14.63776695726832	14.683872820714186	14.65780285887691	14.632739284930995	14.674049384984002	14.642095782466583	14.612795999723144	14.63097404056316	14.596724330487085	14.607421735406051	14.612587056340498	14.641646123518347
Con_Pmod_vs_Con_Scr	O14686|2636	O14686	KMT2D	S	2636	SHGASQRSGITSPVE	0.0432609	12.727693285148762	0.9878571258839546	0.3453157232440256	0.6281063175997159	-5.9907	12.622175951394006	12.755938358379854	12.650881925241022	12.68012896612195	12.758642750179542	12.720007121263563	12.673452698192325	12.652674840861836	12.764077865368778	12.82776279673729	12.857310705504268	12.76926544254071
Con_Pmod_vs_Con_Scr	O14686|2640	O14686	KMT2D	S	2640	SQRSGITSPVEKRED	0.0315219	10.529290090996296	0.5668138702046165	0.5826869184402796	0.8002775281876694	-6.32026	10.42825974471354	10.52926235191721	10.462795710195127	10.569013216808411	10.423723426090485	10.522146737488846	10.525625755142332	10.519357068548022	10.398709739789869	10.58490372648984	10.629685488601153	10.75799812617072
Con_Pmod_vs_Con_Scr	O14686|4359	O14686	KMT2D	S	4359	EPPPGRVSPAAAQLA	-0.0525194	15.562846611440872	-1.76473	0.10646634134345756	0.35988622425957484	-5.03415	15.592071018251769	15.532255620597812	15.576260060706948	15.51999111363077	15.509105637428632	15.513931610662612	15.490618888815462	15.43035322141172	15.504472078587664	15.708196703078093	15.722645574079598	15.654257810039384
Con_Pmod_vs_Con_Scr	O14713|41	O14713	ITGB1BP1	S	41	SRSSTVASLDTDSTK	-0.0552444	15.90739587090802	-0.91683	0.3796932055839479	0.6577362616414846	-6.05722	15.913062387094152	16.15457464223596	15.979326268376388	15.878833362779668	16.05498207989433	15.947414527900364	15.810946293183694	15.891258600445394	15.88711282465992	15.781831747695287	15.789313766060529	15.800093950570565
Con_Pmod_vs_Con_Scr	O14737|119	O14737	PDCD5	S	119	NRRKVMDSDEDDDY_	-0.0216316	15.652516637410924	-0.690571	0.5047298596446674	0.7546080130603251	-6.24011	15.709569872723318	15.645313199473447	15.68203282348806	15.702610484600406	15.595810489513577	15.673600172401184	15.676565334861586	15.63952654550999	15.669617031534658	15.616921920587084	15.61946563532208	15.599166138915704
Con_Pmod_vs_Con_Scr	O14737|125	O14737	PDCD5	Y	125	DSDEDDDY_______	-0.0722729	15.7601	-1.78233	0.10342663285316904	0.3550667239692669	-5.00858	15.84349906156693	15.844009292355116	15.835107757297642	15.82361196928095	15.691725636757408	15.790459768126166	15.752382697595968	15.643894186426284	15.746050072183362	15.704657572669252	15.758957465219172	15.686835963331356
Con_Pmod_vs_Con_Scr	O14745|269	O14745	NHERF1	S	269	GEIQKENSREALAEA	-0.0153069	16.629322922922043	-0.363609	0.7233242738015668	0.8780467550285711	-6.41923	16.683488606405547	16.77308528539103	16.739990330682136	16.65054994734739	16.816722945025045	16.6834	16.55281640723331	16.51513817293117	16.520860933588914	16.510528570695513	16.560508547712725	16.544814563194645
Con_Pmod_vs_Con_Scr	O14745|280	O14745	NHERF1	S	280	LAEAALESPRPALVR	0.069813	15.034491145504964	1.9036037412920732	0.0845506	0.3218189611099709	-4.82898	15.262927686011029	15.373631781940208	15.273260817793698	15.342702712174136	15.395677895188772	15.380878702813217	14.657524770004905	14.741552445637003	14.751409276598324	14.765807133616086	14.73443347970569	14.7341
Con_Pmod_vs_Con_Scr	O14745|291	O14745	NHERF1	S	291	ALVRSASSDTSEELN	0.0305433	16.35983636812142	1.0283519678353332	0.32676206223034676	0.6138183661735658	-5.95095	16.635566519103556	16.596857045170502	16.618954880077517	16.665460156872836	16.623945453041877	16.653602847736682	16.08506625323347	16.146405891182656	16.065800555915757	16.07820410295117	16.03940639307797	16.108766319093064
Con_Pmod_vs_Con_Scr	O14745|294	O14745	NHERF1	S	294	RSASSDTSEELNSQD	0.0513291	13.469242173454008	1.457006198423525	0.17419752886956905	0.45641273939625077	-5.45696	13.647820898479102	13.704515910621431	13.69211617580376	13.710450453308216	13.776596561637223	13.711393323281785	13.22449504590068	13.205859760153464	13.13732479566478	13.229143923387731	13.268170828802822	13.323018404407104
Con_Pmod_vs_Con_Scr	O14777|5	O14777	NDC80	S	5	___MKRSSVSSGGAG	-0.133876	6.716905235692841	-3.21803	0.00860476	0.0978608	-2.66609	6.345710867430115	6.513197267619739	6.367344258908258	6.272243537994892	6.257021657050404	6.2953597039073586	7.39155	7.464047606058295	7.463598362196033	6.743465496986417	6.733592656407131	6.7557264524256615
Con_Pmod_vs_Con_Scr	O14786|918	O14786	NRP1	S	918	KDKLNTQSTYSEA__	0.24350359176357017	19.037443729719456	4.550402886425016	9.202425522803236e-4	0.0330049	-0.466314	18.901232316734443	19.048665330174707	18.914107570261823	19.276580568876867	19.074844705942432	19.243090717642385	19.074536587380635	19.05158131589316	19.076447271429405	18.895247867030697	18.937238325941255	18.955752179325664
Con_Pmod_vs_Con_Scr	O14786|921	O14786	NRP1	S	921	LNTQSTYSEA_____	-0.0382626	11.982019846053227	-0.928027	0.37411801839346126	0.6534812548357403	-6.04701	11.821202042271688	11.894589750859968	11.825178217597283	11.767951159289836	11.847397654691424	11.810833308738005	12.182876798822752	12.197690903760035	12.30173363171612	12.079402633181072	12.071513435170688	11.983868616539851
Con_Pmod_vs_Con_Scr	O14795|1251	O14795	UNC13B	S	1251	VRGTGNASPDARASA	-0.0423675	18.874280946220583	-1.44828	0.17657132864801556	0.45936535441582427	-5.46822	18.892152844026217	18.833131417996984	18.86432789992347	18.80412360063077	18.837793799428407	18.82059216554872	18.85631273659035	18.89527008596336	18.920602947618747	18.96185018895912	18.91782602250289	18.887387645457956
Con_Pmod_vs_Con_Scr	O14795|254	O14795	UNC13B	S	254	YPERRAISPTSSSRY	0.011119524928156821	15.768107791703768	0.5301828035955487	0.6069525914749105	0.8167778782209011	-6.34115	15.81291791041096	15.815189212527592	15.8135	15.835420486573495	15.811243385032189	15.828259168876446	15.612540664142264	15.59127939662499	15.60486932184333	15.825451482660052	15.837706091995951	15.82895903699884
Con_Pmod_vs_Con_Scr	O14795|359	O14795	UNC13B	S	359	HFLGPQESFPEENAS	0.0629949	14.661477538388295	1.9802468491058423	0.0743212	0.30097377347930626	-4.71259	14.675808149149194	14.572153984771717	14.664076273364127	14.704748395300218	14.709396002437336	14.686878639267103	14.708797329568316	14.69425274597581	14.642551783147017	14.62015877005562	14.614009743589436	14.644898644033654
Con_Pmod_vs_Con_Scr	O14818|216	O14818	PSMA7	S	216	AVMRRDQSLKILNPE	-0.0244388	15.491833967567835	-0.618967	0.5490572531150272	0.7812391657991116	-6.28827	15.410175850158586	15.543029663406982	15.443586082157688	15.411353149559014	15.47091903500136	15.441202901511478	15.493480731962872	15.459964488557125	15.553311293715495	15.55502862094805	15.595581367782406	15.524374426052969
Con_Pmod_vs_Con_Scr	O14828|32	O14828	SCAMP3	S	32	AVIQHRPSRQYATLD	-0.104555	23.554460953789487	-1.51818	0.15832074945160735	0.43750235649376773	-5.37685	23.64030157939811	23.84649725625932	23.65321618906958	23.543594603831608	23.658960724249926	23.62379610100235	23.49191782700248	23.72279335033835	23.68058379907353	23.31329408910813	23.214448607834232	23.264127318306247
Con_Pmod_vs_Con_Scr	O14828|76	O14828	SCAMP3	S	76	LQPSRKLSPTEPKNY	-0.0795961	20.134731092699035	-1.10159	0.295112	0.5857516647999582	-5.87578	20.253704016106138	20.304696882618885	20.231658603115697	20.116601008224297	20.244404132552884	20.19026613174311	19.97309310447428	19.99536998944781	20.21421687225338	20.11866527636584	20.08260203483793	19.891495060648168
Con_Pmod_vs_Con_Scr	O14867|445	O14867	BACH1	S	445	LGIRISESPEPGQRT	-0.0102295	15.002175027730662	-0.479142	0.6416048727632309	0.8374210074883343	-6.36804	15.085660335997842	15.0983	15.094490521992146	15.07233710455066	15.098566976398615	15.076843318052788	14.863241222764232	14.87226655951396	14.851366494261478	14.965124611469474	14.966017860536375	14.981900343615662
Con_Pmod_vs_Con_Scr	O14874|31	O14874	BCKDK	S	31	ALALRARSTSATDTH	-0.0899251	17.917930119426394	-2.00713	0.0710156	0.2962819925126081	-4.67128	17.9945	17.926135380881053	17.983123215764838	17.909573539697963	17.84302742386884	17.881396513995966	17.992127971710282	17.838573500852036	17.972094017790596	17.88636786839335	17.951385740470794	17.83684218167763
Con_Pmod_vs_Con_Scr	O14907|61	O14907	TAX1BP3	S	61	GIYVTRVSEGGPAEI	0.076944	15.013857199792218	1.987057162349662	0.0734704	0.30006489426278266	-4.70215	14.878439085644189	15.024144475937502	14.903984920469435	15.03006494125997	14.97568203689351	15.03165354977385	15.068779521501638	15.114376646655964	15.079726782511354	14.99708146122346	15.005088775266367	15.057264200369374
Con_Pmod_vs_Con_Scr	O14908|225	O14908	GIPC1	S	225	FDMISQRSAGGRPGS	0.13798716931781563	15.931454975970338	1.808973011707181	0.0989762	0.3478150202781804	-4.96964	15.75316391077719	15.842458540208016	15.701527654591398	16.00349342347005	15.725496468563971	15.982121721496016	16.07957269976368	16.080639475116612	16.252967580877776	15.96179166788345	15.947523950109112	15.846702618786791
Con_Pmod_vs_Con_Scr	O14908|232	O14908	GIPC1	S	232	SAGGRPGSGPQLGTG	-0.0289452	15.716710632912857	-0.72252	0.4856675222563528	0.7408773019512143	-6.21707	15.77729268164896	15.807254323405925	15.787837516457351	15.771470167422098	15.751214888502588	15.762863775016466	15.648444100118056	15.733087760335769	15.593199988497153	15.633297707069747	15.605188847631164	15.729375838849004
Con_Pmod_vs_Con_Scr	O14908|238	O14908	GIPC1	T	238	GSGPQLGTGRGTLRL	0.00929954	22.509458885292144	0.11782800492055717	0.9084150385580327	0.9643719428034964	-6.48209	22.835734615257753	22.991519377330363	22.837330251507098	22.836762278475145	22.94722843622478	22.908492135362156	22.05371973157021	22.379037309591983	22.1955	22.089249619650495	21.937057514917623	22.10184370687844
Con_Pmod_vs_Con_Scr	O14920|672	O14920	IKBKB	S	672	VRGPVSGSPDSMNAS	0.045112088304271936	13.3119	1.2387892942253855	0.24225127031990673	0.5342475240818075	-5.72422	13.260273401534192	13.256957268141466	13.25766610670459	13.28825790469832	13.323478206128662	13.298496930466072	13.363417975466913	13.475189927283187	13.35422927611262	13.29267810226542	13.236309700895175	13.335288334890176
Con_Pmod_vs_Con_Scr	O14920|675	O14920	IKBKB	S	675	PVSGSPDSMNASRLS	0.11817752109637247	9.32305	2.3052131723020315	0.0425673	0.22794655252349422	-4.19894	9.164191900931243	9.342066012686455	9.190585273867402	9.366242864226114	9.310744210380856	9.374388676167245	9.378643650337745	9.495990735371702	9.399398673955828	9.263824439048276	9.240679941569994	9.349837938677858
Con_Pmod_vs_Con_Scr	O14924|172	O14924	RGS12	S	172	KLKQRSLSESAATRF	0.26290079491244533	13.262062878131134	5.146014409310435	3.647149206769047e-4	0.0205737	0.445358	13.060359711834629	12.906469295426964	13.058822981766363	13.28954956401919	13.279491554598032	13.245313255148073	13.537805754264092	13.468582347130194	13.371266741024591	13.270206666547594	13.296569712054811	13.360316953759078
Con_Pmod_vs_Con_Scr	O14924|661	O14924	RGS12	S	661	KRFSITRSLDDLESA	-0.00276555	14.77008836494492	-0.104312	0.9188761172816196	0.9683963870752399	-6.48369	14.628856618901832	14.580497161460896	14.632491292737534	14.618177305353388	14.614409991690623	14.600961125682566	14.974439257506122	14.937890683812086	14.907742150370336	14.89654518397094	14.914842327776512	14.934207280076208
Con_Pmod_vs_Con_Scr	O14924|850	O14924	RGS12	S	850	DSQQVPSSPASKHSL	0.041123477510030426	17.483036323257664	1.6701765067040273	0.12421892517016266	0.39142750352020694	-5.16909	17.33159162619191	17.27487952768113	17.319582806398312	17.36937886436755	17.329326708178602	17.350718820255278	17.601569881329887	17.583606015625726	17.56759883402323	17.68527005593726	17.68572433298668	17.697188406116407
Con_Pmod_vs_Con_Scr	O14924|879	O14924	RGS12	S	879	GKSKSGRSLNEELGD	0.0327636	13.619318417942242	0.9269917285570493	0.3746310087408097	0.6537739946501556	-6.04796	13.3889	13.486772732088424	13.410015338265664	13.454941796728164	13.463015481492487	13.466034465904483	13.79479949443245	13.87680604603952	13.794076923495506	13.751215874893438	13.732338494253836	13.812891422752928
Con_Pmod_vs_Con_Scr	O14936|582	O14936	CASK	S	582	SSSCERDSPSTSRQS	-0.00535206	13.712949760416016	-0.0685744	0.9466094963708631	0.9790996512999199	-6.48699	13.946814691828797	13.971386171646024	13.888814970415936	14.07386335048852	13.70588848910436	14.011207816696198	13.452366607796476	13.41278089398098	13.531327235307236	13.534932348288365	13.5397	13.486270712800414
Con_Pmod_vs_Con_Scr	O14939|155	O14939	PLD2	S	155	PRAGPEGSTRHAASK	-0.10221	7.843076472735277	-0.954598	0.3611216848836659	0.6430564533044207	-6.02237	7.769603802299635	8.00939	7.82414	7.660309512706355	7.879564439161087	7.756634884066297	7.816665995550688	7.682420649496622	8.049984408620121	7.930216561905876	8.023619790026101	7.714361764803302
Con_Pmod_vs_Con_Scr	O14967|554	O14967	CLGN	S	554	MLEKEEESEPEEKSE	-0.0749252	2.784624505395865	-0.190781	0.8523154046664451	0.9391752959908254	-6.47007	2.5470854772062808	2.366321994052891	2.416132186130895	2.705158867081293	1.9136365730759053	2.4859687622836795	3.1210623173416927	4.131907150713602	2.636773597143005	2.9195718140185427	2.4139898438902563	3.7578854818123375
Con_Pmod_vs_Con_Scr	O14967|594	O14967	CLGN	S	594	EADESTGSGDGPIKS	0.12387891694929465	15.743980365842429	2.7681508228499143	0.018932292188426608	0.14804873038343083	-3.43008	15.467278368177514	15.46634043953405	15.50057814711464	15.56626519628349	15.665971020120503	15.573597489270078	15.9274	15.778074530221009	15.888148825756852	16.009824312854477	16.09577133842878	15.988470992571663
Con_Pmod_vs_Con_Scr	O14974|299	O14974	PPP1R12A	S	299	SEKRDKKSPLIESTA	-0.0158325	19.573284511135952	-0.55917	0.5877074868010985	0.8038274609651331	-6.32473	19.52733102745936	19.47827557117857	19.524246225373176	19.49079635995964	19.505785412965803	19.48577347857407	19.605102309059035	19.53388822049886	19.593440643697203	19.71275325002632	19.7402	19.68178769217831
Con_Pmod_vs_Con_Scr	O14974|304	O14974	PPP1R12A	S	304	KKSPLIESTANMDNN	-0.0474742	20.30821265457058	-0.913904	0.3811594332547029	0.6589789808725709	-6.05987	20.2357	20.222784038238785	20.24555736118497	20.158550319170903	20.23014223585712	20.172895999858543	20.282638826722977	20.13461316136125	20.3193	20.575062876999397	20.64431889576874	20.47696970270256
Con_Pmod_vs_Con_Scr	O14974|445	O14974	PPP1R12A	S	445	LGLRKTGSYGALAEI	-0.016046	17.491862801531944	-0.371578	0.7175543508816679	0.8755516205988183	-6.41614	17.572541306408308	17.38631620930946	17.52953078513571	17.508308169512294	17.457074667553584	17.474867338520102	17.514888194425314	17.50664669857378	17.453670774710186	17.510375045435588	17.479169643530856	17.508964785268134
Con_Pmod_vs_Con_Scr	O14974|479	O14974	PPP1R12A	S	479	SSPRLSSSLDNKEKE	-0.0602268	13.972158134352794	-1.23738	0.242752	0.5346235072269866	-5.72584	13.913348977181672	13.992726523102316	13.95531058899594	13.800208786016617	14.021517962729924	13.858978865476823	14.01997559468408	14.03289475935552	14.060728319626604	14.00976651214709	14.020428966396128	13.980011756520817
Con_Pmod_vs_Con_Scr	O14974|507	O14974	PPP1R12A	S	507	TIPRRLASTSDIEEK	-0.104203	25.216692871691787	-2.04251	0.0668756	0.2885774592402104	-4.61655	25.318960756844668	25.256825217092324	25.35735056423514	25.140953121858168	25.326862815705887	25.15271217751085	25.15934223823438	25.09384990573313	25.045469186886347	25.217915309963857	25.260100052172476	25.26997311406422
Con_Pmod_vs_Con_Scr	O14974|508	O14974	PPP1R12A	T	508	IPRRLASTSDIEEKE	0.0571661	13.052501896530233	0.7510698370514779	0.46901675385230557	0.7260620581530155	-6.19569	13.11429793358709	12.995400409387084	13.086827901532684	13.09200669626007	13.173592239339609	13.102425712043132	12.981093175375667	13.219024870086391	12.92879727369224	12.9979	12.856800802893684	13.081865313559634
Con_Pmod_vs_Con_Scr	O14974|509	O14974	PPP1R12A	S	509	PRRLASTSDIEEKEN	0.0626629	14.506062622047347	0.680953	0.5105562940491514	0.7580813364959278	-6.24686	14.772634041639089	14.494829139573298	14.656941259173797	14.864983122858344	14.487745015257236	14.759665079518554	14.363349542216412	14.410239542630473	14.29806276195343	14.344061800605424	14.2556	14.364677795047308
Con_Pmod_vs_Con_Scr	O14974|527	O14974	PPP1R12A	S	527	SSLRTSSSYTRRKWE	-0.0374272	22.797070422513546	-0.534071	0.6043523536967408	0.8149635850736656	-6.33899	22.953780261540302	22.862006367271295	22.91813076561741	22.78381213903759	22.98930235107138	22.848521421104387	22.611299455643433	22.8609	22.70678991422983	22.75137311717446	22.58931052977345	22.689666012724302
Con_Pmod_vs_Con_Scr	O14974|696	O14974	PPP1R12A	T	696	ARQSRRSTQGVTLTD	-0.00934465	36.11010622479756	-0.0622214	0.9515485276944762	0.9803685661250784	-6.48744	36.82424974100826	36.78407421634677	36.74295184726594	36.561004398454514	37.00684635148545	36.75539109196388	35.3872	35.66742266094771	35.90452387802628	35.464513610521166	35.23511040684684	34.987965361368126
Con_Pmod_vs_Con_Scr	O14974|862	O14974	PPP1R12A	S	862	VSFWTQDSDENEQEQ	0.00744344	11.70421200007014	0.19478741648511771	0.8492559461056397	0.9368359091253923	-6.46925	11.62881567920402	11.610397132415896	11.611576144529812	11.639500360400817	11.60013814748483	11.633480770255924	11.704595261562352	11.820156395167947	11.695590489085072	11.841473580078386	11.77777871459424	11.887041326062382
Con_Pmod_vs_Con_Scr	O14974|995	O14974	PPP1R12A	S	995	RALERRISEMEEELK	0.07254	9.00986	1.3637435771671311	0.20100980550079675	0.4889883933639772	-5.57487	8.802608493328467	8.675933065443026	8.825172765657715	8.812851318623743	8.91541	8.793076639785927	9.328447269313523	9.237797973618882	9.163356170891596	9.145758628672349	9.19209	9.225879477961584
Con_Pmod_vs_Con_Scr	O14976|770	O14976	GAK	S	770	QYDAGAGSPEAEPTD	0.20434518280113068	12.089853113692454	4.197552981653902	0.00162973	0.0429806	-1.03041	12.103896046842396	11.915562118470197	12.043918533071754	12.227144394686222	12.22774469857329	12.22152315352822	11.951176255961895	12.05928244580431	11.95851164251205	12.169131713363251	12.067080922251948	12.133265439243916
Con_Pmod_vs_Con_Scr	O14976|826;829	O14976	GAK	S;S	826;829	LMEDRDESEVSDEGG;DRDESEVSDEGGSPI	0.0641385	16.68600211450029	1.6350203540765862	0.1314684321237933	0.40245438405242845	-5.21819	16.778018330897353	16.65555709876869	16.750532942327034	16.808105533655404	16.78177059081525	16.78664783801351	16.603020568354495	16.653233227680193	16.543890053314648	16.627083814443505	16.581014112438712	16.663151263294683
Con_Pmod_vs_Con_Scr	O14976|829	O14976	GAK	S	829	DRDESEVSDEGGSPI	0.0506299	15.449330546660306	1.8178557122709251	0.0975318	0.3465832606134302	-4.95659	15.494265688814597	15.44323128987634	15.471567354993722	15.536759535250775	15.497046314957684	15.527148099924588	15.348444438231136	15.40538072844164	15.345006854385408	15.452089807384592	15.410078328436802	15.460948119226396
Con_Pmod_vs_Con_Scr	O14979|201	O14979	HNRNPDL	S	201	VLFKDAASVDKVLEL	0.22113166144595386	1.0621570582302693	1.8395833737782865	0.0940796	0.3397676791458392	-4.92453	0.7649331950615945	0.4119124832282583	0.7972183070451493	0.8125403184222417	1.05698	0.7679370545670317	1.568243697613548	1.3933222662957956	1.1968591424737165	1.2458035102635634	1.319111829549076	1.4110212975596657
Con_Pmod_vs_Con_Scr	O14979|241	O14979	HNRNPDL	S	241	KVFVGGLSPDTSEEQ	-0.0255158	17.381282658290274	-1.01886	0.33104214764495465	0.6165887725855593	-5.96038	17.425057205023233	17.37295756083475	17.424747045233833	17.38585814587083	17.38749621806646	17.372859932298194	17.38724693433354	17.339014675723476	17.34199355330322	17.36919306658347	17.389253439534773	17.379714122677516
Con_Pmod_vs_Con_Scr	O14981|224	O14981	BTAF1	S	224	KLFAKQRSRDAVETN	-0.0127272	11.94298811390375	-0.545956	0.5964405079167672	0.8086498258526424	-6.33231	11.820431510164974	11.84460837497976	11.825823259366814	11.799847933233346	11.838181093828506	11.814652525412694	12.08931927136261	12.086955192458277	12.11980839536922	12.033272960202284	12.036135324497607	12.006821525968912
Con_Pmod_vs_Con_Scr	O14981|95	O14981	BTAF1	S	95	SESSMEDSPTTERLN	0.0378903	10.381203330127608	0.5260960459555595	0.6096916970801566	0.8184613446006374	-6.34339	10.428455880164002	10.103207239176728	10.308734782746283	10.349064944322052	10.274686071032423	10.33031780746834	10.464760998911723	10.563626281512647	10.535716476603636	10.500205274906088	10.358133263736429	10.357530940950957
Con_Pmod_vs_Con_Scr	O15013|1232	O15013	ARHGEF10	S	1232	DKDKSRDSLAPGPEP	-0.1977	18.336297990188974	-3.24206	0.00825192	0.0959694	-2.62523	18.262616553825495	18.501980016386852	18.317154166440822	18.083992625758835	18.247403536951808	18.157254066579824	18.50546977796346	18.60329056201227	18.619338037139425	18.25285503251791	18.24425942361687	18.23996208307413
Con_Pmod_vs_Con_Scr	O15013|379	O15013	ARHGEF10	S	379	RSFIRTKSLIAQDHR	-0.0643691	24.81386048795851	-0.910543	0.3828490875956586	0.6603433890321043	-6.0629	25.17112434545793	25.078503728797397	25.066873946397187	25.07887505547358	24.951519162240174	25.093000389252936	24.6374	24.88919886695176	24.837424451612694	24.42817837907365	24.239820268533386	24.29439975041595
Con_Pmod_vs_Con_Scr	O15013|59	O15013	ARHGEF10	S	59	GEQFDFDSGDEIPEA	-0.0382341	17.612584507129807	-1.01871	0.3311112546199022	0.6166293116510594	-5.96053	17.639068237359265	17.569845763978655	17.62440477590742	17.591298524114958	17.556114780838694	17.571203243279015	17.665638107217752	17.726358495802764	17.60349521318671	17.593408308823108	17.55486164626998	17.655316988779372
Con_Pmod_vs_Con_Scr	O15014|1055	O15014	ZNF609	S	1055	PTLTKAPSLTDLVKS	0.0992462	11.051018360361638	1.8591844346183088	0.0910619	0.3334306796876429	-4.89545	10.848261586263332	11.028380443079673	10.929249674495892	11.044855728866388	11.032306773547852	11.026467770415463	11.124558708808271	11.030760436660284	10.995888934662348	11.09307672330825	11.20542727921898	11.25298626501293
Con_Pmod_vs_Con_Scr	O15014|1313	O15014	ZNF609	S	1313	ASHYKSKSPTISDKT	-0.113759	15.961283578478701	-1.85491	0.091712	0.3346969692821539	-4.9018	15.958584707901473	16.020326004494635	16.044057074995735	15.867709063196465	15.96415144662653	15.849831539425436	15.889889976726993	15.668676451179374	15.708333012213652	16.094808030755466	16.256215637015423	16.21281999721324
Con_Pmod_vs_Con_Scr	O15014|1315	O15014	ZNF609	T	1315	HYKSKSPTISDKTSQ	0.031235809603847642	15.911221697762764	0.9674866513479432	0.354935	0.6367783902034835	-6.0102	15.901784986426886	15.91816968977193	15.901580030858792	15.9427	15.92815189772048	15.944344714887968	15.881367614796677	15.811208718800197	15.918434516283687	15.935582914063763	15.9694	15.881889110713992
Con_Pmod_vs_Con_Scr	O15014|467	O15014	ZNF609	S	467	SKRVRTNSMGSATGP	-0.058867	13.713178231455801	-0.760928	0.4633520518340094	0.7226189844292207	-6.18814	13.587912523101627	13.914496824761745	13.668222732738316	13.57371424525185	13.761	13.6593	13.641834354071175	13.678771650906071	13.781128141528855	13.760872109218912	13.80096734771837	13.729901926066889
Con_Pmod_vs_Con_Scr	O15014|560	O15014	ZNF609	S	560	VSQKGSLSPARSATP	0.0914711	13.1603	3.075838881075754	0.011031596387185044	0.11057499602738351	-2.908	13.19775630401594	13.10034583142405	13.157987704837923	13.258599242106294	13.22069909292729	13.251204666889931	13.06611895028198	13.095549681585332	13.09566649613512	13.191237142918231	13.147052177901465	13.141663195105645
Con_Pmod_vs_Con_Scr	O15014|576	O15014	ZNF609	S	576	VRLVEPHSPSPSSKF	-0.0463379	16.168418081135933	-1.83427	0.094914	0.3411942569189551	-4.93239	16.231800843053897	16.246705410040008	16.25327479076822	16.199120232403654	16.20509015970327	16.18855689599299	16.112982155228746	16.05754220403904	16.054794646686137	16.128474724455227	16.170452611341315	16.172222299918687
Con_Pmod_vs_Con_Scr	O15014|746	O15014	ZNF609	T	746	KELESPLTPGKVCRA	-0.0552609	12.027032264824856	-2.07137	0.063668	0.28155475568324695	-4.57161	12.137406033123186	12.145741148231762	12.150515071900465	12.087706733774484	12.098055257107177	12.082117412512105	11.94249564534744	11.960104456006016	11.891954752699116	11.92287998693496	11.924291510589672	11.981119169671889
Con_Pmod_vs_Con_Scr	O15014|758	O15014	ZNF609	S	758	CRAEEGKSPFRESSG	-0.14448	14.013063044120567	-4.4852	0.00102145	0.0344477	-0.569273	14.313932763067903	14.32007970954847	14.292983039847815	14.14224543066074	14.179814599414168	14.17149649229698	13.70884238271204	13.807626580392329	13.803407383991548	13.84761347953173	13.783225242694728	13.78548942528836
Con_Pmod_vs_Con_Scr	O15014|804	O15014	ZNF609	S	804	SFTDNAPSPSIGGSS	0.00617471	13.046320081932143	0.0972605	0.9243408213613489	0.9703593798289967	-6.48445	12.941902386599237	13.148480533484776	13.022421569483171	12.94646126911622	13.174807268816998	13.010060069413392	12.957951459928328	13.039529414049747	12.957043620504065	13.08878475663943	13.10117841024119	13.167220224909164
Con_Pmod_vs_Con_Scr	O15020|1255	O15020	SPTBN2	S	1255	KIREKADSIERRHKK	-0.0616418	16.62523829833813	-2.0533	0.0656587	0.28667192372766553	-4.59978	16.858909674354198	16.755564365097907	16.836195336267163	16.73980195506986	16.782803473469258	16.74313845654888	16.42164882838236	16.42699436056811	16.424764294673267	16.527027268392466	16.500136837456964	16.485874729777127
Con_Pmod_vs_Con_Scr	O15020|2171	O15020	SPTBN2	S	2171	PEGPGPGSGDEANGP	0.0508545	14.890467410851507	1.265345825265586	0.23295307635357296	0.5252576494771758	-5.69335	14.854821617803442	14.736561514101853	14.80366202055155	14.856327548354244	14.835219886715707	14.856061296506777	14.929475759015853	15.047003411084722	14.96563081544063	14.97713149907361	14.881642960394046	14.942070601175654
Con_Pmod_vs_Con_Scr	O15020|772	O15020	SPTBN2	S	772	DALRLVSSPELGHDE	-0.113638	15.520044905841317	-3.90604	0.0026453	0.0544742	-1.50824	15.631820200757003	15.608262280910203	15.621489869464405	15.551066144925755	15.448731574800444	15.520861288642951	15.466029012572688	15.422365488852195	15.434617348192743	15.499155333138487	15.51894881867964	15.517191509159298
Con_Pmod_vs_Con_Scr	O15021|1370	O15021	MAST4	S	1370	YRSGRRKSAGNIPLS	-0.0366868	20.659661932894622	-0.940903	0.3677791771823242	0.6479825332096476	-6.03514	20.978799388831906	20.99636362910223	20.98756361805201	20.88241580917927	21.04071878857989	20.929531545891017	20.4356	20.515366754802255	20.490022215150812	20.246021952011382	20.2036	20.209924978993307
Con_Pmod_vs_Con_Scr	O15021|1377	O15021	MAST4	S	1377	SAGNIPLSPLARTPS	-0.0781722	3.904821603005234	-1.09766	0.2967492045260785	0.5860689686223567	-5.87992	3.7676749495243063	3.611325048900513	3.7984700893537617	3.647296791376215	3.696827743452351	3.598828963671859	4.2659852592714005	3.9993787005362975	4.0540873728827105	4.07311	4.209992323331508	4.134886395373972
Con_Pmod_vs_Con_Scr	O15021|1391	O15021	MAST4	S	1391	SPTPQPTSPQRSPSP	-0.0472281	10.160365403500563	-0.566144	0.5831259397995471	0.8006573233358563	-6.32065	10.168211500036264	10.151921724700648	10.208715684651828	10.09658622538114	10.201430801554702	10.08914772327586	10.273644322620362	10.410793067195712	10.082421760701804	10.02035781699101	9.979299532871517	10.241854682025904
Con_Pmod_vs_Con_Scr	O15021|1419	O15021	MAST4	S	1419	AFPSKMHSPPTIVRH	0.0239328	14.331840270775393	0.48320271872330695	0.6388136438736607	0.8361269309997343	-6.366	14.429391509393213	14.254050923553956	14.363491200542116	14.411729052717323	14.32146009312191	14.38554297915182	14.369816556812069	14.4709	14.365008844041045	14.239710704369154	14.144259774588049	14.226696069151462
Con_Pmod_vs_Con_Scr	O15021|1446	O15021	MAST4	S	1446	PLLKRVQSEEKLSPS	0.012563436423619123	18.703975598631907	0.27304521490656236	0.7900839217370618	0.9114759453704959	-6.44977	18.92484898075675	18.846275982296405	18.897712785888324	18.940878706178697	18.850862908330186	18.914786443703456	18.59858089221983	18.471693443029324	18.61482157867395	18.474299083193753	18.516563069110255	18.39638331020195
Con_Pmod_vs_Con_Scr	O15021|1467	O15021	MAST4	S	1467	HLCSRKHSLEVTQEE	-0.0429442	11.079879417611302	-1.12653	0.2848881446488499	0.5753267663021903	-5.84925	11.038179748073466	11.118252789313823	11.086318274869347	10.978653300553846	11.126205197913094	11.00905980882433	11.269751303006643	11.263555427153372	11.241782184084888	10.919003035011276	10.9493	10.958476890448544
Con_Pmod_vs_Con_Scr	O15021|1471	O15021	MAST4	T	1471	RKHSLEVTQEEVQRE	-0.12969	15.253830275986832	-5.28281	2.9698424611507426e-4	0.018939192300059884	0.6471001326866519	15.293674961434746	15.352754848547924	15.31870278806084	15.181969329856514	15.207340339413197	15.186752697251102	15.360500603726084	15.329159250306942	15.344690725203565	15.137921405249458	15.171418268349656	15.16107809444196
Con_Pmod_vs_Con_Scr	O15021|1523	O15021	MAST4	S	1523	RKVGRQESVDDLDRD	0.00936425	18.022338528542022	0.20567540575807325	0.840955	0.9340891848435334	-6.46693	18.174531472860615	18.091816091009097	18.12934909713204	18.145330477696575	18.124889943632684	18.153568993526928	17.965211567367835	17.932898345517867	18.071729358650945	17.881159578084002	17.860216475604425	17.73736094142127
Con_Pmod_vs_Con_Scr	O15021|1586	O15021	MAST4	T	1586	KAVERSSTFENKASM	0.18383119274712634	14.673558941075875	3.03709	0.0118064	0.11408804226665005	-2.97392	14.863869700354163	14.726582526427563	14.81691967859749	15.061038374996883	14.892796823950286	15.005030284673428	14.634148583985864	14.719293854482078	14.543636604952502	14.265898704493589	14.200054543190486	14.353437612806172
Con_Pmod_vs_Con_Scr	O15021|1779	O15021	MAST4	S	1779	PGLVAPESPVRKSPS	0.12388511398434154	12.870628375404515	1.97919	0.0744538	0.30119223737577927	-4.71421	12.85965841886862	12.955707067119532	12.875739613564232	13.012347651069147	13.02452272992818	13.025890060508084	12.852828401573724	13.055141146154336	12.832982487047012	12.63685501215593	12.558454645882565	12.757413270982822
Con_Pmod_vs_Con_Scr	O15021|1822	O15021	MAST4	S	1822	ASKTELPSPESAQSP	0.013821081866449703	15.865395135510122	0.6543356585848088	0.5268885592618557	0.7685212540371765	-6.26509	15.924789167582505	15.895638604112706	15.913938740573103	15.928909626464312	15.920339591336235	15.92658054006711	15.794909474829325	15.81012490746316	15.798334215553904	15.831429730921489	15.81584225589176	15.823904771325845
Con_Pmod_vs_Con_Scr	O15021|1860	O15021	MAST4	S	1860	TTSARELSPSSLKMN	-0.042068	13.663446345365966	-1.17747	0.26486406110261596	0.5553363277323718	-5.79364	13.763828384095234	13.843089973507576	13.762672333139532	13.767850880755445	13.704264949385824	13.771270840529054	13.615709823026496	13.593805816875449	13.6869	13.493268373226671	13.510315593114433	13.448427911765078
Con_Pmod_vs_Con_Scr	O15021|2442	O15021	MAST4	S	2442	NGMKRSPSATGQSSF	0.1551898083844936	10.44323525301771	1.8942606449939026	0.0858834	0.3242201052177412	-4.84303	10.5348	10.45214776991699	10.4668	10.789339042207128	10.426561414928504	10.703418869369038	10.496455868876774	10.592215864240366	10.443741289747386	10.130523397996296	10.061436444786706	10.221380942709132
Con_Pmod_vs_Con_Scr	O15027|1069	O15027	SEC16A	S	1069	VPPQQQASPPQLPKA	0.019782475784403175	17.59037898114718	0.5354690468307356	0.6034189243618122	0.8144304500588876	-6.33821	17.592603381137447	17.57239851859042	17.59594248581366	17.655231142857232	17.55131307499503	17.61374759504247	17.64851034490505	17.62025545988928	17.55081864158355	17.52321336514695	17.546681559706183	17.61383220409889
Con_Pmod_vs_Con_Scr	O15027|1226	O15027	SEC16A	S	1226	ERPSSRASHSSERPP	0.11308938464808982	9.416046645673092	2.1139415330784606	0.0592007	0.2716193295954893	-4.50486	9.186487818003382	9.042428887644936	9.188436368348368	9.294431909809177	9.228517109047443	9.233672209084336	9.761915160285923	9.615915139177106	9.582782304990811	9.567806692193493	9.63706	9.653107180213835
Con_Pmod_vs_Con_Scr	O15027|1327	O15027	SEC16A	S	1327	YDPRFTGSFDDDPDP	-0.00941763	14.523435128325085	-0.352526	0.7313786567861982	0.8812442900554641	-6.42342	14.456597082186942	14.489273025436756	14.47472993685342	14.4851	14.44096929903986	14.466247504125167	14.66564599177048	14.608657354020355	14.61350529408565	14.495834824938203	14.54068567083956	14.54394520625682
Con_Pmod_vs_Con_Scr	O15027|1347	O15027	SEC16A	S	1347	GEEVDRRSVHSEHSA	-0.0544825	9.499304187627358	-1.98158	0.0741535	0.30081096976750643	-4.71054	9.385666478180893	9.341364276181578	9.395325341359404	9.30183	9.357014332606004	9.300065531791311	9.769459659376269	9.719438238469053	9.722450854512427	9.555126734707702	9.579506349730837	9.5644
Con_Pmod_vs_Con_Scr	O15027|1347;1350	O15027	SEC16A	S;S	1347;1350	GEEVDRRSVHSEHSA;VDRRSVHSEHSARSL	-0.0554288	18.12292982597947	-0.713306	0.4911189191419961	0.7447642434772163	-6.22381	18.212680432492956	18.16249214620433	18.154144495824077	18.037186145456623	18.20310859190304	18.12273588773083	18.12628267433613	18.24718878978451	18.40117543295979	18.063355646226547	17.94743363697189	17.797374031862923
Con_Pmod_vs_Con_Scr	O15027|1347;1350;1353	O15027	SEC16A	S;S;S	1347;1350;1353	GEEVDRRSVHSEHSA;VDRRSVHSEHSARSL;RSVHSEHSARSLHSA	-0.0615041	15.912614574465621	-1.90409	0.084482	0.32165043755717615	-4.82825	15.99627214483803	15.997942264135252	15.966127119988952	15.934547556774856	15.894957047044192	15.946324655481854	15.89963216377864	15.948836377718106	15.999617820818289	15.829384173677846	15.786929608564254	15.750803960767191
Con_Pmod_vs_Con_Scr	O15027|1347;1353	O15027	SEC16A	S;S	1347;1353	GEEVDRRSVHSEHSA;RSVHSEHSARSLHSA	-0.151474	9.176542728418326	-4.10307	0.00190455	0.0470096	-1.18419	9.157498728101512	9.047596252306054	9.134931476967516	8.964181288990899	8.967001513056768	8.954421346579252	9.386903426279908	9.304123816757324	9.38675	9.288188735793394	9.304996506651996	9.221919402828917
Con_Pmod_vs_Con_Scr	O15027|1350	O15027	SEC16A	S	1350	VDRRSVHSEHSARSL	-0.0369829	13.337999679906956	-0.719192	0.48763232675232515	0.742502	-6.21952	13.349518558878415	13.202908567692033	13.348527120749866	13.2709	13.281823500834596	13.237331507077352	13.52611005318115	13.347629290073977	13.418699467738884	13.334166556312269	13.409638972730852	13.32879188474578
Con_Pmod_vs_Con_Scr	O15027|1359	O15027	SEC16A	S	1359	HSARSLHSAHSLASR	-0.100113	15.899211193007677	-2.85834	0.0161572	0.1367618222437562	-3.27749	15.968157241307274	15.9618	15.951679917640334	15.85174887360827	15.864456313066968	15.865069544479102	15.89302870759067	16.02083109581226	15.92465482649241	15.851102366154702	15.77846451308718	15.85956490251036
Con_Pmod_vs_Con_Scr	O15027|1441	O15027	SEC16A	S	1441	QVSSRPTSPEKFSVP	0.025237387820403967	8.007074005181117	0.8500308868781964	0.41416409338368765	0.6862874758554703	-6.11591	8.024811324734898	7.949987217106296	7.98934	8.006907623046637	8.016058063113725	8.016887253032166	7.982327406820985	8.04266	8.039219361348186	8.045961071848549	7.987746131265003	7.982983536458164
Con_Pmod_vs_Con_Scr	O15027|1964	O15027	SEC16A	S	1964	LPDGPLASPARVPMF	0.042562055307040936	19.014224764639252	0.36139062898493735	0.7249334053923777	0.8788685664198554	-6.42008	19.106701082547623	18.69209754170309	18.988082824439704	19.07879978874598	18.852617173259947	18.983150652605605	19.03398759350117	19.207072451196215	18.863966618704456	19.141278413492024	18.97555613424165	19.24738690123356
Con_Pmod_vs_Con_Scr	O15027|2022	O15027	SEC16A	S	2022	HLLQEARSPDPGIVP	-0.115702	14.330470578145821	-3.53897	0.00493622	0.0729654	-2.12208	14.35508159540566	14.29721220023394	14.328888916755323	14.251964247757392	14.156450542568814	14.225660510210426	14.423647293035105	14.46376529459423	14.398079432073324	14.356450717597175	14.323864096875282	14.384582090643176
Con_Pmod_vs_Con_Scr	O15027|2054	O15027	SEC16A	T	2054	DGKFANLTPSRTVPD	-0.0552024	14.222992508433297	-1.74771	0.10948160474884219	0.36493868249614064	-5.05873	14.194900320793954	14.30480795490026	14.236167598889963	14.170039793898496	14.217880900623888	14.18234799346865	14.259656302194236	14.258523762388524	14.234982869083916	14.17565508472337	14.207584829216806	14.233362691017494
Con_Pmod_vs_Con_Scr	O15027|2083	O15027	SEC16A	S	2083	TQPPLSLSPAPETKR	-0.0439049	18.479984574642632	-1.39533	0.19156446408691097	0.47813418546644576	-5.53553	18.454726090614184	18.568051140701257	18.495979025561375	18.457170095547333	18.47000867971267	18.459862824812912	18.54911026393991	18.514704281192824	18.51810226538368	18.38822046388222	18.438429461865415	18.44545030249782
Con_Pmod_vs_Con_Scr	O15027|2271	O15027	SEC16A	S	2271	KVLSSAASLPGSELP	-0.0296255	16.24067787334495	-0.85564	0.41118997436682025	0.6837626179947124	-6.11113	16.2003	16.257134775181324	16.217763121590725	16.241867425908502	16.134500161790196	16.209994103197044	16.342955553830016	16.287233224770215	16.283042258806983	16.197640600415088	16.247384843447097	16.2683
Con_Pmod_vs_Con_Scr	O15027|342	O15027	SEC16A	S	342	NPLARGDSPENRTHH	-0.0236924	21.049825984778778	-0.358997	0.7266713987714335	0.8790367114425518	-6.42099	21.064677618512366	20.897750723278055	21.00517332613527	20.90823077557219	21.036574535435783	20.95171909227643	21.189605137523017	21.195103113954712	21.34041871973151	21.09714830794372	21.032743737506216	20.878766729476048
Con_Pmod_vs_Con_Scr	O15027|569	O15027	SEC16A	S	569	FFKQIDSSPVGGETD	-0.0277688	18.7167	-0.909948	0.383148	0.6606869824406816	-6.06344	18.704315113146667	18.621890772270316	18.697883782762396	18.64683511373923	18.65948334290036	18.634464842792266	18.8249	18.748855714848716	18.787470485059497	18.75550918241813	18.78172304089749	18.73724319564752
Con_Pmod_vs_Con_Scr	O15031|1244	O15031	PLXNB2	S	1244	QLEGLEESVRDRCKK	0.19637728030871315	16.40021722789253	2.4897117955254693	0.030860504852312794	0.19224099294503488	-3.8963	16.21112106897486	16.25897394241391	16.170097552297275	16.475665694810097	16.28832011103379	16.46533859876829	16.545698592752057	16.43351179925203	16.716642286014896	16.458078913115365	16.495133360630607	16.284024814647154
Con_Pmod_vs_Con_Scr	O15037|10	O15037	KHNYN	S	10	TWGARPASPDRFAVS	0.015211159033356125	16.53394434287058	0.35100664972648543	0.7324853010160801	0.8817076393773716	-6.42399	16.60120438905017	16.417034987578205	16.539174649500204	16.57045255636507	16.48949127430476	16.543103672558825	16.536086611279742	16.563129261049454	16.534626958833485	16.57265940068662	16.513146365753492	16.52722198748694
Con_Pmod_vs_Con_Scr	O15037|411;413	O15037	KHNYN	T;T	411;413	ARGGNLVTGTQRFKE;GGNLVTGTQRFKEAL	0.00432405	18.75280795519746	0.059935653674196745	0.9533260151290812	0.9809715777754812	-6.48759	18.844714275372535	19.03652148848498	18.89667956624011	18.815319855606734	19.06780691509896	18.90776070626458	18.36646813910422	18.37983716403447	18.520620205690893	18.76176943336254	18.781055336199973	18.655142376909545
Con_Pmod_vs_Con_Scr	O15042|485	O15042	U2SURP	S	485	YSILQGDSPTKWRTE	0.045575540575265805	9.815902674433397	0.8931286177062052	0.3916865749536077	0.6673028896989702	-6.07848	9.58312	9.68457	9.63392	9.710709421788524	9.64696	9.680664263134766	10.128635926544089	9.936972682706276	10.045	9.84837	9.984096430580266	9.907814717208812
Con_Pmod_vs_Con_Scr	O15042|5	O15042	U2SURP	T	5	___MADKTPGGSQKA	-0.0228187	13.891397472461884	-0.538779	0.601212	0.8120328934153705	-6.33636	13.878420331475724	14.038492268371826	13.906784232514374	13.882462539298574	13.948947730801736	13.923830440721034	13.87499349941542	13.967090286641715	13.951952581795927	13.780268154020302	13.759567113200731	13.783960491285256
Con_Pmod_vs_Con_Scr	O15042|974	O15042	U2SURP	S	974	SRSSHKDSPRDVSKK	-0.0791506	16.151562990204056	-1.38177	0.19557088697238995	0.48406876055136344	-5.55249	16.132990036179187	16.130205156578047	16.14027481307589	16.015889543963972	16.108338840138575	16.041789772766517	16.229447253707782	16.091846357504533	16.300646970577493	16.231217987877912	16.292293819135377	16.103815330943377
Con_Pmod_vs_Con_Scr	O15047|510	O15047	SETD1A	T	510	FSFLASDTEEEEENS	-0.0596159	13.750853840725068	-1.73178	0.11237337315991434	0.3705484039566618	-5.08163	13.759207477360292	13.688997109118468	13.733267175042412	13.629912067065272	13.714862332156644	13.65784979092257	13.75937612441491	13.814349596669077	13.828213991507136	13.853683486507768	13.799143268190964	13.77138366974529
Con_Pmod_vs_Con_Scr	O15047|916	O15047	SETD1A	T	916	EKRPRPSTPAEEDED	0.0324226	10.119376847510646	0.6574945075492864	0.5249343874082213	0.7677206459917627	-6.26296	10.158760181519138	9.948317618563117	10.107378270413223	10.127822177117713	10.08698127738872	10.096920282323538	10.203387532909408	10.238279852122057	10.142396401278134	10.12591889468884	10.066803509906544	10.12955617189732
Con_Pmod_vs_Con_Scr	O15050|2790	O15050	TRANK1	Y	2790	HQRQQVAYQKYSEFF	0.0556003	13.758886432857755	0.6000745880240245	0.5611118419449801	0.7884475530842812	-6.30016	13.804966382861238	13.454664490921326	13.7859	13.770688046258336	13.755274385986002	13.68632635286257	14.086914844259187	13.886561586092478	13.800947909328878	13.63676763768709	13.70380645057076	13.73386196349079
Con_Pmod_vs_Con_Scr	O15056|1056	O15056	SYNJ2	S	1056	ALAPPSKSPALTKKK	0.024328384239325374	14.740844867335586	0.42007930455017256	0.6828469786853397	0.859924	-6.3959	14.64372821847925	14.577533024535166	14.615291290843412	14.73161473371375	14.509690809387902	14.668232143474157	14.836730307260352	14.676662185970413	14.801352689214411	14.927474349491158	14.995291460494034	14.906537195163027
Con_Pmod_vs_Con_Scr	O15056|1127	O15056	SYNJ2	S	1127	KKSASDASISSGTHG	-0.0557527	16.03775116080486	-1.22611	0.24679620697575896	0.5372212948680769	-5.73879	16.086300314593952	15.92423760613546	16.05525495714404	16.020027265866272	15.911907899268366	15.966599718296086	16.18809346186027	16.109467869348162	16.089549800269555	16.02003204376469	16.035858579159868	16.04568441395158
Con_Pmod_vs_Con_Scr	O15056|1196	O15056	SYNJ2	S	1196	GASEEALSAVAPRDL	0.021331427785218793	12.167243626635628	0.22452521891078506	0.8266335000093035	0.9275409622364864	-6.46261	12.358539308943048	12.119956425795625	12.27477436299071	12.45810829305755	12.033304773683934	12.325851314343543	12.315949393952978	12.179097364343296	12.18526762722199	11.896301684902143	11.921983025278276	11.937789945114432
Con_Pmod_vs_Con_Scr	O15056|1251	O15056	SYNJ2	S	1251	RRTGKPLSPEEQFEQ	0.0365644	13.18441535624942	0.8514487582055542	0.4134109007510324	0.6853960445540558	-6.1147	13.09603248400619	13.006316996542552	13.105338008302075	13.129857293273854	13.099284920240104	13.088238523515916	13.396794824792789	13.325605347902622	13.24708655753756	13.194056900506036	13.23347615238458	13.290896265988764
Con_Pmod_vs_Con_Scr	O15056|1433	O15056	SYNJ2	S	1433	NNTWLSKSSDPLDSG	-0.166873	20.418864980686042	-3.64364	0.0041259	0.0665104	-1.9459	20.475039128234325	20.604798480060044	20.52775983598211	20.32649180488502	20.426633428589025	20.35385203825976	20.246007773305266	20.147075400007985	20.26118072529937	20.52961299454497	20.61160763626182	20.516320522802797
Con_Pmod_vs_Con_Scr	O15061|1044	O15061	SYNM	S	1044	ESLSRQRSPAPGSPD	-0.0588491	15.236357548287547	-0.986338	0.3460266403382616	0.6283603869122373	-5.99217	15.058182497611565	14.89411693741316	15.039942113839643	15.018539506115223	14.858974353256722	14.93818036653714	15.629332231662591	15.50705552323441	15.450844620657826	15.432177708092045	15.48208788770324	15.526856833326988
Con_Pmod_vs_Con_Scr	O15061|1044;1049	O15061	SYNM	S;S	1044;1049	ESLSRQRSPAPGSPD;QRSPAPGSPDEEGGA	-0.0376724	13.283030948072081	-0.487196	0.6360740846357121	0.8342784098958068	-6.36397	13.122657830418872	12.865050017594893	13.023795548427705	13.081391067014977	12.814344550135878	13.002750594330296	13.58989216869928	13.665841206276578	13.531703075153292	13.592118045625318	13.494771575203664	13.61205569798423
Con_Pmod_vs_Con_Scr	O15061|1049	O15061	SYNM	S	1049	QRSPAPGSPDEEGGA	0.038646	14.163769465074745	1.0011347339162944	0.3391489055945158	0.6235089616764317	-5.97781	13.958479739409816	13.871549560484649	13.94656061590494	13.987410705414302	13.943871639192569	13.961245465352842	14.44354461668845	14.31766728592912	14.407772974659313	14.37026783178518	14.419651326998585	14.337211819077186
Con_Pmod_vs_Con_Scr	O15061|1107	O15061	SYNM	S	1107	SATVEVSSPTGFAQS	0.052084275184801854	12.556745506153234	1.1668225840979118	0.2689544677108876	0.5594603549114014	-5.80541	12.312666423368013	12.331547214841688	12.31797479362891	12.300619835847773	12.46569081340542	12.35213060813982	12.73288076683408	12.862050038702948	12.79181780719721	12.7686	12.70034399199617	12.744607364044072
Con_Pmod_vs_Con_Scr	O15061|653	O15061	SYNM	S	653	ILKQFTQSPETEASA	-0.0255969	16.274769898341795	-0.661732	0.52232	0.7659837038126992	-6.26009	16.02706717304667	15.974020310765432	16.015839619608066	16.019604558088954	15.932236415902745	15.98829557606182	16.582627912795864	16.45882030790418	16.556909051578323	16.57152922023072	16.625235919675983	16.545052714442775
Con_Pmod_vs_Con_Scr	O15062|371	O15062	ZBTB5	S	371	SAEKIDLSPESSDRS	0.014999307456308841	13.224956378810404	0.2967804010733578	0.7723895750453607	0.9017018122047193	-6.44259	13.11580094348843	13.26786371782181	13.188845992018525	13.167978587881713	13.267397427961678	13.182132559854304	13.299676718239043	13.312749711266818	13.207118606037543	13.167692324427922	13.214661848335194	13.307558108391868
Con_Pmod_vs_Con_Scr	O15063|22	O15063	GARRE1	S	22	RRFLLGGSKQKVQQH	0.1618801795064364	17.759114778118455	2.386869907446961	0.0369318	0.2131610236739726	-4.06578	17.591260559189692	17.829097707665607	17.613082310358855	17.796068716722253	17.85883599278116	17.864176406230047	17.65548803772215	17.72929271887199	17.864202361003237	17.809614871761852	17.795162545940705	17.703095109173923
Con_Pmod_vs_Con_Scr	O15063|723	O15063	GARRE1	S	723	GLAPQQQSPKQQQPQ	0.02442	18.831182042371815	0.9261366301176183	0.375055	0.6539930815990285	-6.04874	18.701986627750426	18.69088825115575	18.70410560146825	18.726450503484873	18.723830836572812	18.719959219006185	18.929042748183175	18.963311510304543	18.891351699407046	18.963974754391227	18.94971246659776	19.009570290139724
Con_Pmod_vs_Con_Scr	O15066|485	O15066	KIF3B	T	485	GKNIVDHTNEQQKIL	-0.0071256	11.427703816508455	-0.100558	0.9217852935439733	0.9697733569592426	-6.4841	11.302669149574047	11.170928352357476	11.339425484922677	11.287494374521703	11.282682308845382	11.22146948928208	11.613428680314763	11.442953089845364	11.334977173919308	11.61979628373104	11.72241345878329	11.794207952004324
Con_Pmod_vs_Con_Scr	O15069|1068	O15069	NACAD	S	1068	GDGAKPDSPQKETLE	-0.0951039	16.687708946316086	-1.18162	0.2632823015597952	0.5545010169714927	-5.78902	16.576645819969343	16.589999414370606	16.610805720346026	16.44315724863149	16.580704266429464	16.468277614635745	16.70006339901518	16.44556405110176	16.736528598656644	17.033231329356823	17.165476180081853	16.9021
Con_Pmod_vs_Con_Scr	O15069|1121	O15069	NACAD	S	1121	VSQARLLSPAREERG	-0.042781	13.90372672668217	-0.602983	0.5592465495543942	0.7872511948510189	-6.29835	13.897030664947248	13.8057	13.899858946298842	13.934928213080177	13.702684926907796	13.836586361497275	13.96138343403926	13.726122503958033	13.768573736915084	14.027607319097845	14.154026678921246	14.130264949517716
Con_Pmod_vs_Con_Scr	O15069|1303	O15069	NACAD	S	1303	RVSLSPHSPLLSPKV	-0.0719301	16.869810444548634	-2.04084	0.0670659	0.2891148320701027	-4.61914	16.845221289395617	16.802870236750287	16.85060879247203	16.70529039428332	16.843969289262773	16.73365028436183	16.85836585245042	16.853363164737328	16.87148474476735	17.04064152535947	17.034220612632126	16.998039148111065
Con_Pmod_vs_Con_Scr	O15069|1303;1307	O15069	NACAD	S;S	1303;1307	RVSLSPHSPLLSPKV;SPHSPLLSPKVASMD	0.017029977276791897	15.397837487269882	0.3320876254001716	0.746321	0.8882427049850244	-6.43083	15.25255700578858	15.409162466146434	15.327613335476178	15.312308595509617	15.404304374829431	15.323809768902514	15.324213148367214	15.331155751448716	15.225322127660112	15.55504513617894	15.607140881508784	15.701417255422069
Con_Pmod_vs_Con_Scr	O15069|406	O15069	NACAD	S	406	ADDERLYSGEPHAQA	0.1229229086183885	15.450968207631346	2.9723827284030486	0.013224972480655944	0.12229452839514063	-3.08394	15.470923482426546	15.365538591505077	15.443741002313889	15.556374359761522	15.548109199730336	15.544488242608828	15.258903704594864	15.349940073931856	15.21671505422466	15.561720140805075	15.496201513188756	15.598963126484756
Con_Pmod_vs_Con_Scr	O15075:Q8N568|298:308	O15075:Q8N568	DCLK1:DCLK2	S	298:308	SRRSTTKSPGPSRRS:VKYSGSKSPGPSRRS	-0.186634	16.890294836889744	-2.21326	0.0499098	0.24861079946302692	-4.34716	16.773227119206233	16.594464044213638	16.803913047199707	16.408521785249143	16.757200312165004	16.445979646505513	16.988225984403503	16.929251536042237	16.867448661647032	17.364677243804607	17.380637213655838	17.36999144858447
Con_Pmod_vs_Con_Scr	O15079|49	O15079	SNPH	S	49	SYKGSDSSPTPRRSM	0.15505228313048747	17.259626786531907	3.4935526265317787	0.00533734	0.0754886	-2.19876	17.240006370555687	17.045316058639543	17.17771370197009	17.33137147684748	17.284028577009796	17.31279292669952	17.207394717685588	17.202040178220933	17.22728077154444	17.40669217676389	17.358732440867314	17.322152041578587
Con_Pmod_vs_Con_Scr	O15084|1011	O15084	ANKRD28	S	1011	TNTSKTVSFEALPIM	-0.135542	14.600015123102043	-2.68073	0.022075801458178657	0.1609058968790493	-3.57737	14.661303564092236	14.746921855659462	14.634517815371105	14.583846294240512	14.463884711896272	14.588386725053123	14.556028347659437	14.715889184922162	14.653694394050518	14.559665767607845	14.47838042288712	14.55766239378472
Con_Pmod_vs_Con_Scr	O15085|1295	O15085	ARHGEF11	S	1295	LPPRTRNSGIWESPE	-0.0197206	16.113606918825454	-0.782992	0.4508339754705022	0.7138756848111463	-6.17091	16.171064612771406	16.157134609298698	16.1815	16.150569296995883	16.159066164918098	16.140865875913317	16.048427492603746	16.03991266866434	15.990926200821503	16.088111392316762	16.09885675350715	16.136883917152844
Con_Pmod_vs_Con_Scr	O15085|1458	O15085	ARHGEF11	S	1458	KSLGGESSGGTTPVG	0.18602061830739025	15.513534169151688	6.746778012781593	3.877841518688468e-5	0.00749998	2.62366	15.412521145817248	15.368655473209904	15.401506057796976	15.616172182670464	15.536757624199849	15.587814724875988	15.53394943644376	15.506979556057374	15.489210028980043	15.557344900903514	15.566378150463272	15.585120748401858
Con_Pmod_vs_Con_Scr	O15085|1480	O15085	ARHGEF11	S	1480	RWTDGSLSPPAKEPL	0.0032069	13.346134784726845	0.0362858	0.9717312348597619	0.9894343922236837	-6.48881	13.233553165818504	13.372252243640848	13.253783764965837	13.185423858161093	13.40421104993652	13.27957495536344	13.254703912468251	13.209829097905722	13.490132933015552	13.556684644314736	13.57935349598459	13.33411429514705
Con_Pmod_vs_Con_Scr	O15085|245	O15085	ARHGEF11	S	245	MNRNSVLSDPGLDSP	0.00407217	15.186307340057672	0.0661301	0.948509	0.9794824709957746	-6.48717	15.135084987266456	15.093322989908255	15.140197303381624	15.217262101333423	15.023834177776818	15.139725509522606	15.3413	15.291509663851924	15.15838446529076	15.161493032280744	15.202885339592893	15.330727317878464
Con_Pmod_vs_Con_Scr	O15085|271	O15085	ARHGEF11	S	271	QHHRRQGSDAAVPST	6.840740500493325e-4	17.307661374266594	0.022227662915629987	0.9826807601466905	0.9934430599629557	-6.48925	17.297087146143518	17.34358802186021	17.319307710146525	17.28455650634531	17.3699	17.30762561193189	17.266012874197113	17.226631052745546	17.289129941096608	17.328962265099744	17.358625242172145	17.300557137437316
Con_Pmod_vs_Con_Scr	O15085|35	O15085	ARHGEF11	S	35	PSHHRQPSDASETTG	-0.0163632	16.43234202671778	-0.209142	0.8383167784869286	0.9327978990160548	-6.46616	16.340533439276093	16.685561264999073	16.408812729055033	16.3874	16.52746979038597	16.470967222251534	16.370884196633387	16.502665016991337	16.525133222287472	16.32656893302181	16.318359145327285	16.323768401821383
Con_Pmod_vs_Con_Scr	O15085|556	O15085	ARHGEF11	S	556	STFHIPLSPVEVKPG	0.0356764	15.922206532041535	0.4814983504482599	0.6399845768623842	0.8369955825407184	-6.36686	15.731559096185494	16.068850524448536	15.80870424343969	15.846186028678137	15.958681799934585	15.911275343335555	15.78364832997785	15.91534007235568	15.869028467116436	16.035600063619412	16.0363	16.101330808216943
Con_Pmod_vs_Con_Scr	O15085|635	O15085	ARHGEF11	S	635	ENVPRSRSDVDMDAA	0.00545922	15.87404414392192	0.15202008766055405	0.882036	0.9526945082777973	-6.47716	15.931703499088078	15.8353	15.88769493727292	15.88228927664336	15.89405059903774	15.894781384442208	15.855328633356844	15.883940482312363	15.938314779946063	15.881223023712217	15.830083979647071	15.773773977651963
Con_Pmod_vs_Con_Scr	O15085|663	O15085	ARHGEF11	S	663	TSSLSTRSLENPTPP	0.035575386214171445	11.236729545890961	1.0733485007855204	0.30702869375672687	0.5952965272603987	-5.90526	11.148159615538502	11.22234138818315	11.152090784787632	11.24230942797744	11.155797224398263	11.231211294776088	11.2832	11.328902082917022	11.285243754258572	11.250846767881889	11.2425	11.29820950649927
Con_Pmod_vs_Con_Scr	O15085|668	O15085	ARHGEF11	T	668	TRSLENPTPPFTPKM	-0.0491144	10.577097558195723	-1.02816	0.326847	0.6138183661735658	-5.95114	10.4581	10.577173388468845	10.516400698623205	10.489725215964896	10.451129109601393	10.463513023967971	10.746048963406418	10.699338698643714	10.613852631540803	10.558578086848302	10.631959742045176	10.71931452835825
Con_Pmod_vs_Con_Scr	O15111|473	O15111	CHUK	S	473	KNTLISASQQLKAKL	0.17652327970933968	17.346146512115848	1.8913567042250699	0.0863015	0.3251085038589381	-4.84738	19.39759502306714	19.266923399935585	19.297633303419033	19.440238850481517	19.536271403442942	19.51521131162533	14.791784343557763	14.896975387597251	15.120612087464105	15.79141226405402	15.653972257607403	15.4451
Con_Pmod_vs_Con_Scr	O15119|707	O15119	TBX3	S	707	SSSSMSLSPKLCAEK	0.00817933	12.596580739721674	0.14650327589056142	0.8862832259526939	0.95414	-6.47804	12.189726335485927	12.130876683071824	12.218820189370772	12.235619825276292	12.155178704553409	12.173162664689414	13.214160977903257	13.00176400689184	13.028729040768312	12.862124925424151	12.986766207982956	12.96203931524192
Con_Pmod_vs_Con_Scr	O15127|320	O15127	SCAMP2	S	320	TFHRAASSAAQGAFQ	-0.0309165	16.921622311654986	-0.569095	0.5811930778465325	0.799718	-6.31891	17.012171468654262	16.872011975725002	16.976420421769777	16.994942753469566	16.83879765391945	16.93411390814071	17.0345	17.052298452200557	16.919858549135448	16.78840440096455	16.761003819843463	16.874964215638432
Con_Pmod_vs_Con_Scr	O15143:A0A1W2PNV4|311:643	O15143:A0A1W2PNV4	ARPC1B:NA	S	311:643	NLDKKASSEGGTAAG:NLDKKASSEGGTAAG	0.14216522934633957	16.026520228997885	2.382572298157452	0.0372094	0.21382829674918657	-4.07282	15.815010586526755	15.883802566853896	15.823459691731848	15.932019664114934	16.03686146502531	15.979887404011269	16.014569649208653	15.943374863416528	16.15387264302706	16.283895389468743	16.316703293598458	16.134785530991167
Con_Pmod_vs_Con_Scr	O15143|364	O15143	ARPC1B	S	364	WDVKSLESALKDLKI	0.14532098722228248	14.665601696365169	1.737053807565293	0.11140881036006259	0.36869997172096336	-5.07406	14.617108423051183	14.589222796522336	14.621860801195856	14.864758627187362	14.624621187882529	14.77477516736633	14.773387941298685	14.799615238651905	14.552254682483484	14.505564664590796	14.51609822269156	14.747952603459987
Con_Pmod_vs_Con_Scr	O15144|235	O15144	ARPC2	S	235	FPRHTNASARDNTIN	0.15920248215295274	13.287460467723847	3.3520256112689606	0.00681639	0.0870551	-2.43844	13.153983678892642	13.214616221894206	13.222040374316324	13.309917536596496	13.442405685508822	13.315924499456717	13.354179400933797	13.225455683290075	13.242873536435432	13.263335059843245	13.365849456956752	13.33894447856166
Con_Pmod_vs_Con_Scr	O15145|172	O15145	ARPC3	S	172	KRQFMNKSLSGPGQ_	-0.0941958	15.145882726064329	-2.0491	0.0661295	0.28743973090657743	-4.60631	15.19371821878922	15.184743945708975	15.149243729352772	15.159707329083115	14.957145593286544	15.128265568341511	15.11577377915194	15.14198421075526	15.172702323500912	15.202931411904334	15.173138996653329	15.17123760624404
Con_Pmod_vs_Con_Scr	O15145|174	O15145	ARPC3	S	174	QFMNKSLSGPGQ___	0.1542265920759327	10.453615425750186	4.971390752747334	4.759192841109084e-4	0.0233537	0.18361407065424995	10.21886027635618	10.244222428504797	10.196560660272969	10.399675351026518	10.322747704083415	10.399900086251806	10.656618798366226	10.691138910077957	10.730653069795329	10.55159184409946	10.525784024953737	10.50563195521384
Con_Pmod_vs_Con_Scr	O15155|50	O15155	BET1	S	50	VTAIKSLSIEIGHEV	0.0840628	14.14035294005188	1.488822463368051	0.16577742165351436	0.44604303496101955	-5.41556	14.064520243677311	14.12788705552617	14.085953958031396	14.107745172951894	14.263206759540031	14.159597794334598	14.042584546687053	13.971175744249182	14.147082149288618	14.265714342026616	14.30424186176968	14.144525652540011
Con_Pmod_vs_Con_Scr	O15164|744	O15164	TRIM24	S	744	VVIVKQESDEESRPQ	-2.79305e-05	13.449017439414446	-0.00049773	0.9996121460136599	0.9999896737202669	-6.48951	13.431391188141337	13.50835413395414	13.494688871555722	13.41675110023986	13.57656692795432	13.441032374092718	13.470593600921289	13.30206675598909	13.433753746359752	13.402210998571906	13.5176	13.393169040752316
Con_Pmod_vs_Con_Scr	O15164|811	O15164	TRIM24	S	811	WLDPSQKSPLHVGET	-0.0929655	15.770505356101095	-1.31193	0.21734510488606795	0.5075850386647458	-5.63804	15.850026265904694	15.890962526867428	15.888968562138876	15.725444020624389	15.869907840865734	15.755709045723734	15.668188584420358	15.45817152941109	15.705256251920206	15.808461325646856	15.92429012117564	15.700678198514147
Con_Pmod_vs_Con_Scr	O15169|217	O15169	AXIN1	S	217	YTRTGSESPKVCSDQ	-0.0662337	16.045982221431448	-2.38012	0.0373685	0.21427657947839635	-4.07684	16.087230210166314	16.04410771807767	16.08048032669781	15.990488883382584	16.026272702088743	15.996355422246792	15.977175840281175	15.932738217326428	15.993889759015213	16.154092006671927	16.164931844628867	16.10402372659384
Con_Pmod_vs_Con_Scr	O15169|481	O15169	AXIN1	T	481	HVQRVLRTPGRQSPG	0.010216421589931635	7.9605300910610675	0.11844787384171276	0.9079356820728157	0.964179	-6.48201	7.826627010312202	7.777326727897411	7.869606079930019	7.830193051218369	7.879284745612112	7.794731286078947	8.166462880530585	8.236306860071355	7.910607806813188	7.994341638630719	7.989620593139842	8.251252412498065
Con_Pmod_vs_Con_Scr	O15169|493	O15169	AXIN1	S	493	SPGPGHRSPDSGHVA	-0.0490636	13.56262764375385	-0.982712	0.34772754213711965	0.6298536413077245	-5.99566	13.507256429974888	13.627484611555287	13.521105440710825	13.503268708340514	13.487824586812955	13.51756241281478	13.602633835396674	13.760634291377285	13.6214	13.527001865190924	13.470321828868595	13.605006799932376
Con_Pmod_vs_Con_Scr	O15173|104	O15173	PGRMC2	S	104	RMKKRDFSLEQLRQY	0.1525037230210664	9.453883146249005	1.8845702104758637	0.0872862	0.3274226876950444	-4.85756	9.232902810565808	9.038393404227929	9.156464142420509	9.37629	9.188722359714973	9.32025	9.672872597919106	9.8577	9.60082	9.683919340741037	9.54932	9.76893
Con_Pmod_vs_Con_Scr	O15173|210	O15173	PGRMC2	Y	210	PGEEPSEYTDEEDTK	-0.116656	24.079818631486518	-0.689806	0.505192	0.7549169207309063	-6.24065	24.26416284889859	24.259032701969687	24.339847247972763	24.06987024311271	24.33859674118489	24.104608102547083	23.647445669701128	23.056211008012166	23.671496028351072	24.383713477461622	24.69111593694339	24.131723571683107
Con_Pmod_vs_Con_Scr	O15173|211	O15173	PGRMC2	T	211	GEEPSEYTDEEDTKD	-0.013019	22.989222149815415	-0.25444	0.8040422428861586	0.9169207435073256	-6.45498	23.10479368511292	23.09285689661099	23.10291576731028	23.04132401987954	23.14535550706675	23.074829727689128	22.767150979844747	22.684909175621556	22.85747066646993	23.034548378316572	23.061889481871304	22.902621511991285
Con_Pmod_vs_Con_Scr	O15173|90	O15173	PGRMC2	S	90	GAGAGEESPATSLPR	-0.128521	17.04422297035239	-4.37193	0.00122615	0.0372931	-0.749555	17.01925748904327	17.090794669769522	17.050523424058838	16.92236172739655	16.931495483203676	16.92115546460373	17.02499057438984	16.950491894885506	17.00050337700952	17.178741541334997	17.23861332454233	17.201746673990918
Con_Pmod_vs_Con_Scr	O15209|599	O15209	ZBTB22	S	599	SPGVGGGSGDEASAA	0.023293281785647935	13.59747552966662	0.4769643866180747	0.643105	0.8384942904125113	-6.36913	13.502015963743014	13.49884886726958	13.515809452245156	13.594041810853811	13.45274505927526	13.539767258485607	13.730340327909804	13.553143005708431	13.634144543955038	13.665754649295252	13.769331412003092	13.713764005255388
Con_Pmod_vs_Con_Scr	O15211|409	O15211	RGL2	S	409	VQEVKLQSPLEPHSK	-0.00271799	17.1103	-0.0405035	0.9684472498908596	0.9878046358924668	-6.48863	16.897125204123256	17.166787829804907	16.93505158592887	17.01367065737488	16.944046800998297	17.03309317786866	17.25300796139638	17.40032327740202	17.314516797520625	17.100389624742817	17.07654762940159	17.189091186691687
Con_Pmod_vs_Con_Scr	O15226|429	O15226	NKRF	S	429	SQCHTGSSPRGSGKK	0.00465314	12.67751118091145	0.10679654366236599	0.9169520951001222	0.9672181281222321	-6.48341	12.64211410131905	12.70109360354128	12.619339491121004	12.716222869681484	12.55908571949641	12.7012	12.629662274710563	12.63104580672814	12.708011735711857	12.755941807201625	12.752730504790575	12.713688242424023
Con_Pmod_vs_Con_Scr	O15226|618	O15226	NKRF	S	618	RNYARSESHTDLTFS	0.048299780650239654	12.07265643431492	0.8201203654378321	0.43026951230588917	0.6978200715613389	-6.14094	11.956801751380617	11.951825386213113	11.940425331204988	12.041649410753546	11.93588216418772	12.016420235808171	12.202212931730095	12.358776930546904	12.148496593921957	12.093440411810276	12.01750716086843	12.20843890335322
Con_Pmod_vs_Con_Scr	O15231|158	O15231	ZNF185	T	158	RSSTSGDTEEEEEEE	0.0719596	12.523304651678927	2.0958839430145377	0.061057952505922705	0.27671037273938254	-4.53324	12.224011959405468	12.180346139189764	12.222268008110854	12.314639028589571	12.24618182491646	12.281684199429948	12.79432084868382	12.789298775615356	12.705684381695695	12.812681744821544	12.817863125879889	12.890675783808762
Con_Pmod_vs_Con_Scr	O15231|447	O15231	ZNF185	T	447	QQPADPSTPERQSSP	0.0269408	13.722939714622072	1.0211053507580174	0.3300267563968713	0.616439	-5.95816	13.34213023505158	13.40988961939619	13.35327621022845	13.382061623443342	13.40477910726761	13.399277741375007	14.00329519561523	14.007324105603203	14.048893225477494	14.113343915667684	14.120425017406408	14.090580578932675
Con_Pmod_vs_Con_Scr	O15231|453	O15231	ZNF185	S	453	STPERQSSPSGSEQL	0.0200476	14.94658316628381	0.5032934241810558	0.6250894496370132	0.827293	-6.35564	14.41057435714608	14.561780693345543	14.449671725869534	14.447945106506673	14.545213990751746	14.48901050971341	15.334566760998138	15.368827661468863	15.390767078620026	15.450203548470292	15.461485796574973	15.448950765940454
Con_Pmod_vs_Con_Scr	O15231|455	O15231	ZNF185	S	455	PERQSSPSGSEQLVR	-0.00292756	9.006654885841822	-0.0645962	0.9497020361612667	0.9799558462520537	-6.48728	8.44126	8.5832	8.5166	8.476704109232545	8.569736827093411	8.485834597148399	9.481156423296694	9.407585769468788	9.392057630144793	9.510963459767655	9.599694690293877	9.615066919217035
Con_Pmod_vs_Con_Scr	O15231|465	O15231	ZNF185	S	465	EQLVRRESCGSSVLT	-0.113979	12.271473473516295	-1.71274	0.1159218015969606	0.377264	-5.10885	11.932688617387145	12.107439999621736	11.927399582703003	11.872414384133489	11.83821629615965	11.914961995794126	12.514140051293946	12.536863396897267	12.726728700556135	12.677696112173049	12.671791593534897	12.537340951941102
Con_Pmod_vs_Con_Scr	O15231|519	O15231	ZNF185	S	519	STPEQQNSPSGSEQF	0.15988462005188708	9.189246181156442	3.498520742432765	0.00529187	0.0751912	-2.19037	8.873927165697122	8.885635706846056	8.924457204523588	9.06004	9.07438	9.029255113048926	9.520581212643766	9.36091	9.365148337900091	9.32062	9.432027042134504	9.423973719750116
Con_Pmod_vs_Con_Scr	O15231|531	O15231	ZNF185	S	531	EQFVRRESCTSRVRS	-0.103363	12.792539477935273	-1.60153	0.13872180669871523	0.41068249506718985	-5.26439	12.4665	12.70749212814104	12.477303961128197	12.45097297560877	12.398710733657063	12.49149161271862	13.067810501648614	13.165620688479208	13.249180248304874	13.039611122977558	13.01529743263655	12.98051462816699
Con_Pmod_vs_Con_Scr	O15231|64	O15231	ZNF185	S	64	SGRSRATSFSSAGEV	-0.0516891	18.663630079680495	-0.644615	0.5329285141225809	0.7725027530039238	-6.27157	18.471581923822733	18.60149935453087	18.47824371778034	18.40744863824325	18.52037442181132	18.46843465407503	18.908951364652303	19.23256344378534	18.99699142315312	18.656546685405324	18.50797563543118	18.712949693475142
Con_Pmod_vs_Con_Scr	O15234|10	O15234	CASC3	S	10	DRRRQRASQDTEDEE	-0.00761513	11.83399794348548	-0.149567	0.8839244148207588	0.9532826679541244	-6.47756	11.657728950614308	11.59445975965778	11.679985415124088	11.58436255675256	11.730785549535142	11.59418061573239	12.019979717549507	12.063966537519972	11.91558456167722	12.033695003901332	12.016410660473907	12.11683599328755
Con_Pmod_vs_Con_Scr	O15234|117	O15234	CASC3	S	117	NSKVELKSEANDAVN	-0.0484907	13.514726397293378	-0.922506	0.3768594891036965	0.6551488550202547	-6.05205	13.505238027842756	13.664135518358822	13.556627518822127	13.573567715052697	13.46541532196705	13.541545880367256	13.568093095849672	13.540653029935752	13.466070557050651	13.357146711063704	13.423456435818524	13.514766955391533
Con_Pmod_vs_Con_Scr	O15234|148	O15234	CASC3	S	148	TVTGERQSGDGQEST	-0.000790218	16.889039967303912	-0.0186122	0.9854974106513851	0.9944872946937208	-6.48932	16.87982295468536	16.77142664816407	16.854028389479218	16.836951310821256	16.836376068024297	16.829579958855383	16.95251771374122	16.8524	16.973346480671765	16.983875590349392	17.00649632480858	16.891657853626604
Con_Pmod_vs_Con_Scr	O15234|363	O15234	CASC3	S	363	QTSVRDPSPEADAPV	-0.0051168	18.978666607874764	-0.243748	0.8120964818465615	0.9218845511158077	-6.45782	18.953878578169697	18.97892012409507	18.954959982157483	18.957974824702305	18.952316843916403	18.962116615889716	19.039052745035193	19.050695518610578	19.05742813406595	18.94834215949185	18.945120592477164	18.943193175885774
Con_Pmod_vs_Con_Scr	O15234|66	O15234	CASC3	S	66	LHLRRVESGGAKSAE	0.015361301654337467	14.1327	0.2647765536480984	0.7962780078484362	0.9136668179073004	-6.45213	14.024913634861994	14.06575040085288	14.039817887281997	14.023555842976942	14.102023420067356	14.050986564915585	14.124495506201992	13.986905835339329	14.205462083047571	14.339867123858705	14.40939369703566	14.219166965030784
Con_Pmod_vs_Con_Scr	O15258|95	O15258	RER1	S	95	DPSLMEDSDDGPSLP	0.0592832	17.278706503547482	1.6649380817367287	0.12527601329455967	0.39315763722851926	-5.17644	17.4014	17.303228195176512	17.402115981739865	17.435330010108185	17.439132150117153	17.41017725031416	17.215114138525323	17.11629994445028	17.12721151665282	17.144135269810565	17.18648201295118	17.163805989602757
Con_Pmod_vs_Con_Scr	O15318|157	O15318	POLR3G	S	157	KRGDGEKSDEENEEK	-0.026973	16.81353008737305	-0.789025	0.44744935913541317	0.7114471487499756	-6.16612	17.11058712659665	17.18461414371833	17.126926205826884	17.072669805862574	17.160247717793776	17.10829083602392	16.36085212877499	16.36447940239506	16.43191891386182	16.629311923319698	16.635416878028558	16.577045966274326
Con_Pmod_vs_Con_Scr	O15327|487	O15327	INPP4B	S	487	GILKKPPSPKSSTEE	-0.151425	17.053724871292033	-5.57844	1.922490284625746e-4	0.015105280807773718	1.0730948984911253	17.074151037856716	17.14994015640405	17.096381501148958	16.943017994961668	16.96833099642469	16.95484811609303	17.15831321004793	17.12767453539126	17.176144274792527	16.98955003282269	17.021129977539992	16.985216622020904
Con_Pmod_vs_Con_Scr	O15344|92	O15344	MID1	S	92	RFQKASVSGPNSPSE	-0.0033139	14.82194059308598	-0.101319	0.921195	0.9696015699146122	-6.48402	15.039253110437354	15.010994367417974	15.041308457635449	15.05293367741818	15.002076879517215	15.026603678562108	14.70022698056258	14.707970216722726	14.619820670295937	14.527671808745971	14.528965176911411	14.60546209280486
Con_Pmod_vs_Con_Scr	O15344|92;96	O15344	MID1	S;S	92;96	RFQKASVSGPNSPSE;ASVSGPNSPSETRRE	-0.026577	19.2224	-0.862725	0.4074539849319536	0.6811540781537219	-6.10505	19.463496858367883	19.42625644292663	19.453721592680267	19.435356051808977	19.40393405109988	19.42445364279201	19.032269043837346	18.95290708366515	19.03964493120066	19.01688054228181	19.0472	18.972678169283483
Con_Pmod_vs_Con_Scr	O15344|96	O15344	MID1	S	96	ASVSGPNSPSETRRE	-0.0668446	17.230144908989022	-2.53959	0.028279524892239474	0.18361521326982835	-3.81348	17.388255057985784	17.39862093242868	17.398994455261708	17.350345927600074	17.304104354075392	17.33088641283243	17.07019787446295	17.000326601937093	17.02806924998813	17.140395173099268	17.184913357935073	17.166629510261668
Con_Pmod_vs_Con_Scr	O15344|98	O15344	MID1	S	98	VSGPNSPSETRRERA	0.0444216	14.627610929893905	0.9718037821736276	0.35288070900513213	0.6352989515333743	-6.0061	14.921419410636751	14.802223901386684	14.857167931825607	14.910809725174284	14.884494649821796	14.918771520908532	14.289024683956004	14.441407003961038	14.36943635414677	14.441631879588162	14.320465268219014	14.374478829102216
Con_Pmod_vs_Con_Scr	O15355|183	O15355	PPM1G	S	183	GTGEEPGSQGLNGEA	-0.0651734	10.395892448349802	-2.39552	0.0363792	0.211358	-4.0516	10.386686801861536	10.449219965968515	10.413285809665446	10.3192	10.395011060607692	10.339465867224064	10.411935682091944	10.402978466026116	10.417592242142169	10.396399368955072	10.41676681229952	10.40217192971375
Con_Pmod_vs_Con_Scr	O15357|132	O15357	INPPL1	S	132	PPDDRDASDGEDEKP	-0.0674326	16.117182759927896	-2.68774	0.021805820091145036	0.15973186748230547	-3.5656	16.22051081975521	16.260685173734352	16.216742638733656	16.160144992180022	16.16156294196207	16.173932803330388	15.93444909365354	15.99249847806912	15.98236204323134	16.11530452320404	16.086951979134287	16.101047632146717
Con_Pmod_vs_Con_Scr	O15371|161	O15371	EIF3D	S	161	SQKPRDSSVEVRSDW	-0.0100649	14.518559338644899	-0.338829	0.7413797494611201	0.8854698419188188	-6.42843	14.505066985532713	14.513503798603796	14.488022614033513	14.475414023908977	14.502313852578844	14.49867069518124	14.573330687214066	14.669496088655176	14.646546355927756	14.483168945210462	14.423944184998852	14.4432
Con_Pmod_vs_Con_Scr	O15372|183	O15372	EIF3H	S	183	VCKEKDFSPEALKKA	-0.0243561	16.447896396848243	-0.645488	0.5323848374322784	0.7725027530039238	-6.271	16.35536368556278	16.432040811378187	16.393291507769202	16.402187029199684	16.33342022759718	16.372020395857888	16.587619654476832	16.499569637573064	16.49302867147787	16.44365182140483	16.521479680993433	16.541083638887958
Con_Pmod_vs_Con_Scr	O15381|20;22;23	O15381	NVL	Y;T;S	20;22;23	LKQRVIQYLTSNKCG;QRVIQYLTSNKCGKY;RVIQYLTSNKCGKYV	-0.0456462	14.144399069392547	-1.77951	0.10390872677207158	0.3559811039167778	-5.01269	14.324446274405847	14.28642759328075	14.330145408574143	14.274041556371118	14.271156969108894	14.258882031633076	13.98241372740006	13.919693825754962	13.928882325185112	14.035122998227925	14.067298209231758	14.054277913536907
Con_Pmod_vs_Con_Scr	O15394|33	O15394	NCAM2	S	33	SLSKVELSVGESKFF	0.0514406	14.509517695532947	0.7128228458530971	0.49140578311400496	0.7449817775473602	-6.22417	14.425217787517388	14.292491316534711	14.395417979574448	14.465076980569956	14.380472631118366	14.421899369535392	14.692998445013815	14.833777755267302	14.561973448951328	14.529810498751432	14.44483599030582	14.670240143255414
Con_Pmod_vs_Con_Scr	O15400|129	O15400	STX7	S	129	VRASSRVSGSFPEDS	-0.00862565	14.444075322786153	-0.208642	0.8386970834137233	0.9330370023527554	-6.46627	14.464627580195495	14.493687957851607	14.436305136799152	14.437447909088302	14.458495158732177	14.472800657203214	14.200769885407317	14.357244707410464	14.32714165254984	14.613181850456073	14.51874665039538	14.548454727344826
Con_Pmod_vs_Con_Scr	O15400|131	O15400	STX7	S	131	ASSRVSGSFPEDSSK	0.0596261	17.461476804633566	1.0939291114716334	0.2983099031341375	0.58754	-5.88384	17.475578566694853	17.661267332622803	17.52848395783862	17.58324280542002	17.649992509897135	17.61097292078795	17.239986066564764	17.357912379862885	17.225054685961336	17.3684	17.35554220762858	17.481275698426863
Con_Pmod_vs_Con_Scr	O15400|136	O15400	STX7	S	136	SGSFPEDSSKERNLV	0.037985	15.82140062976559	0.835924	0.4217087055844494	0.6919272733020176	-6.12781	15.766393111286984	15.947104913164525	15.820426494329514	15.833479936729695	15.941098284307207	15.87330137582709	15.673199034615651	15.73208511028442	15.694217028914087	15.837510770212935	15.849085800929489	15.888905696585487
Con_Pmod_vs_Con_Scr	O15400|205	O15400	STX7	S	205	EQGDVIDSIEANVEN	0.0273502	15.156578936344374	0.6679754017622203	0.5184811423977594	0.7628202607617799	-6.25583	15.038647695249631	15.174458496113632	15.070693514046033	15.078241142726563	15.16992010198149	15.117688922218562	15.142789123522649	15.23921283720676	15.186948750201262	15.218679369987088	15.195937972606927	15.245729310271887
Con_Pmod_vs_Con_Scr	O15400|45	O15400	STX7	S	45	QLGTPQDSPELRQQL	-0.0494463	15.697991204753343	-0.628422	0.5430792171156442	0.77801	-6.28219	15.5287	15.650366062570372	15.573881420155791	15.379506527210085	15.736848146694973	15.488233936941374	15.816036029875749	15.984541025136128	15.926475785677624	15.801374647356166	15.733213620183673	15.75673712444488
Con_Pmod_vs_Con_Scr	O15400|79	O15400	STX7	T	79	EFGSLPTTPSEQRQR	-0.0127009	17.564370512351086	-0.35439	0.7300212464425874	0.8805376691152751	-6.42273	17.58116030432995	17.53302545255855	17.55945531794203	17.4997	17.60056271414039	17.53524751801229	17.553205111598444	17.62192125877911	17.63509771851188	17.598576519761302	17.540396776492038	17.514069331776657
Con_Pmod_vs_Con_Scr	O15417|1359	O15417	TNRC18	S	1359	PQARPLPSPGAAGAQ	0.0766491	12.927440077792472	1.7611017465801067	0.10710218589402495	0.36077843697978573	-5.0394	12.929808176919426	12.75494071140764	12.87089048482838	12.92425376964596	12.934733007103558	12.926600007796148	12.950247198958584	12.971675883037465	13.006766284144245	13.010577621211048	12.948785839954208	12.900001948503004
Con_Pmod_vs_Con_Scr	O15417|1857	O15417	TNRC18	S	1857	GARERALSPGLEESG	-0.101421	12.786170796609404	-2.04517	0.0665734	0.2878528178088349	-4.61242	12.90745702339762	12.841886454815192	12.840167985036144	12.836273651664923	12.640241821666512	12.808733998822865	12.821960288618026	12.902034105737748	12.899953304827854	12.688145960087464	12.613658325545249	12.63353663909326
Con_Pmod_vs_Con_Scr	O15417|2543	O15417	TNRC18	S	2543	EDSGNPKSPDKAQAE	0.00998934	10.826306873668145	0.2084880372468306	0.8388144020394053	0.9330370023527554	-6.4663	10.891826738228977	10.681001755127202	10.832624972883522	10.853660604557971	10.766814478548495	10.814946393809851	10.953560251473478	10.9585	10.909722916228551	10.773327742274532	10.725743900265565	10.7539
Con_Pmod_vs_Con_Scr	O15417|263	O15417	TNRC18	S	263	PRLAERLSPFLAESK	-0.0314605	12.875397475153122	-0.458434	0.6559302763184685	0.845948	-6.37821	12.906026406198508	12.792042443925292	12.899896590985184	12.89448955236442	12.779603315412034	12.829491024097573	13.019386256078846	13.048563280670928	12.821399642446726	12.782544748755049	12.770158304306882	12.961168136596008
Con_Pmod_vs_Con_Scr	O15417|999	O15417	TNRC18	S	999	PPPSPRASPVAALKA	-0.00328219	11.091749126200627	-0.0762369	0.9406556751776565	0.9767664342625131	-6.4864	11.128647910788374	11.260581809115342	11.134215923099436	11.181677525654194	11.135019477695952	11.196902065932605	10.98379300483507	11.104892201245717	11.048998978612666	10.981046035768845	10.93791580457392	11.007298777085404
Con_Pmod_vs_Con_Scr	O15427|436	O15427	SLC16A3	S	436	LHKPPADSGVDLREV	0.046502455892905914	17.962718164617133	1.6358057517321305	0.1313024517368106	0.402413	-5.2171	18.18002402637866	18.162911506618183	18.183602161948517	18.181371182841296	18.280032463754385	18.204641416028373	17.689051887681067	17.724147224930263	17.70200292693492	17.761068746941184	17.738978843555092	17.744785587793665
Con_Pmod_vs_Con_Scr	O15427|460	O15427	SLC16A3	T	460	KNGEVVHTPETSV__	1.6354868769141717e-4	16.658829399240506	0.00380357	0.997036	0.9991406190248322	-6.4895	16.78840331701136	16.663140762916523	16.744030811720027	16.784677110153048	16.66499919457034	16.746389232987614	16.572558243802632	16.62131699858359	16.529288877438226	16.604749310111284	16.553984754101116	16.632414177490332
Con_Pmod_vs_Con_Scr	O15438|281	O15438	ABCC3	S	281	AAPGKNASGEDEVLL	0.13582319134033227	8.331455211187539	3.8953687170670017	0.00269313	0.0546912	-1.5259	8.284040068802575	8.404380962106437	8.33335	8.44063	8.526751148790224	8.461857755964356	8.164710397016691	8.149580791640567	8.145113767469486	8.325817741616804	8.367540655645971	8.373691503516058
Con_Pmod_vs_Con_Scr	O15438|911	O15438	ABCC3	S	911	MRQLSALSSDGEGQG	0.1736306987202756	7.736093106350784	4.819559074493202	6.019509181985893e-4	0.026904680923552828	-0.0477516	7.6985555357007005	7.549894986695145	7.664209686573412	7.818461049425421	7.8116419622486895	7.803449293455969	7.702641589250149	7.66442	7.687094588819168	7.831419250824878	7.8182189705151455	7.78311
Con_Pmod_vs_Con_Scr	O15439|404	O15439	ABCC4	S	404	QRNRQLPSDGKKMVH	0.0480839	15.949060012372412	0.8090888495142473	0.43631354919870735	0.7033877441894159	-6.14997	16.065500259492588	15.894012569233375	16.019582024230502	16.132715054101865	15.930524929885644	16.060106460182475	16.114634420443487	15.966234098666463	16.038213563473338	15.712566793728582	15.756472056189288	15.698157918841336
Con_Pmod_vs_Con_Scr	O15439|646	O15439	ABCC4	T	646	EQPPVPGTPTLRNRT	-0.058913	20.26523080676276	-1.51372	0.15943446239138986	0.43832799432779307	-5.38276	20.48134176700384	20.366267214048268	20.43713571686357	20.429692587815204	20.289305743120043	20.38900742542561	20.21202424957304	20.18831592648153	20.193238161888164	20.07586009302004	20.060559853099907	20.060020942813892
Con_Pmod_vs_Con_Scr	O15440|558	O15440	ABCC5	S	558	LDSDERPSPEEEEGK	-0.064409	18.718633121130253	-1.01895	0.33100059639948576	0.6165887725855593	-5.96029	18.580629834015088	18.72635181355319	18.62048920531381	18.554295430122284	18.604842323865675	18.575106208497623	18.703899409817776	18.878721756883163	18.669355174362693	18.873167167768692	18.824148436712484	19.01259069265056
Con_Pmod_vs_Con_Scr	O15446|136	O15446	POLR1G	S	136	PLQPIPASPPPQIPP	-0.154214	14.243516592477315	-4.81741	6.039686540043446e-4	0.026904680923552828	-0.0510491	14.347841380957195	14.397917606095335	14.386614763329655	14.22614159089282	14.232166020813487	14.211423826984568	14.207755201031382	14.140374811339225	14.116832670230538	14.169575561835565	14.231498261759496	14.254057414458511
Con_Pmod_vs_Con_Scr	O15446|285	O15446	POLR1G	S	285	PLEDTVLSPTKKRKR	-0.0959538	13.062281795535347	-1.62408	0.1337996869722598	0.4056076201265511	-5.23334	12.984346063393575	13.23702690295528	13.071685434450067	12.946337916859523	13.073227934480563	12.98563108599377	13.06899181130999	13.101487377491544	13.04586033949496	13.024394149436828	13.074487312757022	13.133905217801043
Con_Pmod_vs_Con_Scr	O15446|459	O15446	POLR1G	S	459	EARATPGSTKKRKKQ	0.0882217	11.811440766054842	0.8460305190231138	0.4162941598674669	0.6871597874495734	-6.1193	11.72121990532244	11.446532163104992	11.704257623416256	11.800067762691487	11.6426	11.693974304162836	12.326107554488804	11.916420764792491	12.107718585376274	11.73363890565709	11.912723712104974	11.731995213115669
Con_Pmod_vs_Con_Scr	O15466|197;200;201	O15466	ST8SIA5	S;Y;T	197;200;201	RCNLPPISEKYTMDV;LPPISEKYTMDVGVK;PPISEKYTMDVGVKT	0.0826697	15.334029011223695	0.9884523609109863	0.34503751924727566	0.6280213366800089	-5.99013	15.566012469882626	15.435058685604838	15.440970660511248	15.682604257756992	15.364571678286724	15.642875051091185	15.011704825780264	15.203017059329758	15.159888994424724	15.25384840895512	15.091777693024184	15.156018350036677
Con_Pmod_vs_Con_Scr	O15498|172	O15498	YKT6	S	172	EKLDDLVSKSEVLGT	0.0642266	16.730190303125436	0.991969	0.3433974315791172	0.6269139805270822	-5.98673	16.69670906873508	16.88877807002615	16.73317417272763	16.915815751761265	16.716944466367934	16.878581005089103	16.731489974815787	16.599423514815367	16.719586114111692	16.57262901358923	16.684117484900796	16.625035000565195
Con_Pmod_vs_Con_Scr	O15511|77	O15511	ARPC5	S	77	AVKDRAGSIVLKVLI	-0.0121502	14.689419970760301	-0.123709	0.9038685151676631	0.9624154553692953	-6.48133	14.669656953885058	14.751046086407774	14.75852610446766	14.589316567381022	14.906719030390017	14.646743011089717	14.626082585313153	14.348065207482694	14.615834749068515	14.758231597077176	14.930730263577022	14.672087492983811
Con_Pmod_vs_Con_Scr	O15511|8	O15511	ARPC5	S	8	MSKNTVSSARFRKVD	-0.0694176	15.194359595088999	-0.920477	0.3778705826064115	0.6562119387528835	-6.0539	15.267592727004883	15.03621302505487	15.207717031323511	15.2054	14.977483221029956	15.120385097268564	15.36172719580856	15.152534069602767	15.281018214229526	15.236688367476184	15.297934167624136	15.187620325789824
Con_Pmod_vs_Con_Scr	O15516|461	O15516	CLOCK	T	461	KIPTDTSTPPRQHLP	0.00484068	12.614261461626452	0.14347712150666786	0.8886143902195908	0.9545727112948317	-6.47851	12.546273683454592	12.493026476457253	12.539624809935225	12.579031541705518	12.476517828200084	12.537897628361032	12.735609884280173	12.66193905135616	12.660548532797966	12.68804924288711	12.72349139377997	12.729127466302335
Con_Pmod_vs_Con_Scr	O15530:Q6A1A2|241:214	O15530:Q6A1A2	PDPK1:PDPK2P	S	241:214	SKQARANSFVGTAQY:SKQARANSFVGTAQY	-0.0314962	15.319244525392273	-0.730976	0.48069802189828836	0.7362057472159218	-6.21082	15.325889392975448	15.407141658754137	15.327673227222895	15.265659526035726	15.379056875946382	15.321499390056369	15.20236768931077	15.314913545568176	15.32824257935662	15.361784121930238	15.3048	15.291936933753604
Con_Pmod_vs_Con_Scr	O15530:Q6A1A2|245:218	O15530:Q6A1A2	PDPK1:PDPK2P	T	245:218	RANSFVGTAQYVSPE:RANSFVGTAQYVSPE	-0.0277563	19.34784815802563	-1.01779	0.3315306568434181	0.6170623291990299	-5.96145	19.402283956675767	19.46393648157401	19.405122112586245	19.41553902433395	19.360386936105225	19.41214757411065	19.287960521233845	19.322823689858897	19.303600416493076	19.26159268716353	19.254356108443975	19.284428387728404
Con_Pmod_vs_Con_Scr	O15530:Q6A1A2|248:221	O15530:Q6A1A2	PDPK1:PDPK2P	Y	248:221	SFVGTAQYVSPELLT:SFVGTAQYVSPELLT	-0.0262999	16.017473591085945	-0.823859	0.42823406803013353	0.696191	-6.13785	16.065920293202023	16.088215526739972	16.069695438297934	16.07783796460421	16.009007835986218	16.058085682600968	16.001021366789185	16.034850129319246	15.954734779779798	15.928221710582587	15.922010926111664	16.000081439017553
Con_Pmod_vs_Con_Scr	O15530|513	O15530	PDPK1	T	513	PEAKNFKTFFVHTPN	0.0348514	18.53577492176649	0.6203688022647365	0.5481683632630943	0.7810669375826766	-6.28737	18.488805256307444	18.542532668301863	18.49236371192996	18.466617938337073	18.63008274255681	18.53155525399593	18.49502765589515	18.502089700082784	18.64822298678395	18.597136792518576	18.584893326586386	18.449971027901928
Con_Pmod_vs_Con_Scr	O15534|704	O15534	PER1	S	704	PVVGGTLSPLALANK	0.14001015768728564	12.606665170395951	1.9826237009267935	0.0740232	0.30064815672257544	-4.70895	12.429772434701905	12.46211822377861	12.494535611532008	12.5965	12.643198498398974	12.566783865152807	12.811265091784463	12.810632656820676	12.57903463762282	12.533644645160129	12.580941358160084	12.77158064211634
Con_Pmod_vs_Con_Scr	O15534|815	O15534	PER1	S	815	DSSSTAPSALGERGC	0.0473446	22.52229369043599	0.5846229220699268	0.5710795608523074	0.7933477251199916	-6.30963	22.74087982062324	22.800256693328677	22.717857046154755	22.84165851448643	22.725222426490628	22.83414642740624	22.22732566285242	22.50991981047449	22.23306603081084	22.217093813452298	22.08116553556497	22.33893250358691
Con_Pmod_vs_Con_Scr	O15550|1061	O15550	KDM6A	S	1061	RSHHKDHSDSESTSS	-0.0356143	12.68275560812519	-0.586259	0.5700192600204722	0.7930284814787345	-6.30864	12.641054337005354	12.497729149047812	12.588825494804889	12.648802814996149	12.400427755283475	12.57153554857938	12.876497740348084	12.870312145053749	12.78414391200849	12.757126217762176	12.73559993585874	12.821012246753972
Con_Pmod_vs_Con_Scr	O43149|1518	O43149	ZZEF1	S	1518	ATAEEPLSPSTPTRR	0.015226257011953237	16.89724013690897	0.46608561390676134	0.6506198610684707	0.8421437699650729	-6.3745	16.92851307942712	16.916841248551954	16.90842411013419	16.96078026617846	16.889312367322518	16.949364575648136	16.827679568482296	16.91116809461673	16.83119183730493	16.888097102323208	16.839820418631017	16.91568897428705
Con_Pmod_vs_Con_Scr	O43149|2444	O43149	ZZEF1	S	2444	EVERPVSSPGDPEQK	0.0568789	13.775532262821292	1.4898659524579507	0.16550730254899446	0.44600069659945124	-5.41419	13.774510034487845	13.715731569184255	13.739127315753134	13.86388521397448	13.709763132399065	13.826357280784924	13.81090845028746	13.836901193466796	13.794471868719558	13.747864343207512	13.719513724375814	13.767353027214654
Con_Pmod_vs_Con_Scr	O43149|2761	O43149	ZZEF1	S	2761	DRHSFSGSQQKWKDF	-0.0212061	17.61453664202142	-0.189142	0.8535672058284741	0.9396286478972444	-6.4704	18.05290124075856	17.53573129970695	17.88510219616111	17.887301210287355	17.704633232039974	17.818182093313318	17.43348256816732	17.576693317355005	17.404257409130174	17.452306607645255	17.25550423230761	17.368344297384397
Con_Pmod_vs_Con_Scr	O43149|821	O43149	ZZEF1	S	821	EEKAPIQSPKGVEAA	-0.0640181	13.936646448216763	-1.85796	0.0912473	0.3339241009667744	-4.89726	13.839641551213033	13.954246104462491	13.851761204591112	13.81229016873369	13.80926306172727	13.832	13.959749025202298	14.04191145396528	14.014722136922275	14.045143617705452	14.02075817299056	14.058229560905184
Con_Pmod_vs_Con_Scr	O43150|701	O43150	ASAP2	S	701	LHEDLDESDDDMDEK	-0.0333897	21.563992644133748	-1.24239	0.2409748994403149	0.5329873781186589	-5.72007	21.478944187756746	21.519437495413577	21.495115886021264	21.440407559931536	21.495890438105107	21.45703059938518	21.619308345473605	21.58719570191764	21.641413697182212	21.67780239576752	21.70174070127807	21.653624721372505
Con_Pmod_vs_Con_Scr	O43150|712	O43150	ASAP2	S	712	MDEKLQPSPNRREDR	-0.0314267	15.603860976066166	-1.15503	0.2735420800719792	0.5639151697685688	-5.81836	15.483715190285286	15.408508155293733	15.44977694229292	15.432031806723815	15.390681057119169	15.425007174814464	15.72055207503461	15.748370166128112	15.748881439245809	15.839214242680564	15.801272099305828	15.79832136386968
Con_Pmod_vs_Con_Scr	O43157|1535	O43157	PLXNB1	S	1535	QLENLESSVRDRCKK	0.00889771	14.771981358075077	0.17920987129097263	0.8611648010607906	0.9430203254817859	-6.47236	14.705430631311255	14.803212314517644	14.685430956904929	14.728674832245114	14.72268111808236	14.76941108755124	14.833956564408748	14.91845285505599	15.015429131855113	14.749756200765615	14.69929001879791	14.632050585405018
Con_Pmod_vs_Con_Scr	O43159|126	O43159	RRP8	S	126	QALVGSDSAEDEKRK	-0.0285419	15.957898289208568	-0.873037	0.4020582122181534	0.676762	-6.09612	16.104366086301468	15.997571836825502	16.080941167247833	16.063170143618237	16.000607548316992	16.03347576269575	15.960037312491403	15.897109943639672	15.918546367559763	15.81249108573351	15.825026972363478	15.801435243709207
Con_Pmod_vs_Con_Scr	O43159|176	O43159	RRP8	S	176	KQSPGSTSPKPPHTL	-0.0934309	14.958092931064197	-2.23242	0.0482861	0.24528343941993674	-4.31645	14.97474241521303	15.121835263529924	15.001596622105431	14.980583573240567	14.871840691888233	14.965457482026094	14.9732	14.946281640241764	14.970684130351914	14.86311555326426	14.909991975661992	14.917755603437858
Con_Pmod_vs_Con_Scr	O43159|223	O43159	RRP8	S	223	PTEKTEVSPVPRTDS	-0.0213009	12.028069704845441	-0.425713	0.6788628901155841	0.8577594994659347	-6.3934	11.99780021155838	12.072694641124349	11.97279300340658	12.071085367719416	11.862998913151433	12.045300989777031	12.122901270925244	12.156964579028774	12.187037593876925	11.95637027272498	11.941167623336014	11.94972199151616
Con_Pmod_vs_Con_Scr	O43164|253	O43164	PJA2	S	253	TEFVHQNSQEIQRSS	0.0878535	13.285600141690729	1.309692097132589	0.21807532816955533	0.5085082671253285	-5.64073	13.22853190944891	13.115310559111444	13.172003735573874	13.337083202865085	13.153018185740237	13.289305221091013	13.38607066133742	13.541335519997338	13.335127067772556	13.296992280093622	13.193676350891334	13.378747006365913
Con_Pmod_vs_Con_Scr	O43166|1116	O43166	SIPA1L1	S	1116	ANIPRSISSDGRPLE	-0.051228	14.625327794274941	-1.1934	0.25883455105644104	0.5495951397041573	-5.77586	14.576564788518336	14.467399879187523	14.57822099873041	14.521394772050115	14.472008319103455	14.47509850540972	14.845227036607085	14.748093918093478	14.704180709489387	14.664974585098784	14.711341666352006	14.739428352658996
Con_Pmod_vs_Con_Scr	O43166|1117	O43166	SIPA1L1	S	1117	NIPRSISSDGRPLER	0.00219777	13.616759389806692	0.0945375	0.926452	0.9705910324884441	-6.48473	13.50900502160268	13.456878184098093	13.496609402277349	13.484141046396848	13.50044241183751	13.48450244956011	13.724823774260924	13.744722265538318	13.721165804201217	13.76991954085082	13.748177850941474	13.760724926114952
Con_Pmod_vs_Con_Scr	O43166|1127	O43166	SIPA1L1	S	1127	RPLERRLSPGSDIYV	0.0345342	12.663867422350505	1.179095009769541	0.26424279336462764	0.5548846440364437	-5.79183	12.630547077670736	12.544059005066844	12.592705451891586	12.650052679668146	12.585246912154483	12.6356	12.688640435353204	12.711136904014785	12.707941043431957	12.76425997992433	12.727326763684989	12.728878257589088
Con_Pmod_vs_Con_Scr	O43166|1181	O43166	SIPA1L1	S	1181	GFGVSRRSPASIDRQ	0.0928073	15.778014679814456	3.0193025425256548	0.012180233584946305	0.11667567730137245	-3.00417	15.74575661823076	15.78478631091322	15.767348441065405	15.809411865852889	15.927015353938357	15.839886170794111	15.664394112792596	15.69249941853236	15.677832889295845	15.81116238838108	15.806424279307846	15.8097
Con_Pmod_vs_Con_Scr	O43166|1197	O43166	SIPA1L1	S	1197	TQSDIGGSGKSTPSW	0.0992638	15.0284	2.6045972672234843	0.025233058768841642	0.17342882507150634	-3.70503	15.04937674396122	15.018990624443587	15.069159309173532	15.12921673730422	15.18448502237309	15.121616454073234	14.89904003841546	14.914237776903358	14.798786856228135	15.021431617683696	15.024090099434863	15.110712767028009
Con_Pmod_vs_Con_Scr	O43166|1255	O43166	SIPA1L1	S	1255	VLPAFRESPSGRLMR	0.0794314	13.252820443633382	2.195300555153746	0.0514794	0.2521439597294611	-4.37587	13.334292998630042	13.20541227660447	13.305944460293151	13.39892742496184	13.3225	13.362517481683772	13.125086325048814	13.065258676628536	13.069028381377006	13.279651631100702	13.287393947666338	13.277832608782116
Con_Pmod_vs_Con_Scr	O43166|1270	O43166	SIPA1L1	S	1270	QDPVVHLSPNKQGHS	0.0759774	13.124629803009169	1.9729502994156503	0.0752429	0.3028990687219249	-4.72376	12.983303070777552	13.147601060525748	13.02606671669521	13.131683926258866	13.115180573915092	13.138038652389028	13.142404595307015	13.112250514131295	13.147493496842795	13.151622288432575	13.205149216389255	13.194763524445602
Con_Pmod_vs_Con_Scr	O43166|1393	O43166	SIPA1L1	S	1393	RKTESSLSLDIHSKS	-0.00970422	15.6312	-0.220679	0.8295505524650961	0.9287450555547305	-6.46352	15.73963035552707	15.62069252795142	15.732556325126662	15.671741707609458	15.727536287855374	15.66448854963015	15.462551620755724	15.338029522497608	15.427713539461852	15.733504763865351	15.776723505738987	15.679463714559551
Con_Pmod_vs_Con_Scr	O43166|1404	O43166	SIPA1L1	S	1404	HSKSQAGSTPLTREN	0.0597428	10.268385481325957	1.3598227598753536	0.2022091035830296	0.4905642652630014	-5.57971	10.130073774396225	10.158731856816328	10.18554763403027	10.20861444462722	10.256151754010151	10.188815411941144	10.340390036894794	10.20109685097331	10.19708385870885	10.383186020015664	10.486845048646918	10.484089084850606
Con_Pmod_vs_Con_Scr	O43166|1405	O43166	SIPA1L1	T	1405	SKSQAGSTPLTRENS	-0.0726109	9.76268	-0.858764	0.40953993504492425	0.6830125864172162	-6.10845	9.66104	9.721335063533644	9.77435	9.518918575352052	9.863699904421566	9.556275377414396	9.825279163511937	9.667517933073723	9.649074962208232	9.890461071716912	10.023551530854608	10.000596724356877
Con_Pmod_vs_Con_Scr	O43166|1433	O43166	SIPA1L1	S	1433	MSSRHSASPVVFTSA	0.00767365	14.510428247689681	0.20572975347442476	0.8409140055700852	0.9340891848435334	-6.46691	14.432069678441666	14.587866857567466	14.477449033494109	14.49039861318114	14.522233636014862	14.507774278586352	14.416296529148738	14.38575192088642	14.429834632101352	14.598988664069216	14.650430109359558	14.626045019425291
Con_Pmod_vs_Con_Scr	O43166|1508	O43166	SIPA1L1	S	1508	DTRKRHQSDGNEIAH	-0.055356	16.673984792640375	-1.10121	0.2952720892105244	0.5857516647999582	-5.87618	16.74401447963729	16.889542564048103	16.818286802935162	16.698413868931635	16.85645250320831	16.730909501542754	16.540052478234756	16.444751070810955	16.510104889699317	16.576598856021384	16.66923324602309	16.609457250591767
Con_Pmod_vs_Con_Scr	O43166|1528	O43166	SIPA1L1	S	1528	STRDLRASPKPTSKS	-0.152509	17.0387	-2.76416	0.019065524552045438	0.14847194375526115	-3.43681	17.0984	17.129295230481926	17.108813224693527	16.90105814245722	17.03261285840439	16.9454	16.889588719294146	16.809515965561193	16.992981497128987	17.217816351861302	17.252713445792015	17.08579839069572
Con_Pmod_vs_Con_Scr	O43166|1549	O43166	SIPA1L1	S	1549	KKLIDLESPTPESQK	0.0400159	17.549959888334225	0.9684351560657916	0.35448330616225976	0.6363633403157662	-6.0093	17.529397035644703	17.61924090168739	17.561580935526266	17.562318822238506	17.670715887906677	17.597231924142097	17.3829	17.32589331891369	17.434614741340177	17.640280521723195	17.68520434177199	17.5902
Con_Pmod_vs_Con_Scr	O43166|1551	O43166	SIPA1L1	T	1551	LIDLESPTPESQKSF	0.12638675593843018	11.992624043746666	2.226138379994881	0.0488125	0.2462626516499809	-4.32652	11.989166137531484	11.84166235561251	11.98695556273116	12.080468353563193	12.073762048741408	12.042713921385838	12.003501683864592	11.79140354154953	11.901299442007105	12.043251535972336	12.134660487337545	12.022643454663294
Con_Pmod_vs_Con_Scr	O43166|1565	O43166	SIPA1L1	S	1565	FKFHALSSPQSPFPS	0.010123322009786051	17.531923805418526	0.3870933688587016	0.7063737922200382	0.8710887572220202	-6.40993	17.49701386618227	17.508060944120224	17.4926	17.48803785819119	17.531444070111053	17.508586279163715	17.491194680791082	17.50381187406425	17.54897371221113	17.62643902931261	17.614	17.57285532769168
Con_Pmod_vs_Con_Scr	O43166|1568	O43166	SIPA1L1	S	1568	HALSSPQSPFPSTPT	0.00248686	16.209697528854896	0.060329	0.9530201229406753	0.9808425196382462	-6.48756	16.19004472238597	16.30211650620055	16.252943141858637	16.200812681758375	16.329305565636723	16.22244670246651	16.194609864579867	16.16046471905834	16.13522984143784	16.132364512509664	16.189497255231867	16.206534833134427
Con_Pmod_vs_Con_Scr	O43166|1583	O43166	SIPA1L1	T	1583	SRRALHRTLSDESIY	0.0620195	13.108555434003524	2.0522007603009396	0.0657818	0.28695290383418104	-4.60149	13.031639723047215	13.11736069139082	13.05779767945378	13.1476	13.107835441198883	13.137428046205434	13.066243460604843	13.06075536693326	13.02717541324557	13.149855345364394	13.178608788402713	13.22037204951278
Con_Pmod_vs_Con_Scr	O43166|1588	O43166	SIPA1L1	S	1588	HRTLSDESIYNSQRE	6.070172200622892e-5	11.952777784744725	0.00119781	0.9990666095101484	0.9999089050054447	-6.48951	11.951187370356555	11.90320429474844	11.987283486133224	11.883220602772726	12.059520159155008	11.8991	11.93656453684844	11.809339039548377	11.866943612233708	12.024698066294638	12.094738374378483	12.017517379990602
Con_Pmod_vs_Con_Scr	O43166|162	O43166	SIPA1L1	S	162	MPEAYPSSPRKALRR	0.12058206743068922	11.310391390474017	2.329201740377519	0.0408305	0.22339392018893775	-4.15997	11.219082823166689	11.22456893735232	11.25518868079687	11.406433422560657	11.304940608445044	11.349212612602251	11.39300037944422	11.199723087927666	11.234633681324722	11.303028246943583	11.42814438532979	11.406739819794383
Con_Pmod_vs_Con_Scr	O43166|1632	O43166	SIPA1L1	S	1632	SLPLRRPSYTLGMKS	-0.04319	17.51099162536416	-1.13465	0.28162	0.5717077278882909	-5.84051	17.551976185979054	17.617489613687695	17.53983790004672	17.507693207637683	17.530947026463977	17.54109354757524	17.420201742560902	17.554654939405733	17.52564296086819	17.484051013467955	17.413198333224557	17.445113033452188
Con_Pmod_vs_Con_Scr	O43166|1734	O43166	SIPA1L1	S	1734	YSSSKDSSPTLASKV	0.0334502	15.39169610019747	0.6285670497068927	0.542988	0.77801	-6.28209	15.238967861210623	15.401911957767377	15.301878637761678	15.269485683225286	15.450730912713317	15.322892323085943	15.373317267824415	15.325400640944046	15.416259116558836	15.519524535440643	15.580313457783245	15.499670808054232
Con_Pmod_vs_Con_Scr	O43166|211	O43166	SIPA1L1	S	211	REYGSTSSIDKQGTS	-0.00350435	16.38102776606878	-0.0610165	0.952485	0.9806417523229897	-6.48752	16.404981321161642	16.365060829094837	16.41674023523971	16.388021932657786	16.409833705483457	16.378413703542233	16.3958	16.18332850333093	16.380976074998262	16.406308222503604	16.509825984475285	16.333047017820515
Con_Pmod_vs_Con_Scr	O43166|286	O43166	SIPA1L1	S	286	EKPLKRRSKSETGDS	0.0411952	18.75923983364768	0.4851859349610438	0.6374524367986901	0.8354426502055945	-6.36499	18.80372106363086	18.972532520425016	18.7886	18.79953965526416	18.977188217632204	18.91169320946647	18.577043023401437	18.851386380947496	18.874888313381646	18.62104062567984	18.474273135336293	18.458989937782952
Con_Pmod_vs_Con_Scr	O43166|288	O43166	SIPA1L1	S	288	PLKRRSKSETGDSSI	0.0899399	16.757333096921123	1.332914961977371	0.21060168401873208	0.5005297495583837	-5.61267	16.84757305700905	16.738937720300726	16.784618445172512	16.809599409847515	16.955351804788595	16.87599756274561	16.433225462987238	16.540504894601856	16.647743331491135	16.932180364292563	16.818856091201894	16.703409018614764
Con_Pmod_vs_Con_Scr	O43166|311	O43166	SIPA1L1	S	311	GEELGKSSDLEDNRS	-0.0161411	11.611349634333017	-0.466567	0.650286	0.8420914645435562	-6.37427	11.688021675717708	11.760820789353389	11.720625596114632	11.689571129798844	11.734737533196029	11.69673617583797	11.50985206139429	11.553858182931304	11.461551553502792	11.47763724715056	11.481165695539048	11.561617971459633
Con_Pmod_vs_Con_Scr	O43169|13	O43169	CYB5B	S	13	ATAEASGSDGKGQEV	-0.118783	13.423228433925377	-1.87863	0.0881559	0.32872431965250354	-4.86644	13.512632380882096	13.354298028536778	13.47018398281957	13.247660351245075	13.43495533407025	13.298150416230165	13.319120574311595	13.336856808801787	13.434492436964293	13.637809180828508	13.576309357145815	13.456272355268585
Con_Pmod_vs_Con_Scr	O43169|23	O43169	CYB5B	S	23	KGQEVETSVTYYRLE	0.0513343	16.871518220641494	0.9900999341533827	0.34426832299175736	0.6274286948236532	-5.98854	17.006125556722584	16.799283823641435	16.987135253062647	16.964054701073707	17.036298243862902	16.94619456946563	16.783925700767558	16.700524126242193	16.691065815911802	16.84899067668031	16.859893593729062	16.834726586538125
Con_Pmod_vs_Con_Scr	O43194|384	O43194	GPR39	S	384	HAHSTTDSARFVQRP	-0.0250059	17.842468525127575	-0.618441	0.5493904299240973	0.7815615039225671	-6.2886	17.64474560172375	17.785877545248045	17.70818535666261	17.67556103519777	17.71203369804986	17.67619609658643	18.11192722413753	18.03487664546374	18.04230364736072	17.847827258681523	17.93365100606172	17.936437186357225
Con_Pmod_vs_Con_Scr	O43237|194	O43237	DYNC1LI2	S	194	PEEGCQGSPQRRGPL	-0.0423069	15.740113959989015	-1.06719	0.3096733334754043	0.5971786708364262	-5.9116	15.73190092066432	15.702231628138476	15.708687909642402	15.741751119317552	15.574203927917685	15.69994469020576	15.820033677261025	15.75489052510012	15.806907287055072	15.773090568280915	15.798032849828452	15.769692416456406
Con_Pmod_vs_Con_Scr	O43237|391	O43237	DYNC1LI2	S	391	PARGPSGSPRTQGRG	0.012616879413791082	18.687870869022063	0.12084350340868945	0.9060834593988083	0.9639185738285194	-6.4817	18.93538075755395	18.56144341225132	18.79593473482901	18.95592816202111	18.541500917132673	18.83318046372187	18.78306058188304	18.73073463827269	18.72043812623725	18.501204749959808	18.439913105751355	18.45573077865068
Con_Pmod_vs_Con_Scr	O43237|446	O43237	DYNC1LI2	S	446	KKTGSPGSPGAGGVQ	-0.0177628	14.008537946777082	-0.352588	0.7313332580423003	0.8812442900554641	-6.4234	14.05054074989361	13.914	14.021726196336951	14.036722484393998	13.914085789994038	13.982171235952803	14.079276998635812	14.087135413866882	13.961879035057455	13.99701415784172	13.97687250271636	14.081029793725357
Con_Pmod_vs_Con_Scr	O43242|47	O43242	PSMD3	S	47	EAATGGGSTGEADGK	-0.0178425	17.037759880298317	-0.53143	0.606118	0.8162373069307259	-6.34046	17.05241951726442	17.00964763532445	17.043944014128027	16.998229785822478	17.044838802057875	17.009415024400592	17.02710964800686	16.969196432612257	17.064123597997394	17.098383609260285	17.11320344831727	17.022607048387915
Con_Pmod_vs_Con_Scr	O43242|507	O43242	PSMD3	S	507	SYNKDLESAEERRER	-0.0117951	12.164516872038138	-0.416058	0.6856970780554787	0.8608983372459662	-6.39767	12.190158243240438	12.114718524877254	12.188859536830751	12.14765231555172	12.174130863015773	12.136567870584312	12.204253628395303	12.170126617247472	12.145473041415135	12.157972248922984	12.167968854123709	12.176320720252804
Con_Pmod_vs_Con_Scr	O43290|348	O43290	SART1	S	348	LEGERPHSFRLEQGG	0.0621816	12.523255250110378	0.9914972858153555	0.3436169310063488	0.626917	-5.98718	12.405093257637802	12.41631377455062	12.429795890167782	12.56907904754496	12.377172693447635	12.49149602315936	12.755905147880544	12.671422752227496	12.56088756628987	12.446707884802002	12.520742668488095	12.634446295128376
Con_Pmod_vs_Con_Scr	O43290|448	O43290	SART1	S	448	GRGRRRVSEVEEEKE	-0.0476254	19.13033036081637	-0.641992	0.534565	0.7733736572796892	-6.27331	19.089852850260876	19.217170951803872	19.154090428196483	19.022132654664023	19.22275727511724	19.073347968670177	19.041542498905912	18.86216418300815	19.093301064853296	19.25187746971612	19.371295182952213	19.164431801648057
Con_Pmod_vs_Con_Scr	O43290|474;486	O43290	SART1	S;S	474;486	RVENMDISDEEEGGA;GGAPPPGSPQVLEED	0.0717392	12.949580776977546	1.9004961811168473	0.0849918	0.32266066786023506	-4.83366	12.782765460587743	12.723928770920413	12.771135176956108	12.806402858241134	12.869158095974512	12.817486030669324	13.074763927224584	13.176607141633781	13.059806567382374	13.117540380944243	13.054684288462392	13.14069062473394
Con_Pmod_vs_Con_Scr	O43290|48	O43290	SART1	S	48	RSGGSGGSGGERRKR	0.0759997	12.222315564969724	1.9767609375880661	0.0747602	0.30178427489166354	-4.71793	12.231441050073268	12.096386433673285	12.182550823273225	12.267865922555602	12.21796019380523	12.252551170274838	12.26596736453227	12.340242868411355	12.267455325613966	12.211899731853215	12.139849617453123	12.193616278117323
Con_Pmod_vs_Con_Scr	O43290|738	O43290	SART1	S	738	HRFHGKGSGKMKTER	0.043821642152241935	14.718549455959447	0.4772493437572596	0.6429082022753937	0.8383273999837199	-6.36899	14.842438983995509	14.769928041397902	14.723357065670406	14.824233445149396	14.763686565789843	14.879269006581302	14.70084461623688	14.89312251926627	15.059639984488118	14.551641936875246	14.374359363734468	14.24007194232802
Con_Pmod_vs_Con_Scr	O43293|312	O43293	DAPK3	S	312	YTIKSHSSLPPNNSY	-0.000686631	16.904472007608863	-0.0183124	0.9857310505719543	0.994622	-6.48933	16.885286362828158	16.83782714156386	16.883232608391104	16.882690282200393	16.859218790235822	16.86237714726592	16.927120531151168	16.972423689894338	16.846205242933483	16.945832859879495	16.92381536190656	17.027634073056074
Con_Pmod_vs_Con_Scr	O43294|122	O43294	TGFB1I1	S	122	FPSSKVASGEQKEDQ	-0.0812571	16.77840460730011	-1.34851	0.20570161169803095	0.4949437248293855	-5.59362	16.89136618225172	17.032958963578697	16.945969420227396	16.882697711720734	16.8716	16.87220927469339	16.47937375944131	16.556621129216303	16.365872607809315	16.74689424581834	16.75899157338772	16.9363
Con_Pmod_vs_Con_Scr	O43294|137	O43294	TGFB1I1	S	137	SEDKKRPSLPSSPSP	-0.0305573	19.80814377851863	-1.11497	0.2895918466305821	0.5803267611239841	-5.8616	19.800896695471895	19.871874424780827	19.83220473336883	19.77711626853262	19.843244878542126	19.792942907862663	19.66539825964766	19.64653565665879	19.65686150759973	19.92021224572777	19.949830443501902	19.94060732052876
Con_Pmod_vs_Con_Scr	O43294|137;141	O43294	TGFB1I1	S;S	137;141	SEDKKRPSLPSSPSP;KRPSLPSSPSPGLPK	-0.0169442	14.291550427222033	-0.338152	0.7418750382637255	0.885517	-6.42867	14.31941069113569	14.400807089629998	14.341	14.36025233959686	14.304690021358995	14.345424886620314	14.051176452676298	14.147453560082134	13.98161533951169	14.377231878831328	14.356875618645876	14.512685238763405
Con_Pmod_vs_Con_Scr	O43294|143	O43294	TGFB1I1	S	143	PSLPSSPSPGLPKAS	-0.119299	17.729318463535922	-2.4102	0.035459703956464965	0.2087725656669659	-4.0275	17.675191397344086	17.75843761887823	17.732898071702763	17.534235897562013	17.709041383410177	17.565351357402427	17.702527127990713	17.744429482914473	17.634137218881158	17.862518664260158	17.875946198784344	17.957107143300533
Con_Pmod_vs_Con_Scr	O43294|33	O43294	TGFB1I1	T	33	ERPAEPLTPPPSYGH	-0.0526845	18.44775814058706	-1.1674	0.26873009077226034	0.5592365124064065	-5.80477	18.408476166607898	18.49871335119907	18.472182135484292	18.40300352143356	18.43192110485467	18.38639349002467	18.38478315013747	18.313396393525284	18.243529120600407	18.5344	18.616812486462894	18.6794
Con_Pmod_vs_Con_Scr	O43294|68	O43294	TGFB1I1	S	68	STVCKPRSPKPAAPA	0.0759705	18.57239006063469	2.1139683339232738	0.059198	0.2716193295954893	-4.50482	18.652610106603817	18.637724221977894	18.613972140239923	18.752562348701765	18.63699664010989	18.74265894495476	18.27285677582539	18.299458819926507	18.351031283399397	18.66823934172609	18.63536915406406	18.605200950086775
Con_Pmod_vs_Con_Scr	O43303|641	O43303	CCP110	S	641	LGTSSKESEELLKSK	0.0860519	16.490447082411865	1.3757965235512823	0.19736026189327288	0.4864171524523156	-5.55993	16.419730543881208	16.493559609353287	16.433329755458363	16.558025759026428	16.50093605420581	16.54581380004964	16.40067908199344	16.56246249627839	16.33457200183797	16.51372653396642	16.457025789653667	16.665503563237767
Con_Pmod_vs_Con_Scr	O43306|54	O43306	ADCY6	S	54	LRDAEPPSPTPAGPP	0.1848610985219885	14.976828998789752	1.6179918188493414	0.13511319349440393	0.4066334140734455	-5.24175	15.033742539731731	14.828725586509409	14.9293	15.216208916832413	14.971366755202355	15.15877576445684	14.95095911800036	15.289692534012808	14.904879279984346	14.849184804988935	14.626738776099776	14.962373894973563
Con_Pmod_vs_Con_Scr	O43306|576	O43306	ADCY6	S	576	LQRTRANSMEGLMPR	0.0179042	14.17589531163322	0.3852504892533852	0.7076980414636236	0.8714150467582014	-6.41068	14.207024273129296	14.30919326038589	14.25894687749642	14.192189215405032	14.393640106886254	14.243047705856336	14.092426170488972	14.089899908872386	14.10774414972892	14.062900078581436	14.09071132024146	14.063020672526225
Con_Pmod_vs_Con_Scr	O43310|18	O43310	CTIF	S	18	SEAGSSRSQEIEELE	0.014213116936044656	16.097336344907347	0.33382445068252786	0.7450464835203128	0.8875204027134851	-6.43021	16.0988	16.135187935262287	16.065307571553777	16.11979390851323	16.080194350839797	16.14190391729308	15.989170750350953	16.14696094395675	16.109168379362494	16.141645073170515	16.04791922456162	16.092026765001773
Con_Pmod_vs_Con_Scr	O43310|299	O43310	CTIF	S	299	SSLEAPRSPDTLAPV	-0.0748295	17.12794514168211	-1.74438	0.11007971652333863	0.36610034217890397	-5.06352	17.063333706374603	17.20380492888729	17.092613758599853	16.989596329153652	17.10513214010758	17.040535391540473	17.090529906946568	17.179493449917558	17.17147918978191	17.21162448946076	17.188365356204336	17.198833053210723
Con_Pmod_vs_Con_Scr	O43310|302	O43310	CTIF	T	302	EAPRSPDTLAPVASE	-0.0769762	15.282188183066463	-1.74887	0.10927431185350303	0.3644317626241132	-5.05707	15.183770431270949	15.315060216428606	15.20617147702823	15.101274283235496	15.217606456398636	15.155192696230015	15.250973310372707	15.35896460581074	15.34635717350163	15.437504637262291	15.399846263031144	15.413536646227112
Con_Pmod_vs_Con_Scr	O43310|328	O43310	CTIF	S	328	VETKRKDSILPERIG	-0.182217	23.071872821967272	-1.84189	0.0937199	0.3392341216133132	-4.92112	23.232002648492436	23.46570922432189	23.25737861466436	22.985808443035104	23.29751179003478	23.125118336453276	22.91986865001269	23.232113392132288	23.182010933061186	22.803594646226617	22.661635021298867	22.69972216387378
Con_Pmod_vs_Con_Scr	O43310|51	O43310	CTIF	S	51	KTEGDGESERTQSHI	-0.374	8.473776412098253	-2.8516	0.016349614983398868	0.13772489966870777	-3.28891	8.314777930512946	8.83354	8.474724572803266	7.976677341189188	8.4011	8.123266167939843	8.398525605093555	8.614071568052827	8.494039316605035	8.643752136656174	8.649791110939741	8.761058915842044
Con_Pmod_vs_Con_Scr	O43314|1006	O43314	PPIP5K2	S	1006	TGRRRRRSGEQITSS	-0.164461	16.964111008665054	-3.54397	0.00489401	0.0725853	-2.11365	17.074825484866214	16.92441689006475	17.016997427950404	16.904412003226895	16.75705567901712	16.861388007086827	17.224710377208567	17.267242821148344	17.197395512864638	16.798035053988677	16.74124085884635	16.80161198771184
Con_Pmod_vs_Con_Scr	O43314|1016	O43314	PPIP5K2	S	1016	QITSSPVSPKSLAFT	-0.198534	14.031374802998917	-5.82939	1.3419564700379373e-4	0.012536466231457257	1.423935727234059	14.0618	14.178162392364085	14.10357981599836	13.914199775814565	13.918420851745427	13.915332720556895	14.100333972876763	14.02850631228496	14.078515183517297	13.99059771722332	14.05920386156594	14.027832046508788
Con_Pmod_vs_Con_Scr	O43314|1108	O43314	PPIP5K2	S	1108	GSAVKRFSISFARHP	-0.272967	18.770858711082433	-8.19159	6.7729850629135145e-6	0.00414426	4.267203000199573	18.99345546293638	18.98105222038412	18.974045717643257	18.74289202703048	18.65968247420176	18.727076465888477	18.78714024868163	18.862799957327912	18.781794515037248	18.582985208946468	18.539773332571094	18.617606902340384
Con_Pmod_vs_Con_Scr	O43314|38	O43314	PPIP5K2	S	38	DDEEEDDSPPERQIV	0.0330246	16.716211730961547	1.108674541021066	0.29218058770423144	0.5830360933780582	-5.86829	16.726105382052996	16.633907432920864	16.70497718889096	16.751438943254275	16.689186852532757	16.72343806353722	16.75084592069463	16.71818791729037	16.706204847925875	16.727336817763867	16.72819102078818	16.73472038388657
Con_Pmod_vs_Con_Scr	O43314|493	O43314	PPIP5K2	S	493	HGCPKTSSEEEDSRR	0.0587293	10.077100555904952	2.2548058291792414	0.0464527	0.23968651227435167	-4.28044	10.038166062537936	10.02766474317824	10.05019704496578	10.1097	10.091131130260392	10.091402790025809	10.082576673007472	10.048357201994188	10.01347785603084	10.09701273474924	10.12316906871494	10.152369512239783
Con_Pmod_vs_Con_Scr	O43314|498	O43314	PPIP5K2	S	498	TSSEEEDSRREEPSL	0.20687526570149828	11.862234790344697	4.229397121434399	0.00154675	0.0423363	-0.978827	11.706384351358093	11.798199670191698	11.76935061844755	11.965699412382582	11.983017159566153	11.945843865153092	11.90599254101672	11.861305735472513	11.753150708541426	11.806688900556887	11.877235896387493	11.973948625062148
Con_Pmod_vs_Con_Scr	O43318|361	O43318	MAP3K7	S	361	KNQAKQQSESGRLSL	0.0925305	10.283859739779793	1.9905313901292083	0.07304	0.299149	-4.69682	10.062196204269831	9.887109341492849	10.016179720526829	10.079252779386662	10.090896284080348	10.0729	10.592159631760511	10.529976175484864	10.61869183471227	10.526588529889786	10.51302116378182	10.41731746428054
Con_Pmod_vs_Con_Scr	O43318|371	O43318	MAP3K7	S	371	GRLSLGASRGSSVES	0.17191552114197428	12.713523849252399	3.326874338875212	0.00712042	0.0885024	-2.48113	12.742344392823814	12.746949133041785	12.700527331565588	12.876871546054874	12.909674761259108	12.919021113543122	12.549715558333103	12.767529401617534	12.694352185122208	12.620584181435492	12.48581632422966	12.5489
Con_Pmod_vs_Con_Scr	O43318|389	O43318	MAP3K7	S	389	TSEGKRMSADMSEIE	-0.0910829	17.250351727389283	-2.66913	0.0225303	0.1629591467013051	-3.59687	17.19583021602276	17.28470185114907	17.23191710874513	17.106888230237264	17.1994	17.132870757461358	17.351748117852246	17.308246148505003	17.36901552511992	17.2635	17.306530983396463	17.253517421099275
Con_Pmod_vs_Con_Scr	O43318|439	O43318	MAP3K7	S	439	NGQPRRRSIQDLTVT	-0.0278618	18.99020554802224	-1.06351	0.31126527609794996	0.5989360997803119	-5.91538	18.98782517310627	18.94429966588074	18.980694092278696	18.967216558613117	18.916384840382015	18.94563218620932	19.059090412372836	18.99977647006465	19.026585832965377	19.009475953638702	19.034001932107746	19.0115
Con_Pmod_vs_Con_Scr	O43318|459	O43318	MAP3K7	S	459	QVSSRSSSPSVRMIT	0.0352737	13.89722889592857	0.48880398664628855	0.6349727528245411	0.8338281274655733	-6.36315	13.985674026328704	13.696970885988636	13.870006492168962	13.932994518413212	13.81591860025717	13.909559479702883	13.944646038008022	13.94461722518262	14.0501	13.96632226220332	13.877531165772156	13.772445854320251
Con_Pmod_vs_Con_Scr	O43353|363	O43353	RIPK2	S	363	GSPETSRSLPAPQDN	0.1662628668520476	14.776679721719862	2.349516284313206	0.0394135	0.2202388231244512	-4.12686	14.712733859690577	14.739265114425429	14.668377044704698	14.793158860710353	14.94411471904488	14.881891039621618	14.673891936927689	14.887838301111682	14.935281228902156	14.806848800739097	14.662863286536757	14.613892468223405
Con_Pmod_vs_Con_Scr	O43353|529	O43353	RIPK2	S	529	EILVVSRSPSLNLLQ	-0.0928598	17.01318888779457	-2.08321	0.062394773018400296	0.27900101756195256	-4.55311	17.30355339153833	17.263691702168785	17.30140611438447	17.23038116361439	17.158598909355415	17.201091707802366	16.90966199297462	16.747638326441425	16.88162111882677	16.70576136458289	16.78315242282022	16.67170843902514
Con_Pmod_vs_Con_Scr	O43353|531	O43353	RIPK2	S	531	LVVSRSPSLNLLQNK	-0.0902876	16.91441597305744	-2.28051	0.0444303	0.23384390648103218	-4.23895	17.226793531292085	17.259423955794134	17.26562157398955	17.14581051305602	17.193847576953566	17.141318068297714	16.84175456499082	16.695793852802968	16.78396647823527	16.436630264342007	16.53064225604793	16.45138904088721
Con_Pmod_vs_Con_Scr	O43365|263	O43365	HOXA3	S	263	LTSSGGQSPSRSPVP	0.16966377719182013	9.300640724895196	3.2589523570812333	0.00801276	0.0940714	-2.59651	9.373823044981435	9.219756686167944	9.35894	9.492745521974344	9.504348815726418	9.464419588891928	9.073997546978228	9.106712750859392	8.947180345890805	9.33842	9.305899731904926	9.421442626751476
Con_Pmod_vs_Con_Scr	O43379|1144	O43379	WDR62	S	1144	RAGTGYASPDRTHVL	-0.0103909	12.091	-0.383873	0.7086885133293844	0.8717759466083569	-6.41124	11.968707570400278	11.918176668023577	11.959038429409906	11.961993284105969	11.911898047772326	11.94085862747076	12.252448008455197	12.18901542413072	12.225021711544745	12.249243535668612	12.273417460464536	12.242297529420574
Con_Pmod_vs_Con_Scr	O43379|49	O43379	WDR62	S	49	LRRRTRLSTASEETV	-0.107971	11.5	-2.05275	0.0657198	0.28677723866127564	-4.60063	11.188392277070992	11.340854411754515	11.271531857214391	11.107498338757033	11.243460606299111	11.125906498977823	11.933972088515244	11.91136555975217	11.830995819632008	11.614175423455915	11.682289375646352	11.748975888617656
Con_Pmod_vs_Con_Scr	O43395|452	O43395	PRPF3	T	452	QKKLRRQTRREAQKE	-0.00668909	15.749248471397241	-0.0995882	0.922536	0.9701441534669152	-6.48421	15.992431086420796	15.833148990197408	15.88246051859272	15.919752950378076	15.833030629935784	15.935189746583788	15.401983365249174	15.54190218538304	15.611755982448251	15.798224514578068	15.651295930401949	15.589805756597825
Con_Pmod_vs_Con_Scr	O43395|619	O43395	PRPF3	S	619	KGDDDEESDEEAVKK	-0.0212046	19.399891297656488	-0.411272	0.6890955521610428	0.8617191512944758	-6.39976	19.378497380279526	19.397246088251997	19.402842331772064	19.341535162939685	19.418577686833196	19.354859252500365	19.35490365966162	19.19367751732865	19.37168599193566	19.523374681432543	19.610406125901807	19.451089693040753
Con_Pmod_vs_Con_Scr	O43396|113	O43396	TXNL1	S	113	HLENDPGSNEDTDIP	0.031139831917890604	16.2009	1.1756186824254085	0.26557077222630915	0.5559927348750644	-5.79569	16.19065851798088	16.140293100493153	16.173728989889963	16.17914725893132	16.22543717998117	16.193515665205176	16.21884295329047	16.236680771687656	16.2586	16.22536633470025	16.1987	16.169926451756467
Con_Pmod_vs_Con_Scr	O43399|12	O43399	TPD52L2	S	12	GQDINLNSPNKGLLS	3.876489585863396e-5	16.68224414021268	0.00143111	0.9988848171979233	0.9998695371966776	-6.48951	16.636136850354145	16.671563728292536	16.661271587881068	16.629711406721167	16.698528114473202	16.64084894002094	16.666133446695884	16.67561704659652	16.63372280044314	16.74056644863069	16.75101996327071	16.781809349172157
Con_Pmod_vs_Con_Scr	O43399|145	O43399	TPD52L2	S	145	QKTSAALSTVGSAIS	0.0715313	19.384214809545494	0.5712795867887605	0.5797644626794616	0.7991087847066679	-6.31762	19.765889264715383	19.471458007779496	19.627472240064613	19.646796810575346	19.735873588784568	19.696743093999928	18.971019614744822	19.4683	19.13081413354828	19.182976032468613	18.831	19.082202746636767
Con_Pmod_vs_Con_Scr	O43399|149	O43399	TPD52L2	S	149	AALSTVGSAISRKLG	0.0769602	12.859443683743839	1.561945440728531	0.14774753028520152	0.42341888835533215	-5.31826	12.881692774679436	12.771576635979386	12.840116517891412	12.999346882425344	12.788814564948392	12.936105031495014	12.918754705462486	12.85360393529057	12.863462252530244	12.811095829830126	12.822816110754983	12.82593896363867
Con_Pmod_vs_Con_Scr	O43399|166	O43399	TPD52L2	S	166	RNSATFKSFEDRVGT	-0.277023	20.8982	-1.23828	0.2424325348451258	0.5342475240818075	-5.72481	21.062692210236747	20.124016582527368	20.810566224663543	20.707272993055884	20.024953014592928	20.433981188368552	21.10393765008268	20.932119999139093	20.7339	21.628281535780097	21.53871694214355	21.678464375411355
Con_Pmod_vs_Con_Scr	O43399|21	O43399	TPD52L2	S	21	NKGLLSDSMTDVPVD	-0.0387919	20.668423603950718	-0.763879	0.46166501097767854	0.7215539221046843	-6.18586	20.85149425836276	20.669586236318494	20.80005307365558	20.742702949902828	20.73041529735824	20.731639690020348	20.597523907138623	20.51614908068846	20.632356559271962	20.626826203114916	20.61965578411322	20.50268020746319
Con_Pmod_vs_Con_Scr	O43399|23	O43399	TPD52L2	T	23	GLLSDSMTDVPVDTG	-0.0867558	19.85446955050658	-2.38437	0.0370933	0.21335965492571876	-4.06988	19.99248215145747	19.865763877003168	19.97874575754656	19.87669020068544	19.854068992007953	19.84596523769593	19.848841380668077	19.79488689813083	19.759709927796724	19.79860274906734	19.810507254632267	19.827370179387177
Con_Pmod_vs_Con_Scr	O43399|3	O43399	TPD52L2	S	3	_____MDSAGQDINL	0.0315721	10.556634692994448	0.5315654088100296	0.6060273445448844	0.8161984438314942	-6.34038	10.47798971358416	10.479514438922177	10.46189893400809	10.574062454936394	10.408162635854408	10.531894378789742	10.57395718317765	10.689450226757286	10.502942895994778	10.635051585320133	10.583389051712702	10.761302816875856
Con_Pmod_vs_Con_Scr	O43399|96	O43399	TPD52L2	S	96	LKQNLSRSWHDVQVS	-0.0713084	16.399014136418824	-1.05461	0.3151363103852308	0.6033941539142801	-5.92448	16.48501191707846	16.453572033347072	16.446953996976973	16.52424614496813	16.20391898139319	16.44344762317162	16.42450517420947	16.43163290615273	16.354326410027863	16.311925061783544	16.304823802522005	16.403805585394817
Con_Pmod_vs_Con_Scr	O43422|141	O43422	THAP12	S	141	NSNAQNPSEEEGEGQ	0.0174259	13.89803275627001	0.6160256379370694	0.5509241176445292	0.7823676424517219	-6.29014	13.864080188655342	13.865715165364968	13.865365023765474	13.88569067859146	13.877785193891771	13.883962237675606	14.02563145487531	13.958012762164422	14.040731456303355	13.837782774764054	13.870539091039868	13.801097048148494
Con_Pmod_vs_Con_Scr	O43426|1220	O43426	SYNJ1	T	1220	RASAGRLTPESQSKT	0.0530819	14.674310702980621	0.9459225565011179	0.36532874968859996	0.6466179227097213	-6.03048	14.711089208521296	14.558295393060256	14.65844354254432	14.748677862255724	14.626093093787336	14.71230300031774	14.660085786382696	14.530203750801132	14.683132293635454	14.762485844688186	14.786749625160803	14.654169034612504
Con_Pmod_vs_Con_Scr	O43426|1345	O43426	SYNJ1	S	1345	AQLSVQTSPVPTPDP	-0.00683544	15.62380047856061	-0.191868	0.8514845974583051	0.9385884498079021	-6.46985	15.657471385028952	15.64564133650424	15.66492832849587	15.699779116304471	15.591003708253425	15.6568	15.63718561539843	15.558016266626831	15.54574602426528	15.569305791661522	15.620006326322525	15.639769946247284
Con_Pmod_vs_Con_Scr	O43426|1391	O43426	SYNJ1	S	1391	QSQENMRSSPNPFIT	0.013383963651101283	16.849220589665364	0.21734022751733204	0.8320850914688106	0.9297885916583282	-6.4643	17.040889419230805	16.78500303090411	16.970389281306574	17.01870734473882	16.861641889165572	16.956084388490403	16.82425010033469	16.72740091564018	16.768172527590142	16.764661752837366	16.75946632881093	16.713980096934794
Con_Pmod_vs_Con_Scr	O43426|1565	O43426	SYNJ1	S	1565	TTLASKASPTLDFTE	-0.0289204	17.98065186404824	-1.35085	0.20497768089514165	0.4939764361307463	-5.59076	18.01873211607627	18.045049177408224	18.0219	17.990950195685343	18.007157960522814	18.000781988157527	17.920370087480403	17.93290057141167	17.944490140319544	17.967179797594643	17.96336677228647	17.954973392180886
Con_Pmod_vs_Con_Scr	O43432:P48506|240:70	O43432:P48506	EIF4G3:GCLC	S	240:70	PVLRLVLSGEKKEQE:KKVRLVLSGEKVLET	-0.148711	12.767614956286208	-1.42276	0.18366623783210217	0.4694910366035994	-5.50086	12.802463134906503	12.71022651981639	12.775189136619328	12.716505905069406	12.480565570475436	12.64467414415193	12.919852251678908	12.549603337425204	12.912625702244553	12.887382170712268	13.052938954743748	12.759352647590816
Con_Pmod_vs_Con_Scr	O43432|1198;1201	O43432	EIF4G3	T;S	1198;1201	TEAERNKTRESAKPE;ERNKTRESAKPEISA	0.00194235	19.65277663719395	0.014680509232334348	0.988561	0.9955326325395819	-6.48939	19.60797036115259	19.765858119408524	19.571174261755196	19.53150274753422	19.745075376512737	19.67425165528823	19.45947431176421	19.542526423180387	19.93649748634042	19.83019593495096	19.751315615334647	19.41747735310524
Con_Pmod_vs_Con_Scr	O43432|1409	O43432	EIF4G3	S	1409	LDFIESDSPCSSEAL	-0.0570128	16.451472726783518	-0.8355	0.4219365534419277	0.6921734089487425	-6.12816	16.58687743605959	16.56645537233786	16.51337212888611	16.61980192480349	16.303825892554006	16.572038777216665	16.34823560129862	16.40490726214079	16.44269937242828	16.389504995745416	16.33239281499006	16.337561142941322
Con_Pmod_vs_Con_Scr	O43432|1582	O43432	EIF4G3	S	1582	LREAEEESEDN____	-0.101155	17.1955	-3.07814	0.010987330301688164	0.11054326218161872	-2.9041	17.271430277067893	17.25455412787763	17.28747980604674	17.152485730353195	17.204313941192662	17.153198523077545	17.25927173696368	17.157593426204855	17.232883224885914	17.112708432151912	17.166914594390143	17.0937
Con_Pmod_vs_Con_Scr	O43432|232	O43432	EIF4G3	S	232	DPVLKSPSPVLRLVL	-0.121961	15.200126563082476	-3.05574	0.011426830921535703	0.11211029635199551	-2.9422	15.272653456113131	15.255368579359867	15.285262054106834	15.136156722776096	15.175128583464154	15.136115418721191	15.233754752425904	15.101578244196164	15.225564866595333	15.186572522012437	15.25319137838126	15.140172178837332
Con_Pmod_vs_Con_Scr	O43432|305	O43432	EIF4G3	S	305	DDRCELSSPREDTIP	-0.0134272	18.533149932258866	-0.338216	0.741828	0.885517	-6.42865	18.6478	18.733969393240056	18.651217124166315	18.72248599173983	18.57358575014247	18.69660182288308	18.19223648905549	18.165103832614225	18.197390331375303	18.58584393329596	18.616114323723604	18.615481461264437
Con_Pmod_vs_Con_Scr	O43432|495	O43432	EIF4G3	S	495	QNLNSRRSPVPAQIA	-0.0379737	19.823231416501542	-1.52487	0.15666376534672447	0.4350855675524433	-5.36796	19.84721442357394	19.837571849570708	19.83516969680629	19.82951975847925	19.761954860780833	19.814560237717377	19.865973002378137	19.88685960120473	19.859277851146377	19.77914189343461	19.765551688533883	19.795982134392393
Con_Pmod_vs_Con_Scr	O43432|536	O43432	EIF4G3	S	536	LKAEEELSIDKVLES	-0.119419	12.468420930010797	-1.03794	0.32248010409714367	0.6101935272948562	-5.94134	12.295745799786122	12.435288525975972	12.438715376868958	12.074235543795352	12.575751364018206	12.161506908066327	12.611752643871135	12.382778383604196	12.522124782622967	12.644209822334933	12.822484467028938	12.656457542156472
Con_Pmod_vs_Con_Scr	O43439|409	O43439	CBFA2T2	S	409	ELVSRQHSPGSADSL	-0.106513	12.699873035484769	-2.42997	0.034257168980424246	0.2046129549961991	-3.99498	12.6347	12.691837472096696	12.646848310431412	12.534899017352023	12.565960047579406	12.55299498060755	12.883932559179382	12.791770752585226	12.95137128418393	12.724939623001587	12.775929715470646	12.643284244999965
Con_Pmod_vs_Con_Scr	O43491|38	O43491	EPB41L2	S	38	AENQQNQSSDPEEEK	-0.0236087	13.651189574511669	-0.591125	0.5668733615791779	0.7914009327890049	-6.30567	14.01247373969857	14.022489026871977	14.026909898381405	13.92617557027043	14.094948698727752	13.969922313708954	13.259954322071687	13.333893380574546	13.28726052646148	13.31046489161306	13.27398253852186	13.295799987238308
Con_Pmod_vs_Con_Scr	O43491|386	O43491	EPB41L2	S	386	HKTHRGLSPAQADSQ	0.015474678302309641	15.048337425190123	0.525693	0.6099622707669103	0.8186580553251872	-6.34361	15.096695400270663	15.163255793741056	15.132809973125376	15.141956740199866	15.159292725793073	15.137935736051086	14.98251426181925	14.90836249532773	14.934301291895856	14.93868850116459	15.001286888635198	14.982949294257736
Con_Pmod_vs_Con_Scr	O43491|499	O43491	EPB41L2	S	499	HTFYRLVSPEQPPKA	0.12022909450165642	15.105440140430657	1.736032372674957	0.11159515528943065	0.36894265362849143	-5.07553	15.29112911754253	15.466408360482314	15.363455927707289	15.363716814841144	15.667007512234097	15.450956362161865	14.57004854115676	14.58042312635083	14.642152080491476	14.958283307617704	14.989856428053995	14.921844106527878
Con_Pmod_vs_Con_Scr	O43491|529	O43491	EPB41L2	S	529	QAQTRQASTLIDRPA	0.3147472355685146	18.241017088101135	6.142497313006061	8.674465655723875e-5	0.010244136665737152	1.8478860782145192	18.22700360796625	18.419809993919756	18.239820785968934	18.60241025903063	18.58865028657123	18.63981554895862	18.07942955125812	18.18630398081861	18.21295202143271	17.918811320018534	17.88708164153835	17.890116059731877
Con_Pmod_vs_Con_Scr	O43491|550	O43491	EPB41L2	S	550	SSKRVSRSLDGAPIG	-0.0298	11.340407720446972	-0.647146	0.5313520679376618	0.7714464584987528	-6.26989	11.521622416781613	11.46658759275444	11.54090504290576	11.431595513758626	11.565804761005138	11.44231477906444	11.178657380823813	11.221408722417456	11.091015425131683	11.190887739294856	11.173165776154995	11.260927495270842
Con_Pmod_vs_Con_Scr	O43491|58	O43491	EPB41L2	S	58	PAAESQSSLRRQKRE	0.0611959	16.952464746602647	2.0992954262589247	0.0607029	0.27631107872906957	-4.52789	17.124757061075638	17.20783028492746	17.13933944322196	17.193298980146242	17.24269985747434	17.219515655814654	16.71540530473346	16.77158206658707	16.762593871267157	16.690786785467182	16.674856484002575	16.686911164514047
Con_Pmod_vs_Con_Scr	O43491|598	O43491	EPB41L2	S	598	DGRREVRSPTKAPHL	0.029274722515165053	16.92531257895123	0.39226786754898085	0.7026609826434649	0.8691084118153801	-6.4078	17.311368481529026	17.287391452569324	17.34981328592367	17.264452393120276	17.47408956960871	17.29785542483852	16.37921613114799	16.163244756619005	16.38175481316669	16.729326252665167	16.83997604691108	16.625262339315334
Con_Pmod_vs_Con_Scr	O43491|614	O43491	EPB41L2	S	614	LIEGKKNSLRVEGDN	-0.0557715	20.1941	-0.741334	0.47465367594565777	0.7308354157817231	-6.20307	20.424283370777314	20.68878377215576	20.43809974415589	20.42928531391064	20.455508698651645	20.49905835723141	19.966622720829612	20.077514912395756	20.20924156100968	19.763362875552463	19.729620011860803	19.648354608656213
Con_Pmod_vs_Con_Scr	O43491|647	O43491	EPB41L2	S	647	DILKHQASISELKRN	0.21602144442988092	20.21472741828435	2.31152	0.0421042	0.22645511260323925	-4.18872	20.225396078323108	20.618645047062262	20.26243984172508	20.62632310371844	20.47243953730555	20.655782659376108	19.92793143495907	20.00966564645959	20.116885560585487	19.88477554426257	19.90142755607891	19.87501700955605
Con_Pmod_vs_Con_Scr	O43491|683	O43491	EPB41L2	S	683	SLQTQGSSHETLNIV	-0.154534	18.2645	-2.46672	0.032127	0.19742832118526568	-3.93435	18.660257543273197	18.84971969189804	18.75279272407509	18.506896939322623	18.73357557184803	18.55869645337131	17.858724790029175	17.769236978776373	17.84031911926103	17.837265315737703	17.93705063638152	17.869289282983495
Con_Pmod_vs_Con_Scr	O43491|715	O43491	EPB41L2	S	715	EMNGKEISPGSGPGE	0.00336631	15.2338	0.060288	0.9530519815818292	0.9808425196382462	-6.48757	15.443785079195296	15.553130547021068	15.519377782230096	15.415667252423678	15.649788082949048	15.460937003912775	14.918869693385268	14.842952366458029	14.879707486889936	15.00504923747026	15.082310808822433	15.0339
Con_Pmod_vs_Con_Scr	O43491|718	O43491	EPB41L2	S	718	GKEISPGSGPGEIRK	0.021573437929712114	12.672664583064273	0.4365657024999029	0.6712175027301843	0.8539797077292465	-6.38848	12.843490966790508	12.878019575224668	12.854578999944083	12.873362286204769	12.890804345545083	12.876643223998544	12.44457902431582	12.58265748889167	12.397688302506888	12.460484872819931	12.40528329539055	12.564382615138772
Con_Pmod_vs_Con_Scr	O43491|87	O43491	EPB41L2	S	87	PWLKKQKSYTLVVAK	0.11336952828565217	21.13487235245295	2.05658	0.0652928	0.28562778378781095	-4.59467	21.466902859602207	21.665431764502845	21.485109758857988	21.65643314883724	21.61645435135044	21.684665467632296	20.77540643229257	20.780205386464445	20.910440765900685	20.538714927337782	20.560374576566808	20.478328790090064
Con_Pmod_vs_Con_Scr	O43493|224	O43493	TGOLN2	S	224	PKDGSNKSGAEEQGP	0.0319114	11.473733639673249	0.49357585921426655	0.6317094569332553	0.8314511742768858	-6.3607	11.307107657298214	11.293288185679584	11.38305727742948	11.297028323831372	11.4872	11.294939554844982	11.591476899151647	11.415056552956685	11.404600771086612	11.661436186781586	11.78470012688912	11.764892552808895
Con_Pmod_vs_Con_Scr	O43493|298	O43493	TGOLN2	S	298	PHAFKTESGEETDLI	-0.0380473	18.955438751679907	-1.22372	0.24765983318805895	0.5378911997340535	-5.74152	18.874538581451795	18.948121906634036	18.917892554104736	18.858531010060585	18.90772851091437	18.860151508943336	19.09444727628626	19.04904323896636	19.03139291037886	18.93421501466821	18.98677330414576	19.002429203604557
Con_Pmod_vs_Con_Scr	O43493|314	O43493	TGOLN2	S	314	PPQEEVKSSEPTEDV	0.0738185	14.7131	1.3064470543676572	0.21913686952611242	0.5092430029052099	-5.64463	14.460848321981896	14.412827694727174	14.516163946420482	14.507626090339544	14.6174	14.486289750455352	14.982974679068274	14.84216968520259	14.785381757135315	14.908914105347518	15.005470006283325	15.030938380260812
Con_Pmod_vs_Con_Scr	O43493|351	O43493	TGOLN2	S	351	EKMSGSASSENREGT	0.0735081	18.023827090484662	1.5069947315747143	0.1611273136050641	0.4410644178855507	-5.39166	17.872774128121918	17.88322839541312	17.88399770618564	17.877808224251112	18.053854881390144	17.928861540926572	18.177163205991413	18.149234830294873	18.261133637717577	18.098954129733997	18.106208000132636	17.992706405656936
Con_Pmod_vs_Con_Scr	O43493|352	O43493	TGOLN2	S	352	KMSGSASSENREGTL	0.00901342	14.99747464799413	0.19143475632759022	0.8518157958472828	0.9387967358423757	-6.46994	14.916716378777163	14.83489395243362	14.932929312753084	14.843934915181228	15.006109475771558	14.861535515391685	15.208962411648695	15.114406108296972	15.169348986629148	15.025809004320568	15.06560289942238	14.98944681530346
Con_Pmod_vs_Con_Scr	O43493|70	O43493	TGOLN2	S	70	PKDSPSKSSAEAQTP	-0.0751216	17.989181975869812	-0.795393	0.4438948024172197	0.7092	-6.16103	17.787543179393907	17.942904532820467	17.909680337787645	17.732208626171793	17.93512325538178	17.747431407367426	18.05593308272033	17.708244301449046	17.93348490843184	18.279053588124356	18.52104431411765	18.317532176671524
Con_Pmod_vs_Con_Scr	O43493|71	O43493	TGOLN2	S	71	KDSPSKSSAEAQTPE	0.0390659	15.303184124781458	0.8554128649742376	0.41131005306015145	0.6838681717122977	-6.11132	15.122281554301871	15.04660875810306	15.11960691518216	15.068786805714424	15.233473862988577	15.10343414150518	15.503268265482836	15.468081298857456	15.540072678798834	15.508352400826835	15.506346758173793	15.417896057442473
Con_Pmod_vs_Con_Scr	O43520|483	O43520	ATP8B1	S	483	YGDHRDASQHNHNKI	0.16995591835561719	13.790078631430175	1.9855603498528263	0.0736566	0.3003606830011191	-4.70445	13.572984864110758	13.92915623163042	13.724714171351993	13.845316701824448	14.014142773686627	13.877263546648948	13.817767713653764	13.690794542570934	13.706583041527807	13.65148576621596	13.82429714591272	13.826437078027714
Con_Pmod_vs_Con_Scr	O43524|425	O43524	FOXO3	S	425	TKGSGLGSPTSSFNS	-0.05881	15.405693434707292	-1.59584	0.13998806987043386	0.41264906705889387	-5.27218	15.43121013877668	15.28084113360947	15.385817211455802	15.32936009408657	15.282305463974078	15.309772822586606	15.46425527183846	15.44049362075258	15.467151830622234	15.52024225228286	15.495173468443443	15.461697908058722
Con_Pmod_vs_Con_Scr	O43572|187	O43572	AKAP10	S	187	SSLAEPVSPSKKHET	-0.0243459	19.088175337118408	-0.733502	0.4792192435524031	0.7349476025202418	-6.20894	19.086097281633162	19.173383653429187	19.1125	19.07006801872039	19.134477607466685	19.094425448456583	19.029863418744057	18.992781783308963	19.069888724643548	19.09601327914783	19.13093087528624	19.06764611580353
Con_Pmod_vs_Con_Scr	O43572|281	O43572	AKAP10	S	281	ASRNSPASPLKELSG	0.038068	15.485718126196947	0.5697221293481401	0.580783	0.799718	-6.31854	15.34506684158356	15.42690750551824	15.324087243321951	15.464051457751896	15.29900715404208	15.44720695118323	15.51114971869723	15.71421166784545	15.53245631489242	15.588605410038769	15.495541513109467	15.680325736379068
Con_Pmod_vs_Con_Scr	O43572|96	O43572	AKAP10	S	96	ATLKKQPSHMEAAHF	-0.103502	11.101274796606091	-4.43301	0.00111089	0.035334206933153076	-0.652114	11.121237631766071	11.059044146224224	11.106302591848571	10.99625912372062	10.990495176446544	10.9893	11.207717663548229	11.200561501967172	11.198828295043665	11.123286791476064	11.11351125073337	11.108729604458762
Con_Pmod_vs_Con_Scr	O43583|73	O43583	DENR	S	73	AKLTVENSPKQEAGI	-0.0177706	17.273128693332602	-0.710637	0.4927052259058803	0.7458331690882527	-6.22575	17.174275859202623	17.11617417737738	17.149346675343793	17.149558329906903	17.09931214284739	17.13761437159579	17.45968401455644	17.459072772179294	17.471641891994196	17.368328351735716	17.351673231415816	17.340862501835858
Con_Pmod_vs_Con_Scr	O43583|81	O43583	DENR	S	81	PKQEAGISEGQGTAG	0.024377209763862595	13.196938725440702	0.36527580401781007	0.7221156793692172	0.8773061102831653	-6.41859	13.161911291823774	13.132826562390964	13.09729081662089	13.230993044192342	13.027696408755196	13.206470847179672	13.25979255402791	13.471316837523842	13.319164584830665	13.188306315853866	13.057294361578128	13.21020108051118
[truncated: 78,169 more rows]

## Sheet: Sample Z-scores
Phospho_ID	Uniprot_Accession	Gene_Name	Phospho_Type	Phospho_Sequence_Position	Phospho_Sequence_15mer	C4_ASO-S_1	C4_ASO-S_2	C4_ASO-S_3	C4_ASO-T_1	C4_ASO-T_2	C4_ASO-T_3	II:3_ASO-S_1	II:3_ASO-S_2	II:3_ASO-S_3	II:3_ASO-T_1	II:3_ASO-T_2	II:3_ASO-T_3
[truncated: 13,200 more rows]

## Sheet: Filtered restored phosphopeps
							Individual sample z-scores												Mean z-score				For comparison Pat_Pmod vs Pat_Scr
[truncated: 506 more rows]
