# Supplementary material for: A severe neurodevelopmental syndrome linked to a South Asian founder variant in the UFMylation adaptor CDK5RAP3
Source: Acta Neuropathol. 2026 Apr 27;151(1):48. doi: 10.1007/s00401-026-03017-2 (PMC13121207; doi:10.1007/s00401-026-03017-2)
Supplement: Supplementary file 6 — Supplementary file6 (XLSX 43 KB) [file 401_2026_3017_MOESM6_ESM.xlsx]

## Sheet: Upregulated
GroupID	Category	Term	Description	LogP	Log(q-value)	Genes	Symbols	InTerm_InList	≥ 3 Unambiguously mapped proteins	Q-value < 0.05
5_Summary	GO Biological Processes	GO:0030036	actin cytoskeleton organization	-4.17838	-1.32381	800,1264,1525,25802,55740,345651,2633,1281	CALD1,CNN1,CXADR,LMOD1,ENAH,ACTBL2,GBP1,COL3A1	8/-	TRUE	TRUE
5_Member	GO Biological Processes	GO:0030036	actin cytoskeleton organization	-4.17838	-1.32381	800,1264,1525,25802,55740,345651	CALD1,CNN1,CXADR,LMOD1,ENAH,ACTBL2	6/546	TRUE	TRUE
2_Member	GO Molecular Functions	GO:0016817	hydrolase activity, acting on acid anhydrides	-4.19068	-1.32381	1917,2633,2634,2635,22875,55964,664618	EEF1A2,GBP1,GBP2,GBP3,ENPP4,SEPTIN3,HSP90AB4P	7/799	TRUE	TRUE
2_Member	GO Molecular Functions	GO:0016818	hydrolase activity, acting on acid anhydrides, in phosphorus-containing anhydrides	-4.19068	-1.32381	1917,2633,2634,2635,22875,55964,664618	EEF1A2,GBP1,GBP2,GBP3,ENPP4,SEPTIN3,HSP90AB4P	7/799	TRUE	TRUE
2_Member	GO Molecular Functions	GO:0016462	pyrophosphatase activity	-4.20094	-1.32381	1917,2633,2634,2635,22875,55964,664618	EEF1A2,GBP1,GBP2,GBP3,ENPP4,SEPTIN3,HSP90AB4P	7/796	TRUE	TRUE
1_Member	GO Cellular Components	GO:0031252	cell leading edge	-2.62121	-0.239606	1464,3691,8874,55740	CSPG4,ITGB4,ARHGEF7,ENAH	4/438	TRUE	FALSE
1_Member	GO Cellular Components	GO:0030027	lamellipodium	-2.60618	-0.230562	1464,8874,55740	CSPG4,ARHGEF7,ENAH	3/209	TRUE	FALSE
1_Member	KEGG Pathway	hsa04810	Regulation of actin cytoskeleton	-2.47839	-0.136662	3691,8874,55740	ITGB4,ARHGEF7,ENAH	3/232	TRUE	FALSE
1_Member	GO Biological Processes	GO:0120031	plasma membrane bounded cell projection assembly	-1.6885	0	1464,3691,8874	CSPG4,ITGB4,ARHGEF7	3/453	TRUE	FALSE
1_Member	GO Biological Processes	GO:0030031	cell projection assembly	-1.65409	0	1464,3691,8874	CSPG4,ITGB4,ARHGEF7	3/467	TRUE	FALSE
1_Member	Reactome Gene Sets	R-HSA-9734779	Developmental Cell Lineages of the Integumentary System	-4.25723	-1.34995	1264,1464,3691	CNN1,CSPG4,ITGB4	3/57	TRUE	TRUE
2_Member	GO Biological Processes	GO:0051715	cytolysis in another organism	-6.78061	-2.99695	2633,2634,2635	GBP1,GBP2,GBP3	3/9	FALSE	TRUE
2_Member	GO Biological Processes	GO:0140639	positive regulation of pyroptotic inflammatory response	-6.78061	-2.99695	2633,2634,2635	GBP1,GBP2,GBP3	3/9	FALSE	TRUE
2_Member	GO Biological Processes	GO:0019835	cytolysis	-6.25008	-2.69654	2633,2634,2635	GBP1,GBP2,GBP3	3/13	FALSE	TRUE
3_Member	Reactome Gene Sets	R-HSA-1474244	Extracellular matrix organization	-4.27144	-1.34995	1281,1282,1284,3691,5644	COL3A1,COL4A1,COL4A2,ITGB4,PRSS1	5/318	TRUE	TRUE
3_Member	Reactome Gene Sets	R-HSA-1474228	Degradation of the extracellular matrix	-4.52039	-1.58416	1281,1282,1284,5644	COL3A1,COL4A1,COL4A2,PRSS1	4/138	TRUE	TRUE
3_Member	Reactome Gene Sets	R-HSA-8948216	Collagen chain trimerization	-4.59644	-1.64497	1281,1282,1284	COL3A1,COL4A1,COL4A2	3/44	TRUE	TRUE
2_Member	GO Molecular Functions	GO:0003924	GTPase activity	-4.12824	-1.29971	1917,2633,2634,2635,55964	EEF1A2,GBP1,GBP2,GBP3,SEPTIN3	5/341	TRUE	FALSE
2_Member	GO Molecular Functions	GO:0005525	GTP binding	-3.90765	-1.1218	1917,2633,2634,2635,55964	EEF1A2,GBP1,GBP2,GBP3,SEPTIN3	5/380	TRUE	FALSE
2_Member	GO Molecular Functions	GO:0019001	guanyl nucleotide binding	-3.78375	-1.04788	1917,2633,2634,2635,55964	EEF1A2,GBP1,GBP2,GBP3,SEPTIN3	5/404	TRUE	FALSE
2_Member	GO Molecular Functions	GO:0032561	guanyl ribonucleotide binding	-3.78375	-1.04788	1917,2633,2634,2635,55964	EEF1A2,GBP1,GBP2,GBP3,SEPTIN3	5/404	TRUE	FALSE
2_Member	GO Biological Processes	GO:0071347	cellular response to interleukin-1	-3.77034	-1.04649	2633,2634,2635	GBP1,GBP2,GBP3	3/83	FALSE	FALSE
2_Member	GO Biological Processes	GO:0009615	response to virus	-3.71994	-1.02887	1525,2633,2634,2635,8091	CXADR,GBP1,GBP2,GBP3,HMGA2	5/417	TRUE	FALSE
2_Member	GO Biological Processes	GO:0071346	cellular response to type II interferon	-3.68065	-0.99829	2633,2634,2635	GBP1,GBP2,GBP3	3/89	FALSE	FALSE
2_Member	Reactome Gene Sets	R-HSA-877300	Interferon gamma signaling	-3.58362	-0.933177	2633,2634,2635	GBP1,GBP2,GBP3	3/96	FALSE	FALSE
2_Member	GO Molecular Functions	GO:0017111	ribonucleoside triphosphate phosphatase activity	-3.47479	-0.868551	1917,2633,2634,2635,55964,664618	EEF1A2,GBP1,GBP2,GBP3,SEPTIN3,HSP90AB4P	6/736	TRUE	FALSE
2_Member	GO Biological Processes	GO:0070555	response to interleukin-1	-3.3984	-0.79911	2633,2634,2635	GBP1,GBP2,GBP3	3/111	TRUE	FALSE
2_Member	GO Biological Processes	GO:0034341	response to type II interferon	-3.34242	-0.769858	2633,2634,2635	GBP1,GBP2,GBP3	3/116	FALSE	FALSE
2_Member	GO Biological Processes	GO:0051607	defense response to virus	-3.21531	-0.674012	1525,2633,2634,2635	CXADR,GBP1,GBP2,GBP3	4/302	FALSE	FALSE
2_Member	GO Biological Processes	GO:0031640	killing of cells of another organism	-3.17887	-0.666729	2633,2634,2635	GBP1,GBP2,GBP3	3/132	FALSE	FALSE
2_Member	GO Biological Processes	GO:0141061	disruption of cell in another organism	-3.17887	-0.666729	2633,2634,2635	GBP1,GBP2,GBP3	3/132	FALSE	FALSE
2_Member	GO Biological Processes	GO:0141060	disruption of anatomical structure in another organism	-3.14123	-0.640221	2633,2634,2635	GBP1,GBP2,GBP3	3/136	FALSE	FALSE
2_Member	GO Biological Processes	GO:0071356	cellular response to tumor necrosis factor	-2.96895	-0.508856	2633,2634,2635	GBP1,GBP2,GBP3	3/156	FALSE	FALSE
2_Member	GO Biological Processes	GO:0034612	response to tumor necrosis factor	-2.79755	-0.381192	2633,2634,2635	GBP1,GBP2,GBP3	3/179	FALSE	FALSE
2_Member	GO Biological Processes	GO:0050729	positive regulation of inflammatory response	-2.79755	-0.381192	2633,2634,2635	GBP1,GBP2,GBP3	3/179	FALSE	FALSE
2_Member	KEGG Pathway	hsa04621	NOD-like receptor signaling pathway	-2.7302	-0.327196	2633,2634,2635	GBP1,GBP2,GBP3	3/189	FALSE	FALSE
2_Member	GO Biological Processes	GO:0001906	cell killing	-2.66653	-0.276492	2633,2634,2635	GBP1,GBP2,GBP3	3/199	FALSE	FALSE
2_Member	GO Cellular Components	GO:0048471	perinuclear region of cytoplasm	-2.60389	-0.230562	2634,2635,7059,8987,664618	GBP2,GBP3,THBS3,STBD1,HSP90AB4P	5/739	TRUE	FALSE
2_Member	GO Biological Processes	GO:0050727	regulation of inflammatory response	-2.54458	-0.187889	2633,2634,2635,10162	GBP1,GBP2,GBP3,LPCAT3	4/460	FALSE	FALSE
2_Member	Reactome Gene Sets	R-HSA-913531	Interferon Signaling	-2.26815	0	2633,2634,2635	GBP1,GBP2,GBP3	3/276	FALSE	FALSE
2_Member	GO Biological Processes	GO:0051604	protein maturation	-2.18866	0	2633,2634,135154,664618	GBP1,GBP2,SDHAF4,HSP90AB4P	4/580	TRUE	FALSE
2_Member	GO Biological Processes	GO:0042742	defense response to bacterium	-2.01321	0	2633,2634,2635	GBP1,GBP2,GBP3	3/342	FALSE	FALSE
2_Member	GO Cellular Components	GO:0000139	Golgi membrane	-1.90071	0	2530,2633,2634,2635	FUT8,GBP1,GBP2,GBP3	4/704	FALSE	FALSE
2_Member	GO Biological Processes	GO:0031349	positive regulation of defense response	-1.5468	0	2633,2634,2635	GBP1,GBP2,GBP3	3/514	FALSE	FALSE
2_Member	GO Biological Processes	GO:0032103	positive regulation of response to external stimulus	-1.30514	0	2633,2634,2635	GBP1,GBP2,GBP3	3/642	FALSE	FALSE
3_Member	GO Molecular Functions	GO:0030020	extracellular matrix structural constituent conferring tensile strength	-4.65775	-1.69048	1281,1282,1284	COL3A1,COL4A1,COL4A2	3/42	TRUE	TRUE
3_Member	Reactome Gene Sets	R-HSA-2173782	Binding and Uptake of Ligands by Scavenger Receptors	-4.65775	-1.69048	1281,1282,1284	COL3A1,COL4A1,COL4A2	3/42	TRUE	TRUE
3_Member	Reactome Gene Sets	R-HSA-419037	NCAM1 interactions	-4.65775	-1.69048	1281,1282,1284	COL3A1,COL4A1,COL4A2	3/42	TRUE	TRUE
3_Member	KEGG Pathway	hsa04974	Protein digestion and absorption	-4.98794	-1.96952	1281,1282,1284,5644	COL3A1,COL4A1,COL4A2,PRSS1	4/105	TRUE	TRUE
3_Member	Reactome Gene Sets	R-HSA-3000157	Laminin interactions	-5.10451	-2.06761	1282,1284,3691	COL4A1,COL4A2,ITGB4	3/30	TRUE	TRUE
4_Member	GO Biological Processes	GO:0034330	cell junction organization	-5.11417	-2.06761	1282,1525,3691,3897,8874,55740,345651	COL4A1,CXADR,ITGB4,L1CAM,ARHGEF7,ENAH,ACTBL2	7/573	TRUE	TRUE
3_Member	Reactome Gene Sets	R-HSA-9675108	Nervous system development	-5.18409	-2.10767	1281,1282,1284,3897,7436,8874,55740	COL3A1,COL4A1,COL4A2,L1CAM,VLDLR,ARHGEF7,ENAH	7/559	TRUE	TRUE
3_Member	GO Cellular Components	GO:0098644	complex of collagen trimers	-5.24575	-2.14814	1281,1282,1284	COL3A1,COL4A1,COL4A2	3/27	TRUE	TRUE
3_Member	Reactome Gene Sets	R-HSA-1474290	Collagen formation	-5.27328	-2.1534	1281,1282,1284,3691	COL3A1,COL4A1,COL4A2,ITGB4	4/89	TRUE	TRUE
3_Member	KEGG Pathway	hsa04512	ECM-receptor interaction	-5.27328	-2.1534	1282,1284,3691,7059	COL4A1,COL4A2,ITGB4,THBS3	4/89	TRUE	TRUE
3_Member	Reactome Gene Sets	R-HSA-422475	Axon guidance	-5.31382	-2.1534	1281,1282,1284,3897,7436,8874,55740	COL3A1,COL4A1,COL4A2,L1CAM,VLDLR,ARHGEF7,ENAH	7/534	TRUE	TRUE
4_Member	GO Biological Processes	GO:0031589	cell-substrate adhesion	-5.40349	-2.20898	1281,3691,3897,7059,8874	COL3A1,ITGB4,L1CAM,THBS3,ARHGEF7	5/185	TRUE	TRUE
3_Member	Reactome Gene Sets	R-HSA-3000171	Non-integrin membrane-ECM interactions	-5.45825	-2.23571	1281,1282,1284,3691	COL3A1,COL4A1,COL4A2,ITGB4	4/80	TRUE	TRUE
3_Member	Reactome Gene Sets	R-HSA-1566977	Fibronectin matrix formation	-5.65226	-2.39975	1281,1282,1284	COL3A1,COL4A1,COL4A2	3/20	TRUE	TRUE
3_Member	Reactome Gene Sets	R-HSA-3000480	Scavenging by Class A Receptors	-5.72245	-2.43776	1281,1282,1284	COL3A1,COL4A1,COL4A2	3/19	TRUE	TRUE
1_Member	GO Cellular Components	GO:0030055	cell-substrate junction	-5.9143	-2.59484	1264,1464,3691,3897,4162,8874,55740	CNN1,CSPG4,ITGB4,L1CAM,MCAM,ARHGEF7,ENAH	7/433	TRUE	TRUE
3_Member	Reactome Gene Sets	R-HSA-2022090	Assembly of collagen fibrils and other multimeric structures	-5.96121	-2.60396	1281,1282,1284,3691	COL3A1,COL4A1,COL4A2,ITGB4	4/60	TRUE	TRUE
1_Member	GO Cellular Components	GO:0005925	focal adhesion	-5.98178	-2.60396	1264,1464,3691,3897,4162,8874,55740	CNN1,CSPG4,ITGB4,L1CAM,MCAM,ARHGEF7,ENAH	7/423	TRUE	TRUE
3_Member	Reactome Gene Sets	R-HSA-186797	Signaling by PDGF	-6.02085	-2.60396	1281,1282,1284,7059	COL3A1,COL4A1,COL4A2,THBS3	4/58	TRUE	TRUE
4_Summary	GO Biological Processes	GO:0007160	cell-matrix adhesion	-6.04459	-2.60396	1281,3691,3897,7059,8874,1282,1525,55740,345651,7436	COL3A1,ITGB4,L1CAM,THBS3,ARHGEF7,COL4A1,CXADR,ENAH,ACTBL2,VLDLR	10/-	TRUE	TRUE
4_Member	GO Biological Processes	GO:0007160	cell-matrix adhesion	-6.04459	-2.60396	1281,3691,3897,7059,8874	COL3A1,ITGB4,L1CAM,THBS3,ARHGEF7	5/137	TRUE	TRUE
3_Member	KEGG Pathway	hsa04820	Cytoskeleton in muscle cells	-6.29688	-2.69654	1281,1282,1284,3691,7059,25802	COL3A1,COL4A1,COL4A2,ITGB4,THBS3,LMOD1	6/232	TRUE	TRUE
3_Member	Reactome Gene Sets	R-HSA-375165	NCAM signaling for neurite out-growth	-4.12691	-1.29971	1281,1282,1284	COL3A1,COL4A1,COL4A2	3/63	TRUE	FALSE
3_Member	GO Molecular Functions	GO:0005201	extracellular matrix structural constituent	-4.11856	-1.29971	1281,1282,1284,7059	COL3A1,COL4A1,COL4A2,THBS3	4/175	TRUE	FALSE
3_Member	Reactome Gene Sets	R-HSA-1442490	Collagen degradation	-4.10645	-1.29888	1281,1282,1284	COL3A1,COL4A1,COL4A2	3/64	TRUE	FALSE
3_Member	Reactome Gene Sets	R-HSA-1650814	Collagen biosynthesis and modifying enzymes	-4.04699	-1.25042	1281,1282,1284	COL3A1,COL4A1,COL4A2	3/67	TRUE	FALSE
3_Member	Reactome Gene Sets	R-HSA-3000178	ECM proteoglycans	-3.8839	-1.11471	1281,1282,1284	COL3A1,COL4A1,COL4A2	3/76	TRUE	FALSE
3_Member	KEGG Pathway	hsa04510	Focal adhesion	-3.86989	-1.11471	1282,1284,3691,7059	COL4A1,COL4A2,ITGB4,THBS3	4/203	TRUE	FALSE
3_Member	Reactome Gene Sets	R-HSA-216083	Integrin cell surface interactions	-3.75493	-1.04649	1281,1282,1284	COL3A1,COL4A1,COL4A2	3/84	TRUE	FALSE
3_Member	GO Cellular Components	GO:0005581	collagen trimer	-3.72468	-1.02887	1281,1282,1284	COL3A1,COL4A1,COL4A2	3/86	TRUE	FALSE
3_Member	GO Biological Processes	GO:0007167	enzyme-linked receptor protein signaling pathway	-3.67265	-0.99829	1281,1282,1284,1464,2530,8874	COL3A1,COL4A1,COL4A2,CSPG4,FUT8,ARHGEF7	6/676	TRUE	FALSE
3_Member	GO Biological Processes	GO:0048514	blood vessel morphogenesis	-3.58956	-0.933177	1281,1282,1284,1464,4162	COL3A1,COL4A1,COL4A2,CSPG4,MCAM	5/445	TRUE	FALSE
3_Member	GO Biological Processes	GO:0035239	tube morphogenesis	-3.57465	-0.931887	1281,1282,1284,1464,4162,8091	COL3A1,COL4A1,COL4A2,CSPG4,MCAM,HMGA2	6/705	TRUE	FALSE
3_Member	GO Biological Processes	GO:0007229	integrin-mediated signaling pathway	-3.55725	-0.922044	1281,2530,3691	COL3A1,FUT8,ITGB4	3/98	TRUE	FALSE
3_Member	GO Cellular Components	GO:0005604	basement membrane	-3.53143	-0.903649	1282,1284,3691	COL4A1,COL4A2,ITGB4	3/100	TRUE	FALSE
3_Member	KEGG Pathway	hsa04933	AGE-RAGE signaling pathway in diabetic complications	-3.51872	-0.89824	1281,1282,1284	COL3A1,COL4A1,COL4A2	3/101	TRUE	FALSE
3_Member	KEGG Pathway	hsa05146	Amoebiasis	-3.49369	-0.880389	1281,1282,1284	COL3A1,COL4A1,COL4A2	3/103	TRUE	FALSE
3_Member	GO Biological Processes	GO:0030198	extracellular matrix organization	-3.386	-0.794267	1281,1282,1284,5644	COL3A1,COL4A1,COL4A2,PRSS1	4/272	TRUE	FALSE
3_Member	GO Biological Processes	GO:0043062	extracellular structure organization	-3.37999	-0.794267	1281,1282,1284,5644	COL3A1,COL4A1,COL4A2,PRSS1	4/273	TRUE	FALSE
3_Member	GO Biological Processes	GO:0045229	external encapsulating structure organization	-3.36804	-0.788949	1281,1282,1284,5644	COL3A1,COL4A1,COL4A2,PRSS1	4/275	TRUE	FALSE
3_Member	GO Biological Processes	GO:0001704	formation of primary germ layer	-3.23764	-0.688239	1284,3691,8091	COL4A2,ITGB4,HMGA2	3/126	TRUE	FALSE
3_Member	Reactome Gene Sets	R-HSA-9006934	Signaling by Receptor Tyrosine Kinases	-3.23561	-0.688239	1281,1282,1284,7059,8874	COL3A1,COL4A1,COL4A2,THBS3,ARHGEF7	5/532	TRUE	FALSE
3_Member	GO Biological Processes	GO:0001568	blood vessel development	-3.20634	-0.671027	1281,1282,1284,1464,4162	COL3A1,COL4A1,COL4A2,CSPG4,MCAM	5/540	TRUE	FALSE
3_Member	KEGG Pathway	hsa04926	Relaxin signaling pathway	-3.19815	-0.668743	1281,1282,1284	COL3A1,COL4A1,COL4A2	3/130	TRUE	FALSE
3_Member	GO Biological Processes	GO:0001944	vasculature development	-3.11788	-0.62893	1281,1282,1284,1464,4162	COL3A1,COL4A1,COL4A2,CSPG4,MCAM	5/565	TRUE	FALSE
3_Member	KEGG Pathway	hsa05165	Human papillomavirus infection	-3.05718	-0.577629	1282,1284,3691,7059	COL4A1,COL4A2,ITGB4,THBS3	4/333	TRUE	FALSE
3_Member	GO Biological Processes	GO:0001525	angiogenesis	-2.96797	-0.508856	1282,1284,1464,4162	COL4A1,COL4A2,CSPG4,MCAM	4/352	TRUE	FALSE
3_Member	KEGG Pathway	hsa04151	PI3K-Akt signaling pathway	-2.92311	-0.468955	1282,1284,3691,7059	COL4A1,COL4A2,ITGB4,THBS3	4/362	TRUE	FALSE
3_Member	GO Biological Processes	GO:0071560	cellular response to transforming growth factor beta stimulus	-2.89889	-0.449641	1281,1284,2530	COL3A1,COL4A2,FUT8	3/165	TRUE	FALSE
3_Member	GO Biological Processes	GO:0071559	response to transforming growth factor beta	-2.84713	-0.412281	1281,1284,2530	COL3A1,COL4A2,FUT8	3/172	TRUE	FALSE
3_Member	GO Biological Processes	GO:0007369	gastrulation	-2.81854	-0.393038	1284,3691,8091	COL4A2,ITGB4,HMGA2	3/176	TRUE	FALSE
3_Member	GO Biological Processes	GO:0007169	cell surface receptor protein tyrosine kinase signaling pathway	-2.56851	-0.199262	1282,1284,1464,8874	COL4A1,COL4A2,CSPG4,ARHGEF7	4/453	TRUE	FALSE
3_Member	KEGG Pathway	hsa04382	Cornified envelope formation	-2.56009	-0.194882	1282,1284,3691	COL4A1,COL4A2,ITGB4	3/217	TRUE	FALSE
3_Member	GO Cellular Components	GO:0005788	endoplasmic reticulum lumen	-2.09537	0	1281,1282,1284	COL3A1,COL4A1,COL4A2	3/319	TRUE	FALSE
3_Member	Reactome Gene Sets	R-HSA-5653656	Vesicle-mediated transport	-1.96458	0	1281,1282,1284,1777	COL3A1,COL4A1,COL4A2,DNASE2	4/674	TRUE	FALSE
3_Member	GO Biological Processes	GO:0071363	cellular response to growth factor stimulus	-1.55984	0	1281,1284,2530	COL3A1,COL4A2,FUT8	3/508	TRUE	FALSE
3_Member	GO Biological Processes	GO:0070848	response to growth factor	-1.49227	0	1281,1284,2530	COL3A1,COL4A2,FUT8	3/540	TRUE	FALSE
3_Member	GO Biological Processes	GO:0048598	embryonic morphogenesis	-1.35448	0	1284,3691,8091	COL4A2,ITGB4,HMGA2	3/613	TRUE	FALSE
3_Member	GO Cellular Components	GO:0030312	external encapsulating structure	-6.69661	-2.99695	1281,1282,1284,1464,3691,3897,5644,7059	COL3A1,COL4A1,COL4A2,CSPG4,ITGB4,L1CAM,PRSS1,THBS3	8/498	TRUE	TRUE
3_Summary	GO Cellular Components	GO:0031012	extracellular matrix	-6.70324	-2.99695	1281,1282,1284,1464,3691,3897,5644,7059,25802,7436,8874,55740,2530,4162,8091,1777	COL3A1,COL4A1,COL4A2,CSPG4,ITGB4,L1CAM,PRSS1,THBS3,LMOD1,VLDLR,ARHGEF7,ENAH,FUT8,MCAM,HMGA2,DNASE2	16/-	TRUE	TRUE
3_Member	GO Cellular Components	GO:0031012	extracellular matrix	-6.70324	-2.99695	1281,1282,1284,1464,3691,3897,5644,7059	COL3A1,COL4A1,COL4A2,CSPG4,ITGB4,L1CAM,PRSS1,THBS3	8/497	TRUE	TRUE
2_Summary	GO Biological Processes	GO:0051715	cytolysis in another organism	-6.78061	-2.99695	2633,2634,2635,1917,22875,55964,664618,1525,8091,7059,8987,10162,135154,2530	GBP1,GBP2,GBP3,EEF1A2,ENPP4,SEPTIN3,HSP90AB4P,CXADR,HMGA2,THBS3,STBD1,LPCAT3,SDHAF4,FUT8	14/-	TRUE	TRUE
4_Member	GO Biological Processes	GO:0031346	positive regulation of cell projection organization	-1.9306	0	3897,7436,8874	L1CAM,VLDLR,ARHGEF7	3/367	TRUE	FALSE
4_Member	GO Biological Processes	GO:0098609	cell-cell adhesion	-1.47013	0	1525,3691,3897	CXADR,ITGB4,L1CAM	3/551	TRUE	FALSE
4_Member	GO Cellular Components	GO:0044297	cell body	-1.46814	0	1525,3897,8874	CXADR,L1CAM,ARHGEF7	3/552	TRUE	FALSE
1_Summary	Reactome Gene Sets	R-HSA-9734767	Developmental Cell Lineages	-7.6507	-3.25206	1264,1281,1464,3691,5644,203111,3897,4162,8874,55740	CNN1,COL3A1,CSPG4,ITGB4,PRSS1,ERICH5,L1CAM,MCAM,ARHGEF7,ENAH	10/-	TRUE	TRUE
1_Member	Reactome Gene Sets	R-HSA-9734767	Developmental Cell Lineages	-7.6507	-3.25206	1264,1281,1464,3691,5644,203111	CNN1,COL3A1,CSPG4,ITGB4,PRSS1,ERICH5	6/137	TRUE	TRUE
5_Member	GO Biological Processes	GO:0030029	actin filament-based process	-3.87597	-1.11471	800,1264,1525,25802,55740,345651	CALD1,CNN1,CXADR,LMOD1,ENAH,ACTBL2	6/620	TRUE	FALSE
5_Member	GO Molecular Functions	GO:0003779	actin binding	-3.58956	-0.933177	800,1264,2633,25802,55740	CALD1,CNN1,GBP1,LMOD1,ENAH	5/445	TRUE	FALSE
5_Member	GO Biological Processes	GO:0007015	actin filament organization	-3.33275	-0.766621	800,1264,25802,55740	CALD1,CNN1,LMOD1,ENAH	4/281	TRUE	FALSE
5_Member	GO Cellular Components	GO:0015629	actin cytoskeleton	-3.18829	-0.666729	800,1264,2633,25802,345651	CALD1,CNN1,GBP1,LMOD1,ACTBL2	5/545	TRUE	FALSE
5_Member	GO Biological Processes	GO:0097435	supramolecular fiber organization	-3.13522	-0.639676	800,1264,1281,25802,55740	CALD1,CNN1,COL3A1,LMOD1,ENAH	5/560	TRUE	FALSE
6_Summary	Reactome Gene Sets	R-HSA-9820448	Developmental Cell Lineages of the Exocrine Pancreas	-3.75493	-1.04649	1281,5644,203111	COL3A1,PRSS1,ERICH5	3/-	TRUE	FALSE
6_Member	Reactome Gene Sets	R-HSA-9820448	Developmental Cell Lineages of the Exocrine Pancreas	-3.75493	-1.04649	1281,5644,203111	COL3A1,PRSS1,ERICH5	3/84	TRUE	FALSE
7_Summary	GO Biological Processes	GO:0042063	gliogenesis	-3.30395	-0.744164	1281,1464,3691,8091,1282,7059,10234,80279,2633	COL3A1,CSPG4,ITGB4,HMGA2,COL4A1,THBS3,LRRC17,CDK5RAP3,GBP1	9/-	TRUE	FALSE
7_Member	GO Biological Processes	GO:0042063	gliogenesis	-3.30395	-0.744164	1281,1464,3691,8091	COL3A1,CSPG4,ITGB4,HMGA2	4/286	TRUE	FALSE
7_Member	GO Molecular Functions	GO:0019838	growth factor binding	-3.14123	-0.640221	1281,1282,3691	COL3A1,COL4A1,ITGB4	3/136	TRUE	FALSE
7_Member	GO Biological Processes	GO:0051216	cartilage development	-2.79064	-0.378779	1281,7059,8091	COL3A1,THBS3,HMGA2	3/180	TRUE	FALSE
7_Member	GO Biological Processes	GO:0060348	bone development	-2.66653	-0.276492	1281,7059,10234	COL3A1,THBS3,LRRC17	3/199	TRUE	FALSE
7_Member	GO Biological Processes	GO:0061448	connective tissue development	-2.41206	-0.074123	1281,7059,8091	COL3A1,THBS3,HMGA2	3/245	TRUE	FALSE
7_Member	GO Biological Processes	GO:0001501	skeletal system development	-2.36678	-0.0436937	1281,7059,8091,10234	COL3A1,THBS3,HMGA2,LRRC17	4/516	TRUE	FALSE
7_Member	GO Biological Processes	GO:0048729	tissue morphogenesis	-2.11772	0	1281,1282,3691,8091	COL3A1,COL4A1,ITGB4,HMGA2	4/608	TRUE	FALSE
7_Member	GO Biological Processes	GO:0007420	brain development	-1.78597	0	1281,1282,8091,80279	COL3A1,COL4A1,HMGA2,CDK5RAP3	4/762	TRUE	FALSE
7_Member	GO Biological Processes	GO:0040007	growth	-1.65168	0	1281,7059,8091	COL3A1,THBS3,HMGA2	3/468	TRUE	FALSE
7_Member	GO Biological Processes	GO:0048589	developmental growth	-1.65168	0	1281,7059,8091	COL3A1,THBS3,HMGA2	3/468	TRUE	FALSE
7_Member	GO Biological Processes	GO:0002683	negative regulation of immune system process	-1.40303	0	1281,2633,10234	COL3A1,GBP1,LRRC17	3/586	TRUE	FALSE
8_Summary	GO Molecular Functions	GO:0004519	endonuclease activity	-3.11375	-0.62893	1777,8091,54913	DNASE2,HMGA2,RPP25	3/-	TRUE	FALSE
8_Member	GO Molecular Functions	GO:0004519	endonuclease activity	-3.11375	-0.62893	1777,8091,54913	DNASE2,HMGA2,RPP25	3/139	TRUE	FALSE
8_Member	GO Molecular Functions	GO:0004518	nuclease activity	-2.54885	-0.187889	1777,8091,54913	DNASE2,HMGA2,RPP25	3/219	TRUE	FALSE
9_Summary	Reactome Gene Sets	R-HSA-8980692	RHOA GTPase cycle	-3.05198	-0.577629	4162,8874,8987	MCAM,ARHGEF7,STBD1	3/-	TRUE	FALSE
9_Member	Reactome Gene Sets	R-HSA-8980692	RHOA GTPase cycle	-3.05198	-0.577629	4162,8874,8987	MCAM,ARHGEF7,STBD1	3/146	TRUE	FALSE
9_Member	Reactome Gene Sets	R-HSA-9012999	RHO GTPase cycle	-1.70871	0	4162,8874,8987	MCAM,ARHGEF7,STBD1	3/445	TRUE	FALSE
10_Summary	GO Molecular Functions	GO:0005178	integrin binding	-3.00147	-0.532257	1281,1525,3691,800,4162,22875,25802	COL3A1,CXADR,ITGB4,CALD1,MCAM,ENPP4,LMOD1	7/-	TRUE	FALSE
10_Member	GO Molecular Functions	GO:0005178	integrin binding	-3.00147	-0.532257	1281,1525,3691	COL3A1,CXADR,ITGB4	3/152	TRUE	FALSE
10_Member	GO Molecular Functions	GO:0050839	cell adhesion molecule binding	-2.88888	-0.444484	800,1281,1525,3691,4162	CALD1,COL3A1,CXADR,ITGB4,MCAM	5/636	TRUE	FALSE
10_Member	GO Biological Processes	GO:0009611	response to wounding	-2.5412	-0.187889	1281,3691,4162,22875	COL3A1,ITGB4,MCAM,ENPP4	4/461	TRUE	FALSE
10_Member	GO Biological Processes	GO:0042060	wound healing	-2.01665	0	1281,4162,22875	COL3A1,MCAM,ENPP4	3/341	TRUE	FALSE
10_Member	GO Biological Processes	GO:0061061	muscle structure development	-1.48821	0	1281,1525,25802	COL3A1,CXADR,LMOD1	3/542	TRUE	FALSE
11_Summary	GO Biological Processes	GO:0050808	synapse organization	-2.88387	-0.444281	1282,3897,55740,345651,7436	COL4A1,L1CAM,ENAH,ACTBL2,VLDLR	5/-	TRUE	FALSE
11_Member	GO Biological Processes	GO:0050808	synapse organization	-2.88387	-0.444281	1282,3897,55740,345651	COL4A1,L1CAM,ENAH,ACTBL2	4/371	TRUE	FALSE
11_Member	GO Biological Processes	GO:0048667	cell morphogenesis involved in neuron differentiation	-2.52774	-0.178326	3897,7436,55740,345651	L1CAM,VLDLR,ENAH,ACTBL2	4/465	TRUE	FALSE
11_Member	GO Biological Processes	GO:0048812	neuron projection morphogenesis	-2.38476	-0.0505856	3897,7436,55740,345651	L1CAM,VLDLR,ENAH,ACTBL2	4/510	TRUE	FALSE
11_Member	GO Biological Processes	GO:0120039	plasma membrane bounded cell projection morphogenesis	-2.36976	-0.0436937	3897,7436,55740,345651	L1CAM,VLDLR,ENAH,ACTBL2	4/515	TRUE	FALSE
11_Member	GO Biological Processes	GO:0048858	cell projection morphogenesis	-2.34904	-0.0331873	3897,7436,55740,345651	L1CAM,VLDLR,ENAH,ACTBL2	4/522	TRUE	FALSE
11_Member	GO Biological Processes	GO:0007409	axonogenesis	-1.88098	0	3897,55740,345651	L1CAM,ENAH,ACTBL2	3/383	TRUE	FALSE
11_Member	GO Biological Processes	GO:0000902	cell morphogenesis	-1.84197	0	3897,7436,55740,345651	L1CAM,VLDLR,ENAH,ACTBL2	4/733	TRUE	FALSE
11_Member	GO Biological Processes	GO:0031175	neuron projection development	-1.84197	0	3897,7436,55740,345651	L1CAM,VLDLR,ENAH,ACTBL2	4/733	TRUE	FALSE
11_Member	GO Biological Processes	GO:0061564	axon development	-1.71897	0	3897,55740,345651	L1CAM,ENAH,ACTBL2	3/441	TRUE	FALSE
12_Summary	GO Molecular Functions	GO:0019904	protein domain specific binding	-2.84127	-0.411115	1525,2530,3897,8091,55740,2634,10162	CXADR,FUT8,L1CAM,HMGA2,ENAH,GBP2,LPCAT3	7/-	TRUE	FALSE
12_Member	GO Molecular Functions	GO:0019904	protein domain specific binding	-2.84127	-0.411115	1525,2530,3897,8091,55740	CXADR,FUT8,L1CAM,HMGA2,ENAH	5/652	TRUE	FALSE
12_Member	GO Biological Processes	GO:0016032	viral process	-2.27251	0	1525,2530,2634	CXADR,FUT8,GBP2	3/275	TRUE	FALSE
12_Member	GO Biological Processes	GO:0080135	regulation of cellular response to stress	-1.46814	0	2530,8091,10162	FUT8,HMGA2,LPCAT3	3/552	TRUE	FALSE
13_Summary	GO Biological Processes	GO:0048871	multicellular organismal-level homeostasis	-2.76949	-0.362078	1281,1525,1777,10162,80279,5644	COL3A1,CXADR,DNASE2,LPCAT3,CDK5RAP3,PRSS1	6/-	TRUE	FALSE
13_Member	GO Biological Processes	GO:0048871	multicellular organismal-level homeostasis	-2.76949	-0.362078	1281,1525,1777,10162,80279	COL3A1,CXADR,DNASE2,LPCAT3,CDK5RAP3	5/677	TRUE	FALSE
13_Member	GO Biological Processes	GO:0022411	cellular component disassembly	-2.10282	0	1777,5644,80279	DNASE2,PRSS1,CDK5RAP3	3/317	TRUE	FALSE
13_Member	GO Biological Processes	GO:0048872	homeostasis of number of cells	-2.08429	0	1777,10162,80279	DNASE2,LPCAT3,CDK5RAP3	3/322	TRUE	FALSE
14_Summary	GO Molecular Functions	GO:0019901	protein kinase binding	-2.71422	-0.315584	1464,1917,8874,80279,345651,8091,1777,7436	CSPG4,EEF1A2,ARHGEF7,CDK5RAP3,ACTBL2,HMGA2,DNASE2,VLDLR	8/-	TRUE	FALSE
14_Member	GO Molecular Functions	GO:0019901	protein kinase binding	-2.71422	-0.315584	1464,1917,8874,80279,345651	CSPG4,EEF1A2,ARHGEF7,CDK5RAP3,ACTBL2	5/697	TRUE	FALSE
14_Member	GO Biological Processes	GO:0042325	regulation of phosphorylation	-2.64649	-0.260695	1464,1917,8091,80279	CSPG4,EEF1A2,HMGA2,CDK5RAP3	4/431	TRUE	FALSE
14_Member	GO Molecular Functions	GO:0019900	kinase binding	-2.51257	-0.167017	1464,1917,8874,80279,345651	CSPG4,EEF1A2,ARHGEF7,CDK5RAP3,ACTBL2	5/776	TRUE	FALSE
14_Member	GO Biological Processes	GO:0042327	positive regulation of phosphorylation	-2.36833	-0.0436937	1464,1917,8091	CSPG4,EEF1A2,HMGA2	3/254	TRUE	FALSE
14_Member	GO Biological Processes	GO:0043549	regulation of kinase activity	-2.35884	-0.0393854	1917,8091,80279	EEF1A2,HMGA2,CDK5RAP3	3/256	TRUE	FALSE
14_Member	GO Biological Processes	GO:0050790	regulation of catalytic activity	-2.22831	0	1917,8091,8874,80279	EEF1A2,HMGA2,ARHGEF7,CDK5RAP3	4/565	TRUE	FALSE
14_Member	GO Biological Processes	GO:0019220	regulation of phosphate metabolic process	-2.17313	0	1464,1917,8091,80279	CSPG4,EEF1A2,HMGA2,CDK5RAP3	4/586	TRUE	FALSE
14_Member	GO Biological Processes	GO:0051174	regulation of phosphorus metabolic process	-2.17056	0	1464,1917,8091,80279	CSPG4,EEF1A2,HMGA2,CDK5RAP3	4/587	TRUE	FALSE
14_Member	GO Biological Processes	GO:0051338	regulation of transferase activity	-2.15257	0	1917,8091,80279	EEF1A2,HMGA2,CDK5RAP3	3/304	TRUE	FALSE
14_Member	GO Biological Processes	GO:0043085	positive regulation of catalytic activity	-2.09909	0	1917,8091,8874	EEF1A2,HMGA2,ARHGEF7	3/318	TRUE	FALSE
14_Member	GO Biological Processes	GO:0010562	positive regulation of phosphorus metabolic process	-2.09166	0	1464,1917,8091	CSPG4,EEF1A2,HMGA2	3/320	TRUE	FALSE
14_Member	GO Biological Processes	GO:0045937	positive regulation of phosphate metabolic process	-2.09166	0	1464,1917,8091	CSPG4,EEF1A2,HMGA2	3/320	TRUE	FALSE
14_Member	GO Biological Processes	GO:0031401	positive regulation of protein modification process	-1.90549	0	1464,8091,80279	CSPG4,HMGA2,CDK5RAP3	3/375	TRUE	FALSE
14_Member	GO Biological Processes	GO:0001932	regulation of protein phosphorylation	-1.86894	0	1464,8091,80279	CSPG4,HMGA2,CDK5RAP3	3/387	TRUE	FALSE
14_Member	GO Cellular Components	GO:0000323	lytic vacuole	-1.72888	0	1464,1777,1917,7436	CSPG4,DNASE2,EEF1A2,VLDLR	4/793	TRUE	FALSE
14_Member	GO Cellular Components	GO:0005764	lysosome	-1.72888	0	1464,1777,1917,7436	CSPG4,DNASE2,EEF1A2,VLDLR	4/793	TRUE	FALSE
14_Member	GO Biological Processes	GO:0044093	positive regulation of molecular function	-1.55548	0	1917,8091,8874	EEF1A2,HMGA2,ARHGEF7	3/510	TRUE	FALSE
15_Summary	GO Biological Processes	GO:0015980	energy derivation by oxidation of organic compounds	-2.10657	0	50,8987,135154	ACO2,STBD1,SDHAF4	3/-	TRUE	FALSE
15_Member	GO Biological Processes	GO:0015980	energy derivation by oxidation of organic compounds	-2.10657	0	50,8987,135154	ACO2,STBD1,SDHAF4	3/316	TRUE	FALSE
15_Member	GO Biological Processes	GO:0006091	generation of precursor metabolites and energy	-1.89316	0	50,8987,135154	ACO2,STBD1,SDHAF4	3/379	TRUE	FALSE
16_Summary	GO Cellular Components	GO:0005938	cell cortex	-2.07696	0	800,8874,55964	CALD1,ARHGEF7,SEPTIN3	3/-	TRUE	FALSE
16_Member	GO Cellular Components	GO:0005938	cell cortex	-2.07696	0	800,8874,55964	CALD1,ARHGEF7,SEPTIN3	3/324	TRUE	FALSE
17_Summary	GO Biological Processes	GO:0043254	regulation of protein-containing complex assembly	-1.72674	0	2634,8874,25802	GBP2,ARHGEF7,LMOD1	3/-	TRUE	FALSE
17_Member	GO Biological Processes	GO:0043254	regulation of protein-containing complex assembly	-1.72674	0	2634,8874,25802	GBP2,ARHGEF7,LMOD1	3/438	TRUE	FALSE
18_Summary	GO Biological Processes	GO:0043065	positive regulation of apoptotic process	-1.43884	0	1917,8874,10687	EEF1A2,ARHGEF7,PNMA2	3/-	TRUE	FALSE
18_Member	GO Biological Processes	GO:0043065	positive regulation of apoptotic process	-1.43884	0	1917,8874,10687	EEF1A2,ARHGEF7,PNMA2	3/567	TRUE	FALSE
18_Member	GO Biological Processes	GO:0043068	positive regulation of programmed cell death	-1.40303	0	1917,8874,10687	EEF1A2,ARHGEF7,PNMA2	3/586	TRUE	FALSE
19_Summary	GO Biological Processes	GO:0044057	regulation of system process	-1.38655	0	1264,1525,10162	CNN1,CXADR,LPCAT3	3/-	TRUE	FALSE
19_Member	GO Biological Processes	GO:0044057	regulation of system process	-1.38655	0	1264,1525,10162	CNN1,CXADR,LPCAT3	3/595	TRUE	FALSE

## Sheet: Downregulated
GroupID	Category	Term	Description	LogP	Log(q-value)	Genes	Symbols	InTerm_InList	≥ 3 Unambiguously mapped proteins	Q-value < 0.05
1_Summary	GO Molecular Functions	GO:0005131	growth hormone receptor binding	-7.3982	-2.99956	1442,1444,2688,1293	CSH1,CSHL1,GH1,COL6A3	4/-	FALSE	TRUE
1_Member	GO Molecular Functions	GO:0005131	growth hormone receptor binding	-7.3982	-2.99956	1442,1444,2688	CSH1,CSHL1,GH1	3/10	FALSE	TRUE
1_Member	GO Biological Processes	GO:0060396	growth hormone receptor signaling pathway	-6.17403	-2.19721	1442,1444,2688	CSH1,CSHL1,GH1	3/24	FALSE	TRUE
1_Member	GO Biological Processes	GO:0071378	cellular response to growth hormone stimulus	-6.11872	-2.19721	1442,1444,2688	CSH1,CSHL1,GH1	3/25	FALSE	TRUE
1_Member	GO Molecular Functions	GO:0051427	hormone receptor binding	-5.66659	-1.87001	1442,1444,2688	CSH1,CSHL1,GH1	3/35	FALSE	TRUE
1_Member	GO Biological Processes	GO:0060416	response to growth hormone	-5.55697	-1.85731	1442,1444,2688	CSH1,CSHL1,GH1	3/38	FALSE	TRUE
1_Member	GO Biological Processes	GO:0046427	positive regulation of receptor signaling pathway via JAK-STAT	-5.39278	-1.7723	1442,1444,2688	CSH1,CSHL1,GH1	3/43	FALSE	TRUE
1_Member	GO Biological Processes	GO:1904894	positive regulation of receptor signaling pathway via STAT	-5.19331	-1.63977	1442,1444,2688	CSH1,CSHL1,GH1	3/50	FALSE	TRUE
1_Member	GO Biological Processes	GO:0046425	regulation of receptor signaling pathway via JAK-STAT	-4.64393	-1.14839	1442,1444,2688	CSH1,CSHL1,GH1	3/76	FALSE	FALSE
1_Member	GO Biological Processes	GO:1904892	regulation of receptor signaling pathway via STAT	-4.34001	-0.895617	1442,1444,2688	CSH1,CSHL1,GH1	3/96	FALSE	FALSE
1_Member	KEGG Pathway	hsa04935	Growth hormone synthesis, secretion and action	-4.03012	-0.631491	1442,1444,2688	CSH1,CSHL1,GH1	3/122	FALSE	FALSE
1_Member	GO Molecular Functions	GO:0005179	hormone activity	-3.91901	-0.585012	1442,1444,2688	CSH1,CSHL1,GH1	3/133	FALSE	FALSE
1_Member	KEGG Pathway	hsa04151	PI3K-Akt signaling pathway	-3.90446	-0.585012	1293,1442,1444,2688	COL6A3,CSH1,CSHL1,GH1	4/362	FALSE	FALSE
1_Member	GO Molecular Functions	GO:0008083	growth factor activity	-3.66617	-0.381483	1442,1444,2688	CSH1,CSHL1,GH1	3/162	FALSE	FALSE
1_Member	KEGG Pathway	hsa04630	JAK-STAT signaling pathway	-3.61973	-0.367222	1442,1444,2688	CSH1,CSHL1,GH1	3/168	FALSE	FALSE
1_Member	KEGG Pathway	hsa04081	Hormone signaling	-3.28293	-0.0603889	1442,1444,2688	CSH1,CSHL1,GH1	3/219	FALSE	FALSE
1_Member	GO Molecular Functions	GO:0005126	cytokine receptor binding	-2.98292	0	1442,1444,2688	CSH1,CSHL1,GH1	3/278	FALSE	FALSE
1_Member	GO Biological Processes	GO:0071375	cellular response to peptide hormone stimulus	-2.97396	0	1442,1444,2688	CSH1,CSHL1,GH1	3/280	FALSE	FALSE
1_Member	KEGG Pathway	hsa04060	Cytokine-cytokine receptor interaction	-2.89618	0	1442,1444,2688	CSH1,CSHL1,GH1	3/298	FALSE	FALSE
1_Member	KEGG Pathway	hsa04080	Neuroactive ligand-receptor interaction	-2.62808	0	1442,1444,2688	CSH1,CSHL1,GH1	3/370	FALSE	FALSE
1_Member	GO Biological Processes	GO:0043434	response to peptide hormone	-2.52322	0	1442,1444,2688	CSH1,CSHL1,GH1	3/403	FALSE	FALSE
1_Member	GO Biological Processes	GO:0007169	cell surface receptor protein tyrosine kinase signaling pathway	-2.38069	0	1442,1444,2688	CSH1,CSHL1,GH1	3/453	FALSE	FALSE
1_Member	GO Biological Processes	GO:0031667	response to nutrient levels	-2.17575	0	1442,1444,2688	CSH1,CSHL1,GH1	3/537	FALSE	FALSE
1_Member	GO Molecular Functions	GO:0048018	receptor ligand activity	-2.14285	0	1442,1444,2688	CSH1,CSHL1,GH1	3/552	FALSE	FALSE
1_Member	GO Molecular Functions	GO:0030546	signaling receptor activator activity	-2.12146	0	1442,1444,2688	CSH1,CSHL1,GH1	3/562	FALSE	FALSE
1_Member	GO Biological Processes	GO:0032870	cellular response to hormone stimulus	-2.12146	0	1442,1444,2688	CSH1,CSHL1,GH1	3/562	FALSE	FALSE
1_Member	GO Molecular Functions	GO:0030545	signaling receptor regulator activity	-2.01657	0	1442,1444,2688	CSH1,CSHL1,GH1	3/614	FALSE	FALSE
1_Member	GO Biological Processes	GO:1901699	cellular response to nitrogen compound	-1.99188	0	1442,1444,2688	CSH1,CSHL1,GH1	3/627	FALSE	FALSE
1_Member	GO Biological Processes	GO:0007167	enzyme-linked receptor protein signaling pathway	-1.90368	0	1442,1444,2688	CSH1,CSHL1,GH1	3/676	FALSE	FALSE
2_Summary	GO Biological Processes	GO:0010498	proteasomal protein catabolic process	-2.23523	0	2688,11060,57333	GH1,WWP2,RCN3	3/-	TRUE	FALSE
2_Member	GO Biological Processes	GO:0010498	proteasomal protein catabolic process	-2.23523	0	2688,11060,57333	GH1,WWP2,RCN3	3/511	TRUE	FALSE
2_Member	GO Biological Processes	GO:0051603	proteolysis involved in protein catabolic process	-1.80809	0	2688,11060,57333	GH1,WWP2,RCN3	3/734	TRUE	FALSE
3_Summary	GO Biological Processes	GO:0006886	intracellular protein transport	-2.08603	0	8498,23162,26286	RANBP3,MAPK8IP3,ARFGAP3	3/-	TRUE	FALSE
3_Member	GO Biological Processes	GO:0006886	intracellular protein transport	-2.08603	0	8498,23162,26286	RANBP3,MAPK8IP3,ARFGAP3	3/579	TRUE	FALSE
4_Summary	GO Molecular Functions	GO:0003682	chromatin binding	-1.99564	0	3006,8208,29089	H1-2,CHAF1B,UBE2T	3/-	TRUE	FALSE
4_Member	GO Molecular Functions	GO:0003682	chromatin binding	-1.99564	0	3006,8208,29089	H1-2,CHAF1B,UBE2T	3/625	TRUE	FALSE
