# Supplementary material for: A severe neurodevelopmental syndrome linked to a South Asian founder variant in the UFMylation adaptor CDK5RAP3
Source: Acta Neuropathol. 2026 Apr 27;151(1):48. doi: 10.1007/s00401-026-03017-2 (PMC13121207; doi:10.1007/s00401-026-03017-2)
Supplement: Supplementary file 7 — Supplementary file7 (XLSX 93 KB) [file 401_2026_3017_MOESM7_ESM.xlsx]

## Sheet: Upregulated
GroupID	Category	Term	Description	LogP	Log(q-value)	Genes	Symbols	InTerm_InList	≥ 3 Unambiguously mapped proteins	Q-value < 0.05
1_Summary	GO Cellular Components	GO:0030055	cell-substrate junction	-23.7472	-19.3486	1072,1601,1756,2017,2037,2317,2319,3685,3691,3728,3897,4035,4082,4162,6205,6548,6840,7414,9019,9590,10487,22800,23022,55616,55740,55901,57669,83481,91179,91624,171024	CFL1,DAB2,DMD,CTTN,EPB41L2,FLNB,FLOT2,ITGAV,ITGB4,JUP,L1CAM,LRP1,MARCKS,MCAM,RPS11,SLC9A1,SVIL,VCL,MPZL1,AKAP12,CAP1,RRAS2,PALLD,ASAP3,ENAH,THSD1,EPB41L5,EPPK1,SCARF2,NEXN,SYNPO2	31/-	TRUE	TRUE
1_Member	GO Cellular Components	GO:0030055	cell-substrate junction	-23.7472	-19.3486	1072,1601,1756,2017,2037,2317,2319,3685,3691,3728,3897,4035,4082,4162,6205,6548,6840,7414,9019,9590,10487,22800,23022,55616,55740,55901,57669,83481,91179,91624,171024	CFL1,DAB2,DMD,CTTN,EPB41L2,FLNB,FLOT2,ITGAV,ITGB4,JUP,L1CAM,LRP1,MARCKS,MCAM,RPS11,SLC9A1,SVIL,VCL,MPZL1,AKAP12,CAP1,RRAS2,PALLD,ASAP3,ENAH,THSD1,EPB41L5,EPPK1,SCARF2,NEXN,SYNPO2	31/433	TRUE	TRUE
1_Member	GO Cellular Components	GO:0005925	focal adhesion	-21.6762	-17.5786	1072,1601,2017,2037,2317,2319,3685,3691,3728,3897,4035,4082,4162,6205,6548,6840,7414,9019,9590,10487,22800,23022,55616,55740,55901,57669,91179,91624,171024	CFL1,DAB2,CTTN,EPB41L2,FLNB,FLOT2,ITGAV,ITGB4,JUP,L1CAM,LRP1,MARCKS,MCAM,RPS11,SLC9A1,SVIL,VCL,MPZL1,AKAP12,CAP1,RRAS2,PALLD,ASAP3,ENAH,THSD1,EPB41L5,SCARF2,NEXN,SYNPO2	29/423	TRUE	TRUE
2_Summary	GO Molecular Functions	GO:0003779	actin binding	-17.7103	-13.7888	800,1072,1756,2037,2317,4082,4130,4131,4638,6840,7168,7414,10487,23022,23136,23499,25802,26064,55740,57553,65108,65979,85462,91624,170954,171024,2017,2319,8476,23580,29126,63895,80005,92922,287,5318,6548,11188,55785,57669,6249,7461,57606,83481	CALD1,CFL1,DMD,EPB41L2,FLNB,MARCKS,MAP1A,MAP1B,MYLK,SVIL,TPM1,VCL,CAP1,PALLD,EPB41L3,MACF1,LMOD1,RAI14,ENAH,MICAL3,MARCKSL1,PHACTR4,FHDC1,NEXN,PPP1R18,SYNPO2,CTTN,FLOT2,CDC42BPA,CDC42EP4,CD274,PIEZO2,DOCK5,CCDC102A,ANK2,PKP2,SLC9A1,NISCH,FGD6,EPB41L5,CLIP1,CLIP2,SLAIN2,EPPK1	44/-	TRUE	TRUE
2_Member	GO Molecular Functions	GO:0003779	actin binding	-17.7103	-13.7888	800,1072,1756,2037,2317,4082,4130,4131,4638,6840,7168,7414,10487,23022,23136,23499,25802,26064,55740,57553,65108,65979,85462,91624,170954,171024	CALD1,CFL1,DMD,EPB41L2,FLNB,MARCKS,MAP1A,MAP1B,MYLK,SVIL,TPM1,VCL,CAP1,PALLD,EPB41L3,MACF1,LMOD1,RAI14,ENAH,MICAL3,MARCKSL1,PHACTR4,FHDC1,NEXN,PPP1R18,SYNPO2	26/445	TRUE	TRUE
2_Member	GO Cellular Components	GO:0015629	actin cytoskeleton	-15.5758	-11.9554	800,1072,1756,2017,2037,2317,2319,4082,4638,6840,7168,7414,8476,10487,23022,23499,23580,25802,26064,29126,63895,80005,85462,91624,92922,171024	CALD1,CFL1,DMD,CTTN,EPB41L2,FLNB,FLOT2,MARCKS,MYLK,SVIL,TPM1,VCL,CDC42BPA,CAP1,PALLD,MACF1,CDC42EP4,LMOD1,RAI14,CD274,PIEZO2,DOCK5,FHDC1,NEXN,CCDC102A,SYNPO2	26/545	TRUE	TRUE
2_Member	GO Biological Processes	GO:0030029	actin filament-based process	-12.4198	-8.92426	287,800,1072,2017,2037,2317,4082,5318,6548,6840,7168,8476,10487,11188,23022,23136,25802,55740,55785,57553,57669,65108,65979,85462	ANK2,CALD1,CFL1,CTTN,EPB41L2,FLNB,MARCKS,PKP2,SLC9A1,SVIL,TPM1,CDC42BPA,CAP1,NISCH,PALLD,EPB41L3,LMOD1,ENAH,FGD6,MICAL3,EPB41L5,MARCKSL1,PHACTR4,FHDC1	24/620	TRUE	TRUE
2_Member	GO Biological Processes	GO:0030036	actin cytoskeleton organization	-10.8523	-7.53284	800,1072,2017,2037,2317,4082,6840,7168,8476,10487,11188,23022,23136,25802,55740,55785,57553,57669,65108,65979,85462	CALD1,CFL1,CTTN,EPB41L2,FLNB,MARCKS,SVIL,TPM1,CDC42BPA,CAP1,NISCH,PALLD,EPB41L3,LMOD1,ENAH,FGD6,MICAL3,EPB41L5,MARCKSL1,PHACTR4,FHDC1	21/546	TRUE	TRUE
2_Member	GO Biological Processes	GO:0097435	supramolecular fiber organization	-6.59103	-3.97055	800,1072,4082,5318,6249,6840,7168,7461,10487,25802,55740,57553,57606,65108,83481,85462	CALD1,CFL1,MARCKS,PKP2,CLIP1,SVIL,TPM1,CLIP2,CAP1,LMOD1,ENAH,MICAL3,SLAIN2,MARCKSL1,EPPK1,FHDC1	16/560	TRUE	TRUE
2_Member	GO Biological Processes	GO:0007015	actin filament organization	-5.98981	-3.48327	800,1072,4082,6840,7168,10487,25802,55740,57553,65108,85462	CALD1,CFL1,MARCKS,SVIL,TPM1,CAP1,LMOD1,ENAH,MICAL3,MARCKSL1,FHDC1	11/281	TRUE	TRUE
2_Member	GO Biological Processes	GO:0008154	actin polymerization or depolymerization	-4.54	-2.32589	1072,6840,55740,57553,85462	CFL1,SVIL,ENAH,MICAL3,FHDC1	5/60	TRUE	TRUE
2_Member	GO Molecular Functions	GO:0051015	actin filament binding	-4.44649	-2.27057	1072,2317,4082,6840,7168,23499,65108,91624	CFL1,FLNB,MARCKS,SVIL,TPM1,MACF1,MARCKSL1,NEXN	8/208	TRUE	TRUE
3_Summary	GO Molecular Functions	GO:0050839	cell adhesion molecule binding	-15.875	-12.147	288,800,831,1004,1009,1500,1829,2017,2317,3685,3691,3728,3875,4067,4162,4897,5318,7414,11188,23022,23499,26130,51400,56829,85377,85456,91624,140885,287,1072,2319,3856,6548,8476,23037,23136,23580,57669,65266,83481,92140	ANK3,CALD1,CAST,CDH6,CDH11,CTNND1,DSG2,CTTN,FLNB,ITGAV,ITGB4,JUP,KRT18,LYN,MCAM,NRCAM,PKP2,VCL,NISCH,PALLD,MACF1,GAPVD1,PPME1,ZC3HAV1,MICALL1,TNKS1BP1,NEXN,SIRPA,ANK2,CFL1,FLOT2,KRT8,SLC9A1,CDC42BPA,PDZD2,EPB41L3,CDC42EP4,EPB41L5,WNK4,EPPK1,MTDH	41/-	TRUE	TRUE
3_Member	GO Molecular Functions	GO:0050839	cell adhesion molecule binding	-15.875	-12.147	288,800,831,1004,1009,1500,1829,2017,2317,3685,3691,3728,3875,4067,4162,4897,5318,7414,11188,23022,23499,26130,51400,56829,85377,85456,91624,140885	ANK3,CALD1,CAST,CDH6,CDH11,CTNND1,DSG2,CTTN,FLNB,ITGAV,ITGB4,JUP,KRT18,LYN,MCAM,NRCAM,PKP2,VCL,NISCH,PALLD,MACF1,GAPVD1,PPME1,ZC3HAV1,MICALL1,TNKS1BP1,NEXN,SIRPA	28/636	TRUE	TRUE
3_Member	GO Cellular Components	GO:0005911	cell-cell junction	-15.8467	-12.147	287,288,1004,1009,1072,1500,1829,2319,3728,3856,3875,4067,5318,6548,7414,8476,23037,23136,23580,57669,65266,83481,85377,85456,91624,92140	ANK2,ANK3,CDH6,CDH11,CFL1,CTNND1,DSG2,FLOT2,JUP,KRT8,KRT18,LYN,PKP2,SLC9A1,VCL,CDC42BPA,PDZD2,EPB41L3,CDC42EP4,EPB41L5,WNK4,EPPK1,MICALL1,TNKS1BP1,NEXN,MTDH	26/531	TRUE	TRUE
3_Member	GO Molecular Functions	GO:0045296	cadherin binding	-11.758	-8.3136	288,800,831,1004,1009,1500,2017,2317,3728,3875,5318,7414,23499,26130,51400,56829,85377,85456	ANK3,CALD1,CAST,CDH6,CDH11,CTNND1,CTTN,FLNB,JUP,KRT18,PKP2,VCL,MACF1,GAPVD1,PPME1,ZC3HAV1,MICALL1,TNKS1BP1	18/334	TRUE	TRUE
3_Member	GO Cellular Components	GO:0005912	adherens junction	-10.8129	-7.52823	1004,1009,1500,2319,3728,3875,4067,5318,7414,23580,57669,85377,85456,91624	CDH6,CDH11,CTNND1,FLOT2,JUP,KRT18,LYN,PKP2,VCL,CDC42EP4,EPB41L5,MICALL1,TNKS1BP1,NEXN	14/198	TRUE	TRUE
4_Summary	GO Cellular Components	GO:0031252	cell leading edge	-12.6678	-9.11431	1072,2017,2064,2319,3685,3691,4638,6249,6548,6792,7168,8476,23022,23136,23499,55616,55740,55785,57468,57669,65979,1756,85377,150696,4067,4131,4162,7414,83481,6091,19,394,2048	CFL1,CTTN,ERBB2,FLOT2,ITGAV,ITGB4,MYLK,CLIP1,SLC9A1,CDKL5,TPM1,CDC42BPA,PALLD,EPB41L3,MACF1,ASAP3,ENAH,FGD6,SLC12A5,EPB41L5,PHACTR4,DMD,MICALL1,PROM2,LYN,MAP1B,MCAM,VCL,EPPK1,ROBO1,ABCA1,ARHGAP5,EPHB2	33/-	TRUE	TRUE
4_Member	GO Cellular Components	GO:0031252	cell leading edge	-12.6678	-9.11431	1072,2017,2064,2319,3685,3691,4638,6249,6548,6792,7168,8476,23022,23136,23499,55616,55740,55785,57468,57669,65979	CFL1,CTTN,ERBB2,FLOT2,ITGAV,ITGB4,MYLK,CLIP1,SLC9A1,CDKL5,TPM1,CDC42BPA,PALLD,EPB41L3,MACF1,ASAP3,ENAH,FGD6,SLC12A5,EPB41L5,PHACTR4	21/438	TRUE	TRUE
4_Member	GO Cellular Components	GO:0001726	ruffle	-8.80576	-5.86952	1072,2017,2064,3685,6249,6792,7168,23022,23499,55616,55785,57669	CFL1,CTTN,ERBB2,ITGAV,CLIP1,CDKL5,TPM1,PALLD,MACF1,ASAP3,FGD6,EPB41L5	12/189	TRUE	TRUE
4_Member	GO Cellular Components	GO:0031256	leading edge membrane	-5.76563	-3.29725	1072,2064,3685,6792,7168,23136,23499,57468,57669	CFL1,ERBB2,ITGAV,CDKL5,TPM1,EPB41L3,MACF1,SLC12A5,EPB41L5	9/185	TRUE	TRUE
4_Member	GO Cellular Components	GO:0031253	cell projection membrane	-5.74026	-3.29102	1072,1756,2064,3685,6792,7168,23136,23499,57468,57669,85377,150696	CFL1,DMD,ERBB2,ITGAV,CDKL5,TPM1,EPB41L3,MACF1,SLC12A5,EPB41L5,MICALL1,PROM2	12/361	TRUE	TRUE
4_Member	GO Cellular Components	GO:0032587	ruffle membrane	-5.64194	-3.22558	1072,2064,3685,6792,7168,23499,57669	CFL1,ERBB2,ITGAV,CDKL5,TPM1,MACF1,EPB41L5	7/100	TRUE	TRUE
4_Member	GO Biological Processes	GO:0009611	response to wounding	-3.34691	-1.41809	2064,3685,3691,4067,4131,4162,7168,7414,23499,83481	ERBB2,ITGAV,ITGB4,LYN,MAP1B,MCAM,TPM1,VCL,MACF1,EPPK1	10/461	TRUE	TRUE
4_Member	GO Biological Processes	GO:0051057	positive regulation of small GTPase mediated signal transduction	-3.0047	-1.14514	2064,3685,6091,6792	ERBB2,ITGAV,ROBO1,CDKL5	4/74	TRUE	FALSE
4_Member	GO Biological Processes	GO:0051056	regulation of small GTPase mediated signal transduction	-2.55776	-0.791588	19,394,2048,2064,3685,6091,6792	ABCA1,ARHGAP5,EPHB2,ERBB2,ITGAV,ROBO1,CDKL5	7/314	TRUE	FALSE
4_Member	GO Biological Processes	GO:0042060	wound healing	-2.36198	-0.637923	2064,3685,4162,7168,7414,23499,83481	ERBB2,ITGAV,MCAM,TPM1,VCL,MACF1,EPPK1	7/341	TRUE	FALSE
5_Summary	GO Biological Processes	GO:0034330	cell junction organization	-11.3385	-7.93983	287,288,831,1004,1009,1072,1282,1829,2017,2048,2064,3691,3728,3897,4131,4897,5318,7414,10487,23136,55740,55901,2319,4067,6792,10424,25921,57460,57468,158471,1759,3685,4155,6091,6205,1756,23673	ANK2,ANK3,CAST,CDH6,CDH11,CFL1,COL4A1,DSG2,CTTN,EPHB2,ERBB2,ITGB4,JUP,L1CAM,MAP1B,NRCAM,PKP2,VCL,CAP1,EPB41L3,ENAH,THSD1,FLOT2,LYN,CDKL5,PGRMC2,ZDHHC5,PPM1H,SLC12A5,PRUNE2,DNM1,ITGAV,MBP,ROBO1,RPS11,DMD,STX12	37/-	TRUE	TRUE
5_Member	GO Biological Processes	GO:0034330	cell junction organization	-11.3385	-7.93983	287,288,831,1004,1009,1072,1282,1829,2017,2048,2064,3691,3728,3897,4131,4897,5318,7414,10487,23136,55740,55901	ANK2,ANK3,CAST,CDH6,CDH11,CFL1,COL4A1,DSG2,CTTN,EPHB2,ERBB2,ITGB4,JUP,L1CAM,MAP1B,NRCAM,PKP2,VCL,CAP1,EPB41L3,ENAH,THSD1	22/573	TRUE	TRUE
5_Member	GO Cellular Components	GO:0098978	glutamatergic synapse	-7.07783	-4.3952	1004,1009,1072,2017,2048,2319,4067,4131,4897,6792,10424,10487,23136,25921,57460,57468,158471	CDH6,CDH11,CFL1,CTTN,EPHB2,FLOT2,LYN,MAP1B,NRCAM,CDKL5,PGRMC2,CAP1,EPB41L3,ZDHHC5,PPM1H,SLC12A5,PRUNE2	17/585	TRUE	TRUE
5_Member	Reactome Gene Sets	R-HSA-9675108	Nervous system development	-6.6014	-3.97362	287,288,1072,1282,1759,2048,2064,3685,3897,4067,4155,4897,6091,6205,10487,55740	ANK2,ANK3,CFL1,COL4A1,DNM1,EPHB2,ERBB2,ITGAV,L1CAM,LYN,MBP,NRCAM,ROBO1,RPS11,CAP1,ENAH	16/559	TRUE	TRUE
5_Member	GO Biological Processes	GO:0050808	synapse organization	-6.43282	-3.84036	288,831,1004,1072,1282,2017,2048,2064,3897,4131,4897,10487,55740	ANK3,CAST,CDH6,CFL1,COL4A1,CTTN,EPHB2,ERBB2,L1CAM,MAP1B,NRCAM,CAP1,ENAH	13/371	TRUE	TRUE
5_Member	Reactome Gene Sets	R-HSA-422475	Axon guidance	-6.11764	-3.57861	287,288,1072,1282,1759,2048,2064,3685,3897,4067,4897,6091,6205,10487,55740	ANK2,ANK3,CFL1,COL4A1,DNM1,EPHB2,ERBB2,ITGAV,L1CAM,LYN,NRCAM,ROBO1,RPS11,CAP1,ENAH	15/534	TRUE	TRUE
5_Member	Reactome Gene Sets	R-HSA-373760	L1CAM interactions	-5.11495	-2.80622	287,288,1759,2048,3685,3897,4897	ANK2,ANK3,DNM1,EPHB2,ITGAV,L1CAM,NRCAM	7/120	TRUE	TRUE
5_Member	Reactome Gene Sets	R-HSA-445095	Interaction between L1 and Ankyrins	-4.48184	-2.2954	287,288,3897,4897	ANK2,ANK3,L1CAM,NRCAM	4/31	TRUE	TRUE
5_Member	GO Cellular Components	GO:0098794	postsynapse	-4.16904	-2.06044	287,288,1072,1756,2017,2048,4067,4131,4897,10487,23136,23673,25921,55740,57468	ANK2,ANK3,CFL1,DMD,CTTN,EPHB2,LYN,MAP1B,NRCAM,CAP1,EPB41L3,STX12,ZDHHC5,ENAH,SLC12A5	15/780	TRUE	TRUE
5_Member	GO Cellular Components	GO:0097060	synaptic membrane	-2.26113	-0.551804	287,288,1072,1756,2048,2064,4897,57468	ANK2,ANK3,CFL1,DMD,EPHB2,ERBB2,NRCAM,SLC12A5	8/449	TRUE	FALSE
6_Summary	GO Cellular Components	GO:0030139	endocytic vesicle	-11.1945	-7.8373	19,1759,2017,2317,2319,3685,4035,4067,8673,9779,23580,23673,25921,26119,26130,27333,51143,80223,23256	ABCA1,DNM1,CTTN,FLNB,FLOT2,ITGAV,LRP1,LYN,VAMP8,TBC1D5,CDC42EP4,STX12,ZDHHC5,LDLRAP1,GAPVD1,GOLIM4,DYNC1LI1,RAB11FIP1,SCFD1	19/-	TRUE	TRUE
6_Member	GO Cellular Components	GO:0030139	endocytic vesicle	-11.1945	-7.8373	19,1759,2017,2317,2319,3685,4035,4067,8673,9779,23580,23673,25921,26119,26130,27333,51143,80223	ABCA1,DNM1,CTTN,FLNB,FLOT2,ITGAV,LRP1,LYN,VAMP8,TBC1D5,CDC42EP4,STX12,ZDHHC5,LDLRAP1,GAPVD1,GOLIM4,DYNC1LI1,RAB11FIP1	18/361	TRUE	TRUE
6_Member	GO Cellular Components	GO:0045335	phagocytic vesicle	-5.52283	-3.13279	19,2317,3685,8673,23580,23673,25921,80223	ABCA1,FLNB,ITGAV,VAMP8,CDC42EP4,STX12,ZDHHC5,RAB11FIP1	8/148	TRUE	TRUE
6_Member	GO Molecular Functions	GO:0000149	SNARE binding	-2.41844	-0.677815	19,8673,23256,23673	ABCA1,VAMP8,SCFD1,STX12	4/107	TRUE	FALSE
6_Member	GO Molecular Functions	GO:0019905	syntaxin binding	-2.24354	-0.537756	19,8673,23256	ABCA1,VAMP8,SCFD1	3/61	TRUE	FALSE
7_Summary	GO Cellular Components	GO:0030016	myofibril	-10.7054	-7.45292	287,288,800,1756,2317,3728,3856,6840,7168,7286,7414,23022,25802,91624,171024	ANK2,ANK3,CALD1,DMD,FLNB,JUP,KRT8,SVIL,TPM1,TUFT1,VCL,PALLD,LMOD1,NEXN,SYNPO2	15/-	TRUE	TRUE
7_Member	GO Cellular Components	GO:0030016	myofibril	-10.7054	-7.45292	287,288,800,1756,2317,3728,3856,6840,7168,7286,7414,23022,25802,91624,171024	ANK2,ANK3,CALD1,DMD,FLNB,JUP,KRT8,SVIL,TPM1,TUFT1,VCL,PALLD,LMOD1,NEXN,SYNPO2	15/243	TRUE	TRUE
7_Member	GO Cellular Components	GO:0043292	contractile muscle fiber	-10.4572	-7.23465	287,288,800,1756,2317,3728,3856,6840,7168,7286,7414,23022,25802,91624,171024	ANK2,ANK3,CALD1,DMD,FLNB,JUP,KRT8,SVIL,TPM1,TUFT1,VCL,PALLD,LMOD1,NEXN,SYNPO2	15/253	TRUE	TRUE
7_Member	GO Cellular Components	GO:0030017	sarcomere	-8.01688	-5.17455	287,288,1756,2317,3728,3856,7168,7286,23022,25802,91624,171024	ANK2,ANK3,DMD,FLNB,JUP,KRT8,TPM1,TUFT1,PALLD,LMOD1,NEXN,SYNPO2	12/222	TRUE	TRUE
7_Member	GO Cellular Components	GO:0031674	I band	-7.62901	-4.87383	287,288,1756,2317,3728,3856,7286,23022,91624,171024	ANK2,ANK3,DMD,FLNB,JUP,KRT8,TUFT1,PALLD,NEXN,SYNPO2	10/150	TRUE	TRUE
7_Member	GO Cellular Components	GO:0030018	Z disc	-6.94765	-4.29721	287,288,1756,2317,3728,3856,23022,91624,171024	ANK2,ANK3,DMD,FLNB,JUP,KRT8,PALLD,NEXN,SYNPO2	9/134	TRUE	TRUE
7_Member	GO Molecular Functions	GO:0008307	structural constituent of muscle	-2.67463	-0.889834	1756,7168,91624	DMD,TPM1,NEXN	3/43	TRUE	FALSE
8_Summary	GO Biological Processes	GO:0032535	regulation of cellular component size	-10.2093	-7.01481	394,1072,1759,2017,2803,3897,4131,4897,6792,6840,10723,23499,23580,25802,57468,84335,253725,3269,80005,2064,6548,8091,23180,84717,1756,2048,4067,6091,150696,1601,51473,83481,23376,22985,23022	ARHGAP5,CFL1,DNM1,CTTN,GOLGA4,L1CAM,MAP1B,NRCAM,CDKL5,SVIL,SLC12A7,MACF1,CDC42EP4,LMOD1,SLC12A5,AKT1S1,WASHC2C,HRH1,DOCK5,ERBB2,SLC9A1,HMGA2,RFTN1,HDGFL2,DMD,EPHB2,LYN,ROBO1,PROM2,DAB2,DCDC2,EPPK1,UFL1,ACIN1,PALLD	35/-	TRUE	TRUE
8_Member	GO Biological Processes	GO:0032535	regulation of cellular component size	-10.2093	-7.01481	394,1072,1759,2017,2803,3897,4131,4897,6792,6840,10723,23499,23580,25802,57468,84335,253725	ARHGAP5,CFL1,DNM1,CTTN,GOLGA4,L1CAM,MAP1B,NRCAM,CDKL5,SVIL,SLC12A7,MACF1,CDC42EP4,LMOD1,SLC12A5,AKT1S1,WASHC2C	17/361	TRUE	TRUE
8_Member	GO Biological Processes	GO:0090066	regulation of anatomical structure size	-9.53747	-6.51904	394,1072,1759,2017,2803,3269,3897,4131,4897,6792,6840,10723,23499,23580,25802,57468,80005,84335,253725	ARHGAP5,CFL1,DNM1,CTTN,GOLGA4,HRH1,L1CAM,MAP1B,NRCAM,CDKL5,SVIL,SLC12A7,MACF1,CDC42EP4,LMOD1,SLC12A5,DOCK5,AKT1S1,WASHC2C	19/516	TRUE	TRUE
8_Member	GO Biological Processes	GO:0008361	regulation of cell size	-8.99299	-6.00933	394,1072,2017,2803,3897,4131,4897,6792,10723,23499,57468,84335	ARHGAP5,CFL1,CTTN,GOLGA4,L1CAM,MAP1B,NRCAM,CDKL5,SLC12A7,MACF1,SLC12A5,AKT1S1	12/182	TRUE	TRUE
8_Member	GO Biological Processes	GO:0045927	positive regulation of growth	-6.2722	-3.70608	1072,2064,2803,3897,4131,6548,6792,8091,23180,23499,84717	CFL1,ERBB2,GOLGA4,L1CAM,MAP1B,SLC9A1,CDKL5,HMGA2,RFTN1,MACF1,HDGFL2	11/263	TRUE	TRUE
8_Member	GO Biological Processes	GO:0030516	regulation of axon extension	-6.1557	-3.60217	2017,2803,3897,4131,4897,6792,23499	CTTN,GOLGA4,L1CAM,MAP1B,NRCAM,CDKL5,MACF1	7/84	TRUE	TRUE
8_Member	GO Biological Processes	GO:0030307	positive regulation of cell growth	-6.11392	-3.57861	1072,2064,2803,3897,4131,6548,6792,23499,84717	CFL1,ERBB2,GOLGA4,L1CAM,MAP1B,SLC9A1,CDKL5,MACF1,HDGFL2	9/168	TRUE	TRUE
8_Member	GO Biological Processes	GO:0031346	positive regulation of cell projection organization	-5.66633	-3.24542	1072,1756,2048,2803,3897,4067,4131,6091,6792,23499,23580,150696	CFL1,DMD,EPHB2,GOLGA4,L1CAM,LYN,MAP1B,ROBO1,CDKL5,MACF1,CDC42EP4,PROM2	12/367	TRUE	TRUE
8_Member	GO Biological Processes	GO:0061387	regulation of extent of cell growth	-5.6129	-3.20549	2017,2803,3897,4131,4897,6792,23499	CTTN,GOLGA4,L1CAM,MAP1B,NRCAM,CDKL5,MACF1	7/101	TRUE	TRUE
8_Member	GO Biological Processes	GO:0031344	regulation of cell projection organization	-5.55736	-3.16053	1072,1601,1756,2017,2048,2803,3897,4067,4131,4897,6091,6792,23499,23580,51473,150696	CFL1,DAB2,DMD,CTTN,EPHB2,GOLGA4,L1CAM,LYN,MAP1B,NRCAM,ROBO1,CDKL5,MACF1,CDC42EP4,DCDC2,PROM2	16/672	TRUE	TRUE
8_Member	GO Biological Processes	GO:0045773	positive regulation of axon extension	-5.47344	-3.09184	2803,3897,4131,6792,23499	GOLGA4,L1CAM,MAP1B,CDKL5,MACF1	5/39	TRUE	TRUE
8_Member	GO Biological Processes	GO:0040008	regulation of growth	-5.31568	-2.97294	1072,1601,2017,2064,2803,3897,4131,4897,6548,6792,8091,23180,23499,83481,84717	CFL1,DAB2,CTTN,ERBB2,GOLGA4,L1CAM,MAP1B,NRCAM,SLC9A1,CDKL5,HMGA2,RFTN1,MACF1,EPPK1,HDGFL2	15/621	TRUE	TRUE
8_Member	GO Biological Processes	GO:0050772	positive regulation of axonogenesis	-5.14641	-2.83056	2803,3897,4131,6091,6792,23499	GOLGA4,L1CAM,MAP1B,ROBO1,CDKL5,MACF1	6/78	TRUE	TRUE
8_Member	GO Biological Processes	GO:0001558	regulation of cell growth	-5.13346	-2.82119	1072,1601,2017,2064,2803,3897,4131,4897,6548,6792,23499,84717	CFL1,DAB2,CTTN,ERBB2,GOLGA4,L1CAM,MAP1B,NRCAM,SLC9A1,CDKL5,MACF1,HDGFL2	12/414	TRUE	TRUE
8_Member	GO Biological Processes	GO:0050769	positive regulation of neurogenesis	-4.92168	-2.63026	2048,2803,3897,4067,4131,6091,6792,23376,23499	EPHB2,GOLGA4,L1CAM,LYN,MAP1B,ROBO1,CDKL5,UFL1,MACF1	9/235	TRUE	TRUE
8_Member	GO Biological Processes	GO:0010975	regulation of neuron projection development	-4.79211	-2.53007	1072,1601,1756,2048,2803,3897,4067,4131,4897,6091,6792,23499	CFL1,DAB2,DMD,EPHB2,GOLGA4,L1CAM,LYN,MAP1B,NRCAM,ROBO1,CDKL5,MACF1	12/448	TRUE	TRUE
8_Member	GO Biological Processes	GO:0050770	regulation of axonogenesis	-4.5799	-2.35735	2048,2803,3897,4131,6091,6792,23499	EPHB2,GOLGA4,L1CAM,MAP1B,ROBO1,CDKL5,MACF1	7/145	TRUE	TRUE
8_Member	GO Biological Processes	GO:0048638	regulation of developmental growth	-4.50603	-2.29773	1072,2017,2803,3897,4131,4897,6792,8091,23499,83481	CFL1,CTTN,GOLGA4,L1CAM,MAP1B,NRCAM,CDKL5,HMGA2,MACF1,EPPK1	10/332	TRUE	TRUE
8_Member	GO Biological Processes	GO:0120035	regulation of plasma membrane bounded cell projection organization	-4.42526	-2.25963	1072,1601,1756,2048,2803,3897,4067,4131,4897,6091,6792,23499,23580,51473	CFL1,DAB2,DMD,EPHB2,GOLGA4,L1CAM,LYN,MAP1B,NRCAM,ROBO1,CDKL5,MACF1,CDC42EP4,DCDC2	14/653	TRUE	TRUE
8_Member	GO Biological Processes	GO:0051962	positive regulation of nervous system development	-4.19571	-2.07811	2048,2803,3897,4067,4131,6091,6792,23376,23499	EPHB2,GOLGA4,L1CAM,LYN,MAP1B,ROBO1,CDKL5,UFL1,MACF1	9/291	TRUE	TRUE
8_Member	GO Biological Processes	GO:0050767	regulation of neurogenesis	-4.03633	-1.97013	2048,2803,3897,4067,4131,6091,6792,8091,23376,23499	EPHB2,GOLGA4,L1CAM,LYN,MAP1B,ROBO1,CDKL5,HMGA2,UFL1,MACF1	10/378	TRUE	TRUE
8_Member	GO Biological Processes	GO:0010720	positive regulation of cell development	-3.42119	-1.47441	2048,2803,3897,4067,4131,6091,6792,22985,23376,23499	EPHB2,GOLGA4,L1CAM,LYN,MAP1B,ROBO1,CDKL5,ACIN1,UFL1,MACF1	10/451	TRUE	TRUE
8_Member	GO Biological Processes	GO:0051960	regulation of nervous system development	-3.31055	-1.38759	2048,2803,3897,4067,4131,6091,6792,8091,23376,23499	EPHB2,GOLGA4,L1CAM,LYN,MAP1B,ROBO1,CDKL5,HMGA2,UFL1,MACF1	10/466	TRUE	TRUE
8_Member	GO Cellular Components	GO:0030426	growth cone	-3.25065	-1.33916	1072,2017,3897,4131,6792,23022	CFL1,CTTN,L1CAM,MAP1B,CDKL5,PALLD	6/171	TRUE	TRUE
8_Member	GO Biological Processes	GO:0048639	positive regulation of developmental growth	-3.21098	-1.31204	2803,3897,4131,6792,8091,23499	GOLGA4,L1CAM,MAP1B,CDKL5,HMGA2,MACF1	6/174	TRUE	TRUE
8_Member	GO Cellular Components	GO:0030427	site of polarized growth	-3.18498	-1.2942	1072,2017,3897,4131,6792,23022	CFL1,CTTN,L1CAM,MAP1B,CDKL5,PALLD	6/176	TRUE	FALSE
8_Member	GO Cellular Components	GO:0150034	distal axon	-2.17892	-0.484438	1072,2017,3897,4131,6792,23022	CFL1,CTTN,L1CAM,MAP1B,CDKL5,PALLD	6/280	TRUE	FALSE
9_Summary	GO Biological Processes	GO:0000902	cell morphogenesis	-10.0829	-6.91475	288,1004,1009,2017,2048,2064,2317,3897,4067,4130,4131,4897,6091,7414,10487,10763,23022,23136,51062,51473,55740,57669,91624,1500,1829,3685,3691,3728,3875,5318,6793,22862,91179,140885,57468,85377,1072,4155,6792,26119	ANK3,CDH6,CDH11,CTTN,EPHB2,ERBB2,FLNB,L1CAM,LYN,MAP1A,MAP1B,NRCAM,ROBO1,VCL,CAP1,NES,PALLD,EPB41L3,ATL1,DCDC2,ENAH,EPB41L5,NEXN,CTNND1,DSG2,ITGAV,ITGB4,JUP,KRT18,PKP2,STK10,FNDC3A,SCARF2,SIRPA,SLC12A5,MICALL1,CFL1,MBP,CDKL5,LDLRAP1	40/-	TRUE	TRUE
9_Member	GO Biological Processes	GO:0000902	cell morphogenesis	-10.0829	-6.91475	288,1004,1009,2017,2048,2064,2317,3897,4067,4130,4131,4897,6091,7414,10487,10763,23022,23136,51062,51473,55740,57669,91624	ANK3,CDH6,CDH11,CTTN,EPHB2,ERBB2,FLNB,L1CAM,LYN,MAP1A,MAP1B,NRCAM,ROBO1,VCL,CAP1,NES,PALLD,EPB41L3,ATL1,DCDC2,ENAH,EPB41L5,NEXN	23/733	TRUE	TRUE
9_Member	GO Biological Processes	GO:0098609	cell-cell adhesion	-9.06389	-6.0632	1004,1009,1500,1829,3685,3691,3728,3875,3897,4897,5318,6091,6793,7414,22862,23022,91179,91624,140885	CDH6,CDH11,CTNND1,DSG2,ITGAV,ITGB4,JUP,KRT18,L1CAM,NRCAM,PKP2,ROBO1,STK10,VCL,FNDC3A,PALLD,SCARF2,NEXN,SIRPA	19/551	TRUE	TRUE
9_Member	GO Biological Processes	GO:0048858	cell projection morphogenesis	-8.60938	-5.68786	288,1009,2017,2048,2064,3897,4130,4131,4897,6091,7414,10763,23022,23136,51062,51473,55740,91624	ANK3,CDH11,CTTN,EPHB2,ERBB2,L1CAM,MAP1A,MAP1B,NRCAM,ROBO1,VCL,NES,PALLD,EPB41L3,ATL1,DCDC2,ENAH,NEXN	18/522	TRUE	TRUE
9_Member	GO Biological Processes	GO:0048812	neuron projection morphogenesis	-7.93948	-5.10905	288,1009,2017,2048,2064,3897,4130,4131,4897,6091,7414,23022,23136,51062,51473,55740,91624	ANK3,CDH11,CTTN,EPHB2,ERBB2,L1CAM,MAP1A,MAP1B,NRCAM,ROBO1,VCL,PALLD,EPB41L3,ATL1,DCDC2,ENAH,NEXN	17/510	TRUE	TRUE
9_Member	GO Biological Processes	GO:0120039	plasma membrane bounded cell projection morphogenesis	-7.8774	-5.05855	288,1009,2017,2048,2064,3897,4130,4131,4897,6091,7414,23022,23136,51062,51473,55740,91624	ANK3,CDH11,CTTN,EPHB2,ERBB2,L1CAM,MAP1A,MAP1B,NRCAM,ROBO1,VCL,PALLD,EPB41L3,ATL1,DCDC2,ENAH,NEXN	17/515	TRUE	TRUE
9_Member	GO Biological Processes	GO:0031175	neuron projection development	-7.79365	-5.0078	288,1009,2017,2048,2064,3897,4067,4130,4131,4897,6091,7414,23022,23136,51062,51473,55740,57468,85377,91624	ANK3,CDH11,CTTN,EPHB2,ERBB2,L1CAM,LYN,MAP1A,MAP1B,NRCAM,ROBO1,VCL,PALLD,EPB41L3,ATL1,DCDC2,ENAH,SLC12A5,MICALL1,NEXN	20/733	TRUE	TRUE
9_Member	GO Biological Processes	GO:0007409	axonogenesis	-7.11266	-4.41335	288,1009,2048,2064,3897,4130,4131,4897,6091,7414,23022,51062,55740,91624	ANK3,CDH11,EPHB2,ERBB2,L1CAM,MAP1A,MAP1B,NRCAM,ROBO1,VCL,PALLD,ATL1,ENAH,NEXN	14/383	TRUE	TRUE
9_Member	GO Biological Processes	GO:0048667	cell morphogenesis involved in neuron differentiation	-6.87849	-4.23573	288,1009,2048,2064,3897,4130,4131,4897,6091,7414,23022,51062,51473,55740,91624	ANK3,CDH11,EPHB2,ERBB2,L1CAM,MAP1A,MAP1B,NRCAM,ROBO1,VCL,PALLD,ATL1,DCDC2,ENAH,NEXN	15/465	TRUE	TRUE
9_Member	GO Biological Processes	GO:0061564	axon development	-6.37034	-3.79125	288,1009,2048,2064,3897,4130,4131,4897,6091,7414,23022,51062,55740,91624	ANK3,CDH11,EPHB2,ERBB2,L1CAM,MAP1A,MAP1B,NRCAM,ROBO1,VCL,PALLD,ATL1,ENAH,NEXN	14/441	TRUE	TRUE
9_Member	GO Cellular Components	GO:0030424	axon	-5.62373	-3.21187	288,1072,2017,2048,3897,4130,4131,4155,4897,6091,6792,23022,23136,26119,51062,91624	ANK3,CFL1,CTTN,EPHB2,L1CAM,MAP1A,MAP1B,MBP,NRCAM,ROBO1,CDKL5,PALLD,EPB41L3,LDLRAP1,ATL1,NEXN	16/664	TRUE	TRUE
9_Member	GO Biological Processes	GO:0008038	neuron recognition	-5.01881	-2.72055	2048,4897,6091,23022,91624	EPHB2,NRCAM,ROBO1,PALLD,NEXN	5/48	TRUE	TRUE
9_Member	GO Molecular Functions	GO:0008046	axon guidance receptor activity	-4.48807	-2.2954	2048,3897,6091	EPHB2,L1CAM,ROBO1	3/11	TRUE	TRUE
9_Member	GO Biological Processes	GO:0007156	homophilic cell adhesion via plasma membrane adhesion molecules	-4.18922	-2.07389	1004,1009,1829,3897,6091,23022,91624	CDH6,CDH11,DSG2,L1CAM,ROBO1,PALLD,NEXN	7/167	TRUE	TRUE
9_Member	GO Biological Processes	GO:0007411	axon guidance	-4.1	-2.01342	2048,2064,3897,4897,6091,23022,55740,91624	EPHB2,ERBB2,L1CAM,NRCAM,ROBO1,PALLD,ENAH,NEXN	8/233	TRUE	TRUE
9_Member	GO Biological Processes	GO:0097485	neuron projection guidance	-4.08706	-2.00649	2048,2064,3897,4897,6091,23022,55740,91624	EPHB2,ERBB2,L1CAM,NRCAM,ROBO1,PALLD,ENAH,NEXN	8/234	TRUE	TRUE
9_Member	GO Biological Processes	GO:0098742	cell-cell adhesion via plasma-membrane adhesion molecules	-3.77205	-1.75182	1004,1009,1829,3897,6091,23022,91179,91624	CDH6,CDH11,DSG2,L1CAM,ROBO1,PALLD,SCARF2,NEXN	8/260	TRUE	TRUE
9_Member	GO Biological Processes	GO:0008037	cell recognition	-2.76855	-0.964639	2048,4897,6091,23022,91624	EPHB2,NRCAM,ROBO1,PALLD,NEXN	5/144	TRUE	FALSE
9_Member	KEGG Pathway	hsa04360	Axon guidance	-2.3115	-0.595909	1072,2048,3897,6091,55740	CFL1,EPHB2,L1CAM,ROBO1,ENAH	5/184	TRUE	FALSE
10_Summary	GO Molecular Functions	GO:0098631	cell adhesion mediator activity	-10.058	-6.91462	1500,1829,3728,3875,4162,4897,5318,23022,91624,140885,287,288,1282,1756,3685,3691,7168,7414,25802,171024,2319,6548,2017,80005,54206,1147,2317,4638,6840,10290,84717,283149,800,3269,1601,65266,57669,9590,23376,4035,2312,63895	CTNND1,DSG2,JUP,KRT18,MCAM,NRCAM,PKP2,PALLD,NEXN,SIRPA,ANK2,ANK3,COL4A1,DMD,ITGAV,ITGB4,TPM1,VCL,LMOD1,SYNPO2,FLOT2,SLC9A1,CTTN,DOCK5,ERRFI1,CHUK,FLNB,MYLK,SVIL,SPEG,HDGFL2,BCL9L,CALD1,HRH1,DAB2,WNK4,EPB41L5,AKAP12,UFL1,LRP1,FLG,PIEZO2	42/-	TRUE	TRUE
10_Member	GO Molecular Functions	GO:0098631	cell adhesion mediator activity	-10.058	-6.91462	1500,1829,3728,3875,4162,4897,5318,23022,91624,140885	CTNND1,DSG2,JUP,KRT18,MCAM,NRCAM,PKP2,PALLD,NEXN,SIRPA	10/85	TRUE	TRUE
10_Member	GO Molecular Functions	GO:0098632	cell-cell adhesion mediator activity	-10.013	-6.8931	1500,1829,3728,3875,4897,5318,23022,91624,140885	CTNND1,DSG2,JUP,KRT18,NRCAM,PKP2,PALLD,NEXN,SIRPA	9/61	TRUE	TRUE
10_Member	KEGG Pathway	hsa04820	Cytoskeleton in muscle cells	-8.8309	-5.87942	287,288,1282,1756,1829,3685,3691,3728,5318,7168,7414,25802,171024	ANK2,ANK3,COL4A1,DMD,DSG2,ITGAV,ITGB4,JUP,PKP2,TPM1,VCL,LMOD1,SYNPO2	13/232	TRUE	TRUE
10_Member	GO Molecular Functions	GO:0086080	protein binding involved in heterotypic cell-cell adhesion	-8.27871	-5.39859	1829,3728,4897,5318,140885	DSG2,JUP,NRCAM,PKP2,SIRPA	5/12	TRUE	TRUE
10_Member	GO Cellular Components	GO:0044291	cell-cell contact zone	-7.80947	-5.0078	287,288,1829,2319,3728,5318,6548,7414	ANK2,ANK3,DSG2,FLOT2,JUP,PKP2,SLC9A1,VCL	8/75	TRUE	TRUE
10_Member	GO Cellular Components	GO:0014704	intercalated disc	-7.73878	-4.9634	287,288,1829,3728,5318,6548,7414	ANK2,ANK3,DSG2,JUP,PKP2,SLC9A1,VCL	7/50	TRUE	TRUE
10_Member	GO Biological Processes	GO:0034113	heterotypic cell-cell adhesion	-7.02999	-4.36375	1829,3685,3728,4897,5318,140885	DSG2,ITGAV,JUP,NRCAM,PKP2,SIRPA	6/38	TRUE	TRUE
10_Member	GO Biological Processes	GO:0006937	regulation of muscle contraction	-5.84422	-3.36466	287,1756,1829,2017,3728,5318,6548,7168,80005	ANK2,DMD,DSG2,CTTN,JUP,PKP2,SLC9A1,TPM1,DOCK5	9/181	TRUE	TRUE
10_Member	GO Molecular Functions	GO:0086083	cell adhesive protein binding involved in bundle of His cell-Purkinje myocyte communication	-5.69417	-3.26402	1829,3728,5318	DSG2,JUP,PKP2	3/5	TRUE	TRUE
10_Member	GO Biological Processes	GO:0086073	bundle of His cell-Purkinje myocyte adhesion involved in cell communication	-5.39504	-3.02983	1829,3728,5318	DSG2,JUP,PKP2	3/6	TRUE	TRUE
10_Member	GO Biological Processes	GO:0090257	regulation of muscle system process	-5.33823	-2.98492	287,1756,1829,2017,3728,5318,6548,7168,54206,80005	ANK2,DMD,DSG2,CTTN,JUP,PKP2,SLC9A1,TPM1,ERRFI1,DOCK5	10/266	TRUE	TRUE
10_Member	GO Biological Processes	GO:0061061	muscle structure development	-5.32397	-2.97456	287,1147,1756,2317,4638,5318,6548,6840,7168,10290,25802,80005,84717,283149	ANK2,CHUK,DMD,FLNB,MYLK,PKP2,SLC9A1,SVIL,TPM1,SPEG,LMOD1,DOCK5,HDGFL2,BCL9L	14/542	TRUE	TRUE
10_Member	GO Biological Processes	GO:0086042	cardiac muscle cell-cardiac muscle cell adhesion	-5.1539	-2.83445	1829,3728,5318	DSG2,JUP,PKP2	3/7	TRUE	TRUE
10_Member	KEGG Pathway	hsa05412	Arrhythmogenic right ventricular cardiomyopathy	-4.90083	-2.61614	1756,1829,3685,3691,3728,5318	DMD,DSG2,ITGAV,ITGB4,JUP,PKP2	6/86	TRUE	TRUE
10_Member	GO Biological Processes	GO:0055117	regulation of cardiac muscle contraction	-4.87192	-2.59386	287,1756,1829,3728,5318,6548	ANK2,DMD,DSG2,JUP,PKP2,SLC9A1	6/87	TRUE	TRUE
10_Member	GO Biological Processes	GO:0006936	muscle contraction	-4.79198	-2.53007	287,800,1147,1756,4638,5318,6548,7168,25802	ANK2,CALD1,CHUK,DMD,MYLK,PKP2,SLC9A1,TPM1,LMOD1	9/244	TRUE	TRUE
10_Member	GO Cellular Components	GO:0030057	desmosome	-4.53983	-2.32589	1829,3728,5318,7414	DSG2,JUP,PKP2,VCL	4/30	TRUE	TRUE
10_Member	GO Molecular Functions	GO:0045294	alpha-catenin binding	-4.48807	-2.2954	3728,5318,7414	JUP,PKP2,VCL	3/11	TRUE	TRUE
10_Member	GO Biological Processes	GO:0098901	regulation of cardiac muscle cell action potential	-4.48184	-2.2954	287,1829,3728,5318	ANK2,DSG2,JUP,PKP2	4/31	TRUE	TRUE
10_Member	GO Biological Processes	GO:1903522	regulation of blood circulation	-4.37274	-2.21262	287,1756,1829,3269,3728,5318,6548,7168,80005	ANK2,DMD,DSG2,HRH1,JUP,PKP2,SLC9A1,TPM1,DOCK5	9/276	TRUE	TRUE
10_Member	GO Biological Processes	GO:0098900	regulation of action potential	-4.37071	-2.21262	287,1829,3728,5318,6548	ANK2,DSG2,JUP,PKP2,SLC9A1	5/65	TRUE	TRUE
10_Member	GO Biological Processes	GO:0098911	regulation of ventricular cardiac muscle cell action potential	-4.36503	-2.21237	1829,3728,5318	DSG2,JUP,PKP2	3/12	TRUE	TRUE
10_Member	GO Biological Processes	GO:0006942	regulation of striated muscle contraction	-4.36058	-2.21237	287,1756,1829,3728,5318,6548	ANK2,DMD,DSG2,JUP,PKP2,SLC9A1	6/107	TRUE	TRUE
10_Member	GO Biological Processes	GO:0002027	regulation of heart rate	-4.24935	-2.11317	287,1756,1829,3728,5318,7168	ANK2,DMD,DSG2,JUP,PKP2,TPM1	6/112	TRUE	TRUE
10_Member	GO Biological Processes	GO:0061337	cardiac conduction	-4.24527	-2.11145	287,1829,3728,5318,6548	ANK2,DSG2,JUP,PKP2,SLC9A1	5/69	TRUE	TRUE
10_Member	GO Biological Processes	GO:0044057	regulation of system process	-4.22821	-2.09865	287,1601,1756,1829,2017,3269,3728,5318,6548,7168,54206,65266,80005	ANK2,DAB2,DMD,DSG2,CTTN,HRH1,JUP,PKP2,SLC9A1,TPM1,ERRFI1,WNK4,DOCK5	13/595	TRUE	TRUE
10_Member	GO Biological Processes	GO:0086069	bundle of His cell to Purkinje myocyte communication	-4.15014	-2.05036	1829,3728,5318	DSG2,JUP,PKP2	3/14	TRUE	TRUE
10_Member	GO Biological Processes	GO:0086004	regulation of cardiac muscle cell contraction	-4.12556	-2.03013	287,1829,3728,5318	ANK2,DSG2,JUP,PKP2	4/38	TRUE	TRUE
10_Member	GO Biological Processes	GO:0042692	muscle cell differentiation	-4.11681	-2.02353	287,1147,1756,6548,7168,10290,25802,80005,84717	ANK2,CHUK,DMD,SLC9A1,TPM1,SPEG,LMOD1,DOCK5,HDGFL2	9/298	TRUE	TRUE
10_Member	GO Biological Processes	GO:0003012	muscle system process	-4.06182	-1.98333	287,800,1147,1756,4638,5318,6548,7168,25802	ANK2,CALD1,CHUK,DMD,MYLK,PKP2,SLC9A1,TPM1,LMOD1	9/303	TRUE	TRUE
10_Member	GO Biological Processes	GO:0002934	desmosome organization	-4.05513	-1.97871	1829,3728,5318	DSG2,JUP,PKP2	3/15	TRUE	TRUE
10_Member	GO Biological Processes	GO:0086065	cell communication involved in cardiac conduction	-3.95278	-1.90433	287,1829,3728,5318	ANK2,DSG2,JUP,PKP2	4/42	TRUE	TRUE
10_Member	GO Biological Processes	GO:0086091	regulation of heart rate by cardiac conduction	-3.91238	-1.87547	287,1829,3728,5318	ANK2,DSG2,JUP,PKP2	4/43	TRUE	TRUE
10_Member	GO Biological Processes	GO:1903115	regulation of actin filament-based movement	-3.91238	-1.87547	287,1829,3728,5318	ANK2,DSG2,JUP,PKP2	4/43	TRUE	TRUE
10_Member	GO Biological Processes	GO:0006941	striated muscle contraction	-3.89078	-1.85763	287,1147,1756,5318,6548,7168	ANK2,CHUK,DMD,PKP2,SLC9A1,TPM1	6/130	TRUE	TRUE
10_Member	GO Biological Processes	GO:0070252	actin-mediated cell contraction	-3.81321	-1.78749	287,5318,6548,7168,57669	ANK2,PKP2,SLC9A1,TPM1,EPB41L5	5/85	TRUE	TRUE
10_Member	GO Biological Processes	GO:0060048	cardiac muscle contraction	-3.78927	-1.76538	287,1756,5318,6548,7168	ANK2,DMD,PKP2,SLC9A1,TPM1	5/86	TRUE	TRUE
10_Member	GO Biological Processes	GO:0007517	muscle organ development	-3.78284	-1.76079	1756,2317,4638,5318,6840,7168,10290,84717,283149	DMD,FLNB,MYLK,PKP2,SVIL,TPM1,SPEG,HDGFL2,BCL9L	9/330	TRUE	TRUE
10_Member	GO Biological Processes	GO:0060537	muscle tissue development	-3.46056	-1.5061	1756,1829,2317,4638,5318,6548,6840,7168,283149	DMD,DSG2,FLNB,MYLK,PKP2,SLC9A1,SVIL,TPM1,BCL9L	9/365	TRUE	TRUE
10_Member	GO Biological Processes	GO:0008015	blood circulation	-3.45913	-1.5061	287,1756,3269,5318,6548,7168,9590,23376,65266,80005	ANK2,DMD,HRH1,PKP2,SLC9A1,TPM1,AKAP12,UFL1,WNK4,DOCK5	10/446	TRUE	TRUE
10_Member	GO Biological Processes	GO:0060047	heart contraction	-3.44364	-1.49216	287,1756,5318,6548,7168	ANK2,DMD,PKP2,SLC9A1,TPM1	5/102	TRUE	TRUE
10_Member	GO Biological Processes	GO:0008016	regulation of heart contraction	-3.42783	-1.47791	287,1756,1829,3728,5318,6548,7168	ANK2,DMD,DSG2,JUP,PKP2,SLC9A1,TPM1	7/222	TRUE	TRUE
10_Member	GO Biological Processes	GO:0003013	circulatory system process	-3.41973	-1.47441	287,1756,3269,4035,5318,6548,7168,9590,23376,65266,80005	ANK2,DMD,HRH1,LRP1,PKP2,SLC9A1,TPM1,AKAP12,UFL1,WNK4,DOCK5	11/537	TRUE	TRUE
10_Member	GO Cellular Components	GO:0001533	cornified envelope	-3.34962	-1.41933	1829,2312,3728,5318	DSG2,FLG,JUP,PKP2	4/60	TRUE	TRUE
10_Member	GO Biological Processes	GO:0030048	actin filament-based movement	-3.32947	-1.40212	287,5318,6548,7168,57669	ANK2,PKP2,SLC9A1,TPM1,EPB41L5	5/108	TRUE	TRUE
10_Member	GO Biological Processes	GO:0034109	homotypic cell-cell adhesion	-3.21708	-1.31537	1829,3728,5318,7414	DSG2,JUP,PKP2,VCL	4/65	TRUE	TRUE
10_Member	GO Biological Processes	GO:0003015	heart process	-3.20501	-1.30881	287,1756,5318,6548,7168	ANK2,DMD,PKP2,SLC9A1,TPM1	5/115	TRUE	TRUE
10_Member	GO Biological Processes	GO:0014706	striated muscle tissue development	-2.96931	-1.11846	1756,1829,2317,5318,6548,6840,7168,283149	DMD,DSG2,FLNB,PKP2,SLC9A1,SVIL,TPM1,BCL9L	8/344	TRUE	FALSE
10_Member	GO Biological Processes	GO:0010882	regulation of cardiac muscle contraction by calcium ion signaling	-2.93501	-1.09509	287,1756,6548	ANK2,DMD,SLC9A1	3/35	TRUE	FALSE
10_Member	GO Biological Processes	GO:0042391	regulation of membrane potential	-2.66624	-0.883552	287,288,1756,1829,3728,4897,5318,6548,63895	ANK2,ANK3,DMD,DSG2,JUP,NRCAM,PKP2,SLC9A1,PIEZO2	9/474	TRUE	FALSE
10_Member	GO Biological Processes	GO:0086003	cardiac muscle cell contraction	-2.36961	-0.639891	287,5318,6548	ANK2,PKP2,SLC9A1	3/55	TRUE	FALSE
10_Member	GO Biological Processes	GO:0003229	ventricular cardiac muscle tissue development	-2.22387	-0.520721	1829,5318,7168	DSG2,PKP2,TPM1	3/62	TRUE	FALSE
11_Summary	GO Biological Processes	GO:0051493	regulation of cytoskeleton organization	-9.96465	-6.86705	1072,2017,4035,4130,4131,6249,6548,6840,7168,7175,10432,10763,23580,25802,55616,57606,91624,171024,253725,387680,287,1829,3728,5318,19,2048,25921,57669,1601,23256,140885,146691,150696	CFL1,CTTN,LRP1,MAP1A,MAP1B,CLIP1,SLC9A1,SVIL,TPM1,TPR,RBM14,NES,CDC42EP4,LMOD1,ASAP3,SLAIN2,NEXN,SYNPO2,WASHC2C,WASHC2A,ANK2,DSG2,JUP,PKP2,ABCA1,EPHB2,ZDHHC5,EPB41L5,DAB2,SCFD1,SIRPA,TOM1L2,PROM2	33/-	TRUE	TRUE
11_Member	GO Biological Processes	GO:0051493	regulation of cytoskeleton organization	-9.96465	-6.86705	1072,2017,4035,4130,4131,6249,6548,6840,7168,7175,10432,10763,23580,25802,55616,57606,91624,171024,253725,387680	CFL1,CTTN,LRP1,MAP1A,MAP1B,CLIP1,SLC9A1,SVIL,TPM1,TPR,RBM14,NES,CDC42EP4,LMOD1,ASAP3,SLAIN2,NEXN,SYNPO2,WASHC2C,WASHC2A	20/547	TRUE	TRUE
11_Member	GO Biological Processes	GO:0032970	regulation of actin filament-based process	-8.58087	-5.6736	287,1072,1829,2017,3728,4035,5318,6548,6840,7168,23580,25802,55616,171024,253725,387680	ANK2,CFL1,DSG2,CTTN,JUP,LRP1,PKP2,SLC9A1,SVIL,TPM1,CDC42EP4,LMOD1,ASAP3,SYNPO2,WASHC2C,WASHC2A	16/402	TRUE	TRUE
11_Member	GO Biological Processes	GO:1902903	regulation of supramolecular fiber organization	-7.80354	-5.0078	1072,2017,4130,4131,6249,6548,6840,7168,23580,25802,55616,57606,171024,253725,387680	CFL1,CTTN,MAP1A,MAP1B,CLIP1,SLC9A1,SVIL,TPM1,CDC42EP4,LMOD1,ASAP3,SLAIN2,SYNPO2,WASHC2C,WASHC2A	15/395	TRUE	TRUE
11_Member	GO Biological Processes	GO:0051495	positive regulation of cytoskeleton organization	-7.67629	-4.91112	1072,2017,4131,6249,7168,10763,23580,25802,57606,171024,253725	CFL1,CTTN,MAP1B,CLIP1,TPM1,NES,CDC42EP4,LMOD1,SLAIN2,SYNPO2,WASHC2C	11/191	TRUE	TRUE
11_Member	GO Biological Processes	GO:1902905	positive regulation of supramolecular fiber organization	-6.97217	-4.3139	1072,2017,4131,6249,7168,23580,25802,57606,171024,253725	CFL1,CTTN,MAP1B,CLIP1,TPM1,CDC42EP4,LMOD1,SLAIN2,SYNPO2,WASHC2C	10/176	TRUE	TRUE
11_Member	GO Biological Processes	GO:0044089	positive regulation of cellular component biogenesis	-6.11764	-3.57861	19,1072,2017,2048,4131,6249,7168,7175,23580,25802,25921,57606,57669,171024,253725	ABCA1,CFL1,CTTN,EPHB2,MAP1B,CLIP1,TPM1,TPR,CDC42EP4,LMOD1,ZDHHC5,SLAIN2,EPB41L5,SYNPO2,WASHC2C	15/534	TRUE	TRUE
11_Member	GO Biological Processes	GO:0110053	regulation of actin filament organization	-6.09706	-3.568	1072,2017,6548,6840,7168,23580,25802,55616,171024,253725,387680	CFL1,CTTN,SLC9A1,SVIL,TPM1,CDC42EP4,LMOD1,ASAP3,SYNPO2,WASHC2C,WASHC2A	11/274	TRUE	TRUE
11_Member	GO Biological Processes	GO:0032273	positive regulation of protein polymerization	-5.91869	-3.42314	2017,4131,6249,23580,25802,57606,253725	CTTN,MAP1B,CLIP1,CDC42EP4,LMOD1,SLAIN2,WASHC2C	7/91	TRUE	TRUE
11_Member	GO Biological Processes	GO:0032956	regulation of actin cytoskeleton organization	-5.79037	-3.31601	1072,2017,4035,6548,6840,7168,23580,25802,55616,171024,253725,387680	CFL1,CTTN,LRP1,SLC9A1,SVIL,TPM1,CDC42EP4,LMOD1,ASAP3,SYNPO2,WASHC2C,WASHC2A	12/357	TRUE	TRUE
11_Member	GO Biological Processes	GO:1901879	regulation of protein depolymerization	-5.76139	-3.29725	1072,4130,4131,6840,10763,25802,253725	CFL1,MAP1A,MAP1B,SVIL,NES,LMOD1,WASHC2C	7/96	TRUE	TRUE
11_Member	GO Biological Processes	GO:0032271	regulation of protein polymerization	-5.45197	-3.07864	1072,2017,4131,6249,6840,23580,25802,57606,253725	CFL1,CTTN,MAP1B,CLIP1,SVIL,CDC42EP4,LMOD1,SLAIN2,WASHC2C	9/202	TRUE	TRUE
11_Member	GO Biological Processes	GO:0031334	positive regulation of protein-containing complex assembly	-5.31467	-2.97294	19,2017,4131,6249,23580,25802,25921,57606,253725	ABCA1,CTTN,MAP1B,CLIP1,CDC42EP4,LMOD1,ZDHHC5,SLAIN2,WASHC2C	9/210	TRUE	TRUE
11_Member	GO Biological Processes	GO:0043244	regulation of protein-containing complex disassembly	-4.78043	-2.52264	1072,4130,4131,6840,10763,25802,253725	CFL1,MAP1A,MAP1B,SVIL,NES,LMOD1,WASHC2C	7/135	TRUE	TRUE
11_Member	GO Biological Processes	GO:0010638	positive regulation of organelle organization	-4.21369	-2.09152	1072,2017,4131,6249,7168,7175,10763,23580,25802,57606,171024,253725	CFL1,CTTN,MAP1B,CLIP1,TPM1,TPR,NES,CDC42EP4,LMOD1,SLAIN2,SYNPO2,WASHC2C	12/514	TRUE	TRUE
11_Member	GO Biological Processes	GO:0043254	regulation of protein-containing complex assembly	-4.1852	-2.07213	19,1072,2017,4131,6249,6840,23580,25802,25921,57606,253725	ABCA1,CFL1,CTTN,MAP1B,CLIP1,SVIL,CDC42EP4,LMOD1,ZDHHC5,SLAIN2,WASHC2C	11/438	TRUE	TRUE
11_Member	GO Biological Processes	GO:0030833	regulation of actin filament polymerization	-3.89078	-1.85763	1072,2017,6840,23580,25802,253725	CFL1,CTTN,SVIL,CDC42EP4,LMOD1,WASHC2C	6/130	TRUE	TRUE
11_Member	GO Biological Processes	GO:1901881	positive regulation of protein depolymerization	-3.60064	-1.61194	1072,10763,253725	CFL1,NES,WASHC2C	3/21	TRUE	TRUE
11_Member	GO Biological Processes	GO:0030838	positive regulation of actin filament polymerization	-3.58921	-1.60554	2017,23580,25802,253725	CTTN,CDC42EP4,LMOD1,WASHC2C	4/52	TRUE	TRUE
11_Member	GO Biological Processes	GO:0008064	regulation of actin polymerization or depolymerization	-3.55327	-1.57294	1072,2017,6840,23580,25802,253725	CFL1,CTTN,SVIL,CDC42EP4,LMOD1,WASHC2C	6/150	TRUE	TRUE
11_Member	GO Biological Processes	GO:0030832	regulation of actin filament length	-3.50713	-1.53986	1072,2017,6840,23580,25802,253725	CFL1,CTTN,SVIL,CDC42EP4,LMOD1,WASHC2C	6/153	TRUE	TRUE
11_Member	GO Biological Processes	GO:0030834	regulation of actin filament depolymerization	-3.46472	-1.50699	1072,6840,25802,253725	CFL1,SVIL,LMOD1,WASHC2C	4/56	TRUE	TRUE
11_Member	GO Biological Processes	GO:0051129	negative regulation of cellular component organization	-3.30699	-1.38681	1072,1601,2048,4131,6840,7175,10432,23256,25802,140885,146691,150696,253725	CFL1,DAB2,EPHB2,MAP1B,SVIL,TPR,RBM14,SCFD1,LMOD1,SIRPA,TOM1L2,PROM2,WASHC2C	13/740	TRUE	TRUE
11_Member	GO Biological Processes	GO:1901880	negative regulation of protein depolymerization	-3.04932	-1.18471	1072,4131,6840,25802	CFL1,MAP1B,SVIL,LMOD1	4/72	TRUE	FALSE
11_Member	GO Biological Processes	GO:0010639	negative regulation of organelle organization	-2.96128	-1.11653	1072,4131,6840,7175,10432,23256,25802,146691	CFL1,MAP1B,SVIL,TPR,RBM14,SCFD1,LMOD1,TOM1L2	8/345	TRUE	FALSE
11_Member	GO Biological Processes	GO:0043242	negative regulation of protein-containing complex disassembly	-2.83874	-1.01875	1072,4131,6840,25802	CFL1,MAP1B,SVIL,LMOD1	4/82	TRUE	FALSE
11_Member	GO Biological Processes	GO:0043243	positive regulation of protein-containing complex disassembly	-2.76558	-0.964639	1072,10763,253725	CFL1,NES,WASHC2C	3/40	TRUE	FALSE
11_Member	GO Biological Processes	GO:0030835	negative regulation of actin filament depolymerization	-2.73446	-0.938969	1072,6840,25802	CFL1,SVIL,LMOD1	3/41	TRUE	FALSE
11_Member	GO Biological Processes	GO:0051494	negative regulation of cytoskeleton organization	-2.55785	-0.791588	1072,4131,6840,10432,25802	CFL1,MAP1B,SVIL,RBM14,LMOD1	5/161	TRUE	FALSE
12_Summary	GO Biological Processes	GO:1990778	protein localization to cell periphery	-9.6527	-6.58516	287,288,2064,2319,2803,3728,3875,5318,8548,23136,23499,25921,26003,54206,7095,23180,23673,57468,85377,253725,23256	ANK2,ANK3,ERBB2,FLOT2,GOLGA4,JUP,KRT18,PKP2,BLZF1,EPB41L3,MACF1,ZDHHC5,GORASP2,ERRFI1,SEC62,RFTN1,STX12,SLC12A5,MICALL1,WASHC2C,SCFD1	21/-	TRUE	TRUE
12_Member	GO Biological Processes	GO:1990778	protein localization to cell periphery	-9.6527	-6.58516	287,288,2064,2319,2803,3728,3875,5318,8548,23136,23499,25921,26003,54206	ANK2,ANK3,ERBB2,FLOT2,GOLGA4,JUP,KRT18,PKP2,BLZF1,EPB41L3,MACF1,ZDHHC5,GORASP2,ERRFI1	14/242	TRUE	TRUE
12_Member	GO Biological Processes	GO:0051668	localization within membrane	-9.62482	-6.58516	287,288,2064,2319,2803,3728,3875,5318,7095,8548,23136,23180,23499,23673,25921,26003,54206,57468,85377,253725	ANK2,ANK3,ERBB2,FLOT2,GOLGA4,JUP,KRT18,PKP2,SEC62,BLZF1,EPB41L3,RFTN1,MACF1,STX12,ZDHHC5,GORASP2,ERRFI1,SLC12A5,MICALL1,WASHC2C	20/572	TRUE	TRUE
12_Member	GO Biological Processes	GO:0072659	protein localization to plasma membrane	-9.62207	-6.58516	287,288,2319,2803,3728,3875,5318,8548,23136,23499,25921,26003,54206	ANK2,ANK3,FLOT2,GOLGA4,JUP,KRT18,PKP2,BLZF1,EPB41L3,MACF1,ZDHHC5,GORASP2,ERRFI1	13/200	TRUE	TRUE
12_Member	GO Biological Processes	GO:0072657	protein localization to membrane	-8.34137	-5.44789	287,288,2064,2319,2803,3728,3875,5318,7095,8548,23136,23180,23499,25921,26003,54206,85377	ANK2,ANK3,ERBB2,FLOT2,GOLGA4,JUP,KRT18,PKP2,SEC62,BLZF1,EPB41L3,RFTN1,MACF1,ZDHHC5,GORASP2,ERRFI1,MICALL1	17/479	TRUE	TRUE
12_Member	GO Biological Processes	GO:0061951	establishment of protein localization to plasma membrane	-6.04496	-3.53282	288,2803,3875,8548,23499,26003	ANK3,GOLGA4,KRT18,BLZF1,MACF1,GORASP2	6/55	TRUE	TRUE
12_Member	GO Biological Processes	GO:0098876	vesicle-mediated transport to the plasma membrane	-5.75028	-3.29213	288,2803,3875,8548,23499,23673,85377,253725	ANK3,GOLGA4,KRT18,BLZF1,MACF1,STX12,MICALL1,WASHC2C	8/138	TRUE	TRUE
12_Member	GO Biological Processes	GO:0043001	Golgi to plasma membrane protein transport	-5.71397	-3.27891	288,2803,3875,8548,23499	ANK3,GOLGA4,KRT18,BLZF1,MACF1	5/35	TRUE	TRUE
12_Member	GO Biological Processes	GO:0090150	establishment of protein localization to membrane	-4.87781	-2.59645	288,2803,3875,7095,8548,23180,23499,26003,85377	ANK3,GOLGA4,KRT18,SEC62,BLZF1,RFTN1,MACF1,GORASP2,MICALL1	9/238	TRUE	TRUE
12_Member	GO Biological Processes	GO:0006893	Golgi to plasma membrane transport	-4.47049	-2.28934	288,2803,3875,8548,23499	ANK3,GOLGA4,KRT18,BLZF1,MACF1	5/62	TRUE	TRUE
12_Member	GO Biological Processes	GO:0006892	post-Golgi vesicle-mediated transport	-4.36058	-2.21237	288,2803,3875,8548,23256,23499	ANK3,GOLGA4,KRT18,BLZF1,SCFD1,MACF1	6/107	TRUE	TRUE
12_Member	GO Biological Processes	GO:0048193	Golgi vesicle transport	-2.01927	-0.353677	288,2803,3875,8548,23256,23499	ANK3,GOLGA4,KRT18,BLZF1,SCFD1,MACF1	6/303	TRUE	FALSE
13_Summary	GO Cellular Components	GO:0005938	cell cortex	-8.96259	-5.99532	800,1072,2017,2037,2317,2319,4082,6249,7414,7461,9590,10487,26064,57553,63895	CALD1,CFL1,CTTN,EPB41L2,FLNB,FLOT2,MARCKS,CLIP1,VCL,CLIP2,AKAP12,CAP1,RAI14,MICAL3,PIEZO2	15/-	TRUE	TRUE
13_Member	GO Cellular Components	GO:0005938	cell cortex	-8.96259	-5.99532	800,1072,2017,2037,2317,2319,4082,6249,7414,7461,9590,10487,26064,57553,63895	CALD1,CFL1,CTTN,EPB41L2,FLNB,FLOT2,MARCKS,CLIP1,VCL,CLIP2,AKAP12,CAP1,RAI14,MICAL3,PIEZO2	15/324	TRUE	TRUE
13_Member	GO Cellular Components	GO:0030863	cortical cytoskeleton	-6.47022	-3.87093	800,1072,2017,2037,2319,7414,10487,63895	CALD1,CFL1,CTTN,EPB41L2,FLOT2,VCL,CAP1,PIEZO2	8/111	TRUE	TRUE
13_Member	GO Cellular Components	GO:0030864	cortical actin cytoskeleton	-6.30113	-3.72857	800,1072,2037,2319,7414,10487,63895	CALD1,CFL1,EPB41L2,FLOT2,VCL,CAP1,PIEZO2	7/80	TRUE	TRUE
13_Member	GO Biological Processes	GO:0098885	modification of postsynaptic actin cytoskeleton	-4.36503	-2.21237	1072,2017,10487	CFL1,CTTN,CAP1	3/12	TRUE	TRUE
13_Member	GO Biological Processes	GO:0099010	modification of postsynaptic structure	-3.6657	-1.66326	1072,2017,10487	CFL1,CTTN,CAP1	3/20	TRUE	TRUE
13_Member	GO Biological Processes	GO:0099563	modification of synaptic structure	-3.53887	-1.56348	1072,2017,10487	CFL1,CTTN,CAP1	3/22	TRUE	TRUE
14_Summary	GO Cellular Components	GO:0032432	actin filament bundle	-8.21629	-5.34914	800,1072,2317,4082,4638,7168,23022,26064,171024,8476,7414,25802,1756	CALD1,CFL1,FLNB,MARCKS,MYLK,TPM1,PALLD,RAI14,SYNPO2,CDC42BPA,VCL,LMOD1,DMD	13/-	TRUE	TRUE
14_Member	GO Cellular Components	GO:0032432	actin filament bundle	-8.21629	-5.34914	800,1072,2317,4082,4638,7168,23022,26064,171024	CALD1,CFL1,FLNB,MARCKS,MYLK,TPM1,PALLD,RAI14,SYNPO2	9/96	TRUE	TRUE
14_Member	GO Cellular Components	GO:0042641	actomyosin	-7.06798	-4.39362	800,2317,4638,7168,8476,23022,26064,171024	CALD1,FLNB,MYLK,TPM1,CDC42BPA,PALLD,RAI14,SYNPO2	8/93	TRUE	TRUE
14_Member	GO Cellular Components	GO:0001725	stress fiber	-6.08583	-3.568	800,2317,4638,7168,23022,26064,171024	CALD1,FLNB,MYLK,TPM1,PALLD,RAI14,SYNPO2	7/86	TRUE	TRUE
14_Member	GO Cellular Components	GO:0097517	contractile actin filament bundle	-6.08583	-3.568	800,2317,4638,7168,23022,26064,171024	CALD1,FLNB,MYLK,TPM1,PALLD,RAI14,SYNPO2	7/86	TRUE	TRUE
14_Member	Reactome Gene Sets	R-HSA-445355	Smooth Muscle Contraction	-5.15917	-2.83445	800,4638,7168,7414,25802	CALD1,MYLK,TPM1,VCL,LMOD1	5/45	TRUE	TRUE
14_Member	Reactome Gene Sets	R-HSA-397014	Muscle contraction	-2.84316	-1.02201	800,1756,4638,7168,7414,25802	CALD1,DMD,MYLK,TPM1,VCL,LMOD1	6/205	TRUE	FALSE
15_Summary	GO Molecular Functions	GO:0008093	cytoskeletal anchor activity	-8.08327	-5.22871	287,288,3728,4130,23136,85377,4131,4155,4897,19,1759,8548,26003,51062,85462	ANK2,ANK3,JUP,MAP1A,EPB41L3,MICALL1,MAP1B,MBP,NRCAM,ABCA1,DNM1,BLZF1,GORASP2,ATL1,FHDC1	15/-	TRUE	TRUE
15_Member	GO Molecular Functions	GO:0008093	cytoskeletal anchor activity	-8.08327	-5.22871	287,288,3728,4130,23136,85377	ANK2,ANK3,JUP,MAP1A,EPB41L3,MICALL1	6/26	TRUE	TRUE
15_Member	GO Cellular Components	GO:0044304	main axon	-5.38522	-3.02401	288,4130,4131,4155,4897,23136	ANK3,MAP1A,MAP1B,MBP,NRCAM,EPB41L3	6/71	TRUE	TRUE
15_Member	GO Cellular Components	GO:0043194	axon initial segment	-3.42396	-1.47557	288,4130,4897	ANK3,MAP1A,NRCAM	3/24	TRUE	TRUE
15_Member	GO Biological Processes	GO:0010256	endomembrane system organization	-2.48611	-0.731917	19,287,288,1759,8548,23136,26003,51062,85377,85462	ABCA1,ANK2,ANK3,DNM1,BLZF1,EPB41L3,GORASP2,ATL1,MICALL1,FHDC1	10/602	TRUE	FALSE
16_Summary	GO Cellular Components	GO:0043034	costamere	-7.5455	-4.80007	287,288,1756,6840,7414,3856,6548,113146,2037,7168,23136,5318,65266,4897,4067,4638,1829	ANK2,ANK3,DMD,SVIL,VCL,KRT8,SLC9A1,AHNAK2,EPB41L2,TPM1,EPB41L3,PKP2,WNK4,NRCAM,LYN,MYLK,DSG2	17/-	TRUE	TRUE
16_Member	GO Cellular Components	GO:0043034	costamere	-7.5455	-4.80007	287,288,1756,6840,7414	ANK2,ANK3,DMD,SVIL,VCL	5/16	TRUE	TRUE
16_Member	GO Cellular Components	GO:0042383	sarcolemma	-4.69826	-2.45496	287,288,1756,3856,6548,7414,113146	ANK2,ANK3,DMD,KRT8,SLC9A1,VCL,AHNAK2	7/139	TRUE	TRUE
16_Member	GO Cellular Components	GO:0030315	T-tubule	-3.62197	-1.62473	287,288,6548,113146	ANK2,ANK3,SLC9A1,AHNAK2	4/51	TRUE	TRUE
16_Member	GO Molecular Functions	GO:0030507	spectrin binding	-3.26971	-1.35537	287,288,2037	ANK2,ANK3,EPB41L2	3/27	TRUE	TRUE
16_Member	GO Molecular Functions	GO:0005200	structural constituent of cytoskeleton	-3.20501	-1.30881	287,288,1756,7168,23136	ANK2,ANK3,DMD,TPM1,EPB41L3	5/115	TRUE	TRUE
16_Member	GO Biological Processes	GO:0002028	regulation of sodium ion transport	-2.96139	-1.11653	288,1756,5318,65266	ANK3,DMD,PKP2,WNK4	4/76	TRUE	FALSE
16_Member	GO Biological Processes	GO:0001508	action potential	-2.95036	-1.10923	287,288,1756,4897,5318	ANK2,ANK3,DMD,NRCAM,PKP2	5/131	TRUE	FALSE
16_Member	GO Biological Processes	GO:0086001	cardiac muscle cell action potential	-2.30477	-0.590086	287,1756,5318	ANK2,DMD,PKP2	3/58	TRUE	FALSE
16_Member	GO Biological Processes	GO:0010959	regulation of metal ion transport	-2.13051	-0.447876	287,288,1756,4067,4638,5318,65266	ANK2,ANK3,DMD,LYN,MYLK,PKP2,WNK4	7/377	TRUE	FALSE
16_Member	GO Cellular Components	GO:0016328	lateral plasma membrane	-2.11283	-0.431029	288,1756,1829	ANK3,DMD,DSG2	3/68	TRUE	FALSE
16_Member	GO Biological Processes	GO:1901379	regulation of potassium ion transmembrane transport	-2.01225	-0.349258	287,288,65266	ANK2,ANK3,WNK4	3/74	TRUE	FALSE
17_Summary	GO Biological Processes	GO:0034329	cell junction assembly	-7.46271	-4.72683	287,1004,1009,2017,2048,3691,3728,4131,4897,5318,7414,23136,55901,1500,8728,1829,288,140885,57664,283149	ANK2,CDH6,CDH11,CTTN,EPHB2,ITGB4,JUP,MAP1B,NRCAM,PKP2,VCL,EPB41L3,THSD1,CTNND1,ADAM19,DSG2,ANK3,SIRPA,PLEKHA4,BCL9L	20/-	TRUE	TRUE
17_Member	GO Biological Processes	GO:0034329	cell junction assembly	-7.46271	-4.72683	287,1004,1009,2017,2048,3691,3728,4131,4897,5318,7414,23136,55901	ANK2,CDH6,CDH11,CTTN,EPHB2,ITGB4,JUP,MAP1B,NRCAM,PKP2,VCL,EPB41L3,THSD1	13/302	TRUE	TRUE
17_Member	Reactome Gene Sets	R-HSA-9762292	Regulation of CDH11 function	-6.42096	-3.83523	1009,1500,3728,8728	CDH11,CTNND1,JUP,ADAM19	4/11	TRUE	TRUE
17_Member	GO Biological Processes	GO:0007043	cell-cell junction assembly	-5.97137	-3.47037	287,1004,1009,2048,3728,5318,7414,23136	ANK2,CDH6,CDH11,EPHB2,JUP,PKP2,VCL,EPB41L3	8/129	TRUE	TRUE
17_Member	GO Biological Processes	GO:0045216	cell-cell junction organization	-5.72706	-3.28266	287,1004,1009,1829,2048,3728,5318,7414,23136	ANK2,CDH6,CDH11,DSG2,EPHB2,JUP,PKP2,VCL,EPB41L3	9/187	TRUE	TRUE
17_Member	GO Biological Processes	GO:0150106	regulation of protein localization to cell-cell junction	-5.39504	-3.02983	1500,1829,7414	CTNND1,DSG2,VCL	3/6	TRUE	TRUE
17_Member	Reactome Gene Sets	R-HSA-9833576	CDH11 homotypic and heterotypic interactions	-5.1539	-2.83445	1009,1500,3728	CDH11,CTNND1,JUP	3/7	TRUE	TRUE
17_Member	Reactome Gene Sets	R-HSA-9759475	Regulation of CDH11 Expression and Function	-4.66243	-2.42516	1009,1500,3728,8728	CDH11,CTNND1,JUP,ADAM19	4/28	TRUE	TRUE
17_Member	GO Cellular Components	GO:0016342	catenin complex	-4.48184	-2.2954	1004,1009,1500,3728	CDH6,CDH11,CTNND1,JUP	4/31	TRUE	TRUE
17_Member	Reactome Gene Sets	R-HSA-9764260	Regulation of Expression and Function of Type II Classical Cadherins	-4.48184	-2.2954	1009,1500,3728,8728	CDH11,CTNND1,JUP,ADAM19	4/31	TRUE	TRUE
17_Member	Reactome Gene Sets	R-HSA-1500931	Cell-Cell communication	-3.7439	-1.73088	288,1004,1009,1500,3691,3728,7414,8728,140885	ANK3,CDH6,CDH11,CTNND1,ITGB4,JUP,VCL,ADAM19,SIRPA	9/334	TRUE	TRUE
17_Member	Reactome Gene Sets	R-HSA-446728	Cell junction organization	-3.37427	-1.43654	288,1004,1009,1500,3691,3728,7414,8728	ANK3,CDH6,CDH11,CTNND1,ITGB4,JUP,VCL,ADAM19	8/298	TRUE	TRUE
17_Member	GO Cellular Components	GO:0019897	extrinsic component of plasma membrane	-3.36671	-1.43494	1004,1009,1500,3728,57664	CDH6,CDH11,CTNND1,JUP,PLEKHA4	5/106	TRUE	TRUE
17_Member	Reactome Gene Sets	R-HSA-418990	Adherens junctions interactions	-3.22618	-1.31891	288,1004,1009,1500,3728,7414,8728	ANK3,CDH6,CDH11,CTNND1,JUP,VCL,ADAM19	7/240	TRUE	TRUE
17_Member	Reactome Gene Sets	R-HSA-421270	Cell-cell junction organization	-2.90944	-1.07665	288,1004,1009,1500,3728,7414,8728	ANK3,CDH6,CDH11,CTNND1,JUP,VCL,ADAM19	7/272	TRUE	FALSE
17_Member	Reactome Gene Sets	R-HSA-9759476	Regulation of Homotypic Cell-Cell Adhesion	-2.71831	-0.924979	288,1009,1500,3728,7414,8728	ANK3,CDH11,CTNND1,JUP,VCL,ADAM19	6/217	TRUE	FALSE
17_Member	GO Biological Processes	GO:0044331	cell-cell adhesion mediated by cadherin	-2.70415	-0.91759	1004,1009,1500	CDH6,CDH11,CTNND1	3/42	TRUE	FALSE
17_Member	GO Cellular Components	GO:0019898	extrinsic component of membrane	-2.47862	-0.72639	1004,1009,1500,3728,57664	CDH6,CDH11,CTNND1,JUP,PLEKHA4	5/168	TRUE	FALSE
17_Member	GO Molecular Functions	GO:0008013	beta-catenin binding	-2.40403	-0.667204	1004,1009,7414,283149	CDH6,CDH11,VCL,BCL9L	4/108	TRUE	FALSE
17_Member	GO Biological Processes	GO:0034332	adherens junction organization	-2.36961	-0.639891	1004,1009,7414	CDH6,CDH11,VCL	3/55	TRUE	FALSE
17_Member	Reactome Gene Sets	R-HSA-9764561	Regulation of CDH1 Function	-2.28398	-0.571088	1500,3728,7414	CTNND1,JUP,VCL	3/59	TRUE	FALSE
18_Summary	GO Biological Processes	GO:1904375	regulation of protein localization to cell periphery	-7.41414	-4.6876	1601,2037,2048,4035,4067,8673,23136,25921,26119,65266,288,2064,1072,1500,1829,3728,4130,7175,1759	DAB2,EPB41L2,EPHB2,LRP1,LYN,VAMP8,EPB41L3,ZDHHC5,LDLRAP1,WNK4,ANK3,ERBB2,CFL1,CTNND1,DSG2,JUP,MAP1A,TPR,DNM1	19/-	TRUE	TRUE
18_Member	GO Biological Processes	GO:1904375	regulation of protein localization to cell periphery	-7.41414	-4.6876	1601,2037,2048,4035,4067,8673,23136,25921,26119,65266	DAB2,EPB41L2,EPHB2,LRP1,LYN,VAMP8,EPB41L3,ZDHHC5,LDLRAP1,WNK4	10/158	TRUE	TRUE
18_Member	GO Biological Processes	GO:1905475	regulation of protein localization to membrane	-7.38225	-4.66486	288,1601,2048,2064,4035,4067,8673,23136,25921,26119,65266	ANK3,DAB2,EPHB2,ERBB2,LRP1,LYN,VAMP8,EPB41L3,ZDHHC5,LDLRAP1,WNK4	11/204	TRUE	TRUE
18_Member	GO Biological Processes	GO:1903076	regulation of protein localization to plasma membrane	-6.18286	-3.62308	1601,2048,4035,4067,8673,25921,26119,65266	DAB2,EPHB2,LRP1,LYN,VAMP8,ZDHHC5,LDLRAP1,WNK4	8/121	TRUE	TRUE
18_Member	GO Biological Processes	GO:1903829	positive regulation of protein localization	-4.81332	-2.54281	288,1072,1500,1829,2037,2048,2064,3728,4035,4067,4130,7175,25921	ANK3,CFL1,CTNND1,DSG2,EPB41L2,EPHB2,ERBB2,JUP,LRP1,LYN,MAP1A,TPR,ZDHHC5	13/522	TRUE	TRUE
18_Member	GO Biological Processes	GO:1905477	positive regulation of protein localization to membrane	-4.22777	-2.09865	288,2048,2064,4035,4067,25921	ANK3,EPHB2,ERBB2,LRP1,LYN,ZDHHC5	6/113	TRUE	TRUE
18_Member	GO Biological Processes	GO:1904377	positive regulation of protein localization to cell periphery	-3.93783	-1.89138	2037,2048,4035,4067,25921	EPB41L2,EPHB2,LRP1,LYN,ZDHHC5	5/80	TRUE	TRUE
18_Member	GO Biological Processes	GO:1903078	positive regulation of protein localization to plasma membrane	-3.14285	-1.25876	2048,4035,4067,25921	EPHB2,LRP1,LYN,ZDHHC5	4/68	TRUE	FALSE
18_Member	Reactome Gene Sets	R-HSA-3928662	EPHB-mediated forward signaling	-2.70415	-0.91759	1072,2048,4067	CFL1,EPHB2,LYN	3/42	TRUE	FALSE
18_Member	Reactome Gene Sets	R-HSA-2682334	EPH-Ephrin signaling	-2.67248	-0.888745	1072,1759,2048,4067	CFL1,DNM1,EPHB2,LYN	4/91	TRUE	FALSE
18_Member	GO Biological Processes	GO:0018108	peptidyl-tyrosine phosphorylation	-2.46241	-0.71699	2048,2064,4067	EPHB2,ERBB2,LYN	3/51	TRUE	FALSE
18_Member	Reactome Gene Sets	R-HSA-3928665	EPH-ephrin mediated repulsion of cells	-2.46241	-0.71699	1759,2048,4067	DNM1,EPHB2,LYN	3/51	TRUE	FALSE
18_Member	GO Biological Processes	GO:0018212	peptidyl-tyrosine modification	-2.43848	-0.695944	2048,2064,4067	EPHB2,ERBB2,LYN	3/52	TRUE	FALSE
19_Summary	GO Cellular Components	GO:0030027	lamellipodium	-7.27475	-4.56631	1072,2017,2319,3685,4638,6548,8476,23022,55740,55785,65979,3691,7414,22800,1756,63895,150696	CFL1,CTTN,FLOT2,ITGAV,MYLK,SLC9A1,CDC42BPA,PALLD,ENAH,FGD6,PHACTR4,ITGB4,VCL,RRAS2,DMD,PIEZO2,PROM2	17/-	TRUE	TRUE
19_Member	GO Cellular Components	GO:0030027	lamellipodium	-7.27475	-4.56631	1072,2017,2319,3685,4638,6548,8476,23022,55740,55785,65979	CFL1,CTTN,FLOT2,ITGAV,MYLK,SLC9A1,CDC42BPA,PALLD,ENAH,FGD6,PHACTR4	11/209	TRUE	TRUE
19_Member	KEGG Pathway	hsa04810	Regulation of actin cytoskeleton	-4.113	-2.02186	1072,3685,3691,4638,6548,7414,22800,55740	CFL1,ITGAV,ITGB4,MYLK,SLC9A1,VCL,RRAS2,ENAH	8/232	TRUE	TRUE
19_Member	GO Cellular Components	GO:0098858	actin-based cell projection	-2.58288	-0.811609	1072,1756,3685,55740,63895,150696	CFL1,DMD,ITGAV,ENAH,PIEZO2,PROM2	6/231	TRUE	FALSE
19_Member	GO Cellular Components	GO:0030175	filopodium	-2.44773	-0.704236	1072,1756,3685,55740	CFL1,DMD,ITGAV,ENAH	4/105	TRUE	FALSE
20_Summary	GO Biological Processes	GO:0045785	positive regulation of cell adhesion	-7.10441	-4.41335	288,1072,1601,1829,2064,2319,3685,3728,4067,7168,8728,23376,29126,57669,80005,140885,4155,2048	ANK3,CFL1,DAB2,DSG2,ERBB2,FLOT2,ITGAV,JUP,LYN,TPM1,ADAM19,UFL1,CD274,EPB41L5,DOCK5,SIRPA,MBP,EPHB2	18/-	TRUE	TRUE
20_Member	GO Biological Processes	GO:0045785	positive regulation of cell adhesion	-7.10441	-4.41335	288,1072,1601,1829,2064,2319,3685,3728,4067,7168,8728,23376,29126,57669,80005,140885	ANK3,CFL1,DAB2,DSG2,ERBB2,FLOT2,ITGAV,JUP,LYN,TPM1,ADAM19,UFL1,CD274,EPB41L5,DOCK5,SIRPA	16/513	TRUE	TRUE
20_Member	GO Biological Processes	GO:0022407	regulation of cell-cell adhesion	-2.92953	-1.0908	288,2064,2319,4067,4155,8728,23376,29126,57669,140885	ANK3,ERBB2,FLOT2,LYN,MBP,ADAM19,UFL1,CD274,EPB41L5,SIRPA	10/523	TRUE	FALSE
20_Member	GO Biological Processes	GO:0007162	negative regulation of cell adhesion	-2.46816	-0.71699	1072,2048,2064,4155,23376,29126,57669	CFL1,EPHB2,ERBB2,MBP,UFL1,CD274,EPB41L5	7/326	TRUE	FALSE
20_Member	GO Biological Processes	GO:0022409	positive regulation of cell-cell adhesion	-2.34828	-0.62604	288,2319,4067,8728,23376,29126,140885	ANK3,FLOT2,LYN,ADAM19,UFL1,CD274,SIRPA	7/343	TRUE	FALSE

## Sheet: Downregulated
GroupID	Category	Term	Description	LogP	Log(q-value)	Genes	Symbols	InTerm_InList	≥ 3 Unambiguously mapped proteins	Q-value < 0.05
1_Summary	GO Biological Processes	GO:0051276	chromosome organization	-19.1553	-14.7567	699,983,1017,1060,1063,2177,3006,3008,3009,3020,3021,5925,5981,6672,7153,7515,8350,8971,9232,9493,10403,10744,24137,55143,55183,56992,57122,81550,83540,4926,5108,5116,8290,9883,10142,51512,91754,95681,140609,333932,63967,84126,648,1018,5339,6660,10713,10982,11113,54443,54478,157313,1981,4288,6597,9031,10432,25959,55968,56852,91147,255374,284403,1909,79080,3178,5253,4221,9659,11252,55791,64787,103…	BUB1,CDK1,CDK2,CENPC,CENPF,FANCD2,H1-2,H1-4,H1-5,H3-3A,H3-3B,RB1,RFC1,SP100,TOP2A,XRCC1,H3C1,H1-10,PTTG1,KIF23,NDC80,PTTG2,KIF4A,CDCA8,RIF1,KIF15,NUP107,TDRD3,NUF2,NUMA1,PCM1,PCNT,H3-4,POM121,AKAP9,GTSE1,NEK9,CEP41,NEK7,H3C15,CLSPN,ATRIP,BMI1,CDK3,PLEC,SOX5,USP39,MAPRE2,CIT,ANLN,PIMREG,CDCA2,EIF4G1,MKI67,SMARCA4,BAZ1B,RBM14,KANK2,NSFL1C,RAD18,TMEM67,MBLAC1,WDR62,EDNRA,CCDC86,HNRNPA1,PHF2,MEN1,PDE…	84/-	TRUE	TRUE
1_Member	GO Biological Processes	GO:0051276	chromosome organization	-19.1553	-14.7567	699,983,1017,1060,1063,2177,3006,3008,3009,3020,3021,5925,5981,6672,7153,7515,8350,8971,9232,9493,10403,10744,24137,55143,55183,56992,57122,81550,83540	BUB1,CDK1,CDK2,CENPC,CENPF,FANCD2,H1-2,H1-4,H1-5,H3-3A,H3-3B,RB1,RFC1,SP100,TOP2A,XRCC1,H3C1,H1-10,PTTG1,KIF23,NDC80,PTTG2,KIF4A,CDCA8,RIF1,KIF15,NUP107,TDRD3,NUF2	29/453	TRUE	TRUE
1_Member	Reactome Gene Sets	R-HSA-69278	Cell Cycle, Mitotic	-15.8318	-11.7342	699,983,1017,1060,1063,3020,3021,4926,5108,5116,5925,5981,7153,8290,8350,9232,9493,9883,10142,10403,51512,55143,57122,83540,91754,95681,140609,333932	BUB1,CDK1,CDK2,CENPC,CENPF,H3-3A,H3-3B,NUMA1,PCM1,PCNT,RB1,RFC1,TOP2A,H3-4,H3C1,PTTG1,KIF23,POM121,AKAP9,NDC80,GTSE1,CDCA8,NUP107,NUF2,NEK9,CEP41,NEK7,H3C15	28/554	TRUE	TRUE
1_Member	Reactome Gene Sets	R-HSA-1640170	Cell Cycle	-15.2896	-11.3681	699,983,1017,1060,1063,3020,3021,4926,5108,5116,5925,5981,7153,8290,8350,9232,9493,9883,10142,10403,51512,55143,57122,63967,83540,84126,91754,95681,140609,333932	BUB1,CDK1,CDK2,CENPC,CENPF,H3-3A,H3-3B,NUMA1,PCM1,PCNT,RB1,RFC1,TOP2A,H3-4,H3C1,PTTG1,KIF23,POM121,AKAP9,NDC80,GTSE1,CDCA8,NUP107,CLSPN,NUF2,ATRIP,NEK9,CEP41,NEK7,H3C15	30/684	TRUE	TRUE
1_Member	Reactome Gene Sets	R-HSA-68886	M Phase	-15.1057	-11.3091	699,983,1060,1063,3020,3021,4926,5108,5116,5925,8290,8350,9232,9493,9883,10142,10403,55143,57122,83540,91754,95681,140609,333932	BUB1,CDK1,CENPC,CENPF,H3-3A,H3-3B,NUMA1,PCM1,PCNT,RB1,H3-4,H3C1,PTTG1,KIF23,POM121,AKAP9,NDC80,CDCA8,NUP107,NUF2,NEK9,CEP41,NEK7,H3C15	24/406	TRUE	TRUE
1_Member	GO Biological Processes	GO:0051301	cell division	-14.4274	-10.7277	648,699,983,1017,1018,1060,1063,4926,5339,5925,6660,7153,8290,9232,9493,10403,10713,10982,11113,24137,54443,54478,55143,83540,91754,157313	BMI1,BUB1,CDK1,CDK2,CDK3,CENPC,CENPF,NUMA1,PLEC,RB1,SOX5,TOP2A,H3-4,PTTG1,KIF23,NDC80,USP39,MAPRE2,CIT,KIF4A,ANLN,PIMREG,CDCA8,NUF2,NEK9,CDCA2	26/529	TRUE	TRUE
1_Member	GO Biological Processes	GO:0010564	regulation of cell cycle process	-12.2157	-8.77128	699,983,1017,1018,1063,1981,2177,4288,4926,5925,6597,9031,9493,10403,10432,11113,25959,54443,55143,55968,56852,63967,83540,84126,91147,157313,255374,284403	BUB1,CDK1,CDK2,CDK3,CENPF,EIF4G1,FANCD2,MKI67,NUMA1,RB1,SMARCA4,BAZ1B,KIF23,NDC80,RBM14,CIT,KANK2,ANLN,CDCA8,NSFL1C,RAD18,CLSPN,NUF2,ATRIP,TMEM67,CDCA2,MBLAC1,WDR62	28/775	TRUE	TRUE
1_Member	GO Biological Processes	GO:0000278	mitotic cell cycle	-11.4574	-8.05877	699,983,1017,1018,1060,1063,1909,2177,4926,5116,5925,9493,10403,11113,24137,54443,55143,55968,56992,63967,79080,83540,91754,284403	BUB1,CDK1,CDK2,CDK3,CENPC,CENPF,EDNRA,FANCD2,NUMA1,PCNT,RB1,KIF23,NDC80,CIT,KIF4A,ANLN,CDCA8,NSFL1C,KIF15,CLSPN,CCDC86,NUF2,NEK9,WDR62	24/598	TRUE	TRUE
1_Member	GO Biological Processes	GO:1903047	mitotic cell cycle process	-11.0073	-7.65004	699,983,1017,1018,1060,1063,2177,4926,5116,5925,9493,10403,11113,24137,54443,55143,55968,56992,63967,79080,83540,284403	BUB1,CDK1,CDK2,CDK3,CENPC,CENPF,FANCD2,NUMA1,PCNT,RB1,KIF23,NDC80,CIT,KIF4A,ANLN,CDCA8,NSFL1C,KIF15,CLSPN,CCDC86,NUF2,WDR62	22/518	TRUE	TRUE
1_Member	GO Biological Processes	GO:0033044	regulation of chromosome organization	-10.8858	-7.59956	699,983,1017,1063,3020,3021,3178,4926,5925,6597,7515,9031,10403,55143,83540,140609	BUB1,CDK1,CDK2,CENPF,H3-3A,H3-3B,HNRNPA1,NUMA1,RB1,SMARCA4,XRCC1,BAZ1B,NDC80,CDCA8,NUF2,NEK7	16/244	TRUE	TRUE
1_Member	Reactome Gene Sets	R-HSA-68877	Mitotic Prometaphase	-10.8842	-7.59956	699,983,1060,1063,4926,5108,5116,10142,10403,55143,57122,83540,91754,95681,140609	BUB1,CDK1,CENPC,CENPF,NUMA1,PCM1,PCNT,AKAP9,NDC80,CDCA8,NUP107,NUF2,NEK9,CEP41,NEK7	15/206	TRUE	TRUE
1_Member	GO Cellular Components	GO:0000793	condensed chromosome	-10.809	-7.55645	699,1017,1060,1063,2177,3020,3021,4288,5253,6597,7153,8290,9031,10403,55183,57122,83540	BUB1,CDK2,CENPC,CENPF,FANCD2,H3-3A,H3-3B,MKI67,PHF2,SMARCA4,TOP2A,H3-4,BAZ1B,NDC80,RIF1,NUP107,NUF2	17/288	TRUE	TRUE
1_Member	GO Biological Processes	GO:0007346	regulation of mitotic cell cycle	-9.19076	-6.07088	699,983,1017,1018,1063,1981,2177,4288,5925,6597,10403,25959,54443,55143,63967,83540,91754,140609,157313,255374	BUB1,CDK1,CDK2,CDK3,CENPF,EIF4G1,FANCD2,MKI67,RB1,SMARCA4,NDC80,KANK2,ANLN,CDCA8,CLSPN,NUF2,NEK9,NEK7,CDCA2,MBLAC1	20/527	TRUE	TRUE
1_Member	GO Biological Processes	GO:2001251	negative regulation of chromosome organization	-8.41099	-5.41029	699,1063,3020,3021,3178,7515,9031,10403,83540	BUB1,CENPF,H3-3A,H3-3B,HNRNPA1,XRCC1,BAZ1B,NDC80,NUF2	9/80	TRUE	TRUE
1_Member	GO Biological Processes	GO:0010948	negative regulation of cell cycle process	-7.81735	-4.89584	699,983,1017,1063,2177,5925,9031,10403,10432,25959,63967,83540,84126,91147	BUB1,CDK1,CDK2,CENPF,FANCD2,RB1,BAZ1B,NDC80,RBM14,KANK2,CLSPN,NUF2,ATRIP,TMEM67	14/293	TRUE	TRUE
1_Member	GO Biological Processes	GO:1901987	regulation of cell cycle phase transition	-7.60546	-4.719	699,983,1017,1018,1063,1981,2177,5925,6597,10403,25959,54443,55143,63967,83540,84126,255374	BUB1,CDK1,CDK2,CDK3,CENPF,EIF4G1,FANCD2,RB1,SMARCA4,NDC80,KANK2,ANLN,CDCA8,CLSPN,NUF2,ATRIP,MBLAC1	17/468	TRUE	TRUE
1_Member	GO Biological Processes	GO:1901990	regulation of mitotic cell cycle phase transition	-7.59319	-4.719	699,983,1017,1018,1063,1981,5925,6597,10403,25959,54443,55143,63967,83540,255374	BUB1,CDK1,CDK2,CDK3,CENPF,EIF4G1,RB1,SMARCA4,NDC80,KANK2,ANLN,CDCA8,CLSPN,NUF2,MBLAC1	15/357	TRUE	TRUE
1_Member	GO Biological Processes	GO:0051983	regulation of chromosome segregation	-7.53866	-4.6841	699,983,1063,4926,5925,6597,10403,55143,56852,83540	BUB1,CDK1,CENPF,NUMA1,RB1,SMARCA4,NDC80,CDCA8,RAD18,NUF2	10/134	TRUE	TRUE
1_Member	GO Cellular Components	GO:0000775	chromosome, centromeric region	-7.39298	-4.56254	699,1060,1063,3020,3021,5253,6597,7153,9031,10403,55143,57122,83540	BUB1,CENPC,CENPF,H3-3A,H3-3B,PHF2,SMARCA4,TOP2A,BAZ1B,NDC80,CDCA8,NUP107,NUF2	13/267	TRUE	TRUE
1_Member	GO Biological Processes	GO:0045786	negative regulation of cell cycle	-7.31273	-4.51615	699,983,1017,1063,2177,4221,5925,9031,10403,10432,25959,63967,83540,84126,91147	BUB1,CDK1,CDK2,CENPF,FANCD2,MEN1,RB1,BAZ1B,NDC80,RBM14,KANK2,CLSPN,NUF2,ATRIP,TMEM67	15/375	TRUE	TRUE
1_Member	GO Biological Processes	GO:0033045	regulation of sister chromatid segregation	-7.29019	-4.50434	699,983,1063,4926,5925,6597,10403,55143,83540	BUB1,CDK1,CENPF,NUMA1,RB1,SMARCA4,NDC80,CDCA8,NUF2	9/107	TRUE	TRUE
1_Member	GO Cellular Components	GO:0005813	centrosome	-7.1511	-4.37571	983,1017,1063,4926,5108,5116,9493,9659,10142,10403,11252,55791,55968,56852,56992,64787,91147,91754,95681,140609,284403	CDK1,CDK2,CENPF,NUMA1,PCM1,PCNT,KIF23,PDE4DIP,AKAP9,NDC80,PACSIN2,LRIF1,NSFL1C,RAD18,KIF15,EPS8L2,TMEM67,NEK9,CEP41,NEK7,WDR62	21/767	TRUE	TRUE
1_Member	Reactome Gene Sets	R-HSA-69620	Cell Cycle Checkpoints	-7.06259	-4.33605	699,983,1017,1060,1063,8290,10403,51512,55143,57122,63967,83540,84126	BUB1,CDK1,CDK2,CENPC,CENPF,H3-4,NDC80,GTSE1,CDCA8,NUP107,CLSPN,NUF2,ATRIP	13/285	TRUE	TRUE
1_Member	GO Biological Processes	GO:0010639	negative regulation of organelle organization	-6.93674	-4.22195	699,1063,3020,3021,3178,7515,9031,10391,10403,10432,25959,54434,83540,91147	BUB1,CENPF,H3-3A,H3-3B,HNRNPA1,XRCC1,BAZ1B,CORO2B,NDC80,RBM14,KANK2,SSH1,NUF2,TMEM67	14/345	TRUE	TRUE
1_Member	GO Biological Processes	GO:0033047	regulation of mitotic sister chromatid segregation	-6.92863	-4.22195	699,983,1063,4926,10403,55143,83540	BUB1,CDK1,CENPF,NUMA1,NDC80,CDCA8,NUF2	7/57	TRUE	TRUE
1_Member	Reactome Gene Sets	R-HSA-9648025	EML4 and NUDC in mitotic spindle formation	-6.8896	-4.19853	699,1060,1063,10403,55143,57122,83540,91754,140609	BUB1,CENPC,CENPF,NDC80,CDCA8,NUP107,NUF2,NEK9,NEK7	9/119	TRUE	TRUE
1_Member	GO Cellular Components	GO:0000776	kinetochore	-6.44806	-3.83475	699,1060,1063,3020,3021,5253,6597,10403,57122,83540	BUB1,CENPC,CENPF,H3-3A,H3-3B,PHF2,SMARCA4,NDC80,NUP107,NUF2	10/175	TRUE	TRUE
1_Member	Reactome Gene Sets	R-HSA-194315	Signaling by Rho GTPases	-6.43804	-3.83179	613,699,1060,1063,3020,3021,4221,8350,10403,11113,26286,54443,55143,55968,57122,57473,58504,83540,333932	BCR,BUB1,CENPC,CENPF,H3-3A,H3-3B,MEN1,H3C1,NDC80,CIT,ARFGAP3,ANLN,CDCA8,NSFL1C,NUP107,ZNF512B,ARHGAP22,NUF2,H3C15	19/702	TRUE	TRUE
1_Member	Reactome Gene Sets	R-HSA-195258	RHO GTPase Effectors	-6.3936	-3.79431	699,1060,1063,3020,3021,4221,8350,10403,11113,55143,57122,83540,333932	BUB1,CENPC,CENPF,H3-3A,H3-3B,MEN1,H3C1,NDC80,CIT,CDCA8,NUP107,NUF2,H3C15	13/326	TRUE	TRUE
1_Member	Reactome Gene Sets	R-HSA-9716542	Signaling by Rho GTPases, Miro GTPases and RHOBTB3	-6.2908	-3.71013	613,699,1060,1063,3020,3021,4221,8350,10403,11113,26286,54443,55143,55968,57122,57473,58504,83540,333932	BCR,BUB1,CENPC,CENPF,H3-3A,H3-3B,MEN1,H3C1,NDC80,CIT,ARFGAP3,ANLN,CDCA8,NSFL1C,NUP107,ZNF512B,ARHGAP22,NUF2,H3C15	19/718	TRUE	TRUE
1_Member	GO Cellular Components	GO:0000779	condensed chromosome, centromeric region	-6.18313	-3.6251	699,1060,1063,3020,3021,5253,6597,10403,57122,83540	BUB1,CENPC,CENPF,H3-3A,H3-3B,PHF2,SMARCA4,NDC80,NUP107,NUF2	10/187	TRUE	TRUE
1_Member	GO Biological Processes	GO:0051129	negative regulation of cellular component organization	-6.09519	-3.55389	302,699,1063,3020,3021,3178,5253,7515,9031,10391,10403,10432,11252,25959,54434,55604,83540,91147,253725	ANXA2,BUB1,CENPF,H3-3A,H3-3B,HNRNPA1,PHF2,XRCC1,BAZ1B,CORO2B,NDC80,RBM14,PACSIN2,KANK2,SSH1,CARMIL1,NUF2,TMEM67,WASHC2C	19/740	TRUE	TRUE
1_Member	GO Biological Processes	GO:1905818	regulation of chromosome separation	-6.05842	-3.52902	699,1063,4926,5925,10403,55143,83540	BUB1,CENPF,NUMA1,RB1,NDC80,CDCA8,NUF2	7/76	TRUE	TRUE
1_Member	GO Biological Processes	GO:1901988	negative regulation of cell cycle phase transition	-6.02736	-3.50379	699,983,1017,1063,2177,5925,10403,25959,63967,83540,84126	BUB1,CDK1,CDK2,CENPF,FANCD2,RB1,NDC80,KANK2,CLSPN,NUF2,ATRIP	11/243	TRUE	TRUE
1_Member	GO Biological Processes	GO:0000075	cell cycle checkpoint signaling	-5.91578	-3.40632	699,983,1017,1063,2177,10403,63967,83540,84126	BUB1,CDK1,CDK2,CENPF,FANCD2,NDC80,CLSPN,NUF2,ATRIP	9/155	TRUE	TRUE
1_Member	GO Biological Processes	GO:0007093	mitotic cell cycle checkpoint signaling	-5.85063	-3.35509	699,983,1017,1063,2177,10403,63967,83540	BUB1,CDK1,CDK2,CENPF,FANCD2,NDC80,CLSPN,NUF2	8/117	TRUE	TRUE
1_Member	GO Biological Processes	GO:0007088	regulation of mitotic nuclear division	-5.79494	-3.30479	699,1063,4288,5925,10403,55143,83540,157313	BUB1,CENPF,MKI67,RB1,NDC80,CDCA8,NUF2,CDCA2	8/119	TRUE	TRUE
1_Member	Reactome Gene Sets	R-HSA-2500257	Resolution of Sister Chromatid Cohesion	-5.53143	-3.0673	699,983,1060,1063,10403,55143,57122,83540	BUB1,CDK1,CENPC,CENPF,NDC80,CDCA8,NUP107,NUF2	8/129	TRUE	TRUE
1_Member	GO Biological Processes	GO:0030071	regulation of mitotic metaphase/anaphase transition	-5.49531	-3.0362	699,1063,5925,6597,10403,55143,83540	BUB1,CENPF,RB1,SMARCA4,NDC80,CDCA8,NUF2	7/92	TRUE	TRUE
1_Member	Reactome Gene Sets	R-HSA-68882	Mitotic Anaphase	-5.45812	-3.00761	699,983,1060,1063,9232,9883,10403,55143,57122,83540	BUB1,CDK1,CENPC,CENPF,PTTG1,POM121,NDC80,CDCA8,NUP107,NUF2	10/225	TRUE	TRUE
1_Member	GO Biological Processes	GO:0045930	negative regulation of mitotic cell cycle	-5.441	-3.00482	699,983,1017,1063,2177,5925,10403,25959,63967,83540	BUB1,CDK1,CDK2,CENPF,FANCD2,RB1,NDC80,KANK2,CLSPN,NUF2	10/226	TRUE	TRUE
1_Member	Reactome Gene Sets	R-HSA-2555396	Mitotic Metaphase and Anaphase	-5.441	-3.00482	699,983,1060,1063,9232,9883,10403,55143,57122,83540	BUB1,CDK1,CENPC,CENPF,PTTG1,POM121,NDC80,CDCA8,NUP107,NUF2	10/226	TRUE	TRUE
1_Member	GO Biological Processes	GO:1901991	negative regulation of mitotic cell cycle phase transition	-5.43964	-3.00482	699,983,1017,1063,5925,10403,25959,63967,83540	BUB1,CDK1,CDK2,CENPF,RB1,NDC80,KANK2,CLSPN,NUF2	9/177	TRUE	TRUE
1_Member	GO Biological Processes	GO:0010965	regulation of mitotic sister chromatid separation	-5.43497	-3.00482	699,1063,5925,10403,55143,83540	BUB1,CENPF,RB1,NDC80,CDCA8,NUF2	6/61	TRUE	TRUE
1_Member	GO Biological Processes	GO:1902099	regulation of metaphase/anaphase transition of cell cycle	-5.40192	-2.98556	699,1063,5925,6597,10403,55143,83540	BUB1,CENPF,RB1,SMARCA4,NDC80,CDCA8,NUF2	7/95	TRUE	TRUE
1_Member	Reactome Gene Sets	R-HSA-141424	Amplification of signal from the kinetochores	-5.37152	-2.96411	699,1060,1063,10403,55143,57122,83540	BUB1,CENPC,CENPF,NDC80,CDCA8,NUP107,NUF2	7/96	TRUE	TRUE
1_Member	Reactome Gene Sets	R-HSA-141444	Amplification of signal from unattached kinetochores via a MAD2 inhibitory signal	-5.37152	-2.96411	699,1060,1063,10403,55143,57122,83540	BUB1,CENPC,CENPF,NDC80,CDCA8,NUP107,NUF2	7/96	TRUE	TRUE
1_Member	GO Biological Processes	GO:0051383	kinetochore organization	-5.23456	-2.85711	1060,1063,10403,83540	CENPC,CENPF,NDC80,NUF2	4/18	TRUE	TRUE
1_Member	GO Biological Processes	GO:0051783	regulation of nuclear division	-5.11076	-2.74955	699,1063,4288,5925,10403,55143,83540,157313	BUB1,CENPF,MKI67,RB1,NDC80,CDCA8,NUF2,CDCA2	8/147	TRUE	TRUE
1_Member	GO Cellular Components	GO:0000940	outer kinetochore	-5.0396	-2.68629	699,1063,10403,83540	BUB1,CENPF,NDC80,NUF2	4/20	TRUE	TRUE
1_Member	Reactome Gene Sets	R-HSA-69618	Mitotic Spindle Checkpoint	-4.90311	-2.58002	699,1060,1063,10403,55143,57122,83540	BUB1,CENPC,CENPF,NDC80,CDCA8,NUP107,NUF2	7/113	TRUE	TRUE
1_Member	GO Biological Processes	GO:0051310	metaphase chromosome alignment	-4.53967	-2.29637	1060,1063,5925,10403,55143,83540	CENPC,CENPF,RB1,NDC80,CDCA8,NUF2	6/87	TRUE	TRUE
1_Member	GO Biological Processes	GO:0051640	organelle localization	-4.52419	-2.28392	372,1060,1063,4926,5108,5925,8943,10142,10403,26286,55143,55773,55968,83540	ARCN1,CENPC,CENPF,NUMA1,PCM1,RB1,AP3D1,AKAP9,NDC80,ARFGAP3,CDCA8,TBC1D23,NSFL1C,NUF2	14/557	TRUE	TRUE
1_Member	Reactome Gene Sets	R-HSA-2467813	Separation of Sister Chromatids	-4.47409	-2.24571	699,1060,1063,9232,10403,55143,57122,83540	BUB1,CENPC,CENPF,PTTG1,NDC80,CDCA8,NUP107,NUF2	8/180	TRUE	TRUE
1_Member	GO Biological Processes	GO:0051656	establishment of organelle localization	-4.38421	-2.17309	1060,1063,4926,5108,5925,8943,10403,26286,55143,55773,55968,83540	CENPC,CENPF,NUMA1,PCM1,RB1,AP3D1,NDC80,ARFGAP3,CDCA8,TBC1D23,NSFL1C,NUF2	12/430	TRUE	TRUE
1_Member	GO Biological Processes	GO:0007094	mitotic spindle assembly checkpoint signaling	-4.31013	-2.13421	699,1063,10403,83540	BUB1,CENPF,NDC80,NUF2	4/30	TRUE	TRUE
1_Member	GO Biological Processes	GO:0071173	spindle assembly checkpoint signaling	-4.31013	-2.13421	699,1063,10403,83540	BUB1,CENPF,NDC80,NUF2	4/30	TRUE	TRUE
1_Member	GO Biological Processes	GO:0071174	mitotic spindle checkpoint signaling	-4.31013	-2.13421	699,1063,10403,83540	BUB1,CENPF,NDC80,NUF2	4/30	TRUE	TRUE
1_Member	Reactome Gene Sets	R-HSA-5663220	RHO GTPases Activate Formins	-4.26335	-2.10025	699,1060,1063,10403,55143,57122,83540	BUB1,CENPC,CENPF,NDC80,CDCA8,NUP107,NUF2	7/142	TRUE	TRUE
1_Member	GO Biological Processes	GO:0031577	spindle checkpoint signaling	-4.25244	-2.09435	699,1063,10403,83540	BUB1,CENPF,NDC80,NUF2	4/31	TRUE	TRUE
1_Member	GO Biological Processes	GO:0051303	establishment of chromosome localization	-4.19832	-2.04766	1060,1063,5925,10403,55143,83540	CENPC,CENPF,RB1,NDC80,CDCA8,NUF2	6/100	TRUE	TRUE
1_Member	GO Biological Processes	GO:0033046	negative regulation of sister chromatid segregation	-4.14294	-2.01614	699,1063,10403,83540	BUB1,CENPF,NDC80,NUF2	4/33	TRUE	TRUE
1_Member	GO Biological Processes	GO:0033048	negative regulation of mitotic sister chromatid segregation	-4.14294	-2.01614	699,1063,10403,83540	BUB1,CENPF,NDC80,NUF2	4/33	TRUE	TRUE
1_Member	GO Biological Processes	GO:0045841	negative regulation of mitotic metaphase/anaphase transition	-4.14294	-2.01614	699,1063,10403,83540	BUB1,CENPF,NDC80,NUF2	4/33	TRUE	TRUE
1_Member	GO Biological Processes	GO:2000816	negative regulation of mitotic sister chromatid separation	-4.14294	-2.01614	699,1063,10403,83540	BUB1,CENPF,NDC80,NUF2	4/33	TRUE	TRUE
1_Member	GO Biological Processes	GO:1902100	negative regulation of metaphase/anaphase transition of cell cycle	-4.04048	-1.94719	699,1063,10403,83540	BUB1,CENPF,NDC80,NUF2	4/35	TRUE	TRUE
1_Member	GO Biological Processes	GO:1905819	negative regulation of chromosome separation	-4.04048	-1.94719	699,1063,10403,83540	BUB1,CENPF,NDC80,NUF2	4/35	TRUE	TRUE
1_Member	GO Biological Processes	GO:0050000	chromosome localization	-4.01225	-1.92325	1060,1063,5925,10403,55143,83540	CENPC,CENPF,RB1,NDC80,CDCA8,NUF2	6/108	TRUE	TRUE
1_Member	GO Biological Processes	GO:0008608	attachment of spindle microtubules to kinetochore	-3.99163	-1.91447	1060,5925,10403,83540	CENPC,RB1,NDC80,NUF2	4/36	TRUE	TRUE
1_Member	GO Biological Processes	GO:0051985	negative regulation of chromosome segregation	-3.99163	-1.91447	699,1063,10403,83540	BUB1,CENPF,NDC80,NUF2	4/36	TRUE	TRUE
1_Member	GO Biological Processes	GO:0045839	negative regulation of mitotic nuclear division	-3.81008	-1.78066	699,1063,10403,83540	BUB1,CENPF,NDC80,NUF2	4/40	TRUE	TRUE
1_Member	GO Biological Processes	GO:0051784	negative regulation of nuclear division	-3.53575	-1.562	699,1063,10403,83540	BUB1,CENPF,NDC80,NUF2	4/47	TRUE	TRUE
1_Member	GO Biological Processes	GO:0051315	attachment of mitotic spindle microtubules to kinetochore	-3.49283	-1.52556	1060,10403,83540	CENPC,NDC80,NUF2	3/20	TRUE	TRUE
1_Member	GO Biological Processes	GO:0007080	mitotic metaphase chromosome alignment	-3.15645	-1.25613	1060,10403,55143,83540	CENPC,NDC80,CDCA8,NUF2	4/59	TRUE	FALSE
2_Summary	GO Cellular Components	GO:0098687	chromosomal region	-13.9367	-10.3162	699,983,1017,1060,1063,3020,3021,4221,5253,6597,6672,6741,7153,7515,8290,9031,10403,23064,55143,55183,55791,57122,83540,648,2091,3006,3008,3009,5925,8350,8971,9320,9557,10432,10927,55870,56916,84656,333932	BUB1,CDK1,CDK2,CENPC,CENPF,H3-3A,H3-3B,MEN1,PHF2,SMARCA4,SP100,SSB,TOP2A,XRCC1,H3-4,BAZ1B,NDC80,SETX,CDCA8,RIF1,LRIF1,NUP107,NUF2,BMI1,FBL,H1-2,H1-4,H1-5,RB1,H3C1,H1-10,TRIP12,CHD1L,RBM14,SPIN1,ASH1L,SMARCAD1,GLYR1,H3C15	39/-	TRUE	TRUE
2_Member	GO Cellular Components	GO:0098687	chromosomal region	-13.9367	-10.3162	699,983,1017,1060,1063,3020,3021,4221,5253,6597,6672,6741,7153,7515,8290,9031,10403,23064,55143,55183,55791,57122,83540	BUB1,CDK1,CDK2,CENPC,CENPF,H3-3A,H3-3B,MEN1,PHF2,SMARCA4,SP100,SSB,TOP2A,XRCC1,H3-4,BAZ1B,NDC80,SETX,CDCA8,RIF1,LRIF1,NUP107,NUF2	23/413	TRUE	TRUE
2_Member	GO Biological Processes	GO:0006338	chromatin remodeling	-13.2887	-9.79311	648,699,983,1017,2091,3006,3008,3009,3020,3021,4221,5253,5925,6597,8290,8350,8971,9031,9320,9557,10432,10927,55183,55791,55870,56916,84656,333932	BMI1,BUB1,CDK1,CDK2,FBL,H1-2,H1-4,H1-5,H3-3A,H3-3B,MEN1,PHF2,RB1,SMARCA4,H3-4,H3C1,H1-10,BAZ1B,TRIP12,CHD1L,RBM14,SPIN1,RIF1,LRIF1,ASH1L,SMARCAD1,GLYR1,H3C15	28/700	TRUE	TRUE
2_Member	GO Biological Processes	GO:0040029	epigenetic regulation of gene expression	-9.36498	-6.19679	648,3006,3020,3021,4221,5253,5925,6597,8350,9320,10432,10927,55183,55791,56916,84656	BMI1,H1-2,H3-3A,H3-3B,MEN1,PHF2,RB1,SMARCA4,H3C1,TRIP12,RBM14,SPIN1,RIF1,LRIF1,SMARCAD1,GLYR1	16/309	TRUE	TRUE
2_Member	GO Cellular Components	GO:0000781	chromosome, telomeric region	-8.46077	-5.44235	983,1017,3020,3021,4221,6672,6741,7515,8290,23064,55183,55791	CDK1,CDK2,H3-3A,H3-3B,MEN1,SP100,SSB,XRCC1,H3-4,SETX,RIF1,LRIF1	12/177	TRUE	TRUE
2_Member	GO Biological Processes	GO:0031507	heterochromatin formation	-8.00846	-5.04119	648,3006,3020,3021,5925,6597,9320,10927,55183,55791,56916	BMI1,H1-2,H3-3A,H3-3B,RB1,SMARCA4,TRIP12,SPIN1,RIF1,LRIF1,SMARCAD1	11/155	TRUE	TRUE
2_Member	GO Biological Processes	GO:0045814	negative regulation of gene expression, epigenetic	-6.78289	-4.11664	648,3006,3020,3021,5925,6597,9320,10927,55183,55791,56916	BMI1,H1-2,H3-3A,H3-3B,RB1,SMARCA4,TRIP12,SPIN1,RIF1,LRIF1,SMARCAD1	11/204	TRUE	TRUE
2_Member	GO Cellular Components	GO:0000228	nuclear chromosome	-3.63159	-1.6412	3020,3021,7153,8290,9031,23064,55791,56916	H3-3A,H3-3B,TOP2A,H3-4,BAZ1B,SETX,LRIF1,SMARCAD1	8/238	TRUE	TRUE
3_Summary	GO Biological Processes	GO:0007059	chromosome segregation	-13.5585	-10.0049	699,1060,1063,2177,4288,4926,5925,7153,9232,9493,10403,10744,10982,24137,55143,56916,56992,79080,83540,140609,157313,983,5116,55968,284403,9659,1017,5339,10432,54443,5108,10142,372,1523,8674,9712,26286,55582,55738,10927,55183,302,54434,51512,8661,11113,9632,9871	BUB1,CENPC,CENPF,FANCD2,MKI67,NUMA1,RB1,TOP2A,PTTG1,KIF23,NDC80,PTTG2,MAPRE2,KIF4A,CDCA8,SMARCAD1,KIF15,CCDC86,NUF2,NEK7,CDCA2,CDK1,PCNT,NSFL1C,WDR62,PDE4DIP,CDK2,PLEC,RBM14,ANLN,PCM1,AKAP9,ARCN1,CUX1,VAMP4,USP6NL,ARFGAP3,KIF27,ARFGAP1,SPIN1,RIF1,ANXA2,SSH1,GTSE1,EIF3A,CIT,SEC24C,SEC24D	48/-	TRUE	TRUE
3_Member	GO Biological Processes	GO:0007059	chromosome segregation	-13.5585	-10.0049	699,1060,1063,2177,4288,4926,5925,7153,9232,9493,10403,10744,10982,24137,55143,56916,56992,79080,83540,140609,157313	BUB1,CENPC,CENPF,FANCD2,MKI67,NUMA1,RB1,TOP2A,PTTG1,KIF23,NDC80,PTTG2,MAPRE2,KIF4A,CDCA8,SMARCAD1,KIF15,CCDC86,NUF2,NEK7,CDCA2	21/343	TRUE	TRUE
3_Member	GO Biological Processes	GO:1902850	microtubule cytoskeleton organization involved in mitosis	-8.6072	-5.5653	983,4926,5116,9493,10403,24137,55143,55968,56992,83540,284403	CDK1,NUMA1,PCNT,KIF23,NDC80,KIF4A,CDCA8,NSFL1C,KIF15,NUF2,WDR62	11/136	TRUE	TRUE
3_Member	GO Biological Processes	GO:0007051	spindle organization	-8.60221	-5.5653	4926,5116,9493,9659,10403,10982,24137,55143,56992,83540,140609,284403	NUMA1,PCNT,KIF23,PDE4DIP,NDC80,MAPRE2,KIF4A,CDCA8,KIF15,NUF2,NEK7,WDR62	12/172	TRUE	TRUE
3_Member	GO Biological Processes	GO:0098813	nuclear chromosome segregation	-7.96193	-5.01045	1060,1063,2177,5925,7153,9232,9493,10403,10744,24137,55143,56992,83540	CENPC,CENPF,FANCD2,RB1,TOP2A,PTTG1,KIF23,NDC80,PTTG2,KIF4A,CDCA8,KIF15,NUF2	13/239	TRUE	TRUE
3_Member	GO Biological Processes	GO:0140694	membraneless organelle assembly	-7.35834	-4.54959	1017,1060,1063,4926,5339,9493,10403,10432,10982,24137,54443,55143,56992,140609,284403	CDK2,CENPC,CENPF,NUMA1,PLEC,KIF23,NDC80,RBM14,MAPRE2,KIF4A,ANLN,CDCA8,KIF15,NEK7,WDR62	15/372	TRUE	TRUE
3_Member	GO Biological Processes	GO:0000226	microtubule cytoskeleton organization	-6.88069	-4.19806	983,1017,4926,5108,5116,9493,9659,10142,10403,10432,10982,24137,55143,55968,56992,83540,140609,284403	CDK1,CDK2,NUMA1,PCM1,PCNT,KIF23,PDE4DIP,AKAP9,NDC80,RBM14,MAPRE2,KIF4A,CDCA8,NSFL1C,KIF15,NUF2,NEK7,WDR62	18/590	TRUE	TRUE
3_Member	GO Biological Processes	GO:0007052	mitotic spindle organization	-6.33864	-3.74618	5116,9493,10403,24137,55143,56992,83540,284403	PCNT,KIF23,NDC80,KIF4A,CDCA8,KIF15,NUF2,WDR62	8/101	TRUE	TRUE
3_Member	GO Biological Processes	GO:0051225	spindle assembly	-6.20892	-3.63636	4926,9493,10403,10982,24137,55143,56992,140609	NUMA1,KIF23,NDC80,MAPRE2,KIF4A,CDCA8,KIF15,NEK7	8/105	TRUE	TRUE
3_Member	GO Biological Processes	GO:0000819	sister chromatid segregation	-6.05914	-3.52902	1060,5925,7153,9493,10403,24137,55143,56992,83540	CENPC,RB1,TOP2A,KIF23,NDC80,KIF4A,CDCA8,KIF15,NUF2	9/149	TRUE	TRUE
3_Member	Reactome Gene Sets	R-HSA-6811442	Intra-Golgi and retrograde Golgi-to-ER traffic	-5.85876	-3.35775	372,1523,8674,9493,9712,24137,26286,55582,55738,56992	ARCN1,CUX1,VAMP4,KIF23,USP6NL,KIF4A,ARFGAP3,KIF27,ARFGAP1,KIF15	10/203	TRUE	TRUE
3_Member	GO Biological Processes	GO:0000280	nuclear division	-5.54211	-3.07289	1060,2177,7153,9232,9493,10403,10744,24137,55143,56992,79080,83540	CENPC,FANCD2,TOP2A,PTTG1,KIF23,NDC80,PTTG2,KIF4A,CDCA8,KIF15,CCDC86,NUF2	12/329	TRUE	TRUE
3_Member	Reactome Gene Sets	R-HSA-6811434	COPI-dependent Golgi-to-ER retrograde traffic	-5.25337	-2.87177	372,9493,24137,26286,55582,55738,56992	ARCN1,KIF23,KIF4A,ARFGAP3,KIF27,ARFGAP1,KIF15	7/100	TRUE	TRUE
3_Member	GO Biological Processes	GO:0048285	organelle fission	-5.15664	-2.79143	1060,2177,7153,9232,9493,10403,10744,24137,55143,56992,79080,83540	CENPC,FANCD2,TOP2A,PTTG1,KIF23,NDC80,PTTG2,KIF4A,CDCA8,KIF15,CCDC86,NUF2	12/359	TRUE	TRUE
3_Member	GO Cellular Components	GO:0005819	spindle	-4.84216	-2.52988	983,1063,4926,5925,9493,10927,10982,24137,55143,55183,56992,140609,284403	CDK1,CENPF,NUMA1,RB1,KIF23,SPIN1,MAPRE2,KIF4A,CDCA8,RIF1,KIF15,NEK7,WDR62	13/452	TRUE	TRUE
3_Member	GO Cellular Components	GO:0030496	midbody	-4.82405	-2.51532	302,983,1060,1063,9493,24137,54434,54443,55143	ANXA2,CDK1,CENPC,CENPF,KIF23,KIF4A,SSH1,ANLN,CDCA8	9/211	TRUE	TRUE
3_Member	GO Molecular Functions	GO:0008017	microtubule binding	-4.61729	-2.35335	1063,4926,9493,10403,10982,24137,51512,55582,56992,83540	CENPF,NUMA1,KIF23,NDC80,MAPRE2,KIF4A,GTSE1,KIF27,KIF15,NUF2	10/281	TRUE	TRUE
3_Member	GO Biological Processes	GO:0140014	mitotic nuclear division	-4.61526	-2.35335	1060,9493,10403,24137,55143,56992,79080,83540	CENPC,KIF23,NDC80,KIF4A,CDCA8,KIF15,CCDC86,NUF2	8/172	TRUE	TRUE
3_Member	Reactome Gene Sets	R-HSA-8856688	Golgi-to-ER retrograde transport	-4.42381	-2.20908	372,9493,24137,26286,55582,55738,56992	ARCN1,KIF23,KIF4A,ARFGAP3,KIF27,ARFGAP1,KIF15	7/134	TRUE	TRUE
3_Member	GO Biological Processes	GO:0000022	mitotic spindle elongation	-4.31269	-2.13421	9493,24137,55143	KIF23,KIF4A,CDCA8	3/11	TRUE	TRUE
3_Member	GO Biological Processes	GO:0051256	mitotic spindle midzone assembly	-4.31269	-2.13421	9493,24137,55143	KIF23,KIF4A,CDCA8	3/11	TRUE	TRUE
3_Member	GO Biological Processes	GO:0000070	mitotic sister chromatid segregation	-4.20584	-2.05272	1060,9493,10403,24137,55143,56992,83540	CENPC,KIF23,NDC80,KIF4A,CDCA8,KIF15,NUF2	7/145	TRUE	TRUE
3_Member	GO Biological Processes	GO:0051231	spindle elongation	-4.07816	-1.97226	9493,24137,55143	KIF23,KIF4A,CDCA8	3/13	TRUE	TRUE
3_Member	GO Biological Processes	GO:0051255	spindle midzone assembly	-3.9756	-1.90737	9493,24137,55143	KIF23,KIF4A,CDCA8	3/14	TRUE	TRUE
3_Member	GO Cellular Components	GO:0005874	microtubule	-3.83198	-1.80071	983,4926,5116,8661,9493,9659,10982,24137,51512,55582,56992,140609	CDK1,NUMA1,PCNT,EIF3A,KIF23,PDE4DIP,MAPRE2,KIF4A,GTSE1,KIF27,KIF15,NEK7	12/492	TRUE	TRUE
3_Member	GO Biological Processes	GO:0061640	cytoskeleton-dependent cytokinesis	-3.76065	-1.74403	5339,9493,11113,24137,54443,55143	PLEC,KIF23,CIT,KIF4A,ANLN,CDCA8	6/120	TRUE	TRUE
3_Member	GO Biological Processes	GO:0000910	cytokinesis	-3.70223	-1.69629	5339,9493,11113,24137,54443,55143	PLEC,KIF23,CIT,KIF4A,ANLN,CDCA8	6/123	TRUE	TRUE
3_Member	GO Molecular Functions	GO:0015631	tubulin binding	-3.4411	-1.48179	1063,4926,9493,10403,10982,24137,51512,55582,56992,83540	CENPF,NUMA1,KIF23,NDC80,MAPRE2,KIF4A,GTSE1,KIF27,KIF15,NUF2	10/391	TRUE	TRUE
3_Member	GO Biological Processes	GO:0000281	mitotic cytokinesis	-3.38108	-1.43881	9493,11113,24137,54443,55143	KIF23,CIT,KIF4A,ANLN,CDCA8	5/92	TRUE	TRUE
3_Member	GO Biological Processes	GO:0090307	mitotic spindle assembly	-3.36601	-1.42677	9493,24137,55143,56992	KIF23,KIF4A,CDCA8,KIF15	4/52	TRUE	TRUE
3_Member	Reactome Gene Sets	R-HSA-983189	Kinesins	-3.10161	-1.21619	9493,24137,55582,56992	KIF23,KIF4A,KIF27,KIF15	4/61	TRUE	FALSE
3_Member	GO Molecular Functions	GO:0003777	microtubule motor activity	-2.92434	-1.0712	9493,24137,55582,56992	KIF23,KIF4A,KIF27,KIF15	4/68	TRUE	FALSE
3_Member	Reactome Gene Sets	R-HSA-2132295	MHC class II antigen presentation	-2.76549	-0.946637	9493,9632,9871,24137,56992	KIF23,SEC24C,SEC24D,KIF4A,KIF15	5/126	TRUE	FALSE
3_Member	GO Cellular Components	GO:0005871	kinesin complex	-2.37228	-0.621029	9493,55582,56992	KIF23,KIF27,KIF15	3/48	TRUE	FALSE
3_Member	GO Cellular Components	GO:0005875	microtubule associated complex	-2.35385	-0.607461	9493,24137,55143,55582,56992	KIF23,KIF4A,CDCA8,KIF27,KIF15	5/157	TRUE	FALSE
3_Member	GO Biological Processes	GO:0032467	positive regulation of cytokinesis	-2.29809	-0.561268	9493,11113,55143	KIF23,CIT,CDCA8	3/51	TRUE	FALSE
3_Member	GO Molecular Functions	GO:0003774	cytoskeletal motor activity	-2.11547	-0.412321	9493,24137,55582,56992	KIF23,KIF4A,KIF27,KIF15	4/114	TRUE	FALSE
3_Member	GO Molecular Functions	GO:0120544	polypeptide conformation or assembly isomerase activity	-2.00211	-0.327747	9493,24137,55582,56992	KIF23,KIF4A,KIF27,KIF15	4/123	TRUE	FALSE
4_Summary	Reactome Gene Sets	R-HSA-68875	Mitotic Prophase	-9.59697	-6.37443	983,3020,3021,4926,5925,8290,8350,9883,57122,91754,140609,333932,1017,9493,24137,55582,55604,56992,55791,648,80012,100532731,9031,4221,6597,7343,221830,259282,302,813,2768,23657,135228,55183,10927,55553,1975,1981,3609,9076,55742,1060,4209,55738,5253,84159,5981,6741,1909,1399,10318,49855,55870,7153,10403,5339	CDK1,H3-3A,H3-3B,NUMA1,RB1,H3-4,H3C1,POM121,NUP107,NEK9,NEK7,H3C15,CDK2,KIF23,KIF4A,KIF27,CARMIL1,KIF15,LRIF1,BMI1,PHC3,COMMD3-BMI1,BAZ1B,MEN1,SMARCA4,UBTF,POLR1F,BOD1L1,ANXA2,CALU,GNA12,SLC7A11,CD109,RIF1,SPIN1,SOX6,EIF4B,EIF4G1,ILF3,CLDN1,PARVA,CENPC,MEF2D,ARFGAP1,PHF2,ARID5B,RFC1,SSB,EDNRA,CRKL,TNIP1,SCAPER,ASH1L,TOP2A,NDC80,PLEC	56/-	TRUE	TRUE
4_Member	Reactome Gene Sets	R-HSA-68875	Mitotic Prophase	-9.59697	-6.37443	983,3020,3021,4926,5925,8290,8350,9883,57122,91754,140609,333932	CDK1,H3-3A,H3-3B,NUMA1,RB1,H3-4,H3C1,POM121,NUP107,NEK9,NEK7,H3C15	12/141	TRUE	TRUE
4_Member	Reactome Gene Sets	R-HSA-983231	Factors involved in megakaryocyte development and platelet production	-6.56463	-3.92187	1017,3020,3021,8350,9493,24137,55582,55604,56992,333932	CDK2,H3-3A,H3-3B,H3C1,KIF23,KIF4A,KIF27,CARMIL1,KIF15,H3C15	10/170	TRUE	TRUE
4_Member	GO Cellular Components	GO:0000805	X chromosome	-6.18558	-3.6251	1017,3020,3021,55791	CDK2,H3-3A,H3-3B,LRIF1	4/11	TRUE	TRUE
4_Member	Reactome Gene Sets	R-HSA-2299718	Condensation of Prophase Chromosomes	-6.17864	-3.6251	983,3020,3021,5925,8290,8350,333932	CDK1,H3-3A,H3-3B,RB1,H3-4,H3C1,H3C15	7/73	TRUE	TRUE
4_Member	Reactome Gene Sets	R-HSA-2559583	Cellular Senescence	-6.11993	-3.57255	648,1017,3020,3021,5925,8290,8350,80012,333932,100532731	BMI1,CDK2,H3-3A,H3-3B,RB1,H3-4,H3C1,PHC3,H3C15,COMMD3-BMI1	10/190	TRUE	TRUE
4_Member	GO Biological Processes	GO:1902340	negative regulation of chromosome condensation	-5.91286	-3.40632	3020,3021,9031	H3-3A,H3-3B,BAZ1B	3/4	FALSE	TRUE
4_Member	Reactome Gene Sets	R-HSA-201722	Formation of the beta-catenin:TCF transactivating complex	-5.55948	-3.08512	3020,3021,4221,6597,8290,8350,333932	H3-3A,H3-3B,MEN1,SMARCA4,H3-4,H3C1,H3C15	7/90	TRUE	TRUE
4_Member	GO Biological Processes	GO:0090230	regulation of centromere complex assembly	-5.21825	-2.84492	3020,3021,5925	H3-3A,H3-3B,RB1	3/6	FALSE	TRUE
4_Member	GO Cellular Components	GO:0001740	Barr body	-4.97739	-2.64065	3020,3021,55791	H3-3A,H3-3B,LRIF1	3/7	FALSE	TRUE
4_Member	Reactome Gene Sets	R-HSA-212165	Epigenetic regulation of gene expression	-4.92263	-2.59588	3020,3021,4221,5925,6597,7343,8350,9031,221830,259282,333932	H3-3A,H3-3B,MEN1,RB1,SMARCA4,UBTF,H3C1,BAZ1B,POLR1F,BOD1L1,H3C15	11/317	TRUE	TRUE
4_Member	Reactome Gene Sets	R-HSA-2559580	Oxidative Stress Induced Senescence	-4.64052	-2.36574	648,3020,3021,8350,80012,333932,100532731	BMI1,H3-3A,H3-3B,H3C1,PHC3,H3C15,COMMD3-BMI1	7/124	TRUE	TRUE
4_Member	Reactome Gene Sets	R-HSA-109582	Hemostasis	-4.61008	-2.35133	302,813,1017,2768,3020,3021,8350,9493,23657,24137,55582,55604,56992,135228,333932	ANXA2,CALU,CDK2,GNA12,H3-3A,H3-3B,H3C1,KIF23,SLC7A11,KIF4A,KIF27,CARMIL1,KIF15,CD109,H3C15	15/621	TRUE	TRUE
4_Member	Reactome Gene Sets	R-HSA-912446	Meiotic recombination	-4.53967	-2.29637	1017,3020,3021,8290,8350,333932	CDK2,H3-3A,H3-3B,H3-4,H3C1,H3C15	6/87	FALSE	TRUE
4_Member	Reactome Gene Sets	R-HSA-5250924	B-WICH complex positively regulates rRNA expression	-4.45604	-2.23349	3020,3021,8350,9031,221830,333932	H3-3A,H3-3B,H3C1,BAZ1B,POLR1F,H3C15	6/90	TRUE	TRUE
4_Member	Reactome Gene Sets	R-HSA-73772	RNA Polymerase I Promoter Escape	-4.45604	-2.23349	3020,3021,7343,8350,221830,333932	H3-3A,H3-3B,UBTF,H3C1,POLR1F,H3C15	6/90	TRUE	TRUE
4_Member	GO Biological Processes	GO:0031509	subtelomeric heterochromatin formation	-4.31269	-2.13421	3020,3021,55183	H3-3A,H3-3B,RIF1	3/11	FALSE	TRUE
4_Member	GO Biological Processes	GO:0140719	constitutive heterochromatin formation	-4.19055	-2.04477	648,3020,3021,10927,55183	BMI1,H3-3A,H3-3B,SPIN1,RIF1	5/62	TRUE	TRUE
4_Member	Reactome Gene Sets	R-HSA-73728	RNA Polymerase I Promoter Opening	-4.19055	-2.04477	3020,3021,7343,8350,333932	H3-3A,H3-3B,UBTF,H3C1,H3C15	5/62	FALSE	TRUE
4_Member	KEGG Pathway	hsa05202	Transcriptional misregulation in cancer	-4.13594	-2.01147	648,3020,3021,4221,8290,8350,333932,100532731	BMI1,H3-3A,H3-3B,MEN1,H3-4,H3C1,H3C15,COMMD3-BMI1	8/201	TRUE	TRUE
4_Member	Reactome Gene Sets	R-HSA-9764560	Regulation of CDH1 Gene Transcription	-4.12664	-2.00446	3020,3021,5925,6597,8350,333932	H3-3A,H3-3B,RB1,SMARCA4,H3C1,H3C15	6/103	TRUE	TRUE
4_Member	Reactome Gene Sets	R-HSA-5250913	Positive epigenetic regulation of rRNA expression	-4.08014	-1.97226	3020,3021,8350,9031,221830,333932	H3-3A,H3-3B,H3C1,BAZ1B,POLR1F,H3C15	6/105	TRUE	TRUE
4_Member	Reactome Gene Sets	R-HSA-5578749	Transcriptional regulation by small RNAs	-4.08014	-1.97226	3020,3021,8350,9883,57122,333932	H3-3A,H3-3B,H3C1,POM121,NUP107,H3C15	6/105	TRUE	TRUE
4_Member	Reactome Gene Sets	R-HSA-427413	NoRC negatively regulates rRNA expression	-4.05727	-1.95749	3020,3021,7343,8350,221830,333932	H3-3A,H3-3B,UBTF,H3C1,POLR1F,H3C15	6/106	TRUE	TRUE
4_Member	GO Cellular Components	GO:0000803	sex chromosome	-4.04048	-1.94719	1017,3020,3021,55791	CDK2,H3-3A,H3-3B,LRIF1	4/35	TRUE	TRUE
4_Member	Reactome Gene Sets	R-HSA-5250941	Negative epigenetic regulation of rRNA expression	-3.99009	-1.91447	3020,3021,7343,8350,221830,333932	H3-3A,H3-3B,UBTF,H3C1,POLR1F,H3C15	6/109	TRUE	TRUE
4_Member	Reactome Gene Sets	R-HSA-73854	RNA Polymerase I Promoter Clearance	-3.99009	-1.91447	3020,3021,7343,8350,221830,333932	H3-3A,H3-3B,UBTF,H3C1,POLR1F,H3C15	6/109	TRUE	TRUE
4_Member	GO Biological Processes	GO:0060623	regulation of chromosome condensation	-3.9756	-1.90737	3020,3021,9031	H3-3A,H3-3B,BAZ1B	3/14	FALSE	TRUE
4_Member	Reactome Gene Sets	R-HSA-73864	RNA Polymerase I Transcription	-3.94647	-1.88629	3020,3021,7343,8350,221830,333932	H3-3A,H3-3B,UBTF,H3C1,POLR1F,H3C15	6/111	TRUE	TRUE
4_Member	Reactome Gene Sets	R-HSA-201681	TCF dependent signaling in response to WNT	-3.90521	-1.85488	3020,3021,4221,6597,8290,8350,55553,333932	H3-3A,H3-3B,MEN1,SMARCA4,H3-4,H3C1,SOX6,H3C15	8/217	TRUE	TRUE
4_Member	Reactome Gene Sets	R-HSA-9917777	Epigenetic regulation by WDR5-containing histone modifying complexes	-3.85459	-1.81768	3020,3021,4221,5925,8350,259282,333932	H3-3A,H3-3B,MEN1,RB1,H3C1,BOD1L1,H3C15	7/165	TRUE	TRUE
4_Member	Reactome Gene Sets	R-HSA-8878171	Transcriptional regulation by RUNX1	-3.8507	-1.81567	648,3020,3021,6597,8350,80012,333932,100532731	BMI1,H3-3A,H3-3B,SMARCA4,H3C1,PHC3,H3C15,COMMD3-BMI1	8/221	TRUE	TRUE
4_Member	Reactome Gene Sets	R-HSA-1500620	Meiosis	-3.7805	-1.75661	1017,3020,3021,8290,8350,333932	CDK2,H3-3A,H3-3B,H3-4,H3C1,H3C15	6/119	FALSE	TRUE
4_Member	Reactome Gene Sets	R-HSA-9816359	Maternal to zygotic transition (MZT)	-3.76065	-1.74403	1975,1981,3020,3021,8350,333932	EIF4B,EIF4G1,H3-3A,H3-3B,H3C1,H3C15	6/120	TRUE	TRUE
4_Member	Reactome Gene Sets	R-HSA-446728	Cell junction organization	-3.67161	-1.66742	3020,3021,3609,5925,6597,8350,9076,55742,333932	H3-3A,H3-3B,ILF3,RB1,SMARCA4,H3C1,CLDN1,PARVA,H3C15	9/298	TRUE	TRUE
4_Member	GO Molecular Functions	GO:0001046	core promoter sequence-specific DNA binding	-3.6093	-1.62564	3020,3021,6597,7343	H3-3A,H3-3B,SMARCA4,UBTF	4/45	TRUE	TRUE
4_Member	GO Cellular Components	GO:0000939	inner kinetochore	-3.56124	-1.5809	1060,3020,3021	CENPC,H3-3A,H3-3B	3/19	FALSE	TRUE
4_Member	Reactome Gene Sets	R-HSA-2262752	Cellular responses to stress	-3.46013	-1.49447	648,1017,3020,3021,4209,5925,8290,8350,9883,23657,55738,57122,80012,333932,100532731	BMI1,CDK2,H3-3A,H3-3B,MEF2D,RB1,H3-4,H3C1,POM121,SLC7A11,ARFGAP1,NUP107,PHC3,H3C15,COMMD3-BMI1	15/790	TRUE	TRUE
4_Member	Reactome Gene Sets	R-HSA-211000	Gene Silencing by RNA	-3.44975	-1.48713	3020,3021,8350,9883,57122,333932	H3-3A,H3-3B,H3C1,POM121,NUP107,H3C15	6/137	TRUE	TRUE
4_Member	Reactome Gene Sets	R-HSA-9616222	Transcriptional regulation of granulopoiesis	-3.44759	-1.48671	1017,3020,3021,8350,333932	CDK2,H3-3A,H3-3B,H3C1,H3C15	5/89	FALSE	TRUE
4_Member	Reactome Gene Sets	R-HSA-3214842	HDMs demethylate histones	-3.43166	-1.47707	5253,8350,84159,333932	PHF2,H3C1,ARID5B,H3C15	4/50	TRUE	TRUE
4_Member	Reactome Gene Sets	R-HSA-73886	Chromosome Maintenance	-3.39953	-1.45422	1017,1060,3020,3021,5981,8290	CDK2,CENPC,H3-3A,H3-3B,RFC1,H3-4	6/140	TRUE	TRUE
4_Member	Reactome Gene Sets	R-HSA-9764725	Negative Regulation of CDH1 Gene Transcription	-3.35945	-1.42171	3020,3021,6597,8350,333932	H3-3A,H3-3B,SMARCA4,H3C1,H3C15	5/93	FALSE	TRUE
4_Member	KEGG Pathway	hsa05322	Systemic lupus erythematosus	-3.3345	-1.39976	3020,3021,6741,8290,8350,333932	H3-3A,H3-3B,SSB,H3-4,H3C1,H3C15	6/144	FALSE	TRUE
4_Member	Reactome Gene Sets	R-HSA-1500931	Cell-Cell communication	-3.31047	-1.3787	3020,3021,3609,5925,6597,8350,9076,55742,333932	H3-3A,H3-3B,ILF3,RB1,SMARCA4,H3C1,CLDN1,PARVA,H3C15	9/334	TRUE	TRUE
4_Member	Reactome Gene Sets	R-HSA-9845323	Regulation of endogenous retroelements by Piwi-interacting RNAs (piRNAs)	-3.2755	-1.35253	3020,3021,6597,8350,333932	H3-3A,H3-3B,SMARCA4,H3C1,H3C15	5/97	FALSE	TRUE
4_Member	Reactome Gene Sets	R-HSA-421270	Cell-cell junction organization	-3.24579	-1.33003	3020,3021,3609,5925,6597,8350,9076,333932	H3-3A,H3-3B,ILF3,RB1,SMARCA4,H3C1,CLDN1,H3C15	8/272	TRUE	TRUE
4_Member	Reactome Gene Sets	R-HSA-1474165	Reproduction	-3.13692	-1.24414	1017,3020,3021,8290,8350,333932	CDK2,H3-3A,H3-3B,H3-4,H3C1,H3C15	6/157	FALSE	FALSE
4_Member	Reactome Gene Sets	R-HSA-9759476	Regulation of Homotypic Cell-Cell Adhesion	-3.13627	-1.24414	3020,3021,3609,5925,6597,8350,333932	H3-3A,H3-3B,ILF3,RB1,SMARCA4,H3C1,H3C15	7/217	TRUE	FALSE
4_Member	Reactome Gene Sets	R-HSA-5334118	DNA methylation	-3.023	-1.14941	3020,3021,8350,333932	H3-3A,H3-3B,H3C1,H3C15	4/64	FALSE	FALSE
4_Member	Reactome Gene Sets	R-HSA-2559582	Senescence-Associated Secretory Phenotype (SASP)	-3.01007	-1.13778	1017,3020,3021,8350,333932	CDK2,H3-3A,H3-3B,H3C1,H3C15	5/111	FALSE	FALSE
4_Member	Reactome Gene Sets	R-HSA-157579	Telomere Maintenance	-2.9926	-1.12672	1017,3020,3021,5981,8290	CDK2,H3-3A,H3-3B,RFC1,H3-4	5/112	TRUE	FALSE
4_Member	Reactome Gene Sets	R-HSA-5625886	Activated PKN1 stimulates transcription of AR (androgen receptor) regulated genes KLK2 and KLK3	-2.97284	-1.1095	3020,3021,8350,333932	H3-3A,H3-3B,H3C1,H3C15	4/66	FALSE	FALSE
4_Member	Reactome Gene Sets	R-HSA-427359	SIRT1 negatively regulates rRNA expression	-2.94839	-1.08883	3020,3021,8350,333932	H3-3A,H3-3B,H3C1,H3C15	4/67	FALSE	FALSE
4_Member	Reactome Gene Sets	R-HSA-68616	Assembly of the ORC complex at the origin of replication	-2.92434	-1.0712	3020,3021,8350,333932	H3-3A,H3-3B,H3C1,H3C15	4/68	FALSE	FALSE
4_Member	Reactome Gene Sets	R-HSA-418990	Adherens junctions interactions	-2.88236	-1.0367	3020,3021,3609,5925,6597,8350,333932	H3-3A,H3-3B,ILF3,RB1,SMARCA4,H3C1,H3C15	7/240	TRUE	FALSE
4_Member	GO Biological Processes	GO:0001556	oocyte maturation	-2.88024	-1.0367	1909,3020,3021	EDNRA,H3-3A,H3-3B	3/32	FALSE	FALSE
4_Member	Reactome Gene Sets	R-HSA-9821002	Chromatin modifications during the maternal to zygotic transition (MZT)	-2.87743	-1.0363	3020,3021,8350,333932	H3-3A,H3-3B,H3C1,H3C15	4/70	FALSE	FALSE
4_Member	Reactome Gene Sets	R-HSA-9843970	Regulation of endogenous retroelements by the Human Silencing Hub (HUSH) complex	-2.87743	-1.0363	3020,3021,8350,333932	H3-3A,H3-3B,H3C1,H3C15	4/70	FALSE	FALSE
4_Member	Reactome Gene Sets	R-HSA-212300	PRC2 methylates histones and DNA	-2.83199	-0.998019	3020,3021,8350,333932	H3-3A,H3-3B,H3C1,H3C15	4/72	FALSE	FALSE
4_Member	Reactome Gene Sets	R-HSA-9710421	Defective pyroptosis	-2.83199	-0.998019	3020,3021,8350,333932	H3-3A,H3-3B,H3C1,H3C15	4/72	FALSE	FALSE
4_Member	Reactome Gene Sets	R-HSA-195721	Signaling by WNT	-2.82776	-0.995651	3020,3021,4221,6597,8290,8350,55553,333932	H3-3A,H3-3B,MEN1,SMARCA4,H3-4,H3C1,SOX6,H3C15	8/316	TRUE	FALSE
4_Member	Reactome Gene Sets	R-HSA-69306	DNA Replication	-2.78242	-0.95782	1017,3020,3021,5981,8350,333932	CDK2,H3-3A,H3-3B,RFC1,H3C1,H3C15	6/184	TRUE	FALSE
4_Member	Reactome Gene Sets	R-HSA-427389	ERCC6 (CSB) and EHMT2 (G9a) positively regulate rRNA expression	-2.76643	-0.946637	3020,3021,8350,333932	H3-3A,H3-3B,H3C1,H3C15	4/75	FALSE	FALSE
4_Member	KEGG Pathway	hsa05131	Shigellosis	-2.75187	-0.936433	1399,3020,3021,8290,8350,10318,333932	CRKL,H3-3A,H3-3B,H3-4,H3C1,TNIP1,H3C15	7/253	TRUE	FALSE
4_Member	Reactome Gene Sets	R-HSA-1266695	Interleukin-7 signaling	-2.73067	-0.919745	6597,8350,333932	SMARCA4,H3C1,H3C15	3/36	FALSE	FALSE
4_Member	Reactome Gene Sets	R-HSA-9818564	Epigenetic regulation of gene expression by MLL3 and MLL4 complexes	-2.64857	-0.850913	3020,3021,5925,8350,333932	H3-3A,H3-3B,RB1,H3C1,H3C15	5/134	FALSE	FALSE
4_Member	Reactome Gene Sets	R-HSA-9841922	MLL4 and MLL3 complexes regulate expression of PPARG target genes in adipogenesis and hepatic steatosis	-2.64857	-0.850913	3020,3021,5925,8350,333932	H3-3A,H3-3B,RB1,H3C1,H3C15	5/134	FALSE	FALSE
4_Member	Reactome Gene Sets	R-HSA-9851695	Epigenetic regulation of adipogenesis genes by MLL3 and MLL4 complexes	-2.64857	-0.850913	3020,3021,5925,8350,333932	H3-3A,H3-3B,RB1,H3C1,H3C15	5/134	FALSE	FALSE
4_Member	Reactome Gene Sets	R-HSA-9764265	Regulation of CDH1 Expression and Function	-2.59007	-0.802096	3020,3021,5925,6597,8350,333932	H3-3A,H3-3B,RB1,SMARCA4,H3C1,H3C15	6/201	TRUE	FALSE
4_Member	Reactome Gene Sets	R-HSA-9764274	Regulation of Expression and Function of Type I Classical Cadherins	-2.59007	-0.802096	3020,3021,5925,6597,8350,333932	H3-3A,H3-3B,RB1,SMARCA4,H3C1,H3C15	6/201	TRUE	FALSE
4_Member	Reactome Gene Sets	R-HSA-9842860	Regulation of endogenous retroelements	-2.53963	-0.766007	3020,3021,6597,8350,333932	H3-3A,H3-3B,SMARCA4,H3C1,H3C15	5/142	FALSE	FALSE
4_Member	Reactome Gene Sets	R-HSA-69002	DNA Replication Pre-Initiation	-2.45014	-0.688992	1017,3020,3021,8350,333932	CDK2,H3-3A,H3-3B,H3C1,H3C15	5/149	FALSE	FALSE
4_Member	GO Biological Processes	GO:0008584	male gonad development	-2.43776	-0.677619	1399,3020,3021,49855,84159	CRKL,H3-3A,H3-3B,SCAPER,ARID5B	5/150	TRUE	FALSE
4_Member	Reactome Gene Sets	R-HSA-5625740	RHO GTPases activate PKNs	-2.42682	-0.667672	3020,3021,8350,333932	H3-3A,H3-3B,H3C1,H3C15	4/93	FALSE	FALSE
4_Member	GO Biological Processes	GO:0046546	development of primary male sexual characteristics	-2.42549	-0.667338	1399,3020,3021,49855,84159	CRKL,H3-3A,H3-3B,SCAPER,ARID5B	5/151	TRUE	FALSE
4_Member	Reactome Gene Sets	R-HSA-8936459	RUNX1 regulates genes involved in megakaryocyte differentiation and platelet function	-2.41021	-0.653048	3020,3021,8350,333932	H3-3A,H3-3B,H3C1,H3C15	4/94	FALSE	FALSE
4_Member	Reactome Gene Sets	R-HSA-1912408	Pre-NOTCH Transcription and Translation	-2.37759	-0.623391	3020,3021,8350,333932	H3-3A,H3-3B,H3C1,H3C15	4/96	FALSE	FALSE
4_Member	Reactome Gene Sets	R-HSA-9645723	Diseases of programmed cell death	-2.29936	-0.561593	3020,3021,8350,333932	H3-3A,H3-3B,H3C1,H3C15	4/101	FALSE	FALSE
4_Member	GO Biological Processes	GO:0048608	reproductive structure development	-2.28922	-0.553348	1399,3020,3021,49855,55870,57122,84159	CRKL,H3-3A,H3-3B,SCAPER,ASH1L,NUP107,ARID5B	7/307	TRUE	FALSE
4_Member	GO Biological Processes	GO:0008406	gonad development	-2.26858	-0.535531	1399,3020,3021,49855,57122,84159	CRKL,H3-3A,H3-3B,SCAPER,NUP107,ARID5B	6/234	TRUE	FALSE
4_Member	GO Biological Processes	GO:0061458	reproductive system development	-2.25181	-0.524346	1399,3020,3021,49855,55870,57122,84159	CRKL,H3-3A,H3-3B,SCAPER,ASH1L,NUP107,ARID5B	7/312	TRUE	FALSE
4_Member	GO Biological Processes	GO:0045137	development of primary sexual characteristics	-2.22488	-0.501111	1399,3020,3021,49855,57122,84159	CRKL,H3-3A,H3-3B,SCAPER,NUP107,ARID5B	6/239	TRUE	FALSE
4_Member	Reactome Gene Sets	R-HSA-9843940	Regulation of endogenous retroelements by KRAB-ZFP proteins	-2.21124	-0.488381	3020,3021,8350,333932	H3-3A,H3-3B,H3C1,H3C15	4/107	FALSE	FALSE
4_Member	GO Biological Processes	GO:0007292	female gamete generation	-2.19889	-0.480589	1909,3020,3021,7153,10403	EDNRA,H3-3A,H3-3B,TOP2A,NDC80	5/171	TRUE	FALSE
4_Member	Reactome Gene Sets	R-HSA-977225	Amyloid fiber formation	-2.18314	-0.469351	3020,3021,8350,333932	H3-3A,H3-3B,H3C1,H3C15	4/109	FALSE	FALSE
4_Member	GO Biological Processes	GO:0046661	male sex differentiation	-2.1677	-0.455703	1399,3020,3021,49855,84159	CRKL,H3-3A,H3-3B,SCAPER,ARID5B	5/174	TRUE	FALSE
4_Member	Reactome Gene Sets	R-HSA-1912422	Pre-NOTCH Expression and Processing	-2.14211	-0.436325	3020,3021,8350,333932	H3-3A,H3-3B,H3C1,H3C15	4/112	FALSE	FALSE
4_Member	GO Biological Processes	GO:0035264	multicellular organism growth	-2.10236	-0.402905	3020,3021,5339,84159	H3-3A,H3-3B,PLEC,ARID5B	4/115	TRUE	FALSE
4_Member	Reactome Gene Sets	R-HSA-8939236	RUNX1 regulates transcription of genes involved in differentiation of HSCs	-2.10236	-0.402905	3020,3021,8350,333932	H3-3A,H3-3B,H3C1,H3C15	4/115	FALSE	FALSE
4_Member	GO Biological Processes	GO:0048599	oocyte development	-2.1017	-0.402905	1909,3020,3021	EDNRA,H3-3A,H3-3B	3/60	FALSE	FALSE
4_Member	Reactome Gene Sets	R-HSA-9610379	HCMV Late Events	-2.08938	-0.392316	8350,9883,57122,333932	H3C1,POM121,NUP107,H3C15	4/116	TRUE	FALSE
4_Member	GO Biological Processes	GO:0007338	single fertilization	-2.03987	-0.354462	983,1399,3020,3021,55870	CDK1,CRKL,H3-3A,H3-3B,ASH1L	5/187	TRUE	FALSE
4_Member	GO Biological Processes	GO:0009994	oocyte differentiation	-2.02478	-0.341315	1909,3020,3021	EDNRA,H3-3A,H3-3B	3/64	FALSE	FALSE
4_Member	Reactome Gene Sets	R-HSA-5617472	Activation of anterior HOX genes in hindbrain development during early embryogenesis	-2.01421	-0.334903	3020,3021,8350,333932	H3-3A,H3-3B,H3C1,H3C15	4/122	FALSE	FALSE
4_Member	Reactome Gene Sets	R-HSA-5619507	Activation of HOX genes during differentiation	-2.01421	-0.334903	3020,3021,8350,333932	H3-3A,H3-3B,H3C1,H3C15	4/122	FALSE	FALSE
4_Member	KEGG Pathway	hsa05034	Alcoholism	-2.00276	-0.327747	3020,3021,8290,8350,333932	H3-3A,H3-3B,H3-4,H3C1,H3C15	5/191	FALSE	FALSE
5_Summary	GO Molecular Functions	GO:0003682	chromatin binding	-9.45197	-6.25745	648,983,1063,2956,3006,3008,3009,3020,3021,4221,6597,7153,7343,8971,9557,29089,55870,56916,80012,81550,84656,333932,1060,8290,8350,55183,3178,7515,1017,84126,140609	BMI1,CDK1,CENPF,MSH6,H1-2,H1-4,H1-5,H3-3A,H3-3B,MEN1,SMARCA4,TOP2A,UBTF,H1-10,CHD1L,UBE2T,ASH1L,SMARCAD1,PHC3,TDRD3,GLYR1,H3C15,CENPC,H3-4,H3C1,RIF1,HNRNPA1,XRCC1,CDK2,ATRIP,NEK7	31/-	TRUE	TRUE
5_Member	GO Molecular Functions	GO:0003682	chromatin binding	-9.45197	-6.25745	648,983,1063,2956,3006,3008,3009,3020,3021,4221,6597,7153,7343,8971,9557,29089,55870,56916,80012,81550,84656,333932	BMI1,CDK1,CENPF,MSH6,H1-2,H1-4,H1-5,H3-3A,H3-3B,MEN1,SMARCA4,TOP2A,UBTF,H1-10,CHD1L,UBE2T,ASH1L,SMARCAD1,PHC3,TDRD3,GLYR1,H3C15	22/625	TRUE	TRUE
5_Member	GO Molecular Functions	GO:0031491	nucleosome binding	-8.71761	-5.6412	3006,3008,3009,3020,3021,6597,8971,9557,84656	H1-2,H1-4,H1-5,H3-3A,H3-3B,SMARCA4,H1-10,CHD1L,GLYR1	9/74	TRUE	TRUE
5_Member	GO Biological Processes	GO:0065004	protein-DNA complex assembly	-8.11622	-5.13256	1060,1063,3006,3008,3009,3020,3021,6597,7343,8290,8350,8971,333932	CENPC,CENPF,H1-2,H1-4,H1-5,H3-3A,H3-3B,SMARCA4,UBTF,H3-4,H3C1,H1-10,H3C15	13/232	TRUE	TRUE
5_Member	GO Molecular Functions	GO:0031492	nucleosomal DNA binding	-7.88251	-4.94628	3006,3008,3009,3020,3021,6597,8971	H1-2,H1-4,H1-5,H3-3A,H3-3B,SMARCA4,H1-10	7/42	TRUE	TRUE
5_Member	GO Biological Processes	GO:0071824	protein-DNA complex organization	-7.68871	-4.78143	1060,1063,3006,3008,3009,3020,3021,6597,7343,8290,8350,8971,333932	CENPC,CENPF,H1-2,H1-4,H1-5,H3-3A,H3-3B,SMARCA4,UBTF,H3-4,H3C1,H1-10,H3C15	13/252	TRUE	TRUE
5_Member	GO Molecular Functions	GO:0030527	structural constituent of chromatin	-7.58615	-4.719	3006,3008,3009,3020,3021,8290,8350,8971,333932	H1-2,H1-4,H1-5,H3-3A,H3-3B,H3-4,H3C1,H1-10,H3C15	9/99	TRUE	TRUE
5_Member	GO Cellular Components	GO:0000786	nucleosome	-7.50779	-4.66545	3006,3008,3009,3020,3021,8290,8350,8971,84656,333932	H1-2,H1-4,H1-5,H3-3A,H3-3B,H3-4,H3C1,H1-10,GLYR1,H3C15	10/135	TRUE	TRUE
5_Member	GO Biological Processes	GO:0034728	nucleosome organization	-7.35716	-4.54959	3006,3008,3009,3020,3021,6597,8290,8350,8971,333932	H1-2,H1-4,H1-5,H3-3A,H3-3B,SMARCA4,H3-4,H3C1,H1-10,H3C15	10/140	TRUE	TRUE
5_Member	GO Biological Processes	GO:0006334	nucleosome assembly	-6.85827	-4.18391	3006,3008,3009,3020,3021,8290,8350,8971,333932	H1-2,H1-4,H1-5,H3-3A,H3-3B,H3-4,H3C1,H1-10,H3C15	9/120	TRUE	TRUE
5_Member	GO Biological Processes	GO:0030261	chromosome condensation	-6.47765	-3.85717	983,3006,3008,3009,7153,8971	CDK1,H1-2,H1-4,H1-5,TOP2A,H1-10	6/41	TRUE	TRUE
5_Member	GO Biological Processes	GO:0045910	negative regulation of DNA recombination	-5.65577	-3.17621	2956,3006,3008,3009,8971,55183	MSH6,H1-2,H1-4,H1-5,H1-10,RIF1	6/56	TRUE	TRUE
5_Member	GO Biological Processes	GO:0051053	negative regulation of DNA metabolic process	-5.26702	-2.87698	2956,3006,3008,3009,3178,7515,8971,55183	MSH6,H1-2,H1-4,H1-5,HNRNPA1,XRCC1,H1-10,RIF1	8/140	TRUE	TRUE
5_Member	GO Cellular Components	GO:0032993	protein-DNA complex	-5.1787	-2.80945	3006,3008,3009,3020,3021,8290,8350,8971,84656,333932	H1-2,H1-4,H1-5,H3-3A,H3-3B,H3-4,H3C1,H1-10,GLYR1,H3C15	10/242	TRUE	TRUE
5_Member	GO Biological Processes	GO:0051052	regulation of DNA metabolic process	-5.06205	-2.70481	983,1017,2956,3006,3008,3009,3178,6597,7515,8971,55183,56916,84126,140609	CDK1,CDK2,MSH6,H1-2,H1-4,H1-5,HNRNPA1,SMARCA4,XRCC1,H1-10,RIF1,SMARCAD1,ATRIP,NEK7	14/498	TRUE	TRUE
5_Member	GO Molecular Functions	GO:0031490	chromatin DNA binding	-4.48683	-2.25255	3006,3008,3009,3020,3021,6597,8971	H1-2,H1-4,H1-5,H3-3A,H3-3B,SMARCA4,H1-10	7/131	TRUE	TRUE
5_Member	GO Biological Processes	GO:0000018	regulation of DNA recombination	-4.18698	-2.04361	2956,3006,3008,3009,8971,55183,56916	MSH6,H1-2,H1-4,H1-5,H1-10,RIF1,SMARCAD1	7/146	TRUE	TRUE
5_Member	GO Cellular Components	GO:0000791	euchromatin	-2.04349	-0.355822	3006,3008,3009	H1-2,H1-4,H1-5	3/63	TRUE	FALSE
6_Summary	GO Biological Processes	GO:0006259	DNA metabolic process	-9.30363	-6.16027	983,1017,1063,2177,2956,4221,5981,6672,7153,7515,9232,9320,9557,23064,29089,55183,56852,56916,63901,63967,79068,81550,84126,259282,8290,9031	CDK1,CDK2,CENPF,FANCD2,MSH6,MEN1,RFC1,SP100,TOP2A,XRCC1,PTTG1,TRIP12,CHD1L,SETX,UBE2T,RIF1,RAD18,SMARCAD1,FAM111A,CLSPN,FTO,TDRD3,ATRIP,BOD1L1,H3-4,BAZ1B	26/-	TRUE	TRUE
6_Member	GO Biological Processes	GO:0006259	DNA metabolic process	-9.30363	-6.16027	983,1017,1063,2177,2956,4221,5981,6672,7153,7515,9232,9320,9557,23064,29089,55183,56852,56916,63901,63967,79068,81550,84126,259282	CDK1,CDK2,CENPF,FANCD2,MSH6,MEN1,RFC1,SP100,TOP2A,XRCC1,PTTG1,TRIP12,CHD1L,SETX,UBE2T,RIF1,RAD18,SMARCAD1,FAM111A,CLSPN,FTO,TDRD3,ATRIP,BOD1L1	24/762	TRUE	TRUE
6_Member	GO Biological Processes	GO:0006281	DNA repair	-9.03621	-5.93861	983,1017,2177,2956,4221,5981,7515,9232,9320,9557,23064,29089,55183,56852,56916,63901,63967,79068,84126,259282	CDK1,CDK2,FANCD2,MSH6,MEN1,RFC1,XRCC1,PTTG1,TRIP12,CHD1L,SETX,UBE2T,RIF1,RAD18,SMARCAD1,FAM111A,CLSPN,FTO,ATRIP,BOD1L1	20/538	TRUE	TRUE
6_Member	Reactome Gene Sets	R-HSA-73894	DNA Repair	-7.10937	-4.35955	1017,2177,2956,5981,7515,8290,9031,9557,29089,55183,56852,63967,79068,84126	CDK2,FANCD2,MSH6,RFC1,XRCC1,H3-4,BAZ1B,CHD1L,UBE2T,RIF1,RAD18,CLSPN,FTO,ATRIP	14/334	TRUE	TRUE
6_Member	GO Cellular Components	GO:0005657	replication fork	-2.76643	-0.946637	5981,9031,56852,56916	RFC1,BAZ1B,RAD18,SMARCAD1	4/75	TRUE	FALSE
6_Member	GO Cellular Components	GO:0090734	site of DNA damage	-2.63454	-0.837965	7515,9557,55183,56852,56916	XRCC1,CHD1L,RIF1,RAD18,SMARCAD1	5/135	TRUE	FALSE
6_Member	GO Molecular Functions	GO:0140030	modification-dependent protein binding	-2.58624	-0.801446	7515,9557,56852,84126	XRCC1,CHD1L,RAD18,ATRIP	4/84	TRUE	FALSE
6_Member	GO Cellular Components	GO:0035861	site of double-strand break	-2.31464	-0.571914	9557,55183,56852,56916	CHD1L,RIF1,RAD18,SMARCAD1	4/100	TRUE	FALSE
7_Summary	GO Molecular Functions	GO:0045296	cadherin binding	-7.10937	-4.35955	302,1399,2023,2317,5339,7458,8350,8971,11252,54443,55742,55854,64787,79026,2768,7739,9493,10391,10982,58504,64759,9659,23657	ANXA2,CRKL,ENO1,FLNB,PLEC,EIF4H,H3C1,H1-10,PACSIN2,ANLN,PARVA,ZC3H15,EPS8L2,AHNAK,GNA12,ZNF185,KIF23,CORO2B,MAPRE2,ARHGAP22,TNS3,PDE4DIP,SLC7A11	23/-	TRUE	TRUE
7_Member	GO Molecular Functions	GO:0045296	cadherin binding	-7.10937	-4.35955	302,1399,2023,2317,5339,7458,8350,8971,11252,54443,55742,55854,64787,79026	ANXA2,CRKL,ENO1,FLNB,PLEC,EIF4H,H3C1,H1-10,PACSIN2,ANLN,PARVA,ZC3H15,EPS8L2,AHNAK	14/334	TRUE	TRUE
7_Member	GO Cellular Components	GO:0005925	focal adhesion	-4.45298	-2.23333	2317,2768,5339,7739,9493,10391,10982,11252,55742,58504,64759,79026	FLNB,GNA12,PLEC,ZNF185,KIF23,CORO2B,MAPRE2,PACSIN2,PARVA,ARHGAP22,TNS3,AHNAK	12/423	TRUE	TRUE
7_Member	GO Cellular Components	GO:0030055	cell-substrate junction	-4.35517	-2.14966	2317,2768,5339,7739,9493,10391,10982,11252,55742,58504,64759,79026	FLNB,GNA12,PLEC,ZNF185,KIF23,CORO2B,MAPRE2,PACSIN2,PARVA,ARHGAP22,TNS3,AHNAK	12/433	TRUE	TRUE
7_Member	GO Molecular Functions	GO:0050839	cell adhesion molecule binding	-3.91146	-1.85606	302,1399,2023,2317,5339,7458,8350,8971,11252,54443,55742,55854,64787,79026	ANXA2,CRKL,ENO1,FLNB,PLEC,EIF4H,H3C1,H1-10,PACSIN2,ANLN,PARVA,ZC3H15,EPS8L2,AHNAK	14/636	TRUE	TRUE
7_Member	GO Cellular Components	GO:0030016	myofibril	-2.19076	-0.47427	2023,2317,5339,9659,55742,79026	ENO1,FLNB,PLEC,PDE4DIP,PARVA,AHNAK	6/243	TRUE	FALSE
7_Member	GO Cellular Components	GO:0005903	brush border	-2.18314	-0.469351	2317,2768,5339,23657	FLNB,GNA12,PLEC,SLC7A11	4/109	TRUE	FALSE
7_Member	GO Cellular Components	GO:0098862	cluster of actin-based cell projections	-2.15745	-0.446989	2317,2768,5339,23657,64787	FLNB,GNA12,PLEC,SLC7A11,EPS8L2	5/175	TRUE	FALSE
7_Member	GO Cellular Components	GO:0043292	contractile muscle fiber	-2.10853	-0.406251	2023,2317,5339,9659,55742,79026	ENO1,FLNB,PLEC,PDE4DIP,PARVA,AHNAK	6/253	TRUE	FALSE
8_Summary	Reactome Gene Sets	R-HSA-199991	Membrane Trafficking	-7.10497	-4.35955	372,1523,8674,9185,9493,9632,9712,9871,11252,24137,26286,54453,54885,55582,55738,56992,57706,64786,85021,613,648,2768,5151,5981,9910,57181,58504,91754,64787	ARCN1,CUX1,VAMP4,REPS2,KIF23,SEC24C,USP6NL,SEC24D,PACSIN2,KIF4A,ARFGAP3,RIN2,TBC1D8B,KIF27,ARFGAP1,KIF15,DENND1A,TBC1D15,REPS1,BCR,BMI1,GNA12,PDE8A,RFC1,RABGAP1L,SLC39A10,ARHGAP22,NEK9,EPS8L2	29/-	TRUE	TRUE
8_Member	Reactome Gene Sets	R-HSA-199991	Membrane Trafficking	-7.10497	-4.35955	372,1523,8674,9185,9493,9632,9712,9871,11252,24137,26286,54453,54885,55582,55738,56992,57706,64786,85021	ARCN1,CUX1,VAMP4,REPS2,KIF23,SEC24C,USP6NL,SEC24D,PACSIN2,KIF4A,ARFGAP3,RIN2,TBC1D8B,KIF27,ARFGAP1,KIF15,DENND1A,TBC1D15,REPS1	19/635	TRUE	TRUE
8_Member	Reactome Gene Sets	R-HSA-5653656	Vesicle-mediated transport	-6.70643	-4.04815	372,1523,8674,9185,9493,9632,9712,9871,11252,24137,26286,54453,54885,55582,55738,56992,57706,64786,85021	ARCN1,CUX1,VAMP4,REPS2,KIF23,SEC24C,USP6NL,SEC24D,PACSIN2,KIF4A,ARFGAP3,RIN2,TBC1D8B,KIF27,ARFGAP1,KIF15,DENND1A,TBC1D15,REPS1	19/674	TRUE	TRUE
8_Member	GO Molecular Functions	GO:0008047	enzyme activator activity	-4.27225	-2.10407	613,648,2768,5151,5981,9712,9910,26286,54453,54885,55738,57181,58504,64786,91754	BCR,BMI1,GNA12,PDE8A,RFC1,USP6NL,RABGAP1L,ARFGAP3,RIN2,TBC1D8B,ARFGAP1,SLC39A10,ARHGAP22,TBC1D15,NEK9	15/665	TRUE	TRUE
8_Member	GO Molecular Functions	GO:0005096	GTPase activator activity	-3.90849	-1.85606	613,9712,9910,26286,54453,54885,55738,58504,64786	BCR,USP6NL,RABGAP1L,ARFGAP3,RIN2,TBC1D8B,ARFGAP1,ARHGAP22,TBC1D15	9/277	TRUE	TRUE
8_Member	GO Molecular Functions	GO:0030695	GTPase regulator activity	-3.21145	-1.29853	613,9712,9910,26286,54453,54885,55738,57706,58504,64786,64787	BCR,USP6NL,RABGAP1L,ARFGAP3,RIN2,TBC1D8B,ARFGAP1,DENND1A,ARHGAP22,TBC1D15,EPS8L2	11/496	TRUE	FALSE
8_Member	GO Molecular Functions	GO:0060589	nucleoside-triphosphatase regulator activity	-3.20426	-1.29276	613,9712,9910,26286,54453,54885,55738,57706,58504,64786,64787	BCR,USP6NL,RABGAP1L,ARFGAP3,RIN2,TBC1D8B,ARFGAP1,DENND1A,ARHGAP22,TBC1D15,EPS8L2	11/497	TRUE	FALSE
9_Summary	GO Molecular Functions	GO:0120543	macromolecular conformation isomerase activity	-7.08029	-4.34442	1662,1975,6597,7153,7458,9493,9557,9879,23064,24137,55582,56916,56992,9360,92126,2091,2956,5981,6897,7515,79068,255374,7317	DDX10,EIF4B,SMARCA4,TOP2A,EIF4H,KIF23,CHD1L,DDX46,SETX,KIF4A,KIF27,SMARCAD1,KIF15,PPIG,DSEL,FBL,MSH6,RFC1,TARS1,XRCC1,FTO,MBLAC1,UBA1	23/-	TRUE	TRUE
9_Member	GO Molecular Functions	GO:0120543	macromolecular conformation isomerase activity	-7.08029	-4.34442	1662,1975,6597,7153,7458,9493,9557,9879,23064,24137,55582,56916,56992	DDX10,EIF4B,SMARCA4,TOP2A,EIF4H,KIF23,CHD1L,DDX46,SETX,KIF4A,KIF27,SMARCAD1,KIF15	13/284	TRUE	TRUE
9_Member	GO Molecular Functions	GO:0016853	isomerase activity	-6.49562	-3.86784	1662,1975,6597,7153,7458,9360,9493,9557,9879,23064,24137,55582,56916,56992,92126	DDX10,EIF4B,SMARCA4,TOP2A,EIF4H,PPIG,KIF23,CHD1L,DDX46,SETX,KIF4A,KIF27,SMARCAD1,KIF15,DSEL	15/434	TRUE	TRUE
9_Member	GO Molecular Functions	GO:0120545	nucleic acid conformation isomerase activity	-5.75631	-3.27149	1662,1975,6597,7153,7458,9557,9879,23064,56916	DDX10,EIF4B,SMARCA4,TOP2A,EIF4H,CHD1L,DDX46,SETX,SMARCAD1	9/162	TRUE	TRUE
9_Member	GO Molecular Functions	GO:0140640	catalytic activity, acting on a nucleic acid	-4.89427	-2.57482	1662,1975,2091,2956,5981,6597,6897,7153,7458,7515,9557,9879,23064,56916,79068,255374	DDX10,EIF4B,FBL,MSH6,RFC1,SMARCA4,TARS1,TOP2A,EIF4H,XRCC1,CHD1L,DDX46,SETX,SMARCAD1,FTO,MBLAC1	16/661	TRUE	TRUE
9_Member	GO Molecular Functions	GO:0008094	ATP-dependent activity, acting on DNA	-4.73284	-2.43801	2956,5981,6597,7153,9557,23064,56916	MSH6,RFC1,SMARCA4,TOP2A,CHD1L,SETX,SMARCAD1	7/120	TRUE	TRUE
9_Member	GO Molecular Functions	GO:0140657	ATP-dependent activity	-4.3103	-2.13421	1662,2956,5981,6597,7153,7317,9493,9557,9879,23064,24137,55582,56916,56992	DDX10,MSH6,RFC1,SMARCA4,TOP2A,UBA1,KIF23,CHD1L,DDX46,SETX,KIF4A,KIF27,SMARCAD1,KIF15	14/583	TRUE	TRUE
9_Member	GO Molecular Functions	GO:0140097	catalytic activity, acting on DNA	-4.18154	-2.04059	2956,5981,6597,7153,7515,9557,23064,56916,79068	MSH6,RFC1,SMARCA4,TOP2A,XRCC1,CHD1L,SETX,SMARCAD1,FTO	9/255	TRUE	TRUE
9_Member	GO Molecular Functions	GO:0140658	ATP-dependent chromatin remodeler activity	-3.30802	-1.37773	6597,9557,56916	SMARCA4,CHD1L,SMARCAD1	3/23	TRUE	TRUE
9_Member	GO Molecular Functions	GO:0004386	helicase activity	-3.25611	-1.33793	1662,6597,9557,9879,23064,56916	DDX10,SMARCA4,CHD1L,DDX46,SETX,SMARCAD1	6/149	TRUE	TRUE
9_Member	GO Molecular Functions	GO:0016887	ATP hydrolysis activity	-2.7557	-0.939127	1662,5981,6597,9493,9557,9879,55582,56916,56992	DDX10,RFC1,SMARCA4,KIF23,CHD1L,DDX46,KIF27,SMARCAD1,KIF15	9/401	TRUE	FALSE
9_Member	GO Molecular Functions	GO:0140098	catalytic activity, acting on RNA	-2.09228	-0.394351	1662,1975,2091,6897,7458,9879,79068,255374	DDX10,EIF4B,FBL,TARS1,EIF4H,DDX46,FTO,MBLAC1	8/419	TRUE	FALSE
10_Summary	GO Cellular Components	GO:0000792	heterochromatin	-6.92162	-4.22195	648,1060,3008,3009,7317,8290,9031,56916	BMI1,CENPC,H1-4,H1-5,UBA1,H3-4,BAZ1B,SMARCAD1	8/-	TRUE	TRUE
10_Member	GO Cellular Components	GO:0000792	heterochromatin	-6.92162	-4.22195	648,1060,3008,3009,7317,8290,9031,56916	BMI1,CENPC,H1-4,H1-5,UBA1,H3-4,BAZ1B,SMARCAD1	8/85	TRUE	TRUE
11_Summary	GO Biological Processes	GO:0051321	meiotic cell cycle	-6.58017	-3.92972	1017,1060,1909,2177,2956,4926,7153,9232,10403,10744,10927,83540	CDK2,CENPC,EDNRA,FANCD2,MSH6,NUMA1,TOP2A,PTTG1,NDC80,PTTG2,SPIN1,NUF2	12/-	TRUE	TRUE
11_Member	GO Biological Processes	GO:0051321	meiotic cell cycle	-6.58017	-3.92972	1017,1060,1909,2177,2956,4926,7153,9232,10403,10744,10927,83540	CDK2,CENPC,EDNRA,FANCD2,MSH6,NUMA1,TOP2A,PTTG1,NDC80,PTTG2,SPIN1,NUF2	12/262	TRUE	TRUE
11_Member	GO Biological Processes	GO:1903046	meiotic cell cycle process	-5.00975	-2.66033	1060,1909,2177,2956,7153,9232,10403,10744,83540	CENPC,EDNRA,FANCD2,MSH6,TOP2A,PTTG1,NDC80,PTTG2,NUF2	9/200	TRUE	TRUE
11_Member	GO Biological Processes	GO:0061982	meiosis I cell cycle process	-4.50821	-2.27094	1060,2177,2956,7153,9232,10403,10744	CENPC,FANCD2,MSH6,TOP2A,PTTG1,NDC80,PTTG2	7/130	TRUE	TRUE
11_Member	GO Biological Processes	GO:0045132	meiotic chromosome segregation	-4.37547	-2.16717	1060,2177,9232,10403,10744,83540	CENPC,FANCD2,PTTG1,NDC80,PTTG2,NUF2	6/93	TRUE	TRUE
11_Member	GO Biological Processes	GO:0140013	meiotic nuclear division	-3.65196	-1.653	1060,2177,7153,9232,10403,10744,83540	CENPC,FANCD2,TOP2A,PTTG1,NDC80,PTTG2,NUF2	7/178	TRUE	TRUE
11_Member	GO Biological Processes	GO:0007127	meiosis I	-3.62684	-1.63813	1060,2177,7153,9232,10403,10744	CENPC,FANCD2,TOP2A,PTTG1,NDC80,PTTG2	6/127	TRUE	TRUE
11_Member	GO Biological Processes	GO:0045143	homologous chromosome segregation	-2.94839	-1.08883	1060,2177,9232,10744	CENPC,FANCD2,PTTG1,PTTG2	4/67	TRUE	FALSE
12_Summary	GO Cellular Components	GO:0016363	nuclear matrix	-6.53185	-3.89664	302,1063,4221,4670,4926,6597,9360,24137,55791	ANXA2,CENPF,MEN1,HNRNPM,NUMA1,SMARCA4,PPIG,KIF4A,LRIF1	9/-	TRUE	TRUE
12_Member	GO Cellular Components	GO:0016363	nuclear matrix	-6.53185	-3.89664	302,1063,4221,4670,4926,6597,9360,24137,55791	ANXA2,CENPF,MEN1,HNRNPM,NUMA1,SMARCA4,PPIG,KIF4A,LRIF1	9/131	TRUE	TRUE
13_Summary	GO Biological Processes	GO:0090068	positive regulation of cell cycle process	-6.28922	-3.71013	699,983,1981,4926,5925,9493,10403,11113,55143,55968,56852,255374,3020,3021,5339,57122,10982,55183	BUB1,CDK1,EIF4G1,NUMA1,RB1,KIF23,NDC80,CIT,CDCA8,NSFL1C,RAD18,MBLAC1,H3-3A,H3-3B,PLEC,NUP107,MAPRE2,RIF1	18/-	TRUE	TRUE
13_Member	GO Biological Processes	GO:0090068	positive regulation of cell cycle process	-6.28922	-3.71013	699,983,1981,4926,5925,9493,10403,11113,55143,55968,56852,255374	BUB1,CDK1,EIF4G1,NUMA1,RB1,KIF23,NDC80,CIT,CDCA8,NSFL1C,RAD18,MBLAC1	12/279	TRUE	TRUE
13_Member	GO Biological Processes	GO:0045787	positive regulation of cell cycle	-5.26803	-2.87698	699,983,1981,4926,5925,9493,10403,11113,55143,55968,56852,255374	BUB1,CDK1,EIF4G1,NUMA1,RB1,KIF23,NDC80,CIT,CDCA8,NSFL1C,RAD18,MBLAC1	12/350	TRUE	TRUE
13_Member	GO Biological Processes	GO:0051984	positive regulation of chromosome segregation	-4.31013	-2.13421	983,4926,55143,56852	CDK1,NUMA1,CDCA8,RAD18	4/30	TRUE	TRUE
13_Member	GO Biological Processes	GO:0006997	nucleus organization	-3.98882	-1.91447	983,3020,3021,4926,5339,55968,57122	CDK1,H3-3A,H3-3B,NUMA1,PLEC,NSFL1C,NUP107	7/157	TRUE	TRUE
13_Member	GO Cellular Components	GO:0051233	spindle midzone	-3.89823	-1.85178	4926,10982,55143,55183	NUMA1,MAPRE2,CDCA8,RIF1	4/38	TRUE	TRUE
13_Member	GO Biological Processes	GO:0090235	regulation of metaphase plate congression	-3.88086	-1.83877	983,4926,55143	CDK1,NUMA1,CDCA8	3/15	TRUE	TRUE
13_Member	GO Biological Processes	GO:1905820	positive regulation of chromosome separation	-2.84101	-1.00467	4926,5925,55143	NUMA1,RB1,CDCA8	3/33	TRUE	FALSE
13_Member	GO Biological Processes	GO:0000132	establishment of mitotic spindle orientation	-2.6961	-0.88742	4926,10403,55968	NUMA1,NDC80,NSFL1C	3/37	TRUE	FALSE
13_Member	GO Biological Processes	GO:0040001	establishment of mitotic spindle localization	-2.53737	-0.766007	4926,10403,55968	NUMA1,NDC80,NSFL1C	3/42	TRUE	FALSE
13_Member	GO Biological Processes	GO:0051294	establishment of spindle orientation	-2.39816	-0.641988	4926,10403,55968	NUMA1,NDC80,NSFL1C	3/47	TRUE	FALSE
13_Member	GO Biological Processes	GO:0051293	establishment of spindle localization	-2.08194	-0.386598	4926,10403,55968	NUMA1,NDC80,NSFL1C	3/61	TRUE	FALSE
14_Summary	GO Biological Processes	GO:0031023	microtubule organizing center organization	-5.93621	-3.41839	983,1017,5108,9659,10403,10432,56992,284403	CDK1,CDK2,PCM1,PDE4DIP,NDC80,RBM14,KIF15,WDR62	8/-	TRUE	TRUE
14_Member	GO Biological Processes	GO:0031023	microtubule organizing center organization	-5.93621	-3.41839	983,1017,5108,9659,10403,10432,56992,284403	CDK1,CDK2,PCM1,PDE4DIP,NDC80,RBM14,KIF15,WDR62	8/114	TRUE	TRUE
14_Member	GO Biological Processes	GO:0007098	centrosome cycle	-5.25337	-2.87177	983,1017,5108,9659,10403,56992,284403	CDK1,CDK2,PCM1,PDE4DIP,NDC80,KIF15,WDR62	7/100	TRUE	TRUE
14_Member	GO Biological Processes	GO:0098534	centriole assembly	-2.84101	-1.00467	1017,10432,284403	CDK2,RBM14,WDR62	3/33	TRUE	FALSE
14_Member	GO Biological Processes	GO:0051298	centrosome duplication	-2.62994	-0.835534	1017,10403,284403	CDK2,NDC80,WDR62	3/39	TRUE	FALSE
15_Summary	GO Biological Processes	GO:0032200	telomere organization	-5.45685	-3.00761	1017,3020,3021,5981,6672,7515,8350,55183	CDK2,H3-3A,H3-3B,RFC1,SP100,XRCC1,H3C1,RIF1	8/-	TRUE	TRUE
15_Member	GO Biological Processes	GO:0032200	telomere organization	-5.45685	-3.00761	1017,3020,3021,5981,6672,7515,8350,55183	CDK2,H3-3A,H3-3B,RFC1,SP100,XRCC1,H3C1,RIF1	8/132	TRUE	TRUE
15_Member	GO Biological Processes	GO:0000723	telomere maintenance	-3.11884	-1.23075	1017,5981,6672,7515,55183	CDK2,RFC1,SP100,XRCC1,RIF1	5/105	TRUE	FALSE
16_Summary	GO Biological Processes	GO:0006351	DNA-templated transcription	-5.42747	-3.00478	302,1017,4221,5253,5925,6597,6660,6949,7343,10432,10927,23064,23469,55870,84656,221830	ANXA2,CDK2,MEN1,PHF2,RB1,SMARCA4,SOX5,TCOF1,UBTF,RBM14,SPIN1,SETX,PHF3,ASH1L,GLYR1,POLR1F	16/-	TRUE	TRUE
16_Member	GO Biological Processes	GO:0006351	DNA-templated transcription	-5.42747	-3.00478	302,1017,4221,5253,5925,6597,6660,6949,7343,10432,10927,23064,23469,55870,84656,221830	ANXA2,CDK2,MEN1,PHF2,RB1,SMARCA4,SOX5,TCOF1,UBTF,RBM14,SPIN1,SETX,PHF3,ASH1L,GLYR1,POLR1F	16/599	TRUE	TRUE
16_Member	GO Biological Processes	GO:0045815	transcription initiation-coupled chromatin remodeling	-4.48242	-2.25111	4221,5253,6597,10432,84656	MEN1,PHF2,SMARCA4,RBM14,GLYR1	5/54	TRUE	TRUE
16_Member	GO Biological Processes	GO:0141137	positive regulation of gene expression, epigenetic	-4.33093	-2.13421	4221,5253,6597,10432,84656	MEN1,PHF2,SMARCA4,RBM14,GLYR1	5/58	TRUE	TRUE
16_Member	GO Biological Processes	GO:0006352	DNA-templated transcription initiation	-3.41197	-1.4605	4221,5253,6597,7343,10432,84656,221830	MEN1,PHF2,SMARCA4,UBTF,RBM14,GLYR1,POLR1F	7/195	TRUE	TRUE
16_Member	GO Biological Processes	GO:0006366	transcription by RNA polymerase II	-2.97293	-1.1095	302,4221,5253,5925,6597,6660,10432,23064,55870,84656	ANXA2,MEN1,PHF2,RB1,SMARCA4,SOX5,RBM14,SETX,ASH1L,GLYR1	10/450	TRUE	FALSE
16_Member	GO Biological Processes	GO:0006367	transcription initiation at RNA polymerase II promoter	-2.3307	-0.585279	4221,5253,6597,10432,84656	MEN1,PHF2,SMARCA4,RBM14,GLYR1	5/159	TRUE	FALSE
17_Summary	Reactome Gene Sets	R-HSA-3301854	Nuclear Pore Complex (NPC) Disassembly	-5.42569	-3.00478	983,9883,57122,91754,140609,302,304,699,1017,3178,4926,5925,9659,10142,55604,253725,613,1018,11113	CDK1,POM121,NUP107,NEK9,NEK7,ANXA2,ANXA2P2,BUB1,CDK2,HNRNPA1,NUMA1,RB1,PDE4DIP,AKAP9,CARMIL1,WASHC2C,BCR,CDK3,CIT	19/-	TRUE	TRUE
17_Member	Reactome Gene Sets	R-HSA-3301854	Nuclear Pore Complex (NPC) Disassembly	-5.42569	-3.00478	983,9883,57122,91754,140609	CDK1,POM121,NUP107,NEK9,NEK7	5/35	TRUE	TRUE
17_Member	Reactome Gene Sets	R-HSA-2980767	Activation of NIMA Kinases NEK9, NEK6, NEK7	-4.97739	-2.64065	983,91754,140609	CDK1,NEK9,NEK7	3/7	TRUE	TRUE
17_Member	Reactome Gene Sets	R-HSA-2980766	Nuclear Envelope Breakdown	-4.56288	-2.31347	983,9883,57122,91754,140609	CDK1,POM121,NUP107,NEK9,NEK7	5/52	TRUE	TRUE
17_Member	GO Biological Processes	GO:0010638	positive regulation of organelle organization	-4.26606	-2.10042	302,304,699,983,1017,3178,4926,5925,9659,10142,55604,140609,253725	ANXA2,ANXA2P2,BUB1,CDK1,CDK2,HNRNPA1,NUMA1,RB1,PDE4DIP,AKAP9,CARMIL1,NEK7,WASHC2C	13/514	TRUE	TRUE
17_Member	GO Biological Processes	GO:2001252	positive regulation of chromosome organization	-4.08014	-1.97226	699,983,1017,3178,4926,140609	BUB1,CDK1,CDK2,HNRNPA1,NUMA1,NEK7	6/105	TRUE	TRUE
17_Member	GO Molecular Functions	GO:0106310	protein serine kinase activity	-2.46447	-0.700308	613,699,983,1017,1018,11113,91754,140609	BCR,BUB1,CDK1,CDK2,CDK3,CIT,NEK9,NEK7	8/362	TRUE	FALSE
17_Member	GO Molecular Functions	GO:0004674	protein serine/threonine kinase activity	-2.00592	-0.329096	613,699,983,1017,1018,11113,91754,140609	BCR,BUB1,CDK1,CDK2,CDK3,CIT,NEK9,NEK7	8/434	TRUE	FALSE
18_Summary	GO Biological Processes	GO:0045943	positive regulation of transcription by RNA polymerase I	-5.36314	-2.96157	4691,6597,7343,9031,55646,6949,221830,2091,9879,63901	NCL,SMARCA4,UBTF,BAZ1B,LYAR,TCOF1,POLR1F,FBL,DDX46,FAM111A	10/-	TRUE	TRUE
18_Member	GO Biological Processes	GO:0045943	positive regulation of transcription by RNA polymerase I	-5.36314	-2.96157	4691,6597,7343,9031,55646	NCL,SMARCA4,UBTF,BAZ1B,LYAR	5/36	TRUE	TRUE
18_Member	GO Biological Processes	GO:0006356	regulation of transcription by RNA polymerase I	-4.73456	-2.43801	4691,6597,7343,9031,55646	NCL,SMARCA4,UBTF,BAZ1B,LYAR	5/48	TRUE	TRUE
18_Member	GO Biological Processes	GO:0006360	transcription by RNA polymerase I	-4.14294	-2.01614	6597,6949,7343,221830	SMARCA4,TCOF1,UBTF,POLR1F	4/33	TRUE	TRUE
18_Member	GO Cellular Components	GO:0001650	fibrillar center	-3.07998	-1.19854	2091,6597,6949,7343,9879,63901	FBL,SMARCA4,TCOF1,UBTF,DDX46,FAM111A	6/161	TRUE	FALSE
19_Summary	GO Cellular Components	GO:0035770	ribonucleoprotein granule	-5.36021	-2.96157	1017,1981,2091,4670,4691,6741,9320,9360,9774,9879,10403,10432,11252,49855,55337,55604,79068,80230	CDK2,EIF4G1,FBL,HNRNPM,NCL,SSB,TRIP12,PPIG,BCLAF1,DDX46,NDC80,RBM14,PACSIN2,SCAPER,SHFL,CARMIL1,FTO,RUFY1	18/-	TRUE	TRUE
19_Member	GO Cellular Components	GO:0035770	ribonucleoprotein granule	-5.36021	-2.96157	1017,1981,2091,4670,4691,6741,9320,9360,9774,9879,10403,10432,11252,49855,55337,55604,79068,80230	CDK2,EIF4G1,FBL,HNRNPM,NCL,SSB,TRIP12,PPIG,BCLAF1,DDX46,NDC80,RBM14,PACSIN2,SCAPER,SHFL,CARMIL1,FTO,RUFY1	18/754	TRUE	TRUE
19_Member	GO Cellular Components	GO:0140168	nuclear ribonucleoprotein granule	-4.97482	-2.64065	1017,2091,4670,9320,9360,9774,9879,10403,10432,11252,49855,55604,79068,80230	CDK2,FBL,HNRNPM,TRIP12,PPIG,BCLAF1,DDX46,NDC80,RBM14,PACSIN2,SCAPER,CARMIL1,FTO,RUFY1	14/507	TRUE	TRUE
19_Member	GO Cellular Components	GO:0016607	nuclear speck	-3.72487	-1.71184	9320,9360,9774,9879,10403,10432,11252,49855,55604,79068,80230	TRIP12,PPIG,BCLAF1,DDX46,NDC80,RBM14,PACSIN2,SCAPER,CARMIL1,FTO,RUFY1	11/431	TRUE	TRUE
20_Summary	GO Biological Processes	GO:0043254	regulation of protein-containing complex assembly	-4.98635	-2.6408	1981,3020,3021,4926,5925,9659,10142,25959,54434,55604,91754,140609,253725,10391,10432,10982,11113,91147,387680,9712,1017,9076,54443,64787,51512,5108	EIF4G1,H3-3A,H3-3B,NUMA1,RB1,PDE4DIP,AKAP9,KANK2,SSH1,CARMIL1,NEK9,NEK7,WASHC2C,CORO2B,RBM14,MAPRE2,CIT,TMEM67,WASHC2A,USP6NL,CDK2,CLDN1,ANLN,EPS8L2,GTSE1,PCM1	26/-	TRUE	TRUE
20_Member	GO Biological Processes	GO:0043254	regulation of protein-containing complex assembly	-4.98635	-2.6408	1981,3020,3021,4926,5925,9659,10142,25959,54434,55604,91754,140609,253725	EIF4G1,H3-3A,H3-3B,NUMA1,RB1,PDE4DIP,AKAP9,KANK2,SSH1,CARMIL1,NEK9,NEK7,WASHC2C	13/438	TRUE	TRUE
20_Member	GO Biological Processes	GO:0031334	positive regulation of protein-containing complex assembly	-4.00358	-1.9167	1981,4926,9659,10142,55604,91754,140609,253725	EIF4G1,NUMA1,PDE4DIP,AKAP9,CARMIL1,NEK9,NEK7,WASHC2C	8/210	TRUE	TRUE
20_Member	GO Biological Processes	GO:0051493	regulation of cytoskeleton organization	-3.99518	-1.91447	4926,9659,10142,10391,10432,10982,11113,25959,54434,55604,91147,253725,387680	NUMA1,PDE4DIP,AKAP9,CORO2B,RBM14,MAPRE2,CIT,KANK2,SSH1,CARMIL1,TMEM67,WASHC2C,WASHC2A	13/547	TRUE	TRUE
20_Member	GO Biological Processes	GO:1903358	regulation of Golgi organization	-3.79286	-1.76529	9659,9712,10142	PDE4DIP,USP6NL,AKAP9	3/16	TRUE	TRUE
20_Member	GO Biological Processes	GO:0044089	positive regulation of cellular component biogenesis	-3.50751	-1.53539	1017,1981,4926,9076,9659,10142,54443,55604,64787,91754,140609,253725	CDK2,EIF4G1,NUMA1,CLDN1,PDE4DIP,AKAP9,ANLN,CARMIL1,EPS8L2,NEK9,NEK7,WASHC2C	12/534	TRUE	TRUE
20_Member	GO Biological Processes	GO:0032273	positive regulation of protein polymerization	-3.40297	-1.45459	4926,9659,10142,55604,253725	NUMA1,PDE4DIP,AKAP9,CARMIL1,WASHC2C	5/91	TRUE	TRUE
20_Member	GO Biological Processes	GO:0032271	regulation of protein polymerization	-3.32033	-1.38708	4926,9659,10142,25959,54434,55604,253725	NUMA1,PDE4DIP,AKAP9,KANK2,SSH1,CARMIL1,WASHC2C	7/202	TRUE	TRUE
20_Member	GO Cellular Components	GO:0035371	microtubule plus-end	-3.14777	-1.25156	4926,9659,10982	NUMA1,PDE4DIP,MAPRE2	3/26	TRUE	FALSE
20_Member	GO Biological Processes	GO:0031116	positive regulation of microtubule polymerization	-2.84101	-1.00467	4926,9659,10142	NUMA1,PDE4DIP,AKAP9	3/33	TRUE	FALSE
20_Member	GO Biological Processes	GO:1902903	regulation of supramolecular fiber organization	-2.80023	-0.974465	4926,9659,10142,10391,25959,54434,55604,253725,387680	NUMA1,PDE4DIP,AKAP9,CORO2B,KANK2,SSH1,CARMIL1,WASHC2C,WASHC2A	9/395	TRUE	FALSE
20_Member	GO Cellular Components	GO:1990752	microtubule end	-2.73067	-0.919745	4926,9659,10982	NUMA1,PDE4DIP,MAPRE2	3/36	TRUE	FALSE
20_Member	GO Biological Processes	GO:0031112	positive regulation of microtubule polymerization or depolymerization	-2.66255	-0.857199	4926,9659,10142	NUMA1,PDE4DIP,AKAP9	3/38	TRUE	FALSE
20_Member	GO Biological Processes	GO:0031110	regulation of microtubule polymerization or depolymerization	-2.25456	-0.526168	4926,9659,10142,10982	NUMA1,PDE4DIP,AKAP9,MAPRE2	4/104	TRUE	FALSE
20_Member	GO Biological Processes	GO:0032970	regulation of actin filament-based process	-2.1956	-0.478204	10142,10391,11113,25959,54434,55604,253725,387680	AKAP9,CORO2B,CIT,KANK2,SSH1,CARMIL1,WASHC2C,WASHC2A	8/402	TRUE	FALSE
20_Member	GO Biological Processes	GO:1902905	positive regulation of supramolecular fiber organization	-2.14728	-0.437951	4926,9659,10142,55604,253725	NUMA1,PDE4DIP,AKAP9,CARMIL1,WASHC2C	5/176	TRUE	FALSE
20_Member	GO Cellular Components	GO:0005881	cytoplasmic microtubule	-2.01421	-0.334903	4926,9659,10982,51512	NUMA1,PDE4DIP,MAPRE2,GTSE1	4/122	TRUE	FALSE
20_Member	GO Biological Processes	GO:0031122	cytoplasmic microtubule organization	-2.0064	-0.329096	4926,5108,9659	NUMA1,PCM1,PDE4DIP	3/65	TRUE	FALSE
20_Member	GO Biological Processes	GO:0051495	positive regulation of cytoskeleton organization	-2.00276	-0.327747	4926,9659,10142,55604,253725	NUMA1,PDE4DIP,AKAP9,CARMIL1,WASHC2C	5/191	TRUE	FALSE
